# Supplementary material for: Toward an atlas of Salish Sea biodiversity: the flora and fauna of Galiano Island, British Columbia, Canada. Part I. Marine zoology
Source: Biodivers Data J. 2022 Mar 10;10:e76050. doi: 10.3897/BDJ.10.e76050 (PMC8930920; doi:10.3897/BDJ.10.e76050)
Supplement: Supplementary material 2 — Porifera of Galiano Island, British Columbia, Canada [file bdj-10-e76050-s002.xlsx]

## Sheet: Taxa
Taxon_Local_ID	Kingdom	Subkingdom	Phylum	Subphylum	Superclass	Class	Subclass	Superorder	Order	Suborder	Infraorder	Superfamily	Family	Subfamily	Tribe	Subtribe	Genus	Subgenus	Species	Subspecies	Variety	Form	Authorship	Nomenclature	Feeds on	symbioticWith	parasiteOf	Host of	Native Status	Conservation Status	Distribution	Horizon	Notes
117713	Animalia		Porifera			Calcarea	Calcaronea		Leucosolenida				Amphoriscidae				Leucilla		nuttingi				(Urban, 1902)
345357	Animalia		Porifera			Calcarea	Calcaronea		Leucosolenida				Grantiidae				Leucandra		heathi				Urban, 1906
424817	Animalia		Porifera			Calcarea	Calcaronea		Leucosolenida				Leucosoleniidae				Leucosolenia		eleanor				Urban, 1906
347319	Animalia		Porifera			Calcarea	Calcaronea		Leucosolenida				Leucosoleniidae				Leucosolenia		nautilia				de Laubenfels, 1930
347738	Animalia		Porifera			Calcarea	Calcaronea		Leucosolenida				Sycettidae				Sycon		spp.
122021	Animalia		Porifera			Calcarea	Calcinea		Clathrinida				Clathrinidae				Clathrina		sp.
424811	Animalia		Porifera			Demospongiae	Heteroscleromorpha		Clionaida				Clionaidae				Cliona		californiana				de Laubenfels, 1932
459736	Animalia		Porifera			Demospongiae	Heteroscleromorpha		Desmacellida				Desmacellidae				Desmacella		austini				Lehnert, Conway, Barrie & Krautter, 2005
1227076	Animalia		Porifera			Demospongiae	Heteroscleromorpha		Haplosclerida				Chalinidae				Haliclona	Haliclona	sp.1														Reported as Reniera sp. nov.; Reniera is an unaccepted synonym (WoRMS Editorial Board 2021).
1227087	Animalia		Porifera			Demospongiae	Heteroscleromorpha		Haplosclerida				Chalinidae				Haliclona	Haliclona	sp.2														Reported as Adocia sp.; "Adocia originally included Haplosclerida with Haliclona skeletal structure and a distinct ectosome. The genus Adocia was synonymized with Haliclona subgenus Haliclona by de Weerdt (2002) in Systema Porifera (Hooper and van Soest 2002)" (Bruce Ott pers. comm. 2021).
873877	Animalia		Porifera			Demospongiae	Heteroscleromorpha		Haplosclerida				Niphatidae				Pachychalina		sp.
873856	Animalia		Porifera			Demospongiae	Heteroscleromorpha		Haplosclerida				Petrosiidae				Xestospongia		hispida				(Ridley & Dendy, 1886)
63669	Animalia		Porifera			Demospongiae	Heteroscleromorpha		Poecilosclerida				Acarnidae				Acarnus		erithacus				de Laubenfels, 1927
196333	Animalia		Porifera			Demospongiae	Heteroscleromorpha		Poecilosclerida				Acarnidae				Iophon		lamella				Wilson, 1904
459874	Animalia		Porifera			Demospongiae	Heteroscleromorpha		Poecilosclerida				Esperiopsidae				Amphilectus		digitatus				(Miklucho-Maclay, 1870)
194571	Animalia		Porifera			Demospongiae	Heteroscleromorpha		Poecilosclerida				Esperiopsidae				Semisuberites		cribrosa				(Miklucho-Maclay, 1870)
342247	Animalia		Porifera			Demospongiae	Heteroscleromorpha		Poecilosclerida				Hymedesmiidae				Hamigera		sp.
459878	Animalia		Porifera			Demospongiae	Heteroscleromorpha		Poecilosclerida				Isodictyidae				Isodictya		rigida				(Lambe, 1893)
63672	Animalia		Porifera			Demospongiae	Heteroscleromorpha		Poecilosclerida				Microcionidae	Microcioninae			Clathria	Microciona	pennata				(Lambe, 1895)
345142	Animalia		Porifera			Demospongiae	Heteroscleromorpha		Poecilosclerida				Microcionidae	Ophlitaspongiinae			Antho	Plocamia	karykina				(de Laubenfels, 1927)
256010	Animalia		Porifera			Demospongiae	Heteroscleromorpha		Poecilosclerida				Mycalidae				Mycale	Aegogropila	adhaerens				(Lambe, 1893)
256019	Animalia		Porifera			Demospongiae	Heteroscleromorpha		Poecilosclerida				Myxillidae				Myxilla	Myxilla	incrustans				(Johnston, 1842)
459826	Animalia		Porifera			Demospongiae	Heteroscleromorpha		Poecilosclerida				Myxillidae				Myxilla	Myxilla	lacunosa				Lambe, 1893
117717	Animalia		Porifera			Demospongiae	Heteroscleromorpha		Polymastiida				Polymastiidae				Polymastia		pachymastia				de Laubenfels, 1932
424640	Animalia		Porifera			Demospongiae	Heteroscleromorpha		Polymastiida				Polymastiidae				Weberella		perlucida				Austin, Ott, Reiswig, Romagosa & McDaniel, 2014
120498	Animalia		Porifera			Demospongiae	Heteroscleromorpha		Suberitida				Halichondriidae				Halichondria	Halichondria	bowerbanki				Burton, 1930
186854	Animalia		Porifera			Demospongiae	Heteroscleromorpha		Suberitida				Halichondriidae				Halichondria	Halichondria	panicea				(Pallas, 1766)
459775	Animalia		Porifera			Demospongiae	Heteroscleromorpha		Suberitida				Halichondriidae				Halichondria	Eumastia	sitiens				(Schmidt, 1870)
459847	Animalia		Porifera			Demospongiae	Heteroscleromorpha		Suberitida				Suberitidae				Homaxinella		amphispicula				(de Laubenfels, 1961)
873889	Animalia		Porifera			Demospongiae	Heteroscleromorpha		Suberitida				Suberitidae				Suberites		concinnus				Lambe, 1895
473057	Animalia		Porifera			Demospongiae	Heteroscleromorpha		Suberitida				Suberitidae				Suberites		latus				Lambe, 1893
127233	Animalia		Porifera			Demospongiae	Heteroscleromorpha		Tethyida				Tethyidae				Tethya		californiana				de Laubenfels, 1932
459732	Animalia		Porifera			Demospongiae	Heteroscleromorpha		Tetractinellida	Spirophorina			Tetillidae				Craniella		villosa				Lambe, 1893
247194	Animalia		Porifera			Demospongiae	Heteroscleromorpha		Tetractinellida	Spirophorina			Tetillidae				Tetilla		sp.
213993	Animalia		Porifera			Demospongiae	Keratosa		Dendroceratida				Darwinellidae				Aplysilla		polyraphis				de Laubenfels, 1930
63646	Animalia		Porifera			Demospongiae	Keratosa		Dendroceratida				Darwinellidae				Aplysilla		sp.
623055	Animalia		Porifera			Demospongiae	Keratosa		Dictyoceratida				Dysideidae				Pleraplysilla		sp.
751673	Animalia		Porifera			Hexactinellida	Hexasterophora		Lyssacinosida				Rossellidae				Rhabdocalyptus		dawsoni				(Lambe, 1893)
424651	Animalia		Porifera			Hexactinellida	Hexasterophora		Sceptrulophora				Aphrocallistidae				Aphrocallistes		vastus				Schulze, 1886
424648	Animalia		Porifera			Hexactinellida	Hexasterophora		Sceptrulophora				Aphrocallistidae				Heterochone		calyx				(Schulze, 1886)

## Sheet: Materials
typeStatus	occurrenceID	catalogNumber	occurrenceDetails	occurrenceRemarks	recordNumber	recordedBy	individualID	individualCount	sex	lifeStage	reproductiveCondition	behavior	establishmentMeans	occurrenceStatus	preparations	disposition	otherCatalogNumbers	previousIdentifications	associatedMedia	associatedReferences	associatedOccurrences	associatedSequences	taxonID	scientificNameID	acceptedNameUsageID	parentNameUsageID	originalNameUsageID	nameAccordingToID	namePublishedInID	taxonConceptID	scientificName	acceptedNameUsage	parentNameUsage	originalNameUsage	nameAccordingTo	namePublishedIn	higherClassification	kingdom	phylum	class	order	family	genus	specificEpithet	infraspecificEpithet	taxonRank	verbatimTaxonRank	scientificNameAuthorship	vernacularName
	imerss.org:PMLS:0					Andy Lamb								PRESENT				Halichondria (Halichondria) panicea					iNaturalist:186854								Halichondria (Halichondria) panicea							Animalia	Porifera	Demospongiae	Suberitida	Halichondriidae	Halichondria	panicea		species		(Pallas, 1766)
	imerss.org:PMLS:56					Andy Lamb								PRESENT				Halichondria (Halichondria) panicea					iNaturalist:186854								Halichondria (Halichondria) panicea							Animalia	Porifera	Demospongiae	Suberitida	Halichondriidae	Halichondria	panicea		species		(Pallas, 1766)
	imerss.org:PMLS:96					Andy Lamb								PRESENT				Leucandra heathi					iNaturalist:345357								Leucandra heathi							Animalia	Porifera	Calcarea	Leucosolenida	Grantiidae	Leucandra	heathi		species		Urban, 1906
	imerss.org:PMLS:97					Andy Lamb								PRESENT				Isodictya rigida					iNaturalist:459878								Isodictya rigida							Animalia	Porifera	Demospongiae	Poecilosclerida	Isodictyidae	Isodictya	rigida		species		(Lambe, 1893)
	imerss.org:PMLS:98					Andy Lamb								PRESENT				Clathria (Microciona) pennata					iNaturalist:63672								Clathria (Microciona) pennata							Animalia	Porifera	Demospongiae	Poecilosclerida	Microcionidae	Clathria	pennata		species		(Lambe, 1895)
	imerss.org:PMLS:134					Andy Lamb								PRESENT				Cliona californiana					iNaturalist:424811								Cliona californiana							Animalia	Porifera	Demospongiae	Clionaida	Clionaidae	Cliona	californiana		species		de Laubenfels, 1932
	imerss.org:PMLS:135					Andy Lamb								PRESENT				Isodictya rigida					iNaturalist:459878								Isodictya rigida							Animalia	Porifera	Demospongiae	Poecilosclerida	Isodictyidae	Isodictya	rigida		species		(Lambe, 1893)
	imerss.org:PMLS:136					Andy Lamb								PRESENT				Iophon lamella					iNaturalist:196333								Iophon lamella							Animalia	Porifera	Demospongiae	Poecilosclerida	Acarnidae	Iophon	lamella		species		Wilson, 1904
	imerss.org:PMLS:137					Andy Lamb								PRESENT				Myxilla (Myxilla) lacunosa					iNaturalist:459826								Myxilla (Myxilla) lacunosa							Animalia	Porifera	Demospongiae	Poecilosclerida	Myxillidae	Myxilla	lacunosa		species		Lambe, 1893
	imerss.org:PMLS:138					Andy Lamb								PRESENT				Halichondria (Halichondria) bowerbanki					iNaturalist:120498								Halichondria (Halichondria) bowerbanki							Animalia	Porifera	Demospongiae	Suberitida	Halichondriidae	Halichondria	bowerbanki		species		Burton, 1930
	imerss.org:PMLS:139					Andy Lamb								PRESENT				Clathria (Microciona) pennata					iNaturalist:63672								Clathria (Microciona) pennata							Animalia	Porifera	Demospongiae	Poecilosclerida	Microcionidae	Clathria	pennata		species		(Lambe, 1895)
	imerss.org:PMLS:229					Andy Lamb								PRESENT				Tethya californiana					iNaturalist:127233								Tethya californiana							Animalia	Porifera	Demospongiae	Tethyida	Tethyidae	Tethya	californiana		species		de Laubenfels, 1932
	imerss.org:PMLS:230					Andy Lamb								PRESENT				Amphilectus digitatus					iNaturalist:459874								Amphilectus digitatus							Animalia	Porifera	Demospongiae	Poecilosclerida	Esperiopsidae	Amphilectus	digitatus		species		(Miklucho-Maclay, 1870)
	imerss.org:PMLS:284					Andy Lamb								PRESENT				Leucilla nuttingi					iNaturalist:117713								Leucilla nuttingi							Animalia	Porifera	Calcarea	Leucosolenida	Amphoriscidae	Leucilla	nuttingi		species		(Urban, 1902)
	imerss.org:PMLS:285					Andy Lamb								PRESENT				Myxilla (Myxilla) lacunosa					iNaturalist:459826								Myxilla (Myxilla) lacunosa							Animalia	Porifera	Demospongiae	Poecilosclerida	Myxillidae	Myxilla	lacunosa		species		Lambe, 1893
	imerss.org:PMLS:286					Andy Lamb								PRESENT				Clathria (Microciona) pennata					iNaturalist:63672								Clathria (Microciona) pennata							Animalia	Porifera	Demospongiae	Poecilosclerida	Microcionidae	Clathria	pennata		species		(Lambe, 1895)
	imerss.org:PMLS:361					Andy Lamb								PRESENT				Leucilla nuttingi					iNaturalist:117713								Leucilla nuttingi							Animalia	Porifera	Calcarea	Leucosolenida	Amphoriscidae	Leucilla	nuttingi		species		(Urban, 1902)
	imerss.org:PMLS:362			Count: some		Andy Lamb								PRESENT				Craniella villosa					iNaturalist:459732								Craniella villosa							Animalia	Porifera	Demospongiae	Tetractinellida	Tetillidae	Craniella	villosa		species		Lambe, 1893
	imerss.org:PMLS:363			Count: some		Andy Lamb								PRESENT				Cliona californiana					iNaturalist:424811								Cliona californiana							Animalia	Porifera	Demospongiae	Clionaida	Clionaidae	Cliona	californiana		species		de Laubenfels, 1932
	imerss.org:PMLS:364					Andy Lamb								PRESENT				Suberites concinnus					iNaturalist:873889								Suberites concinnus							Animalia	Porifera	Demospongiae	Suberitida	Suberitidae	Suberites	concinnus		species		Lambe, 1895
	imerss.org:PMLS:365			Count: few		Andy Lamb								PRESENT				Semisuberites cribrosa					iNaturalist:194571								Semisuberites cribrosa							Animalia	Porifera	Demospongiae	Poecilosclerida	Esperiopsidae	Semisuberites	cribrosa		species		(Miklucho-Maclay, 1870)
	imerss.org:PMLS:366					Andy Lamb								PRESENT				Pachychalina sp.					iNaturalist:873877								Pachychalina							Animalia	Porifera	Demospongiae	Haplosclerida	Niphatidae	Pachychalina			genus
	imerss.org:PMLS:367					Andy Lamb								PRESENT				Myxilla (Myxilla) lacunosa					iNaturalist:459826								Myxilla (Myxilla) lacunosa							Animalia	Porifera	Demospongiae	Poecilosclerida	Myxillidae	Myxilla	lacunosa		species		Lambe, 1893
	imerss.org:PMLS:368					Andy Lamb								PRESENT				Hamigera sp.					iNaturalist:342247								Hamigera							Animalia	Porifera	Demospongiae	Poecilosclerida	Hymedesmiidae	Hamigera			genus
	imerss.org:PMLS:369					Andy Lamb								PRESENT				Aplysilla sp. nov.					iNaturalist:63646								Aplysilla							Animalia	Porifera	Demospongiae	Dendroceratida	Darwinellidae	Aplysilla			genus
	imerss.org:PMLS:370					Andy Lamb								PRESENT				Antho (Plocamia) karykina					iNaturalist:345142								Antho (Plocamia) karykina							Animalia	Porifera	Demospongiae	Poecilosclerida	Microcionidae	Antho	karykina		species		(de Laubenfels, 1927)
	imerss.org:PMLS:371					Andy Lamb								PRESENT				Clathria (Microciona) pennata					iNaturalist:63672								Clathria (Microciona) pennata							Animalia	Porifera	Demospongiae	Poecilosclerida	Microcionidae	Clathria	pennata		species		(Lambe, 1895)
	imerss.org:PMLS:462			Count: many		Andy Lamb								PRESENT				Leucilla nuttingi					iNaturalist:117713								Leucilla nuttingi							Animalia	Porifera	Calcarea	Leucosolenida	Amphoriscidae	Leucilla	nuttingi		species		(Urban, 1902)
	imerss.org:PMLS:463					Andy Lamb		1						PRESENT				Craniella villosa					iNaturalist:459732								Craniella villosa							Animalia	Porifera	Demospongiae	Tetractinellida	Tetillidae	Craniella	villosa		species		Lambe, 1893
	imerss.org:PMLS:464			Count: few		Andy Lamb								PRESENT				Cliona californiana					iNaturalist:424811								Cliona californiana							Animalia	Porifera	Demospongiae	Clionaida	Clionaidae	Cliona	californiana		species		de Laubenfels, 1932
	imerss.org:PMLS:465					Andy Lamb								PRESENT				Suberites concinnus					iNaturalist:873889								Suberites concinnus							Animalia	Porifera	Demospongiae	Suberitida	Suberitidae	Suberites	concinnus		species		Lambe, 1895
	imerss.org:PMLS:466			Count: some		Andy Lamb								PRESENT				Semisuberites cribrosa					iNaturalist:194571								Semisuberites cribrosa							Animalia	Porifera	Demospongiae	Poecilosclerida	Esperiopsidae	Semisuberites	cribrosa		species		(Miklucho-Maclay, 1870)
	imerss.org:PMLS:467					Andy Lamb								PRESENT				Myxilla (Myxilla) lacunosa					iNaturalist:459826								Myxilla (Myxilla) lacunosa							Animalia	Porifera	Demospongiae	Poecilosclerida	Myxillidae	Myxilla	lacunosa		species		Lambe, 1893
	imerss.org:PMLS:468					Andy Lamb								PRESENT				Aplysilla sp. nov.					iNaturalist:63646								Aplysilla							Animalia	Porifera	Demospongiae	Dendroceratida	Darwinellidae	Aplysilla			genus
	imerss.org:PMLS:469					Andy Lamb								PRESENT				Clathria (Microciona) pennata					iNaturalist:63672								Clathria (Microciona) pennata							Animalia	Porifera	Demospongiae	Poecilosclerida	Microcionidae	Clathria	pennata		species		(Lambe, 1895)
	imerss.org:PMLS:691					Andy Lamb								PRESENT				Leucilla nuttingi					iNaturalist:117713								Leucilla nuttingi							Animalia	Porifera	Calcarea	Leucosolenida	Amphoriscidae	Leucilla	nuttingi		species		(Urban, 1902)
	imerss.org:PMLS:692			Count: some		Andy Lamb								PRESENT				Craniella villosa					iNaturalist:459732								Craniella villosa							Animalia	Porifera	Demospongiae	Tetractinellida	Tetillidae	Craniella	villosa		species		Lambe, 1893
	imerss.org:PMLS:693					Andy Lamb		1						PRESENT				Suberites concinnus					iNaturalist:873889								Suberites concinnus							Animalia	Porifera	Demospongiae	Suberitida	Suberitidae	Suberites	concinnus		species		Lambe, 1895
	imerss.org:PMLS:694			Count: few		Andy Lamb								PRESENT				Semisuberites cribrosa					iNaturalist:194571								Semisuberites cribrosa							Animalia	Porifera	Demospongiae	Poecilosclerida	Esperiopsidae	Semisuberites	cribrosa		species		(Miklucho-Maclay, 1870)
	imerss.org:PMLS:695			Count: some		Andy Lamb								PRESENT				Amphilectus digitatus					iNaturalist:459874								Amphilectus digitatus							Animalia	Porifera	Demospongiae	Poecilosclerida	Esperiopsidae	Amphilectus	digitatus		species		(Miklucho-Maclay, 1870)
	imerss.org:PMLS:696			Count: abundant		Andy Lamb								PRESENT				Myxilla (Myxilla) lacunosa					iNaturalist:459826								Myxilla (Myxilla) lacunosa							Animalia	Porifera	Demospongiae	Poecilosclerida	Myxillidae	Myxilla	lacunosa		species		Lambe, 1893
	imerss.org:PMLS:697			Count: some		Andy Lamb								PRESENT				Clathria (Microciona) pennata					iNaturalist:63672								Clathria (Microciona) pennata							Animalia	Porifera	Demospongiae	Poecilosclerida	Microcionidae	Clathria	pennata		species		(Lambe, 1895)
	imerss.org:PMLS:698			Count: few		Andy Lamb								PRESENT				Antho (Plocamia) karykina					iNaturalist:345142								Antho (Plocamia) karykina							Animalia	Porifera	Demospongiae	Poecilosclerida	Microcionidae	Antho	karykina		species		(de Laubenfels, 1927)
	imerss.org:PMLS:699					Andy Lamb								PRESENT				Pachychalina sp.					iNaturalist:873877								Pachychalina							Animalia	Porifera	Demospongiae	Haplosclerida	Niphatidae	Pachychalina			genus
	imerss.org:PMLS:777					Charlie Gibbs								PRESENT				Craniella villosa					iNaturalist:459732								Craniella villosa							Animalia	Porifera	Demospongiae	Tetractinellida	Tetillidae	Craniella	villosa		species		Lambe, 1893
	imerss.org:PMLS:778					Charlie Gibbs								PRESENT				Cliona californiana					iNaturalist:424811								Cliona californiana							Animalia	Porifera	Demospongiae	Clionaida	Clionaidae	Cliona	californiana		species		de Laubenfels, 1932
	imerss.org:PMLS:779					Charlie Gibbs								PRESENT				Semisuberites cribrosa					iNaturalist:194571								Semisuberites cribrosa							Animalia	Porifera	Demospongiae	Poecilosclerida	Esperiopsidae	Semisuberites	cribrosa		species		(Miklucho-Maclay, 1870)
	imerss.org:PMLS:849					Charlie Gibbs								PRESENT				Hamigera sp.					iNaturalist:342247								Hamigera							Animalia	Porifera	Demospongiae	Poecilosclerida	Hymedesmiidae	Hamigera			genus
	imerss.org:PMLS:999					Andy Lamb		1						PRESENT				Leucandra heathi					iNaturalist:345357								Leucandra heathi							Animalia	Porifera	Calcarea	Leucosolenida	Grantiidae	Leucandra	heathi		species		Urban, 1906
	imerss.org:PMLS:1000			Count: few		Andy Lamb								PRESENT				Leucosolenia nautilia					iNaturalist:347319								Leucosolenia nautilia							Animalia	Porifera	Calcarea	Leucosolenida	Leucosoleniidae	Leucosolenia	nautilia		species		de Laubenfels, 1930
	imerss.org:PMLS:1001					Andy Lamb								PRESENT				Craniella villosa					iNaturalist:459732								Craniella villosa							Animalia	Porifera	Demospongiae	Tetractinellida	Tetillidae	Craniella	villosa		species		Lambe, 1893
	imerss.org:PMLS:1002			Count: few		Andy Lamb								PRESENT				Amphilectus digitatus					iNaturalist:459874								Amphilectus digitatus							Animalia	Porifera	Demospongiae	Poecilosclerida	Esperiopsidae	Amphilectus	digitatus		species		(Miklucho-Maclay, 1870)
	imerss.org:PMLS:1003			Count: few		Andy Lamb								PRESENT				Pachychalina sp.					iNaturalist:873877								Pachychalina							Animalia	Porifera	Demospongiae	Haplosclerida	Niphatidae	Pachychalina			genus
	imerss.org:PMLS:1004					Andy Lamb								PRESENT				Haliclona (Haliclona) sp.2					iNaturalist:1227087								Haliclona (Haliclona) sp.2							Animalia	Porifera	Demospongiae	Haplosclerida	Chalinidae	Haliclona	sp.2		species
	imerss.org:PMLS:1005			Count: some		Andy Lamb								PRESENT				Clathria (Microciona) pennata					iNaturalist:63672								Clathria (Microciona) pennata							Animalia	Porifera	Demospongiae	Poecilosclerida	Microcionidae	Clathria	pennata		species		(Lambe, 1895)
	imerss.org:PMLS:1098					Andy Lamb								PRESENT				Sycon spp.					iNaturalist:347738								Sycon							Animalia	Porifera	Calcarea	Leucosolenida	Sycettidae	Sycon			genus
	imerss.org:PMLS:1099			Count: few		Andy Lamb								PRESENT				Leucilla nuttingi					iNaturalist:117713								Leucilla nuttingi							Animalia	Porifera	Calcarea	Leucosolenida	Amphoriscidae	Leucilla	nuttingi		species		(Urban, 1902)
	imerss.org:PMLS:1100			Count: very many		Andy Lamb								PRESENT				Polymastia pachymastia					iNaturalist:117717								Polymastia pachymastia							Animalia	Porifera	Demospongiae	Polymastiida	Polymastiidae	Polymastia	pachymastia		species		de Laubenfels, 1932
	imerss.org:PMLS:1101					Andy Lamb								PRESENT				Clathria (Microciona) pennata					iNaturalist:63672								Clathria (Microciona) pennata							Animalia	Porifera	Demospongiae	Poecilosclerida	Microcionidae	Clathria	pennata		species		(Lambe, 1895)
	imerss.org:PMLS:1189			Count: abundant		Andy Lamb								PRESENT				Leucilla nuttingi					iNaturalist:117713								Leucilla nuttingi							Animalia	Porifera	Calcarea	Leucosolenida	Amphoriscidae	Leucilla	nuttingi		species		(Urban, 1902)
	imerss.org:PMLS:1190			Count: few		Andy Lamb								PRESENT				Craniella villosa					iNaturalist:459732								Craniella villosa							Animalia	Porifera	Demospongiae	Tetractinellida	Tetillidae	Craniella	villosa		species		Lambe, 1893
	imerss.org:PMLS:1191			Count: few		Andy Lamb								PRESENT				Cliona californiana					iNaturalist:424811								Cliona californiana							Animalia	Porifera	Demospongiae	Clionaida	Clionaidae	Cliona	californiana		species		de Laubenfels, 1932
	imerss.org:PMLS:1192			Count: many		Andy Lamb								PRESENT				Semisuberites cribrosa					iNaturalist:194571								Semisuberites cribrosa							Animalia	Porifera	Demospongiae	Poecilosclerida	Esperiopsidae	Semisuberites	cribrosa		species		(Miklucho-Maclay, 1870)
	imerss.org:PMLS:1193					Andy Lamb								PRESENT				Clathria (Microciona) pennata					iNaturalist:63672								Clathria (Microciona) pennata							Animalia	Porifera	Demospongiae	Poecilosclerida	Microcionidae	Clathria	pennata		species		(Lambe, 1895)
	imerss.org:PMLS:1205					Andy Lamb		1						PRESENT				Leucosolenia nautilia					iNaturalist:347319								Leucosolenia nautilia							Animalia	Porifera	Calcarea	Leucosolenida	Leucosoleniidae	Leucosolenia	nautilia		species		de Laubenfels, 1930
	imerss.org:PMLS:1206			Count: some		Andy Lamb								PRESENT				Leucilla nuttingi					iNaturalist:117713								Leucilla nuttingi							Animalia	Porifera	Calcarea	Leucosolenida	Amphoriscidae	Leucilla	nuttingi		species		(Urban, 1902)
	imerss.org:PMLS:1207			Count: few		Andy Lamb								PRESENT				Craniella villosa					iNaturalist:459732								Craniella villosa							Animalia	Porifera	Demospongiae	Tetractinellida	Tetillidae	Craniella	villosa		species		Lambe, 1893
	imerss.org:PMLS:1208					Andy Lamb								PRESENT				Cliona californiana					iNaturalist:424811								Cliona californiana							Animalia	Porifera	Demospongiae	Clionaida	Clionaidae	Cliona	californiana		species		de Laubenfels, 1932
	imerss.org:PMLS:1209			Count: few		Andy Lamb								PRESENT				Semisuberites cribrosa					iNaturalist:194571								Semisuberites cribrosa							Animalia	Porifera	Demospongiae	Poecilosclerida	Esperiopsidae	Semisuberites	cribrosa		species		(Miklucho-Maclay, 1870)
	imerss.org:PMLS:1210			Count: abundant		Andy Lamb								PRESENT				Myxilla (Myxilla) lacunosa					iNaturalist:459826								Myxilla (Myxilla) lacunosa							Animalia	Porifera	Demospongiae	Poecilosclerida	Myxillidae	Myxilla	lacunosa		species		Lambe, 1893
	imerss.org:PMLS:1211					Andy Lamb								PRESENT				Clathria (Microciona) pennata					iNaturalist:63672								Clathria (Microciona) pennata							Animalia	Porifera	Demospongiae	Poecilosclerida	Microcionidae	Clathria	pennata		species		(Lambe, 1895)
	imerss.org:PMLS:1212					Andy Lamb		1						PRESENT				Pachychalina sp.					iNaturalist:873877								Pachychalina							Animalia	Porifera	Demospongiae	Haplosclerida	Niphatidae	Pachychalina			genus
	imerss.org:PMLS:1213			Count: abundant		Andy Lamb								PRESENT				Aplysilla sp. nov.					iNaturalist:63646								Aplysilla							Animalia	Porifera	Demospongiae	Dendroceratida	Darwinellidae	Aplysilla			genus
	imerss.org:PMLS:1214					Andy Lamb								PRESENT				Haliclona (Haliclona) sp.2					iNaturalist:1227087								Haliclona (Haliclona) sp.2							Animalia	Porifera	Demospongiae	Haplosclerida	Chalinidae	Haliclona	sp.2		species
	imerss.org:PMLS:1372					Charlie Gibbs								PRESENT				Leucilla nuttingi					iNaturalist:117713								Leucilla nuttingi							Animalia	Porifera	Calcarea	Leucosolenida	Amphoriscidae	Leucilla	nuttingi		species		(Urban, 1902)
	imerss.org:PMLS:1373					Charlie Gibbs								PRESENT				Cliona californiana					iNaturalist:424811								Cliona californiana							Animalia	Porifera	Demospongiae	Clionaida	Clionaidae	Cliona	californiana		species		de Laubenfels, 1932
	imerss.org:PMLS:1374					Charlie Gibbs								PRESENT				Myxilla (Myxilla) lacunosa					iNaturalist:459826								Myxilla (Myxilla) lacunosa							Animalia	Porifera	Demospongiae	Poecilosclerida	Myxillidae	Myxilla	lacunosa		species		Lambe, 1893
	imerss.org:PMLS:1375					Charlie Gibbs								PRESENT				Clathria (Microciona) pennata					iNaturalist:63672								Clathria (Microciona) pennata							Animalia	Porifera	Demospongiae	Poecilosclerida	Microcionidae	Clathria	pennata		species		(Lambe, 1895)
	imerss.org:PMLS:1463					Charlie Gibbs								PRESENT				Leucilla nuttingi					iNaturalist:117713								Leucilla nuttingi							Animalia	Porifera	Calcarea	Leucosolenida	Amphoriscidae	Leucilla	nuttingi		species		(Urban, 1902)
	imerss.org:PMLS:1464					Charlie Gibbs								PRESENT				Cliona californiana					iNaturalist:424811								Cliona californiana							Animalia	Porifera	Demospongiae	Clionaida	Clionaidae	Cliona	californiana		species		de Laubenfels, 1932
	imerss.org:PMLS:1465					Charlie Gibbs								PRESENT				Clathria (Microciona) pennata					iNaturalist:63672								Clathria (Microciona) pennata							Animalia	Porifera	Demospongiae	Poecilosclerida	Microcionidae	Clathria	pennata		species		(Lambe, 1895)
	imerss.org:PMLS:1561					Charlie Gibbs								PRESENT				Semisuberites cribrosa					iNaturalist:194571								Semisuberites cribrosa							Animalia	Porifera	Demospongiae	Poecilosclerida	Esperiopsidae	Semisuberites	cribrosa		species		(Miklucho-Maclay, 1870)
	imerss.org:PMLS:1562					Charlie Gibbs								PRESENT				Clathria (Microciona) pennata					iNaturalist:63672								Clathria (Microciona) pennata							Animalia	Porifera	Demospongiae	Poecilosclerida	Microcionidae	Clathria	pennata		species		(Lambe, 1895)
	imerss.org:PMLS:1661					Charlie Gibbs								PRESENT				Leucilla nuttingi					iNaturalist:117713								Leucilla nuttingi							Animalia	Porifera	Calcarea	Leucosolenida	Amphoriscidae	Leucilla	nuttingi		species		(Urban, 1902)
	imerss.org:PMLS:1662					Charlie Gibbs								PRESENT				Clathria (Microciona) pennata					iNaturalist:63672								Clathria (Microciona) pennata							Animalia	Porifera	Demospongiae	Poecilosclerida	Microcionidae	Clathria	pennata		species		(Lambe, 1895)
	imerss.org:PMLS:1750					Charlie Gibbs								PRESENT				Clathria (Microciona) pennata					iNaturalist:63672								Clathria (Microciona) pennata							Animalia	Porifera	Demospongiae	Poecilosclerida	Microcionidae	Clathria	pennata		species		(Lambe, 1895)
	imerss.org:PMLS:1836					Charlie Gibbs								PRESENT				Clathria (Microciona) pennata					iNaturalist:63672								Clathria (Microciona) pennata							Animalia	Porifera	Demospongiae	Poecilosclerida	Microcionidae	Clathria	pennata		species		(Lambe, 1895)
	imerss.org:PMLS:1913					Charlie Gibbs								PRESENT				Clathria (Microciona) pennata					iNaturalist:63672								Clathria (Microciona) pennata							Animalia	Porifera	Demospongiae	Poecilosclerida	Microcionidae	Clathria	pennata		species		(Lambe, 1895)
	imerss.org:PMLS:1989					Charlie Gibbs								PRESENT				Craniella villosa					iNaturalist:459732								Craniella villosa							Animalia	Porifera	Demospongiae	Tetractinellida	Tetillidae	Craniella	villosa		species		Lambe, 1893
	imerss.org:PMLS:1990					Charlie Gibbs								PRESENT				Cliona californiana					iNaturalist:424811								Cliona californiana							Animalia	Porifera	Demospongiae	Clionaida	Clionaidae	Cliona	californiana		species		de Laubenfels, 1932
	imerss.org:PMLS:1991					Charlie Gibbs								PRESENT				Halichondria (Halichondria) bowerbanki					iNaturalist:120498								Halichondria (Halichondria) bowerbanki							Animalia	Porifera	Demospongiae	Suberitida	Halichondriidae	Halichondria	bowerbanki		species		Burton, 1930
	imerss.org:PMLS:1992					Charlie Gibbs								PRESENT				Clathria (Microciona) pennata					iNaturalist:63672								Clathria (Microciona) pennata							Animalia	Porifera	Demospongiae	Poecilosclerida	Microcionidae	Clathria	pennata		species		(Lambe, 1895)
	imerss.org:PMLS:2076					Charlie Gibbs								PRESENT				Leucilla nuttingi					iNaturalist:117713								Leucilla nuttingi							Animalia	Porifera	Calcarea	Leucosolenida	Amphoriscidae	Leucilla	nuttingi		species		(Urban, 1902)
	imerss.org:PMLS:2077					Charlie Gibbs								PRESENT				Cliona californiana					iNaturalist:424811								Cliona californiana							Animalia	Porifera	Demospongiae	Clionaida	Clionaidae	Cliona	californiana		species		de Laubenfels, 1932
	imerss.org:PMLS:2078					Charlie Gibbs								PRESENT				Clathria (Microciona) pennata					iNaturalist:63672								Clathria (Microciona) pennata							Animalia	Porifera	Demospongiae	Poecilosclerida	Microcionidae	Clathria	pennata		species		(Lambe, 1895)
	imerss.org:PMLS:2183					Charlie Gibbs								PRESENT				Leucilla nuttingi					iNaturalist:117713								Leucilla nuttingi							Animalia	Porifera	Calcarea	Leucosolenida	Amphoriscidae	Leucilla	nuttingi		species		(Urban, 1902)
	imerss.org:PMLS:2184					Charlie Gibbs								PRESENT				Cliona californiana					iNaturalist:424811								Cliona californiana							Animalia	Porifera	Demospongiae	Clionaida	Clionaidae	Cliona	californiana		species		de Laubenfels, 1932
	imerss.org:PMLS:2185					Charlie Gibbs								PRESENT				Halichondria (Halichondria) bowerbanki					iNaturalist:120498								Halichondria (Halichondria) bowerbanki							Animalia	Porifera	Demospongiae	Suberitida	Halichondriidae	Halichondria	bowerbanki		species		Burton, 1930
	imerss.org:PMLS:2186					Charlie Gibbs								PRESENT				Hamigera sp.					iNaturalist:342247								Hamigera							Animalia	Porifera	Demospongiae	Poecilosclerida	Hymedesmiidae	Hamigera			genus
	imerss.org:PMLS:2187					Charlie Gibbs								PRESENT				Clathria (Microciona) pennata					iNaturalist:63672								Clathria (Microciona) pennata							Animalia	Porifera	Demospongiae	Poecilosclerida	Microcionidae	Clathria	pennata		species		(Lambe, 1895)
	imerss.org:PMLS:2276					Charlie Gibbs								PRESENT				Leucilla nuttingi					iNaturalist:117713								Leucilla nuttingi							Animalia	Porifera	Calcarea	Leucosolenida	Amphoriscidae	Leucilla	nuttingi		species		(Urban, 1902)
	imerss.org:PMLS:2277					Charlie Gibbs								PRESENT				Cliona californiana					iNaturalist:424811								Cliona californiana							Animalia	Porifera	Demospongiae	Clionaida	Clionaidae	Cliona	californiana		species		de Laubenfels, 1932
	imerss.org:PMLS:2386					Charlie Gibbs								PRESENT				Leucilla nuttingi					iNaturalist:117713								Leucilla nuttingi							Animalia	Porifera	Calcarea	Leucosolenida	Amphoriscidae	Leucilla	nuttingi		species		(Urban, 1902)
	imerss.org:PMLS:2387					Charlie Gibbs								PRESENT				Clathria (Microciona) pennata					iNaturalist:63672								Clathria (Microciona) pennata							Animalia	Porifera	Demospongiae	Poecilosclerida	Microcionidae	Clathria	pennata		species		(Lambe, 1895)
	imerss.org:PMLS:2486					Charlie Gibbs								PRESENT				Clathria (Microciona) pennata					iNaturalist:63672								Clathria (Microciona) pennata							Animalia	Porifera	Demospongiae	Poecilosclerida	Microcionidae	Clathria	pennata		species		(Lambe, 1895)
	imerss.org:PMLS:2564					Charlie Gibbs								PRESENT				Leucilla nuttingi					iNaturalist:117713								Leucilla nuttingi							Animalia	Porifera	Calcarea	Leucosolenida	Amphoriscidae	Leucilla	nuttingi		species		(Urban, 1902)
	imerss.org:PMLS:2565					Charlie Gibbs								PRESENT				Craniella villosa					iNaturalist:459732								Craniella villosa							Animalia	Porifera	Demospongiae	Tetractinellida	Tetillidae	Craniella	villosa		species		Lambe, 1893
	imerss.org:PMLS:2566					Charlie Gibbs								PRESENT				Cliona californiana					iNaturalist:424811								Cliona californiana							Animalia	Porifera	Demospongiae	Clionaida	Clionaidae	Cliona	californiana		species		de Laubenfels, 1932
	imerss.org:PMLS:2567					Charlie Gibbs								PRESENT				Semisuberites cribrosa					iNaturalist:194571								Semisuberites cribrosa							Animalia	Porifera	Demospongiae	Poecilosclerida	Esperiopsidae	Semisuberites	cribrosa		species		(Miklucho-Maclay, 1870)
	imerss.org:PMLS:2568					Charlie Gibbs								PRESENT				Halichondria (Halichondria) bowerbanki					iNaturalist:120498								Halichondria (Halichondria) bowerbanki							Animalia	Porifera	Demospongiae	Suberitida	Halichondriidae	Halichondria	bowerbanki		species		Burton, 1930
	imerss.org:PMLS:2569					Charlie Gibbs								PRESENT				Clathria (Microciona) pennata					iNaturalist:63672								Clathria (Microciona) pennata							Animalia	Porifera	Demospongiae	Poecilosclerida	Microcionidae	Clathria	pennata		species		(Lambe, 1895)
	imerss.org:PMLS:2661					Charlie Gibbs								PRESENT				Clathria (Microciona) pennata					iNaturalist:63672								Clathria (Microciona) pennata							Animalia	Porifera	Demospongiae	Poecilosclerida	Microcionidae	Clathria	pennata		species		(Lambe, 1895)
	imerss.org:PMLS:2740					Donna Gibbs								PRESENT				Suberites concinnus					iNaturalist:873889								Suberites concinnus							Animalia	Porifera	Demospongiae	Suberitida	Suberitidae	Suberites	concinnus		species		Lambe, 1895
	imerss.org:PMLS:2741					Donna Gibbs								PRESENT				Pachychalina sp.					iNaturalist:873877								Pachychalina							Animalia	Porifera	Demospongiae	Haplosclerida	Niphatidae	Pachychalina			genus
	imerss.org:PMLS:2779					Andy Lamb		1						PRESENT				Sycon spp.					iNaturalist:347738								Sycon							Animalia	Porifera	Calcarea	Leucosolenida	Sycettidae	Sycon			genus
	imerss.org:PMLS:2780			Count: some		Andy Lamb								PRESENT				Cliona californiana					iNaturalist:424811								Cliona californiana							Animalia	Porifera	Demospongiae	Clionaida	Clionaidae	Cliona	californiana		species		de Laubenfels, 1932
	imerss.org:PMLS:2781			Count: few		Andy Lamb								PRESENT				Homaxinella amphispicula					iNaturalist:459847								Homaxinella amphispicula							Animalia	Porifera	Demospongiae	Suberitida	Suberitidae	Homaxinella	amphispicula		species		(de Laubenfels, 1961)
	imerss.org:PMLS:2782			Count: some		Andy Lamb								PRESENT				Clathria (Microciona) pennata					iNaturalist:63672								Clathria (Microciona) pennata							Animalia	Porifera	Demospongiae	Poecilosclerida	Microcionidae	Clathria	pennata		species		(Lambe, 1895)
	imerss.org:PMLS:2848					Charlie Gibbs								PRESENT				Sycon spp.					iNaturalist:347738								Sycon							Animalia	Porifera	Calcarea	Leucosolenida	Sycettidae	Sycon			genus
	imerss.org:PMLS:2849			Count: few		Charlie Gibbs								PRESENT				Leucilla nuttingi					iNaturalist:117713								Leucilla nuttingi							Animalia	Porifera	Calcarea	Leucosolenida	Amphoriscidae	Leucilla	nuttingi		species		(Urban, 1902)
	imerss.org:PMLS:2850					Charlie Gibbs		1						PRESENT				Leucosolenia nautilia					iNaturalist:347319								Leucosolenia nautilia							Animalia	Porifera	Calcarea	Leucosolenida	Leucosoleniidae	Leucosolenia	nautilia		species		de Laubenfels, 1930
	imerss.org:PMLS:2851					Charlie Gibbs		2						PRESENT				Craniella villosa					iNaturalist:459732								Craniella villosa							Animalia	Porifera	Demospongiae	Tetractinellida	Tetillidae	Craniella	villosa		species		Lambe, 1893
	imerss.org:PMLS:2852					Charlie Gibbs								PRESENT				Cliona californiana					iNaturalist:424811								Cliona californiana							Animalia	Porifera	Demospongiae	Clionaida	Clionaidae	Cliona	californiana		species		de Laubenfels, 1932
	imerss.org:PMLS:2853					Charlie Gibbs								PRESENT				Suberites concinnus					iNaturalist:873889								Suberites concinnus							Animalia	Porifera	Demospongiae	Suberitida	Suberitidae	Suberites	concinnus		species		Lambe, 1895
	imerss.org:PMLS:2854			Count: few		Charlie Gibbs								PRESENT				Amphilectus digitatus					iNaturalist:459874								Amphilectus digitatus							Animalia	Porifera	Demospongiae	Poecilosclerida	Esperiopsidae	Amphilectus	digitatus		species		(Miklucho-Maclay, 1870)
	imerss.org:PMLS:2855					Charlie Gibbs								PRESENT				Pachychalina sp.					iNaturalist:873877								Pachychalina							Animalia	Porifera	Demospongiae	Haplosclerida	Niphatidae	Pachychalina			genus
	imerss.org:PMLS:2856			Count: few		Charlie Gibbs								PRESENT				Myxilla (Myxilla) lacunosa					iNaturalist:459826								Myxilla (Myxilla) lacunosa							Animalia	Porifera	Demospongiae	Poecilosclerida	Myxillidae	Myxilla	lacunosa		species		Lambe, 1893
	imerss.org:PMLS:2857			Count: some		Charlie Gibbs								PRESENT				Haliclona (Haliclona) sp.2					iNaturalist:1227087								Haliclona (Haliclona) sp.2							Animalia	Porifera	Demospongiae	Haplosclerida	Chalinidae	Haliclona	sp.2		species
	imerss.org:PMLS:2858					Charlie Gibbs								PRESENT				Aplysilla sp. nov.					iNaturalist:63646								Aplysilla							Animalia	Porifera	Demospongiae	Dendroceratida	Darwinellidae	Aplysilla			genus
	imerss.org:PMLS:2859					Charlie Gibbs								PRESENT				Clathria (Microciona) pennata					iNaturalist:63672								Clathria (Microciona) pennata							Animalia	Porifera	Demospongiae	Poecilosclerida	Microcionidae	Clathria	pennata		species		(Lambe, 1895)
	imerss.org:PMLS:2860			Count: few		Charlie Gibbs								PRESENT				Myxilla (Myxilla) incrustans					iNaturalist:256019								Myxilla (Myxilla) incrustans							Animalia	Porifera	Demospongiae	Poecilosclerida	Myxillidae	Myxilla	incrustans		species		(Johnston, 1842)
	imerss.org:PMLS:2861			Count: few		Charlie Gibbs								PRESENT				Mycale (Aegogropila) adhaerens					iNaturalist:256010								Mycale (Aegogropila) adhaerens							Animalia	Porifera	Demospongiae	Poecilosclerida	Mycalidae	Mycale	adhaerens		species		(Lambe, 1893)
	imerss.org:PMLS:3002					Andy Lamb								PRESENT				Sycon spp.					iNaturalist:347738								Sycon							Animalia	Porifera	Calcarea	Leucosolenida	Sycettidae	Sycon			genus
	imerss.org:PMLS:3003					Andy Lamb								PRESENT				Cliona californiana					iNaturalist:424811								Cliona californiana							Animalia	Porifera	Demospongiae	Clionaida	Clionaidae	Cliona	californiana		species		de Laubenfels, 1932
	imerss.org:PMLS:3004					Andy Lamb								PRESENT				Halichondria (Halichondria) bowerbanki					iNaturalist:120498								Halichondria (Halichondria) bowerbanki							Animalia	Porifera	Demospongiae	Suberitida	Halichondriidae	Halichondria	bowerbanki		species		Burton, 1930
	imerss.org:PMLS:3005					Andy Lamb		2						PRESENT				Haliclona (Haliclona) sp.2					iNaturalist:1227087								Haliclona (Haliclona) sp.2							Animalia	Porifera	Demospongiae	Haplosclerida	Chalinidae	Haliclona	sp.2		species
	imerss.org:PMLS:3006			Count: abundant		Andy Lamb								PRESENT				Clathria (Microciona) pennata					iNaturalist:63672								Clathria (Microciona) pennata							Animalia	Porifera	Demospongiae	Poecilosclerida	Microcionidae	Clathria	pennata		species		(Lambe, 1895)
	imerss.org:PMLS:3111			Count: some		Andy Lamb								PRESENT				Cliona californiana					iNaturalist:424811								Cliona californiana							Animalia	Porifera	Demospongiae	Clionaida	Clionaidae	Cliona	californiana		species		de Laubenfels, 1932
	imerss.org:PMLS:3112			Count: few		Andy Lamb								PRESENT				Clathria (Microciona) pennata					iNaturalist:63672								Clathria (Microciona) pennata							Animalia	Porifera	Demospongiae	Poecilosclerida	Microcionidae	Clathria	pennata		species		(Lambe, 1895)
	imerss.org:PMLS:3113			Count: some		Andy Lamb								PRESENT				Haliclona (Haliclona) sp.2					iNaturalist:1227087								Haliclona (Haliclona) sp.2							Animalia	Porifera	Demospongiae	Haplosclerida	Chalinidae	Haliclona	sp.2		species
	imerss.org:PMLS:3177			Count: few		Andy Lamb								PRESENT				Craniella villosa					iNaturalist:459732								Craniella villosa							Animalia	Porifera	Demospongiae	Tetractinellida	Tetillidae	Craniella	villosa		species		Lambe, 1893
	imerss.org:PMLS:3178			Count: some		Andy Lamb								PRESENT				Cliona californiana					iNaturalist:424811								Cliona californiana							Animalia	Porifera	Demospongiae	Clionaida	Clionaidae	Cliona	californiana		species		de Laubenfels, 1932
	imerss.org:PMLS:3179			Count: some		Andy Lamb								PRESENT				Xestospongia hispida					iNaturalist:873856								Xestospongia hispida							Animalia	Porifera	Demospongiae	Haplosclerida	Petrosiidae	Xestospongia	hispida		species		(Ridley & Dendy, 1886)
	imerss.org:PMLS:3180			Count: abundant		Andy Lamb								PRESENT				Myxilla (Myxilla) lacunosa					iNaturalist:459826								Myxilla (Myxilla) lacunosa							Animalia	Porifera	Demospongiae	Poecilosclerida	Myxillidae	Myxilla	lacunosa		species		Lambe, 1893
	imerss.org:PMLS:3181			Count: some		Andy Lamb								PRESENT				Halichondria (Halichondria) bowerbanki					iNaturalist:120498								Halichondria (Halichondria) bowerbanki							Animalia	Porifera	Demospongiae	Suberitida	Halichondriidae	Halichondria	bowerbanki		species		Burton, 1930
	imerss.org:PMLS:3182			Count: very many		Andy Lamb								PRESENT				Aplysilla sp. nov.					iNaturalist:63646								Aplysilla							Animalia	Porifera	Demospongiae	Dendroceratida	Darwinellidae	Aplysilla			genus
	imerss.org:PMLS:3183			Count: very many		Andy Lamb								PRESENT				Clathria (Microciona) pennata					iNaturalist:63672								Clathria (Microciona) pennata							Animalia	Porifera	Demospongiae	Poecilosclerida	Microcionidae	Clathria	pennata		species		(Lambe, 1895)
	imerss.org:PMLS:3184			Count: few		Andy Lamb								PRESENT				Myxilla (Myxilla) incrustans					iNaturalist:256019								Myxilla (Myxilla) incrustans							Animalia	Porifera	Demospongiae	Poecilosclerida	Myxillidae	Myxilla	incrustans		species		(Johnston, 1842)
	imerss.org:PMLS:3303			Count: few		Andy Lamb								PRESENT				Cliona californiana					iNaturalist:424811								Cliona californiana							Animalia	Porifera	Demospongiae	Clionaida	Clionaidae	Cliona	californiana		species		de Laubenfels, 1932
	imerss.org:PMLS:3383			Count: many		Andy Lamb								PRESENT				Leucosolenia eleanor					iNaturalist:424817								Leucosolenia eleanor							Animalia	Porifera	Calcarea	Leucosolenida	Leucosoleniidae	Leucosolenia	eleanor		species		Urban, 1906
	imerss.org:PMLS:3384					Andy Lamb		1						PRESENT				Polymastia pachymastia					iNaturalist:117717								Polymastia pachymastia							Animalia	Porifera	Demospongiae	Polymastiida	Polymastiidae	Polymastia	pachymastia		species		de Laubenfels, 1932
	imerss.org:PMLS:3385			Count: some		Andy Lamb								PRESENT				Cliona californiana					iNaturalist:424811								Cliona californiana							Animalia	Porifera	Demospongiae	Clionaida	Clionaidae	Cliona	californiana		species		de Laubenfels, 1932
	imerss.org:PMLS:3386			Count: few		Andy Lamb								PRESENT				Clathria (Microciona) pennata					iNaturalist:63672								Clathria (Microciona) pennata							Animalia	Porifera	Demospongiae	Poecilosclerida	Microcionidae	Clathria	pennata		species		(Lambe, 1895)
	imerss.org:PMLS:3387			Count: some		Andy Lamb								PRESENT				Mycale (Aegogropila) adhaerens					iNaturalist:256010								Mycale (Aegogropila) adhaerens							Animalia	Porifera	Demospongiae	Poecilosclerida	Mycalidae	Mycale	adhaerens		species		(Lambe, 1893)
	imerss.org:PMLS:3515			Count: some		Andy Lamb								PRESENT				Cliona californiana					iNaturalist:424811								Cliona californiana							Animalia	Porifera	Demospongiae	Clionaida	Clionaidae	Cliona	californiana		species		de Laubenfels, 1932
	imerss.org:PMLS:3516			Count: few		Andy Lamb								PRESENT				Haliclona (Haliclona) sp.2					iNaturalist:1227087								Haliclona (Haliclona) sp.2							Animalia	Porifera	Demospongiae	Haplosclerida	Chalinidae	Haliclona	sp.2		species
	imerss.org:PMLS:3517			Count: some		Andy Lamb								PRESENT				Hamigera sp.					iNaturalist:342247								Hamigera							Animalia	Porifera	Demospongiae	Poecilosclerida	Hymedesmiidae	Hamigera			genus
	imerss.org:PMLS:3518			Count: some		Andy Lamb								PRESENT				Clathria (Microciona) pennata					iNaturalist:63672								Clathria (Microciona) pennata							Animalia	Porifera	Demospongiae	Poecilosclerida	Microcionidae	Clathria	pennata		species		(Lambe, 1895)
	imerss.org:PMLS:3662			Count: some		Andy Lamb								PRESENT				Cliona californiana					iNaturalist:424811								Cliona californiana							Animalia	Porifera	Demospongiae	Clionaida	Clionaidae	Cliona	californiana		species		de Laubenfels, 1932
	imerss.org:PMLS:3663			Count: very many		Andy Lamb								PRESENT				Clathria (Microciona) pennata					iNaturalist:63672								Clathria (Microciona) pennata							Animalia	Porifera	Demospongiae	Poecilosclerida	Microcionidae	Clathria	pennata		species		(Lambe, 1895)
	imerss.org:PMLS:3773			Count: many		Andy Lamb								PRESENT				Cliona californiana					iNaturalist:424811								Cliona californiana							Animalia	Porifera	Demospongiae	Clionaida	Clionaidae	Cliona	californiana		species		de Laubenfels, 1932
	imerss.org:PMLS:3774					Andy Lamb		1						PRESENT				Halichondria (Halichondria) bowerbanki					iNaturalist:120498								Halichondria (Halichondria) bowerbanki							Animalia	Porifera	Demospongiae	Suberitida	Halichondriidae	Halichondria	bowerbanki		species		Burton, 1930
	imerss.org:PMLS:3775			Count: few		Andy Lamb								PRESENT				Clathria (Microciona) pennata					iNaturalist:63672								Clathria (Microciona) pennata							Animalia	Porifera	Demospongiae	Poecilosclerida	Microcionidae	Clathria	pennata		species		(Lambe, 1895)
	imerss.org:PMLS:3890			Count: abundant		Andy Lamb								PRESENT				Cliona californiana					iNaturalist:424811								Cliona californiana							Animalia	Porifera	Demospongiae	Clionaida	Clionaidae	Cliona	californiana		species		de Laubenfels, 1932
	imerss.org:PMLS:3891			Count: some		Andy Lamb								PRESENT				Myxilla (Myxilla) lacunosa					iNaturalist:459826								Myxilla (Myxilla) lacunosa							Animalia	Porifera	Demospongiae	Poecilosclerida	Myxillidae	Myxilla	lacunosa		species		Lambe, 1893
	imerss.org:PMLS:3892			Count: many		Andy Lamb								PRESENT				Haliclona (Haliclona) sp.2					iNaturalist:1227087								Haliclona (Haliclona) sp.2							Animalia	Porifera	Demospongiae	Haplosclerida	Chalinidae	Haliclona	sp.2		species
	imerss.org:PMLS:3893			Count: few		Andy Lamb								PRESENT				Pleraplysilla sp. nov.					iNaturalist:623055								Pleraplysilla							Animalia	Porifera	Demospongiae	Dictyoceratida	Dysideidae	Pleraplysilla			genus
	imerss.org:PMLS:3894			Count: abundant		Andy Lamb								PRESENT				Clathria (Microciona) pennata					iNaturalist:63672								Clathria (Microciona) pennata							Animalia	Porifera	Demospongiae	Poecilosclerida	Microcionidae	Clathria	pennata		species		(Lambe, 1895)
	imerss.org:PMLS:3985					Andy Lamb		2						PRESENT				Craniella villosa					iNaturalist:459732								Craniella villosa							Animalia	Porifera	Demospongiae	Tetractinellida	Tetillidae	Craniella	villosa		species		Lambe, 1893
	imerss.org:PMLS:3986			Count: few		Andy Lamb								PRESENT				Cliona californiana					iNaturalist:424811								Cliona californiana							Animalia	Porifera	Demospongiae	Clionaida	Clionaidae	Cliona	californiana		species		de Laubenfels, 1932
	imerss.org:PMLS:3987					Andy Lamb		2						PRESENT				Haliclona (Haliclona) sp.1					iNaturalist:1227076								Haliclona (Haliclona) sp.1							Animalia	Porifera	Demospongiae	Haplosclerida	Chalinidae	Haliclona	sp.1		species
	imerss.org:PMLS:3988			Count: few		Andy Lamb								PRESENT				Haliclona (Haliclona) sp.2					iNaturalist:1227087								Haliclona (Haliclona) sp.2							Animalia	Porifera	Demospongiae	Haplosclerida	Chalinidae	Haliclona	sp.2		species
	imerss.org:PMLS:3989			Count: some		Andy Lamb								PRESENT				Myxilla (Myxilla) incrustans					iNaturalist:256019								Myxilla (Myxilla) incrustans							Animalia	Porifera	Demospongiae	Poecilosclerida	Myxillidae	Myxilla	incrustans		species		(Johnston, 1842)
	imerss.org:PMLS:3990			Count: some		Andy Lamb								PRESENT				Mycale (Aegogropila) adhaerens					iNaturalist:256010								Mycale (Aegogropila) adhaerens							Animalia	Porifera	Demospongiae	Poecilosclerida	Mycalidae	Mycale	adhaerens		species		(Lambe, 1893)
	imerss.org:PMLS:4097					Andy Lamb		1						PRESENT				Leucosolenia nautilia					iNaturalist:347319								Leucosolenia nautilia							Animalia	Porifera	Calcarea	Leucosolenida	Leucosoleniidae	Leucosolenia	nautilia		species		de Laubenfels, 1930
	imerss.org:PMLS:4098			Count: few		Andy Lamb								PRESENT				Cliona californiana					iNaturalist:424811								Cliona californiana							Animalia	Porifera	Demospongiae	Clionaida	Clionaidae	Cliona	californiana		species		de Laubenfels, 1932
	imerss.org:PMLS:4099			Count: few		Andy Lamb								PRESENT				Haliclona (Haliclona) sp.2					iNaturalist:1227087								Haliclona (Haliclona) sp.2							Animalia	Porifera	Demospongiae	Haplosclerida	Chalinidae	Haliclona	sp.2		species
	imerss.org:PMLS:4100			Count: some		Andy Lamb								PRESENT				Clathria (Microciona) pennata					iNaturalist:63672								Clathria (Microciona) pennata							Animalia	Porifera	Demospongiae	Poecilosclerida	Microcionidae	Clathria	pennata		species		(Lambe, 1895)
	imerss.org:PMLS:4101			Count: some		Andy Lamb								PRESENT				Myxilla (Myxilla) incrustans					iNaturalist:256019								Myxilla (Myxilla) incrustans							Animalia	Porifera	Demospongiae	Poecilosclerida	Myxillidae	Myxilla	incrustans		species		(Johnston, 1842)
	imerss.org:PMLS:4102			Count: some		Andy Lamb								PRESENT				Mycale (Aegogropila) adhaerens					iNaturalist:256010								Mycale (Aegogropila) adhaerens							Animalia	Porifera	Demospongiae	Poecilosclerida	Mycalidae	Mycale	adhaerens		species		(Lambe, 1893)
	imerss.org:PMLS:4212			Count: very many		Andy Lamb								PRESENT				Cliona californiana					iNaturalist:424811								Cliona californiana							Animalia	Porifera	Demospongiae	Clionaida	Clionaidae	Cliona	californiana		species		de Laubenfels, 1932
	imerss.org:PMLS:4213			Count: very many		Andy Lamb								PRESENT				Clathria (Microciona) pennata					iNaturalist:63672								Clathria (Microciona) pennata							Animalia	Porifera	Demospongiae	Poecilosclerida	Microcionidae	Clathria	pennata		species		(Lambe, 1895)
	imerss.org:PMLS:4325			Count: some		Andy Lamb								PRESENT				Cliona californiana					iNaturalist:424811								Cliona californiana							Animalia	Porifera	Demospongiae	Clionaida	Clionaidae	Cliona	californiana		species		de Laubenfels, 1932
	imerss.org:PMLS:4326			Count: many		Andy Lamb								PRESENT				Clathria (Microciona) pennata					iNaturalist:63672								Clathria (Microciona) pennata							Animalia	Porifera	Demospongiae	Poecilosclerida	Microcionidae	Clathria	pennata		species		(Lambe, 1895)
	imerss.org:PMLS:4327			Count: some		Andy Lamb								PRESENT				Myxilla (Myxilla) incrustans					iNaturalist:256019								Myxilla (Myxilla) incrustans							Animalia	Porifera	Demospongiae	Poecilosclerida	Myxillidae	Myxilla	incrustans		species		(Johnston, 1842)
	imerss.org:PMLS:4328			Count: some		Andy Lamb								PRESENT				Mycale (Aegogropila) adhaerens					iNaturalist:256010								Mycale (Aegogropila) adhaerens							Animalia	Porifera	Demospongiae	Poecilosclerida	Mycalidae	Mycale	adhaerens		species		(Lambe, 1893)
	imerss.org:PMLS:4503			Count: some		Charlie Gibbs								PRESENT				Clathria (Microciona) pennata					iNaturalist:63672								Clathria (Microciona) pennata							Animalia	Porifera	Demospongiae	Poecilosclerida	Microcionidae	Clathria	pennata		species		(Lambe, 1895)
	imerss.org:PMLS:4561			Count: few		Andy Lamb								PRESENT				Cliona californiana					iNaturalist:424811								Cliona californiana							Animalia	Porifera	Demospongiae	Clionaida	Clionaidae	Cliona	californiana		species		de Laubenfels, 1932
	imerss.org:PMLS:4562					Andy Lamb		1						PRESENT				Haliclona (Haliclona) sp.2					iNaturalist:1227087								Haliclona (Haliclona) sp.2							Animalia	Porifera	Demospongiae	Haplosclerida	Chalinidae	Haliclona	sp.2		species
	imerss.org:PMLS:4606			Count: some		Andy Lamb								PRESENT				Leucosolenia nautilia					iNaturalist:347319								Leucosolenia nautilia							Animalia	Porifera	Calcarea	Leucosolenida	Leucosoleniidae	Leucosolenia	nautilia		species		de Laubenfels, 1930
	imerss.org:PMLS:4607			Count: few		Andy Lamb								PRESENT				Cliona californiana					iNaturalist:424811								Cliona californiana							Animalia	Porifera	Demospongiae	Clionaida	Clionaidae	Cliona	californiana		species		de Laubenfels, 1932
	imerss.org:PMLS:4608			Count: some		Andy Lamb								PRESENT				Clathria (Microciona) pennata					iNaturalist:63672								Clathria (Microciona) pennata							Animalia	Porifera	Demospongiae	Poecilosclerida	Microcionidae	Clathria	pennata		species		(Lambe, 1895)
	imerss.org:PMLS:4609					Andy Lamb		1						PRESENT				Mycale (Aegogropila) adhaerens					iNaturalist:256010								Mycale (Aegogropila) adhaerens							Animalia	Porifera	Demospongiae	Poecilosclerida	Mycalidae	Mycale	adhaerens		species		(Lambe, 1893)
	imerss.org:PMLS:4711			Count: some		Andy Lamb								PRESENT				Cliona californiana					iNaturalist:424811								Cliona californiana							Animalia	Porifera	Demospongiae	Clionaida	Clionaidae	Cliona	californiana		species		de Laubenfels, 1932
	imerss.org:PMLS:4712			Count: some		Andy Lamb								PRESENT				Myxilla (Myxilla) lacunosa					iNaturalist:459826								Myxilla (Myxilla) lacunosa							Animalia	Porifera	Demospongiae	Poecilosclerida	Myxillidae	Myxilla	lacunosa		species		Lambe, 1893
	imerss.org:PMLS:4713			Count: very many		Andy Lamb								PRESENT				Haliclona (Haliclona) sp.2					iNaturalist:1227087								Haliclona (Haliclona) sp.2							Animalia	Porifera	Demospongiae	Haplosclerida	Chalinidae	Haliclona	sp.2		species
	imerss.org:PMLS:4714			Count: very many		Andy Lamb								PRESENT				Clathria (Microciona) pennata					iNaturalist:63672								Clathria (Microciona) pennata							Animalia	Porifera	Demospongiae	Poecilosclerida	Microcionidae	Clathria	pennata		species		(Lambe, 1895)
	imerss.org:PMLS:4715			Count: some		Andy Lamb								PRESENT				Myxilla (Myxilla) incrustans					iNaturalist:256019								Myxilla (Myxilla) incrustans							Animalia	Porifera	Demospongiae	Poecilosclerida	Myxillidae	Myxilla	incrustans		species		(Johnston, 1842)
	imerss.org:PMLS:4838			Count: some		Andy Lamb								PRESENT				Polymastia pachymastia					iNaturalist:117717								Polymastia pachymastia							Animalia	Porifera	Demospongiae	Polymastiida	Polymastiidae	Polymastia	pachymastia		species		de Laubenfels, 1932
	imerss.org:PMLS:4839			Count: some		Andy Lamb								PRESENT				Cliona californiana					iNaturalist:424811								Cliona californiana							Animalia	Porifera	Demospongiae	Clionaida	Clionaidae	Cliona	californiana		species		de Laubenfels, 1932
	imerss.org:PMLS:4840			Count: some		Andy Lamb								PRESENT				Homaxinella amphispicula					iNaturalist:459847								Homaxinella amphispicula							Animalia	Porifera	Demospongiae	Suberitida	Suberitidae	Homaxinella	amphispicula		species		(de Laubenfels, 1961)
	imerss.org:PMLS:4841					Andy Lamb		3						PRESENT				Myxilla (Myxilla) lacunosa					iNaturalist:459826								Myxilla (Myxilla) lacunosa							Animalia	Porifera	Demospongiae	Poecilosclerida	Myxillidae	Myxilla	lacunosa		species		Lambe, 1893
	imerss.org:PMLS:4842			Count: some		Andy Lamb								PRESENT				Clathria (Microciona) pennata					iNaturalist:63672								Clathria (Microciona) pennata							Animalia	Porifera	Demospongiae	Poecilosclerida	Microcionidae	Clathria	pennata		species		(Lambe, 1895)
	imerss.org:PMLS:4843			Count: few		Andy Lamb								PRESENT				Mycale (Aegogropila) adhaerens					iNaturalist:256010								Mycale (Aegogropila) adhaerens							Animalia	Porifera	Demospongiae	Poecilosclerida	Mycalidae	Mycale	adhaerens		species		(Lambe, 1893)
	imerss.org:PMLS:4943			Count: some		Andy Lamb								PRESENT				Cliona californiana					iNaturalist:424811								Cliona californiana							Animalia	Porifera	Demospongiae	Clionaida	Clionaidae	Cliona	californiana		species		de Laubenfels, 1932
	imerss.org:PMLS:4944					Andy Lamb		1						PRESENT				Haliclona (Haliclona) sp.1					iNaturalist:1227076								Haliclona (Haliclona) sp.1							Animalia	Porifera	Demospongiae	Haplosclerida	Chalinidae	Haliclona	sp.1		species
	imerss.org:PMLS:4945					Andy Lamb		2						PRESENT				Myxilla (Myxilla) lacunosa					iNaturalist:459826								Myxilla (Myxilla) lacunosa							Animalia	Porifera	Demospongiae	Poecilosclerida	Myxillidae	Myxilla	lacunosa		species		Lambe, 1893
	imerss.org:PMLS:4946			Count: some		Andy Lamb								PRESENT				Clathria (Microciona) pennata					iNaturalist:63672								Clathria (Microciona) pennata							Animalia	Porifera	Demospongiae	Poecilosclerida	Microcionidae	Clathria	pennata		species		(Lambe, 1895)
	imerss.org:PMLS:5040			Count: some		Andy Lamb								PRESENT				Cliona californiana					iNaturalist:424811								Cliona californiana							Animalia	Porifera	Demospongiae	Clionaida	Clionaidae	Cliona	californiana		species		de Laubenfels, 1932
	imerss.org:PMLS:5041			Count: some		Andy Lamb								PRESENT				Clathria (Microciona) pennata					iNaturalist:63672								Clathria (Microciona) pennata							Animalia	Porifera	Demospongiae	Poecilosclerida	Microcionidae	Clathria	pennata		species		(Lambe, 1895)
	imerss.org:PMLS:5042			Count: few		Andy Lamb								PRESENT				Myxilla (Myxilla) incrustans					iNaturalist:256019								Myxilla (Myxilla) incrustans							Animalia	Porifera	Demospongiae	Poecilosclerida	Myxillidae	Myxilla	incrustans		species		(Johnston, 1842)
	imerss.org:PMLS:5043			Count: few		Andy Lamb								PRESENT				Mycale (Aegogropila) adhaerens					iNaturalist:256010								Mycale (Aegogropila) adhaerens							Animalia	Porifera	Demospongiae	Poecilosclerida	Mycalidae	Mycale	adhaerens		species		(Lambe, 1893)
	imerss.org:PMLS:5162					Andy Lamb		1						PRESENT				Weberella perlucida					iNaturalist:424640								Weberella perlucida							Animalia	Porifera	Demospongiae	Polymastiida	Polymastiidae	Weberella	perlucida		species		Austin, Ott, Reiswig, Romagosa & McDaniel, 2014
	imerss.org:PMLS:5163			Count: very many		Andy Lamb								PRESENT				Cliona californiana					iNaturalist:424811								Cliona californiana							Animalia	Porifera	Demospongiae	Clionaida	Clionaidae	Cliona	californiana		species		de Laubenfels, 1932
	imerss.org:PMLS:5164					Andy Lamb		1						PRESENT				Xestospongia hispida					iNaturalist:873856								Xestospongia hispida							Animalia	Porifera	Demospongiae	Haplosclerida	Petrosiidae	Xestospongia	hispida		species		(Ridley & Dendy, 1886)
	imerss.org:PMLS:5165			Count: very many		Andy Lamb								PRESENT				Myxilla (Myxilla) lacunosa					iNaturalist:459826								Myxilla (Myxilla) lacunosa							Animalia	Porifera	Demospongiae	Poecilosclerida	Myxillidae	Myxilla	lacunosa		species		Lambe, 1893
	imerss.org:PMLS:5166					Andy Lamb		1						PRESENT				Haliclona (Haliclona) sp.2					iNaturalist:1227087								Haliclona (Haliclona) sp.2							Animalia	Porifera	Demospongiae	Haplosclerida	Chalinidae	Haliclona	sp.2		species
	imerss.org:PMLS:5167			Count: many		Andy Lamb								PRESENT				Aplysilla sp. nov.					iNaturalist:63646								Aplysilla							Animalia	Porifera	Demospongiae	Dendroceratida	Darwinellidae	Aplysilla			genus
	imerss.org:PMLS:5168			Count: very many		Andy Lamb								PRESENT				Clathria (Microciona) pennata					iNaturalist:63672								Clathria (Microciona) pennata							Animalia	Porifera	Demospongiae	Poecilosclerida	Microcionidae	Clathria	pennata		species		(Lambe, 1895)
	imerss.org:PMLS:5169			Count: few		Andy Lamb								PRESENT				Myxilla (Myxilla) incrustans					iNaturalist:256019								Myxilla (Myxilla) incrustans							Animalia	Porifera	Demospongiae	Poecilosclerida	Myxillidae	Myxilla	incrustans		species		(Johnston, 1842)
	imerss.org:PMLS:5277			Count: few		Andy Lamb								PRESENT				Mycale (Aegogropila) adhaerens					iNaturalist:256010								Mycale (Aegogropila) adhaerens							Animalia	Porifera	Demospongiae	Poecilosclerida	Mycalidae	Mycale	adhaerens		species		(Lambe, 1893)
	imerss.org:PMLS:5283			Count: some		Andy Lamb								PRESENT				Cliona californiana					iNaturalist:424811								Cliona californiana							Animalia	Porifera	Demospongiae	Clionaida	Clionaidae	Cliona	californiana		species		de Laubenfels, 1932
	imerss.org:PMLS:5284			Count: many		Andy Lamb								PRESENT				Clathria (Microciona) pennata					iNaturalist:63672								Clathria (Microciona) pennata							Animalia	Porifera	Demospongiae	Poecilosclerida	Microcionidae	Clathria	pennata		species		(Lambe, 1895)
	imerss.org:PMLS:5285			Count: few		Andy Lamb								PRESENT				Mycale (Aegogropila) adhaerens					iNaturalist:256010								Mycale (Aegogropila) adhaerens							Animalia	Porifera	Demospongiae	Poecilosclerida	Mycalidae	Mycale	adhaerens		species		(Lambe, 1893)
	imerss.org:PMLS:5364			Count: many		Andy Lamb								PRESENT				Cliona californiana					iNaturalist:424811								Cliona californiana							Animalia	Porifera	Demospongiae	Clionaida	Clionaidae	Cliona	californiana		species		de Laubenfels, 1932
	imerss.org:PMLS:5365			Count: some		Andy Lamb								PRESENT				Clathria (Microciona) pennata					iNaturalist:63672								Clathria (Microciona) pennata							Animalia	Porifera	Demospongiae	Poecilosclerida	Microcionidae	Clathria	pennata		species		(Lambe, 1895)
	imerss.org:PMLS:5366			Count: few		Andy Lamb								PRESENT				Myxilla (Myxilla) incrustans					iNaturalist:256019								Myxilla (Myxilla) incrustans							Animalia	Porifera	Demospongiae	Poecilosclerida	Myxillidae	Myxilla	incrustans		species		(Johnston, 1842)
	imerss.org:PMLS:5367			Count: few		Andy Lamb								PRESENT				Mycale (Aegogropila) adhaerens					iNaturalist:256010								Mycale (Aegogropila) adhaerens							Animalia	Porifera	Demospongiae	Poecilosclerida	Mycalidae	Mycale	adhaerens		species		(Lambe, 1893)
	imerss.org:PMLS:5472					Andy Lamb		2						PRESENT				Craniella villosa					iNaturalist:459732								Craniella villosa							Animalia	Porifera	Demospongiae	Tetractinellida	Tetillidae	Craniella	villosa		species		Lambe, 1893
	imerss.org:PMLS:5473			Count: very many		Andy Lamb								PRESENT				Cliona californiana					iNaturalist:424811								Cliona californiana							Animalia	Porifera	Demospongiae	Clionaida	Clionaidae	Cliona	californiana		species		de Laubenfels, 1932
	imerss.org:PMLS:5474					Andy Lamb		1						PRESENT				Halichondria (Eumastia) sitiens					iNaturalist:459775								Halichondria (Eumastia) sitiens							Animalia	Porifera	Demospongiae	Suberitida	Halichondriidae	Halichondria	sitiens		species		(Schmidt, 1870)
	imerss.org:PMLS:5563			Count: very many		Andy Lamb								PRESENT				Polymastia pachymastia					iNaturalist:117717								Polymastia pachymastia							Animalia	Porifera	Demospongiae	Polymastiida	Polymastiidae	Polymastia	pachymastia		species		de Laubenfels, 1932
	imerss.org:PMLS:5564			Count: some		Andy Lamb								PRESENT				Cliona californiana					iNaturalist:424811								Cliona californiana							Animalia	Porifera	Demospongiae	Clionaida	Clionaidae	Cliona	californiana		species		de Laubenfels, 1932
	imerss.org:PMLS:5565					Andy Lamb		3						PRESENT				Suberites latus					iNaturalist:473057								Suberites latus							Animalia	Porifera	Demospongiae	Suberitida	Suberitidae	Suberites	latus		species		Lambe, 1893
	imerss.org:PMLS:5566					Andy Lamb		1						PRESENT				Hamigera sp.					iNaturalist:342247								Hamigera							Animalia	Porifera	Demospongiae	Poecilosclerida	Hymedesmiidae	Hamigera			genus
	imerss.org:PMLS:5567			Count: some		Andy Lamb								PRESENT				Clathria (Microciona) pennata					iNaturalist:63672								Clathria (Microciona) pennata							Animalia	Porifera	Demospongiae	Poecilosclerida	Microcionidae	Clathria	pennata		species		(Lambe, 1895)
	imerss.org:PMLS:5568			Count: few		Andy Lamb								PRESENT				Mycale (Aegogropila) adhaerens					iNaturalist:256010								Mycale (Aegogropila) adhaerens							Animalia	Porifera	Demospongiae	Poecilosclerida	Mycalidae	Mycale	adhaerens		species		(Lambe, 1893)
	imerss.org:PMLS:5641			Count: some		Andy Lamb								PRESENT				Cliona californiana					iNaturalist:424811								Cliona californiana							Animalia	Porifera	Demospongiae	Clionaida	Clionaidae	Cliona	californiana		species		de Laubenfels, 1932
	imerss.org:PMLS:5642					Andy Lamb		1						PRESENT				Myxilla (Myxilla) lacunosa					iNaturalist:459826								Myxilla (Myxilla) lacunosa							Animalia	Porifera	Demospongiae	Poecilosclerida	Myxillidae	Myxilla	lacunosa		species		Lambe, 1893
	imerss.org:PMLS:5643			Count: some		Andy Lamb								PRESENT				Clathria (Microciona) pennata					iNaturalist:63672								Clathria (Microciona) pennata							Animalia	Porifera	Demospongiae	Poecilosclerida	Microcionidae	Clathria	pennata		species		(Lambe, 1895)
	imerss.org:PMLS:5644			Count: few		Andy Lamb								PRESENT				Myxilla (Myxilla) incrustans					iNaturalist:256019								Myxilla (Myxilla) incrustans							Animalia	Porifera	Demospongiae	Poecilosclerida	Myxillidae	Myxilla	incrustans		species		(Johnston, 1842)
	imerss.org:PMLS:5645			Count: few		Andy Lamb								PRESENT				Mycale (Aegogropila) adhaerens					iNaturalist:256010								Mycale (Aegogropila) adhaerens							Animalia	Porifera	Demospongiae	Poecilosclerida	Mycalidae	Mycale	adhaerens		species		(Lambe, 1893)
	imerss.org:PMLS:5742					Andy Lamb		1						PRESENT				Craniella villosa					iNaturalist:459732								Craniella villosa							Animalia	Porifera	Demospongiae	Tetractinellida	Tetillidae	Craniella	villosa		species		Lambe, 1893
	imerss.org:PMLS:5743			Count: many		Andy Lamb								PRESENT				Cliona californiana					iNaturalist:424811								Cliona californiana							Animalia	Porifera	Demospongiae	Clionaida	Clionaidae	Cliona	californiana		species		de Laubenfels, 1932
	imerss.org:PMLS:5744			Count: some		Andy Lamb								PRESENT				Myxilla (Myxilla) lacunosa					iNaturalist:459826								Myxilla (Myxilla) lacunosa							Animalia	Porifera	Demospongiae	Poecilosclerida	Myxillidae	Myxilla	lacunosa		species		Lambe, 1893
	imerss.org:PMLS:5745			Count: few		Andy Lamb								PRESENT				Haliclona (Haliclona) sp.2					iNaturalist:1227087								Haliclona (Haliclona) sp.2							Animalia	Porifera	Demospongiae	Haplosclerida	Chalinidae	Haliclona	sp.2		species
	imerss.org:PMLS:5746			Count: few		Andy Lamb								PRESENT				Hamigera sp.					iNaturalist:342247								Hamigera							Animalia	Porifera	Demospongiae	Poecilosclerida	Hymedesmiidae	Hamigera			genus
	imerss.org:PMLS:5747			Count: many		Andy Lamb								PRESENT				Clathria (Microciona) pennata					iNaturalist:63672								Clathria (Microciona) pennata							Animalia	Porifera	Demospongiae	Poecilosclerida	Microcionidae	Clathria	pennata		species		(Lambe, 1895)
	imerss.org:PMLS:5836			Count: some		Andy Lamb								PRESENT				Cliona californiana					iNaturalist:424811								Cliona californiana							Animalia	Porifera	Demospongiae	Clionaida	Clionaidae	Cliona	californiana		species		de Laubenfels, 1932
	imerss.org:PMLS:5837			Count: few		Andy Lamb								PRESENT				Semisuberites cribrosa					iNaturalist:194571								Semisuberites cribrosa							Animalia	Porifera	Demospongiae	Poecilosclerida	Esperiopsidae	Semisuberites	cribrosa		species		(Miklucho-Maclay, 1870)
	imerss.org:PMLS:5838			Count: few		Andy Lamb								PRESENT				Myxilla (Myxilla) lacunosa					iNaturalist:459826								Myxilla (Myxilla) lacunosa							Animalia	Porifera	Demospongiae	Poecilosclerida	Myxillidae	Myxilla	lacunosa		species		Lambe, 1893
	imerss.org:PMLS:5839			Count: few		Andy Lamb								PRESENT				Haliclona (Haliclona) sp.2					iNaturalist:1227087								Haliclona (Haliclona) sp.2							Animalia	Porifera	Demospongiae	Haplosclerida	Chalinidae	Haliclona	sp.2		species
	imerss.org:PMLS:5840			Count: few		Andy Lamb								PRESENT				Hamigera sp.					iNaturalist:342247								Hamigera							Animalia	Porifera	Demospongiae	Poecilosclerida	Hymedesmiidae	Hamigera			genus
	imerss.org:PMLS:5841			Count: many		Andy Lamb								PRESENT				Clathria (Microciona) pennata					iNaturalist:63672								Clathria (Microciona) pennata							Animalia	Porifera	Demospongiae	Poecilosclerida	Microcionidae	Clathria	pennata		species		(Lambe, 1895)
	imerss.org:PMLS:5842			Count: few		Andy Lamb								PRESENT				Myxilla (Myxilla) incrustans					iNaturalist:256019								Myxilla (Myxilla) incrustans							Animalia	Porifera	Demospongiae	Poecilosclerida	Myxillidae	Myxilla	incrustans		species		(Johnston, 1842)
	imerss.org:PMLS:5843			Count: few		Andy Lamb								PRESENT				Mycale (Aegogropila) adhaerens					iNaturalist:256010								Mycale (Aegogropila) adhaerens							Animalia	Porifera	Demospongiae	Poecilosclerida	Mycalidae	Mycale	adhaerens		species		(Lambe, 1893)
	imerss.org:PMLS:5967			Count: abundant		Andy Lamb								PRESENT				Cliona californiana					iNaturalist:424811								Cliona californiana							Animalia	Porifera	Demospongiae	Clionaida	Clionaidae	Cliona	californiana		species		de Laubenfels, 1932
	imerss.org:PMLS:5968			Count: abundant		Andy Lamb								PRESENT				Myxilla (Myxilla) lacunosa					iNaturalist:459826								Myxilla (Myxilla) lacunosa							Animalia	Porifera	Demospongiae	Poecilosclerida	Myxillidae	Myxilla	lacunosa		species		Lambe, 1893
	imerss.org:PMLS:5969			Count: very many		Andy Lamb								PRESENT				Halichondria (Halichondria) bowerbanki					iNaturalist:120498								Halichondria (Halichondria) bowerbanki							Animalia	Porifera	Demospongiae	Suberitida	Halichondriidae	Halichondria	bowerbanki		species		Burton, 1930
	imerss.org:PMLS:5970			Count: many		Andy Lamb								PRESENT				Haliclona (Haliclona) sp.2					iNaturalist:1227087								Haliclona (Haliclona) sp.2							Animalia	Porifera	Demospongiae	Haplosclerida	Chalinidae	Haliclona	sp.2		species
	imerss.org:PMLS:5971			Count: some		Andy Lamb								PRESENT				Hamigera sp.					iNaturalist:342247								Hamigera							Animalia	Porifera	Demospongiae	Poecilosclerida	Hymedesmiidae	Hamigera			genus
	imerss.org:PMLS:5972			Count: very many		Andy Lamb								PRESENT				Aplysilla sp. nov.					iNaturalist:63646								Aplysilla							Animalia	Porifera	Demospongiae	Dendroceratida	Darwinellidae	Aplysilla			genus
	imerss.org:PMLS:5973			Count: very many		Andy Lamb								PRESENT				Clathria (Microciona) pennata					iNaturalist:63672								Clathria (Microciona) pennata							Animalia	Porifera	Demospongiae	Poecilosclerida	Microcionidae	Clathria	pennata		species		(Lambe, 1895)
	imerss.org:PMLS:5974			Count: some		Andy Lamb								PRESENT				Myxilla (Myxilla) incrustans					iNaturalist:256019								Myxilla (Myxilla) incrustans							Animalia	Porifera	Demospongiae	Poecilosclerida	Myxillidae	Myxilla	incrustans		species		(Johnston, 1842)
	imerss.org:PMLS:6066			Count: abundant		Andy Lamb								PRESENT				Cliona californiana					iNaturalist:424811								Cliona californiana							Animalia	Porifera	Demospongiae	Clionaida	Clionaidae	Cliona	californiana		species		de Laubenfels, 1932
	imerss.org:PMLS:6067					Andy Lamb		1						PRESENT				Xestospongia hispida					iNaturalist:873856								Xestospongia hispida							Animalia	Porifera	Demospongiae	Haplosclerida	Petrosiidae	Xestospongia	hispida		species		(Ridley & Dendy, 1886)
	imerss.org:PMLS:6068			Count: abundant		Andy Lamb								PRESENT				Myxilla (Myxilla) lacunosa					iNaturalist:459826								Myxilla (Myxilla) lacunosa							Animalia	Porifera	Demospongiae	Poecilosclerida	Myxillidae	Myxilla	lacunosa		species		Lambe, 1893
	imerss.org:PMLS:6069			Count: many		Andy Lamb								PRESENT				Halichondria (Halichondria) bowerbanki					iNaturalist:120498								Halichondria (Halichondria) bowerbanki							Animalia	Porifera	Demospongiae	Suberitida	Halichondriidae	Halichondria	bowerbanki		species		Burton, 1930
	imerss.org:PMLS:6070			Count: some		Andy Lamb								PRESENT				Haliclona (Haliclona) sp.2					iNaturalist:1227087								Haliclona (Haliclona) sp.2							Animalia	Porifera	Demospongiae	Haplosclerida	Chalinidae	Haliclona	sp.2		species
	imerss.org:PMLS:6071			Count: very many		Andy Lamb								PRESENT				Aplysilla sp. nov.					iNaturalist:63646								Aplysilla							Animalia	Porifera	Demospongiae	Dendroceratida	Darwinellidae	Aplysilla			genus
	imerss.org:PMLS:6072			Count: many		Andy Lamb								PRESENT				Clathria (Microciona) pennata					iNaturalist:63672								Clathria (Microciona) pennata							Animalia	Porifera	Demospongiae	Poecilosclerida	Microcionidae	Clathria	pennata		species		(Lambe, 1895)
	imerss.org:PMLS:6073			Count: some		Andy Lamb								PRESENT				Myxilla (Myxilla) incrustans					iNaturalist:256019								Myxilla (Myxilla) incrustans							Animalia	Porifera	Demospongiae	Poecilosclerida	Myxillidae	Myxilla	incrustans		species		(Johnston, 1842)
	imerss.org:PMLS:6074			Count: some		Andy Lamb								PRESENT				Mycale (Aegogropila) adhaerens					iNaturalist:256010								Mycale (Aegogropila) adhaerens							Animalia	Porifera	Demospongiae	Poecilosclerida	Mycalidae	Mycale	adhaerens		species		(Lambe, 1893)
	imerss.org:PMLS:6187			Count: many		Andy Lamb								PRESENT				Cliona californiana					iNaturalist:424811								Cliona californiana							Animalia	Porifera	Demospongiae	Clionaida	Clionaidae	Cliona	californiana		species		de Laubenfels, 1932
	imerss.org:PMLS:6188			Count: some		Andy Lamb								PRESENT				Homaxinella amphispicula					iNaturalist:459847								Homaxinella amphispicula							Animalia	Porifera	Demospongiae	Suberitida	Suberitidae	Homaxinella	amphispicula		species		(de Laubenfels, 1961)
	imerss.org:PMLS:6189			Count: few		Andy Lamb								PRESENT				Myxilla (Myxilla) lacunosa					iNaturalist:459826								Myxilla (Myxilla) lacunosa							Animalia	Porifera	Demospongiae	Poecilosclerida	Myxillidae	Myxilla	lacunosa		species		Lambe, 1893
	imerss.org:PMLS:6190			Count: some		Andy Lamb								PRESENT				Clathria (Microciona) pennata					iNaturalist:63672								Clathria (Microciona) pennata							Animalia	Porifera	Demospongiae	Poecilosclerida	Microcionidae	Clathria	pennata		species		(Lambe, 1895)
	imerss.org:PMLS:6191			Count: some		Andy Lamb								PRESENT				Myxilla (Myxilla) incrustans					iNaturalist:256019								Myxilla (Myxilla) incrustans							Animalia	Porifera	Demospongiae	Poecilosclerida	Myxillidae	Myxilla	incrustans		species		(Johnston, 1842)
	imerss.org:PMLS:6192			Count: some		Andy Lamb								PRESENT				Mycale (Aegogropila) adhaerens					iNaturalist:256010								Mycale (Aegogropila) adhaerens							Animalia	Porifera	Demospongiae	Poecilosclerida	Mycalidae	Mycale	adhaerens		species		(Lambe, 1893)
	imerss.org:PMLS:6286			Count: many		Andy Lamb								PRESENT				Cliona californiana					iNaturalist:424811								Cliona californiana							Animalia	Porifera	Demospongiae	Clionaida	Clionaidae	Cliona	californiana		species		de Laubenfels, 1932
	imerss.org:PMLS:6287			Count: few		Andy Lamb								PRESENT				Myxilla (Myxilla) lacunosa					iNaturalist:459826								Myxilla (Myxilla) lacunosa							Animalia	Porifera	Demospongiae	Poecilosclerida	Myxillidae	Myxilla	lacunosa		species		Lambe, 1893
	imerss.org:PMLS:6288			Count: some		Andy Lamb								PRESENT				Aplysilla sp. nov.					iNaturalist:63646								Aplysilla							Animalia	Porifera	Demospongiae	Dendroceratida	Darwinellidae	Aplysilla			genus
	imerss.org:PMLS:6289			Count: some		Andy Lamb								PRESENT				Clathria (Microciona) pennata					iNaturalist:63672								Clathria (Microciona) pennata							Animalia	Porifera	Demospongiae	Poecilosclerida	Microcionidae	Clathria	pennata		species		(Lambe, 1895)
	imerss.org:PMLS:6290			Count: some		Andy Lamb								PRESENT				Myxilla (Myxilla) incrustans					iNaturalist:256019								Myxilla (Myxilla) incrustans							Animalia	Porifera	Demospongiae	Poecilosclerida	Myxillidae	Myxilla	incrustans		species		(Johnston, 1842)
	imerss.org:PMLS:6291			Count: some		Andy Lamb								PRESENT				Mycale (Aegogropila) adhaerens					iNaturalist:256010								Mycale (Aegogropila) adhaerens							Animalia	Porifera	Demospongiae	Poecilosclerida	Mycalidae	Mycale	adhaerens		species		(Lambe, 1893)
	imerss.org:PMLS:6292			Count: few		Andy Lamb								PRESENT				Halichondria (Eumastia) sitiens					iNaturalist:459775								Halichondria (Eumastia) sitiens							Animalia	Porifera	Demospongiae	Suberitida	Halichondriidae	Halichondria	sitiens		species		(Schmidt, 1870)
	imerss.org:PMLS:6380			Count: very many		Andy Lamb								PRESENT				Cliona californiana					iNaturalist:424811								Cliona californiana							Animalia	Porifera	Demospongiae	Clionaida	Clionaidae	Cliona	californiana		species		de Laubenfels, 1932
	imerss.org:PMLS:6381			Count: some		Andy Lamb								PRESENT				Clathria (Microciona) pennata					iNaturalist:63672								Clathria (Microciona) pennata							Animalia	Porifera	Demospongiae	Poecilosclerida	Microcionidae	Clathria	pennata		species		(Lambe, 1895)
	imerss.org:PMLS:6382			Count: some		Andy Lamb								PRESENT				Myxilla (Myxilla) incrustans					iNaturalist:256019								Myxilla (Myxilla) incrustans							Animalia	Porifera	Demospongiae	Poecilosclerida	Myxillidae	Myxilla	incrustans		species		(Johnston, 1842)
	imerss.org:PMLS:6383			Count: some		Andy Lamb								PRESENT				Mycale (Aegogropila) adhaerens					iNaturalist:256010								Mycale (Aegogropila) adhaerens							Animalia	Porifera	Demospongiae	Poecilosclerida	Mycalidae	Mycale	adhaerens		species		(Lambe, 1893)
	imerss.org:PMLS:6473			Count: many		Andy Lamb								PRESENT				Cliona californiana					iNaturalist:424811								Cliona californiana							Animalia	Porifera	Demospongiae	Clionaida	Clionaidae	Cliona	californiana		species		de Laubenfels, 1932
	imerss.org:PMLS:6474			Count: few		Andy Lamb								PRESENT				Xestospongia hispida					iNaturalist:873856								Xestospongia hispida							Animalia	Porifera	Demospongiae	Haplosclerida	Petrosiidae	Xestospongia	hispida		species		(Ridley & Dendy, 1886)
	imerss.org:PMLS:6475			Count: many		Andy Lamb								PRESENT				Aplysilla sp. nov.					iNaturalist:63646								Aplysilla							Animalia	Porifera	Demospongiae	Dendroceratida	Darwinellidae	Aplysilla			genus
	imerss.org:PMLS:6476			Count: very many		Andy Lamb								PRESENT				Clathria (Microciona) pennata					iNaturalist:63672								Clathria (Microciona) pennata							Animalia	Porifera	Demospongiae	Poecilosclerida	Microcionidae	Clathria	pennata		species		(Lambe, 1895)
	imerss.org:PMLS:6553			Count: very many		Andy Lamb								PRESENT				Cliona californiana					iNaturalist:424811								Cliona californiana							Animalia	Porifera	Demospongiae	Clionaida	Clionaidae	Cliona	californiana		species		de Laubenfels, 1932
	imerss.org:PMLS:6554			Count: few		Andy Lamb								PRESENT				Aplysilla sp. nov.					iNaturalist:63646								Aplysilla							Animalia	Porifera	Demospongiae	Dendroceratida	Darwinellidae	Aplysilla			genus
	imerss.org:PMLS:6555			Count: some		Andy Lamb								PRESENT				Clathria (Microciona) pennata					iNaturalist:63672								Clathria (Microciona) pennata							Animalia	Porifera	Demospongiae	Poecilosclerida	Microcionidae	Clathria	pennata		species		(Lambe, 1895)
	imerss.org:PMLS:6556			Count: some		Andy Lamb								PRESENT				Myxilla (Myxilla) incrustans					iNaturalist:256019								Myxilla (Myxilla) incrustans							Animalia	Porifera	Demospongiae	Poecilosclerida	Myxillidae	Myxilla	incrustans		species		(Johnston, 1842)
	imerss.org:PMLS:6645			Count: very many		Andy Lamb								PRESENT				Cliona californiana					iNaturalist:424811								Cliona californiana							Animalia	Porifera	Demospongiae	Clionaida	Clionaidae	Cliona	californiana		species		de Laubenfels, 1932
	imerss.org:PMLS:6646			Count: many		Andy Lamb								PRESENT				Myxilla (Myxilla) lacunosa					iNaturalist:459826								Myxilla (Myxilla) lacunosa							Animalia	Porifera	Demospongiae	Poecilosclerida	Myxillidae	Myxilla	lacunosa		species		Lambe, 1893
	imerss.org:PMLS:6647			Count: very many		Andy Lamb								PRESENT				Clathria (Microciona) pennata					iNaturalist:63672								Clathria (Microciona) pennata							Animalia	Porifera	Demospongiae	Poecilosclerida	Microcionidae	Clathria	pennata		species		(Lambe, 1895)
	imerss.org:PMLS:6724			Count: many		Andy Lamb								PRESENT				Craniella villosa					iNaturalist:459732								Craniella villosa							Animalia	Porifera	Demospongiae	Tetractinellida	Tetillidae	Craniella	villosa		species		Lambe, 1893
	imerss.org:PMLS:6725			Count: many		Andy Lamb								PRESENT				Cliona californiana					iNaturalist:424811								Cliona californiana							Animalia	Porifera	Demospongiae	Clionaida	Clionaidae	Cliona	californiana		species		de Laubenfels, 1932
	imerss.org:PMLS:6726					Andy Lamb		1						PRESENT				Suberites concinnus					iNaturalist:873889								Suberites concinnus							Animalia	Porifera	Demospongiae	Suberitida	Suberitidae	Suberites	concinnus		species		Lambe, 1895
	imerss.org:PMLS:6727			Count: some		Andy Lamb								PRESENT				Amphilectus digitatus					iNaturalist:459874								Amphilectus digitatus							Animalia	Porifera	Demospongiae	Poecilosclerida	Esperiopsidae	Amphilectus	digitatus		species		(Miklucho-Maclay, 1870)
	imerss.org:PMLS:6728			Count: many		Andy Lamb								PRESENT				Xestospongia hispida					iNaturalist:873856								Xestospongia hispida							Animalia	Porifera	Demospongiae	Haplosclerida	Petrosiidae	Xestospongia	hispida		species		(Ridley & Dendy, 1886)
	imerss.org:PMLS:6729			Count: abundant		Andy Lamb								PRESENT				Myxilla (Myxilla) lacunosa					iNaturalist:459826								Myxilla (Myxilla) lacunosa							Animalia	Porifera	Demospongiae	Poecilosclerida	Myxillidae	Myxilla	lacunosa		species		Lambe, 1893
	imerss.org:PMLS:6730			Count: some		Andy Lamb								PRESENT				Halichondria (Halichondria) bowerbanki					iNaturalist:120498								Halichondria (Halichondria) bowerbanki							Animalia	Porifera	Demospongiae	Suberitida	Halichondriidae	Halichondria	bowerbanki		species		Burton, 1930
	imerss.org:PMLS:6731			Count: some		Andy Lamb								PRESENT				Haliclona (Haliclona) sp.2					iNaturalist:1227087								Haliclona (Haliclona) sp.2							Animalia	Porifera	Demospongiae	Haplosclerida	Chalinidae	Haliclona	sp.2		species
	imerss.org:PMLS:6732			Count: some		Andy Lamb								PRESENT				Clathria (Microciona) pennata					iNaturalist:63672								Clathria (Microciona) pennata							Animalia	Porifera	Demospongiae	Poecilosclerida	Microcionidae	Clathria	pennata		species		(Lambe, 1895)
	imerss.org:PMLS:6733			Count: few		Andy Lamb								PRESENT				Myxilla (Myxilla) incrustans					iNaturalist:256019								Myxilla (Myxilla) incrustans							Animalia	Porifera	Demospongiae	Poecilosclerida	Myxillidae	Myxilla	incrustans		species		(Johnston, 1842)
	imerss.org:PMLS:6734			Count: few		Andy Lamb								PRESENT				Mycale (Aegogropila) adhaerens					iNaturalist:256010								Mycale (Aegogropila) adhaerens							Animalia	Porifera	Demospongiae	Poecilosclerida	Mycalidae	Mycale	adhaerens		species		(Lambe, 1893)
	imerss.org:PMLS:6843			Count: many		Andy Lamb								PRESENT				Cliona californiana					iNaturalist:424811								Cliona californiana							Animalia	Porifera	Demospongiae	Clionaida	Clionaidae	Cliona	californiana		species		de Laubenfels, 1932
	imerss.org:PMLS:6844			Count: some		Andy Lamb								PRESENT				Clathria (Microciona) pennata					iNaturalist:63672								Clathria (Microciona) pennata							Animalia	Porifera	Demospongiae	Poecilosclerida	Microcionidae	Clathria	pennata		species		(Lambe, 1895)
	imerss.org:PMLS:6845			Count: few		Andy Lamb								PRESENT				Myxilla (Myxilla) incrustans					iNaturalist:256019								Myxilla (Myxilla) incrustans							Animalia	Porifera	Demospongiae	Poecilosclerida	Myxillidae	Myxilla	incrustans		species		(Johnston, 1842)
	imerss.org:PMLS:6846			Count: few		Andy Lamb								PRESENT				Mycale (Aegogropila) adhaerens					iNaturalist:256010								Mycale (Aegogropila) adhaerens							Animalia	Porifera	Demospongiae	Poecilosclerida	Mycalidae	Mycale	adhaerens		species		(Lambe, 1893)
	imerss.org:PMLS:6964			Count: some		Andy Lamb								PRESENT				Sycon spp.					iNaturalist:347738								Sycon							Animalia	Porifera	Calcarea	Leucosolenida	Sycettidae	Sycon			genus
	imerss.org:PMLS:6965			Count: many		Andy Lamb								PRESENT				Leucilla nuttingi					iNaturalist:117713								Leucilla nuttingi							Animalia	Porifera	Calcarea	Leucosolenida	Amphoriscidae	Leucilla	nuttingi		species		(Urban, 1902)
	imerss.org:PMLS:6966			Count: many		Andy Lamb								PRESENT				Leucosolenia nautilia					iNaturalist:347319								Leucosolenia nautilia							Animalia	Porifera	Calcarea	Leucosolenida	Leucosoleniidae	Leucosolenia	nautilia		species		de Laubenfels, 1930
	imerss.org:PMLS:6967			Count: some		Andy Lamb								PRESENT				Cliona californiana					iNaturalist:424811								Cliona californiana							Animalia	Porifera	Demospongiae	Clionaida	Clionaidae	Cliona	californiana		species		de Laubenfels, 1932
	imerss.org:PMLS:6968			Count: very many		Andy Lamb								PRESENT				Clathria (Microciona) pennata					iNaturalist:63672								Clathria (Microciona) pennata							Animalia	Porifera	Demospongiae	Poecilosclerida	Microcionidae	Clathria	pennata		species		(Lambe, 1895)
	imerss.org:PMLS:6969			Count: few		Andy Lamb								PRESENT				Myxilla (Myxilla) incrustans					iNaturalist:256019								Myxilla (Myxilla) incrustans							Animalia	Porifera	Demospongiae	Poecilosclerida	Myxillidae	Myxilla	incrustans		species		(Johnston, 1842)
	imerss.org:PMLS:6970			Count: few		Andy Lamb								PRESENT				Mycale (Aegogropila) adhaerens					iNaturalist:256010								Mycale (Aegogropila) adhaerens							Animalia	Porifera	Demospongiae	Poecilosclerida	Mycalidae	Mycale	adhaerens		species		(Lambe, 1893)
	imerss.org:PMLS:7108			Count: very many		Andy Lamb								PRESENT				Sycon spp.					iNaturalist:347738								Sycon							Animalia	Porifera	Calcarea	Leucosolenida	Sycettidae	Sycon			genus
	imerss.org:PMLS:7109			Count: some		Andy Lamb								PRESENT				Leucosolenia nautilia					iNaturalist:347319								Leucosolenia nautilia							Animalia	Porifera	Calcarea	Leucosolenida	Leucosoleniidae	Leucosolenia	nautilia		species		de Laubenfels, 1930
	imerss.org:PMLS:7110			Count: very many		Andy Lamb								PRESENT				Leucosolenia eleanor					iNaturalist:424817								Leucosolenia eleanor							Animalia	Porifera	Calcarea	Leucosolenida	Leucosoleniidae	Leucosolenia	eleanor		species		Urban, 1906
	imerss.org:PMLS:7111			Count: very many		Andy Lamb								PRESENT				Cliona californiana					iNaturalist:424811								Cliona californiana							Animalia	Porifera	Demospongiae	Clionaida	Clionaidae	Cliona	californiana		species		de Laubenfels, 1932
	imerss.org:PMLS:7112			Count: very many		Andy Lamb								PRESENT				Clathria (Microciona) pennata					iNaturalist:63672								Clathria (Microciona) pennata							Animalia	Porifera	Demospongiae	Poecilosclerida	Microcionidae	Clathria	pennata		species		(Lambe, 1895)
	imerss.org:PMLS:7113			Count: some		Andy Lamb								PRESENT				Myxilla (Myxilla) incrustans					iNaturalist:256019								Myxilla (Myxilla) incrustans							Animalia	Porifera	Demospongiae	Poecilosclerida	Myxillidae	Myxilla	incrustans		species		(Johnston, 1842)
	imerss.org:PMLS:7269			Count: very many		Andy Lamb								PRESENT				Cliona californiana					iNaturalist:424811								Cliona californiana							Animalia	Porifera	Demospongiae	Clionaida	Clionaidae	Cliona	californiana		species		de Laubenfels, 1932
	imerss.org:PMLS:7270			Count: some		Andy Lamb								PRESENT				Clathria (Microciona) pennata					iNaturalist:63672								Clathria (Microciona) pennata							Animalia	Porifera	Demospongiae	Poecilosclerida	Microcionidae	Clathria	pennata		species		(Lambe, 1895)
	imerss.org:PMLS:7271			Count: few		Andy Lamb								PRESENT				Mycale (Aegogropila) adhaerens					iNaturalist:256010								Mycale (Aegogropila) adhaerens							Animalia	Porifera	Demospongiae	Poecilosclerida	Mycalidae	Mycale	adhaerens		species		(Lambe, 1893)
	imerss.org:PMLS:7381			Count: very many		Andy Lamb								PRESENT				Leucosolenia eleanor					iNaturalist:424817								Leucosolenia eleanor							Animalia	Porifera	Calcarea	Leucosolenida	Leucosoleniidae	Leucosolenia	eleanor		species		Urban, 1906
	imerss.org:PMLS:7382			Count: some		Andy Lamb								PRESENT				Cliona californiana					iNaturalist:424811								Cliona californiana							Animalia	Porifera	Demospongiae	Clionaida	Clionaidae	Cliona	californiana		species		de Laubenfels, 1932
	imerss.org:PMLS:7383					Andy Lamb		1						PRESENT				Haliclona (Haliclona) sp.1					iNaturalist:1227076								Haliclona (Haliclona) sp.1							Animalia	Porifera	Demospongiae	Haplosclerida	Chalinidae	Haliclona	sp.1		species
	imerss.org:PMLS:7384			Count: some		Andy Lamb								PRESENT				Clathria (Microciona) pennata					iNaturalist:63672								Clathria (Microciona) pennata							Animalia	Porifera	Demospongiae	Poecilosclerida	Microcionidae	Clathria	pennata		species		(Lambe, 1895)
	imerss.org:PMLS:7385			Count: few		Andy Lamb								PRESENT				Myxilla (Myxilla) incrustans					iNaturalist:256019								Myxilla (Myxilla) incrustans							Animalia	Porifera	Demospongiae	Poecilosclerida	Myxillidae	Myxilla	incrustans		species		(Johnston, 1842)
	imerss.org:PMLS:7386			Count: few		Andy Lamb								PRESENT				Mycale (Aegogropila) adhaerens					iNaturalist:256010								Mycale (Aegogropila) adhaerens							Animalia	Porifera	Demospongiae	Poecilosclerida	Mycalidae	Mycale	adhaerens		species		(Lambe, 1893)
	imerss.org:PMLS:7505			Count: very many		Andy Lamb								PRESENT				Leucosolenia nautilia					iNaturalist:347319								Leucosolenia nautilia							Animalia	Porifera	Calcarea	Leucosolenida	Leucosoleniidae	Leucosolenia	nautilia		species		de Laubenfels, 1930
	imerss.org:PMLS:7506			Count: many		Andy Lamb								PRESENT				Cliona californiana					iNaturalist:424811								Cliona californiana							Animalia	Porifera	Demospongiae	Clionaida	Clionaidae	Cliona	californiana		species		de Laubenfels, 1932
	imerss.org:PMLS:7507			Count: some		Andy Lamb								PRESENT				Clathria (Microciona) pennata					iNaturalist:63672								Clathria (Microciona) pennata							Animalia	Porifera	Demospongiae	Poecilosclerida	Microcionidae	Clathria	pennata		species		(Lambe, 1895)
	imerss.org:PMLS:7508			Count: some		Andy Lamb								PRESENT				Mycale (Aegogropila) adhaerens					iNaturalist:256010								Mycale (Aegogropila) adhaerens							Animalia	Porifera	Demospongiae	Poecilosclerida	Mycalidae	Mycale	adhaerens		species		(Lambe, 1893)
	imerss.org:PMLS:7598			Count: some		Andy Lamb								PRESENT				Cliona californiana					iNaturalist:424811								Cliona californiana							Animalia	Porifera	Demospongiae	Clionaida	Clionaidae	Cliona	californiana		species		de Laubenfels, 1932
	imerss.org:PMLS:7599			Count: some		Andy Lamb								PRESENT				Hamigera sp.					iNaturalist:342247								Hamigera							Animalia	Porifera	Demospongiae	Poecilosclerida	Hymedesmiidae	Hamigera			genus
	imerss.org:PMLS:7600			Count: many		Andy Lamb								PRESENT				Clathria (Microciona) pennata					iNaturalist:63672								Clathria (Microciona) pennata							Animalia	Porifera	Demospongiae	Poecilosclerida	Microcionidae	Clathria	pennata		species		(Lambe, 1895)
	imerss.org:PMLS:7601			Count: some		Andy Lamb								PRESENT				Mycale (Aegogropila) adhaerens					iNaturalist:256010								Mycale (Aegogropila) adhaerens							Animalia	Porifera	Demospongiae	Poecilosclerida	Mycalidae	Mycale	adhaerens		species		(Lambe, 1893)
	imerss.org:PMLS:7710			Count: some		Andy Lamb								PRESENT				Leucosolenia eleanor					iNaturalist:424817								Leucosolenia eleanor							Animalia	Porifera	Calcarea	Leucosolenida	Leucosoleniidae	Leucosolenia	eleanor		species		Urban, 1906
	imerss.org:PMLS:7711					Andy Lamb		1						PRESENT				Weberella perlucida					iNaturalist:424640								Weberella perlucida							Animalia	Porifera	Demospongiae	Polymastiida	Polymastiidae	Weberella	perlucida		species		Austin, Ott, Reiswig, Romagosa & McDaniel, 2014
	imerss.org:PMLS:7712			Count: some		Andy Lamb								PRESENT				Cliona californiana					iNaturalist:424811								Cliona californiana							Animalia	Porifera	Demospongiae	Clionaida	Clionaidae	Cliona	californiana		species		de Laubenfels, 1932
	imerss.org:PMLS:7713					Andy Lamb		1						PRESENT				Isodictya rigida					iNaturalist:459878								Isodictya rigida							Animalia	Porifera	Demospongiae	Poecilosclerida	Isodictyidae	Isodictya	rigida		species		(Lambe, 1893)
	imerss.org:PMLS:7714			Count: some		Andy Lamb								PRESENT				Clathria (Microciona) pennata					iNaturalist:63672								Clathria (Microciona) pennata							Animalia	Porifera	Demospongiae	Poecilosclerida	Microcionidae	Clathria	pennata		species		(Lambe, 1895)
	imerss.org:PMLS:7715			Count: few		Andy Lamb								PRESENT				Mycale (Aegogropila) adhaerens					iNaturalist:256010								Mycale (Aegogropila) adhaerens							Animalia	Porifera	Demospongiae	Poecilosclerida	Mycalidae	Mycale	adhaerens		species		(Lambe, 1893)
	imerss.org:PMLS:7808			Count: abundant		Andy Lamb								PRESENT				Cliona californiana					iNaturalist:424811								Cliona californiana							Animalia	Porifera	Demospongiae	Clionaida	Clionaidae	Cliona	californiana		species		de Laubenfels, 1932
	imerss.org:PMLS:7809			Count: many		Andy Lamb								PRESENT				Myxilla (Myxilla) lacunosa					iNaturalist:459826								Myxilla (Myxilla) lacunosa							Animalia	Porifera	Demospongiae	Poecilosclerida	Myxillidae	Myxilla	lacunosa		species		Lambe, 1893
	imerss.org:PMLS:7810			Count: few		Andy Lamb								PRESENT				Haliclona (Haliclona) sp.2					iNaturalist:1227087								Haliclona (Haliclona) sp.2							Animalia	Porifera	Demospongiae	Haplosclerida	Chalinidae	Haliclona	sp.2		species
	imerss.org:PMLS:7811			Count: few		Andy Lamb								PRESENT				Aplysilla sp. nov.					iNaturalist:63646								Aplysilla							Animalia	Porifera	Demospongiae	Dendroceratida	Darwinellidae	Aplysilla			genus
	imerss.org:PMLS:7812			Count: few		Andy Lamb								PRESENT				Acarnus erithacus					iNaturalist:63669								Acarnus erithacus							Animalia	Porifera	Demospongiae	Poecilosclerida	Acarnidae	Acarnus	erithacus		species		de Laubenfels, 1927
	imerss.org:PMLS:7813			Count: some		Andy Lamb								PRESENT				Clathria (Microciona) pennata					iNaturalist:63672								Clathria (Microciona) pennata							Animalia	Porifera	Demospongiae	Poecilosclerida	Microcionidae	Clathria	pennata		species		(Lambe, 1895)
	imerss.org:PMLS:7814			Count: few		Andy Lamb								PRESENT				Myxilla (Myxilla) incrustans					iNaturalist:256019								Myxilla (Myxilla) incrustans							Animalia	Porifera	Demospongiae	Poecilosclerida	Myxillidae	Myxilla	incrustans		species		(Johnston, 1842)
	imerss.org:PMLS:7898			Count: some		Andy Lamb								PRESENT				Cliona californiana					iNaturalist:424811								Cliona californiana							Animalia	Porifera	Demospongiae	Clionaida	Clionaidae	Cliona	californiana		species		de Laubenfels, 1932
	imerss.org:PMLS:7899					Andy Lamb		1						PRESENT				Suberites latus					iNaturalist:473057								Suberites latus							Animalia	Porifera	Demospongiae	Suberitida	Suberitidae	Suberites	latus		species		Lambe, 1893
	imerss.org:PMLS:7900			Count: very many		Andy Lamb								PRESENT				Semisuberites cribrosa					iNaturalist:194571								Semisuberites cribrosa							Animalia	Porifera	Demospongiae	Poecilosclerida	Esperiopsidae	Semisuberites	cribrosa		species		(Miklucho-Maclay, 1870)
	imerss.org:PMLS:7901			Count: few		Andy Lamb								PRESENT				Myxilla (Myxilla) lacunosa					iNaturalist:459826								Myxilla (Myxilla) lacunosa							Animalia	Porifera	Demospongiae	Poecilosclerida	Myxillidae	Myxilla	lacunosa		species		Lambe, 1893
	imerss.org:PMLS:7902			Count: few		Andy Lamb								PRESENT				Haliclona (Haliclona) sp.2					iNaturalist:1227087								Haliclona (Haliclona) sp.2							Animalia	Porifera	Demospongiae	Haplosclerida	Chalinidae	Haliclona	sp.2		species
	imerss.org:PMLS:7903			Count: some		Andy Lamb								PRESENT				Clathria (Microciona) pennata					iNaturalist:63672								Clathria (Microciona) pennata							Animalia	Porifera	Demospongiae	Poecilosclerida	Microcionidae	Clathria	pennata		species		(Lambe, 1895)
	imerss.org:PMLS:7904			Count: some		Andy Lamb								PRESENT				Myxilla (Myxilla) incrustans					iNaturalist:256019								Myxilla (Myxilla) incrustans							Animalia	Porifera	Demospongiae	Poecilosclerida	Myxillidae	Myxilla	incrustans		species		(Johnston, 1842)
	imerss.org:PMLS:8000			Count: few		Andy Lamb								PRESENT				Leucilla nuttingi					iNaturalist:117713								Leucilla nuttingi							Animalia	Porifera	Calcarea	Leucosolenida	Amphoriscidae	Leucilla	nuttingi		species		(Urban, 1902)
	imerss.org:PMLS:8001			Count: many		Andy Lamb								PRESENT				Cliona californiana					iNaturalist:424811								Cliona californiana							Animalia	Porifera	Demospongiae	Clionaida	Clionaidae	Cliona	californiana		species		de Laubenfels, 1932
	imerss.org:PMLS:8002			Count: few		Andy Lamb								PRESENT				Homaxinella amphispicula					iNaturalist:459847								Homaxinella amphispicula							Animalia	Porifera	Demospongiae	Suberitida	Suberitidae	Homaxinella	amphispicula		species		(de Laubenfels, 1961)
	imerss.org:PMLS:8003			Count: some		Andy Lamb								PRESENT				Clathria (Microciona) pennata					iNaturalist:63672								Clathria (Microciona) pennata							Animalia	Porifera	Demospongiae	Poecilosclerida	Microcionidae	Clathria	pennata		species		(Lambe, 1895)
	imerss.org:PMLS:8004			Count: few		Andy Lamb								PRESENT				Myxilla (Myxilla) incrustans					iNaturalist:256019								Myxilla (Myxilla) incrustans							Animalia	Porifera	Demospongiae	Poecilosclerida	Myxillidae	Myxilla	incrustans		species		(Johnston, 1842)
	imerss.org:PMLS:8005			Count: few		Andy Lamb								PRESENT				Mycale (Aegogropila) adhaerens					iNaturalist:256010								Mycale (Aegogropila) adhaerens							Animalia	Porifera	Demospongiae	Poecilosclerida	Mycalidae	Mycale	adhaerens		species		(Lambe, 1893)
	imerss.org:PMLS:8105			Count: few		Andy Lamb								PRESENT				Craniella villosa					iNaturalist:459732								Craniella villosa							Animalia	Porifera	Demospongiae	Tetractinellida	Tetillidae	Craniella	villosa		species		Lambe, 1893
	imerss.org:PMLS:8106			Count: many		Andy Lamb								PRESENT				Cliona californiana					iNaturalist:424811								Cliona californiana							Animalia	Porifera	Demospongiae	Clionaida	Clionaidae	Cliona	californiana		species		de Laubenfels, 1932
	imerss.org:PMLS:8107			Count: few		Andy Lamb								PRESENT				Myxilla (Myxilla) lacunosa					iNaturalist:459826								Myxilla (Myxilla) lacunosa							Animalia	Porifera	Demospongiae	Poecilosclerida	Myxillidae	Myxilla	lacunosa		species		Lambe, 1893
	imerss.org:PMLS:8108			Count: few		Andy Lamb								PRESENT				Halichondria (Halichondria) bowerbanki					iNaturalist:120498								Halichondria (Halichondria) bowerbanki							Animalia	Porifera	Demospongiae	Suberitida	Halichondriidae	Halichondria	bowerbanki		species		Burton, 1930
	imerss.org:PMLS:8109			Count: some		Andy Lamb								PRESENT				Clathria (Microciona) pennata					iNaturalist:63672								Clathria (Microciona) pennata							Animalia	Porifera	Demospongiae	Poecilosclerida	Microcionidae	Clathria	pennata		species		(Lambe, 1895)
	imerss.org:PMLS:8202			Count: very many		Andy Lamb								PRESENT				Craniella villosa					iNaturalist:459732								Craniella villosa							Animalia	Porifera	Demospongiae	Tetractinellida	Tetillidae	Craniella	villosa		species		Lambe, 1893
	imerss.org:PMLS:8203			Count: many		Andy Lamb								PRESENT				Cliona californiana					iNaturalist:424811								Cliona californiana							Animalia	Porifera	Demospongiae	Clionaida	Clionaidae	Cliona	californiana		species		de Laubenfels, 1932
	imerss.org:PMLS:8204			Count: many		Andy Lamb								PRESENT				Clathria (Microciona) pennata					iNaturalist:63672								Clathria (Microciona) pennata							Animalia	Porifera	Demospongiae	Poecilosclerida	Microcionidae	Clathria	pennata		species		(Lambe, 1895)
	imerss.org:PMLS:8205			Count: few		Andy Lamb								PRESENT				Myxilla (Myxilla) incrustans					iNaturalist:256019								Myxilla (Myxilla) incrustans							Animalia	Porifera	Demospongiae	Poecilosclerida	Myxillidae	Myxilla	incrustans		species		(Johnston, 1842)
	imerss.org:PMLS:8206			Count: few		Andy Lamb								PRESENT				Mycale (Aegogropila) adhaerens					iNaturalist:256010								Mycale (Aegogropila) adhaerens							Animalia	Porifera	Demospongiae	Poecilosclerida	Mycalidae	Mycale	adhaerens		species		(Lambe, 1893)
	imerss.org:PMLS:8280			Count: many		Andy Lamb								PRESENT				Cliona californiana					iNaturalist:424811								Cliona californiana							Animalia	Porifera	Demospongiae	Clionaida	Clionaidae	Cliona	californiana		species		de Laubenfels, 1932
	imerss.org:PMLS:8281			Count: few		Andy Lamb								PRESENT				Xestospongia hispida					iNaturalist:873856								Xestospongia hispida							Animalia	Porifera	Demospongiae	Haplosclerida	Petrosiidae	Xestospongia	hispida		species		(Ridley & Dendy, 1886)
	imerss.org:PMLS:8282			Count: some		Andy Lamb								PRESENT				Myxilla (Myxilla) lacunosa					iNaturalist:459826								Myxilla (Myxilla) lacunosa							Animalia	Porifera	Demospongiae	Poecilosclerida	Myxillidae	Myxilla	lacunosa		species		Lambe, 1893
	imerss.org:PMLS:8283			Count: some		Andy Lamb								PRESENT				Halichondria (Halichondria) bowerbanki					iNaturalist:120498								Halichondria (Halichondria) bowerbanki							Animalia	Porifera	Demospongiae	Suberitida	Halichondriidae	Halichondria	bowerbanki		species		Burton, 1930
	imerss.org:PMLS:8284			Count: few		Andy Lamb								PRESENT				Haliclona (Haliclona) sp.2					iNaturalist:1227087								Haliclona (Haliclona) sp.2							Animalia	Porifera	Demospongiae	Haplosclerida	Chalinidae	Haliclona	sp.2		species
	imerss.org:PMLS:8285			Count: some		Andy Lamb								PRESENT				Clathria (Microciona) pennata					iNaturalist:63672								Clathria (Microciona) pennata							Animalia	Porifera	Demospongiae	Poecilosclerida	Microcionidae	Clathria	pennata		species		(Lambe, 1895)
	imerss.org:PMLS:8286			Count: few		Andy Lamb								PRESENT				Myxilla (Myxilla) incrustans					iNaturalist:256019								Myxilla (Myxilla) incrustans							Animalia	Porifera	Demospongiae	Poecilosclerida	Myxillidae	Myxilla	incrustans		species		(Johnston, 1842)
	imerss.org:PMLS:8287			Count: few		Andy Lamb								PRESENT				Mycale (Aegogropila) adhaerens					iNaturalist:256010								Mycale (Aegogropila) adhaerens							Animalia	Porifera	Demospongiae	Poecilosclerida	Mycalidae	Mycale	adhaerens		species		(Lambe, 1893)
	imerss.org:PMLS:8377			Count: some		Andy Lamb								PRESENT				Cliona californiana					iNaturalist:424811								Cliona californiana							Animalia	Porifera	Demospongiae	Clionaida	Clionaidae	Cliona	californiana		species		de Laubenfels, 1932
	imerss.org:PMLS:8471			Count: some		Andy Lamb								PRESENT				Cliona californiana					iNaturalist:424811								Cliona californiana							Animalia	Porifera	Demospongiae	Clionaida	Clionaidae	Cliona	californiana		species		de Laubenfels, 1932
	imerss.org:PMLS:8472			Count: some		Andy Lamb								PRESENT				Clathria (Microciona) pennata					iNaturalist:63672								Clathria (Microciona) pennata							Animalia	Porifera	Demospongiae	Poecilosclerida	Microcionidae	Clathria	pennata		species		(Lambe, 1895)
	imerss.org:PMLS:8473			Count: few		Andy Lamb								PRESENT				Myxilla (Myxilla) incrustans					iNaturalist:256019								Myxilla (Myxilla) incrustans							Animalia	Porifera	Demospongiae	Poecilosclerida	Myxillidae	Myxilla	incrustans		species		(Johnston, 1842)
	imerss.org:PMLS:8563					Andy Lamb		1						PRESENT				Polymastia pachymastia					iNaturalist:117717								Polymastia pachymastia							Animalia	Porifera	Demospongiae	Polymastiida	Polymastiidae	Polymastia	pachymastia		species		de Laubenfels, 1932
	imerss.org:PMLS:8564			Count: many		Andy Lamb								PRESENT				Cliona californiana					iNaturalist:424811								Cliona californiana							Animalia	Porifera	Demospongiae	Clionaida	Clionaidae	Cliona	californiana		species		de Laubenfels, 1932
	imerss.org:PMLS:8565			Count: few		Andy Lamb								PRESENT				Halichondria (Halichondria) bowerbanki					iNaturalist:120498								Halichondria (Halichondria) bowerbanki							Animalia	Porifera	Demospongiae	Suberitida	Halichondriidae	Halichondria	bowerbanki		species		Burton, 1930
	imerss.org:PMLS:8566			Count: few		Andy Lamb								PRESENT				Aplysilla sp. nov.					iNaturalist:63646								Aplysilla							Animalia	Porifera	Demospongiae	Dendroceratida	Darwinellidae	Aplysilla			genus
	imerss.org:PMLS:8567			Count: some		Andy Lamb								PRESENT				Clathria (Microciona) pennata					iNaturalist:63672								Clathria (Microciona) pennata							Animalia	Porifera	Demospongiae	Poecilosclerida	Microcionidae	Clathria	pennata		species		(Lambe, 1895)
	imerss.org:PMLS:8568			Count: few		Andy Lamb								PRESENT				Myxilla (Myxilla) incrustans					iNaturalist:256019								Myxilla (Myxilla) incrustans							Animalia	Porifera	Demospongiae	Poecilosclerida	Myxillidae	Myxilla	incrustans		species		(Johnston, 1842)
	imerss.org:PMLS:8651			Count: few		Andy Lamb								PRESENT				Leucilla nuttingi					iNaturalist:117713								Leucilla nuttingi							Animalia	Porifera	Calcarea	Leucosolenida	Amphoriscidae	Leucilla	nuttingi		species		(Urban, 1902)
	imerss.org:PMLS:8652			Count: few		Andy Lamb								PRESENT				Leucosolenia eleanor					iNaturalist:424817								Leucosolenia eleanor							Animalia	Porifera	Calcarea	Leucosolenida	Leucosoleniidae	Leucosolenia	eleanor		species		Urban, 1906
	imerss.org:PMLS:8653			Count: some		Andy Lamb								PRESENT				Cliona californiana					iNaturalist:424811								Cliona californiana							Animalia	Porifera	Demospongiae	Clionaida	Clionaidae	Cliona	californiana		species		de Laubenfels, 1932
	imerss.org:PMLS:8654			Count: some		Andy Lamb								PRESENT				Clathria (Microciona) pennata					iNaturalist:63672								Clathria (Microciona) pennata							Animalia	Porifera	Demospongiae	Poecilosclerida	Microcionidae	Clathria	pennata		species		(Lambe, 1895)
	imerss.org:PMLS:8655			Count: few		Andy Lamb								PRESENT				Myxilla (Myxilla) incrustans					iNaturalist:256019								Myxilla (Myxilla) incrustans							Animalia	Porifera	Demospongiae	Poecilosclerida	Myxillidae	Myxilla	incrustans		species		(Johnston, 1842)
	imerss.org:PMLS:8752			Count: many		Andy Lamb								PRESENT				Cliona californiana					iNaturalist:424811								Cliona californiana							Animalia	Porifera	Demospongiae	Clionaida	Clionaidae	Cliona	californiana		species		de Laubenfels, 1932
	imerss.org:PMLS:8753			Count: few		Andy Lamb								PRESENT				Myxilla (Myxilla) lacunosa					iNaturalist:459826								Myxilla (Myxilla) lacunosa							Animalia	Porifera	Demospongiae	Poecilosclerida	Myxillidae	Myxilla	lacunosa		species		Lambe, 1893
	imerss.org:PMLS:8754			Count: few		Andy Lamb								PRESENT				Haliclona (Haliclona) sp.2					iNaturalist:1227087								Haliclona (Haliclona) sp.2							Animalia	Porifera	Demospongiae	Haplosclerida	Chalinidae	Haliclona	sp.2		species
	imerss.org:PMLS:8755			Count: some		Andy Lamb								PRESENT				Clathria (Microciona) pennata					iNaturalist:63672								Clathria (Microciona) pennata							Animalia	Porifera	Demospongiae	Poecilosclerida	Microcionidae	Clathria	pennata		species		(Lambe, 1895)
	imerss.org:PMLS:8756			Count: few		Andy Lamb								PRESENT				Myxilla (Myxilla) incrustans					iNaturalist:256019								Myxilla (Myxilla) incrustans							Animalia	Porifera	Demospongiae	Poecilosclerida	Myxillidae	Myxilla	incrustans		species		(Johnston, 1842)
	imerss.org:PMLS:8826			Count: some		Andy Lamb								PRESENT				Craniella villosa					iNaturalist:459732								Craniella villosa							Animalia	Porifera	Demospongiae	Tetractinellida	Tetillidae	Craniella	villosa		species		Lambe, 1893
	imerss.org:PMLS:8827			Count: some		Andy Lamb								PRESENT				Cliona californiana					iNaturalist:424811								Cliona californiana							Animalia	Porifera	Demospongiae	Clionaida	Clionaidae	Cliona	californiana		species		de Laubenfels, 1932
	imerss.org:PMLS:8828			Count: many		Andy Lamb								PRESENT				Suberites concinnus					iNaturalist:873889								Suberites concinnus							Animalia	Porifera	Demospongiae	Suberitida	Suberitidae	Suberites	concinnus		species		Lambe, 1895
	imerss.org:PMLS:8829			Count: few		Andy Lamb								PRESENT				Homaxinella amphispicula					iNaturalist:459847								Homaxinella amphispicula							Animalia	Porifera	Demospongiae	Suberitida	Suberitidae	Homaxinella	amphispicula		species		(de Laubenfels, 1961)
	imerss.org:PMLS:8830			Count: few		Andy Lamb								PRESENT				Amphilectus digitatus					iNaturalist:459874								Amphilectus digitatus							Animalia	Porifera	Demospongiae	Poecilosclerida	Esperiopsidae	Amphilectus	digitatus		species		(Miklucho-Maclay, 1870)
	imerss.org:PMLS:8831			Count: very many		Andy Lamb								PRESENT				Xestospongia hispida					iNaturalist:873856								Xestospongia hispida							Animalia	Porifera	Demospongiae	Haplosclerida	Petrosiidae	Xestospongia	hispida		species		(Ridley & Dendy, 1886)
	imerss.org:PMLS:8832			Count: abundant		Andy Lamb								PRESENT				Myxilla (Myxilla) lacunosa					iNaturalist:459826								Myxilla (Myxilla) lacunosa							Animalia	Porifera	Demospongiae	Poecilosclerida	Myxillidae	Myxilla	lacunosa		species		Lambe, 1893
	imerss.org:PMLS:8833			Count: few		Andy Lamb								PRESENT				Halichondria (Halichondria) bowerbanki					iNaturalist:120498								Halichondria (Halichondria) bowerbanki							Animalia	Porifera	Demospongiae	Suberitida	Halichondriidae	Halichondria	bowerbanki		species		Burton, 1930
	imerss.org:PMLS:8834			Count: few		Andy Lamb								PRESENT				Aplysilla polyraphis					iNaturalist:213993								Aplysilla polyraphis							Animalia	Porifera	Demospongiae	Dendroceratida	Darwinellidae	Aplysilla	polyraphis		species		de Laubenfels, 1930
	imerss.org:PMLS:8835			Count: some		Andy Lamb								PRESENT				Clathria (Microciona) pennata					iNaturalist:63672								Clathria (Microciona) pennata							Animalia	Porifera	Demospongiae	Poecilosclerida	Microcionidae	Clathria	pennata		species		(Lambe, 1895)
	imerss.org:PMLS:8836			Count: few		Andy Lamb								PRESENT				Myxilla (Myxilla) incrustans					iNaturalist:256019								Myxilla (Myxilla) incrustans							Animalia	Porifera	Demospongiae	Poecilosclerida	Myxillidae	Myxilla	incrustans		species		(Johnston, 1842)
	imerss.org:PMLS:8909			Count: few		Andy Lamb								PRESENT				Craniella villosa					iNaturalist:459732								Craniella villosa							Animalia	Porifera	Demospongiae	Tetractinellida	Tetillidae	Craniella	villosa		species		Lambe, 1893
	imerss.org:PMLS:8910			Count: some		Andy Lamb								PRESENT				Cliona californiana					iNaturalist:424811								Cliona californiana							Animalia	Porifera	Demospongiae	Clionaida	Clionaidae	Cliona	californiana		species		de Laubenfels, 1932
	imerss.org:PMLS:8911			Count: few		Andy Lamb								PRESENT				Suberites concinnus					iNaturalist:873889								Suberites concinnus							Animalia	Porifera	Demospongiae	Suberitida	Suberitidae	Suberites	concinnus		species		Lambe, 1895
	imerss.org:PMLS:8912			Count: few		Andy Lamb								PRESENT				Homaxinella amphispicula					iNaturalist:459847								Homaxinella amphispicula							Animalia	Porifera	Demospongiae	Suberitida	Suberitidae	Homaxinella	amphispicula		species		(de Laubenfels, 1961)
	imerss.org:PMLS:8913			Count: few		Andy Lamb								PRESENT				Pachychalina sp.					iNaturalist:873877								Pachychalina							Animalia	Porifera	Demospongiae	Haplosclerida	Niphatidae	Pachychalina			genus
	imerss.org:PMLS:8914			Count: few		Andy Lamb								PRESENT				Haliclona (Haliclona) sp.1					iNaturalist:1227076								Haliclona (Haliclona) sp.1							Animalia	Porifera	Demospongiae	Haplosclerida	Chalinidae	Haliclona	sp.1		species
	imerss.org:PMLS:8915			Count: many		Andy Lamb								PRESENT				Xestospongia hispida					iNaturalist:873856								Xestospongia hispida							Animalia	Porifera	Demospongiae	Haplosclerida	Petrosiidae	Xestospongia	hispida		species		(Ridley & Dendy, 1886)
	imerss.org:PMLS:8916			Count: abundant		Andy Lamb								PRESENT				Myxilla (Myxilla) lacunosa					iNaturalist:459826								Myxilla (Myxilla) lacunosa							Animalia	Porifera	Demospongiae	Poecilosclerida	Myxillidae	Myxilla	lacunosa		species		Lambe, 1893
	imerss.org:PMLS:8917					Andy Lamb		2						PRESENT				Aplysilla polyraphis					iNaturalist:213993								Aplysilla polyraphis							Animalia	Porifera	Demospongiae	Dendroceratida	Darwinellidae	Aplysilla	polyraphis		species		de Laubenfels, 1930
	imerss.org:PMLS:8918			Count: some		Andy Lamb								PRESENT				Clathria (Microciona) pennata					iNaturalist:63672								Clathria (Microciona) pennata							Animalia	Porifera	Demospongiae	Poecilosclerida	Microcionidae	Clathria	pennata		species		(Lambe, 1895)
	imerss.org:PMLS:8989			Count: some		Andy Lamb								PRESENT				Cliona californiana					iNaturalist:424811								Cliona californiana							Animalia	Porifera	Demospongiae	Clionaida	Clionaidae	Cliona	californiana		species		de Laubenfels, 1932
	imerss.org:PMLS:8990			Count: few		Andy Lamb								PRESENT				Homaxinella amphispicula					iNaturalist:459847								Homaxinella amphispicula							Animalia	Porifera	Demospongiae	Suberitida	Suberitidae	Homaxinella	amphispicula		species		(de Laubenfels, 1961)
	imerss.org:PMLS:8991			Count: few		Andy Lamb								PRESENT				Myxilla (Myxilla) lacunosa					iNaturalist:459826								Myxilla (Myxilla) lacunosa							Animalia	Porifera	Demospongiae	Poecilosclerida	Myxillidae	Myxilla	lacunosa		species		Lambe, 1893
	imerss.org:PMLS:8992			Count: some		Andy Lamb								PRESENT				Clathria (Microciona) pennata					iNaturalist:63672								Clathria (Microciona) pennata							Animalia	Porifera	Demospongiae	Poecilosclerida	Microcionidae	Clathria	pennata		species		(Lambe, 1895)
	imerss.org:PMLS:8993			Count: few		Andy Lamb								PRESENT				Myxilla (Myxilla) incrustans					iNaturalist:256019								Myxilla (Myxilla) incrustans							Animalia	Porifera	Demospongiae	Poecilosclerida	Myxillidae	Myxilla	incrustans		species		(Johnston, 1842)
	imerss.org:PMLS:8994			Count: few		Andy Lamb								PRESENT				Mycale (Aegogropila) adhaerens					iNaturalist:256010								Mycale (Aegogropila) adhaerens							Animalia	Porifera	Demospongiae	Poecilosclerida	Mycalidae	Mycale	adhaerens		species		(Lambe, 1893)
	imerss.org:PMLS:9070			Count: some		Andy Lamb								PRESENT				Cliona californiana					iNaturalist:424811								Cliona californiana							Animalia	Porifera	Demospongiae	Clionaida	Clionaidae	Cliona	californiana		species		de Laubenfels, 1932
	imerss.org:PMLS:9071			Count: few		Andy Lamb								PRESENT				Myxilla (Myxilla) lacunosa					iNaturalist:459826								Myxilla (Myxilla) lacunosa							Animalia	Porifera	Demospongiae	Poecilosclerida	Myxillidae	Myxilla	lacunosa		species		Lambe, 1893
	imerss.org:PMLS:9072			Count: many		Andy Lamb								PRESENT				Clathria (Microciona) pennata					iNaturalist:63672								Clathria (Microciona) pennata							Animalia	Porifera	Demospongiae	Poecilosclerida	Microcionidae	Clathria	pennata		species		(Lambe, 1895)
	imerss.org:PMLS:9073			Count: few		Andy Lamb								PRESENT				Myxilla (Myxilla) incrustans					iNaturalist:256019								Myxilla (Myxilla) incrustans							Animalia	Porifera	Demospongiae	Poecilosclerida	Myxillidae	Myxilla	incrustans		species		(Johnston, 1842)
	imerss.org:PMLS:9074			Count: few		Andy Lamb								PRESENT				Mycale (Aegogropila) adhaerens					iNaturalist:256010								Mycale (Aegogropila) adhaerens							Animalia	Porifera	Demospongiae	Poecilosclerida	Mycalidae	Mycale	adhaerens		species		(Lambe, 1893)
	imerss.org:PMLS:9165			Count: some		Andy Lamb								PRESENT				Cliona californiana					iNaturalist:424811								Cliona californiana							Animalia	Porifera	Demospongiae	Clionaida	Clionaidae	Cliona	californiana		species		de Laubenfels, 1932
	imerss.org:PMLS:9166			Count: few		Andy Lamb								PRESENT				Myxilla (Myxilla) lacunosa					iNaturalist:459826								Myxilla (Myxilla) lacunosa							Animalia	Porifera	Demospongiae	Poecilosclerida	Myxillidae	Myxilla	lacunosa		species		Lambe, 1893
	imerss.org:PMLS:9167			Count: many		Andy Lamb								PRESENT				Clathria (Microciona) pennata					iNaturalist:63672								Clathria (Microciona) pennata							Animalia	Porifera	Demospongiae	Poecilosclerida	Microcionidae	Clathria	pennata		species		(Lambe, 1895)
	imerss.org:PMLS:9168			Count: few		Andy Lamb								PRESENT				Myxilla (Myxilla) incrustans					iNaturalist:256019								Myxilla (Myxilla) incrustans							Animalia	Porifera	Demospongiae	Poecilosclerida	Myxillidae	Myxilla	incrustans		species		(Johnston, 1842)
	imerss.org:PMLS:9169			Count: few		Andy Lamb								PRESENT				Mycale (Aegogropila) adhaerens					iNaturalist:256010								Mycale (Aegogropila) adhaerens							Animalia	Porifera	Demospongiae	Poecilosclerida	Mycalidae	Mycale	adhaerens		species		(Lambe, 1893)
	imerss.org:PMLS:9245			Count: few		Andy Lamb								PRESENT				Leucilla nuttingi					iNaturalist:117713								Leucilla nuttingi							Animalia	Porifera	Calcarea	Leucosolenida	Amphoriscidae	Leucilla	nuttingi		species		(Urban, 1902)
	imerss.org:PMLS:9246			Count: some		Andy Lamb								PRESENT				Cliona californiana					iNaturalist:424811								Cliona californiana							Animalia	Porifera	Demospongiae	Clionaida	Clionaidae	Cliona	californiana		species		de Laubenfels, 1932
	imerss.org:PMLS:9247			Count: few		Andy Lamb								PRESENT				Homaxinella amphispicula					iNaturalist:459847								Homaxinella amphispicula							Animalia	Porifera	Demospongiae	Suberitida	Suberitidae	Homaxinella	amphispicula		species		(de Laubenfels, 1961)
	imerss.org:PMLS:9248			Count: some		Andy Lamb								PRESENT				Clathria (Microciona) pennata					iNaturalist:63672								Clathria (Microciona) pennata							Animalia	Porifera	Demospongiae	Poecilosclerida	Microcionidae	Clathria	pennata		species		(Lambe, 1895)
	imerss.org:PMLS:9249			Count: few		Andy Lamb								PRESENT				Myxilla (Myxilla) incrustans					iNaturalist:256019								Myxilla (Myxilla) incrustans							Animalia	Porifera	Demospongiae	Poecilosclerida	Myxillidae	Myxilla	incrustans		species		(Johnston, 1842)
	imerss.org:PMLS:9314			Count: many		Andy Lamb								PRESENT				Cliona californiana					iNaturalist:424811								Cliona californiana							Animalia	Porifera	Demospongiae	Clionaida	Clionaidae	Cliona	californiana		species		de Laubenfels, 1932
	imerss.org:PMLS:9315			Count: few		Andy Lamb								PRESENT				Myxilla (Myxilla) lacunosa					iNaturalist:459826								Myxilla (Myxilla) lacunosa							Animalia	Porifera	Demospongiae	Poecilosclerida	Myxillidae	Myxilla	lacunosa		species		Lambe, 1893
	imerss.org:PMLS:9316			Count: some		Andy Lamb								PRESENT				Hamigera sp.					iNaturalist:342247								Hamigera							Animalia	Porifera	Demospongiae	Poecilosclerida	Hymedesmiidae	Hamigera			genus
	imerss.org:PMLS:9317			Count: many		Andy Lamb								PRESENT				Clathria (Microciona) pennata					iNaturalist:63672								Clathria (Microciona) pennata							Animalia	Porifera	Demospongiae	Poecilosclerida	Microcionidae	Clathria	pennata		species		(Lambe, 1895)
	imerss.org:PMLS:9318			Count: few		Andy Lamb								PRESENT				Myxilla (Myxilla) incrustans					iNaturalist:256019								Myxilla (Myxilla) incrustans							Animalia	Porifera	Demospongiae	Poecilosclerida	Myxillidae	Myxilla	incrustans		species		(Johnston, 1842)
	imerss.org:PMLS:9319			Count: few		Andy Lamb								PRESENT				Mycale (Aegogropila) adhaerens					iNaturalist:256010								Mycale (Aegogropila) adhaerens							Animalia	Porifera	Demospongiae	Poecilosclerida	Mycalidae	Mycale	adhaerens		species		(Lambe, 1893)
	imerss.org:PMLS:9404			Count: many		Andy Lamb								PRESENT				Cliona californiana					iNaturalist:424811								Cliona californiana							Animalia	Porifera	Demospongiae	Clionaida	Clionaidae	Cliona	californiana		species		de Laubenfels, 1932
	imerss.org:PMLS:9405					Andy Lamb		1						PRESENT				Semisuberites cribrosa					iNaturalist:194571								Semisuberites cribrosa							Animalia	Porifera	Demospongiae	Poecilosclerida	Esperiopsidae	Semisuberites	cribrosa		species		(Miklucho-Maclay, 1870)
	imerss.org:PMLS:9406			Count: some		Andy Lamb								PRESENT				Myxilla (Myxilla) lacunosa					iNaturalist:459826								Myxilla (Myxilla) lacunosa							Animalia	Porifera	Demospongiae	Poecilosclerida	Myxillidae	Myxilla	lacunosa		species		Lambe, 1893
	imerss.org:PMLS:9407			Count: few		Andy Lamb								PRESENT				Haliclona (Haliclona) sp.2					iNaturalist:1227087								Haliclona (Haliclona) sp.2							Animalia	Porifera	Demospongiae	Haplosclerida	Chalinidae	Haliclona	sp.2		species
	imerss.org:PMLS:9408			Count: few		Andy Lamb								PRESENT				Hamigera sp.					iNaturalist:342247								Hamigera							Animalia	Porifera	Demospongiae	Poecilosclerida	Hymedesmiidae	Hamigera			genus
	imerss.org:PMLS:9409			Count: many		Andy Lamb								PRESENT				Clathria (Microciona) pennata					iNaturalist:63672								Clathria (Microciona) pennata							Animalia	Porifera	Demospongiae	Poecilosclerida	Microcionidae	Clathria	pennata		species		(Lambe, 1895)
	imerss.org:PMLS:9410			Count: few		Andy Lamb								PRESENT				Myxilla (Myxilla) incrustans					iNaturalist:256019								Myxilla (Myxilla) incrustans							Animalia	Porifera	Demospongiae	Poecilosclerida	Myxillidae	Myxilla	incrustans		species		(Johnston, 1842)
	imerss.org:PMLS:9411			Count: few		Andy Lamb								PRESENT				Mycale (Aegogropila) adhaerens					iNaturalist:256010								Mycale (Aegogropila) adhaerens							Animalia	Porifera	Demospongiae	Poecilosclerida	Mycalidae	Mycale	adhaerens		species		(Lambe, 1893)
	imerss.org:PMLS:9511			Count: few		Andy Lamb								PRESENT				Leucilla nuttingi					iNaturalist:117713								Leucilla nuttingi							Animalia	Porifera	Calcarea	Leucosolenida	Amphoriscidae	Leucilla	nuttingi		species		(Urban, 1902)
	imerss.org:PMLS:9512					Andy Lamb		1						PRESENT				Polymastia pachymastia					iNaturalist:117717								Polymastia pachymastia							Animalia	Porifera	Demospongiae	Polymastiida	Polymastiidae	Polymastia	pachymastia		species		de Laubenfels, 1932
	imerss.org:PMLS:9513			Count: abundant		Andy Lamb								PRESENT				Cliona californiana					iNaturalist:424811								Cliona californiana							Animalia	Porifera	Demospongiae	Clionaida	Clionaidae	Cliona	californiana		species		de Laubenfels, 1932
	imerss.org:PMLS:9514			Count: few		Andy Lamb								PRESENT				Hamigera sp.					iNaturalist:342247								Hamigera							Animalia	Porifera	Demospongiae	Poecilosclerida	Hymedesmiidae	Hamigera			genus
	imerss.org:PMLS:9515			Count: some		Andy Lamb								PRESENT				Clathria (Microciona) pennata					iNaturalist:63672								Clathria (Microciona) pennata							Animalia	Porifera	Demospongiae	Poecilosclerida	Microcionidae	Clathria	pennata		species		(Lambe, 1895)
	imerss.org:PMLS:9516			Count: many		Andy Lamb								PRESENT				Myxilla (Myxilla) incrustans					iNaturalist:256019								Myxilla (Myxilla) incrustans							Animalia	Porifera	Demospongiae	Poecilosclerida	Myxillidae	Myxilla	incrustans		species		(Johnston, 1842)
	imerss.org:PMLS:9517			Count: many		Andy Lamb								PRESENT				Mycale (Aegogropila) adhaerens					iNaturalist:256010								Mycale (Aegogropila) adhaerens							Animalia	Porifera	Demospongiae	Poecilosclerida	Mycalidae	Mycale	adhaerens		species		(Lambe, 1893)
	imerss.org:PMLS:9618			Count: some		Andy Lamb								PRESENT				Leucilla nuttingi					iNaturalist:117713								Leucilla nuttingi							Animalia	Porifera	Calcarea	Leucosolenida	Amphoriscidae	Leucilla	nuttingi		species		(Urban, 1902)
	imerss.org:PMLS:9619					Andy Lamb		1						PRESENT				Craniella villosa					iNaturalist:459732								Craniella villosa							Animalia	Porifera	Demospongiae	Tetractinellida	Tetillidae	Craniella	villosa		species		Lambe, 1893
	imerss.org:PMLS:9620			Count: some		Andy Lamb								PRESENT				Polymastia pachymastia					iNaturalist:117717								Polymastia pachymastia							Animalia	Porifera	Demospongiae	Polymastiida	Polymastiidae	Polymastia	pachymastia		species		de Laubenfels, 1932
	imerss.org:PMLS:9621			Count: very many		Andy Lamb								PRESENT				Cliona californiana					iNaturalist:424811								Cliona californiana							Animalia	Porifera	Demospongiae	Clionaida	Clionaidae	Cliona	californiana		species		de Laubenfels, 1932
	imerss.org:PMLS:9622			Count: few		Andy Lamb								PRESENT				Halichondria (Halichondria) bowerbanki					iNaturalist:120498								Halichondria (Halichondria) bowerbanki							Animalia	Porifera	Demospongiae	Suberitida	Halichondriidae	Halichondria	bowerbanki		species		Burton, 1930
	imerss.org:PMLS:9623			Count: few		Andy Lamb								PRESENT				Hamigera sp.					iNaturalist:342247								Hamigera							Animalia	Porifera	Demospongiae	Poecilosclerida	Hymedesmiidae	Hamigera			genus
	imerss.org:PMLS:9624			Count: few		Andy Lamb								PRESENT				Aplysilla sp. nov.					iNaturalist:63646								Aplysilla							Animalia	Porifera	Demospongiae	Dendroceratida	Darwinellidae	Aplysilla			genus
	imerss.org:PMLS:9625			Count: some		Andy Lamb								PRESENT				Clathria (Microciona) pennata					iNaturalist:63672								Clathria (Microciona) pennata							Animalia	Porifera	Demospongiae	Poecilosclerida	Microcionidae	Clathria	pennata		species		(Lambe, 1895)
	imerss.org:PMLS:9626			Count: many		Andy Lamb								PRESENT				Myxilla (Myxilla) incrustans					iNaturalist:256019								Myxilla (Myxilla) incrustans							Animalia	Porifera	Demospongiae	Poecilosclerida	Myxillidae	Myxilla	incrustans		species		(Johnston, 1842)
	imerss.org:PMLS:9627			Count: many		Andy Lamb								PRESENT				Mycale (Aegogropila) adhaerens					iNaturalist:256010								Mycale (Aegogropila) adhaerens							Animalia	Porifera	Demospongiae	Poecilosclerida	Mycalidae	Mycale	adhaerens		species		(Lambe, 1893)
	imerss.org:PMLS:9744					Andy Lamb		1						PRESENT				Polymastia pachymastia					iNaturalist:117717								Polymastia pachymastia							Animalia	Porifera	Demospongiae	Polymastiida	Polymastiidae	Polymastia	pachymastia		species		de Laubenfels, 1932
	imerss.org:PMLS:9745			Count: very many		Andy Lamb								PRESENT				Cliona californiana					iNaturalist:424811								Cliona californiana							Animalia	Porifera	Demospongiae	Clionaida	Clionaidae	Cliona	californiana		species		de Laubenfels, 1932
	imerss.org:PMLS:9746			Count: few		Andy Lamb								PRESENT				Homaxinella amphispicula					iNaturalist:459847								Homaxinella amphispicula							Animalia	Porifera	Demospongiae	Suberitida	Suberitidae	Homaxinella	amphispicula		species		(de Laubenfels, 1961)
	imerss.org:PMLS:9747			Count: some		Andy Lamb								PRESENT				Myxilla (Myxilla) lacunosa					iNaturalist:459826								Myxilla (Myxilla) lacunosa							Animalia	Porifera	Demospongiae	Poecilosclerida	Myxillidae	Myxilla	lacunosa		species		Lambe, 1893
	imerss.org:PMLS:9748			Count: very many		Andy Lamb								PRESENT				Clathria (Microciona) pennata					iNaturalist:63672								Clathria (Microciona) pennata							Animalia	Porifera	Demospongiae	Poecilosclerida	Microcionidae	Clathria	pennata		species		(Lambe, 1895)
	imerss.org:PMLS:9749			Count: some		Andy Lamb								PRESENT				Myxilla (Myxilla) incrustans					iNaturalist:256019								Myxilla (Myxilla) incrustans							Animalia	Porifera	Demospongiae	Poecilosclerida	Myxillidae	Myxilla	incrustans		species		(Johnston, 1842)
	imerss.org:PMLS:9750			Count: some		Andy Lamb								PRESENT				Mycale (Aegogropila) adhaerens					iNaturalist:256010								Mycale (Aegogropila) adhaerens							Animalia	Porifera	Demospongiae	Poecilosclerida	Mycalidae	Mycale	adhaerens		species		(Lambe, 1893)
	imerss.org:PMLS:9865			Count: very many		Andy Lamb								PRESENT				Cliona californiana					iNaturalist:424811								Cliona californiana							Animalia	Porifera	Demospongiae	Clionaida	Clionaidae	Cliona	californiana		species		de Laubenfels, 1932
	imerss.org:PMLS:9866			Count: few		Andy Lamb								PRESENT				Myxilla (Myxilla) lacunosa					iNaturalist:459826								Myxilla (Myxilla) lacunosa							Animalia	Porifera	Demospongiae	Poecilosclerida	Myxillidae	Myxilla	lacunosa		species		Lambe, 1893
	imerss.org:PMLS:9867			Count: many		Andy Lamb								PRESENT				Clathria (Microciona) pennata					iNaturalist:63672								Clathria (Microciona) pennata							Animalia	Porifera	Demospongiae	Poecilosclerida	Microcionidae	Clathria	pennata		species		(Lambe, 1895)
	imerss.org:PMLS:9868			Count: few		Andy Lamb								PRESENT				Myxilla (Myxilla) incrustans					iNaturalist:256019								Myxilla (Myxilla) incrustans							Animalia	Porifera	Demospongiae	Poecilosclerida	Myxillidae	Myxilla	incrustans		species		(Johnston, 1842)
	imerss.org:PMLS:9869			Count: few		Andy Lamb								PRESENT				Mycale (Aegogropila) adhaerens					iNaturalist:256010								Mycale (Aegogropila) adhaerens							Animalia	Porifera	Demospongiae	Poecilosclerida	Mycalidae	Mycale	adhaerens		species		(Lambe, 1893)
	imerss.org:PMLS:9971			Count: some		Andy Lamb								PRESENT				Cliona californiana					iNaturalist:424811								Cliona californiana							Animalia	Porifera	Demospongiae	Clionaida	Clionaidae	Cliona	californiana		species		de Laubenfels, 1932
	imerss.org:PMLS:9972			Count: few		Andy Lamb								PRESENT				Myxilla (Myxilla) lacunosa					iNaturalist:459826								Myxilla (Myxilla) lacunosa							Animalia	Porifera	Demospongiae	Poecilosclerida	Myxillidae	Myxilla	lacunosa		species		Lambe, 1893
	imerss.org:PMLS:9973			Count: many		Andy Lamb								PRESENT				Clathria (Microciona) pennata					iNaturalist:63672								Clathria (Microciona) pennata							Animalia	Porifera	Demospongiae	Poecilosclerida	Microcionidae	Clathria	pennata		species		(Lambe, 1895)
	imerss.org:PMLS:9974			Count: few		Andy Lamb								PRESENT				Myxilla (Myxilla) incrustans					iNaturalist:256019								Myxilla (Myxilla) incrustans							Animalia	Porifera	Demospongiae	Poecilosclerida	Myxillidae	Myxilla	incrustans		species		(Johnston, 1842)
	imerss.org:PMLS:9975			Count: few		Andy Lamb								PRESENT				Mycale (Aegogropila) adhaerens					iNaturalist:256010								Mycale (Aegogropila) adhaerens							Animalia	Porifera	Demospongiae	Poecilosclerida	Mycalidae	Mycale	adhaerens		species		(Lambe, 1893)
	imerss.org:PMLS:10080			Count: many		Andy Lamb								PRESENT				Cliona californiana					iNaturalist:424811								Cliona californiana							Animalia	Porifera	Demospongiae	Clionaida	Clionaidae	Cliona	californiana		species		de Laubenfels, 1932
	imerss.org:PMLS:10081			Count: some		Andy Lamb								PRESENT				Myxilla (Myxilla) lacunosa					iNaturalist:459826								Myxilla (Myxilla) lacunosa							Animalia	Porifera	Demospongiae	Poecilosclerida	Myxillidae	Myxilla	lacunosa		species		Lambe, 1893
	imerss.org:PMLS:10082			Count: few		Andy Lamb								PRESENT				Halichondria (Halichondria) bowerbanki					iNaturalist:120498								Halichondria (Halichondria) bowerbanki							Animalia	Porifera	Demospongiae	Suberitida	Halichondriidae	Halichondria	bowerbanki		species		Burton, 1930
	imerss.org:PMLS:10083			Count: few		Andy Lamb								PRESENT				Haliclona (Haliclona) sp.2					iNaturalist:1227087								Haliclona (Haliclona) sp.2							Animalia	Porifera	Demospongiae	Haplosclerida	Chalinidae	Haliclona	sp.2		species
	imerss.org:PMLS:10084			Count: few		Andy Lamb								PRESENT				Aplysilla sp. nov.					iNaturalist:63646								Aplysilla							Animalia	Porifera	Demospongiae	Dendroceratida	Darwinellidae	Aplysilla			genus
	imerss.org:PMLS:10085			Count: some		Andy Lamb								PRESENT				Clathria (Microciona) pennata					iNaturalist:63672								Clathria (Microciona) pennata							Animalia	Porifera	Demospongiae	Poecilosclerida	Microcionidae	Clathria	pennata		species		(Lambe, 1895)
	imerss.org:PMLS:10086			Count: few		Andy Lamb								PRESENT				Mycale (Aegogropila) adhaerens					iNaturalist:256010								Mycale (Aegogropila) adhaerens							Animalia	Porifera	Demospongiae	Poecilosclerida	Mycalidae	Mycale	adhaerens		species		(Lambe, 1893)
	imerss.org:PMLS:10171			Count: abundant		Andy Lamb								PRESENT				Cliona californiana					iNaturalist:424811								Cliona californiana							Animalia	Porifera	Demospongiae	Clionaida	Clionaidae	Cliona	californiana		species		de Laubenfels, 1932
	imerss.org:PMLS:10172			Count: abundant		Andy Lamb								PRESENT				Myxilla (Myxilla) lacunosa					iNaturalist:459826								Myxilla (Myxilla) lacunosa							Animalia	Porifera	Demospongiae	Poecilosclerida	Myxillidae	Myxilla	lacunosa		species		Lambe, 1893
	imerss.org:PMLS:10173			Count: few		Andy Lamb								PRESENT				Aplysilla sp. nov.					iNaturalist:63646								Aplysilla							Animalia	Porifera	Demospongiae	Dendroceratida	Darwinellidae	Aplysilla			genus
	imerss.org:PMLS:10174			Count: very many		Andy Lamb								PRESENT				Clathria (Microciona) pennata					iNaturalist:63672								Clathria (Microciona) pennata							Animalia	Porifera	Demospongiae	Poecilosclerida	Microcionidae	Clathria	pennata		species		(Lambe, 1895)
	imerss.org:PMLS:10249			Count: some		Andy Lamb								PRESENT				Cliona californiana					iNaturalist:424811								Cliona californiana							Animalia	Porifera	Demospongiae	Clionaida	Clionaidae	Cliona	californiana		species		de Laubenfels, 1932
	imerss.org:PMLS:10250			Count: few		Andy Lamb								PRESENT				Myxilla (Myxilla) lacunosa					iNaturalist:459826								Myxilla (Myxilla) lacunosa							Animalia	Porifera	Demospongiae	Poecilosclerida	Myxillidae	Myxilla	lacunosa		species		Lambe, 1893
	imerss.org:PMLS:10251			Count: some		Andy Lamb								PRESENT				Clathria (Microciona) pennata					iNaturalist:63672								Clathria (Microciona) pennata							Animalia	Porifera	Demospongiae	Poecilosclerida	Microcionidae	Clathria	pennata		species		(Lambe, 1895)
	imerss.org:PMLS:10252					Andy Lamb		2						PRESENT				Mycale (Aegogropila) adhaerens					iNaturalist:256010								Mycale (Aegogropila) adhaerens							Animalia	Porifera	Demospongiae	Poecilosclerida	Mycalidae	Mycale	adhaerens		species		(Lambe, 1893)
	imerss.org:PMLS:10319			Count: some		Andy Lamb								PRESENT				Sycon spp.					iNaturalist:347738								Sycon							Animalia	Porifera	Calcarea	Leucosolenida	Sycettidae	Sycon			genus
	imerss.org:PMLS:10320			Count: some		Andy Lamb								PRESENT				Cliona californiana					iNaturalist:424811								Cliona californiana							Animalia	Porifera	Demospongiae	Clionaida	Clionaidae	Cliona	californiana		species		de Laubenfels, 1932
	imerss.org:PMLS:10321			Count: some		Andy Lamb								PRESENT				Clathria (Microciona) pennata					iNaturalist:63672								Clathria (Microciona) pennata							Animalia	Porifera	Demospongiae	Poecilosclerida	Microcionidae	Clathria	pennata		species		(Lambe, 1895)
	imerss.org:PMLS:10408			Count: many		Andy Lamb								PRESENT				Cliona californiana					iNaturalist:424811								Cliona californiana							Animalia	Porifera	Demospongiae	Clionaida	Clionaidae	Cliona	californiana		species		de Laubenfels, 1932
	imerss.org:PMLS:10409			Count: many		Andy Lamb								PRESENT				Clathria (Microciona) pennata					iNaturalist:63672								Clathria (Microciona) pennata							Animalia	Porifera	Demospongiae	Poecilosclerida	Microcionidae	Clathria	pennata		species		(Lambe, 1895)
	imerss.org:PMLS:10410					Andy Lamb		1						PRESENT				Mycale (Aegogropila) adhaerens					iNaturalist:256010								Mycale (Aegogropila) adhaerens							Animalia	Porifera	Demospongiae	Poecilosclerida	Mycalidae	Mycale	adhaerens		species		(Lambe, 1893)
	imerss.org:PMLS:10499			Count: many		Andy Lamb								PRESENT				Clathria (Microciona) pennata					iNaturalist:63672								Clathria (Microciona) pennata							Animalia	Porifera	Demospongiae	Poecilosclerida	Microcionidae	Clathria	pennata		species		(Lambe, 1895)
	imerss.org:PMLS:10540			Count: some		Andy Lamb								PRESENT				Cliona californiana					iNaturalist:424811								Cliona californiana							Animalia	Porifera	Demospongiae	Clionaida	Clionaidae	Cliona	californiana		species		de Laubenfels, 1932
	imerss.org:PMLS:10541					Andy Lamb		1						PRESENT				Myxilla (Myxilla) lacunosa					iNaturalist:459826								Myxilla (Myxilla) lacunosa							Animalia	Porifera	Demospongiae	Poecilosclerida	Myxillidae	Myxilla	lacunosa		species		Lambe, 1893
	imerss.org:PMLS:10542			Count: few		Andy Lamb								PRESENT				Halichondria (Halichondria) bowerbanki					iNaturalist:120498								Halichondria (Halichondria) bowerbanki							Animalia	Porifera	Demospongiae	Suberitida	Halichondriidae	Halichondria	bowerbanki		species		Burton, 1930
	imerss.org:PMLS:10543			Count: few		Andy Lamb								PRESENT				Haliclona (Haliclona) sp.2					iNaturalist:1227087								Haliclona (Haliclona) sp.2							Animalia	Porifera	Demospongiae	Haplosclerida	Chalinidae	Haliclona	sp.2		species
	imerss.org:PMLS:10544			Count: some		Andy Lamb								PRESENT				Clathria (Microciona) pennata					iNaturalist:63672								Clathria (Microciona) pennata							Animalia	Porifera	Demospongiae	Poecilosclerida	Microcionidae	Clathria	pennata		species		(Lambe, 1895)
	imerss.org:PMLS:10660			Count: few		Andy Lamb								PRESENT				Sycon spp.					iNaturalist:347738								Sycon							Animalia	Porifera	Calcarea	Leucosolenida	Sycettidae	Sycon			genus
	imerss.org:PMLS:10661					Andy Lamb		1						PRESENT				Polymastia pachymastia					iNaturalist:117717								Polymastia pachymastia							Animalia	Porifera	Demospongiae	Polymastiida	Polymastiidae	Polymastia	pachymastia		species		de Laubenfels, 1932
	imerss.org:PMLS:10662			Count: some		Andy Lamb								PRESENT				Cliona californiana					iNaturalist:424811								Cliona californiana							Animalia	Porifera	Demospongiae	Clionaida	Clionaidae	Cliona	californiana		species		de Laubenfels, 1932
	imerss.org:PMLS:10663					Andy Lamb		1						PRESENT				Homaxinella amphispicula					iNaturalist:459847								Homaxinella amphispicula							Animalia	Porifera	Demospongiae	Suberitida	Suberitidae	Homaxinella	amphispicula		species		(de Laubenfels, 1961)
	imerss.org:PMLS:10664			Count: some		Andy Lamb								PRESENT				Clathria (Microciona) pennata					iNaturalist:63672								Clathria (Microciona) pennata							Animalia	Porifera	Demospongiae	Poecilosclerida	Microcionidae	Clathria	pennata		species		(Lambe, 1895)
	imerss.org:PMLS:10665			Count: few		Andy Lamb								PRESENT				Myxilla (Myxilla) incrustans					iNaturalist:256019								Myxilla (Myxilla) incrustans							Animalia	Porifera	Demospongiae	Poecilosclerida	Myxillidae	Myxilla	incrustans		species		(Johnston, 1842)
	imerss.org:PMLS:10794			Count: some		Andy Lamb								PRESENT				Sycon spp.					iNaturalist:347738								Sycon							Animalia	Porifera	Calcarea	Leucosolenida	Sycettidae	Sycon			genus
	imerss.org:PMLS:10795			Count: very many		Andy Lamb								PRESENT				Craniella villosa					iNaturalist:459732								Craniella villosa							Animalia	Porifera	Demospongiae	Tetractinellida	Tetillidae	Craniella	villosa		species		Lambe, 1893
	imerss.org:PMLS:10796			Count: many		Andy Lamb								PRESENT				Polymastia pachymastia					iNaturalist:117717								Polymastia pachymastia							Animalia	Porifera	Demospongiae	Polymastiida	Polymastiidae	Polymastia	pachymastia		species		de Laubenfels, 1932
	imerss.org:PMLS:10797			Count: very many		Andy Lamb								PRESENT				Cliona californiana					iNaturalist:424811								Cliona californiana							Animalia	Porifera	Demospongiae	Clionaida	Clionaidae	Cliona	californiana		species		de Laubenfels, 1932
	imerss.org:PMLS:10798					Andy Lamb		1						PRESENT				Semisuberites cribrosa					iNaturalist:194571								Semisuberites cribrosa							Animalia	Porifera	Demospongiae	Poecilosclerida	Esperiopsidae	Semisuberites	cribrosa		species		(Miklucho-Maclay, 1870)
	imerss.org:PMLS:10799					Andy Lamb		1						PRESENT				Xestospongia hispida					iNaturalist:873856								Xestospongia hispida							Animalia	Porifera	Demospongiae	Haplosclerida	Petrosiidae	Xestospongia	hispida		species		(Ridley & Dendy, 1886)
	imerss.org:PMLS:10800			Count: few		Andy Lamb								PRESENT				Halichondria (Halichondria) bowerbanki					iNaturalist:120498								Halichondria (Halichondria) bowerbanki							Animalia	Porifera	Demospongiae	Suberitida	Halichondriidae	Halichondria	bowerbanki		species		Burton, 1930
	imerss.org:PMLS:10801			Count: few		Andy Lamb								PRESENT				Haliclona (Haliclona) sp.2					iNaturalist:1227087								Haliclona (Haliclona) sp.2							Animalia	Porifera	Demospongiae	Haplosclerida	Chalinidae	Haliclona	sp.2		species
	imerss.org:PMLS:10802			Count: some		Andy Lamb								PRESENT				Clathria (Microciona) pennata					iNaturalist:63672								Clathria (Microciona) pennata							Animalia	Porifera	Demospongiae	Poecilosclerida	Microcionidae	Clathria	pennata		species		(Lambe, 1895)
	imerss.org:PMLS:10803			Count: few		Andy Lamb								PRESENT				Myxilla (Myxilla) incrustans					iNaturalist:256019								Myxilla (Myxilla) incrustans							Animalia	Porifera	Demospongiae	Poecilosclerida	Myxillidae	Myxilla	incrustans		species		(Johnston, 1842)
	imerss.org:PMLS:10949			Count: very many		Andy Lamb								PRESENT				Leucilla nuttingi					iNaturalist:117713								Leucilla nuttingi							Animalia	Porifera	Calcarea	Leucosolenida	Amphoriscidae	Leucilla	nuttingi		species		(Urban, 1902)
	imerss.org:PMLS:10950			Count: some		Andy Lamb								PRESENT				Craniella villosa					iNaturalist:459732								Craniella villosa							Animalia	Porifera	Demospongiae	Tetractinellida	Tetillidae	Craniella	villosa		species		Lambe, 1893
	imerss.org:PMLS:10951			Count: few		Andy Lamb								PRESENT				Polymastia pachymastia					iNaturalist:117717								Polymastia pachymastia							Animalia	Porifera	Demospongiae	Polymastiida	Polymastiidae	Polymastia	pachymastia		species		de Laubenfels, 1932
	imerss.org:PMLS:10952			Count: very many		Andy Lamb								PRESENT				Cliona californiana					iNaturalist:424811								Cliona californiana							Animalia	Porifera	Demospongiae	Clionaida	Clionaidae	Cliona	californiana		species		de Laubenfels, 1932
	imerss.org:PMLS:10953			Count: few		Andy Lamb								PRESENT				Xestospongia hispida					iNaturalist:873856								Xestospongia hispida							Animalia	Porifera	Demospongiae	Haplosclerida	Petrosiidae	Xestospongia	hispida		species		(Ridley & Dendy, 1886)
	imerss.org:PMLS:10954					Andy Lamb		1						PRESENT				Myxilla (Myxilla) lacunosa					iNaturalist:459826								Myxilla (Myxilla) lacunosa							Animalia	Porifera	Demospongiae	Poecilosclerida	Myxillidae	Myxilla	lacunosa		species		Lambe, 1893
	imerss.org:PMLS:10955			Count: few		Andy Lamb								PRESENT				Halichondria (Halichondria) bowerbanki					iNaturalist:120498								Halichondria (Halichondria) bowerbanki							Animalia	Porifera	Demospongiae	Suberitida	Halichondriidae	Halichondria	bowerbanki		species		Burton, 1930
	imerss.org:PMLS:10956			Count: some		Andy Lamb								PRESENT				Haliclona (Haliclona) sp.2					iNaturalist:1227087								Haliclona (Haliclona) sp.2							Animalia	Porifera	Demospongiae	Haplosclerida	Chalinidae	Haliclona	sp.2		species
	imerss.org:PMLS:10957			Count: some		Andy Lamb								PRESENT				Clathria (Microciona) pennata					iNaturalist:63672								Clathria (Microciona) pennata							Animalia	Porifera	Demospongiae	Poecilosclerida	Microcionidae	Clathria	pennata		species		(Lambe, 1895)
	imerss.org:PMLS:10958					Andy Lamb		2						PRESENT				Myxilla (Myxilla) incrustans					iNaturalist:256019								Myxilla (Myxilla) incrustans							Animalia	Porifera	Demospongiae	Poecilosclerida	Myxillidae	Myxilla	incrustans		species		(Johnston, 1842)
	imerss.org:PMLS:11096			Count: many		Andy Lamb								PRESENT				Cliona californiana					iNaturalist:424811								Cliona californiana							Animalia	Porifera	Demospongiae	Clionaida	Clionaidae	Cliona	californiana		species		de Laubenfels, 1932
	imerss.org:PMLS:11097			Count: few		Andy Lamb								PRESENT				Myxilla (Myxilla) lacunosa					iNaturalist:459826								Myxilla (Myxilla) lacunosa							Animalia	Porifera	Demospongiae	Poecilosclerida	Myxillidae	Myxilla	lacunosa		species		Lambe, 1893
	imerss.org:PMLS:11098			Count: few		Andy Lamb								PRESENT				Haliclona (Haliclona) sp.2					iNaturalist:1227087								Haliclona (Haliclona) sp.2							Animalia	Porifera	Demospongiae	Haplosclerida	Chalinidae	Haliclona	sp.2		species
	imerss.org:PMLS:11099			Count: many		Andy Lamb								PRESENT				Clathria (Microciona) pennata					iNaturalist:63672								Clathria (Microciona) pennata							Animalia	Porifera	Demospongiae	Poecilosclerida	Microcionidae	Clathria	pennata		species		(Lambe, 1895)
	imerss.org:PMLS:11100			Count: few		Andy Lamb								PRESENT				Myxilla (Myxilla) incrustans					iNaturalist:256019								Myxilla (Myxilla) incrustans							Animalia	Porifera	Demospongiae	Poecilosclerida	Myxillidae	Myxilla	incrustans		species		(Johnston, 1842)
	imerss.org:PMLS:11184			Count: few		Andy Lamb								PRESENT				Sycon spp.					iNaturalist:347738								Sycon							Animalia	Porifera	Calcarea	Leucosolenida	Sycettidae	Sycon			genus
	imerss.org:PMLS:11185			Count: some		Andy Lamb								PRESENT				Cliona californiana					iNaturalist:424811								Cliona californiana							Animalia	Porifera	Demospongiae	Clionaida	Clionaidae	Cliona	californiana		species		de Laubenfels, 1932
	imerss.org:PMLS:11186			Count: few		Andy Lamb								PRESENT				Hamigera sp.					iNaturalist:342247								Hamigera							Animalia	Porifera	Demospongiae	Poecilosclerida	Hymedesmiidae	Hamigera			genus
	imerss.org:PMLS:11270			Count: some		Andy Lamb								PRESENT				Leucosolenia eleanor					iNaturalist:424817								Leucosolenia eleanor							Animalia	Porifera	Calcarea	Leucosolenida	Leucosoleniidae	Leucosolenia	eleanor		species		Urban, 1906
	imerss.org:PMLS:11271			Count: very many		Andy Lamb								PRESENT				Cliona californiana					iNaturalist:424811								Cliona californiana							Animalia	Porifera	Demospongiae	Clionaida	Clionaidae	Cliona	californiana		species		de Laubenfels, 1932
	imerss.org:PMLS:11272			Count: many		Andy Lamb								PRESENT				Clathria (Microciona) pennata					iNaturalist:63672								Clathria (Microciona) pennata							Animalia	Porifera	Demospongiae	Poecilosclerida	Microcionidae	Clathria	pennata		species		(Lambe, 1895)
	imerss.org:PMLS:11273			Count: few		Andy Lamb								PRESENT				Myxilla (Myxilla) incrustans					iNaturalist:256019								Myxilla (Myxilla) incrustans							Animalia	Porifera	Demospongiae	Poecilosclerida	Myxillidae	Myxilla	incrustans		species		(Johnston, 1842)
	imerss.org:PMLS:11405			Count: some		Andy Lamb								PRESENT				Sycon spp.					iNaturalist:347738								Sycon							Animalia	Porifera	Calcarea	Leucosolenida	Sycettidae	Sycon			genus
	imerss.org:PMLS:11406			Count: some		Andy Lamb								PRESENT				Cliona californiana					iNaturalist:424811								Cliona californiana							Animalia	Porifera	Demospongiae	Clionaida	Clionaidae	Cliona	californiana		species		de Laubenfels, 1932
	imerss.org:PMLS:11407					Andy Lamb		1						PRESENT				Semisuberites cribrosa					iNaturalist:194571								Semisuberites cribrosa							Animalia	Porifera	Demospongiae	Poecilosclerida	Esperiopsidae	Semisuberites	cribrosa		species		(Miklucho-Maclay, 1870)
	imerss.org:PMLS:11408			Count: few		Andy Lamb								PRESENT				Homaxinella amphispicula					iNaturalist:459847								Homaxinella amphispicula							Animalia	Porifera	Demospongiae	Suberitida	Suberitidae	Homaxinella	amphispicula		species		(de Laubenfels, 1961)
	imerss.org:PMLS:11409			Count: some		Andy Lamb								PRESENT				Clathria (Microciona) pennata					iNaturalist:63672								Clathria (Microciona) pennata							Animalia	Porifera	Demospongiae	Poecilosclerida	Microcionidae	Clathria	pennata		species		(Lambe, 1895)
	imerss.org:PMLS:11504			Count: some		Andy Lamb								PRESENT				Leucosolenia eleanor					iNaturalist:424817								Leucosolenia eleanor							Animalia	Porifera	Calcarea	Leucosolenida	Leucosoleniidae	Leucosolenia	eleanor		species		Urban, 1906
	imerss.org:PMLS:11505					Andy Lamb		1						PRESENT				Polymastia pachymastia					iNaturalist:117717								Polymastia pachymastia							Animalia	Porifera	Demospongiae	Polymastiida	Polymastiidae	Polymastia	pachymastia		species		de Laubenfels, 1932
	imerss.org:PMLS:11506			Count: some		Andy Lamb								PRESENT				Cliona californiana					iNaturalist:424811								Cliona californiana							Animalia	Porifera	Demospongiae	Clionaida	Clionaidae	Cliona	californiana		species		de Laubenfels, 1932
	imerss.org:PMLS:11507			Count: few		Andy Lamb								PRESENT				Myxilla (Myxilla) lacunosa					iNaturalist:459826								Myxilla (Myxilla) lacunosa							Animalia	Porifera	Demospongiae	Poecilosclerida	Myxillidae	Myxilla	lacunosa		species		Lambe, 1893
	imerss.org:PMLS:11508			Count: some		Andy Lamb								PRESENT				Clathria (Microciona) pennata					iNaturalist:63672								Clathria (Microciona) pennata							Animalia	Porifera	Demospongiae	Poecilosclerida	Microcionidae	Clathria	pennata		species		(Lambe, 1895)
	imerss.org:PMLS:11596			Count: some		Andy Lamb								PRESENT				Sycon spp.					iNaturalist:347738								Sycon							Animalia	Porifera	Calcarea	Leucosolenida	Sycettidae	Sycon			genus
	imerss.org:PMLS:11597			Count: very many		Andy Lamb								PRESENT				Leucosolenia eleanor					iNaturalist:424817								Leucosolenia eleanor							Animalia	Porifera	Calcarea	Leucosolenida	Leucosoleniidae	Leucosolenia	eleanor		species		Urban, 1906
	imerss.org:PMLS:11598					Andy Lamb		1						PRESENT				Craniella villosa					iNaturalist:459732								Craniella villosa							Animalia	Porifera	Demospongiae	Tetractinellida	Tetillidae	Craniella	villosa		species		Lambe, 1893
	imerss.org:PMLS:11599			Count: some		Andy Lamb								PRESENT				Cliona californiana					iNaturalist:424811								Cliona californiana							Animalia	Porifera	Demospongiae	Clionaida	Clionaidae	Cliona	californiana		species		de Laubenfels, 1932
	imerss.org:PMLS:11600					Andy Lamb		2						PRESENT				Myxilla (Myxilla) lacunosa					iNaturalist:459826								Myxilla (Myxilla) lacunosa							Animalia	Porifera	Demospongiae	Poecilosclerida	Myxillidae	Myxilla	lacunosa		species		Lambe, 1893
	imerss.org:PMLS:11601			Count: few		Andy Lamb								PRESENT				Halichondria (Halichondria) bowerbanki					iNaturalist:120498								Halichondria (Halichondria) bowerbanki							Animalia	Porifera	Demospongiae	Suberitida	Halichondriidae	Halichondria	bowerbanki		species		Burton, 1930
	imerss.org:PMLS:11602			Count: some		Andy Lamb								PRESENT				Hamigera sp.					iNaturalist:342247								Hamigera							Animalia	Porifera	Demospongiae	Poecilosclerida	Hymedesmiidae	Hamigera			genus
	imerss.org:PMLS:11603			Count: some		Andy Lamb								PRESENT				Clathria (Microciona) pennata					iNaturalist:63672								Clathria (Microciona) pennata							Animalia	Porifera	Demospongiae	Poecilosclerida	Microcionidae	Clathria	pennata		species		(Lambe, 1895)
	imerss.org:PMLS:11604			Count: few		Andy Lamb								PRESENT				Myxilla (Myxilla) incrustans					iNaturalist:256019								Myxilla (Myxilla) incrustans							Animalia	Porifera	Demospongiae	Poecilosclerida	Myxillidae	Myxilla	incrustans		species		(Johnston, 1842)
	imerss.org:PMLS:11703			Count: some		Andy Lamb								PRESENT				Sycon spp.					iNaturalist:347738								Sycon							Animalia	Porifera	Calcarea	Leucosolenida	Sycettidae	Sycon			genus
	imerss.org:PMLS:11704			Count: many		Andy Lamb								PRESENT				Cliona californiana					iNaturalist:424811								Cliona californiana							Animalia	Porifera	Demospongiae	Clionaida	Clionaidae	Cliona	californiana		species		de Laubenfels, 1932
	imerss.org:PMLS:11705			Count: some		Andy Lamb								PRESENT				Clathria (Microciona) pennata					iNaturalist:63672								Clathria (Microciona) pennata							Animalia	Porifera	Demospongiae	Poecilosclerida	Microcionidae	Clathria	pennata		species		(Lambe, 1895)
	imerss.org:PMLS:11706			Count: few		Andy Lamb								PRESENT				Myxilla (Myxilla) incrustans					iNaturalist:256019								Myxilla (Myxilla) incrustans							Animalia	Porifera	Demospongiae	Poecilosclerida	Myxillidae	Myxilla	incrustans		species		(Johnston, 1842)
	imerss.org:PMLS:11797			Count: many		Andy Lamb								PRESENT				Cliona californiana					iNaturalist:424811								Cliona californiana							Animalia	Porifera	Demospongiae	Clionaida	Clionaidae	Cliona	californiana		species		de Laubenfels, 1932
	imerss.org:PMLS:11798			Count: some		Andy Lamb								PRESENT				Clathria (Microciona) pennata					iNaturalist:63672								Clathria (Microciona) pennata							Animalia	Porifera	Demospongiae	Poecilosclerida	Microcionidae	Clathria	pennata		species		(Lambe, 1895)
	imerss.org:PMLS:11893			Count: very many		Andy Lamb								PRESENT				Cliona californiana					iNaturalist:424811								Cliona californiana							Animalia	Porifera	Demospongiae	Clionaida	Clionaidae	Cliona	californiana		species		de Laubenfels, 1932
	imerss.org:PMLS:11894			Count: few		Andy Lamb								PRESENT				Xestospongia hispida					iNaturalist:873856								Xestospongia hispida							Animalia	Porifera	Demospongiae	Haplosclerida	Petrosiidae	Xestospongia	hispida		species		(Ridley & Dendy, 1886)
	imerss.org:PMLS:11895			Count: very many		Andy Lamb								PRESENT				Myxilla (Myxilla) lacunosa					iNaturalist:459826								Myxilla (Myxilla) lacunosa							Animalia	Porifera	Demospongiae	Poecilosclerida	Myxillidae	Myxilla	lacunosa		species		Lambe, 1893
	imerss.org:PMLS:11896			Count: some		Andy Lamb								PRESENT				Halichondria (Halichondria) bowerbanki					iNaturalist:120498								Halichondria (Halichondria) bowerbanki							Animalia	Porifera	Demospongiae	Suberitida	Halichondriidae	Halichondria	bowerbanki		species		Burton, 1930
	imerss.org:PMLS:11897					Andy Lamb		1						PRESENT				Aplysilla polyraphis					iNaturalist:213993								Aplysilla polyraphis							Animalia	Porifera	Demospongiae	Dendroceratida	Darwinellidae	Aplysilla	polyraphis		species		de Laubenfels, 1930
	imerss.org:PMLS:11898			Count: very many		Andy Lamb								PRESENT				Clathria (Microciona) pennata					iNaturalist:63672								Clathria (Microciona) pennata							Animalia	Porifera	Demospongiae	Poecilosclerida	Microcionidae	Clathria	pennata		species		(Lambe, 1895)
	imerss.org:PMLS:11899			Count: few		Andy Lamb								PRESENT				Myxilla (Myxilla) incrustans					iNaturalist:256019								Myxilla (Myxilla) incrustans							Animalia	Porifera	Demospongiae	Poecilosclerida	Myxillidae	Myxilla	incrustans		species		(Johnston, 1842)
	imerss.org:PMLS:12003			Count: many		Andy Lamb								PRESENT				Cliona californiana					iNaturalist:424811								Cliona californiana							Animalia	Porifera	Demospongiae	Clionaida	Clionaidae	Cliona	californiana		species		de Laubenfels, 1932
	imerss.org:PMLS:12004			Count: some		Andy Lamb								PRESENT				Halichondria (Halichondria) bowerbanki					iNaturalist:120498								Halichondria (Halichondria) bowerbanki							Animalia	Porifera	Demospongiae	Suberitida	Halichondriidae	Halichondria	bowerbanki		species		Burton, 1930
	imerss.org:PMLS:12005			Count: some		Andy Lamb								PRESENT				Clathria (Microciona) pennata					iNaturalist:63672								Clathria (Microciona) pennata							Animalia	Porifera	Demospongiae	Poecilosclerida	Microcionidae	Clathria	pennata		species		(Lambe, 1895)
	imerss.org:PMLS:12090			Count: some		Andy Lamb								PRESENT				Cliona californiana					iNaturalist:424811								Cliona californiana							Animalia	Porifera	Demospongiae	Clionaida	Clionaidae	Cliona	californiana		species		de Laubenfels, 1932
	imerss.org:PMLS:12091			Count: some		Andy Lamb								PRESENT				Hamigera sp.					iNaturalist:342247								Hamigera							Animalia	Porifera	Demospongiae	Poecilosclerida	Hymedesmiidae	Hamigera			genus
	imerss.org:PMLS:12092			Count: some		Andy Lamb								PRESENT				Clathria (Microciona) pennata					iNaturalist:63672								Clathria (Microciona) pennata							Animalia	Porifera	Demospongiae	Poecilosclerida	Microcionidae	Clathria	pennata		species		(Lambe, 1895)
	imerss.org:PMLS:12093			Count: few		Andy Lamb								PRESENT				Mycale (Aegogropila) adhaerens					iNaturalist:256010								Mycale (Aegogropila) adhaerens							Animalia	Porifera	Demospongiae	Poecilosclerida	Mycalidae	Mycale	adhaerens		species		(Lambe, 1893)
	imerss.org:PMLS:12188			Count: some		Andy Lamb								PRESENT				Cliona californiana					iNaturalist:424811								Cliona californiana							Animalia	Porifera	Demospongiae	Clionaida	Clionaidae	Cliona	californiana		species		de Laubenfels, 1932
	imerss.org:PMLS:12189			Count: few		Andy Lamb								PRESENT				Myxilla (Myxilla) lacunosa					iNaturalist:459826								Myxilla (Myxilla) lacunosa							Animalia	Porifera	Demospongiae	Poecilosclerida	Myxillidae	Myxilla	lacunosa		species		Lambe, 1893
	imerss.org:PMLS:12190			Count: some		Andy Lamb								PRESENT				Hamigera sp.					iNaturalist:342247								Hamigera							Animalia	Porifera	Demospongiae	Poecilosclerida	Hymedesmiidae	Hamigera			genus
	imerss.org:PMLS:12191			Count: some		Andy Lamb								PRESENT				Clathria (Microciona) pennata					iNaturalist:63672								Clathria (Microciona) pennata							Animalia	Porifera	Demospongiae	Poecilosclerida	Microcionidae	Clathria	pennata		species		(Lambe, 1895)
	imerss.org:PMLS:12192			Count: some		Andy Lamb								PRESENT				Mycale (Aegogropila) adhaerens					iNaturalist:256010								Mycale (Aegogropila) adhaerens							Animalia	Porifera	Demospongiae	Poecilosclerida	Mycalidae	Mycale	adhaerens		species		(Lambe, 1893)
	imerss.org:PMLS:12193					Andy Lamb		1						PRESENT				Halichondria (Eumastia) sitiens					iNaturalist:459775								Halichondria (Eumastia) sitiens							Animalia	Porifera	Demospongiae	Suberitida	Halichondriidae	Halichondria	sitiens		species		(Schmidt, 1870)
	imerss.org:PMLS:12282			Count: some		Andy Lamb								PRESENT				Cliona californiana					iNaturalist:424811								Cliona californiana							Animalia	Porifera	Demospongiae	Clionaida	Clionaidae	Cliona	californiana		species		de Laubenfels, 1932
	imerss.org:PMLS:12283			Count: some		Andy Lamb								PRESENT				Clathria (Microciona) pennata					iNaturalist:63672								Clathria (Microciona) pennata							Animalia	Porifera	Demospongiae	Poecilosclerida	Microcionidae	Clathria	pennata		species		(Lambe, 1895)
	imerss.org:PMLS:12284			Count: few		Andy Lamb								PRESENT				Myxilla (Myxilla) incrustans					iNaturalist:256019								Myxilla (Myxilla) incrustans							Animalia	Porifera	Demospongiae	Poecilosclerida	Myxillidae	Myxilla	incrustans		species		(Johnston, 1842)
	imerss.org:PMLS:12360			Count: few		Andy Lamb								PRESENT				Leucilla nuttingi					iNaturalist:117713								Leucilla nuttingi							Animalia	Porifera	Calcarea	Leucosolenida	Amphoriscidae	Leucilla	nuttingi		species		(Urban, 1902)
	imerss.org:PMLS:12361			Count: some		Andy Lamb								PRESENT				Cliona californiana					iNaturalist:424811								Cliona californiana							Animalia	Porifera	Demospongiae	Clionaida	Clionaidae	Cliona	californiana		species		de Laubenfels, 1932
	imerss.org:PMLS:12362			Count: some		Andy Lamb								PRESENT				Clathria (Microciona) pennata					iNaturalist:63672								Clathria (Microciona) pennata							Animalia	Porifera	Demospongiae	Poecilosclerida	Microcionidae	Clathria	pennata		species		(Lambe, 1895)
	imerss.org:PMLS:12435			Count: very many		Andy Lamb								PRESENT				Cliona californiana					iNaturalist:424811								Cliona californiana							Animalia	Porifera	Demospongiae	Clionaida	Clionaidae	Cliona	californiana		species		de Laubenfels, 1932
	imerss.org:PMLS:12436			Count: few		Andy Lamb								PRESENT				Myxilla (Myxilla) lacunosa					iNaturalist:459826								Myxilla (Myxilla) lacunosa							Animalia	Porifera	Demospongiae	Poecilosclerida	Myxillidae	Myxilla	lacunosa		species		Lambe, 1893
	imerss.org:PMLS:12437			Count: some		Andy Lamb								PRESENT				Clathria (Microciona) pennata					iNaturalist:63672								Clathria (Microciona) pennata							Animalia	Porifera	Demospongiae	Poecilosclerida	Microcionidae	Clathria	pennata		species		(Lambe, 1895)
	imerss.org:PMLS:12438			Count: few		Andy Lamb								PRESENT				Myxilla (Myxilla) incrustans					iNaturalist:256019								Myxilla (Myxilla) incrustans							Animalia	Porifera	Demospongiae	Poecilosclerida	Myxillidae	Myxilla	incrustans		species		(Johnston, 1842)
	imerss.org:PMLS:12517			Count: very many		Andy Lamb								PRESENT				Cliona californiana					iNaturalist:424811								Cliona californiana							Animalia	Porifera	Demospongiae	Clionaida	Clionaidae	Cliona	californiana		species		de Laubenfels, 1932
	imerss.org:PMLS:12518			Count: some		Andy Lamb								PRESENT				Clathria (Microciona) pennata					iNaturalist:63672								Clathria (Microciona) pennata							Animalia	Porifera	Demospongiae	Poecilosclerida	Microcionidae	Clathria	pennata		species		(Lambe, 1895)
	imerss.org:PMLS:12621			Count: some		Andy Lamb								PRESENT				Cliona californiana					iNaturalist:424811								Cliona californiana							Animalia	Porifera	Demospongiae	Clionaida	Clionaidae	Cliona	californiana		species		de Laubenfels, 1932
	imerss.org:PMLS:12622			Count: some		Andy Lamb								PRESENT				Clathria (Microciona) pennata					iNaturalist:63672								Clathria (Microciona) pennata							Animalia	Porifera	Demospongiae	Poecilosclerida	Microcionidae	Clathria	pennata		species		(Lambe, 1895)
	imerss.org:PMLS:12699			Count: many		Andy Lamb								PRESENT				Cliona californiana					iNaturalist:424811								Cliona californiana							Animalia	Porifera	Demospongiae	Clionaida	Clionaidae	Cliona	californiana		species		de Laubenfels, 1932
	imerss.org:PMLS:12700			Count: many		Andy Lamb								PRESENT				Clathria (Microciona) pennata					iNaturalist:63672								Clathria (Microciona) pennata							Animalia	Porifera	Demospongiae	Poecilosclerida	Microcionidae	Clathria	pennata		species		(Lambe, 1895)
	imerss.org:PMLS:12701			Count: few		Andy Lamb								PRESENT				Myxilla (Myxilla) incrustans					iNaturalist:256019								Myxilla (Myxilla) incrustans							Animalia	Porifera	Demospongiae	Poecilosclerida	Myxillidae	Myxilla	incrustans		species		(Johnston, 1842)
	imerss.org:PMLS:12813			Count: very many		Andy Lamb								PRESENT				Cliona californiana					iNaturalist:424811								Cliona californiana							Animalia	Porifera	Demospongiae	Clionaida	Clionaidae	Cliona	californiana		species		de Laubenfels, 1932
	imerss.org:PMLS:12814			Count: some		Andy Lamb								PRESENT				Xestospongia hispida					iNaturalist:873856								Xestospongia hispida							Animalia	Porifera	Demospongiae	Haplosclerida	Petrosiidae	Xestospongia	hispida		species		(Ridley & Dendy, 1886)
	imerss.org:PMLS:12815			Count: very many		Andy Lamb								PRESENT				Myxilla (Myxilla) lacunosa					iNaturalist:459826								Myxilla (Myxilla) lacunosa							Animalia	Porifera	Demospongiae	Poecilosclerida	Myxillidae	Myxilla	lacunosa		species		Lambe, 1893
	imerss.org:PMLS:12816			Count: some		Andy Lamb								PRESENT				Halichondria (Halichondria) bowerbanki					iNaturalist:120498								Halichondria (Halichondria) bowerbanki							Animalia	Porifera	Demospongiae	Suberitida	Halichondriidae	Halichondria	bowerbanki		species		Burton, 1930
	imerss.org:PMLS:12817			Count: many		Andy Lamb								PRESENT				Clathria (Microciona) pennata					iNaturalist:63672								Clathria (Microciona) pennata							Animalia	Porifera	Demospongiae	Poecilosclerida	Microcionidae	Clathria	pennata		species		(Lambe, 1895)
	imerss.org:PMLS:12818			Count: some		Andy Lamb								PRESENT				Myxilla (Myxilla) incrustans					iNaturalist:256019								Myxilla (Myxilla) incrustans							Animalia	Porifera	Demospongiae	Poecilosclerida	Myxillidae	Myxilla	incrustans		species		(Johnston, 1842)
	imerss.org:PMLS:12819			Count: few		Andy Lamb								PRESENT				Mycale (Aegogropila) adhaerens					iNaturalist:256010								Mycale (Aegogropila) adhaerens							Animalia	Porifera	Demospongiae	Poecilosclerida	Mycalidae	Mycale	adhaerens		species		(Lambe, 1893)
	imerss.org:PMLS:12942			Count: few		Andy Lamb								PRESENT				Leucilla nuttingi					iNaturalist:117713								Leucilla nuttingi							Animalia	Porifera	Calcarea	Leucosolenida	Amphoriscidae	Leucilla	nuttingi		species		(Urban, 1902)
	imerss.org:PMLS:12943			Count: many		Andy Lamb								PRESENT				Cliona californiana					iNaturalist:424811								Cliona californiana							Animalia	Porifera	Demospongiae	Clionaida	Clionaidae	Cliona	californiana		species		de Laubenfels, 1932
	imerss.org:PMLS:12944			Count: many		Andy Lamb								PRESENT				Clathria (Microciona) pennata					iNaturalist:63672								Clathria (Microciona) pennata							Animalia	Porifera	Demospongiae	Poecilosclerida	Microcionidae	Clathria	pennata		species		(Lambe, 1895)
	imerss.org:PMLS:12945			Count: some		Andy Lamb								PRESENT				Myxilla (Myxilla) incrustans					iNaturalist:256019								Myxilla (Myxilla) incrustans							Animalia	Porifera	Demospongiae	Poecilosclerida	Myxillidae	Myxilla	incrustans		species		(Johnston, 1842)
	imerss.org:PMLS:13043			Count: very many		Andy Lamb								PRESENT				Cliona californiana					iNaturalist:424811								Cliona californiana							Animalia	Porifera	Demospongiae	Clionaida	Clionaidae	Cliona	californiana		species		de Laubenfels, 1932
	imerss.org:PMLS:13044			Count: some		Andy Lamb								PRESENT				Clathria (Microciona) pennata					iNaturalist:63672								Clathria (Microciona) pennata							Animalia	Porifera	Demospongiae	Poecilosclerida	Microcionidae	Clathria	pennata		species		(Lambe, 1895)
	imerss.org:PMLS:13139			Count: many		Andy Lamb								PRESENT				Sycon spp.					iNaturalist:347738								Sycon							Animalia	Porifera	Calcarea	Leucosolenida	Sycettidae	Sycon			genus
	imerss.org:PMLS:13140			Count: very many		Andy Lamb								PRESENT				Leucosolenia nautilia					iNaturalist:347319								Leucosolenia nautilia							Animalia	Porifera	Calcarea	Leucosolenida	Leucosoleniidae	Leucosolenia	nautilia		species		de Laubenfels, 1930
	imerss.org:PMLS:13141					Andy Lamb		1						PRESENT				Craniella villosa					iNaturalist:459732								Craniella villosa							Animalia	Porifera	Demospongiae	Tetractinellida	Tetillidae	Craniella	villosa		species		Lambe, 1893
	imerss.org:PMLS:13142			Count: very many		Andy Lamb								PRESENT				Cliona californiana					iNaturalist:424811								Cliona californiana							Animalia	Porifera	Demospongiae	Clionaida	Clionaidae	Cliona	californiana		species		de Laubenfels, 1932
	imerss.org:PMLS:13143			Count: many		Andy Lamb								PRESENT				Clathria (Microciona) pennata					iNaturalist:63672								Clathria (Microciona) pennata							Animalia	Porifera	Demospongiae	Poecilosclerida	Microcionidae	Clathria	pennata		species		(Lambe, 1895)
	imerss.org:PMLS:13144			Count: some		Andy Lamb								PRESENT				Myxilla (Myxilla) incrustans					iNaturalist:256019								Myxilla (Myxilla) incrustans							Animalia	Porifera	Demospongiae	Poecilosclerida	Myxillidae	Myxilla	incrustans		species		(Johnston, 1842)
	imerss.org:PMLS:13145			Count: some		Andy Lamb								PRESENT				Mycale (Aegogropila) adhaerens					iNaturalist:256010								Mycale (Aegogropila) adhaerens							Animalia	Porifera	Demospongiae	Poecilosclerida	Mycalidae	Mycale	adhaerens		species		(Lambe, 1893)
	imerss.org:PMLS:13269			Count: some		Andy Lamb								PRESENT				Leucosolenia nautilia					iNaturalist:347319								Leucosolenia nautilia							Animalia	Porifera	Calcarea	Leucosolenida	Leucosoleniidae	Leucosolenia	nautilia		species		de Laubenfels, 1930
	imerss.org:PMLS:13270			Count: some		Andy Lamb								PRESENT				Cliona californiana					iNaturalist:424811								Cliona californiana							Animalia	Porifera	Demospongiae	Clionaida	Clionaidae	Cliona	californiana		species		de Laubenfels, 1932
	imerss.org:PMLS:13271			Count: abundant		Andy Lamb								PRESENT				Myxilla (Myxilla) lacunosa					iNaturalist:459826								Myxilla (Myxilla) lacunosa							Animalia	Porifera	Demospongiae	Poecilosclerida	Myxillidae	Myxilla	lacunosa		species		Lambe, 1893
	imerss.org:PMLS:13272			Count: few		Andy Lamb								PRESENT				Hamigera sp.					iNaturalist:342247								Hamigera							Animalia	Porifera	Demospongiae	Poecilosclerida	Hymedesmiidae	Hamigera			genus
	imerss.org:PMLS:13273			Count: some		Andy Lamb								PRESENT				Clathria (Microciona) pennata					iNaturalist:63672								Clathria (Microciona) pennata							Animalia	Porifera	Demospongiae	Poecilosclerida	Microcionidae	Clathria	pennata		species		(Lambe, 1895)
	imerss.org:PMLS:13274			Count: few		Andy Lamb								PRESENT				Myxilla (Myxilla) incrustans					iNaturalist:256019								Myxilla (Myxilla) incrustans							Animalia	Porifera	Demospongiae	Poecilosclerida	Myxillidae	Myxilla	incrustans		species		(Johnston, 1842)
	imerss.org:PMLS:13275			Count: few		Andy Lamb								PRESENT				Mycale (Aegogropila) adhaerens					iNaturalist:256010								Mycale (Aegogropila) adhaerens							Animalia	Porifera	Demospongiae	Poecilosclerida	Mycalidae	Mycale	adhaerens		species		(Lambe, 1893)
	imerss.org:PMLS:13389			Count: some		Andy Lamb								PRESENT				Sycon spp.					iNaturalist:347738								Sycon							Animalia	Porifera	Calcarea	Leucosolenida	Sycettidae	Sycon			genus
	imerss.org:PMLS:13390			Count: some		Andy Lamb								PRESENT				Cliona californiana					iNaturalist:424811								Cliona californiana							Animalia	Porifera	Demospongiae	Clionaida	Clionaidae	Cliona	californiana		species		de Laubenfels, 1932
	imerss.org:PMLS:13472					Andy Lamb		1						PRESENT				Polymastia pachymastia					iNaturalist:117717								Polymastia pachymastia							Animalia	Porifera	Demospongiae	Polymastiida	Polymastiidae	Polymastia	pachymastia		species		de Laubenfels, 1932
	imerss.org:PMLS:13473			Count: some		Andy Lamb								PRESENT				Cliona californiana					iNaturalist:424811								Cliona californiana							Animalia	Porifera	Demospongiae	Clionaida	Clionaidae	Cliona	californiana		species		de Laubenfels, 1932
	imerss.org:PMLS:13474			Count: few		Andy Lamb								PRESENT				Homaxinella amphispicula					iNaturalist:459847								Homaxinella amphispicula							Animalia	Porifera	Demospongiae	Suberitida	Suberitidae	Homaxinella	amphispicula		species		(de Laubenfels, 1961)
	imerss.org:PMLS:13475			Count: some		Andy Lamb								PRESENT				Clathria (Microciona) pennata					iNaturalist:63672								Clathria (Microciona) pennata							Animalia	Porifera	Demospongiae	Poecilosclerida	Microcionidae	Clathria	pennata		species		(Lambe, 1895)
	imerss.org:PMLS:13553			Count: few		Andy Lamb								PRESENT				Craniella villosa					iNaturalist:459732								Craniella villosa							Animalia	Porifera	Demospongiae	Tetractinellida	Tetillidae	Craniella	villosa		species		Lambe, 1893
	imerss.org:PMLS:13554			Count: some		Andy Lamb								PRESENT				Cliona californiana					iNaturalist:424811								Cliona californiana							Animalia	Porifera	Demospongiae	Clionaida	Clionaidae	Cliona	californiana		species		de Laubenfels, 1932
	imerss.org:PMLS:13555			Count: some		Andy Lamb								PRESENT				Clathria (Microciona) pennata					iNaturalist:63672								Clathria (Microciona) pennata							Animalia	Porifera	Demospongiae	Poecilosclerida	Microcionidae	Clathria	pennata		species		(Lambe, 1895)
	imerss.org:PMLS:13646			Count: few		Andy Lamb								PRESENT				Craniella villosa					iNaturalist:459732								Craniella villosa							Animalia	Porifera	Demospongiae	Tetractinellida	Tetillidae	Craniella	villosa		species		Lambe, 1893
	imerss.org:PMLS:13647			Count: many		Andy Lamb								PRESENT				Cliona californiana					iNaturalist:424811								Cliona californiana							Animalia	Porifera	Demospongiae	Clionaida	Clionaidae	Cliona	californiana		species		de Laubenfels, 1932
	imerss.org:PMLS:13648			Count: some		Andy Lamb								PRESENT				Myxilla (Myxilla) lacunosa					iNaturalist:459826								Myxilla (Myxilla) lacunosa							Animalia	Porifera	Demospongiae	Poecilosclerida	Myxillidae	Myxilla	lacunosa		species		Lambe, 1893
	imerss.org:PMLS:13649			Count: many		Andy Lamb								PRESENT				Clathria (Microciona) pennata					iNaturalist:63672								Clathria (Microciona) pennata							Animalia	Porifera	Demospongiae	Poecilosclerida	Microcionidae	Clathria	pennata		species		(Lambe, 1895)
	imerss.org:PMLS:13650			Count: few		Andy Lamb								PRESENT				Myxilla (Myxilla) incrustans					iNaturalist:256019								Myxilla (Myxilla) incrustans							Animalia	Porifera	Demospongiae	Poecilosclerida	Myxillidae	Myxilla	incrustans		species		(Johnston, 1842)
	imerss.org:PMLS:13775			Count: some		Andy Lamb								PRESENT				Cliona californiana					iNaturalist:424811								Cliona californiana							Animalia	Porifera	Demospongiae	Clionaida	Clionaidae	Cliona	californiana		species		de Laubenfels, 1932
	imerss.org:PMLS:13776			Count: few		Andy Lamb								PRESENT				Myxilla (Myxilla) lacunosa					iNaturalist:459826								Myxilla (Myxilla) lacunosa							Animalia	Porifera	Demospongiae	Poecilosclerida	Myxillidae	Myxilla	lacunosa		species		Lambe, 1893
	imerss.org:PMLS:13777			Count: some		Andy Lamb								PRESENT				Clathria (Microciona) pennata					iNaturalist:63672								Clathria (Microciona) pennata							Animalia	Porifera	Demospongiae	Poecilosclerida	Microcionidae	Clathria	pennata		species		(Lambe, 1895)
	imerss.org:PMLS:13854			Count: some		Andy Lamb								PRESENT				Cliona californiana					iNaturalist:424811								Cliona californiana							Animalia	Porifera	Demospongiae	Clionaida	Clionaidae	Cliona	californiana		species		de Laubenfels, 1932
	imerss.org:PMLS:13855			Count: few		Andy Lamb								PRESENT				Semisuberites cribrosa					iNaturalist:194571								Semisuberites cribrosa							Animalia	Porifera	Demospongiae	Poecilosclerida	Esperiopsidae	Semisuberites	cribrosa		species		(Miklucho-Maclay, 1870)
	imerss.org:PMLS:13856			Count: few		Andy Lamb								PRESENT				Homaxinella amphispicula					iNaturalist:459847								Homaxinella amphispicula							Animalia	Porifera	Demospongiae	Suberitida	Suberitidae	Homaxinella	amphispicula		species		(de Laubenfels, 1961)
	imerss.org:PMLS:13857			Count: some		Andy Lamb								PRESENT				Clathria (Microciona) pennata					iNaturalist:63672								Clathria (Microciona) pennata							Animalia	Porifera	Demospongiae	Poecilosclerida	Microcionidae	Clathria	pennata		species		(Lambe, 1895)
	imerss.org:PMLS:13968			Count: very many		Andy Lamb								PRESENT				Cliona californiana					iNaturalist:424811								Cliona californiana							Animalia	Porifera	Demospongiae	Clionaida	Clionaidae	Cliona	californiana		species		de Laubenfels, 1932
	imerss.org:PMLS:13969			Count: few		Andy Lamb								PRESENT				Halichondria (Halichondria) bowerbanki					iNaturalist:120498								Halichondria (Halichondria) bowerbanki							Animalia	Porifera	Demospongiae	Suberitida	Halichondriidae	Halichondria	bowerbanki		species		Burton, 1930
	imerss.org:PMLS:13970			Count: many		Andy Lamb								PRESENT				Clathria (Microciona) pennata					iNaturalist:63672								Clathria (Microciona) pennata							Animalia	Porifera	Demospongiae	Poecilosclerida	Microcionidae	Clathria	pennata		species		(Lambe, 1895)
	imerss.org:PMLS:14032			Count: some		Andy Lamb								PRESENT				Craniella villosa					iNaturalist:459732								Craniella villosa							Animalia	Porifera	Demospongiae	Tetractinellida	Tetillidae	Craniella	villosa		species		Lambe, 1893
	imerss.org:PMLS:14033			Count: some		Andy Lamb								PRESENT				Cliona californiana					iNaturalist:424811								Cliona californiana							Animalia	Porifera	Demospongiae	Clionaida	Clionaidae	Cliona	californiana		species		de Laubenfels, 1932
	imerss.org:PMLS:14034			Count: few		Andy Lamb								PRESENT				Halichondria (Halichondria) bowerbanki					iNaturalist:120498								Halichondria (Halichondria) bowerbanki							Animalia	Porifera	Demospongiae	Suberitida	Halichondriidae	Halichondria	bowerbanki		species		Burton, 1930
	imerss.org:PMLS:14035			Count: some		Andy Lamb								PRESENT				Hamigera sp.					iNaturalist:342247								Hamigera							Animalia	Porifera	Demospongiae	Poecilosclerida	Hymedesmiidae	Hamigera			genus
	imerss.org:PMLS:14036			Count: some		Andy Lamb								PRESENT				Clathria (Microciona) pennata					iNaturalist:63672								Clathria (Microciona) pennata							Animalia	Porifera	Demospongiae	Poecilosclerida	Microcionidae	Clathria	pennata		species		(Lambe, 1895)
	imerss.org:PMLS:14108			Count: many		Andy Lamb								PRESENT				Cliona californiana					iNaturalist:424811								Cliona californiana							Animalia	Porifera	Demospongiae	Clionaida	Clionaidae	Cliona	californiana		species		de Laubenfels, 1932
	imerss.org:PMLS:14109			Count: few		Andy Lamb								PRESENT				Halichondria (Halichondria) bowerbanki					iNaturalist:120498								Halichondria (Halichondria) bowerbanki							Animalia	Porifera	Demospongiae	Suberitida	Halichondriidae	Halichondria	bowerbanki		species		Burton, 1930
	imerss.org:PMLS:14110			Count: some		Andy Lamb								PRESENT				Hamigera sp.					iNaturalist:342247								Hamigera							Animalia	Porifera	Demospongiae	Poecilosclerida	Hymedesmiidae	Hamigera			genus
	imerss.org:PMLS:14111			Count: some		Andy Lamb								PRESENT				Clathria (Microciona) pennata					iNaturalist:63672								Clathria (Microciona) pennata							Animalia	Porifera	Demospongiae	Poecilosclerida	Microcionidae	Clathria	pennata		species		(Lambe, 1895)
	imerss.org:PMLS:14169					Andy Lamb		2						PRESENT				Craniella villosa					iNaturalist:459732								Craniella villosa							Animalia	Porifera	Demospongiae	Tetractinellida	Tetillidae	Craniella	villosa		species		Lambe, 1893
	imerss.org:PMLS:14170			Count: some		Andy Lamb								PRESENT				Cliona californiana					iNaturalist:424811								Cliona californiana							Animalia	Porifera	Demospongiae	Clionaida	Clionaidae	Cliona	californiana		species		de Laubenfels, 1932
	imerss.org:PMLS:14171			Count: some		Andy Lamb								PRESENT				Halichondria (Halichondria) bowerbanki					iNaturalist:120498								Halichondria (Halichondria) bowerbanki							Animalia	Porifera	Demospongiae	Suberitida	Halichondriidae	Halichondria	bowerbanki		species		Burton, 1930
	imerss.org:PMLS:14172			Count: some		Andy Lamb								PRESENT				Acarnus erithacus					iNaturalist:63669								Acarnus erithacus							Animalia	Porifera	Demospongiae	Poecilosclerida	Acarnidae	Acarnus	erithacus		species		de Laubenfels, 1927
	imerss.org:PMLS:14173			Count: some		Andy Lamb								PRESENT				Clathria (Microciona) pennata					iNaturalist:63672								Clathria (Microciona) pennata							Animalia	Porifera	Demospongiae	Poecilosclerida	Microcionidae	Clathria	pennata		species		(Lambe, 1895)
	imerss.org:PMLS:14260			Count: some		Andy Lamb								PRESENT				Cliona californiana					iNaturalist:424811								Cliona californiana							Animalia	Porifera	Demospongiae	Clionaida	Clionaidae	Cliona	californiana		species		de Laubenfels, 1932
	imerss.org:PMLS:14261					Andy Lamb		2						PRESENT				Xestospongia hispida					iNaturalist:873856								Xestospongia hispida							Animalia	Porifera	Demospongiae	Haplosclerida	Petrosiidae	Xestospongia	hispida		species		(Ridley & Dendy, 1886)
	imerss.org:PMLS:14262			Count: some		Andy Lamb								PRESENT				Halichondria (Halichondria) bowerbanki					iNaturalist:120498								Halichondria (Halichondria) bowerbanki							Animalia	Porifera	Demospongiae	Suberitida	Halichondriidae	Halichondria	bowerbanki		species		Burton, 1930
	imerss.org:PMLS:14263			Count: very many		Andy Lamb								PRESENT				Hamigera sp.					iNaturalist:342247								Hamigera							Animalia	Porifera	Demospongiae	Poecilosclerida	Hymedesmiidae	Hamigera			genus
	imerss.org:PMLS:14264			Count: some		Andy Lamb								PRESENT				Clathria (Microciona) pennata					iNaturalist:63672								Clathria (Microciona) pennata							Animalia	Porifera	Demospongiae	Poecilosclerida	Microcionidae	Clathria	pennata		species		(Lambe, 1895)
	imerss.org:PMLS:14354			Count: few		Andy Lamb								PRESENT				Leucilla nuttingi					iNaturalist:117713								Leucilla nuttingi							Animalia	Porifera	Calcarea	Leucosolenida	Amphoriscidae	Leucilla	nuttingi		species		(Urban, 1902)
	imerss.org:PMLS:14355			Count: many		Andy Lamb								PRESENT				Cliona californiana					iNaturalist:424811								Cliona californiana							Animalia	Porifera	Demospongiae	Clionaida	Clionaidae	Cliona	californiana		species		de Laubenfels, 1932
	imerss.org:PMLS:14356					Andy Lamb		1						PRESENT				Xestospongia hispida					iNaturalist:873856								Xestospongia hispida							Animalia	Porifera	Demospongiae	Haplosclerida	Petrosiidae	Xestospongia	hispida		species		(Ridley & Dendy, 1886)
	imerss.org:PMLS:14357			Count: some		Andy Lamb								PRESENT				Myxilla (Myxilla) lacunosa					iNaturalist:459826								Myxilla (Myxilla) lacunosa							Animalia	Porifera	Demospongiae	Poecilosclerida	Myxillidae	Myxilla	lacunosa		species		Lambe, 1893
	imerss.org:PMLS:14358			Count: some		Andy Lamb								PRESENT				Clathria (Microciona) pennata					iNaturalist:63672								Clathria (Microciona) pennata							Animalia	Porifera	Demospongiae	Poecilosclerida	Microcionidae	Clathria	pennata		species		(Lambe, 1895)
	imerss.org:PMLS:14458			Count: some		Andy Lamb								PRESENT				Cliona californiana					iNaturalist:424811								Cliona californiana							Animalia	Porifera	Demospongiae	Clionaida	Clionaidae	Cliona	californiana		species		de Laubenfels, 1932
	imerss.org:PMLS:14459			Count: some		Andy Lamb								PRESENT				Clathria (Microciona) pennata					iNaturalist:63672								Clathria (Microciona) pennata							Animalia	Porifera	Demospongiae	Poecilosclerida	Microcionidae	Clathria	pennata		species		(Lambe, 1895)
	imerss.org:PMLS:14460			Count: few		Andy Lamb								PRESENT				Myxilla (Myxilla) incrustans					iNaturalist:256019								Myxilla (Myxilla) incrustans							Animalia	Porifera	Demospongiae	Poecilosclerida	Myxillidae	Myxilla	incrustans		species		(Johnston, 1842)
	imerss.org:PMLS:14536			Count: some		Andy Lamb								PRESENT				Cliona californiana					iNaturalist:424811								Cliona californiana							Animalia	Porifera	Demospongiae	Clionaida	Clionaidae	Cliona	californiana		species		de Laubenfels, 1932
	imerss.org:PMLS:14537			Count: few		Andy Lamb								PRESENT				Halichondria (Halichondria) bowerbanki					iNaturalist:120498								Halichondria (Halichondria) bowerbanki							Animalia	Porifera	Demospongiae	Suberitida	Halichondriidae	Halichondria	bowerbanki		species		Burton, 1930
	imerss.org:PMLS:14538			Count: few		Andy Lamb								PRESENT				Clathria (Microciona) pennata					iNaturalist:63672								Clathria (Microciona) pennata							Animalia	Porifera	Demospongiae	Poecilosclerida	Microcionidae	Clathria	pennata		species		(Lambe, 1895)
	imerss.org:PMLS:14625			Count: few		Andy Lamb								PRESENT				Sycon spp.					iNaturalist:347738								Sycon							Animalia	Porifera	Calcarea	Leucosolenida	Sycettidae	Sycon			genus
	imerss.org:PMLS:14626			Count: some		Andy Lamb								PRESENT				Cliona californiana					iNaturalist:424811								Cliona californiana							Animalia	Porifera	Demospongiae	Clionaida	Clionaidae	Cliona	californiana		species		de Laubenfels, 1932
	imerss.org:PMLS:14627					Andy Lamb		1						PRESENT				Xestospongia hispida					iNaturalist:873856								Xestospongia hispida							Animalia	Porifera	Demospongiae	Haplosclerida	Petrosiidae	Xestospongia	hispida		species		(Ridley & Dendy, 1886)
	imerss.org:PMLS:14628			Count: some		Andy Lamb								PRESENT				Halichondria (Halichondria) bowerbanki					iNaturalist:120498								Halichondria (Halichondria) bowerbanki							Animalia	Porifera	Demospongiae	Suberitida	Halichondriidae	Halichondria	bowerbanki		species		Burton, 1930
	imerss.org:PMLS:14629			Count: some		Andy Lamb								PRESENT				Clathria (Microciona) pennata					iNaturalist:63672								Clathria (Microciona) pennata							Animalia	Porifera	Demospongiae	Poecilosclerida	Microcionidae	Clathria	pennata		species		(Lambe, 1895)
	imerss.org:PMLS:14630			Count: few		Andy Lamb								PRESENT				Myxilla (Myxilla) incrustans					iNaturalist:256019								Myxilla (Myxilla) incrustans							Animalia	Porifera	Demospongiae	Poecilosclerida	Myxillidae	Myxilla	incrustans		species		(Johnston, 1842)
	imerss.org:PMLS:14631			Count: few		Andy Lamb								PRESENT				Mycale (Aegogropila) adhaerens					iNaturalist:256010								Mycale (Aegogropila) adhaerens							Animalia	Porifera	Demospongiae	Poecilosclerida	Mycalidae	Mycale	adhaerens		species		(Lambe, 1893)
	imerss.org:PMLS:14730			Count: some		Andy Lamb								PRESENT				Cliona californiana					iNaturalist:424811								Cliona californiana							Animalia	Porifera	Demospongiae	Clionaida	Clionaidae	Cliona	californiana		species		de Laubenfels, 1932
	imerss.org:PMLS:14731			Count: some		Andy Lamb								PRESENT				Clathria (Microciona) pennata					iNaturalist:63672								Clathria (Microciona) pennata							Animalia	Porifera	Demospongiae	Poecilosclerida	Microcionidae	Clathria	pennata		species		(Lambe, 1895)
	imerss.org:PMLS:14825					Andy Lamb		1						PRESENT				Leucilla nuttingi					iNaturalist:117713								Leucilla nuttingi							Animalia	Porifera	Calcarea	Leucosolenida	Amphoriscidae	Leucilla	nuttingi		species		(Urban, 1902)
	imerss.org:PMLS:14826			Count: some		Andy Lamb								PRESENT				Cliona californiana					iNaturalist:424811								Cliona californiana							Animalia	Porifera	Demospongiae	Clionaida	Clionaidae	Cliona	californiana		species		de Laubenfels, 1932
	imerss.org:PMLS:14827			Count: few		Andy Lamb								PRESENT				Myxilla (Myxilla) lacunosa					iNaturalist:459826								Myxilla (Myxilla) lacunosa							Animalia	Porifera	Demospongiae	Poecilosclerida	Myxillidae	Myxilla	lacunosa		species		Lambe, 1893
	imerss.org:PMLS:14828			Count: some		Andy Lamb								PRESENT				Haliclona (Haliclona) sp.2					iNaturalist:1227087								Haliclona (Haliclona) sp.2							Animalia	Porifera	Demospongiae	Haplosclerida	Chalinidae	Haliclona	sp.2		species
	imerss.org:PMLS:14829					Andy Lamb		1						PRESENT				Aplysilla sp. nov.					iNaturalist:63646								Aplysilla							Animalia	Porifera	Demospongiae	Dendroceratida	Darwinellidae	Aplysilla			genus
	imerss.org:PMLS:14830			Count: some		Andy Lamb								PRESENT				Clathria (Microciona) pennata					iNaturalist:63672								Clathria (Microciona) pennata							Animalia	Porifera	Demospongiae	Poecilosclerida	Microcionidae	Clathria	pennata		species		(Lambe, 1895)
	imerss.org:PMLS:14943			Count: few		Andy Lamb								PRESENT				Leucilla nuttingi					iNaturalist:117713								Leucilla nuttingi							Animalia	Porifera	Calcarea	Leucosolenida	Amphoriscidae	Leucilla	nuttingi		species		(Urban, 1902)
	imerss.org:PMLS:14944			Count: many		Andy Lamb								PRESENT				Cliona californiana					iNaturalist:424811								Cliona californiana							Animalia	Porifera	Demospongiae	Clionaida	Clionaidae	Cliona	californiana		species		de Laubenfels, 1932
	imerss.org:PMLS:14945					Andy Lamb		1						PRESENT				Halichondria (Halichondria) bowerbanki					iNaturalist:120498								Halichondria (Halichondria) bowerbanki							Animalia	Porifera	Demospongiae	Suberitida	Halichondriidae	Halichondria	bowerbanki		species		Burton, 1930
	imerss.org:PMLS:14946			Count: few		Andy Lamb								PRESENT				Clathria (Microciona) pennata					iNaturalist:63672								Clathria (Microciona) pennata							Animalia	Porifera	Demospongiae	Poecilosclerida	Microcionidae	Clathria	pennata		species		(Lambe, 1895)
	imerss.org:PMLS:15042			Count: some		Andy Lamb								PRESENT				Cliona californiana					iNaturalist:424811								Cliona californiana							Animalia	Porifera	Demospongiae	Clionaida	Clionaidae	Cliona	californiana		species		de Laubenfels, 1932
	imerss.org:PMLS:15043			Count: some		Andy Lamb								PRESENT				Clathria (Microciona) pennata					iNaturalist:63672								Clathria (Microciona) pennata							Animalia	Porifera	Demospongiae	Poecilosclerida	Microcionidae	Clathria	pennata		species		(Lambe, 1895)
	imerss.org:PMLS:15044			Count: few		Andy Lamb								PRESENT				Mycale (Aegogropila) adhaerens					iNaturalist:256010								Mycale (Aegogropila) adhaerens							Animalia	Porifera	Demospongiae	Poecilosclerida	Mycalidae	Mycale	adhaerens		species		(Lambe, 1893)
	imerss.org:PMLS:15142			Count: abundant		Andy Lamb								PRESENT				Cliona californiana					iNaturalist:424811								Cliona californiana							Animalia	Porifera	Demospongiae	Clionaida	Clionaidae	Cliona	californiana		species		de Laubenfels, 1932
	imerss.org:PMLS:15143			Count: few		Andy Lamb								PRESENT				Suberites concinnus					iNaturalist:873889								Suberites concinnus							Animalia	Porifera	Demospongiae	Suberitida	Suberitidae	Suberites	concinnus		species		Lambe, 1895
	imerss.org:PMLS:15144			Count: some		Andy Lamb								PRESENT				Xestospongia hispida					iNaturalist:873856								Xestospongia hispida							Animalia	Porifera	Demospongiae	Haplosclerida	Petrosiidae	Xestospongia	hispida		species		(Ridley & Dendy, 1886)
	imerss.org:PMLS:15145			Count: abundant		Andy Lamb								PRESENT				Myxilla (Myxilla) lacunosa					iNaturalist:459826								Myxilla (Myxilla) lacunosa							Animalia	Porifera	Demospongiae	Poecilosclerida	Myxillidae	Myxilla	lacunosa		species		Lambe, 1893
	imerss.org:PMLS:15146			Count: some		Andy Lamb								PRESENT				Halichondria (Halichondria) bowerbanki					iNaturalist:120498								Halichondria (Halichondria) bowerbanki							Animalia	Porifera	Demospongiae	Suberitida	Halichondriidae	Halichondria	bowerbanki		species		Burton, 1930
	imerss.org:PMLS:15147			Count: some		Andy Lamb								PRESENT				Haliclona (Haliclona) sp.2					iNaturalist:1227087								Haliclona (Haliclona) sp.2							Animalia	Porifera	Demospongiae	Haplosclerida	Chalinidae	Haliclona	sp.2		species
	imerss.org:PMLS:15148			Count: few		Andy Lamb								PRESENT				Antho (Plocamia) karykina					iNaturalist:345142								Antho (Plocamia) karykina							Animalia	Porifera	Demospongiae	Poecilosclerida	Microcionidae	Antho	karykina		species		(de Laubenfels, 1927)
	imerss.org:PMLS:15149			Count: many		Andy Lamb								PRESENT				Clathria (Microciona) pennata					iNaturalist:63672								Clathria (Microciona) pennata							Animalia	Porifera	Demospongiae	Poecilosclerida	Microcionidae	Clathria	pennata		species		(Lambe, 1895)
	imerss.org:PMLS:15150			Count: few		Andy Lamb								PRESENT				Myxilla (Myxilla) incrustans					iNaturalist:256019								Myxilla (Myxilla) incrustans							Animalia	Porifera	Demospongiae	Poecilosclerida	Myxillidae	Myxilla	incrustans		species		(Johnston, 1842)
	imerss.org:PMLS:15151			Count: few		Andy Lamb								PRESENT				Mycale (Aegogropila) adhaerens					iNaturalist:256010								Mycale (Aegogropila) adhaerens							Animalia	Porifera	Demospongiae	Poecilosclerida	Mycalidae	Mycale	adhaerens		species		(Lambe, 1893)
	imerss.org:PMLS:15245			Count: many		Andy Lamb								PRESENT				Cliona californiana					iNaturalist:424811								Cliona californiana							Animalia	Porifera	Demospongiae	Clionaida	Clionaidae	Cliona	californiana		species		de Laubenfels, 1932
	imerss.org:PMLS:15246			Count: some		Andy Lamb								PRESENT				Clathria (Microciona) pennata					iNaturalist:63672								Clathria (Microciona) pennata							Animalia	Porifera	Demospongiae	Poecilosclerida	Microcionidae	Clathria	pennata		species		(Lambe, 1895)
	imerss.org:PMLS:15247			Count: few		Andy Lamb								PRESENT				Myxilla (Myxilla) incrustans					iNaturalist:256019								Myxilla (Myxilla) incrustans							Animalia	Porifera	Demospongiae	Poecilosclerida	Myxillidae	Myxilla	incrustans		species		(Johnston, 1842)
	imerss.org:PMLS:15248			Count: few		Andy Lamb								PRESENT				Mycale (Aegogropila) adhaerens					iNaturalist:256010								Mycale (Aegogropila) adhaerens							Animalia	Porifera	Demospongiae	Poecilosclerida	Mycalidae	Mycale	adhaerens		species		(Lambe, 1893)
	imerss.org:PMLS:15343			Count: many		Andy Lamb								PRESENT				Cliona californiana					iNaturalist:424811								Cliona californiana							Animalia	Porifera	Demospongiae	Clionaida	Clionaidae	Cliona	californiana		species		de Laubenfels, 1932
	imerss.org:PMLS:15344			Count: some		Andy Lamb								PRESENT				Clathria (Microciona) pennata					iNaturalist:63672								Clathria (Microciona) pennata							Animalia	Porifera	Demospongiae	Poecilosclerida	Microcionidae	Clathria	pennata		species		(Lambe, 1895)
	imerss.org:PMLS:15345			Count: few		Andy Lamb								PRESENT				Mycale (Aegogropila) adhaerens					iNaturalist:256010								Mycale (Aegogropila) adhaerens							Animalia	Porifera	Demospongiae	Poecilosclerida	Mycalidae	Mycale	adhaerens		species		(Lambe, 1893)
	imerss.org:PMLS:15455			Count: some		Andy Lamb								PRESENT				Cliona californiana					iNaturalist:424811								Cliona californiana							Animalia	Porifera	Demospongiae	Clionaida	Clionaidae	Cliona	californiana		species		de Laubenfels, 1932
	imerss.org:PMLS:15456					Andy Lamb		1						PRESENT				Myxilla (Myxilla) lacunosa					iNaturalist:459826								Myxilla (Myxilla) lacunosa							Animalia	Porifera	Demospongiae	Poecilosclerida	Myxillidae	Myxilla	lacunosa		species		Lambe, 1893
	imerss.org:PMLS:15457					Andy Lamb		1						PRESENT				Haliclona (Haliclona) sp.2					iNaturalist:1227087								Haliclona (Haliclona) sp.2							Animalia	Porifera	Demospongiae	Haplosclerida	Chalinidae	Haliclona	sp.2		species
	imerss.org:PMLS:15458					Andy Lamb		2						PRESENT				Acarnus erithacus					iNaturalist:63669								Acarnus erithacus							Animalia	Porifera	Demospongiae	Poecilosclerida	Acarnidae	Acarnus	erithacus		species		de Laubenfels, 1927
	imerss.org:PMLS:15459			Count: very many		Andy Lamb								PRESENT				Clathria (Microciona) pennata					iNaturalist:63672								Clathria (Microciona) pennata							Animalia	Porifera	Demospongiae	Poecilosclerida	Microcionidae	Clathria	pennata		species		(Lambe, 1895)
	imerss.org:PMLS:15563			Count: some		Andy Lamb								PRESENT				Sycon spp.					iNaturalist:347738								Sycon							Animalia	Porifera	Calcarea	Leucosolenida	Sycettidae	Sycon			genus
	imerss.org:PMLS:15564					Andy Lamb		2						PRESENT				Leucosolenia eleanor					iNaturalist:424817								Leucosolenia eleanor							Animalia	Porifera	Calcarea	Leucosolenida	Leucosoleniidae	Leucosolenia	eleanor		species		Urban, 1906
	imerss.org:PMLS:15565			Count: some		Andy Lamb								PRESENT				Cliona californiana					iNaturalist:424811								Cliona californiana							Animalia	Porifera	Demospongiae	Clionaida	Clionaidae	Cliona	californiana		species		de Laubenfels, 1932
	imerss.org:PMLS:15566					Andy Lamb		1						PRESENT				Acarnus erithacus					iNaturalist:63669								Acarnus erithacus							Animalia	Porifera	Demospongiae	Poecilosclerida	Acarnidae	Acarnus	erithacus		species		de Laubenfels, 1927
	imerss.org:PMLS:15567			Count: many		Andy Lamb								PRESENT				Clathria (Microciona) pennata					iNaturalist:63672								Clathria (Microciona) pennata							Animalia	Porifera	Demospongiae	Poecilosclerida	Microcionidae	Clathria	pennata		species		(Lambe, 1895)
	imerss.org:PMLS:15568			Count: few		Andy Lamb								PRESENT				Myxilla (Myxilla) incrustans					iNaturalist:256019								Myxilla (Myxilla) incrustans							Animalia	Porifera	Demospongiae	Poecilosclerida	Myxillidae	Myxilla	incrustans		species		(Johnston, 1842)
	imerss.org:PMLS:15569			Count: few		Andy Lamb								PRESENT				Mycale (Aegogropila) adhaerens					iNaturalist:256010								Mycale (Aegogropila) adhaerens							Animalia	Porifera	Demospongiae	Poecilosclerida	Mycalidae	Mycale	adhaerens		species		(Lambe, 1893)
	imerss.org:PMLS:15690			Count: many		Andy Lamb								PRESENT				Cliona californiana					iNaturalist:424811								Cliona californiana							Animalia	Porifera	Demospongiae	Clionaida	Clionaidae	Cliona	californiana		species		de Laubenfels, 1932
	imerss.org:PMLS:15691			Count: many		Andy Lamb								PRESENT				Clathria (Microciona) pennata					iNaturalist:63672								Clathria (Microciona) pennata							Animalia	Porifera	Demospongiae	Poecilosclerida	Microcionidae	Clathria	pennata		species		(Lambe, 1895)
	imerss.org:PMLS:15788			Count: few		Andy Lamb								PRESENT				Sycon spp.					iNaturalist:347738								Sycon							Animalia	Porifera	Calcarea	Leucosolenida	Sycettidae	Sycon			genus
	imerss.org:PMLS:15789			Count: some		Andy Lamb								PRESENT				Leucosolenia eleanor					iNaturalist:424817								Leucosolenia eleanor							Animalia	Porifera	Calcarea	Leucosolenida	Leucosoleniidae	Leucosolenia	eleanor		species		Urban, 1906
	imerss.org:PMLS:15790			Count: some		Andy Lamb								PRESENT				Cliona californiana					iNaturalist:424811								Cliona californiana							Animalia	Porifera	Demospongiae	Clionaida	Clionaidae	Cliona	californiana		species		de Laubenfels, 1932
	imerss.org:PMLS:15791					Andy Lamb		2						PRESENT				Haliclona (Haliclona) sp.1					iNaturalist:1227076								Haliclona (Haliclona) sp.1							Animalia	Porifera	Demospongiae	Haplosclerida	Chalinidae	Haliclona	sp.1		species
	imerss.org:PMLS:15792			Count: many		Andy Lamb								PRESENT				Clathria (Microciona) pennata					iNaturalist:63672								Clathria (Microciona) pennata							Animalia	Porifera	Demospongiae	Poecilosclerida	Microcionidae	Clathria	pennata		species		(Lambe, 1895)
	imerss.org:PMLS:15905			Count: some		Andy Lamb								PRESENT				Sycon spp.					iNaturalist:347738								Sycon							Animalia	Porifera	Calcarea	Leucosolenida	Sycettidae	Sycon			genus
	imerss.org:PMLS:15906			Count: some		Andy Lamb								PRESENT				Cliona californiana					iNaturalist:424811								Cliona californiana							Animalia	Porifera	Demospongiae	Clionaida	Clionaidae	Cliona	californiana		species		de Laubenfels, 1932
	imerss.org:PMLS:15907			Count: some		Andy Lamb								PRESENT				Clathria (Microciona) pennata					iNaturalist:63672								Clathria (Microciona) pennata							Animalia	Porifera	Demospongiae	Poecilosclerida	Microcionidae	Clathria	pennata		species		(Lambe, 1895)
	imerss.org:PMLS:16035			Count: few		Andy Lamb								PRESENT				Myxilla (Myxilla) lacunosa					iNaturalist:459826								Myxilla (Myxilla) lacunosa							Animalia	Porifera	Demospongiae	Poecilosclerida	Myxillidae	Myxilla	lacunosa		species		Lambe, 1893
	imerss.org:PMLS:16036			Count: some		Andy Lamb								PRESENT				Clathria (Microciona) pennata					iNaturalist:63672								Clathria (Microciona) pennata							Animalia	Porifera	Demospongiae	Poecilosclerida	Microcionidae	Clathria	pennata		species		(Lambe, 1895)
	imerss.org:PMLS:16037			Count: few		Andy Lamb								PRESENT				Myxilla (Myxilla) incrustans					iNaturalist:256019								Myxilla (Myxilla) incrustans							Animalia	Porifera	Demospongiae	Poecilosclerida	Myxillidae	Myxilla	incrustans		species		(Johnston, 1842)
	imerss.org:PMLS:16137			Count: some		Andy Lamb								PRESENT				Cliona californiana					iNaturalist:424811								Cliona californiana							Animalia	Porifera	Demospongiae	Clionaida	Clionaidae	Cliona	californiana		species		de Laubenfels, 1932
	imerss.org:PMLS:16138			Count: some		Andy Lamb								PRESENT				Halichondria (Halichondria) bowerbanki					iNaturalist:120498								Halichondria (Halichondria) bowerbanki							Animalia	Porifera	Demospongiae	Suberitida	Halichondriidae	Halichondria	bowerbanki		species		Burton, 1930
	imerss.org:PMLS:16139			Count: some		Andy Lamb								PRESENT				Clathria (Microciona) pennata					iNaturalist:63672								Clathria (Microciona) pennata							Animalia	Porifera	Demospongiae	Poecilosclerida	Microcionidae	Clathria	pennata		species		(Lambe, 1895)
	imerss.org:PMLS:16214					Andy Lamb		1						PRESENT				Leucilla nuttingi					iNaturalist:117713								Leucilla nuttingi							Animalia	Porifera	Calcarea	Leucosolenida	Amphoriscidae	Leucilla	nuttingi		species		(Urban, 1902)
	imerss.org:PMLS:16215			Count: some		Andy Lamb								PRESENT				Cliona californiana					iNaturalist:424811								Cliona californiana							Animalia	Porifera	Demospongiae	Clionaida	Clionaidae	Cliona	californiana		species		de Laubenfels, 1932
	imerss.org:PMLS:16216			Count: very many		Andy Lamb								PRESENT				Halichondria (Halichondria) bowerbanki					iNaturalist:120498								Halichondria (Halichondria) bowerbanki							Animalia	Porifera	Demospongiae	Suberitida	Halichondriidae	Halichondria	bowerbanki		species		Burton, 1930
	imerss.org:PMLS:16217			Count: some		Andy Lamb								PRESENT				Clathria (Microciona) pennata					iNaturalist:63672								Clathria (Microciona) pennata							Animalia	Porifera	Demospongiae	Poecilosclerida	Microcionidae	Clathria	pennata		species		(Lambe, 1895)
	imerss.org:PMLS:16306			Count: some		Andy Lamb								PRESENT				Cliona californiana					iNaturalist:424811								Cliona californiana							Animalia	Porifera	Demospongiae	Clionaida	Clionaidae	Cliona	californiana		species		de Laubenfels, 1932
	imerss.org:PMLS:16307					Andy Lamb		1						PRESENT				Semisuberites cribrosa					iNaturalist:194571								Semisuberites cribrosa							Animalia	Porifera	Demospongiae	Poecilosclerida	Esperiopsidae	Semisuberites	cribrosa		species		(Miklucho-Maclay, 1870)
	imerss.org:PMLS:16308			Count: many		Andy Lamb								PRESENT				Halichondria (Halichondria) bowerbanki					iNaturalist:120498								Halichondria (Halichondria) bowerbanki							Animalia	Porifera	Demospongiae	Suberitida	Halichondriidae	Halichondria	bowerbanki		species		Burton, 1930
	imerss.org:PMLS:16309			Count: many		Andy Lamb								PRESENT				Clathria (Microciona) pennata					iNaturalist:63672								Clathria (Microciona) pennata							Animalia	Porifera	Demospongiae	Poecilosclerida	Microcionidae	Clathria	pennata		species		(Lambe, 1895)
	imerss.org:PMLS:16385			Count: some		Andy Lamb								PRESENT				Cliona californiana					iNaturalist:424811								Cliona californiana							Animalia	Porifera	Demospongiae	Clionaida	Clionaidae	Cliona	californiana		species		de Laubenfels, 1932
	imerss.org:PMLS:16386			Count: some		Andy Lamb								PRESENT				Halichondria (Halichondria) bowerbanki					iNaturalist:120498								Halichondria (Halichondria) bowerbanki							Animalia	Porifera	Demospongiae	Suberitida	Halichondriidae	Halichondria	bowerbanki		species		Burton, 1930
	imerss.org:PMLS:16387			Count: some		Andy Lamb								PRESENT				Clathria (Microciona) pennata					iNaturalist:63672								Clathria (Microciona) pennata							Animalia	Porifera	Demospongiae	Poecilosclerida	Microcionidae	Clathria	pennata		species		(Lambe, 1895)
	imerss.org:PMLS:16478			Count: some		Andy Lamb								PRESENT				Cliona californiana					iNaturalist:424811								Cliona californiana							Animalia	Porifera	Demospongiae	Clionaida	Clionaidae	Cliona	californiana		species		de Laubenfels, 1932
	imerss.org:PMLS:16479			Count: some		Andy Lamb								PRESENT				Clathria (Microciona) pennata					iNaturalist:63672								Clathria (Microciona) pennata							Animalia	Porifera	Demospongiae	Poecilosclerida	Microcionidae	Clathria	pennata		species		(Lambe, 1895)
	imerss.org:PMLS:16480			Count: few		Andy Lamb								PRESENT				Myxilla (Myxilla) incrustans					iNaturalist:256019								Myxilla (Myxilla) incrustans							Animalia	Porifera	Demospongiae	Poecilosclerida	Myxillidae	Myxilla	incrustans		species		(Johnston, 1842)
	imerss.org:PMLS:16481			Count: few		Andy Lamb								PRESENT				Mycale (Aegogropila) adhaerens					iNaturalist:256010								Mycale (Aegogropila) adhaerens							Animalia	Porifera	Demospongiae	Poecilosclerida	Mycalidae	Mycale	adhaerens		species		(Lambe, 1893)
	imerss.org:PMLS:16578					Andy Lamb		2						PRESENT				Craniella villosa					iNaturalist:459732								Craniella villosa							Animalia	Porifera	Demospongiae	Tetractinellida	Tetillidae	Craniella	villosa		species		Lambe, 1893
	imerss.org:PMLS:16579			Count: some		Andy Lamb								PRESENT				Cliona californiana					iNaturalist:424811								Cliona californiana							Animalia	Porifera	Demospongiae	Clionaida	Clionaidae	Cliona	californiana		species		de Laubenfels, 1932
	imerss.org:PMLS:16580			Count: few		Andy Lamb								PRESENT				Clathria (Microciona) pennata					iNaturalist:63672								Clathria (Microciona) pennata							Animalia	Porifera	Demospongiae	Poecilosclerida	Microcionidae	Clathria	pennata		species		(Lambe, 1895)
	imerss.org:PMLS:16662			Count: some		Andy Lamb								PRESENT				Cliona californiana					iNaturalist:424811								Cliona californiana							Animalia	Porifera	Demospongiae	Clionaida	Clionaidae	Cliona	californiana		species		de Laubenfels, 1932
	imerss.org:PMLS:16663			Count: many		Andy Lamb								PRESENT				Myxilla (Myxilla) lacunosa					iNaturalist:459826								Myxilla (Myxilla) lacunosa							Animalia	Porifera	Demospongiae	Poecilosclerida	Myxillidae	Myxilla	lacunosa		species		Lambe, 1893
	imerss.org:PMLS:16664			Count: many		Andy Lamb								PRESENT				Haliclona (Haliclona) sp.2					iNaturalist:1227087								Haliclona (Haliclona) sp.2							Animalia	Porifera	Demospongiae	Haplosclerida	Chalinidae	Haliclona	sp.2		species
	imerss.org:PMLS:16665			Count: few		Andy Lamb								PRESENT				Acarnus erithacus					iNaturalist:63669								Acarnus erithacus							Animalia	Porifera	Demospongiae	Poecilosclerida	Acarnidae	Acarnus	erithacus		species		de Laubenfels, 1927
	imerss.org:PMLS:16666			Count: many		Andy Lamb								PRESENT				Clathria (Microciona) pennata					iNaturalist:63672								Clathria (Microciona) pennata							Animalia	Porifera	Demospongiae	Poecilosclerida	Microcionidae	Clathria	pennata		species		(Lambe, 1895)
	imerss.org:PMLS:16667			Count: few		Andy Lamb								PRESENT				Mycale (Aegogropila) adhaerens					iNaturalist:256010								Mycale (Aegogropila) adhaerens							Animalia	Porifera	Demospongiae	Poecilosclerida	Mycalidae	Mycale	adhaerens		species		(Lambe, 1893)
	imerss.org:PMLS:16741			Count: some		Andy Lamb								PRESENT				Cliona californiana					iNaturalist:424811								Cliona californiana							Animalia	Porifera	Demospongiae	Clionaida	Clionaidae	Cliona	californiana		species		de Laubenfels, 1932
	imerss.org:PMLS:16742			Count: few		Andy Lamb								PRESENT				Clathria (Microciona) pennata					iNaturalist:63672								Clathria (Microciona) pennata							Animalia	Porifera	Demospongiae	Poecilosclerida	Microcionidae	Clathria	pennata		species		(Lambe, 1895)
	imerss.org:PMLS:16800			Count: some		Andy Lamb								PRESENT				Clathria (Microciona) pennata					iNaturalist:63672								Clathria (Microciona) pennata							Animalia	Porifera	Demospongiae	Poecilosclerida	Microcionidae	Clathria	pennata		species		(Lambe, 1895)
	imerss.org:PMLS:16885					Andy Lamb		2						PRESENT				Sycon spp.					iNaturalist:347738								Sycon							Animalia	Porifera	Calcarea	Leucosolenida	Sycettidae	Sycon			genus
	imerss.org:PMLS:16886					Andy Lamb		1						PRESENT				Craniella villosa					iNaturalist:459732								Craniella villosa							Animalia	Porifera	Demospongiae	Tetractinellida	Tetillidae	Craniella	villosa		species		Lambe, 1893
	imerss.org:PMLS:16887					Andy Lamb		1						PRESENT				Polymastia pachymastia					iNaturalist:117717								Polymastia pachymastia							Animalia	Porifera	Demospongiae	Polymastiida	Polymastiidae	Polymastia	pachymastia		species		de Laubenfels, 1932
	imerss.org:PMLS:16888			Count: many		Andy Lamb								PRESENT				Cliona californiana					iNaturalist:424811								Cliona californiana							Animalia	Porifera	Demospongiae	Clionaida	Clionaidae	Cliona	californiana		species		de Laubenfels, 1932
	imerss.org:PMLS:16889			Count: some		Andy Lamb								PRESENT				Myxilla (Myxilla) lacunosa					iNaturalist:459826								Myxilla (Myxilla) lacunosa							Animalia	Porifera	Demospongiae	Poecilosclerida	Myxillidae	Myxilla	lacunosa		species		Lambe, 1893
	imerss.org:PMLS:16890			Count: few		Andy Lamb								PRESENT				Halichondria (Halichondria) bowerbanki					iNaturalist:120498								Halichondria (Halichondria) bowerbanki							Animalia	Porifera	Demospongiae	Suberitida	Halichondriidae	Halichondria	bowerbanki		species		Burton, 1930
	imerss.org:PMLS:16891					Andy Lamb		3						PRESENT				Aplysilla sp. nov.					iNaturalist:63646								Aplysilla							Animalia	Porifera	Demospongiae	Dendroceratida	Darwinellidae	Aplysilla			genus
	imerss.org:PMLS:16892			Count: many		Andy Lamb								PRESENT				Clathria (Microciona) pennata					iNaturalist:63672								Clathria (Microciona) pennata							Animalia	Porifera	Demospongiae	Poecilosclerida	Microcionidae	Clathria	pennata		species		(Lambe, 1895)
	imerss.org:PMLS:16893			Count: few		Andy Lamb								PRESENT				Myxilla (Myxilla) incrustans					iNaturalist:256019								Myxilla (Myxilla) incrustans							Animalia	Porifera	Demospongiae	Poecilosclerida	Myxillidae	Myxilla	incrustans		species		(Johnston, 1842)
	imerss.org:PMLS:16894			Count: few		Andy Lamb								PRESENT				Mycale (Aegogropila) adhaerens					iNaturalist:256010								Mycale (Aegogropila) adhaerens							Animalia	Porifera	Demospongiae	Poecilosclerida	Mycalidae	Mycale	adhaerens		species		(Lambe, 1893)
	imerss.org:PMLS:16999			Count: some		Andy Lamb								PRESENT				Cliona californiana					iNaturalist:424811								Cliona californiana							Animalia	Porifera	Demospongiae	Clionaida	Clionaidae	Cliona	californiana		species		de Laubenfels, 1932
	imerss.org:PMLS:17046			Count: few		Andy Lamb								PRESENT				Craniella villosa					iNaturalist:459732								Craniella villosa							Animalia	Porifera	Demospongiae	Tetractinellida	Tetillidae	Craniella	villosa		species		Lambe, 1893
	imerss.org:PMLS:17047			Count: some		Andy Lamb								PRESENT				Cliona californiana					iNaturalist:424811								Cliona californiana							Animalia	Porifera	Demospongiae	Clionaida	Clionaidae	Cliona	californiana		species		de Laubenfels, 1932
	imerss.org:PMLS:17048			Count: few		Andy Lamb								PRESENT				Haliclona (Haliclona) sp.2					iNaturalist:1227087								Haliclona (Haliclona) sp.2							Animalia	Porifera	Demospongiae	Haplosclerida	Chalinidae	Haliclona	sp.2		species
	imerss.org:PMLS:17049			Count: some		Andy Lamb								PRESENT				Clathria (Microciona) pennata					iNaturalist:63672								Clathria (Microciona) pennata							Animalia	Porifera	Demospongiae	Poecilosclerida	Microcionidae	Clathria	pennata		species		(Lambe, 1895)
	imerss.org:PMLS:17096			Count: some		Andy Lamb								PRESENT				Cliona californiana					iNaturalist:424811								Cliona californiana							Animalia	Porifera	Demospongiae	Clionaida	Clionaidae	Cliona	californiana		species		de Laubenfels, 1932
	imerss.org:PMLS:17097					Andy Lamb		2						PRESENT				Myxilla (Myxilla) lacunosa					iNaturalist:459826								Myxilla (Myxilla) lacunosa							Animalia	Porifera	Demospongiae	Poecilosclerida	Myxillidae	Myxilla	lacunosa		species		Lambe, 1893
	imerss.org:PMLS:17098			Count: many		Andy Lamb								PRESENT				Clathria (Microciona) pennata					iNaturalist:63672								Clathria (Microciona) pennata							Animalia	Porifera	Demospongiae	Poecilosclerida	Microcionidae	Clathria	pennata		species		(Lambe, 1895)
	imerss.org:PMLS:17099			Count: some		Andy Lamb								PRESENT				Mycale (Aegogropila) adhaerens					iNaturalist:256010								Mycale (Aegogropila) adhaerens							Animalia	Porifera	Demospongiae	Poecilosclerida	Mycalidae	Mycale	adhaerens		species		(Lambe, 1893)
	imerss.org:PMLS:17182			Count: some		Andy Lamb								PRESENT				Cliona californiana					iNaturalist:424811								Cliona californiana							Animalia	Porifera	Demospongiae	Clionaida	Clionaidae	Cliona	californiana		species		de Laubenfels, 1932
	imerss.org:PMLS:17183			Count: few		Andy Lamb								PRESENT				Clathria (Microciona) pennata					iNaturalist:63672								Clathria (Microciona) pennata							Animalia	Porifera	Demospongiae	Poecilosclerida	Microcionidae	Clathria	pennata		species		(Lambe, 1895)
	imerss.org:PMLS:17264			Count: very many		Andy Lamb								PRESENT				Cliona californiana					iNaturalist:424811								Cliona californiana							Animalia	Porifera	Demospongiae	Clionaida	Clionaidae	Cliona	californiana		species		de Laubenfels, 1932
	imerss.org:PMLS:17265			Count: large		Andy Lamb								PRESENT				Xestospongia hispida					iNaturalist:873856								Xestospongia hispida							Animalia	Porifera	Demospongiae	Haplosclerida	Petrosiidae	Xestospongia	hispida		species		(Ridley & Dendy, 1886)
	imerss.org:PMLS:17266			Count: abundant		Andy Lamb								PRESENT				Myxilla (Myxilla) lacunosa					iNaturalist:459826								Myxilla (Myxilla) lacunosa							Animalia	Porifera	Demospongiae	Poecilosclerida	Myxillidae	Myxilla	lacunosa		species		Lambe, 1893
	imerss.org:PMLS:17267			Count: some		Andy Lamb								PRESENT				Halichondria (Halichondria) bowerbanki					iNaturalist:120498								Halichondria (Halichondria) bowerbanki							Animalia	Porifera	Demospongiae	Suberitida	Halichondriidae	Halichondria	bowerbanki		species		Burton, 1930
	imerss.org:PMLS:17268			Count: some		Andy Lamb								PRESENT				Haliclona (Haliclona) sp.2					iNaturalist:1227087								Haliclona (Haliclona) sp.2							Animalia	Porifera	Demospongiae	Haplosclerida	Chalinidae	Haliclona	sp.2		species
	imerss.org:PMLS:17269			Count: many		Andy Lamb								PRESENT				Aplysilla sp. nov.					iNaturalist:63646								Aplysilla							Animalia	Porifera	Demospongiae	Dendroceratida	Darwinellidae	Aplysilla			genus
	imerss.org:PMLS:17270			Count: few		Andy Lamb								PRESENT				Pleraplysilla sp. nov.					iNaturalist:623055								Pleraplysilla							Animalia	Porifera	Demospongiae	Dictyoceratida	Dysideidae	Pleraplysilla			genus
	imerss.org:PMLS:17271					Andy Lamb								PRESENT				Clathria (Microciona) pennata					iNaturalist:63672								Clathria (Microciona) pennata							Animalia	Porifera	Demospongiae	Poecilosclerida	Microcionidae	Clathria	pennata		species		(Lambe, 1895)
	imerss.org:PMLS:17272			Count: few		Andy Lamb								PRESENT				Myxilla (Myxilla) incrustans					iNaturalist:256019								Myxilla (Myxilla) incrustans							Animalia	Porifera	Demospongiae	Poecilosclerida	Myxillidae	Myxilla	incrustans		species		(Johnston, 1842)
	imerss.org:PMLS:17273			Count: few		Andy Lamb								PRESENT				Mycale (Aegogropila) adhaerens					iNaturalist:256010								Mycale (Aegogropila) adhaerens							Animalia	Porifera	Demospongiae	Poecilosclerida	Mycalidae	Mycale	adhaerens		species		(Lambe, 1893)
	imerss.org:PMLS:17372			Count: some		Andy Lamb								PRESENT				Cliona californiana					iNaturalist:424811								Cliona californiana							Animalia	Porifera	Demospongiae	Clionaida	Clionaidae	Cliona	californiana		species		de Laubenfels, 1932
	imerss.org:PMLS:17373					Andy Lamb								PRESENT				Clathria (Microciona) pennata					iNaturalist:63672								Clathria (Microciona) pennata							Animalia	Porifera	Demospongiae	Poecilosclerida	Microcionidae	Clathria	pennata		species		(Lambe, 1895)
	imerss.org:PMLS:17374			Count: few		Andy Lamb								PRESENT				Myxilla (Myxilla) incrustans					iNaturalist:256019								Myxilla (Myxilla) incrustans							Animalia	Porifera	Demospongiae	Poecilosclerida	Myxillidae	Myxilla	incrustans		species		(Johnston, 1842)
	imerss.org:PMLS:17375			Count: few		Andy Lamb								PRESENT				Mycale (Aegogropila) adhaerens					iNaturalist:256010								Mycale (Aegogropila) adhaerens							Animalia	Porifera	Demospongiae	Poecilosclerida	Mycalidae	Mycale	adhaerens		species		(Lambe, 1893)
	imerss.org:PMLS:17468					Andy Lamb		1						PRESENT				Leucosolenia nautilia					iNaturalist:347319								Leucosolenia nautilia							Animalia	Porifera	Calcarea	Leucosolenida	Leucosoleniidae	Leucosolenia	nautilia		species		de Laubenfels, 1930
	imerss.org:PMLS:17469			Count: some		Andy Lamb								PRESENT				Cliona californiana					iNaturalist:424811								Cliona californiana							Animalia	Porifera	Demospongiae	Clionaida	Clionaidae	Cliona	californiana		species		de Laubenfels, 1932
	imerss.org:PMLS:17470			Count: some		Andy Lamb								PRESENT				Clathria (Microciona) pennata					iNaturalist:63672								Clathria (Microciona) pennata							Animalia	Porifera	Demospongiae	Poecilosclerida	Microcionidae	Clathria	pennata		species		(Lambe, 1895)
	imerss.org:PMLS:17573			Count: few		Andy Lamb								PRESENT				Cliona californiana					iNaturalist:424811								Cliona californiana							Animalia	Porifera	Demospongiae	Clionaida	Clionaidae	Cliona	californiana		species		de Laubenfels, 1932
	imerss.org:PMLS:17574			Count: some		Andy Lamb								PRESENT				Clathria (Microciona) pennata					iNaturalist:63672								Clathria (Microciona) pennata							Animalia	Porifera	Demospongiae	Poecilosclerida	Microcionidae	Clathria	pennata		species		(Lambe, 1895)
	imerss.org:PMLS:17575					Andy Lamb		4						PRESENT				Mycale (Aegogropila) adhaerens					iNaturalist:256010								Mycale (Aegogropila) adhaerens							Animalia	Porifera	Demospongiae	Poecilosclerida	Mycalidae	Mycale	adhaerens		species		(Lambe, 1893)
	imerss.org:PMLS:17699					Andy Lamb		1						PRESENT				Leucosolenia nautilia					iNaturalist:347319								Leucosolenia nautilia							Animalia	Porifera	Calcarea	Leucosolenida	Leucosoleniidae	Leucosolenia	nautilia		species		de Laubenfels, 1930
	imerss.org:PMLS:17700			Count: some		Andy Lamb								PRESENT				Cliona californiana					iNaturalist:424811								Cliona californiana							Animalia	Porifera	Demospongiae	Clionaida	Clionaidae	Cliona	californiana		species		de Laubenfels, 1932
	imerss.org:PMLS:17701			Count: some		Andy Lamb								PRESENT				Clathria (Microciona) pennata					iNaturalist:63672								Clathria (Microciona) pennata							Animalia	Porifera	Demospongiae	Poecilosclerida	Microcionidae	Clathria	pennata		species		(Lambe, 1895)
	imerss.org:PMLS:17781					Andy Lamb		2						PRESENT				Cliona californiana					iNaturalist:424811								Cliona californiana							Animalia	Porifera	Demospongiae	Clionaida	Clionaidae	Cliona	californiana		species		de Laubenfels, 1932
	imerss.org:PMLS:17782			Count: few		Andy Lamb								PRESENT				Clathria (Microciona) pennata					iNaturalist:63672								Clathria (Microciona) pennata							Animalia	Porifera	Demospongiae	Poecilosclerida	Microcionidae	Clathria	pennata		species		(Lambe, 1895)
	imerss.org:PMLS:17817			Count: many		Andy Lamb								PRESENT				Cliona californiana					iNaturalist:424811								Cliona californiana							Animalia	Porifera	Demospongiae	Clionaida	Clionaidae	Cliona	californiana		species		de Laubenfels, 1932
	imerss.org:PMLS:17818			Count: few		Andy Lamb								PRESENT				Clathria (Microciona) pennata					iNaturalist:63672								Clathria (Microciona) pennata							Animalia	Porifera	Demospongiae	Poecilosclerida	Microcionidae	Clathria	pennata		species		(Lambe, 1895)
	imerss.org:PMLS:17959			Count: few		Andy Lamb								PRESENT				Leucosolenia eleanor					iNaturalist:424817								Leucosolenia eleanor							Animalia	Porifera	Calcarea	Leucosolenida	Leucosoleniidae	Leucosolenia	eleanor		species		Urban, 1906
	imerss.org:PMLS:17960			Count: few		Andy Lamb								PRESENT				Clathrina sp.					iNaturalist:122021								Clathrina							Animalia	Porifera	Calcarea	Clathrinida	Clathrinidae	Clathrina			genus
	imerss.org:PMLS:17961			Count: some		Andy Lamb								PRESENT				Cliona californiana					iNaturalist:424811								Cliona californiana							Animalia	Porifera	Demospongiae	Clionaida	Clionaidae	Cliona	californiana		species		de Laubenfels, 1932
	imerss.org:PMLS:17962			Count: few		Andy Lamb								PRESENT				Clathria (Microciona) pennata					iNaturalist:63672								Clathria (Microciona) pennata							Animalia	Porifera	Demospongiae	Poecilosclerida	Microcionidae	Clathria	pennata		species		(Lambe, 1895)
	imerss.org:PMLS:18043			Count: some		Andy Lamb								PRESENT				Cliona californiana					iNaturalist:424811								Cliona californiana							Animalia	Porifera	Demospongiae	Clionaida	Clionaidae	Cliona	californiana		species		de Laubenfels, 1932
	imerss.org:PMLS:18044					Andy Lamb		3						PRESENT				Clathria (Microciona) pennata					iNaturalist:63672								Clathria (Microciona) pennata							Animalia	Porifera	Demospongiae	Poecilosclerida	Microcionidae	Clathria	pennata		species		(Lambe, 1895)
	imerss.org:PMLS:18121					Andy Lamb		1						PRESENT				Polymastia pachymastia					iNaturalist:117717								Polymastia pachymastia							Animalia	Porifera	Demospongiae	Polymastiida	Polymastiidae	Polymastia	pachymastia		species		de Laubenfels, 1932
	imerss.org:PMLS:18122			Count: some		Andy Lamb								PRESENT				Cliona californiana					iNaturalist:424811								Cliona californiana							Animalia	Porifera	Demospongiae	Clionaida	Clionaidae	Cliona	californiana		species		de Laubenfels, 1932
	imerss.org:PMLS:18123			Count: few		Andy Lamb								PRESENT				Clathria (Microciona) pennata					iNaturalist:63672								Clathria (Microciona) pennata							Animalia	Porifera	Demospongiae	Poecilosclerida	Microcionidae	Clathria	pennata		species		(Lambe, 1895)
	imerss.org:PMLS:18124			Count: few		Andy Lamb								PRESENT				Myxilla (Myxilla) incrustans					iNaturalist:256019								Myxilla (Myxilla) incrustans							Animalia	Porifera	Demospongiae	Poecilosclerida	Myxillidae	Myxilla	incrustans		species		(Johnston, 1842)
	imerss.org:PMLS:18125			Count: few		Andy Lamb								PRESENT				Mycale (Aegogropila) adhaerens					iNaturalist:256010								Mycale (Aegogropila) adhaerens							Animalia	Porifera	Demospongiae	Poecilosclerida	Mycalidae	Mycale	adhaerens		species		(Lambe, 1893)
	imerss.org:PMLS:18244			Count: some		Andy Lamb								PRESENT				Cliona californiana					iNaturalist:424811								Cliona californiana							Animalia	Porifera	Demospongiae	Clionaida	Clionaidae	Cliona	californiana		species		de Laubenfels, 1932
	imerss.org:PMLS:18317					Andy Lamb		2						PRESENT				Leucandra sp.					iNaturalist:345497								Leucandra							Animalia	Porifera	Calcarea	Leucosolenida	Grantiidae	Leucandra			genus
	imerss.org:PMLS:18318			Count: some		Andy Lamb								PRESENT				Cliona californiana					iNaturalist:424811								Cliona californiana							Animalia	Porifera	Demospongiae	Clionaida	Clionaidae	Cliona	californiana		species		de Laubenfels, 1932
	imerss.org:PMLS:18319			Count: some		Andy Lamb								PRESENT				Clathria (Microciona) pennata					iNaturalist:63672								Clathria (Microciona) pennata							Animalia	Porifera	Demospongiae	Poecilosclerida	Microcionidae	Clathria	pennata		species		(Lambe, 1895)
	imerss.org:PMLS:18320					Andy Lamb		3						PRESENT				Mycale (Aegogropila) adhaerens					iNaturalist:256010								Mycale (Aegogropila) adhaerens							Animalia	Porifera	Demospongiae	Poecilosclerida	Mycalidae	Mycale	adhaerens		species		(Lambe, 1893)
	imerss.org:PMLS:18505			Count: very many		Stefania Gorgopa								PRESENT				Cliona californiana					iNaturalist:424811								Cliona californiana							Animalia	Porifera	Demospongiae	Clionaida	Clionaidae	Cliona	californiana		species		de Laubenfels, 1932
	imerss.org:iNat:2763468					Peter								PRESENT				Polymastia pachymastia					iNaturalist:117717								Polymastia pachymastia							Animalia	Porifera	Demospongiae	Polymastiida	Polymastiidae	Polymastia	pachymastia		species		de Laubenfels, 1932
	imerss.org:iNat:2975867					Peter								PRESENT				Craniella villosa					iNaturalist:459732								Craniella villosa							Animalia	Porifera	Demospongiae	Tetractinellida	Tetillidae	Craniella	villosa		species		Lambe, 1893
	imerss.org:iNat:2975914					Peter								PRESENT				Leucilla nuttingi					iNaturalist:117713								Leucilla nuttingi							Animalia	Porifera	Calcarea	Leucosolenida	Amphoriscidae	Leucilla	nuttingi		species		(Urban, 1902)
	imerss.org:iNat:8444078					Jackson W.F. Chu								PRESENT				Aphrocallistes vastus					iNaturalist:424651								Aphrocallistes vastus							Animalia	Porifera	Hexactinellida	Sceptrulophora	Aphrocallistidae	Aphrocallistes	vastus		species		Schulze, 1886
	imerss.org:iNat:8459011					Jackson W.F. Chu								PRESENT				Aphrocallistes vastus					iNaturalist:424651								Aphrocallistes vastus							Animalia	Porifera	Hexactinellida	Sceptrulophora	Aphrocallistidae	Aphrocallistes	vastus		species		Schulze, 1886
	imerss.org:iNat:8459012					Jackson W.F. Chu								PRESENT				Aphrocallistes vastus					iNaturalist:424651								Aphrocallistes vastus							Animalia	Porifera	Hexactinellida	Sceptrulophora	Aphrocallistidae	Aphrocallistes	vastus		species		Schulze, 1886
	imerss.org:iNat:8459013					Jackson W.F. Chu								PRESENT				Aphrocallistes vastus					iNaturalist:424651								Aphrocallistes vastus							Animalia	Porifera	Hexactinellida	Sceptrulophora	Aphrocallistidae	Aphrocallistes	vastus		species		Schulze, 1886
	imerss.org:iNat:8480049					Jackson W.F. Chu								PRESENT				Desmacella austini					iNaturalist:459736								Desmacella austini							Animalia	Porifera	Demospongiae	Desmacellida	Desmacellidae	Desmacella	austini		species		Lehnert, Conway, Barrie & Krautter, 2005
	imerss.org:iNat:59908525					Jackson W.F. Chu								PRESENT				Aphrocallistes vastus					iNaturalist:424651								Aphrocallistes vastus							Animalia	Porifera	Hexactinellida	Sceptrulophora	Aphrocallistidae	Aphrocallistes	vastus		species		Schulze, 1886
	imerss.org:iNat:59908526					Jackson W.F. Chu								PRESENT				Aphrocallistes vastus					iNaturalist:424651								Aphrocallistes vastus							Animalia	Porifera	Hexactinellida	Sceptrulophora	Aphrocallistidae	Aphrocallistes	vastus		species		Schulze, 1886
	imerss.org:iNat:59908528					Jackson W.F. Chu								PRESENT				Aphrocallistes vastus					iNaturalist:424651								Aphrocallistes vastus							Animalia	Porifera	Hexactinellida	Sceptrulophora	Aphrocallistidae	Aphrocallistes	vastus		species		Schulze, 1886
	imerss.org:iNat:59908529					Jackson W.F. Chu								PRESENT				Aphrocallistes vastus					iNaturalist:424651								Aphrocallistes vastus							Animalia	Porifera	Hexactinellida	Sceptrulophora	Aphrocallistidae	Aphrocallistes	vastus		species		Schulze, 1886
	imerss.org:iNat:59908530					Jackson W.F. Chu								PRESENT				Aphrocallistes vastus					iNaturalist:424651								Aphrocallistes vastus							Animalia	Porifera	Hexactinellida	Sceptrulophora	Aphrocallistidae	Aphrocallistes	vastus		species		Schulze, 1886
	imerss.org:iNat:59908532					Jackson W.F. Chu								PRESENT				Aphrocallistes vastus					iNaturalist:424651								Aphrocallistes vastus							Animalia	Porifera	Hexactinellida	Sceptrulophora	Aphrocallistidae	Aphrocallistes	vastus		species		Schulze, 1886
	imerss.org:iNat:59908533					Jackson W.F. Chu								PRESENT				Aphrocallistes vastus					iNaturalist:424651								Aphrocallistes vastus							Animalia	Porifera	Hexactinellida	Sceptrulophora	Aphrocallistidae	Aphrocallistes	vastus		species		Schulze, 1886
	imerss.org:iNat:59908535					Jackson W.F. Chu								PRESENT				Rhabdocalyptus dawsoni					iNaturalist:751673								Rhabdocalyptus dawsoni							Animalia	Porifera	Hexactinellida	Lyssacinosida	Rossellidae	Rhabdocalyptus	dawsoni		species		(Lambe, 1893)
	imerss.org:iNat:59908536					Jackson W.F. Chu								PRESENT				Aphrocallistes vastus					iNaturalist:424651								Aphrocallistes vastus							Animalia	Porifera	Hexactinellida	Sceptrulophora	Aphrocallistidae	Aphrocallistes	vastus		species		Schulze, 1886
	imerss.org:iNat:59908537					Jackson W.F. Chu								PRESENT				Aphrocallistes vastus					iNaturalist:424651								Aphrocallistes vastus							Animalia	Porifera	Hexactinellida	Sceptrulophora	Aphrocallistidae	Aphrocallistes	vastus		species		Schulze, 1886
	imerss.org:iNat:59908538					Jackson W.F. Chu								PRESENT				Aphrocallistes vastus					iNaturalist:424651								Aphrocallistes vastus							Animalia	Porifera	Hexactinellida	Sceptrulophora	Aphrocallistidae	Aphrocallistes	vastus		species		Schulze, 1886
	imerss.org:iNat:59908540					Jackson W.F. Chu								PRESENT				Aphrocallistes vastus					iNaturalist:424651								Aphrocallistes vastus							Animalia	Porifera	Hexactinellida	Sceptrulophora	Aphrocallistidae	Aphrocallistes	vastus		species		Schulze, 1886
	imerss.org:iNat:59908541					Jackson W.F. Chu								PRESENT				Aphrocallistes vastus					iNaturalist:424651								Aphrocallistes vastus							Animalia	Porifera	Hexactinellida	Sceptrulophora	Aphrocallistidae	Aphrocallistes	vastus		species		Schulze, 1886
	imerss.org:iNat:59908543					Jackson W.F. Chu								PRESENT				Aphrocallistes vastus					iNaturalist:424651								Aphrocallistes vastus							Animalia	Porifera	Hexactinellida	Sceptrulophora	Aphrocallistidae	Aphrocallistes	vastus		species		Schulze, 1886
	imerss.org:iNat:59908545					Jackson W.F. Chu								PRESENT				Aphrocallistes vastus					iNaturalist:424651								Aphrocallistes vastus							Animalia	Porifera	Hexactinellida	Sceptrulophora	Aphrocallistidae	Aphrocallistes	vastus		species		Schulze, 1886
	imerss.org:iNat:59908546					Jackson W.F. Chu								PRESENT				Aphrocallistes vastus					iNaturalist:424651								Aphrocallistes vastus							Animalia	Porifera	Hexactinellida	Sceptrulophora	Aphrocallistidae	Aphrocallistes	vastus		species		Schulze, 1886
	imerss.org:iNat:59908547					Jackson W.F. Chu								PRESENT				Aphrocallistes vastus					iNaturalist:424651								Aphrocallistes vastus							Animalia	Porifera	Hexactinellida	Sceptrulophora	Aphrocallistidae	Aphrocallistes	vastus		species		Schulze, 1886
	imerss.org:iNat:59908548					Jackson W.F. Chu								PRESENT				Aphrocallistes vastus					iNaturalist:424651								Aphrocallistes vastus							Animalia	Porifera	Hexactinellida	Sceptrulophora	Aphrocallistidae	Aphrocallistes	vastus		species		Schulze, 1886
	imerss.org:iNat:59908550					Jackson W.F. Chu								PRESENT				Aphrocallistes vastus					iNaturalist:424651								Aphrocallistes vastus							Animalia	Porifera	Hexactinellida	Sceptrulophora	Aphrocallistidae	Aphrocallistes	vastus		species		Schulze, 1886
	imerss.org:iNat:59908552					Jackson W.F. Chu								PRESENT				Aphrocallistes vastus					iNaturalist:424651								Aphrocallistes vastus							Animalia	Porifera	Hexactinellida	Sceptrulophora	Aphrocallistidae	Aphrocallistes	vastus		species		Schulze, 1886
	imerss.org:iNat:59908553					Jackson W.F. Chu								PRESENT				Aphrocallistes vastus					iNaturalist:424651								Aphrocallistes vastus							Animalia	Porifera	Hexactinellida	Sceptrulophora	Aphrocallistidae	Aphrocallistes	vastus		species		Schulze, 1886
	imerss.org:iNat:59908555					Jackson W.F. Chu								PRESENT				Aphrocallistes vastus					iNaturalist:424651								Aphrocallistes vastus							Animalia	Porifera	Hexactinellida	Sceptrulophora	Aphrocallistidae	Aphrocallistes	vastus		species		Schulze, 1886
	imerss.org:iNat:59908557					Jackson W.F. Chu								PRESENT				Aphrocallistes vastus					iNaturalist:424651								Aphrocallistes vastus							Animalia	Porifera	Hexactinellida	Sceptrulophora	Aphrocallistidae	Aphrocallistes	vastus		species		Schulze, 1886
	imerss.org:iNat:59908562					Jackson W.F. Chu								PRESENT				Desmacella austini					iNaturalist:459736								Desmacella austini							Animalia	Porifera	Demospongiae	Desmacellida	Desmacellidae	Desmacella	austini		species		Lehnert, Conway, Barrie & Krautter, 2005
	imerss.org:iNat:59908565					Jackson W.F. Chu								PRESENT				Aphrocallistes vastus					iNaturalist:424651								Aphrocallistes vastus							Animalia	Porifera	Hexactinellida	Sceptrulophora	Aphrocallistidae	Aphrocallistes	vastus		species		Schulze, 1886
	imerss.org:iNat:59908567					Jackson W.F. Chu								PRESENT				Rhabdocalyptus dawsoni					iNaturalist:751673								Rhabdocalyptus dawsoni							Animalia	Porifera	Hexactinellida	Lyssacinosida	Rossellidae	Rhabdocalyptus	dawsoni		species		(Lambe, 1893)
	imerss.org:iNat:59908568					Jackson W.F. Chu								PRESENT				Aphrocallistes vastus					iNaturalist:424651								Aphrocallistes vastus							Animalia	Porifera	Hexactinellida	Sceptrulophora	Aphrocallistidae	Aphrocallistes	vastus		species		Schulze, 1886
	imerss.org:iNat:59908569					Jackson W.F. Chu								PRESENT				Aphrocallistes vastus					iNaturalist:424651								Aphrocallistes vastus							Animalia	Porifera	Hexactinellida	Sceptrulophora	Aphrocallistidae	Aphrocallistes	vastus		species		Schulze, 1886
	imerss.org:iNat:59908573					Jackson W.F. Chu								PRESENT				Aphrocallistes vastus					iNaturalist:424651								Aphrocallistes vastus							Animalia	Porifera	Hexactinellida	Sceptrulophora	Aphrocallistidae	Aphrocallistes	vastus		species		Schulze, 1886
	imerss.org:iNat:59908574					Jackson W.F. Chu								PRESENT				Aphrocallistes vastus					iNaturalist:424651								Aphrocallistes vastus							Animalia	Porifera	Hexactinellida	Sceptrulophora	Aphrocallistidae	Aphrocallistes	vastus		species		Schulze, 1886
	imerss.org:iNat:59908584					Jackson W.F. Chu								PRESENT				Aphrocallistes vastus					iNaturalist:424651								Aphrocallistes vastus							Animalia	Porifera	Hexactinellida	Sceptrulophora	Aphrocallistidae	Aphrocallistes	vastus		species		Schulze, 1886
	imerss.org:iNat:59908586					Jackson W.F. Chu								PRESENT				Aphrocallistes vastus					iNaturalist:424651								Aphrocallistes vastus							Animalia	Porifera	Hexactinellida	Sceptrulophora	Aphrocallistidae	Aphrocallistes	vastus		species		Schulze, 1886
	imerss.org:iNat:59908587					Jackson W.F. Chu								PRESENT				Aphrocallistes vastus					iNaturalist:424651								Aphrocallistes vastus							Animalia	Porifera	Hexactinellida	Sceptrulophora	Aphrocallistidae	Aphrocallistes	vastus		species		Schulze, 1886
	imerss.org:iNat:59919988					Jackson W.F. Chu								PRESENT				Aphrocallistes vastus					iNaturalist:424651								Aphrocallistes vastus							Animalia	Porifera	Hexactinellida	Sceptrulophora	Aphrocallistidae	Aphrocallistes	vastus		species		Schulze, 1886
	imerss.org:iNat:59919989					Jackson W.F. Chu								PRESENT				Aphrocallistes vastus					iNaturalist:424651								Aphrocallistes vastus							Animalia	Porifera	Hexactinellida	Sceptrulophora	Aphrocallistidae	Aphrocallistes	vastus		species		Schulze, 1886
	imerss.org:iNat:59919990					Jackson W.F. Chu								PRESENT				Aphrocallistes vastus					iNaturalist:424651								Aphrocallistes vastus							Animalia	Porifera	Hexactinellida	Sceptrulophora	Aphrocallistidae	Aphrocallistes	vastus		species		Schulze, 1886
	imerss.org:iNat:59919992					Jackson W.F. Chu								PRESENT				Aphrocallistes vastus					iNaturalist:424651								Aphrocallistes vastus							Animalia	Porifera	Hexactinellida	Sceptrulophora	Aphrocallistidae	Aphrocallistes	vastus		species		Schulze, 1886
	imerss.org:iNat:59919993					Jackson W.F. Chu								PRESENT				Aphrocallistes vastus					iNaturalist:424651								Aphrocallistes vastus							Animalia	Porifera	Hexactinellida	Sceptrulophora	Aphrocallistidae	Aphrocallistes	vastus		species		Schulze, 1886
	imerss.org:iNat:59919994					Jackson W.F. Chu								PRESENT				Aphrocallistes vastus					iNaturalist:424651								Aphrocallistes vastus							Animalia	Porifera	Hexactinellida	Sceptrulophora	Aphrocallistidae	Aphrocallistes	vastus		species		Schulze, 1886
	imerss.org:iNat:59919996					Jackson W.F. Chu								PRESENT				Aphrocallistes vastus					iNaturalist:424651								Aphrocallistes vastus							Animalia	Porifera	Hexactinellida	Sceptrulophora	Aphrocallistidae	Aphrocallistes	vastus		species		Schulze, 1886
	imerss.org:iNat:59919998					Jackson W.F. Chu								PRESENT				Aphrocallistes vastus					iNaturalist:424651								Aphrocallistes vastus							Animalia	Porifera	Hexactinellida	Sceptrulophora	Aphrocallistidae	Aphrocallistes	vastus		species		Schulze, 1886
	imerss.org:iNat:59919999					Jackson W.F. Chu								PRESENT				Aphrocallistes vastus					iNaturalist:424651								Aphrocallistes vastus							Animalia	Porifera	Hexactinellida	Sceptrulophora	Aphrocallistidae	Aphrocallistes	vastus		species		Schulze, 1886
	imerss.org:iNat:59920001					Jackson W.F. Chu								PRESENT				Aphrocallistes vastus					iNaturalist:424651								Aphrocallistes vastus							Animalia	Porifera	Hexactinellida	Sceptrulophora	Aphrocallistidae	Aphrocallistes	vastus		species		Schulze, 1886
	imerss.org:iNat:59920002					Jackson W.F. Chu								PRESENT				Aphrocallistes vastus					iNaturalist:424651								Aphrocallistes vastus							Animalia	Porifera	Hexactinellida	Sceptrulophora	Aphrocallistidae	Aphrocallistes	vastus		species		Schulze, 1886
	imerss.org:iNat:59920003					Jackson W.F. Chu								PRESENT				Aphrocallistes vastus					iNaturalist:424651								Aphrocallistes vastus							Animalia	Porifera	Hexactinellida	Sceptrulophora	Aphrocallistidae	Aphrocallistes	vastus		species		Schulze, 1886
	imerss.org:iNat:59920004					Jackson W.F. Chu								PRESENT				Aphrocallistes vastus					iNaturalist:424651								Aphrocallistes vastus							Animalia	Porifera	Hexactinellida	Sceptrulophora	Aphrocallistidae	Aphrocallistes	vastus		species		Schulze, 1886
	imerss.org:iNat:59920005					Jackson W.F. Chu								PRESENT				Aphrocallistes vastus					iNaturalist:424651								Aphrocallistes vastus							Animalia	Porifera	Hexactinellida	Sceptrulophora	Aphrocallistidae	Aphrocallistes	vastus		species		Schulze, 1886
	imerss.org:iNat:59920006					Jackson W.F. Chu								PRESENT				Aphrocallistes vastus					iNaturalist:424651								Aphrocallistes vastus							Animalia	Porifera	Hexactinellida	Sceptrulophora	Aphrocallistidae	Aphrocallistes	vastus		species		Schulze, 1886
	imerss.org:iNat:59920007					Jackson W.F. Chu								PRESENT				Aphrocallistes vastus					iNaturalist:424651								Aphrocallistes vastus							Animalia	Porifera	Hexactinellida	Sceptrulophora	Aphrocallistidae	Aphrocallistes	vastus		species		Schulze, 1886
	imerss.org:iNat:59920008					Jackson W.F. Chu								PRESENT				Aphrocallistes vastus					iNaturalist:424651								Aphrocallistes vastus							Animalia	Porifera	Hexactinellida	Sceptrulophora	Aphrocallistidae	Aphrocallistes	vastus		species		Schulze, 1886
	imerss.org:iNat:59920009					Jackson W.F. Chu								PRESENT				Aphrocallistes vastus					iNaturalist:424651								Aphrocallistes vastus							Animalia	Porifera	Hexactinellida	Sceptrulophora	Aphrocallistidae	Aphrocallistes	vastus		species		Schulze, 1886
	imerss.org:iNat:59920010					Jackson W.F. Chu								PRESENT				Aphrocallistes vastus					iNaturalist:424651								Aphrocallistes vastus							Animalia	Porifera	Hexactinellida	Sceptrulophora	Aphrocallistidae	Aphrocallistes	vastus		species		Schulze, 1886
	imerss.org:iNat:59920012					Jackson W.F. Chu								PRESENT				Aphrocallistes vastus					iNaturalist:424651								Aphrocallistes vastus							Animalia	Porifera	Hexactinellida	Sceptrulophora	Aphrocallistidae	Aphrocallistes	vastus		species		Schulze, 1886
	imerss.org:iNat:59920013					Jackson W.F. Chu								PRESENT				Aphrocallistes vastus					iNaturalist:424651								Aphrocallistes vastus							Animalia	Porifera	Hexactinellida	Sceptrulophora	Aphrocallistidae	Aphrocallistes	vastus		species		Schulze, 1886
	imerss.org:iNat:59920014					Jackson W.F. Chu								PRESENT				Aphrocallistes vastus					iNaturalist:424651								Aphrocallistes vastus							Animalia	Porifera	Hexactinellida	Sceptrulophora	Aphrocallistidae	Aphrocallistes	vastus		species		Schulze, 1886
	imerss.org:iNat:59920015					Jackson W.F. Chu								PRESENT				Aphrocallistes vastus					iNaturalist:424651								Aphrocallistes vastus							Animalia	Porifera	Hexactinellida	Sceptrulophora	Aphrocallistidae	Aphrocallistes	vastus		species		Schulze, 1886
	imerss.org:iNat:59920016					Jackson W.F. Chu								PRESENT				Aphrocallistes vastus					iNaturalist:424651								Aphrocallistes vastus							Animalia	Porifera	Hexactinellida	Sceptrulophora	Aphrocallistidae	Aphrocallistes	vastus		species		Schulze, 1886
	imerss.org:iNat:59920018					Jackson W.F. Chu								PRESENT				Aphrocallistes vastus					iNaturalist:424651								Aphrocallistes vastus							Animalia	Porifera	Hexactinellida	Sceptrulophora	Aphrocallistidae	Aphrocallistes	vastus		species		Schulze, 1886
	imerss.org:iNat:59920019					Jackson W.F. Chu								PRESENT				Aphrocallistes vastus					iNaturalist:424651								Aphrocallistes vastus							Animalia	Porifera	Hexactinellida	Sceptrulophora	Aphrocallistidae	Aphrocallistes	vastus		species		Schulze, 1886
	imerss.org:iNat:59920020					Jackson W.F. Chu								PRESENT				Aphrocallistes vastus					iNaturalist:424651								Aphrocallistes vastus							Animalia	Porifera	Hexactinellida	Sceptrulophora	Aphrocallistidae	Aphrocallistes	vastus		species		Schulze, 1886
	imerss.org:iNat:59920023					Jackson W.F. Chu								PRESENT				Aphrocallistes vastus					iNaturalist:424651								Aphrocallistes vastus							Animalia	Porifera	Hexactinellida	Sceptrulophora	Aphrocallistidae	Aphrocallistes	vastus		species		Schulze, 1886
	imerss.org:iNat:59920025					Jackson W.F. Chu								PRESENT				Aphrocallistes vastus					iNaturalist:424651								Aphrocallistes vastus							Animalia	Porifera	Hexactinellida	Sceptrulophora	Aphrocallistidae	Aphrocallistes	vastus		species		Schulze, 1886
	imerss.org:iNat:59920027					Jackson W.F. Chu								PRESENT				Aphrocallistes vastus					iNaturalist:424651								Aphrocallistes vastus							Animalia	Porifera	Hexactinellida	Sceptrulophora	Aphrocallistidae	Aphrocallistes	vastus		species		Schulze, 1886
	imerss.org:iNat:59920028					Jackson W.F. Chu								PRESENT				Aphrocallistes vastus					iNaturalist:424651								Aphrocallistes vastus							Animalia	Porifera	Hexactinellida	Sceptrulophora	Aphrocallistidae	Aphrocallistes	vastus		species		Schulze, 1886
	imerss.org:iNat:59920032					Jackson W.F. Chu								PRESENT				Aphrocallistes vastus					iNaturalist:424651								Aphrocallistes vastus							Animalia	Porifera	Hexactinellida	Sceptrulophora	Aphrocallistidae	Aphrocallistes	vastus		species		Schulze, 1886
	imerss.org:iNat:59920034					Jackson W.F. Chu								PRESENT				Aphrocallistes vastus					iNaturalist:424651								Aphrocallistes vastus							Animalia	Porifera	Hexactinellida	Sceptrulophora	Aphrocallistidae	Aphrocallistes	vastus		species		Schulze, 1886
	imerss.org:iNat:59920036					Jackson W.F. Chu								PRESENT				Aphrocallistes vastus					iNaturalist:424651								Aphrocallistes vastus							Animalia	Porifera	Hexactinellida	Sceptrulophora	Aphrocallistidae	Aphrocallistes	vastus		species		Schulze, 1886
	imerss.org:iNat:59920039					Jackson W.F. Chu								PRESENT				Aphrocallistes vastus					iNaturalist:424651								Aphrocallistes vastus							Animalia	Porifera	Hexactinellida	Sceptrulophora	Aphrocallistidae	Aphrocallistes	vastus		species		Schulze, 1886
	imerss.org:iNat:59920040					Jackson W.F. Chu								PRESENT				Aphrocallistes vastus					iNaturalist:424651								Aphrocallistes vastus							Animalia	Porifera	Hexactinellida	Sceptrulophora	Aphrocallistidae	Aphrocallistes	vastus		species		Schulze, 1886
	imerss.org:iNat:59920045					Jackson W.F. Chu								PRESENT				Aphrocallistes vastus					iNaturalist:424651								Aphrocallistes vastus							Animalia	Porifera	Hexactinellida	Sceptrulophora	Aphrocallistidae	Aphrocallistes	vastus		species		Schulze, 1886
	imerss.org:iNat:59920046					Jackson W.F. Chu								PRESENT				Aphrocallistes vastus					iNaturalist:424651								Aphrocallistes vastus							Animalia	Porifera	Hexactinellida	Sceptrulophora	Aphrocallistidae	Aphrocallistes	vastus		species		Schulze, 1886
	imerss.org:iNat:59920049					Jackson W.F. Chu								PRESENT				Aphrocallistes vastus					iNaturalist:424651								Aphrocallistes vastus							Animalia	Porifera	Hexactinellida	Sceptrulophora	Aphrocallistidae	Aphrocallistes	vastus		species		Schulze, 1886
	imerss.org:iNat:60467720					Jackson W.F. Chu								PRESENT				Aphrocallistes vastus					iNaturalist:424651								Aphrocallistes vastus							Animalia	Porifera	Hexactinellida	Sceptrulophora	Aphrocallistidae	Aphrocallistes	vastus		species		Schulze, 1886
	imerss.org:iNat:60619085					Jackson W.F. Chu								PRESENT				Aphrocallistes vastus					iNaturalist:424651								Aphrocallistes vastus							Animalia	Porifera	Hexactinellida	Sceptrulophora	Aphrocallistidae	Aphrocallistes	vastus		species		Schulze, 1886
	imerss.org:iNat:60619086					Jackson W.F. Chu								PRESENT				Aphrocallistes vastus					iNaturalist:424651								Aphrocallistes vastus							Animalia	Porifera	Hexactinellida	Sceptrulophora	Aphrocallistidae	Aphrocallistes	vastus		species		Schulze, 1886
	imerss.org:iNat:60619088					Jackson W.F. Chu								PRESENT				Aphrocallistes vastus					iNaturalist:424651								Aphrocallistes vastus							Animalia	Porifera	Hexactinellida	Sceptrulophora	Aphrocallistidae	Aphrocallistes	vastus		species		Schulze, 1886
	imerss.org:iNat:60619089					Jackson W.F. Chu								PRESENT				Aphrocallistes vastus					iNaturalist:424651								Aphrocallistes vastus							Animalia	Porifera	Hexactinellida	Sceptrulophora	Aphrocallistidae	Aphrocallistes	vastus		species		Schulze, 1886
	imerss.org:iNat:60619094					Jackson W.F. Chu								PRESENT				Rhabdocalyptus dawsoni					iNaturalist:751673								Rhabdocalyptus dawsoni							Animalia	Porifera	Hexactinellida	Lyssacinosida	Rossellidae	Rhabdocalyptus	dawsoni		species		(Lambe, 1893)
	imerss.org:iNat:61341030					Jackson W.F. Chu								PRESENT				Rhabdocalyptus dawsoni					iNaturalist:751673								Rhabdocalyptus dawsoni							Animalia	Porifera	Hexactinellida	Lyssacinosida	Rossellidae	Rhabdocalyptus	dawsoni		species		(Lambe, 1893)
	imerss.org:iNat:63051919					Jackson W.F. Chu								PRESENT				Aphrocallistes vastus					iNaturalist:424651								Aphrocallistes vastus							Animalia	Porifera	Hexactinellida	Sceptrulophora	Aphrocallistidae	Aphrocallistes	vastus		species		Schulze, 1886
	imerss.org:iNat:63051920					Jackson W.F. Chu								PRESENT				Aphrocallistes vastus					iNaturalist:424651								Aphrocallistes vastus							Animalia	Porifera	Hexactinellida	Sceptrulophora	Aphrocallistidae	Aphrocallistes	vastus		species		Schulze, 1886
	imerss.org:iNat:63051921					Jackson W.F. Chu								PRESENT				Aphrocallistes vastus					iNaturalist:424651								Aphrocallistes vastus							Animalia	Porifera	Hexactinellida	Sceptrulophora	Aphrocallistidae	Aphrocallistes	vastus		species		Schulze, 1886
	imerss.org:iNat:63051922					Jackson W.F. Chu								PRESENT				Aphrocallistes vastus					iNaturalist:424651								Aphrocallistes vastus							Animalia	Porifera	Hexactinellida	Sceptrulophora	Aphrocallistidae	Aphrocallistes	vastus		species		Schulze, 1886
	imerss.org:iNat:63051923					Jackson W.F. Chu								PRESENT				Aphrocallistes vastus					iNaturalist:424651								Aphrocallistes vastus							Animalia	Porifera	Hexactinellida	Sceptrulophora	Aphrocallistidae	Aphrocallistes	vastus		species		Schulze, 1886
	imerss.org:iNat:63051924					Jackson W.F. Chu								PRESENT				Aphrocallistes vastus					iNaturalist:424651								Aphrocallistes vastus							Animalia	Porifera	Hexactinellida	Sceptrulophora	Aphrocallistidae	Aphrocallistes	vastus		species		Schulze, 1886
	imerss.org:iNat:63051925					Jackson W.F. Chu								PRESENT				Aphrocallistes vastus					iNaturalist:424651								Aphrocallistes vastus							Animalia	Porifera	Hexactinellida	Sceptrulophora	Aphrocallistidae	Aphrocallistes	vastus		species		Schulze, 1886
	imerss.org:iNat:63051926					Jackson W.F. Chu								PRESENT				Aphrocallistes vastus					iNaturalist:424651								Aphrocallistes vastus							Animalia	Porifera	Hexactinellida	Sceptrulophora	Aphrocallistidae	Aphrocallistes	vastus		species		Schulze, 1886
	imerss.org:iNat:69820984					Jackson W.F. Chu								PRESENT				Aphrocallistes vastus					iNaturalist:424651								Aphrocallistes vastus							Animalia	Porifera	Hexactinellida	Sceptrulophora	Aphrocallistidae	Aphrocallistes	vastus		species		Schulze, 1886
	imerss.org:iNat:70790700					Dave Zeuss Cochrane								PRESENT				Cliona californiana					iNaturalist:424811								Cliona californiana							Animalia	Porifera	Demospongiae	Clionaida	Clionaidae	Cliona	californiana		species		de Laubenfels, 1932
	ade2c3e0-c84e-4437-ad4d-d07da053d65d	016-00066-001				Jackson Chu								PRESENT				Aphrocallistes vastus					iNaturalist:424651								Aphrocallistes vastus							Animalia	Porifera	Hexactinellida	Sceptrulophora	Aphrocallistidae	Aphrocallistes	vastus		species		Schulze, 1886
	96ce4f3d-ef5d-48b2-883f-0b45b24defbf	973-00137-003				Philip Lambert		1						PRESENT				Myxilla incrustans					iNaturalist:256019								Myxilla (Myxilla) incrustans							Animalia	Porifera	Demospongiae	Poecilosclerida	Myxillidae	Myxilla	incrustans		species		(Johnston, 1842)
	86fb15f8-4e59-4c17-b5d5-e186c77894ac	016-00066-002				Jackson Chu								PRESENT				Aphrocallistes vastus					iNaturalist:424651								Aphrocallistes vastus							Animalia	Porifera	Hexactinellida	Sceptrulophora	Aphrocallistidae	Aphrocallistes	vastus		species		Schulze, 1886
	21fbea67-8343-4f13-8ae4-270d7db4c592	981-00064-001				W. Clemens		2						PRESENT				Isodictya rigida					iNaturalist:459878								Isodictya rigida							Animalia	Porifera	Demospongiae	Poecilosclerida	Isodictyidae	Isodictya	rigida		species		(Lambe, 1893)
	imerss.org:CHU2010:1					Jackson W.F. Chu		3						PRESENT				Stylissa stipitata		Chu JWF, Leys SP (2010) High resolution mapping of community structure in three glass sponge reefs (Porifera, Hexactinellida). Marine Ecology Progress Series 417: 97‑113. https://doi.org/10.7939/r36k3q			iNaturalist:194571								Semisuberites cribrosa							Animalia	Porifera	Demospongiae	Poecilosclerida	Esperiopsidae	Semisuberites	cribrosa		species		(Miklucho-Maclay, 1870)
	imerss.org:CHU2010:3					Jackson W.F. Chu		1						PRESENT				Stylissa stipitata		Chu JWF, Leys SP (2010) High resolution mapping of community structure in three glass sponge reefs (Porifera, Hexactinellida). Marine Ecology Progress Series 417: 97‑113. https://doi.org/10.7939/r36k3q			iNaturalist:194571								Semisuberites cribrosa							Animalia	Porifera	Demospongiae	Poecilosclerida	Esperiopsidae	Semisuberites	cribrosa		species		(Miklucho-Maclay, 1870)
	imerss.org:CHU2010:9					Jackson W.F. Chu		3						PRESENT				Stylissa stipitata		Chu JWF, Leys SP (2010) High resolution mapping of community structure in three glass sponge reefs (Porifera, Hexactinellida). Marine Ecology Progress Series 417: 97‑113. https://doi.org/10.7939/r36k3q			iNaturalist:194571								Semisuberites cribrosa							Animalia	Porifera	Demospongiae	Poecilosclerida	Esperiopsidae	Semisuberites	cribrosa		species		(Miklucho-Maclay, 1870)
	imerss.org:CHU2010:10					Jackson W.F. Chu		3						PRESENT				Stylissa stipitata		Chu JWF, Leys SP (2010) High resolution mapping of community structure in three glass sponge reefs (Porifera, Hexactinellida). Marine Ecology Progress Series 417: 97‑113. https://doi.org/10.7939/r36k3q			iNaturalist:194571								Semisuberites cribrosa							Animalia	Porifera	Demospongiae	Poecilosclerida	Esperiopsidae	Semisuberites	cribrosa		species		(Miklucho-Maclay, 1870)
	imerss.org:CHU2010:11					Jackson W.F. Chu		2						PRESENT				Stylissa stipitata		Chu JWF, Leys SP (2010) High resolution mapping of community structure in three glass sponge reefs (Porifera, Hexactinellida). Marine Ecology Progress Series 417: 97‑113. https://doi.org/10.7939/r36k3q			iNaturalist:194571								Semisuberites cribrosa							Animalia	Porifera	Demospongiae	Poecilosclerida	Esperiopsidae	Semisuberites	cribrosa		species		(Miklucho-Maclay, 1870)
	imerss.org:CHU2010:12					Jackson W.F. Chu		1						PRESENT				Stylissa stipitata		Chu JWF, Leys SP (2010) High resolution mapping of community structure in three glass sponge reefs (Porifera, Hexactinellida). Marine Ecology Progress Series 417: 97‑113. https://doi.org/10.7939/r36k3q			iNaturalist:194571								Semisuberites cribrosa							Animalia	Porifera	Demospongiae	Poecilosclerida	Esperiopsidae	Semisuberites	cribrosa		species		(Miklucho-Maclay, 1870)
	imerss.org:CHU2010:13					Jackson W.F. Chu		12						PRESENT				Stylissa stipitata		Chu JWF, Leys SP (2010) High resolution mapping of community structure in three glass sponge reefs (Porifera, Hexactinellida). Marine Ecology Progress Series 417: 97‑113. https://doi.org/10.7939/r36k3q			iNaturalist:194571								Semisuberites cribrosa							Animalia	Porifera	Demospongiae	Poecilosclerida	Esperiopsidae	Semisuberites	cribrosa		species		(Miklucho-Maclay, 1870)
	imerss.org:CHU2010:14					Jackson W.F. Chu		4						PRESENT				Stylissa stipitata		Chu JWF, Leys SP (2010) High resolution mapping of community structure in three glass sponge reefs (Porifera, Hexactinellida). Marine Ecology Progress Series 417: 97‑113. https://doi.org/10.7939/r36k3q			iNaturalist:194571								Semisuberites cribrosa							Animalia	Porifera	Demospongiae	Poecilosclerida	Esperiopsidae	Semisuberites	cribrosa		species		(Miklucho-Maclay, 1870)
	imerss.org:CHU2010:15					Jackson W.F. Chu		2						PRESENT				Stylissa stipitata		Chu JWF, Leys SP (2010) High resolution mapping of community structure in three glass sponge reefs (Porifera, Hexactinellida). Marine Ecology Progress Series 417: 97‑113. https://doi.org/10.7939/r36k3q			iNaturalist:194571								Semisuberites cribrosa							Animalia	Porifera	Demospongiae	Poecilosclerida	Esperiopsidae	Semisuberites	cribrosa		species		(Miklucho-Maclay, 1870)
	imerss.org:CHU2010:16					Jackson W.F. Chu		1						PRESENT				Stylissa stipitata		Chu JWF, Leys SP (2010) High resolution mapping of community structure in three glass sponge reefs (Porifera, Hexactinellida). Marine Ecology Progress Series 417: 97‑113. https://doi.org/10.7939/r36k3q			iNaturalist:194571								Semisuberites cribrosa							Animalia	Porifera	Demospongiae	Poecilosclerida	Esperiopsidae	Semisuberites	cribrosa		species		(Miklucho-Maclay, 1870)
	imerss.org:CHU2010:17					Jackson W.F. Chu		1						PRESENT				Stylissa stipitata		Chu JWF, Leys SP (2010) High resolution mapping of community structure in three glass sponge reefs (Porifera, Hexactinellida). Marine Ecology Progress Series 417: 97‑113. https://doi.org/10.7939/r36k3q			iNaturalist:194571								Semisuberites cribrosa							Animalia	Porifera	Demospongiae	Poecilosclerida	Esperiopsidae	Semisuberites	cribrosa		species		(Miklucho-Maclay, 1870)
	imerss.org:CHU2010:19					Jackson W.F. Chu		2						PRESENT				Stylissa stipitata		Chu JWF, Leys SP (2010) High resolution mapping of community structure in three glass sponge reefs (Porifera, Hexactinellida). Marine Ecology Progress Series 417: 97‑113. https://doi.org/10.7939/r36k3q			iNaturalist:194571								Semisuberites cribrosa							Animalia	Porifera	Demospongiae	Poecilosclerida	Esperiopsidae	Semisuberites	cribrosa		species		(Miklucho-Maclay, 1870)
	imerss.org:CHU2010:27					Jackson W.F. Chu		1						PRESENT				Stylissa stipitata		Chu JWF, Leys SP (2010) High resolution mapping of community structure in three glass sponge reefs (Porifera, Hexactinellida). Marine Ecology Progress Series 417: 97‑113. https://doi.org/10.7939/r36k3q			iNaturalist:194571								Semisuberites cribrosa							Animalia	Porifera	Demospongiae	Poecilosclerida	Esperiopsidae	Semisuberites	cribrosa		species		(Miklucho-Maclay, 1870)
	imerss.org:CHU2010:28					Jackson W.F. Chu		3						PRESENT				Stylissa stipitata		Chu JWF, Leys SP (2010) High resolution mapping of community structure in three glass sponge reefs (Porifera, Hexactinellida). Marine Ecology Progress Series 417: 97‑113. https://doi.org/10.7939/r36k3q			iNaturalist:194571								Semisuberites cribrosa							Animalia	Porifera	Demospongiae	Poecilosclerida	Esperiopsidae	Semisuberites	cribrosa		species		(Miklucho-Maclay, 1870)
	imerss.org:CHU2010:29					Jackson W.F. Chu		4						PRESENT				Stylissa stipitata		Chu JWF, Leys SP (2010) High resolution mapping of community structure in three glass sponge reefs (Porifera, Hexactinellida). Marine Ecology Progress Series 417: 97‑113. https://doi.org/10.7939/r36k3q			iNaturalist:194571								Semisuberites cribrosa							Animalia	Porifera	Demospongiae	Poecilosclerida	Esperiopsidae	Semisuberites	cribrosa		species		(Miklucho-Maclay, 1870)
	imerss.org:CHU2010:30					Jackson W.F. Chu		5						PRESENT				Stylissa stipitata		Chu JWF, Leys SP (2010) High resolution mapping of community structure in three glass sponge reefs (Porifera, Hexactinellida). Marine Ecology Progress Series 417: 97‑113. https://doi.org/10.7939/r36k3q			iNaturalist:194571								Semisuberites cribrosa							Animalia	Porifera	Demospongiae	Poecilosclerida	Esperiopsidae	Semisuberites	cribrosa		species		(Miklucho-Maclay, 1870)
	imerss.org:CHU2010:32					Jackson W.F. Chu		2						PRESENT				Stylissa stipitata		Chu JWF, Leys SP (2010) High resolution mapping of community structure in three glass sponge reefs (Porifera, Hexactinellida). Marine Ecology Progress Series 417: 97‑113. https://doi.org/10.7939/r36k3q			iNaturalist:194571								Semisuberites cribrosa							Animalia	Porifera	Demospongiae	Poecilosclerida	Esperiopsidae	Semisuberites	cribrosa		species		(Miklucho-Maclay, 1870)
	imerss.org:CHU2010:33					Jackson W.F. Chu		1						PRESENT				Stylissa stipitata		Chu JWF, Leys SP (2010) High resolution mapping of community structure in three glass sponge reefs (Porifera, Hexactinellida). Marine Ecology Progress Series 417: 97‑113. https://doi.org/10.7939/r36k3q			iNaturalist:194571								Semisuberites cribrosa							Animalia	Porifera	Demospongiae	Poecilosclerida	Esperiopsidae	Semisuberites	cribrosa		species		(Miklucho-Maclay, 1870)
	imerss.org:CHU2010:34					Jackson W.F. Chu		1						PRESENT				Stylissa stipitata		Chu JWF, Leys SP (2010) High resolution mapping of community structure in three glass sponge reefs (Porifera, Hexactinellida). Marine Ecology Progress Series 417: 97‑113. https://doi.org/10.7939/r36k3q			iNaturalist:194571								Semisuberites cribrosa							Animalia	Porifera	Demospongiae	Poecilosclerida	Esperiopsidae	Semisuberites	cribrosa		species		(Miklucho-Maclay, 1870)
	imerss.org:CHU2010:35					Jackson W.F. Chu		5						PRESENT				Stylissa stipitata		Chu JWF, Leys SP (2010) High resolution mapping of community structure in three glass sponge reefs (Porifera, Hexactinellida). Marine Ecology Progress Series 417: 97‑113. https://doi.org/10.7939/r36k3q			iNaturalist:194571								Semisuberites cribrosa							Animalia	Porifera	Demospongiae	Poecilosclerida	Esperiopsidae	Semisuberites	cribrosa		species		(Miklucho-Maclay, 1870)
	imerss.org:CHU2010:36					Jackson W.F. Chu		9						PRESENT				Stylissa stipitata		Chu JWF, Leys SP (2010) High resolution mapping of community structure in three glass sponge reefs (Porifera, Hexactinellida). Marine Ecology Progress Series 417: 97‑113. https://doi.org/10.7939/r36k3q			iNaturalist:194571								Semisuberites cribrosa							Animalia	Porifera	Demospongiae	Poecilosclerida	Esperiopsidae	Semisuberites	cribrosa		species		(Miklucho-Maclay, 1870)
	imerss.org:CHU2010:37					Jackson W.F. Chu		8						PRESENT				Stylissa stipitata		Chu JWF, Leys SP (2010) High resolution mapping of community structure in three glass sponge reefs (Porifera, Hexactinellida). Marine Ecology Progress Series 417: 97‑113. https://doi.org/10.7939/r36k3q			iNaturalist:194571								Semisuberites cribrosa							Animalia	Porifera	Demospongiae	Poecilosclerida	Esperiopsidae	Semisuberites	cribrosa		species		(Miklucho-Maclay, 1870)
	imerss.org:CHU2010:38					Jackson W.F. Chu		4						PRESENT				Stylissa stipitata		Chu JWF, Leys SP (2010) High resolution mapping of community structure in three glass sponge reefs (Porifera, Hexactinellida). Marine Ecology Progress Series 417: 97‑113. https://doi.org/10.7939/r36k3q			iNaturalist:194571								Semisuberites cribrosa							Animalia	Porifera	Demospongiae	Poecilosclerida	Esperiopsidae	Semisuberites	cribrosa		species		(Miklucho-Maclay, 1870)
	imerss.org:CHU2010:39					Jackson W.F. Chu		1						PRESENT				Stylissa stipitata		Chu JWF, Leys SP (2010) High resolution mapping of community structure in three glass sponge reefs (Porifera, Hexactinellida). Marine Ecology Progress Series 417: 97‑113. https://doi.org/10.7939/r36k3q			iNaturalist:194571								Semisuberites cribrosa							Animalia	Porifera	Demospongiae	Poecilosclerida	Esperiopsidae	Semisuberites	cribrosa		species		(Miklucho-Maclay, 1870)
	imerss.org:CHU2010:40					Jackson W.F. Chu		1						PRESENT				Stylissa stipitata		Chu JWF, Leys SP (2010) High resolution mapping of community structure in three glass sponge reefs (Porifera, Hexactinellida). Marine Ecology Progress Series 417: 97‑113. https://doi.org/10.7939/r36k3q			iNaturalist:194571								Semisuberites cribrosa							Animalia	Porifera	Demospongiae	Poecilosclerida	Esperiopsidae	Semisuberites	cribrosa		species		(Miklucho-Maclay, 1870)
	imerss.org:CHU2010:41					Jackson W.F. Chu		5						PRESENT				Stylissa stipitata		Chu JWF, Leys SP (2010) High resolution mapping of community structure in three glass sponge reefs (Porifera, Hexactinellida). Marine Ecology Progress Series 417: 97‑113. https://doi.org/10.7939/r36k3q			iNaturalist:194571								Semisuberites cribrosa							Animalia	Porifera	Demospongiae	Poecilosclerida	Esperiopsidae	Semisuberites	cribrosa		species		(Miklucho-Maclay, 1870)
	imerss.org:CHU2010:42					Jackson W.F. Chu		2						PRESENT				Stylissa stipitata		Chu JWF, Leys SP (2010) High resolution mapping of community structure in three glass sponge reefs (Porifera, Hexactinellida). Marine Ecology Progress Series 417: 97‑113. https://doi.org/10.7939/r36k3q			iNaturalist:194571								Semisuberites cribrosa							Animalia	Porifera	Demospongiae	Poecilosclerida	Esperiopsidae	Semisuberites	cribrosa		species		(Miklucho-Maclay, 1870)
	imerss.org:CHU2010:48					Jackson W.F. Chu		1						PRESENT				Stylissa stipitata		Chu JWF, Leys SP (2010) High resolution mapping of community structure in three glass sponge reefs (Porifera, Hexactinellida). Marine Ecology Progress Series 417: 97‑113. https://doi.org/10.7939/r36k3q			iNaturalist:194571								Semisuberites cribrosa							Animalia	Porifera	Demospongiae	Poecilosclerida	Esperiopsidae	Semisuberites	cribrosa		species		(Miklucho-Maclay, 1870)
	imerss.org:CHU2010:50					Jackson W.F. Chu		2						PRESENT				Stylissa stipitata		Chu JWF, Leys SP (2010) High resolution mapping of community structure in three glass sponge reefs (Porifera, Hexactinellida). Marine Ecology Progress Series 417: 97‑113. https://doi.org/10.7939/r36k3q			iNaturalist:194571								Semisuberites cribrosa							Animalia	Porifera	Demospongiae	Poecilosclerida	Esperiopsidae	Semisuberites	cribrosa		species		(Miklucho-Maclay, 1870)
	imerss.org:CHU2010:52					Jackson W.F. Chu		2						PRESENT				Stylissa stipitata		Chu JWF, Leys SP (2010) High resolution mapping of community structure in three glass sponge reefs (Porifera, Hexactinellida). Marine Ecology Progress Series 417: 97‑113. https://doi.org/10.7939/r36k3q			iNaturalist:194571								Semisuberites cribrosa							Animalia	Porifera	Demospongiae	Poecilosclerida	Esperiopsidae	Semisuberites	cribrosa		species		(Miklucho-Maclay, 1870)
	imerss.org:CHU2010:54					Jackson W.F. Chu		1						PRESENT				Stylissa stipitata		Chu JWF, Leys SP (2010) High resolution mapping of community structure in three glass sponge reefs (Porifera, Hexactinellida). Marine Ecology Progress Series 417: 97‑113. https://doi.org/10.7939/r36k3q			iNaturalist:194571								Semisuberites cribrosa							Animalia	Porifera	Demospongiae	Poecilosclerida	Esperiopsidae	Semisuberites	cribrosa		species		(Miklucho-Maclay, 1870)
	imerss.org:CHU2010:57					Jackson W.F. Chu		1						PRESENT				Stylissa stipitata		Chu JWF, Leys SP (2010) High resolution mapping of community structure in three glass sponge reefs (Porifera, Hexactinellida). Marine Ecology Progress Series 417: 97‑113. https://doi.org/10.7939/r36k3q			iNaturalist:194571								Semisuberites cribrosa							Animalia	Porifera	Demospongiae	Poecilosclerida	Esperiopsidae	Semisuberites	cribrosa		species		(Miklucho-Maclay, 1870)
	imerss.org:CHU2010:58					Jackson W.F. Chu		1						PRESENT				Stylissa stipitata		Chu JWF, Leys SP (2010) High resolution mapping of community structure in three glass sponge reefs (Porifera, Hexactinellida). Marine Ecology Progress Series 417: 97‑113. https://doi.org/10.7939/r36k3q			iNaturalist:194571								Semisuberites cribrosa							Animalia	Porifera	Demospongiae	Poecilosclerida	Esperiopsidae	Semisuberites	cribrosa		species		(Miklucho-Maclay, 1870)
	imerss.org:CHU2010:59					Jackson W.F. Chu		1						PRESENT				Stylissa stipitata		Chu JWF, Leys SP (2010) High resolution mapping of community structure in three glass sponge reefs (Porifera, Hexactinellida). Marine Ecology Progress Series 417: 97‑113. https://doi.org/10.7939/r36k3q			iNaturalist:194571								Semisuberites cribrosa							Animalia	Porifera	Demospongiae	Poecilosclerida	Esperiopsidae	Semisuberites	cribrosa		species		(Miklucho-Maclay, 1870)
	imerss.org:CHU2010:60					Jackson W.F. Chu		3						PRESENT				Stylissa stipitata		Chu JWF, Leys SP (2010) High resolution mapping of community structure in three glass sponge reefs (Porifera, Hexactinellida). Marine Ecology Progress Series 417: 97‑113. https://doi.org/10.7939/r36k3q			iNaturalist:194571								Semisuberites cribrosa							Animalia	Porifera	Demospongiae	Poecilosclerida	Esperiopsidae	Semisuberites	cribrosa		species		(Miklucho-Maclay, 1870)
	imerss.org:CHU2010:61					Jackson W.F. Chu		1						PRESENT				Stylissa stipitata		Chu JWF, Leys SP (2010) High resolution mapping of community structure in three glass sponge reefs (Porifera, Hexactinellida). Marine Ecology Progress Series 417: 97‑113. https://doi.org/10.7939/r36k3q			iNaturalist:194571								Semisuberites cribrosa							Animalia	Porifera	Demospongiae	Poecilosclerida	Esperiopsidae	Semisuberites	cribrosa		species		(Miklucho-Maclay, 1870)
	imerss.org:CHU2010:68					Jackson W.F. Chu		4						PRESENT				Stylissa stipitata		Chu JWF, Leys SP (2010) High resolution mapping of community structure in three glass sponge reefs (Porifera, Hexactinellida). Marine Ecology Progress Series 417: 97‑113. https://doi.org/10.7939/r36k3q			iNaturalist:194571								Semisuberites cribrosa							Animalia	Porifera	Demospongiae	Poecilosclerida	Esperiopsidae	Semisuberites	cribrosa		species		(Miklucho-Maclay, 1870)
	imerss.org:CHU2010:69					Jackson W.F. Chu		1						PRESENT				Stylissa stipitata		Chu JWF, Leys SP (2010) High resolution mapping of community structure in three glass sponge reefs (Porifera, Hexactinellida). Marine Ecology Progress Series 417: 97‑113. https://doi.org/10.7939/r36k3q			iNaturalist:194571								Semisuberites cribrosa							Animalia	Porifera	Demospongiae	Poecilosclerida	Esperiopsidae	Semisuberites	cribrosa		species		(Miklucho-Maclay, 1870)
	imerss.org:CHU2010:70					Jackson W.F. Chu		1						PRESENT				Stylissa stipitata		Chu JWF, Leys SP (2010) High resolution mapping of community structure in three glass sponge reefs (Porifera, Hexactinellida). Marine Ecology Progress Series 417: 97‑113. https://doi.org/10.7939/r36k3q			iNaturalist:194571								Semisuberites cribrosa							Animalia	Porifera	Demospongiae	Poecilosclerida	Esperiopsidae	Semisuberites	cribrosa		species		(Miklucho-Maclay, 1870)
	imerss.org:CHU2010:71					Jackson W.F. Chu		1						PRESENT				Stylissa stipitata		Chu JWF, Leys SP (2010) High resolution mapping of community structure in three glass sponge reefs (Porifera, Hexactinellida). Marine Ecology Progress Series 417: 97‑113. https://doi.org/10.7939/r36k3q			iNaturalist:194571								Semisuberites cribrosa							Animalia	Porifera	Demospongiae	Poecilosclerida	Esperiopsidae	Semisuberites	cribrosa		species		(Miklucho-Maclay, 1870)
	imerss.org:CHU2010:72					Jackson W.F. Chu		1						PRESENT				Stylissa stipitata		Chu JWF, Leys SP (2010) High resolution mapping of community structure in three glass sponge reefs (Porifera, Hexactinellida). Marine Ecology Progress Series 417: 97‑113. https://doi.org/10.7939/r36k3q			iNaturalist:194571								Semisuberites cribrosa							Animalia	Porifera	Demospongiae	Poecilosclerida	Esperiopsidae	Semisuberites	cribrosa		species		(Miklucho-Maclay, 1870)
	imerss.org:CHU2010:89					Jackson W.F. Chu		1						PRESENT				Stylissa stipitata		Chu JWF, Leys SP (2010) High resolution mapping of community structure in three glass sponge reefs (Porifera, Hexactinellida). Marine Ecology Progress Series 417: 97‑113. https://doi.org/10.7939/r36k3q			iNaturalist:194571								Semisuberites cribrosa							Animalia	Porifera	Demospongiae	Poecilosclerida	Esperiopsidae	Semisuberites	cribrosa		species		(Miklucho-Maclay, 1870)
	imerss.org:CHU2010:105					Jackson W.F. Chu		1						PRESENT				Stylissa stipitata		Chu JWF, Leys SP (2010) High resolution mapping of community structure in three glass sponge reefs (Porifera, Hexactinellida). Marine Ecology Progress Series 417: 97‑113. https://doi.org/10.7939/r36k3q			iNaturalist:194571								Semisuberites cribrosa							Animalia	Porifera	Demospongiae	Poecilosclerida	Esperiopsidae	Semisuberites	cribrosa		species		(Miklucho-Maclay, 1870)
	imerss.org:CHU2010:826					Jackson W.F. Chu		1						PRESENT				Iophon		Chu JWF, Leys SP (2010) High resolution mapping of community structure in three glass sponge reefs (Porifera, Hexactinellida). Marine Ecology Progress Series 417: 97‑113. https://doi.org/10.7939/r36k3q			iNaturalist:196359								Iophon							Animalia	Porifera	Demospongiae	Poecilosclerida	Acarnidae	Iophon			genus
	imerss.org:CHU2010:835					Jackson W.F. Chu		2						PRESENT				Iophon		Chu JWF, Leys SP (2010) High resolution mapping of community structure in three glass sponge reefs (Porifera, Hexactinellida). Marine Ecology Progress Series 417: 97‑113. https://doi.org/10.7939/r36k3q			iNaturalist:196359								Iophon							Animalia	Porifera	Demospongiae	Poecilosclerida	Acarnidae	Iophon			genus
	imerss.org:CHU2010:839					Jackson W.F. Chu		1						PRESENT				Iophon		Chu JWF, Leys SP (2010) High resolution mapping of community structure in three glass sponge reefs (Porifera, Hexactinellida). Marine Ecology Progress Series 417: 97‑113. https://doi.org/10.7939/r36k3q			iNaturalist:196359								Iophon							Animalia	Porifera	Demospongiae	Poecilosclerida	Acarnidae	Iophon			genus
	imerss.org:CHU2010:899					Jackson W.F. Chu		3						PRESENT				Iophon		Chu JWF, Leys SP (2010) High resolution mapping of community structure in three glass sponge reefs (Porifera, Hexactinellida). Marine Ecology Progress Series 417: 97‑113. https://doi.org/10.7939/r36k3q			iNaturalist:196359								Iophon							Animalia	Porifera	Demospongiae	Poecilosclerida	Acarnidae	Iophon			genus
	imerss.org:CHU2010:901					Jackson W.F. Chu		4						PRESENT				Iophon		Chu JWF, Leys SP (2010) High resolution mapping of community structure in three glass sponge reefs (Porifera, Hexactinellida). Marine Ecology Progress Series 417: 97‑113. https://doi.org/10.7939/r36k3q			iNaturalist:196359								Iophon							Animalia	Porifera	Demospongiae	Poecilosclerida	Acarnidae	Iophon			genus
	imerss.org:CHU2010:903					Jackson W.F. Chu		2						PRESENT				Iophon		Chu JWF, Leys SP (2010) High resolution mapping of community structure in three glass sponge reefs (Porifera, Hexactinellida). Marine Ecology Progress Series 417: 97‑113. https://doi.org/10.7939/r36k3q			iNaturalist:196359								Iophon							Animalia	Porifera	Demospongiae	Poecilosclerida	Acarnidae	Iophon			genus
	imerss.org:CHU2010:1077					Jackson W.F. Chu		1						PRESENT				Tetilla		Chu JWF, Leys SP (2010) High resolution mapping of community structure in three glass sponge reefs (Porifera, Hexactinellida). Marine Ecology Progress Series 417: 97‑113. https://doi.org/10.7939/r36k3q			iNaturalist:247194								Tetilla							Animalia	Porifera	Demospongiae	Tetractinellida	Tetillidae	Tetilla			genus
	imerss.org:CHU2010:1081					Jackson W.F. Chu		2						PRESENT				Tetilla		Chu JWF, Leys SP (2010) High resolution mapping of community structure in three glass sponge reefs (Porifera, Hexactinellida). Marine Ecology Progress Series 417: 97‑113. https://doi.org/10.7939/r36k3q			iNaturalist:247194								Tetilla							Animalia	Porifera	Demospongiae	Tetractinellida	Tetillidae	Tetilla			genus
	imerss.org:CHU2010:1084					Jackson W.F. Chu		1						PRESENT				Tetilla		Chu JWF, Leys SP (2010) High resolution mapping of community structure in three glass sponge reefs (Porifera, Hexactinellida). Marine Ecology Progress Series 417: 97‑113. https://doi.org/10.7939/r36k3q			iNaturalist:247194								Tetilla							Animalia	Porifera	Demospongiae	Tetractinellida	Tetillidae	Tetilla			genus
	imerss.org:CHU2010:1096					Jackson W.F. Chu		7						PRESENT				Tetilla		Chu JWF, Leys SP (2010) High resolution mapping of community structure in three glass sponge reefs (Porifera, Hexactinellida). Marine Ecology Progress Series 417: 97‑113. https://doi.org/10.7939/r36k3q			iNaturalist:247194								Tetilla							Animalia	Porifera	Demospongiae	Tetractinellida	Tetillidae	Tetilla			genus
	imerss.org:CHU2010:1099					Jackson W.F. Chu		1						PRESENT				Tetilla		Chu JWF, Leys SP (2010) High resolution mapping of community structure in three glass sponge reefs (Porifera, Hexactinellida). Marine Ecology Progress Series 417: 97‑113. https://doi.org/10.7939/r36k3q			iNaturalist:247194								Tetilla							Animalia	Porifera	Demospongiae	Tetractinellida	Tetillidae	Tetilla			genus
	imerss.org:CHU2010:1163					Jackson W.F. Chu		1						PRESENT				Tetilla		Chu JWF, Leys SP (2010) High resolution mapping of community structure in three glass sponge reefs (Porifera, Hexactinellida). Marine Ecology Progress Series 417: 97‑113. https://doi.org/10.7939/r36k3q			iNaturalist:247194								Tetilla							Animalia	Porifera	Demospongiae	Tetractinellida	Tetillidae	Tetilla			genus
	imerss.org:CHU2010:1164					Jackson W.F. Chu		1						PRESENT				Tetilla		Chu JWF, Leys SP (2010) High resolution mapping of community structure in three glass sponge reefs (Porifera, Hexactinellida). Marine Ecology Progress Series 417: 97‑113. https://doi.org/10.7939/r36k3q			iNaturalist:247194								Tetilla							Animalia	Porifera	Demospongiae	Tetractinellida	Tetillidae	Tetilla			genus
	imerss.org:CHU2010:1216					Jackson W.F. Chu		1						PRESENT				Tetilla		Chu JWF, Leys SP (2010) High resolution mapping of community structure in three glass sponge reefs (Porifera, Hexactinellida). Marine Ecology Progress Series 417: 97‑113. https://doi.org/10.7939/r36k3q			iNaturalist:247194								Tetilla							Animalia	Porifera	Demospongiae	Tetractinellida	Tetillidae	Tetilla			genus
	imerss.org:CHU2010:1379					Jackson W.F. Chu		2						PRESENT				Tetilla		Chu JWF, Leys SP (2010) High resolution mapping of community structure in three glass sponge reefs (Porifera, Hexactinellida). Marine Ecology Progress Series 417: 97‑113. https://doi.org/10.7939/r36k3q			iNaturalist:247194								Tetilla							Animalia	Porifera	Demospongiae	Tetractinellida	Tetillidae	Tetilla			genus
	imerss.org:CHU2010:1587					Jackson W.F. Chu		2						PRESENT				Tetilla		Chu JWF, Leys SP (2010) High resolution mapping of community structure in three glass sponge reefs (Porifera, Hexactinellida). Marine Ecology Progress Series 417: 97‑113. https://doi.org/10.7939/r36k3q			iNaturalist:247194								Tetilla							Animalia	Porifera	Demospongiae	Tetractinellida	Tetillidae	Tetilla			genus
	imerss.org:CHU2010:1624					Jackson W.F. Chu		2						PRESENT				Rhabdocalyptus dawsoni		Chu JWF, Leys SP (2010) High resolution mapping of community structure in three glass sponge reefs (Porifera, Hexactinellida). Marine Ecology Progress Series 417: 97‑113. https://doi.org/10.7939/r36k3q			iNaturalist:751673								Rhabdocalyptus dawsoni							Animalia	Porifera	Hexactinellida	Lyssacinosida	Rossellidae	Rhabdocalyptus	dawsoni		species		(Lambe, 1893)
	imerss.org:CHU2010:1631					Jackson W.F. Chu		1						PRESENT				Rhabdocalyptus dawsoni		Chu JWF, Leys SP (2010) High resolution mapping of community structure in three glass sponge reefs (Porifera, Hexactinellida). Marine Ecology Progress Series 417: 97‑113. https://doi.org/10.7939/r36k3q			iNaturalist:751673								Rhabdocalyptus dawsoni							Animalia	Porifera	Hexactinellida	Lyssacinosida	Rossellidae	Rhabdocalyptus	dawsoni		species		(Lambe, 1893)
	imerss.org:CHU2010:1632					Jackson W.F. Chu		1						PRESENT				Rhabdocalyptus dawsoni		Chu JWF, Leys SP (2010) High resolution mapping of community structure in three glass sponge reefs (Porifera, Hexactinellida). Marine Ecology Progress Series 417: 97‑113. https://doi.org/10.7939/r36k3q			iNaturalist:751673								Rhabdocalyptus dawsoni							Animalia	Porifera	Hexactinellida	Lyssacinosida	Rossellidae	Rhabdocalyptus	dawsoni		species		(Lambe, 1893)
	imerss.org:CHU2010:1637					Jackson W.F. Chu		1						PRESENT				Rhabdocalyptus dawsoni		Chu JWF, Leys SP (2010) High resolution mapping of community structure in three glass sponge reefs (Porifera, Hexactinellida). Marine Ecology Progress Series 417: 97‑113. https://doi.org/10.7939/r36k3q			iNaturalist:751673								Rhabdocalyptus dawsoni							Animalia	Porifera	Hexactinellida	Lyssacinosida	Rossellidae	Rhabdocalyptus	dawsoni		species		(Lambe, 1893)
	imerss.org:CHU2010:1654					Jackson W.F. Chu		2						PRESENT				Rhabdocalyptus dawsoni		Chu JWF, Leys SP (2010) High resolution mapping of community structure in three glass sponge reefs (Porifera, Hexactinellida). Marine Ecology Progress Series 417: 97‑113. https://doi.org/10.7939/r36k3q			iNaturalist:751673								Rhabdocalyptus dawsoni							Animalia	Porifera	Hexactinellida	Lyssacinosida	Rossellidae	Rhabdocalyptus	dawsoni		species		(Lambe, 1893)
	imerss.org:CHU2010:1674					Jackson W.F. Chu		1						PRESENT				Rhabdocalyptus dawsoni		Chu JWF, Leys SP (2010) High resolution mapping of community structure in three glass sponge reefs (Porifera, Hexactinellida). Marine Ecology Progress Series 417: 97‑113. https://doi.org/10.7939/r36k3q			iNaturalist:751673								Rhabdocalyptus dawsoni							Animalia	Porifera	Hexactinellida	Lyssacinosida	Rossellidae	Rhabdocalyptus	dawsoni		species		(Lambe, 1893)
	imerss.org:CHU2010:1680					Jackson W.F. Chu		2						PRESENT				Rhabdocalyptus dawsoni		Chu JWF, Leys SP (2010) High resolution mapping of community structure in three glass sponge reefs (Porifera, Hexactinellida). Marine Ecology Progress Series 417: 97‑113. https://doi.org/10.7939/r36k3q			iNaturalist:751673								Rhabdocalyptus dawsoni							Animalia	Porifera	Hexactinellida	Lyssacinosida	Rossellidae	Rhabdocalyptus	dawsoni		species		(Lambe, 1893)
	imerss.org:CHU2010:1681					Jackson W.F. Chu		1						PRESENT				Rhabdocalyptus dawsoni		Chu JWF, Leys SP (2010) High resolution mapping of community structure in three glass sponge reefs (Porifera, Hexactinellida). Marine Ecology Progress Series 417: 97‑113. https://doi.org/10.7939/r36k3q			iNaturalist:751673								Rhabdocalyptus dawsoni							Animalia	Porifera	Hexactinellida	Lyssacinosida	Rossellidae	Rhabdocalyptus	dawsoni		species		(Lambe, 1893)
	imerss.org:CHU2010:1682					Jackson W.F. Chu		1						PRESENT				Rhabdocalyptus dawsoni		Chu JWF, Leys SP (2010) High resolution mapping of community structure in three glass sponge reefs (Porifera, Hexactinellida). Marine Ecology Progress Series 417: 97‑113. https://doi.org/10.7939/r36k3q			iNaturalist:751673								Rhabdocalyptus dawsoni							Animalia	Porifera	Hexactinellida	Lyssacinosida	Rossellidae	Rhabdocalyptus	dawsoni		species		(Lambe, 1893)
	imerss.org:CHU2010:1683					Jackson W.F. Chu		1						PRESENT				Rhabdocalyptus dawsoni		Chu JWF, Leys SP (2010) High resolution mapping of community structure in three glass sponge reefs (Porifera, Hexactinellida). Marine Ecology Progress Series 417: 97‑113. https://doi.org/10.7939/r36k3q			iNaturalist:751673								Rhabdocalyptus dawsoni							Animalia	Porifera	Hexactinellida	Lyssacinosida	Rossellidae	Rhabdocalyptus	dawsoni		species		(Lambe, 1893)
	imerss.org:CHU2010:1684					Jackson W.F. Chu		1						PRESENT				Rhabdocalyptus dawsoni		Chu JWF, Leys SP (2010) High resolution mapping of community structure in three glass sponge reefs (Porifera, Hexactinellida). Marine Ecology Progress Series 417: 97‑113. https://doi.org/10.7939/r36k3q			iNaturalist:751673								Rhabdocalyptus dawsoni							Animalia	Porifera	Hexactinellida	Lyssacinosida	Rossellidae	Rhabdocalyptus	dawsoni		species		(Lambe, 1893)
	imerss.org:CHU2010:1737					Jackson W.F. Chu		1						PRESENT				Rhabdocalyptus dawsoni		Chu JWF, Leys SP (2010) High resolution mapping of community structure in three glass sponge reefs (Porifera, Hexactinellida). Marine Ecology Progress Series 417: 97‑113. https://doi.org/10.7939/r36k3q			iNaturalist:751673								Rhabdocalyptus dawsoni							Animalia	Porifera	Hexactinellida	Lyssacinosida	Rossellidae	Rhabdocalyptus	dawsoni		species		(Lambe, 1893)
	imerss.org:CHU2010:1740					Jackson W.F. Chu		1						PRESENT				Rhabdocalyptus dawsoni		Chu JWF, Leys SP (2010) High resolution mapping of community structure in three glass sponge reefs (Porifera, Hexactinellida). Marine Ecology Progress Series 417: 97‑113. https://doi.org/10.7939/r36k3q			iNaturalist:751673								Rhabdocalyptus dawsoni							Animalia	Porifera	Hexactinellida	Lyssacinosida	Rossellidae	Rhabdocalyptus	dawsoni		species		(Lambe, 1893)
	imerss.org:CHU2010:1938					Jackson W.F. Chu		1						PRESENT				Rhabdocalyptus dawsoni		Chu JWF, Leys SP (2010) High resolution mapping of community structure in three glass sponge reefs (Porifera, Hexactinellida). Marine Ecology Progress Series 417: 97‑113. https://doi.org/10.7939/r36k3q			iNaturalist:751673								Rhabdocalyptus dawsoni							Animalia	Porifera	Hexactinellida	Lyssacinosida	Rossellidae	Rhabdocalyptus	dawsoni		species		(Lambe, 1893)
	imerss.org:CHU2010:1946					Jackson W.F. Chu		2						PRESENT				Rhabdocalyptus dawsoni		Chu JWF, Leys SP (2010) High resolution mapping of community structure in three glass sponge reefs (Porifera, Hexactinellida). Marine Ecology Progress Series 417: 97‑113. https://doi.org/10.7939/r36k3q			iNaturalist:751673								Rhabdocalyptus dawsoni							Animalia	Porifera	Hexactinellida	Lyssacinosida	Rossellidae	Rhabdocalyptus	dawsoni		species		(Lambe, 1893)
	imerss.org:CHU2010:1947					Jackson W.F. Chu		1						PRESENT				Rhabdocalyptus dawsoni		Chu JWF, Leys SP (2010) High resolution mapping of community structure in three glass sponge reefs (Porifera, Hexactinellida). Marine Ecology Progress Series 417: 97‑113. https://doi.org/10.7939/r36k3q			iNaturalist:751673								Rhabdocalyptus dawsoni							Animalia	Porifera	Hexactinellida	Lyssacinosida	Rossellidae	Rhabdocalyptus	dawsoni		species		(Lambe, 1893)
	imerss.org:CHU2010:1950					Jackson W.F. Chu		3						PRESENT				Rhabdocalyptus dawsoni		Chu JWF, Leys SP (2010) High resolution mapping of community structure in three glass sponge reefs (Porifera, Hexactinellida). Marine Ecology Progress Series 417: 97‑113. https://doi.org/10.7939/r36k3q			iNaturalist:751673								Rhabdocalyptus dawsoni							Animalia	Porifera	Hexactinellida	Lyssacinosida	Rossellidae	Rhabdocalyptus	dawsoni		species		(Lambe, 1893)
	imerss.org:CHU2010:1954					Jackson W.F. Chu		1						PRESENT				Rhabdocalyptus dawsoni		Chu JWF, Leys SP (2010) High resolution mapping of community structure in three glass sponge reefs (Porifera, Hexactinellida). Marine Ecology Progress Series 417: 97‑113. https://doi.org/10.7939/r36k3q			iNaturalist:751673								Rhabdocalyptus dawsoni							Animalia	Porifera	Hexactinellida	Lyssacinosida	Rossellidae	Rhabdocalyptus	dawsoni		species		(Lambe, 1893)
	imerss.org:CHU2010:1957					Jackson W.F. Chu		1						PRESENT				Rhabdocalyptus dawsoni		Chu JWF, Leys SP (2010) High resolution mapping of community structure in three glass sponge reefs (Porifera, Hexactinellida). Marine Ecology Progress Series 417: 97‑113. https://doi.org/10.7939/r36k3q			iNaturalist:751673								Rhabdocalyptus dawsoni							Animalia	Porifera	Hexactinellida	Lyssacinosida	Rossellidae	Rhabdocalyptus	dawsoni		species		(Lambe, 1893)
	imerss.org:CHU2010:1959					Jackson W.F. Chu		1						PRESENT				Rhabdocalyptus dawsoni		Chu JWF, Leys SP (2010) High resolution mapping of community structure in three glass sponge reefs (Porifera, Hexactinellida). Marine Ecology Progress Series 417: 97‑113. https://doi.org/10.7939/r36k3q			iNaturalist:751673								Rhabdocalyptus dawsoni							Animalia	Porifera	Hexactinellida	Lyssacinosida	Rossellidae	Rhabdocalyptus	dawsoni		species		(Lambe, 1893)
	imerss.org:CHU2010:1986					Jackson W.F. Chu		1						PRESENT				Rhabdocalyptus dawsoni		Chu JWF, Leys SP (2010) High resolution mapping of community structure in three glass sponge reefs (Porifera, Hexactinellida). Marine Ecology Progress Series 417: 97‑113. https://doi.org/10.7939/r36k3q			iNaturalist:751673								Rhabdocalyptus dawsoni							Animalia	Porifera	Hexactinellida	Lyssacinosida	Rossellidae	Rhabdocalyptus	dawsoni		species		(Lambe, 1893)
	imerss.org:CHU2010:1988					Jackson W.F. Chu		1						PRESENT				Rhabdocalyptus dawsoni		Chu JWF, Leys SP (2010) High resolution mapping of community structure in three glass sponge reefs (Porifera, Hexactinellida). Marine Ecology Progress Series 417: 97‑113. https://doi.org/10.7939/r36k3q			iNaturalist:751673								Rhabdocalyptus dawsoni							Animalia	Porifera	Hexactinellida	Lyssacinosida	Rossellidae	Rhabdocalyptus	dawsoni		species		(Lambe, 1893)
	imerss.org:CHU2010:1989					Jackson W.F. Chu		1						PRESENT				Rhabdocalyptus dawsoni		Chu JWF, Leys SP (2010) High resolution mapping of community structure in three glass sponge reefs (Porifera, Hexactinellida). Marine Ecology Progress Series 417: 97‑113. https://doi.org/10.7939/r36k3q			iNaturalist:751673								Rhabdocalyptus dawsoni							Animalia	Porifera	Hexactinellida	Lyssacinosida	Rossellidae	Rhabdocalyptus	dawsoni		species		(Lambe, 1893)
	imerss.org:CHU2010:1992					Jackson W.F. Chu		1						PRESENT				Rhabdocalyptus dawsoni		Chu JWF, Leys SP (2010) High resolution mapping of community structure in three glass sponge reefs (Porifera, Hexactinellida). Marine Ecology Progress Series 417: 97‑113. https://doi.org/10.7939/r36k3q			iNaturalist:751673								Rhabdocalyptus dawsoni							Animalia	Porifera	Hexactinellida	Lyssacinosida	Rossellidae	Rhabdocalyptus	dawsoni		species		(Lambe, 1893)
	imerss.org:CHU2010:1996					Jackson W.F. Chu		1						PRESENT				Rhabdocalyptus dawsoni		Chu JWF, Leys SP (2010) High resolution mapping of community structure in three glass sponge reefs (Porifera, Hexactinellida). Marine Ecology Progress Series 417: 97‑113. https://doi.org/10.7939/r36k3q			iNaturalist:751673								Rhabdocalyptus dawsoni							Animalia	Porifera	Hexactinellida	Lyssacinosida	Rossellidae	Rhabdocalyptus	dawsoni		species		(Lambe, 1893)
	imerss.org:CHU2010:2132					Jackson W.F. Chu		1						PRESENT				Rhabdocalyptus dawsoni		Chu JWF, Leys SP (2010) High resolution mapping of community structure in three glass sponge reefs (Porifera, Hexactinellida). Marine Ecology Progress Series 417: 97‑113. https://doi.org/10.7939/r36k3q			iNaturalist:751673								Rhabdocalyptus dawsoni							Animalia	Porifera	Hexactinellida	Lyssacinosida	Rossellidae	Rhabdocalyptus	dawsoni		species		(Lambe, 1893)
[truncated: 106 more columns]

## Sheet: ExternalLinks
Taxon_Local_ID	Link type	Link
