# Supplementary material for: Toward an atlas of Salish Sea biodiversity: the flora and fauna of Galiano Island, British Columbia, Canada. Part I. Marine zoology
Source: Biodivers Data J. 2022 Mar 10;10:e76050. doi: 10.3897/BDJ.10.e76050 (PMC8930920; doi:10.3897/BDJ.10.e76050)
Supplement: Supplementary material 4 — Ctenophora of Galiano Island, British Columbia, Canada [file bdj-10-e76050-s004.xlsx]

## Sheet: Taxa
Taxon_Local_ID	Kingdom	Subkingdom	Phylum	Subphylum	Superclass	Class	Subclass	Superorder	Order	Suborder	Infraorder	Superfamily	Family	Subfamily	Tribe	Subtribe	Genus	Subgenus	Species	Subspecies	Variety	Form	Authorship	Nomenclature	Feeds on	symbioticWith	parasiteOf	Host of	Native Status	Conservation Status	Distribution	Horizon	Notes
1090851	Animalia		Ctenophora			Nuda			Beroida				Beroidae				Beroe		abyssicola				Mortensen, 1927
873875	Animalia		Ctenophora			Tentaculata			Cydippida				Euplokamididae				Euplokamis		dunlapae				Mills, 1987
117705	Animalia		Ctenophora			Tentaculata			Cydippida				Pleurobrachiidae				Pleurobrachia		bachei				A. Agassiz, 1860
492705	Animalia		Ctenophora			Tentaculata			Lobata				Bolinopsidae				Bolinopsis		infundibulum				(O.F. Müller, 1776)

## Sheet: Materials
typeStatus	occurrenceID	catalogNumber	occurrenceDetails	occurrenceRemarks	recordNumber	recordedBy	individualID	individualCount	sex	lifeStage	reproductiveCondition	behavior	establishmentMeans	occurrenceStatus	preparations	disposition	otherCatalogNumbers	previousIdentifications	associatedMedia	associatedReferences	associatedOccurrences	associatedSequences	taxonID	scientificNameID	acceptedNameUsageID	parentNameUsageID	originalNameUsageID	nameAccordingToID	namePublishedInID	taxonConceptID	scientificName	acceptedNameUsage	parentNameUsage	originalNameUsage	nameAccordingTo	namePublishedIn	higherClassification	kingdom	phylum	class	order	family	genus	specificEpithet	infraspecificEpithet	taxonRank	verbatimTaxonRank	scientificNameAuthorship	vernacularName
	imerss.org:PMLS:240					Andy Lamb								PRESENT				Pleurobrachia bachei					iNaturalist:117705								Pleurobrachia bachei							Animalia	Ctenophora	Tentaculata	Cydippida	Pleurobrachiidae	Pleurobrachia	bachei		species		A. Agassiz, 1860
	imerss.org:PMLS:294					Andy Lamb								PRESENT				Pleurobrachia bachei					iNaturalist:117705								Pleurobrachia bachei							Animalia	Ctenophora	Tentaculata	Cydippida	Pleurobrachiidae	Pleurobrachia	bachei		species		A. Agassiz, 1860
	imerss.org:PMLS:630					Charlie Gibbs								PRESENT				Beroe abyssicola					iNaturalist:1090851								Beroe abyssicola							Animalia	Ctenophora	Nuda	Beroida	Beroidae	Beroe	abyssicola		species		Mortensen, 1927
	imerss.org:PMLS:1574					Charlie Gibbs								PRESENT				Pleurobrachia bachei					iNaturalist:117705								Pleurobrachia bachei							Animalia	Ctenophora	Tentaculata	Cydippida	Pleurobrachiidae	Pleurobrachia	bachei		species		A. Agassiz, 1860
	imerss.org:PMLS:1575					Charlie Gibbs								PRESENT				Euplokamis dunlapae					iNaturalist:873875								Euplokamis dunlapae							Animalia	Ctenophora	Tentaculata	Cydippida	Euplokamididae	Euplokamis	dunlapae		species		Mills, 1987
	imerss.org:PMLS:2290					Charlie Gibbs								PRESENT				Pleurobrachia bachei					iNaturalist:117705								Pleurobrachia bachei							Animalia	Ctenophora	Tentaculata	Cydippida	Pleurobrachiidae	Pleurobrachia	bachei		species		A. Agassiz, 1860
	imerss.org:PMLS:2291			Count: many		Charlie Gibbs								PRESENT				Bolinopsis infundibulum					iNaturalist:492705								Bolinopsis infundibulum							Animalia	Ctenophora	Tentaculata	Lobata	Bolinopsidae	Bolinopsis	infundibulum		species		(O.F. Müller, 1776)
	imerss.org:PMLS:2582					Charlie Gibbs								PRESENT				Bolinopsis infundibulum					iNaturalist:492705								Bolinopsis infundibulum							Animalia	Ctenophora	Tentaculata	Lobata	Bolinopsidae	Bolinopsis	infundibulum		species		(O.F. Müller, 1776)
	imerss.org:PMLS:2790			Count: many		Andy Lamb								PRESENT				Pleurobrachia bachei					iNaturalist:117705								Pleurobrachia bachei							Animalia	Ctenophora	Tentaculata	Cydippida	Pleurobrachiidae	Pleurobrachia	bachei		species		A. Agassiz, 1860
	imerss.org:PMLS:2791			Count: some		Andy Lamb								PRESENT				Beroe abyssicola					iNaturalist:1090851								Beroe abyssicola							Animalia	Ctenophora	Nuda	Beroida	Beroidae	Beroe	abyssicola		species		Mortensen, 1927
	imerss.org:PMLS:3673			Count: few		Andy Lamb								PRESENT				Pleurobrachia bachei					iNaturalist:117705								Pleurobrachia bachei							Animalia	Ctenophora	Tentaculata	Cydippida	Pleurobrachiidae	Pleurobrachia	bachei		species		A. Agassiz, 1860
	imerss.org:PMLS:4731			Count: few		Andy Lamb								PRESENT				Pleurobrachia bachei					iNaturalist:117705								Pleurobrachia bachei							Animalia	Ctenophora	Tentaculata	Cydippida	Pleurobrachiidae	Pleurobrachia	bachei		species		A. Agassiz, 1860
	imerss.org:PMLS:6756			Count: some		Andy Lamb								PRESENT				Bolinopsis infundibulum					iNaturalist:492705								Bolinopsis infundibulum							Animalia	Ctenophora	Tentaculata	Lobata	Bolinopsidae	Bolinopsis	infundibulum		species		(O.F. Müller, 1776)
	imerss.org:PMLS:6862			Count: some		Andy Lamb								PRESENT				Bolinopsis infundibulum					iNaturalist:492705								Bolinopsis infundibulum							Animalia	Ctenophora	Tentaculata	Lobata	Bolinopsidae	Bolinopsis	infundibulum		species		(O.F. Müller, 1776)
	imerss.org:PMLS:6985			Count: few		Andy Lamb								PRESENT				Pleurobrachia bachei					iNaturalist:117705								Pleurobrachia bachei							Animalia	Ctenophora	Tentaculata	Cydippida	Pleurobrachiidae	Pleurobrachia	bachei		species		A. Agassiz, 1860
	imerss.org:PMLS:6986			Count: very abundant		Andy Lamb								PRESENT				Bolinopsis infundibulum					iNaturalist:492705								Bolinopsis infundibulum							Animalia	Ctenophora	Tentaculata	Lobata	Bolinopsidae	Bolinopsis	infundibulum		species		(O.F. Müller, 1776)
	imerss.org:PMLS:7124			Count: very many		Andy Lamb								PRESENT				Bolinopsis infundibulum					iNaturalist:492705								Bolinopsis infundibulum							Animalia	Ctenophora	Tentaculata	Lobata	Bolinopsidae	Bolinopsis	infundibulum		species		(O.F. Müller, 1776)
	imerss.org:PMLS:7217			Count: very many		Andy Lamb								PRESENT				Bolinopsis infundibulum					iNaturalist:492705								Bolinopsis infundibulum							Animalia	Ctenophora	Tentaculata	Lobata	Bolinopsidae	Bolinopsis	infundibulum		species		(O.F. Müller, 1776)
	imerss.org:PMLS:7401			Count: few		Andy Lamb								PRESENT				Bolinopsis infundibulum					iNaturalist:492705								Bolinopsis infundibulum							Animalia	Ctenophora	Tentaculata	Lobata	Bolinopsidae	Bolinopsis	infundibulum		species		(O.F. Müller, 1776)
	imerss.org:PMLS:8021			Count: some		Andy Lamb								PRESENT				Pleurobrachia bachei					iNaturalist:117705								Pleurobrachia bachei							Animalia	Ctenophora	Tentaculata	Cydippida	Pleurobrachiidae	Pleurobrachia	bachei		species		A. Agassiz, 1860
	imerss.org:PMLS:8222			Count: some		Andy Lamb								PRESENT				Pleurobrachia bachei					iNaturalist:117705								Pleurobrachia bachei							Animalia	Ctenophora	Tentaculata	Cydippida	Pleurobrachiidae	Pleurobrachia	bachei		species		A. Agassiz, 1860
	imerss.org:PMLS:8302			Count: some		Andy Lamb								PRESENT				Pleurobrachia bachei					iNaturalist:117705								Pleurobrachia bachei							Animalia	Ctenophora	Tentaculata	Cydippida	Pleurobrachiidae	Pleurobrachia	bachei		species		A. Agassiz, 1860
	imerss.org:PMLS:8669			Count: few		Andy Lamb								PRESENT				Pleurobrachia bachei					iNaturalist:117705								Pleurobrachia bachei							Animalia	Ctenophora	Tentaculata	Cydippida	Pleurobrachiidae	Pleurobrachia	bachei		species		A. Agassiz, 1860
	imerss.org:PMLS:10568			Count: some		Andy Lamb								PRESENT				Pleurobrachia bachei					iNaturalist:117705								Pleurobrachia bachei							Animalia	Ctenophora	Tentaculata	Cydippida	Pleurobrachiidae	Pleurobrachia	bachei		species		A. Agassiz, 1860
	imerss.org:PMLS:10569			Count: abundant		Andy Lamb								PRESENT				Bolinopsis infundibulum					iNaturalist:492705								Bolinopsis infundibulum							Animalia	Ctenophora	Tentaculata	Lobata	Bolinopsidae	Bolinopsis	infundibulum		species		(O.F. Müller, 1776)
	imerss.org:PMLS:10570			Count: very many		Andy Lamb								PRESENT				Beroe abyssicola					iNaturalist:1090851								Beroe abyssicola							Animalia	Ctenophora	Nuda	Beroida	Beroidae	Beroe	abyssicola		species		Mortensen, 1927
	imerss.org:PMLS:10830			Count: some		Andy Lamb								PRESENT				Pleurobrachia bachei					iNaturalist:117705								Pleurobrachia bachei							Animalia	Ctenophora	Tentaculata	Cydippida	Pleurobrachiidae	Pleurobrachia	bachei		species		A. Agassiz, 1860
	imerss.org:PMLS:10831			Count: abundant		Andy Lamb								PRESENT				Bolinopsis infundibulum					iNaturalist:492705								Bolinopsis infundibulum							Animalia	Ctenophora	Tentaculata	Lobata	Bolinopsidae	Bolinopsis	infundibulum		species		(O.F. Müller, 1776)
	imerss.org:PMLS:10832			Count: very many		Andy Lamb								PRESENT				Beroe abyssicola					iNaturalist:1090851								Beroe abyssicola							Animalia	Ctenophora	Nuda	Beroida	Beroidae	Beroe	abyssicola		species		Mortensen, 1927
	imerss.org:PMLS:10995			Count: few		Andy Lamb								PRESENT				Pleurobrachia bachei					iNaturalist:117705								Pleurobrachia bachei							Animalia	Ctenophora	Tentaculata	Cydippida	Pleurobrachiidae	Pleurobrachia	bachei		species		A. Agassiz, 1860
	imerss.org:PMLS:10996			Count: abundant		Andy Lamb								PRESENT				Bolinopsis infundibulum					iNaturalist:492705								Bolinopsis infundibulum							Animalia	Ctenophora	Tentaculata	Lobata	Bolinopsidae	Bolinopsis	infundibulum		species		(O.F. Müller, 1776)
	imerss.org:PMLS:10997			Count: very many		Andy Lamb								PRESENT				Beroe abyssicola					iNaturalist:1090851								Beroe abyssicola							Animalia	Ctenophora	Nuda	Beroida	Beroidae	Beroe	abyssicola		species		Mortensen, 1927
	imerss.org:PMLS:11114			Count: some		Andy Lamb								PRESENT				Pleurobrachia bachei					iNaturalist:117705								Pleurobrachia bachei							Animalia	Ctenophora	Tentaculata	Cydippida	Pleurobrachiidae	Pleurobrachia	bachei		species		A. Agassiz, 1860
	imerss.org:PMLS:11115			Count: many		Andy Lamb								PRESENT				Bolinopsis infundibulum					iNaturalist:492705								Bolinopsis infundibulum							Animalia	Ctenophora	Tentaculata	Lobata	Bolinopsidae	Bolinopsis	infundibulum		species		(O.F. Müller, 1776)
	imerss.org:PMLS:11197			Count: very many		Andy Lamb								PRESENT				Bolinopsis infundibulum					iNaturalist:492705								Bolinopsis infundibulum							Animalia	Ctenophora	Tentaculata	Lobata	Bolinopsidae	Bolinopsis	infundibulum		species		(O.F. Müller, 1776)
	imerss.org:PMLS:11291			Count: some		Andy Lamb								PRESENT				Pleurobrachia bachei					iNaturalist:117705								Pleurobrachia bachei							Animalia	Ctenophora	Tentaculata	Cydippida	Pleurobrachiidae	Pleurobrachia	bachei		species		A. Agassiz, 1860
	imerss.org:PMLS:11292			Count: very many		Andy Lamb								PRESENT				Bolinopsis infundibulum					iNaturalist:492705								Bolinopsis infundibulum							Animalia	Ctenophora	Tentaculata	Lobata	Bolinopsidae	Bolinopsis	infundibulum		species		(O.F. Müller, 1776)
	imerss.org:PMLS:11617			Count: few		Andy Lamb								PRESENT				Bolinopsis infundibulum					iNaturalist:492705								Bolinopsis infundibulum							Animalia	Ctenophora	Tentaculata	Lobata	Bolinopsidae	Bolinopsis	infundibulum		species		(O.F. Müller, 1776)
	imerss.org:PMLS:12959			Count: abundant		Andy Lamb								PRESENT				Bolinopsis infundibulum					iNaturalist:492705								Bolinopsis infundibulum							Animalia	Ctenophora	Tentaculata	Lobata	Bolinopsidae	Bolinopsis	infundibulum		species		(O.F. Müller, 1776)
	imerss.org:PMLS:13059			Count: abundant		Andy Lamb								PRESENT				Bolinopsis infundibulum					iNaturalist:492705								Bolinopsis infundibulum							Animalia	Ctenophora	Tentaculata	Lobata	Bolinopsidae	Bolinopsis	infundibulum		species		(O.F. Müller, 1776)
	imerss.org:PMLS:13291			Count: some		Andy Lamb								PRESENT				Pleurobrachia bachei					iNaturalist:117705								Pleurobrachia bachei							Animalia	Ctenophora	Tentaculata	Cydippida	Pleurobrachiidae	Pleurobrachia	bachei		species		A. Agassiz, 1860
	imerss.org:PMLS:13484			Count: few		Andy Lamb								PRESENT				Pleurobrachia bachei					iNaturalist:117705								Pleurobrachia bachei							Animalia	Ctenophora	Tentaculata	Cydippida	Pleurobrachiidae	Pleurobrachia	bachei		species		A. Agassiz, 1860
	imerss.org:PMLS:14276			Count: very many		Andy Lamb								PRESENT				Pleurobrachia bachei					iNaturalist:117705								Pleurobrachia bachei							Animalia	Ctenophora	Tentaculata	Cydippida	Pleurobrachiidae	Pleurobrachia	bachei		species		A. Agassiz, 1860
	imerss.org:PMLS:14374			Count: few		Andy Lamb								PRESENT				Bolinopsis infundibulum					iNaturalist:492705								Bolinopsis infundibulum							Animalia	Ctenophora	Tentaculata	Lobata	Bolinopsidae	Bolinopsis	infundibulum		species		(O.F. Müller, 1776)
	imerss.org:PMLS:15052			Count: some		Andy Lamb								PRESENT				Pleurobrachia bachei					iNaturalist:117705								Pleurobrachia bachei							Animalia	Ctenophora	Tentaculata	Cydippida	Pleurobrachiidae	Pleurobrachia	bachei		species		A. Agassiz, 1860
	imerss.org:PMLS:15925			Count: some		Andy Lamb								PRESENT				Pleurobrachia bachei					iNaturalist:117705								Pleurobrachia bachei							Animalia	Ctenophora	Tentaculata	Cydippida	Pleurobrachiidae	Pleurobrachia	bachei		species		A. Agassiz, 1860
	imerss.org:PMLS:15926			Count: some		Andy Lamb								PRESENT				Bolinopsis infundibulum					iNaturalist:492705								Bolinopsis infundibulum							Animalia	Ctenophora	Tentaculata	Lobata	Bolinopsidae	Bolinopsis	infundibulum		species		(O.F. Müller, 1776)
	imerss.org:PMLS:16228					Andy Lamb		1						PRESENT				Bolinopsis infundibulum					iNaturalist:492705								Bolinopsis infundibulum							Animalia	Ctenophora	Tentaculata	Lobata	Bolinopsidae	Bolinopsis	infundibulum		species		(O.F. Müller, 1776)
	imerss.org:PMLS:17914			Count: few		Andy Lamb								PRESENT				Pleurobrachia bachei					iNaturalist:117705								Pleurobrachia bachei							Animalia	Ctenophora	Tentaculata	Cydippida	Pleurobrachiidae	Pleurobrachia	bachei		species		A. Agassiz, 1860
	imerss.org:PMLS:17974			Count: few		Andy Lamb								PRESENT				Pleurobrachia bachei					iNaturalist:117705								Pleurobrachia bachei							Animalia	Ctenophora	Tentaculata	Cydippida	Pleurobrachiidae	Pleurobrachia	bachei		species		A. Agassiz, 1860
	imerss.org:PMLS:18509			Count: few		Stefania Gorgopa								PRESENT				Pleurobrachia bachei					iNaturalist:117705								Pleurobrachia bachei							Animalia	Ctenophora	Tentaculata	Cydippida	Pleurobrachiidae	Pleurobrachia	bachei		species		A. Agassiz, 1860
	imerss.org:PMLS:18510			Count: very many		Stefania Gorgopa								PRESENT				Bolinopsis infundibulum					iNaturalist:492705								Bolinopsis infundibulum							Animalia	Ctenophora	Tentaculata	Lobata	Bolinopsidae	Bolinopsis	infundibulum		species		(O.F. Müller, 1776)
	imerss.org:PMLS:18568			Count: few		Stefania Gorgopa								PRESENT				Pleurobrachia bachei					iNaturalist:117705								Pleurobrachia bachei							Animalia	Ctenophora	Tentaculata	Cydippida	Pleurobrachiidae	Pleurobrachia	bachei		species		A. Agassiz, 1860
	imerss.org:PMLS:18569			Count: very many		Stefania Gorgopa								PRESENT				Bolinopsis infundibulum					iNaturalist:492705								Bolinopsis infundibulum							Animalia	Ctenophora	Tentaculata	Lobata	Bolinopsidae	Bolinopsis	infundibulum		species		(O.F. Müller, 1776)
	imerss.org:iNat:2976644					Peter								PRESENT				Bolinopsis infundibulum					iNaturalist:492705								Bolinopsis infundibulum							Animalia	Ctenophora	Tentaculata	Lobata	Bolinopsidae	Bolinopsis	infundibulum		species		(O.F. Müller, 1776)
	imerss.org:iNat:4028653					Karolle Wall								PRESENT				Pleurobrachia bachei					iNaturalist:117705								Pleurobrachia bachei							Animalia	Ctenophora	Tentaculata	Cydippida	Pleurobrachiidae	Pleurobrachia	bachei		species		A. Agassiz, 1860
	imerss.org:iNat:30012073					Galiano observer								PRESENT				Bolinopsis infundibulum					iNaturalist:492705								Bolinopsis infundibulum							Animalia	Ctenophora	Tentaculata	Lobata	Bolinopsidae	Bolinopsis	infundibulum		species		(O.F. Müller, 1776)
	imerss.org:iNat:45326898					Andrew Simon								PRESENT				Beroe abyssicola					iNaturalist:1090851								Beroe abyssicola							Animalia	Ctenophora	Nuda	Beroida	Beroidae	Beroe	abyssicola		species		Mortensen, 1927
	imerss.org:iNat:57175255					Catiemac								PRESENT				Beroe abyssicola					iNaturalist:1090851								Beroe abyssicola							Animalia	Ctenophora	Nuda	Beroida	Beroidae	Beroe	abyssicola		species		Mortensen, 1927
	imerss.org:iNat:69843303													PRESENT				Beroe abyssicola					iNaturalist:1090851								Beroe abyssicola							Animalia	Ctenophora	Nuda	Beroida	Beroidae	Beroe	abyssicola		species		Mortensen, 1927
	imerss.org:iNat:69845920					Dave Zeuss Cochrane								PRESENT				Euplokamis dunlapae					iNaturalist:873875								Euplokamis dunlapae							Animalia	Ctenophora	Tentaculata	Cydippida	Euplokamididae	Euplokamis	dunlapae		species		Mills, 1987
	imerss.org:iNat:73718012					Andrew Simon								PRESENT				Pleurobrachia bachei					iNaturalist:117705								Pleurobrachia bachei							Animalia	Ctenophora	Tentaculata	Cydippida	Pleurobrachiidae	Pleurobrachia	bachei		species		A. Agassiz, 1860
	imerss.org:iNat:73718015					Andrew Simon								PRESENT				Beroe abyssicola					iNaturalist:1090851								Beroe abyssicola							Animalia	Ctenophora	Nuda	Beroida	Beroidae	Beroe	abyssicola		species		Mortensen, 1927
	imerss.org:iNat:73718023					Andrew Simon								PRESENT				Pleurobrachia bachei					iNaturalist:117705								Pleurobrachia bachei							Animalia	Ctenophora	Tentaculata	Cydippida	Pleurobrachiidae	Pleurobrachia	bachei		species		A. Agassiz, 1860
	imerss.org:iNat:73718027					Andrew Simon								PRESENT				Bolinopsis infundibulum					iNaturalist:492705								Bolinopsis infundibulum							Animalia	Ctenophora	Tentaculata	Lobata	Bolinopsidae	Bolinopsis	infundibulum		species		(O.F. Müller, 1776)
	imerss.org:iNat:74472231					Andrew Simon								PRESENT				Beroe abyssicola					iNaturalist:1090851								Beroe abyssicola							Animalia	Ctenophora	Nuda	Beroida	Beroidae	Beroe	abyssicola		species		Mortensen, 1927
	imerss.org:iNat:74472270					Andrew Simon								PRESENT				Pleurobrachia bachei					iNaturalist:117705								Pleurobrachia bachei							Animalia	Ctenophora	Tentaculata	Cydippida	Pleurobrachiidae	Pleurobrachia	bachei		species		A. Agassiz, 1860
	imerss.org:iNat:74472285					Andrew Simon								PRESENT				Bolinopsis infundibulum					iNaturalist:492705								Bolinopsis infundibulum							Animalia	Ctenophora	Tentaculata	Lobata	Bolinopsidae	Bolinopsis	infundibulum		species		(O.F. Müller, 1776)
	imerss.org:iNat:74605862					Andrew Simon								PRESENT				Pleurobrachia bachei					iNaturalist:117705								Pleurobrachia bachei							Animalia	Ctenophora	Tentaculata	Cydippida	Pleurobrachiidae	Pleurobrachia	bachei		species		A. Agassiz, 1860
[truncated: 105 more columns]

## Sheet: ExternalLinks
Taxon_Local_ID	Link type	Link
