# Supplementary material for: Toward an atlas of Salish Sea biodiversity: the flora and fauna of Galiano Island, British Columbia, Canada. Part I. Marine zoology
Source: Biodivers Data J. 2022 Mar 10;10:e76050. doi: 10.3897/BDJ.10.e76050 (PMC8930920; doi:10.3897/BDJ.10.e76050)
Supplement: Supplementary material 6 — Platyhelminthes of Galiano Island, British Columbia, Canada [file bdj-10-e76050-s006.xlsx]

## Sheet: Taxa
Taxon_Local_ID	Kingdom	Subkingdom	Phylum	Subphylum	Superclass	Class	Subclass	Superorder	Order	Suborder	Infraorder	Superfamily	Family	Subfamily	Tribe	Subtribe	Genus	Subgenus	Species	Subspecies	Variety	Form	Authorship	Nomenclature	Feeds on	symbioticWith	parasiteOf	Host of	Native Status	Conservation Status	Distribution	Horizon	Notes
56699	Animalia		Platyhelminthes	Rhabditophora					Polycladida	Acotylea		Stylochoidea	Callioplanidae				Kaburakia		excelsa				Bock, 1925
447179	Animalia		Platyhelminthes	Rhabditophora					Polycladida	Cotylea			Euryleptidae				Eurylepta		leoparda				Freeman, 1933

## Sheet: Materials
typeStatus	occurrenceID	catalogNumber	occurrenceDetails	occurrenceRemarks	recordNumber	recordedBy	individualID	individualCount	sex	lifeStage	reproductiveCondition	behavior	establishmentMeans	occurrenceStatus	preparations	disposition	otherCatalogNumbers	previousIdentifications	associatedMedia	associatedReferences	associatedOccurrences	associatedSequences	taxonID	scientificNameID	acceptedNameUsageID	parentNameUsageID	originalNameUsageID	nameAccordingToID	namePublishedInID	taxonConceptID	scientificName	acceptedNameUsage	parentNameUsage	originalNameUsage	nameAccordingTo	namePublishedIn	higherClassification	kingdom	phylum	class	order	family	genus	specificEpithet	infraspecificEpithet	taxonRank	verbatimTaxonRank	scientificNameAuthorship	vernacularName
	imerss.org:PMLS:2400					Charlie Gibbs								PRESENT				Eurylepta leoparda					iNaturalist:447179								Eurylepta leoparda							Animalia	Platyhelminthes		Polycladida	Euryleptidae	Eurylepta	leoparda		species		Freeman, 1933
	imerss.org:PMLS:3203					Andy Lamb		1						PRESENT				Eurylepta leoparda					iNaturalist:447179								Eurylepta leoparda							Animalia	Platyhelminthes		Polycladida	Euryleptidae	Eurylepta	leoparda		species		Freeman, 1933
	imerss.org:PMLS:10679					Andy Lamb		1						PRESENT				Eurylepta leoparda					iNaturalist:447179								Eurylepta leoparda							Animalia	Platyhelminthes		Polycladida	Euryleptidae	Eurylepta	leoparda		species		Freeman, 1933
	imerss.org:PMLS:16808					Andy Lamb		1						PRESENT				Eurylepta leoparda					iNaturalist:447179								Eurylepta leoparda							Animalia	Platyhelminthes		Polycladida	Euryleptidae	Eurylepta	leoparda		species		Freeman, 1933
	imerss.org:PMLS:17590					Andy Lamb		1						PRESENT				Kaburakia excelsa					iNaturalist:56699								Kaburakia excelsa							Animalia	Platyhelminthes		Polycladida	Callioplanidae	Kaburakia	excelsa		species		Bock, 1925
	imerss.org:iNat:4028701					Karolle Wall								PRESENT				Eurylepta leoparda					iNaturalist:447179								Eurylepta leoparda							Animalia	Platyhelminthes		Polycladida	Euryleptidae	Eurylepta	leoparda		species		Freeman, 1933
	imerss.org:iNat:24259233					Andrew Simon								PRESENT				Kaburakia excelsa					iNaturalist:56699								Kaburakia excelsa							Animalia	Platyhelminthes		Polycladida	Callioplanidae	Kaburakia	excelsa		species		Bock, 1925
	imerss.org:iNat:24632552													PRESENT				Kaburakia excelsa					iNaturalist:56699								Kaburakia excelsa							Animalia	Platyhelminthes		Polycladida	Callioplanidae	Kaburakia	excelsa		species		Bock, 1925
[truncated: 105 more columns]

## Sheet: ExternalLinks
Taxon_Local_ID	Link type	Link
