# Supplementary material for: Toward an atlas of Salish Sea biodiversity: the flora and fauna of Galiano Island, British Columbia, Canada. Part I. Marine zoology
Source: Biodivers Data J. 2022 Mar 10;10:e76050. doi: 10.3897/BDJ.10.e76050 (PMC8930920; doi:10.3897/BDJ.10.e76050)
Supplement: Supplementary material 7 — Chaetognatha of Galiano Island, British Columbia, Canada [file bdj-10-e76050-s007.xlsx]

## Sheet: Taxa
Taxon_Local_ID	Kingdom	Subkingdom	Phylum	Subphylum	Superclass	Class	Subclass	Superorder	Order	Suborder	Infraorder	Superfamily	Family	Subfamily	Tribe	Subtribe	Genus	Subgenus	Species	Subspecies	Variety	Form	Authorship	Nomenclature	Feeds on	symbioticWith	parasiteOf	Host of	Native Status	Conservation Status	Distribution	Horizon	Notes
246116	Animalia		Chaetognatha			Sagittoidea																											PMLS records of Parasagitta elegans cannot be confirmed. Eukrohnia hamata Mijbius (1875) has been documented within the Salish Sea, where it occurs infrequently, being an oceanic species occasionally borne in by the intrusion of offshore waters

## Sheet: Materials
typeStatus	occurrenceID	catalogNumber	occurrenceDetails	occurrenceRemarks	recordNumber	recordedBy	individualID	individualCount	sex	lifeStage	reproductiveCondition	behavior	establishmentMeans	occurrenceStatus	preparations	disposition	otherCatalogNumbers	previousIdentifications	associatedMedia	associatedReferences	associatedOccurrences	associatedSequences	taxonID	scientificNameID	acceptedNameUsageID	parentNameUsageID	originalNameUsageID	nameAccordingToID	namePublishedInID	taxonConceptID	scientificName	acceptedNameUsage	parentNameUsage	originalNameUsage	nameAccordingTo	namePublishedIn	higherClassification	kingdom	phylum	class	order	family	genus	specificEpithet	infraspecificEpithet	taxonRank	verbatimTaxonRank	scientificNameAuthorship	vernacularName
	imerss.org:PMLS:1326					Charlie Gibbs								PRESENT				Sagittoidea					iNaturalist:246116															Animalia	Chaetognatha	Sagittoidea						class
	imerss.org:PMLS:1576					Charlie Gibbs								PRESENT				Sagittoidea					iNaturalist:246116															Animalia	Chaetognatha	Sagittoidea						class
	imerss.org:PMLS:1816					Charlie Gibbs								PRESENT				Sagittoidea					iNaturalist:246116															Animalia	Chaetognatha	Sagittoidea						class
	imerss.org:PMLS:2089					Charlie Gibbs								PRESENT				Sagittoidea					iNaturalist:246116															Animalia	Chaetognatha	Sagittoidea						class
	imerss.org:PMLS:10571			Count: some		Andy Lamb								PRESENT				Sagittoidea					iNaturalist:246116															Animalia	Chaetognatha	Sagittoidea						class
[truncated: 105 more columns]

## Sheet: ExternalLinks
Taxon_Local_ID	Link type	Link
