# Supplementary material for: Toward an atlas of Salish Sea biodiversity: the flora and fauna of Galiano Island, British Columbia, Canada. Part I. Marine zoology
Source: Biodivers Data J. 2022 Mar 10;10:e76050. doi: 10.3897/BDJ.10.e76050 (PMC8930920; doi:10.3897/BDJ.10.e76050)
Supplement: Supplementary material 8 — Mollusca of Galiano Island, British Columbia, Canada [file bdj-10-e76050-s008.xlsx]

## Sheet: Taxa
Taxon_Local_ID	Kingdom	Subkingdom	Phylum	Subphylum	Superclass	Class	Subclass	Superorder	Order	Suborder	Infraorder	Superfamily	Family	Subfamily	Tribe	Subtribe	Genus	Subgenus	Species	Subspecies	Variety	Form	Authorship	Nomenclature	Feeds on	symbioticWith	parasiteOf	Host of	Native Status	Conservation Status	Distribution	Horizon	Notes
339164	Animalia		Mollusca			Bivalvia	Autobranchia	Anomalodesmata				Pandoroidea	Lyonsiidae				Entodesma		navicula				(Adams & Reeve, 1850)
1118981	Animalia		Mollusca			Bivalvia	Autobranchia	Anomalodesmata				Pandoroidea	Lyonsiidae				Lyonsia		bracteata				(Gould, 1850)										Accessioned in collections at the RBCM as Lyonsia californica (RBCM 979-03305). The original ID by Ian McTaggart-Cowan is Lyonsia pugetensis which is now accepted as Lyonsia bracteata (WoRMS Editorial Board 2021).
873896	Animalia		Mollusca			Bivalvia	Autobranchia	Anomalodesmata				Pandoroidea	Lyonsiidae				Mytilimeria		nuttalli				Conrad, 1837
906400	Animalia		Mollusca			Bivalvia	Autobranchia	Anomalodesmata				Pandoroidea	Pandoridae				Pandora		filosa				(Carpenter, 1864)
906421	Animalia		Mollusca			Bivalvia	Autobranchia	Anomalodesmata				Pandoroidea	Pandoridae				Pandora		wardiana				A. Adams, 1860
957343	Animalia		Mollusca			Bivalvia	Autobranchia	Anomalodesmata				Thracioidea	Thraciidae				Thracia		trapezoides				Conrad, 1849
865774	Animalia		Mollusca			Bivalvia	Autobranchia	Imparidentia	Adapedonta			Hiatelloidea	Hiatellidae				Panomya		ampla				Dall, 1898
117618	Animalia		Mollusca			Bivalvia	Autobranchia	Imparidentia	Adapedonta			Hiatelloidea	Hiatellidae				Panopea		generosa				Gould, 1850
54529	Animalia		Mollusca			Bivalvia	Autobranchia	Imparidentia	Adapedonta			Solenoidea	Solenidae				Solen		sicarius				Gould, 1850
479438	Animalia		Mollusca			Bivalvia	Autobranchia		Arcida			Arcoidea	Glycymerididae				Glycymeris		septentrionalis				(Middendorff, 1849)										Accessioned in collections at the RBCM as Glycymeris subobsoleta, an unaccepted synonym (WoRMS Editorial Board 2021).
962184	Animalia		Mollusca			Bivalvia	Autobranchia	Imparidentia	Cardiida			Cardioidea	Cardiidae				Keenaea		centifilosa				(Carpenter, 1864)
940646	Animalia		Mollusca			Bivalvia	Autobranchia	Imparidentia	Cardiida			Cardioidea	Cardiidae	Clinocardiinae			Ciliatocardium		ciliatum				(Fabricius, 1780)										Reported as Clinocardium ciliatum, an unaccepted synonym (WoRMS Editorial Board 2021).
69925	Animalia		Mollusca			Bivalvia	Autobranchia	Imparidentia	Cardiida			Cardioidea	Cardiidae	Clinocardiinae			Clinocardium		nuttallii				(Conrad, 1837)
940598	Animalia		Mollusca			Bivalvia	Autobranchia	Imparidentia	Cardiida			Cardioidea	Cardiidae	Clinocardiinae			Keenocardium		blandum				(Gould, 1850)
354323	Animalia		Mollusca			Bivalvia	Autobranchia	Imparidentia	Cardiida			Tellinoidea	Psammobiidae				Gari		californica				(Conrad, 1849)
430211	Animalia		Mollusca			Bivalvia	Autobranchia	Imparidentia	Cardiida			Tellinoidea	Psammobiidae				Nuttallia		obscurata				(Reeve, 1857)
371110	Animalia		Mollusca			Bivalvia	Autobranchia	Imparidentia	Cardiida			Tellinoidea	Semelidae				Semele		rubropicta				Dall, 1871
504353	Animalia		Mollusca			Bivalvia	Autobranchia	Imparidentia	Cardiida			Tellinoidea	Tellinidae	Macominae			Macoma		brota				Dall, 1916
861604	Animalia		Mollusca			Bivalvia	Autobranchia	Imparidentia	Cardiida			Tellinoidea	Tellinidae	Macominae			Macoma		calcarea				(Gmelin, 1791)
957354	Animalia		Mollusca			Bivalvia	Autobranchia	Imparidentia	Cardiida			Tellinoidea	Tellinidae	Macominae			Macoma		carlottensis				Whiteaves, 1880										Accessioned in collections at the RBCM as Macoma inflatula, an unaccepted synonym (WoRMS Editorial Board 2021).
117612	Animalia		Mollusca			Bivalvia	Autobranchia	Imparidentia	Cardiida			Tellinoidea	Tellinidae	Macominae			Macoma		nasuta				(Conrad, 1837)
861605	Animalia		Mollusca			Bivalvia	Autobranchia	Imparidentia	Cardiida			Tellinoidea	Tellinidae	Macominae			Macoma		obliqua				(J. Sowerby, 1817)
1223439	Animalia		Mollusca			Bivalvia	Autobranchia		Carditida			Carditoidea	Carditidae	Scalaricarditinae			Coanicardita		ventricosa				(Gould, 1850)										Reported as Cyclocardia ventricosa, an unaccepted synonym (WoRMS Editorial Board 2021).
253475	Animalia		Mollusca			Bivalvia	Autobranchia	Imparidentia	Galeommatida			Galeommatoidea	Lasaeidae				Kellia		suborbicularis				(Montagu, 1803)
493882	Animalia		Mollusca			Bivalvia	Autobranchia	Imparidentia	Lucinida			Lucinoidea	Lucinidae	Lucininae			Parvilucina		tenuisculpta				(Carpenter, 1864)
977317	Animalia		Mollusca			Bivalvia	Autobranchia	Imparidentia	Lucinida			Thyasiroidea	Thyasiridae				Axinopsida		serricata				(Carpenter, 1864)
81634	Animalia		Mollusca			Bivalvia	Autobranchia	Imparidentia	Myida			Myoidea	Myidae				Mya		arenaria				Linnaeus, 1758
447416	Animalia		Mollusca			Bivalvia	Autobranchia	Imparidentia	Myida			Myoidea	Myidae				Mya		truncata				Linnaeus, 1758
117472	Animalia		Mollusca			Bivalvia	Autobranchia	Imparidentia	Myida			Pholadoidea	Pholadidae	Pholadinae			Zirfaea		pilsbryi				H. N. Lowe, 1931
347368	Animalia		Mollusca			Bivalvia	Autobranchia	Imparidentia	Myida			Pholadoidea	Teredinidae	Bankiinae			Bankia		setacea				(Tryon, 1863)
193939	Animalia		Mollusca			Bivalvia	Autobranchia		Mytilida			Mytiloidea	Mytilidae	Crenellinae			Crenella		decussata				(Montagu, 1808)
123772	Animalia		Mollusca			Bivalvia	Autobranchia		Mytilida			Mytiloidea	Mytilidae	Modiolinae			Modiolus		modiolus				(Linnaeus, 1758)
196218	Animalia		Mollusca			Bivalvia	Autobranchia		Mytilida			Mytiloidea	Mytilidae	Modiolinae			Modiolus		rectus				(Conrad, 1837)
482998	Animalia		Mollusca			Bivalvia	Autobranchia		Mytilida			Mytiloidea	Mytilidae	Musculinae			Musculus		discors				(Linnaeus, 1767)
483000	Animalia		Mollusca			Bivalvia	Autobranchia		Mytilida			Mytiloidea	Mytilidae	Musculinae			Musculus		niger				(J.E. Gray, 1824)
1108240	Animalia		Mollusca			Bivalvia	Autobranchia		Mytilida			Mytiloidea	Mytilidae	Mytilinae			Mytilus		edulis complex														In the field, mature Mytilus trossulus can often be distinguished from M. galloprovincialis, M. edulis, and related hybrids by examing the siphon-mantle features of the live animal. Identification by shell shapes and sizes is otherwise inconclusive and remains limited to the level of species complex.
605992	Animalia		Mollusca			Bivalvia	Autobranchia		Ostreida			Ostreoidea	Ostreidae	Crassostreinae			Magallana		gigas				(Thunberg, 1793)
68652	Animalia		Mollusca			Bivalvia	Autobranchia		Pectinida			Anomioidea	Anomiidae				Pododesmus		macrochisma				(Deshayes, 1839)
180013	Animalia		Mollusca			Bivalvia	Autobranchia		Pectinida			Pectinoidea	Pectinidae	Pedinae	Chlamydini		Chlamys		hastata				(G. B. Sowerby II, 1842)										The name Chlamys hastata hericia, reported by Dan Quayle (RBCM 989-00923-001), is unaccepted (WoRMS Editorial Board 2021).
84496	Animalia		Mollusca			Bivalvia	Autobranchia		Pectinida			Pectinoidea	Pectinidae	Pedinae	Chlamydini		Chlamys		rubida				(Hinds, 1845)										RBCM records report this specimen under the name of Chlamys islandica—an erroneous application of an Atlantic species concept.
54526	Animalia		Mollusca			Bivalvia	Autobranchia		Pectinida			Pectinoidea	Pectinidae	Pedinae	Crassadomini		Crassadoma		gigantea				(J.E. Gray, 1825)
203116	Animalia		Mollusca			Bivalvia	Autobranchia		Pectinida			Pectinoidea	Pectinidae	Pedinae	Fortipectinini		Patinopecten		caurinus				(Gould, 1850)
126927	Animalia		Mollusca			Bivalvia	Autobranchia	Imparidentia	Venerida			Mactroidea	Mactridae	Lutrariinae			Tresus		capax				(Gould, 1850)
117611	Animalia		Mollusca			Bivalvia	Autobranchia	Imparidentia	Venerida			Mactroidea	Mactridae	Lutrariinae			Tresus		nuttallii				(Conrad, 1837)
1118984	Animalia		Mollusca			Bivalvia	Autobranchia	Imparidentia	Venerida			Ungulinoidea	Ungulinidae				Zemysina		impolita				(S. S. Berry, 1953)										McTaggart-Cowan reports Diplodonta orbella (=Zemysina orbella) (RBCM 979-00293). However, this taxon has since been split, with Zemysina orbella recognized as the southern and Zemysina impolita as the northern species.
957357	Animalia		Mollusca			Bivalvia	Autobranchia	Imparidentia	Venerida			Veneroidea	Veneridae				Compsomyax		subdiaphana				(Carpenter, 1864)
873901	Animalia		Mollusca			Bivalvia	Autobranchia	Imparidentia	Venerida			Veneroidea	Veneridae				Humilaria		kennerleyi				(Reeve, 1863)
343269	Animalia		Mollusca			Bivalvia	Autobranchia	Imparidentia	Venerida			Veneroidea	Veneridae				Ruditapes		philippinarum				(A. Adams & Reeve, 1850)
130233	Animalia		Mollusca			Bivalvia	Autobranchia	Imparidentia	Venerida			Veneroidea	Veneridae				Saxidomus		gigantea				(Deshayes, 1839)
333608	Animalia		Mollusca			Bivalvia	Autobranchia	Imparidentia	Venerida			Veneroidea	Veneridae	Chioninae			Leukoma		staminea				(Conrad, 1837)
957348	Animalia		Mollusca			Bivalvia	Protobranchia		Nuculanida			Nuculanoidea	Nuculanidae	Nuculaninae			Nuculana		leonina				(Dall, 1896)
957355	Animalia		Mollusca			Bivalvia	Protobranchia		Nuculanida			Nuculanoidea	Yoldiidae				Megayoldia		thraciaeformis				(Storer, 1838)										Accessioned in collections at the RBCM as Yoldia thraciaeformis, an unaccepted synonym (WoRMS Editorial Board 2021).
957342	Animalia		Mollusca			Bivalvia	Protobranchia		Nuculanida			Nuculanoidea	Yoldiidae				Yoldia		aeolica				(Valenciennes, 1846)										Accessioned in collections at the RBCM as Yoldia scissurata and Yoldia ensifera, unaccepted synonyms (WoRMS Editorial Board 2021).
996928	Animalia		Mollusca			Bivalvia	Protobranchia		Nuculanida			Nuculanoidea	Yoldiidae				Yoldia		hyperborea				(Gould, 1841)										Accessioned in collections at the RBCM as Yoldia hyperborea limatuloides, an unaccepted subspecies (WoRMS Editorial Board 2021); also reported as Yoldia amygdalea (Valenciennes, 1846), an unaccepted taxon (WoRMS Editorial Board 2021)
339158	Animalia		Mollusca			Bivalvia	Protobranchia		Nuculida			Nuculoidea	Nuculidae				Acila		castrensis				(Hinds, 1843)
202045	Animalia		Mollusca			Bivalvia	Protobranchia		Nuculida			Nuculoidea	Nuculidae				Ennucula		tenuis				(Montagu, 1808)
153981	Animalia		Mollusca			Cephalopoda	Coleoidea	Decapodiformes	Myopsida				Loliginidae				Doryteuthis		opalescens				(Berry, 1911)
48863	Animalia		Mollusca			Cephalopoda	Coleoidea	Octopodiformes	Octopoda	Incirrata		Octopodoidea	Enteroctopodidae				Enteroctopus		dofleini				(Wülker, 1910)
47455	Animalia		Mollusca			Cephalopoda	Coleoidea	Octopodiformes	Octopoda	Incirrata		Octopodoidea	Octopodidae				Octopus		rubescens				Berry, 1953
432390	Animalia		Mollusca			Cephalopoda	Coleoidea	Decapodiformes	Oegopsida			Onychoteuthoidea	Gonatidae				Berryteuthis		magister				(Berry, 1913)
151358	Animalia		Mollusca			Cephalopoda	Coleoidea	Decapodiformes	Sepiida	Sepiolina		Sepioloidea	Sepiolidae	Rossiinae			Rossia		pacifica				Berry, 1911
68783	Animalia		Mollusca			Gastropoda	Caenogastropoda					Cerithioidea	Batillariidae				Batillaria		attramentaria				(G. B. Sowerby II, 1855)
897701	Animalia		Mollusca			Gastropoda	Caenogastropoda					Cerithioidea	Cerithiidae	Bittiinae			Neostylidium		eschrichtii				(Middendorff, 1849)
893102	Animalia		Mollusca			Gastropoda	Caenogastropoda					Epitonioidea	Epitoniidae				Epitonium		hindsii				(Carpenter, 1856)
129921	Animalia		Mollusca			Gastropoda	Caenogastropoda					Epitonioidea	Epitoniidae				Epitonium		indianorum				(Carpenter, 1865)
117325	Animalia		Mollusca			Gastropoda	Caenogastropoda		Littorinimorpha			Calyptraeoidea	Calyptraeidae				Crepidula		cf nummaria
485954	Animalia		Mollusca			Gastropoda	Caenogastropoda		Littorinimorpha			Calyptraeoidea	Calyptraeidae				Crepidula		norrisiarum				Williamson, 1905										Reports of Crepidula cf adunca have been determined as Crepidula norrisiarum (Collin et al., in press).
447177	Animalia		Mollusca			Gastropoda	Caenogastropoda		Littorinimorpha			Capuloidea	Capulidae				Trichotropis		cancellata				Hinds, 1843
339150	Animalia		Mollusca			Gastropoda	Caenogastropoda		Littorinimorpha			Littorinoidea	Littorinidae	Lacuninae			Lacuna		variegata				Carpenter, 1864
69995	Animalia		Mollusca			Gastropoda	Caenogastropoda		Littorinimorpha			Littorinoidea	Littorinidae	Littorininae			Littorina		scutulata				Gould, 1849
129298	Animalia		Mollusca			Gastropoda	Caenogastropoda		Littorinimorpha			Littorinoidea	Littorinidae	Littorininae			Littorina		sitkana				Philippi, 1846
507519	Animalia		Mollusca			Gastropoda	Caenogastropoda		Littorinimorpha			Naticoidea	Naticidae	Naticinae			Cryptonatica		aleutica				(Dall, 1919)
873876	Animalia		Mollusca			Gastropoda	Caenogastropoda		Littorinimorpha			Naticoidea	Naticidae	Polinicinae			Euspira		pallida				(Broderip & G. B. Sowerby I, 1829)
447427	Animalia		Mollusca			Gastropoda	Caenogastropoda		Littorinimorpha			Naticoidea	Naticidae	Polinicinae			Neverita		lewisii				(Gould, 1847)										Reported as Euspira lewisii, an unaccepted synonym (WoRMS Editorial Board 2021).
448389	Animalia		Mollusca			Gastropoda	Caenogastropoda		Littorinimorpha			Tonnoidea	Cymatiidae				Fusitriton		oregonensis				(Redfield, 1846)
733259	Animalia		Mollusca			Gastropoda	Caenogastropoda		Littorinimorpha			Vanikoroidea	Eulimidae				Melanella		micans				(Carpenter, 1865)
337741	Animalia		Mollusca			Gastropoda	Caenogastropoda		Littorinimorpha			Velutinoidea	Velutinidae	Velutininae			Marsenina		rhombica				(Dall, 1871)
53555	Animalia		Mollusca			Gastropoda	Caenogastropoda		Littorinimorpha			Velutinoidea	Velutinidae	Velutininae			Marsenina		stearnsii				(Dall, 1871)
482348	Animalia		Mollusca			Gastropoda	Caenogastropoda		Littorinimorpha			Velutinoidea	Velutinidae	Velutininae			Velutina		plicatilis				(O. F. Müller, 1776)
482347	Animalia		Mollusca			Gastropoda	Caenogastropoda		Littorinimorpha			Velutinoidea	Velutinidae	Velutininae			Velutina		velutina				(O. F. Müller, 1776)
883089	Animalia		Mollusca			Gastropoda	Caenogastropoda		Littorinimorpha			Vermetoidea	Vermetidae				Petaloconchus		cf compactus														Reported as Vermetus compactus (Carpenter, 1864), an unaccepted synonym (WoRMS Editorial Board 2021); this genus requires more work.
129933	Animalia		Mollusca			Gastropoda	Caenogastropoda		Neogastropoda			Buccinoidea	Columbellidae				Alia		carinata				(Hinds, 1844)
117643	Animalia		Mollusca			Gastropoda	Caenogastropoda		Neogastropoda			Buccinoidea	Columbellidae				Amphissa		columbiana				Dall, 1916
129932	Animalia		Mollusca			Gastropoda	Caenogastropoda		Neogastropoda			Buccinoidea	Columbellidae				Amphissa		versicolor				Dall, 1871
347322	Animalia		Mollusca			Gastropoda	Caenogastropoda		Neogastropoda			Buccinoidea	Columbellidae				Mitrella		gausapata				(Gould, 1850)
246721	Animalia		Mollusca			Gastropoda	Caenogastropoda		Neogastropoda			Buccinoidea	Columbellidae				Nitidella		sp.
129947	Animalia		Mollusca			Gastropoda	Caenogastropoda		Neogastropoda			Buccinoidea	Fasciolariidae	Fusininae			Fusinus		sp.
129938	Animalia		Mollusca			Gastropoda	Caenogastropoda		Neogastropoda			Buccinoidea	Nassariidae	Nassariinae			Nassarius		mendicus				(Gould, 1850)
117642	Animalia		Mollusca			Gastropoda	Caenogastropoda		Neogastropoda			Buccinoidea	Tudiclidae				Lirabuccinum		dirum				(Reeve, 1846)
957347	Animalia		Mollusca			Gastropoda	Caenogastropoda		Neogastropoda			Conoidea	Borsoniidae				Ophiodermella		fancherae				(Dall, 1903)
496394	Animalia		Mollusca			Gastropoda	Caenogastropoda		Neogastropoda			Conoidea	Mangeliidae				Oenopota		sp.
116687	Animalia		Mollusca			Gastropoda	Caenogastropoda		Neogastropoda			Muricoidea	Muricidae	Ocenebrinae			Ceratostoma		foliatum				(Gmelin, 1791)
69998	Animalia		Mollusca			Gastropoda	Caenogastropoda		Neogastropoda			Muricoidea	Muricidae	Ocenebrinae			Nucella		canaliculata				(Duclos, 1832)
117641	Animalia		Mollusca			Gastropoda	Caenogastropoda		Neogastropoda			Muricoidea	Muricidae	Ocenebrinae			Nucella		lamellosa				(Gmelin, 1791)
122704	Animalia		Mollusca			Gastropoda	Caenogastropoda		Neogastropoda			Muricoidea	Muricidae	Ocenebrinae			Nucella		ostrina				(Gould, 1852)
910801	Animalia		Mollusca			Gastropoda	Caenogastropoda		Neogastropoda			Muricoidea	Muricidae	Ocenebrinae			Paciocinebrina		interfossa				(Carpenter, 1864)
910800	Animalia		Mollusca			Gastropoda	Caenogastropoda		Neogastropoda			Muricoidea	Muricidae	Ocenebrinae			Paciocinebrina		lurida				(Middendorff, 1848)
506559	Animalia		Mollusca			Gastropoda	Caenogastropoda		Neogastropoda			Muricoidea	Muricidae	Pagodulinae			Trophonopsis		orpheus				(Gould, 1849)
500269	Animalia		Mollusca			Gastropoda	Caenogastropoda		Neogastropoda			Muricoidea	Muricidae	Trophoninae			Scabrotrophon		maltzani				(Kobelt, 1878)
49779	Animalia		Mollusca			Gastropoda	Heterobranchia					Acteonoidea	Acteonidae				Rictaxis		punctocaelatus				(Carpenter, 1864)
129939	Animalia		Mollusca			Gastropoda	Heterobranchia	Pylopulmonata				Pyramidelloidea	Pyramidellidae				Odostomia		sp.
84989	Animalia		Mollusca			Gastropoda	Heterobranchia	Pylopulmonata				Pyramidelloidea	Pyramidellidae	Turbonillinae			Turbonilla		sp.
49864	Animalia		Mollusca			Gastropoda	Heterobranchia		Aplysiida			Aplysioidea	Aplysiidae				Phyllaplysia		taylori				Dall, 1900
49788	Animalia		Mollusca			Gastropoda	Heterobranchia		Cephalaspidea			Bulloidea	Tornatinidae				Acteocina		culcitella				(Gould, 1853)										Accessioned in collections at the RBCM as Cylichnella culcitella, an unrecognized name (WoRMS Editorial Board 2021).
49792	Animalia		Mollusca			Gastropoda	Heterobranchia		Cephalaspidea			Cylichnoidea	Cylichnidae				Cylichna		attonsa				Carpenter, 1865
49812	Animalia		Mollusca			Gastropoda	Heterobranchia		Cephalaspidea			Haminoeoidea	Haminoeidae				Haminoea		vesicula				(Gould, 1855)
49842	Animalia		Mollusca			Gastropoda	Heterobranchia		Cephalaspidea			Philinoidea	Aglajidae				Aglaja		ocelligera				(Bergh, 1894)
345334	Animalia		Mollusca			Gastropoda	Heterobranchia		Cephalaspidea			Philinoidea	Aglajidae				Melanochlamys		diomedea				(Bergh, 1894)
49839	Animalia		Mollusca			Gastropoda	Heterobranchia		Cephalaspidea			Philinoidea	Gastropteridae				Gastropteron		pacificum				Bergh, 1894
225386	Animalia		Mollusca			Gastropoda	Heterobranchia	Eupulmonata	Ellobiida			Ellobioidea	Ellobiidae	Pythiinae			Myosotella		myosotis				(Draparnaud, 1801)
498117	Animalia		Mollusca			Gastropoda	Heterobranchia	Nudipleura	Nudibranchia	Cladobranchia		Aeolidioidea	Aeolidiidae				Aeolidia		loui				Kienberger, Carmona, Pola, Padula, Gosliner & Cervera, 2016
498116	Animalia		Mollusca			Gastropoda	Heterobranchia	Nudipleura	Nudibranchia	Cladobranchia		Aeolidioidea	Aeolidiidae				Aeolidia		papillosa				(Linnaeus, 1761)
50477	Animalia		Mollusca			Gastropoda	Heterobranchia	Nudipleura	Nudibranchia	Cladobranchia		Aeolidioidea	Aeolidiidae				Cerberilla		mosslandica				McDonald & Nybakken, 1975
495552	Animalia		Mollusca			Gastropoda	Heterobranchia	Nudipleura	Nudibranchia	Cladobranchia		Aeolidioidea	Myrrhinidae				Hermissenda		crassicornis				(Eschscholtz, 1831)
47499	Animalia		Mollusca			Gastropoda	Heterobranchia	Nudipleura	Nudibranchia	Cladobranchia		Arminoidea	Arminidae				Armina		californica				(J. G. Cooper, 1863)
50328	Animalia		Mollusca			Gastropoda	Heterobranchia	Nudipleura	Nudibranchia	Cladobranchia		Dendronotoidea	Dendronotidae				Dendronotus		albopunctatus				Robilliard, 1972
47773	Animalia		Mollusca			Gastropoda	Heterobranchia	Nudipleura	Nudibranchia	Cladobranchia		Dendronotoidea	Dendronotidae				Dendronotus		albus				MacFarland, 1966
47706	Animalia		Mollusca			Gastropoda	Heterobranchia	Nudipleura	Nudibranchia	Cladobranchia		Dendronotoidea	Dendronotidae				Dendronotus		iris				J. G. Cooper, 1863
601888	Animalia		Mollusca			Gastropoda	Heterobranchia	Nudipleura	Nudibranchia	Cladobranchia		Dendronotoidea	Dendronotidae				Dendronotus		kamchaticus				Ekimova, Korshunova, Schepetov, Neretina, Sanamyan & Martynov, 2015
882206	Animalia		Mollusca			Gastropoda	Heterobranchia	Nudipleura	Nudibranchia	Cladobranchia		Dendronotoidea	Dendronotidae				Dendronotus		robilliardi				Korshunova, Sanamyan, Zimina, Fletcher & Martynov, 2016
50393	Animalia		Mollusca			Gastropoda	Heterobranchia	Nudipleura	Nudibranchia	Cladobranchia		Dendronotoidea	Dendronotidae				Dendronotus		rufus				O'Donoghue, 1921
47771	Animalia		Mollusca			Gastropoda	Heterobranchia	Nudipleura	Nudibranchia	Cladobranchia		Dendronotoidea	Dendronotidae				Dendronotus		subramosus				MacFarland, 1966
129995	Animalia		Mollusca			Gastropoda	Heterobranchia	Nudipleura	Nudibranchia	Cladobranchia		Dendronotoidea	Dendronotidae				Dendronotus		venustus				MacFarland, 1966
47655	Animalia		Mollusca			Gastropoda	Heterobranchia	Nudipleura	Nudibranchia	Cladobranchia		Dendronotoidea	Dotidae				Doto		amyra				Er. Marcus, 1961
47774	Animalia		Mollusca			Gastropoda	Heterobranchia	Nudipleura	Nudibranchia	Cladobranchia		Dendronotoidea	Dotidae				Doto		columbiana				O'Donoghue, 1921
48455	Animalia		Mollusca			Gastropoda	Heterobranchia	Nudipleura	Nudibranchia	Cladobranchia		Dendronotoidea	Tethydidae				Melibe		leonina				(Gould, 1852)
631469	Animalia		Mollusca			Gastropoda	Heterobranchia	Nudipleura	Nudibranchia	Cladobranchia		Fionoidea	Apataidae				Apata		pricei				(MacFarland, 1966)										Two subspecies are recognized: a Californian subspecies, Apata pricei pricei, as originally described from Monterey, California, and a Western Pacific subspecies, Apata pricei komandorica. No specimens have been sequenced to determine which subspecies are present in the Salish Sea. However, we do not appear to have the subspecies originally described in MacFarland 1966.
633193	Animalia		Mollusca			Gastropoda	Heterobranchia	Nudipleura	Nudibranchia	Cladobranchia		Fionoidea	Coryphellidae				Coryphella		verrucosa				(M. Sars, 1829)										Coryphella verrucosa was originally described from the Atlantic. Coryphella pseudoverrucosa has since been described in the Western Pacific, but a preliminary genetic comparison shows a difference between the Salish Sea specimens and those from the Western Pacific. Specimens have been collected from BC and WA but the paper confirming their identity has not been published.
633561	Animalia		Mollusca			Gastropoda	Heterobranchia	Nudipleura	Nudibranchia	Cladobranchia		Fionoidea	Coryphellidae				Himatina		trophina				(Bergh, 1890)
764704	Animalia		Mollusca			Gastropoda	Heterobranchia	Nudipleura	Nudibranchia	Cladobranchia		Fionoidea	Coryphellidae				Orienthella		trilineata				(O'Donoghue, 1921)
50462	Animalia		Mollusca			Gastropoda	Heterobranchia	Nudipleura	Nudibranchia	Cladobranchia		Fionoidea	Cumanotidae				Cumanotus		fernaldi				T. E. Thompson & G. H. Brown, 1984
521158	Animalia		Mollusca			Gastropoda	Heterobranchia	Nudipleura	Nudibranchia	Cladobranchia		Fionoidea	Cuthonellidae				Cuthonella		concinna				(Alder & Hancock, 1843)
47399	Animalia		Mollusca			Gastropoda	Heterobranchia	Nudipleura	Nudibranchia	Cladobranchia		Fionoidea	Cuthonidae				Cuthona		divae				(Er. Marcus, 1961)
533047	Animalia		Mollusca			Gastropoda	Heterobranchia	Nudipleura	Nudibranchia	Cladobranchia		Fionoidea	Eubranchidae				Eubranchus		rupium				(Møller, 1842)
50471	Animalia		Mollusca			Gastropoda	Heterobranchia	Nudipleura	Nudibranchia	Cladobranchia		Fionoidea	Eubranchidae				Eubranchus		rustyus				(Er. Marcus, 1961)
544965	Animalia		Mollusca			Gastropoda	Heterobranchia	Nudipleura	Nudibranchia	Cladobranchia		Fionoidea	Eubranchidae				Eubranchus		sanjuanensis				Roller, 1972
877359	Animalia		Mollusca			Gastropoda	Heterobranchia	Nudipleura	Nudibranchia	Cladobranchia		Fionoidea	Paracoryphellidae				Ziminella		japonica				(Volodchenko, 1941)										Specimens representing this species have not yet been sequenced, neither from the Salish Sea nor from the Western Pacific.
48973	Animalia		Mollusca			Gastropoda	Heterobranchia	Nudipleura	Nudibranchia	Cladobranchia		Fionoidea	Trinchesiidae				Catriona		columbiana				(O'Donoghue, 1922)
632114	Animalia		Mollusca			Gastropoda	Heterobranchia	Nudipleura	Nudibranchia	Cladobranchia		Fionoidea	Trinchesiidae				Diaphoreolis		viridis				(Forbes, 1840)
1128352	Animalia		Mollusca			Gastropoda	Heterobranchia	Nudipleura	Nudibranchia	Cladobranchia		Fionoidea	Trinchesiidae				Zelentia		nepunicea				Korshunova, Fletcher, Lundin, Picton & Martynov, 2018										Accessioned in collections at the RBCM as Zelentia pustulata, which is now recognized as being limited to the Atlantic. Our Pacific species is Zelentia nepunicea.
47477	Animalia		Mollusca			Gastropoda	Heterobranchia	Nudipleura	Nudibranchia	Cladobranchia		Proctonotoidea	Dironidae				Dirona		albolineata				MacFarland, 1905
50447	Animalia		Mollusca			Gastropoda	Heterobranchia	Nudipleura	Nudibranchia	Cladobranchia		Proctonotoidea	Dironidae				Dirona		pellucida				Volodchenko, 1941
886884	Animalia		Mollusca			Gastropoda	Heterobranchia	Nudipleura	Nudibranchia	Cladobranchia		Proctonotoidea	Janolidae				Antiopella		fusca				(O'Donoghue, 1924)
873733	Animalia		Mollusca			Gastropoda	Heterobranchia	Nudipleura	Nudibranchia	Cladobranchia		Tritonioidea	Tritoniidae				Tochuina		gigantea				(Bergh, 1904)										There are three large tritoniids in the NEP—Tritonia exsulans (formerly Tritonia diomedea or Tritonia tetraquetra), Tochuina gigantea (formerly Tochuina tetraquetra) and the true Tritonia tetraquetra, the latter of which, in the NEP, has so far only been found below 30 meters.
253510	Animalia		Mollusca			Gastropoda	Heterobranchia	Nudipleura	Nudibranchia	Cladobranchia		Tritonioidea	Tritoniidae				Tritonia		exsulans				Bergh, 1894
48827	Animalia		Mollusca			Gastropoda	Heterobranchia	Nudipleura	Nudibranchia	Cladobranchia		Tritonioidea	Tritoniidae				Tritonia		festiva				(Stearns, 1873)
48721	Animalia		Mollusca			Gastropoda	Heterobranchia	Nudipleura	Nudibranchia	Doridina	Doridoidei	Chromodoridoidea	Actinocyclidae				Hallaxa		chani				Gosliner & G. C. Williams, 1975
50094	Animalia		Mollusca			Gastropoda	Heterobranchia	Nudipleura	Nudibranchia	Doridina	Doridoidei	Chromodoridoidea	Cadlinidae				Aldisa		albomarginata				Millen in Millen & Gosliner, 1985
50097	Animalia		Mollusca			Gastropoda	Heterobranchia	Nudipleura	Nudibranchia	Doridina	Doridoidei	Chromodoridoidea	Cadlinidae				Aldisa		cooperi				Robilliard & Baba, 1972
50098	Animalia		Mollusca			Gastropoda	Heterobranchia	Nudipleura	Nudibranchia	Doridina	Doridoidei	Chromodoridoidea	Cadlinidae				Aldisa		sanguinea				(J. G. Cooper, 1863)
50100	Animalia		Mollusca			Gastropoda	Heterobranchia	Nudipleura	Nudibranchia	Doridina	Doridoidei	Chromodoridoidea	Cadlinidae				Aldisa		tara				Millen in Millen & Gosliner, 1985
1118728	Animalia		Mollusca			Gastropoda	Heterobranchia	Nudipleura	Nudibranchia	Doridina	Doridoidei	Chromodoridoidea	Cadlinidae				Cadlina		klasmalmbergi				Korshunova, Fletcher, Picton, Lundin, Kashio, N. Sanamyan, K. Sanamyan, Padula, Schrödl & Martynov, 2020										Currently, there is a sequence of Cadlina klasmalmbergi from Galiano Island in GenBank, but none of the other species that make up this complex—Cadlina jannanicholsae, Cadlina sylviaearleae or Cadlina luteomarginata—are yet represented. Two of the three other species have been sequenced from BC—C. jannanicholsae and C. luteomarginata. The latter has been sequenced from Alaska and Washington and i…
50146	Animalia		Mollusca			Gastropoda	Heterobranchia	Nudipleura	Nudibranchia	Doridina	Doridoidei	Chromodoridoidea	Cadlinidae				Cadlina		luteomarginata				MacFarland, 1966										PMLS records list Cadlina luteomarginata complex due to challenges in field identification. However, here we recognize both Cadlina klasmalmbergi and Cadlina luteomarginata based on other confirmed observations. True Cadlina luteomarginata have more conspicuous tubercles and lack yellow glands near the mantle edge. Cadlina klasmalmbergi is more common in BC than C. luteomarginata.
47400	Animalia		Mollusca			Gastropoda	Heterobranchia	Nudipleura	Nudibranchia	Doridina	Doridoidei	Chromodoridoidea	Cadlinidae				Cadlina		modesta				MacFarland, 1966
508237	Animalia		Mollusca			Gastropoda	Heterobranchia	Nudipleura	Nudibranchia	Doridina	Doridoidei	Doridoidea	Discodorididae				Diaulula		odonoghuei				(Steinberg, 1963)
47505	Animalia		Mollusca			Gastropoda	Heterobranchia	Nudipleura	Nudibranchia	Doridina	Doridoidei	Doridoidea	Discodorididae				Geitodoris		heathi				(MacFarland, 1905)
568137	Animalia		Mollusca			Gastropoda	Heterobranchia	Nudipleura	Nudibranchia	Doridina	Doridoidei	Doridoidea	Discodorididae				Peltodoris		lentiginosa				(Millen, 1982)
48450	Animalia		Mollusca			Gastropoda	Heterobranchia	Nudipleura	Nudibranchia	Doridina	Doridoidei	Doridoidea	Discodorididae				Peltodoris		nobilis				(MacFarland, 1905)
47473	Animalia		Mollusca			Gastropoda	Heterobranchia	Nudipleura	Nudibranchia	Doridina	Doridoidei	Doridoidea	Discodorididae				Rostanga		pulchra				MacFarland, 1905
47469	Animalia		Mollusca			Gastropoda	Heterobranchia	Nudipleura	Nudibranchia	Doridina	Doridoidei	Doridoidea	Dorididae				Doris		montereyensis				J. G. Cooper, 1863
124210	Animalia		Mollusca			Gastropoda	Heterobranchia	Nudipleura	Nudibranchia	Doridina	Doridoidei	Doridoidea	Dorididae				Doris		odhneri				MacFarland, 1966
48981	Animalia		Mollusca			Gastropoda	Heterobranchia	Nudipleura	Nudibranchia	Doridina	Doridoidei	Onchidoridoidea	Aegiridae				Aegires		albopunctatus				MacFarland, 1905
48630	Animalia		Mollusca			Gastropoda	Heterobranchia	Nudipleura	Nudibranchia	Doridina	Doridoidei	Onchidoridoidea	Calycidorididae				Diaphorodoris		lirulatocauda				Millen, 1985
1080211	Animalia		Mollusca			Gastropoda	Heterobranchia	Nudipleura	Nudibranchia	Doridina	Doridoidei	Onchidoridoidea	Onchidorididae				Acanthodoris		atrogriseata				O'Donoghue, 1927
48447	Animalia		Mollusca			Gastropoda	Heterobranchia	Nudipleura	Nudibranchia	Doridina	Doridoidei	Onchidoridoidea	Onchidorididae				Acanthodoris		hudsoni				MacFarland, 1905
47472	Animalia		Mollusca			Gastropoda	Heterobranchia	Nudipleura	Nudibranchia	Doridina	Doridoidei	Onchidoridoidea	Onchidorididae				Acanthodoris		lutea				MacFarland, 1925
47476	Animalia		Mollusca			Gastropoda	Heterobranchia	Nudipleura	Nudibranchia	Doridina	Doridoidei	Onchidoridoidea	Onchidorididae				Acanthodoris		nanaimoensis				O'Donoghue, 1921
508396	Animalia		Mollusca			Gastropoda	Heterobranchia	Nudipleura	Nudibranchia	Doridina	Doridoidei	Onchidoridoidea	Onchidorididae				Adalaria		proxima				(Alder & Hancock, 1854)
508447	Animalia		Mollusca			Gastropoda	Heterobranchia	Nudipleura	Nudibranchia	Doridina	Doridoidei	Onchidoridoidea	Onchidorididae				Knoutsodonta		jannae				(Millen, 1987)
47480	Animalia		Mollusca			Gastropoda	Heterobranchia	Nudipleura	Nudibranchia	Doridina	Doridoidei	Onchidoridoidea	Onchidorididae				Onchidoris		bilamellata				(Linnaeus, 1767)
1348712	Animalia		Mollusca			Gastropoda	Heterobranchia	Nudipleura	Nudibranchia	Doridina	Doridoidei	Onchidoridoidea	Onchidorididae				Onchidoris		evincta				(Millen, 2006)
47508	Animalia		Mollusca			Gastropoda	Heterobranchia	Nudipleura	Nudibranchia	Doridina	Doridoidei	Onchidoridoidea	Onchidorididae				Onchidoris		muricata				(O. F. Müller, 1776)
1187234	Animalia		Mollusca			Gastropoda	Heterobranchia	Nudipleura	Nudibranchia	Doridina	Doridoidei	Polyceroidea	Polyceridae	Polycerinae			Palio		zosterae				(O'Donoghue, 1924)
538830	Animalia		Mollusca			Gastropoda	Heterobranchia	Nudipleura	Nudibranchia	Doridina	Doridoidei	Polyceroidea	Polyceridae	Triophinae			Limacia		cockerelli				(MacFarland, 1905)
1133369	Animalia		Mollusca			Gastropoda	Heterobranchia	Nudipleura	Nudibranchia	Doridina	Doridoidei	Polyceroidea	Polyceridae	Triophinae			Triopha		modesta				Bergh, 1880										Triopha modesta is recognized as a trans-Pacific species, and is most likely to occur off the coast of British Columbia. Triopha catalinae has been determined to be an Eastern Pacific species (but there is overlap). See Jung et al. (2020).
1081461	Animalia		Mollusca			Gastropoda	Heterobranchia	Nudipleura	Pleurobranchida			Pleurobranchoidea	Pleurobranchidae				Berthella		chacei				(J. Q. Burch, 1944)
345356	Animalia		Mollusca			Gastropoda	Heterobranchia		Pteropoda	Euthecosomata		Limacinoidea	Limacinidae				Limacina		helicina				(Phipps, 1774)
55297	Animalia		Mollusca			Gastropoda	Heterobranchia		Pteropoda	Gymnosomata		Clionoidea	Clionidae				Clione		limacina				(Phipps, 1774)
47676	Animalia		Mollusca			Gastropoda	Patellogastropoda					Lottioidea	Acmaeidae				Acmaea		mitra				Rathke, 1833
1240081	Animalia		Mollusca			Gastropoda	Patellogastropoda					Lottioidea	Lepetidae				Lepeta		concentrica				(Middendorff, 1848)										Reported as Cryptobranchia concentrica (Middendorff, 1848), an unaccepted synonym (WoRMS Editorial Board 2021).
1106826	Animalia		Mollusca			Gastropoda	Patellogastropoda					Lottioidea	Lottiidae	Lottiinae	Lottiini		Lottia		digitalis				(Rathke, 1833)
63243	Animalia		Mollusca			Gastropoda	Patellogastropoda					Lottioidea	Lottiidae	Lottiinae	Lottiini		Lottia		pelta				(Rathke, 1833)
339143	Animalia		Mollusca			Gastropoda	Patellogastropoda					Lottioidea	Lottiidae	Lottiinae	Lottiini		Lottia		persona				(Rathke, 1833)
129962	Animalia		Mollusca			Gastropoda	Patellogastropoda					Lottioidea	Lottiidae	Lottiinae	Lottiini		Lottia		scutum				(Rathke, 1833)
64148	Animalia		Mollusca			Gastropoda	Vetigastropoda		Lepetellida			Fissurelloidea	Fissurellidae	Diodorinae			Diodora		aspera				(Rathke, 1833)
904312	Animalia		Mollusca			Gastropoda	Vetigastropoda		Lepetellida			Fissurelloidea	Fissurellidae	Zeidorinae			Puncturella		cucullata				(Gould, 1846)										Accessioned in RBCM collections under the name Cranopsis cucullata, an unaccepted synonym (WoRMS Editorial Board 2021).
56654	Animalia		Mollusca			Gastropoda	Vetigastropoda		Lepetellida			Haliotoidea	Haliotidae				Haliotis		kamtschatkana				Jonas, 1845
121181	Animalia		Mollusca			Gastropoda	Vetigastropoda		Trochida			Trochoidea	Calliostomatidae	Calliostomatinae			Calliostoma		annulatum				(Lightfoot, 1786)
129920	Animalia		Mollusca			Gastropoda	Vetigastropoda		Trochida			Trochoidea	Calliostomatidae	Calliostomatinae			Calliostoma		ligatum				(Gould, 1849)
129922	Animalia		Mollusca			Gastropoda	Vetigastropoda		Trochida			Trochoidea	Margaritidae				Margarites		pupillus				(Gould, 1849)
460365	Animalia		Mollusca			Gastropoda	Vetigastropoda		Trochida			Trochoidea	Tegulidae				Tegula		funebralis				(A. Adams, 1855)
49053	Animalia		Mollusca			Polyplacophora	Neoloricata		Chitonida	Acanthochitonina		Cryptoplacoidea	Acanthochitonidae	Cryptochitoninae			Cryptochiton		stelleri				(Middendorff, 1847)
47632	Animalia		Mollusca			Polyplacophora	Neoloricata		Chitonida	Acanthochitonina		Mopalioidea	Mopaliidae	Mopaliinae			Katharina		tunicata				(Wood, 1815)
117634	Animalia		Mollusca			Polyplacophora	Neoloricata		Chitonida	Acanthochitonina		Mopalioidea	Mopaliidae	Mopaliinae			Mopalia		ciliata				(G. B. Sowerby II, 1840)										Reported as Mopalia kennerleyi Carpenter, 1864, an unaccepted synonym (WoRMS Editorial Board 2022).
51725	Animalia		Mollusca			Polyplacophora	Neoloricata		Chitonida	Acanthochitonina		Mopalioidea	Mopaliidae	Mopaliinae			Mopalia		hindsii				(Reeve, 1847)
51724	Animalia		Mollusca			Polyplacophora	Neoloricata		Chitonida	Acanthochitonina		Mopalioidea	Mopaliidae	Mopaliinae			Mopalia		lignosa				(Gould, 1846)
117633	Animalia		Mollusca			Polyplacophora	Neoloricata		Chitonida	Acanthochitonina		Mopalioidea	Mopaliidae	Mopaliinae			Mopalia		muscosa				(Gould, 1846)
977159	Animalia		Mollusca			Polyplacophora	Neoloricata		Chitonida	Acanthochitonina		Mopalioidea	Mopaliidae	Mopaliinae			Mopalia		phorminx				Berry, 1919
429863	Animalia		Mollusca			Polyplacophora	Neoloricata		Chitonida	Acanthochitonina		Mopalioidea	Mopaliidae	Mopaliinae			Mopalia		sinuata				Carpenter, 1864
364026	Animalia		Mollusca			Polyplacophora	Neoloricata		Chitonida	Acanthochitonina		Mopalioidea	Mopaliidae	Mopaliinae			Mopalia		spectabilis				I. M. Cowan & G. M. Cowan, 1977
339904	Animalia		Mollusca			Polyplacophora	Neoloricata		Chitonida	Acanthochitonina		Mopalioidea	Mopaliidae	Mopaliinae			Mopalia		swanii				Carpenter, 1864
364027	Animalia		Mollusca			Polyplacophora	Neoloricata		Chitonida	Acanthochitonina		Mopalioidea	Mopaliidae	Mopaliinae			Mopalia		vespertina				(Gould, 1852)
547332	Animalia		Mollusca			Polyplacophora	Neoloricata		Chitonida	Acanthochitonina		Mopalioidea	Mopaliidae	Mopaliinae			Placiphorella		rufa				Berry, 1917
55354	Animalia		Mollusca			Polyplacophora	Neoloricata		Chitonida	Acanthochitonina		Mopalioidea	Mopaliidae	Mopaliinae			Placiphorella		velata				(Carpenter MS, Dall, 1879)
71241	Animalia		Mollusca			Polyplacophora	Neoloricata		Chitonida	Acanthochitonina		Mopalioidea	Tonicellidae	Tonicellinae			Cyanoplax		dentiens				(Gould, 1846)
130883	Animalia		Mollusca			Polyplacophora	Neoloricata		Chitonida	Acanthochitonina		Mopalioidea	Tonicellidae	Tonicellinae			Lepidochitona		sp.
194021	Animalia		Mollusca			Polyplacophora	Neoloricata		Chitonida	Acanthochitonina		Mopalioidea	Tonicellidae	Tonicellinae			Tonicella		cf undocaerulea														"Tonicella undocaerulea is restricted to the Sea of Japan region (perhaps the Sea of Okhotsk as well). The species recognized as T. undocearulea in the Eastern Pacific is an undescribed species" (Roger Clark pers. comm. 2020).
498132	Animalia		Mollusca			Polyplacophora	Neoloricata		Chitonida	Acanthochitonina		Mopalioidea	Tonicellidae	Tonicellinae			Tonicella		insignis				(Reeve, 1847)
47425	Animalia		Mollusca			Polyplacophora	Neoloricata		Chitonida	Acanthochitonina		Mopalioidea	Tonicellidae	Tonicellinae			Tonicella		lineata				(Wood, 1815)
131231	Animalia		Mollusca			Polyplacophora	Neoloricata		Chitonida	Chitonina		Chitonoidea	Ischnochitonidae				Lepidozona		interstincta				(Gould, 1852)
117621	Animalia		Mollusca			Polyplacophora	Neoloricata		Chitonida	Chitonina		Chitonoidea	Ischnochitonidae				Lepidozona		mertensii				(Middendorff, 1847)
1174737	Animalia		Mollusca			Polyplacophora	Neoloricata		Chitonida	Chitonina		Chitonoidea	Ischnochitonidae				Tripoplax		trifida				(Carpenter, 1864)										Reported as Lepidozona trifida (Carpenter, 1864), an unaccepted synonym (WoRMS Editorial Board 2022).
957345	Animalia		Mollusca			Scaphopoda			Dentaliida				Rhabdidae				Rhabdus		rectius				(Carpenter, 1864)										Accessioned in collections at the RBCM as Dentalium rectius, an unaccepted synonym (WoRMS Editorial Board 2021).
509660	Animalia		Mollusca			Scaphopoda			Gadilida	Gadilimorpha			Gadilidae				Gadila		aberrans				(Whiteaves, 1887)										Accessioned in collections at the RBCM as Cadulus hepburni, an unaccepted synonym (WoRMS Editorial Board 2021).

## Sheet: Materials
typeStatus	occurrenceID	catalogNumber	occurrenceDetails	occurrenceRemarks	recordNumber	recordedBy	individualID	individualCount	sex	lifeStage	reproductiveCondition	behavior	establishmentMeans	occurrenceStatus	preparations	disposition	otherCatalogNumbers	previousIdentifications	associatedMedia	associatedReferences	associatedOccurrences	associatedSequences	taxonID	scientificNameID	acceptedNameUsageID	parentNameUsageID	originalNameUsageID	nameAccordingToID	namePublishedInID	taxonConceptID	scientificName	acceptedNameUsage	parentNameUsage	originalNameUsage	nameAccordingTo	namePublishedIn	higherClassification	kingdom	phylum	class	order	family	genus	specificEpithet	infraspecificEpithet	taxonRank	verbatimTaxonRank	scientificNameAuthorship	vernacularName
	imerss.org:PMLS:3					Andy Lamb								PRESENT				Mytilus edulis complex					iNaturalist:1108240								Mytilus edulis							Animalia	Mollusca	Bivalvia	Mytilida	Mytilidae	Mytilus	edulis		species
	imerss.org:PMLS:4					Andy Lamb								PRESENT				Peltodoris nobilis					iNaturalist:48450								Peltodoris nobilis							Animalia	Mollusca	Gastropoda	Nudibranchia	Discodorididae	Peltodoris	nobilis		species		(MacFarland, 1905)
	imerss.org:PMLS:5					Andy Lamb								PRESENT				Doris montereyensis					iNaturalist:47469								Doris montereyensis							Animalia	Mollusca	Gastropoda	Nudibranchia	Dorididae	Doris	montereyensis		species		J. G. Cooper, 1863
	imerss.org:PMLS:20					Andy Lamb								PRESENT				Chlamys sp.					iNaturalist:84497								Chlamys							Animalia	Mollusca	Bivalvia	Pectinida	Pectinidae	Chlamys			genus
	imerss.org:PMLS:21					Andy Lamb								PRESENT				Crassadoma gigantea					iNaturalist:54526								Crassadoma gigantea							Animalia	Mollusca	Bivalvia	Pectinida	Pectinidae	Crassadoma	gigantea		species		(J.E. Gray, 1825)
	imerss.org:PMLS:22					Andy Lamb								PRESENT				Diodora aspera					iNaturalist:64148								Diodora aspera							Animalia	Mollusca	Gastropoda	Lepetellida	Fissurellidae	Diodora	aspera		species		(Rathke, 1833)
	imerss.org:PMLS:23					Andy Lamb								PRESENT				Nucella lamellosa					iNaturalist:117641								Nucella lamellosa							Animalia	Mollusca	Gastropoda	Neogastropoda	Muricidae	Nucella	lamellosa		species		(Gmelin, 1791)
	imerss.org:PMLS:24					Andy Lamb								PRESENT				Peltodoris nobilis					iNaturalist:48450								Peltodoris nobilis							Animalia	Mollusca	Gastropoda	Nudibranchia	Discodorididae	Peltodoris	nobilis		species		(MacFarland, 1905)
	imerss.org:PMLS:25					Andy Lamb								PRESENT				Doris montereyensis					iNaturalist:47469								Doris montereyensis							Animalia	Mollusca	Gastropoda	Nudibranchia	Dorididae	Doris	montereyensis		species		J. G. Cooper, 1863
	imerss.org:PMLS:26					Andy Lamb								PRESENT				Dendronotus iris					iNaturalist:47706								Dendronotus iris							Animalia	Mollusca	Gastropoda	Nudibranchia	Dendronotidae	Dendronotus	iris		species		J. G. Cooper, 1863
	imerss.org:PMLS:27					Andy Lamb								PRESENT				Dirona albolineata					iNaturalist:47477								Dirona albolineata							Animalia	Mollusca	Gastropoda	Nudibranchia	Dironidae	Dirona	albolineata		species		MacFarland, 1905
	imerss.org:PMLS:28					Andy Lamb								PRESENT				Hermissenda crassicornis					iNaturalist:495552								Hermissenda crassicornis							Animalia	Mollusca	Gastropoda	Nudibranchia	Myrrhinidae	Hermissenda	crassicornis		species		(Eschscholtz, 1831)
	imerss.org:PMLS:68					Andy Lamb								PRESENT				Mopalia sp.					iNaturalist:47630								Mopalia							Animalia	Mollusca	Polyplacophora	Chitonida	Mopaliidae	Mopalia			genus
	imerss.org:PMLS:69					Andy Lamb								PRESENT				Crassadoma gigantea					iNaturalist:54526								Crassadoma gigantea							Animalia	Mollusca	Bivalvia	Pectinida	Pectinidae	Crassadoma	gigantea		species		(J.E. Gray, 1825)
	imerss.org:PMLS:70					Andy Lamb								PRESENT				Entodesma navicula					iNaturalist:339164								Entodesma navicula							Animalia	Mollusca	Bivalvia		Lyonsiidae	Entodesma	navicula		species		(Adams & Reeve, 1850)
	imerss.org:PMLS:71					Andy Lamb								PRESENT				Peltodoris nobilis					iNaturalist:48450								Peltodoris nobilis							Animalia	Mollusca	Gastropoda	Nudibranchia	Discodorididae	Peltodoris	nobilis		species		(MacFarland, 1905)
	imerss.org:PMLS:72					Andy Lamb								PRESENT				Doris montereyensis					iNaturalist:47469								Doris montereyensis							Animalia	Mollusca	Gastropoda	Nudibranchia	Dorididae	Doris	montereyensis		species		J. G. Cooper, 1863
	imerss.org:PMLS:73					Andy Lamb								PRESENT				Diaulula odonoghuei					iNaturalist:508237								Diaulula odonoghuei							Animalia	Mollusca	Gastropoda	Nudibranchia	Discodorididae	Diaulula	odonoghuei		species		(Steinberg, 1963)
	imerss.org:PMLS:74					Andy Lamb								PRESENT				Dendronotus albus					iNaturalist:47773								Dendronotus albus							Animalia	Mollusca	Gastropoda	Nudibranchia	Dendronotidae	Dendronotus	albus		species		MacFarland, 1966
	imerss.org:PMLS:75					Andy Lamb								PRESENT				Aeolidia papillosa					iNaturalist:498116								Aeolidia papillosa							Animalia	Mollusca	Gastropoda	Nudibranchia	Aeolidiidae	Aeolidia	papillosa		species		(Linnaeus, 1761)
	imerss.org:PMLS:106					Andy Lamb								PRESENT				Dirona albolineata					iNaturalist:47477								Dirona albolineata							Animalia	Mollusca	Gastropoda	Nudibranchia	Dironidae	Dirona	albolineata		species		MacFarland, 1905
	imerss.org:PMLS:107					Andy Lamb								PRESENT				Chlamys sp.					iNaturalist:84497								Chlamys							Animalia	Mollusca	Bivalvia	Pectinida	Pectinidae	Chlamys			genus
	imerss.org:PMLS:151					Andy Lamb								PRESENT				Tonicella lineata					iNaturalist:47425								Tonicella lineata							Animalia	Mollusca	Polyplacophora	Chitonida	Tonicellidae	Tonicella	lineata		species		(Wood, 1815)
	imerss.org:PMLS:152					Andy Lamb								PRESENT				Mopalia sp.					iNaturalist:47630								Mopalia							Animalia	Mollusca	Polyplacophora	Chitonida	Mopaliidae	Mopalia			genus
	imerss.org:PMLS:153					Andy Lamb								PRESENT				Cryptochiton stelleri					iNaturalist:49053								Cryptochiton stelleri							Animalia	Mollusca	Polyplacophora	Chitonida	Acanthochitonidae	Cryptochiton	stelleri		species		(Middendorff, 1847)
	imerss.org:PMLS:154					Andy Lamb								PRESENT				Chlamys sp.					iNaturalist:84497								Chlamys							Animalia	Mollusca	Bivalvia	Pectinida	Pectinidae	Chlamys			genus
	imerss.org:PMLS:155					Andy Lamb								PRESENT				Pododesmus macrochisma					iNaturalist:68652								Pododesmus macrochisma							Animalia	Mollusca	Bivalvia	Pectinida	Anomiidae	Pododesmus	macrochisma		species		(Deshayes, 1839)
	imerss.org:PMLS:156					Andy Lamb								PRESENT				Nucella lamellosa					iNaturalist:117641								Nucella lamellosa							Animalia	Mollusca	Gastropoda	Neogastropoda	Muricidae	Nucella	lamellosa		species		(Gmelin, 1791)
	imerss.org:PMLS:157					Andy Lamb								PRESENT				Fusitriton oregonensis					iNaturalist:448389								Fusitriton oregonensis							Animalia	Mollusca	Gastropoda	Littorinimorpha	Cymatiidae	Fusitriton	oregonensis		species		(Redfield, 1846)
	imerss.org:PMLS:158					Andy Lamb								PRESENT				Peltodoris nobilis					iNaturalist:48450								Peltodoris nobilis							Animalia	Mollusca	Gastropoda	Nudibranchia	Discodorididae	Peltodoris	nobilis		species		(MacFarland, 1905)
	imerss.org:PMLS:159					Andy Lamb								PRESENT				Doris montereyensis					iNaturalist:47469								Doris montereyensis							Animalia	Mollusca	Gastropoda	Nudibranchia	Dorididae	Doris	montereyensis		species		J. G. Cooper, 1863
	imerss.org:PMLS:160					Andy Lamb								PRESENT				Doris odhneri					iNaturalist:124210								Doris odhneri							Animalia	Mollusca	Gastropoda	Nudibranchia	Dorididae	Doris	odhneri		species		MacFarland, 1966
	imerss.org:PMLS:161					Andy Lamb		1						PRESENT				Tochuina gigantea					iNaturalist:873733								Tochuina gigantea							Animalia	Mollusca	Gastropoda	Nudibranchia	Tritoniidae	Tochuina	gigantea		species		(Bergh, 1904)
	imerss.org:PMLS:162					Andy Lamb								PRESENT				Dirona albolineata					iNaturalist:47477								Dirona albolineata							Animalia	Mollusca	Gastropoda	Nudibranchia	Dironidae	Dirona	albolineata		species		MacFarland, 1905
	imerss.org:PMLS:163					Andy Lamb								PRESENT				Hermissenda crassicornis					iNaturalist:495552								Hermissenda crassicornis							Animalia	Mollusca	Gastropoda	Nudibranchia	Myrrhinidae	Hermissenda	crassicornis		species		(Eschscholtz, 1831)
	imerss.org:PMLS:199					Andy Lamb								PRESENT				Dendronotus iris					iNaturalist:47706								Dendronotus iris							Animalia	Mollusca	Gastropoda	Nudibranchia	Dendronotidae	Dendronotus	iris		species		J. G. Cooper, 1863
	imerss.org:PMLS:200					Andy Lamb								PRESENT				Dirona pellucida					iNaturalist:50447								Dirona pellucida							Animalia	Mollusca	Gastropoda	Nudibranchia	Dironidae	Dirona	pellucida		species		Volodchenko, 1941
	imerss.org:PMLS:247					Andy Lamb								PRESENT				Tonicella lineata					iNaturalist:47425								Tonicella lineata							Animalia	Mollusca	Polyplacophora	Chitonida	Tonicellidae	Tonicella	lineata		species		(Wood, 1815)
	imerss.org:PMLS:248					Andy Lamb								PRESENT				Mopalia sp.					iNaturalist:47630								Mopalia							Animalia	Mollusca	Polyplacophora	Chitonida	Mopaliidae	Mopalia			genus
	imerss.org:PMLS:249					Andy Lamb								PRESENT				Cryptochiton stelleri					iNaturalist:49053								Cryptochiton stelleri							Animalia	Mollusca	Polyplacophora	Chitonida	Acanthochitonidae	Cryptochiton	stelleri		species		(Middendorff, 1847)
	imerss.org:PMLS:250					Andy Lamb								PRESENT				Chlamys sp.					iNaturalist:84497								Chlamys							Animalia	Mollusca	Bivalvia	Pectinida	Pectinidae	Chlamys			genus
	imerss.org:PMLS:251					Andy Lamb								PRESENT				Crassadoma gigantea					iNaturalist:54526								Crassadoma gigantea							Animalia	Mollusca	Bivalvia	Pectinida	Pectinidae	Crassadoma	gigantea		species		(J.E. Gray, 1825)
	imerss.org:PMLS:252					Andy Lamb								PRESENT				Entodesma navicula					iNaturalist:339164								Entodesma navicula							Animalia	Mollusca	Bivalvia		Lyonsiidae	Entodesma	navicula		species		(Adams & Reeve, 1850)
	imerss.org:PMLS:253					Andy Lamb								PRESENT				Acmaea mitra					iNaturalist:47676								Acmaea mitra							Animalia	Mollusca	Gastropoda		Acmaeidae	Acmaea	mitra		species		Rathke, 1833
	imerss.org:PMLS:254			Count: many		Andy Lamb								PRESENT				Haliotis kamtschatkana					iNaturalist:56654								Haliotis kamtschatkana							Animalia	Mollusca	Gastropoda	Lepetellida	Haliotidae	Haliotis	kamtschatkana		species		Jonas, 1845
	imerss.org:PMLS:255					Andy Lamb								PRESENT				Ceratostoma foliatum					iNaturalist:116687								Ceratostoma foliatum							Animalia	Mollusca	Gastropoda	Neogastropoda	Muricidae	Ceratostoma	foliatum		species		(Gmelin, 1791)
	imerss.org:PMLS:256					Andy Lamb								PRESENT				Amphissa columbiana					iNaturalist:117643								Amphissa columbiana							Animalia	Mollusca	Gastropoda	Neogastropoda	Columbellidae	Amphissa	columbiana		species		Dall, 1916
	imerss.org:PMLS:257					Andy Lamb								PRESENT				Geitodoris heathi					iNaturalist:47505								Geitodoris heathi							Animalia	Mollusca	Gastropoda	Nudibranchia	Discodorididae	Geitodoris	heathi		species		(MacFarland, 1905)
	imerss.org:PMLS:258					Andy Lamb								PRESENT				Aldisa cooperi					iNaturalist:50097								Aldisa cooperi							Animalia	Mollusca	Gastropoda	Nudibranchia	Cadlinidae	Aldisa	cooperi		species		Robilliard & Baba, 1972
	imerss.org:PMLS:303					Andy Lamb								PRESENT				Tonicella lineata					iNaturalist:47425								Tonicella lineata							Animalia	Mollusca	Polyplacophora	Chitonida	Tonicellidae	Tonicella	lineata		species		(Wood, 1815)
	imerss.org:PMLS:304					Andy Lamb								PRESENT				Mopalia sp.					iNaturalist:47630								Mopalia							Animalia	Mollusca	Polyplacophora	Chitonida	Mopaliidae	Mopalia			genus
	imerss.org:PMLS:305					Andy Lamb								PRESENT				Chlamys sp.					iNaturalist:84497								Chlamys							Animalia	Mollusca	Bivalvia	Pectinida	Pectinidae	Chlamys			genus
	imerss.org:PMLS:306					Andy Lamb								PRESENT				Crassadoma gigantea					iNaturalist:54526								Crassadoma gigantea							Animalia	Mollusca	Bivalvia	Pectinida	Pectinidae	Crassadoma	gigantea		species		(J.E. Gray, 1825)
	imerss.org:PMLS:307					Andy Lamb								PRESENT				Mytilimeria nuttalli					iNaturalist:873896								Mytilimeria nuttalli							Animalia	Mollusca	Bivalvia		Lyonsiidae	Mytilimeria	nuttalli		species		Conrad, 1837
	imerss.org:PMLS:308					Andy Lamb								PRESENT				Diodora aspera					iNaturalist:64148								Diodora aspera							Animalia	Mollusca	Gastropoda	Lepetellida	Fissurellidae	Diodora	aspera		species		(Rathke, 1833)
	imerss.org:PMLS:309					Andy Lamb								PRESENT				Ceratostoma foliatum					iNaturalist:116687								Ceratostoma foliatum							Animalia	Mollusca	Gastropoda	Neogastropoda	Muricidae	Ceratostoma	foliatum		species		(Gmelin, 1791)
	imerss.org:PMLS:310					Andy Lamb								PRESENT				Calliostoma ligatum					iNaturalist:129920								Calliostoma ligatum							Animalia	Mollusca	Gastropoda	Trochida	Calliostomatidae	Calliostoma	ligatum		species		(Gould, 1849)
	imerss.org:PMLS:311					Andy Lamb								PRESENT				Peltodoris nobilis					iNaturalist:48450								Peltodoris nobilis							Animalia	Mollusca	Gastropoda	Nudibranchia	Discodorididae	Peltodoris	nobilis		species		(MacFarland, 1905)
	imerss.org:PMLS:312					Andy Lamb								PRESENT				Doris montereyensis					iNaturalist:47469								Doris montereyensis							Animalia	Mollusca	Gastropoda	Nudibranchia	Dorididae	Doris	montereyensis		species		J. G. Cooper, 1863
	imerss.org:PMLS:313					Andy Lamb								PRESENT				Cadlina luteomarginata complex					iNaturalist:50146								Cadlina luteomarginata							Animalia	Mollusca	Gastropoda	Nudibranchia	Cadlinidae	Cadlina	luteomarginata		species		MacFarland, 1966
	imerss.org:PMLS:314					Andy Lamb								PRESENT				Aldisa cooperi					iNaturalist:50097								Aldisa cooperi							Animalia	Mollusca	Gastropoda	Nudibranchia	Cadlinidae	Aldisa	cooperi		species		Robilliard & Baba, 1972
	imerss.org:PMLS:400					Andy Lamb								PRESENT				Tonicella lineata					iNaturalist:47425								Tonicella lineata							Animalia	Mollusca	Polyplacophora	Chitonida	Tonicellidae	Tonicella	lineata		species		(Wood, 1815)
	imerss.org:PMLS:401					Andy Lamb								PRESENT				Mopalia sp.					iNaturalist:47630								Mopalia							Animalia	Mollusca	Polyplacophora	Chitonida	Mopaliidae	Mopalia			genus
	imerss.org:PMLS:402			Count: some		Andy Lamb								PRESENT				Cryptochiton stelleri					iNaturalist:49053								Cryptochiton stelleri							Animalia	Mollusca	Polyplacophora	Chitonida	Acanthochitonidae	Cryptochiton	stelleri		species		(Middendorff, 1847)
	imerss.org:PMLS:403					Andy Lamb								PRESENT				Chlamys sp.					iNaturalist:84497								Chlamys							Animalia	Mollusca	Bivalvia	Pectinida	Pectinidae	Chlamys			genus
	imerss.org:PMLS:404			Count: some		Andy Lamb								PRESENT				Crassadoma gigantea					iNaturalist:54526								Crassadoma gigantea							Animalia	Mollusca	Bivalvia	Pectinida	Pectinidae	Crassadoma	gigantea		species		(J.E. Gray, 1825)
	imerss.org:PMLS:405					Andy Lamb								PRESENT				Pododesmus macrochisma					iNaturalist:68652								Pododesmus macrochisma							Animalia	Mollusca	Bivalvia	Pectinida	Anomiidae	Pododesmus	macrochisma		species		(Deshayes, 1839)
	imerss.org:PMLS:406			Count: few		Andy Lamb								PRESENT				Entodesma navicula					iNaturalist:339164								Entodesma navicula							Animalia	Mollusca	Bivalvia		Lyonsiidae	Entodesma	navicula		species		(Adams & Reeve, 1850)
	imerss.org:PMLS:407			Count: some		Andy Lamb								PRESENT				Diodora aspera					iNaturalist:64148								Diodora aspera							Animalia	Mollusca	Gastropoda	Lepetellida	Fissurellidae	Diodora	aspera		species		(Rathke, 1833)
	imerss.org:PMLS:408					Andy Lamb		1						PRESENT				Haliotis kamtschatkana					iNaturalist:56654								Haliotis kamtschatkana							Animalia	Mollusca	Gastropoda	Lepetellida	Haliotidae	Haliotis	kamtschatkana		species		Jonas, 1845
	imerss.org:PMLS:409					Andy Lamb								PRESENT				Ceratostoma foliatum					iNaturalist:116687								Ceratostoma foliatum							Animalia	Mollusca	Gastropoda	Neogastropoda	Muricidae	Ceratostoma	foliatum		species		(Gmelin, 1791)
	imerss.org:PMLS:410			Count: abundant		Andy Lamb								PRESENT				Amphissa columbiana					iNaturalist:117643								Amphissa columbiana							Animalia	Mollusca	Gastropoda	Neogastropoda	Columbellidae	Amphissa	columbiana		species		Dall, 1916
	imerss.org:PMLS:411			Count: abundant		Andy Lamb								PRESENT				Calliostoma ligatum					iNaturalist:129920								Calliostoma ligatum							Animalia	Mollusca	Gastropoda	Trochida	Calliostomatidae	Calliostoma	ligatum		species		(Gould, 1849)
	imerss.org:PMLS:412					Andy Lamb								PRESENT				Trichotropis cancellata					iNaturalist:447177								Trichotropis cancellata							Animalia	Mollusca	Gastropoda	Littorinimorpha	Capulidae	Trichotropis	cancellata		species		Hinds, 1843
	imerss.org:PMLS:413			Count: few		Andy Lamb								PRESENT				Peltodoris nobilis					iNaturalist:48450								Peltodoris nobilis							Animalia	Mollusca	Gastropoda	Nudibranchia	Discodorididae	Peltodoris	nobilis		species		(MacFarland, 1905)
	imerss.org:PMLS:414			Count: few		Andy Lamb								PRESENT				Doris odhneri					iNaturalist:124210								Doris odhneri							Animalia	Mollusca	Gastropoda	Nudibranchia	Dorididae	Doris	odhneri		species		MacFarland, 1966
	imerss.org:PMLS:415			Count: few		Andy Lamb								PRESENT				Cadlina luteomarginata complex					iNaturalist:50146								Cadlina luteomarginata							Animalia	Mollusca	Gastropoda	Nudibranchia	Cadlinidae	Cadlina	luteomarginata		species		MacFarland, 1966
	imerss.org:PMLS:416					Andy Lamb		1						PRESENT				Triopha modesta					iNaturalist:1133369								Triopha modesta							Animalia	Mollusca	Gastropoda	Nudibranchia	Polyceridae	Triopha	modesta		species		Bergh, 1880
	imerss.org:PMLS:417			Count: some		Andy Lamb								PRESENT				Dendronotus albus					iNaturalist:47773								Dendronotus albus							Animalia	Mollusca	Gastropoda	Nudibranchia	Dendronotidae	Dendronotus	albus		species		MacFarland, 1966
	imerss.org:PMLS:418			Count: few		Andy Lamb								PRESENT				Hermissenda crassicornis					iNaturalist:495552								Hermissenda crassicornis							Animalia	Mollusca	Gastropoda	Nudibranchia	Myrrhinidae	Hermissenda	crassicornis		species		(Eschscholtz, 1831)
	imerss.org:PMLS:419			Count: abundant		Andy Lamb								PRESENT				Himatina trophina					iNaturalist:633561								Himatina trophina							Animalia	Mollusca	Gastropoda	Nudibranchia	Coryphellidae	Himatina	trophina		species		(Bergh, 1890)
	imerss.org:PMLS:420			Count: abundant		Andy Lamb								PRESENT				Orienthella trilineata					iNaturalist:764704								Orienthella trilineata							Animalia	Mollusca	Gastropoda	Nudibranchia	Coryphellidae	Orienthella	trilineata		species		(O'Donoghue, 1921)
	imerss.org:PMLS:492					Andy Lamb								PRESENT				Tonicella lineata					iNaturalist:47425								Tonicella lineata							Animalia	Mollusca	Polyplacophora	Chitonida	Tonicellidae	Tonicella	lineata		species		(Wood, 1815)
	imerss.org:PMLS:493					Andy Lamb								PRESENT				Mopalia sp.					iNaturalist:47630								Mopalia							Animalia	Mollusca	Polyplacophora	Chitonida	Mopaliidae	Mopalia			genus
	imerss.org:PMLS:494					Andy Lamb								PRESENT				Cryptochiton stelleri					iNaturalist:49053								Cryptochiton stelleri							Animalia	Mollusca	Polyplacophora	Chitonida	Acanthochitonidae	Cryptochiton	stelleri		species		(Middendorff, 1847)
	imerss.org:PMLS:495					Andy Lamb								PRESENT				Chlamys sp.					iNaturalist:84497								Chlamys							Animalia	Mollusca	Bivalvia	Pectinida	Pectinidae	Chlamys			genus
	imerss.org:PMLS:496					Andy Lamb								PRESENT				Crassadoma gigantea					iNaturalist:54526								Crassadoma gigantea							Animalia	Mollusca	Bivalvia	Pectinida	Pectinidae	Crassadoma	gigantea		species		(J.E. Gray, 1825)
	imerss.org:PMLS:497					Andy Lamb								PRESENT				Pododesmus macrochisma					iNaturalist:68652								Pododesmus macrochisma							Animalia	Mollusca	Bivalvia	Pectinida	Anomiidae	Pododesmus	macrochisma		species		(Deshayes, 1839)
	imerss.org:PMLS:498					Andy Lamb								PRESENT				Entodesma navicula					iNaturalist:339164								Entodesma navicula							Animalia	Mollusca	Bivalvia		Lyonsiidae	Entodesma	navicula		species		(Adams & Reeve, 1850)
	imerss.org:PMLS:499					Andy Lamb		1						PRESENT				Haliotis kamtschatkana					iNaturalist:56654								Haliotis kamtschatkana							Animalia	Mollusca	Gastropoda	Lepetellida	Haliotidae	Haliotis	kamtschatkana		species		Jonas, 1845
	imerss.org:PMLS:500			Count: abundant		Andy Lamb								PRESENT				Nucella lamellosa					iNaturalist:117641								Nucella lamellosa							Animalia	Mollusca	Gastropoda	Neogastropoda	Muricidae	Nucella	lamellosa		species		(Gmelin, 1791)
	imerss.org:PMLS:501			Count: abundant		Andy Lamb								PRESENT				Ceratostoma foliatum					iNaturalist:116687								Ceratostoma foliatum							Animalia	Mollusca	Gastropoda	Neogastropoda	Muricidae	Ceratostoma	foliatum		species		(Gmelin, 1791)
	imerss.org:PMLS:502			Count: many		Andy Lamb								PRESENT				Lirabuccinum dirum					iNaturalist:117642								Lirabuccinum dirum							Animalia	Mollusca	Gastropoda	Neogastropoda	Tudiclidae	Lirabuccinum	dirum		species		(Reeve, 1846)
	imerss.org:PMLS:503					Andy Lamb		1						PRESENT				Scabrotrophon maltzani					iNaturalist:500269								Scabrotrophon maltzani							Animalia	Mollusca	Gastropoda	Neogastropoda	Muricidae	Scabrotrophon	maltzani		species		(Kobelt, 1878)
	imerss.org:PMLS:504					Andy Lamb								PRESENT				Vermetus compactus					iNaturalist:883089								Petaloconchus compactus							Animalia	Mollusca	Gastropoda	Littorinimorpha	Vermetidae	Petaloconchus	compactus		species
	imerss.org:PMLS:505					Andy Lamb								PRESENT				Doris montereyensis					iNaturalist:47469								Doris montereyensis							Animalia	Mollusca	Gastropoda	Nudibranchia	Dorididae	Doris	montereyensis		species		J. G. Cooper, 1863
	imerss.org:PMLS:506					Andy Lamb		1						PRESENT				Diaulula odonoghuei					iNaturalist:508237								Diaulula odonoghuei							Animalia	Mollusca	Gastropoda	Nudibranchia	Discodorididae	Diaulula	odonoghuei		species		(Steinberg, 1963)
	imerss.org:PMLS:507					Andy Lamb								PRESENT				Cadlina luteomarginata complex					iNaturalist:50146								Cadlina luteomarginata							Animalia	Mollusca	Gastropoda	Nudibranchia	Cadlinidae	Cadlina	luteomarginata		species		MacFarland, 1966
	imerss.org:PMLS:508					Andy Lamb		1						PRESENT				Rostanga pulchra					iNaturalist:47473								Rostanga pulchra							Animalia	Mollusca	Gastropoda	Nudibranchia	Discodorididae	Rostanga	pulchra		species		MacFarland, 1905
	imerss.org:PMLS:509					Andy Lamb		3						PRESENT				Limacia cockerelli					iNaturalist:538830								Limacia cockerelli							Animalia	Mollusca	Gastropoda	Nudibranchia	Polyceridae	Limacia	cockerelli		species		(MacFarland, 1905)
	imerss.org:PMLS:510					Andy Lamb		1						PRESENT				Tritonia festiva					iNaturalist:48827								Tritonia festiva							Animalia	Mollusca	Gastropoda	Nudibranchia	Tritoniidae	Tritonia	festiva		species		(Stearns, 1873)
	imerss.org:PMLS:511					Andy Lamb		1						PRESENT				Dendronotus rufus					iNaturalist:50393								Dendronotus rufus							Animalia	Mollusca	Gastropoda	Nudibranchia	Dendronotidae	Dendronotus	rufus		species		O'Donoghue, 1921
	imerss.org:PMLS:512			Count: abundant		Andy Lamb								PRESENT				Antiopella fusca					iNaturalist:886884								Antiopella fusca							Animalia	Mollusca	Gastropoda	Nudibranchia	Janolidae	Antiopella	fusca		species		(O'Donoghue, 1924)
	imerss.org:PMLS:513			Count: abundant		Andy Lamb								PRESENT				Himatina trophina					iNaturalist:633561								Himatina trophina							Animalia	Mollusca	Gastropoda	Nudibranchia	Coryphellidae	Himatina	trophina		species		(Bergh, 1890)
	imerss.org:PMLS:514			Count: abundant		Andy Lamb								PRESENT				Orienthella trilineata					iNaturalist:764704								Orienthella trilineata							Animalia	Mollusca	Gastropoda	Nudibranchia	Coryphellidae	Orienthella	trilineata		species		(O'Donoghue, 1921)
	imerss.org:PMLS:569			Count: few		Andy Lamb								PRESENT				Mopalia sp.					iNaturalist:47630								Mopalia							Animalia	Mollusca	Polyplacophora	Chitonida	Mopaliidae	Mopalia			genus
	imerss.org:PMLS:570					Andy Lamb								PRESENT				Cryptochiton stelleri					iNaturalist:49053								Cryptochiton stelleri							Animalia	Mollusca	Polyplacophora	Chitonida	Acanthochitonidae	Cryptochiton	stelleri		species		(Middendorff, 1847)
	imerss.org:PMLS:571			Count: some		Andy Lamb								PRESENT				Chlamys sp.					iNaturalist:84497								Chlamys							Animalia	Mollusca	Bivalvia	Pectinida	Pectinidae	Chlamys			genus
	imerss.org:PMLS:572			Count: some		Andy Lamb								PRESENT				Crassadoma gigantea					iNaturalist:54526								Crassadoma gigantea							Animalia	Mollusca	Bivalvia	Pectinida	Pectinidae	Crassadoma	gigantea		species		(J.E. Gray, 1825)
	imerss.org:PMLS:573			Count: some		Andy Lamb								PRESENT				Entodesma navicula					iNaturalist:339164								Entodesma navicula							Animalia	Mollusca	Bivalvia		Lyonsiidae	Entodesma	navicula		species		(Adams & Reeve, 1850)
	imerss.org:PMLS:574			Count: some		Andy Lamb								PRESENT				Phyllaplysia taylori					iNaturalist:49864								Phyllaplysia taylori							Animalia	Mollusca	Gastropoda	Aplysiida	Aplysiidae	Phyllaplysia	taylori		species		Dall, 1900
	imerss.org:PMLS:575					Andy Lamb		1						PRESENT				Doris montereyensis					iNaturalist:47469								Doris montereyensis							Animalia	Mollusca	Gastropoda	Nudibranchia	Dorididae	Doris	montereyensis		species		J. G. Cooper, 1863
	imerss.org:PMLS:576			Count: few		Andy Lamb								PRESENT				Cadlina luteomarginata complex					iNaturalist:50146								Cadlina luteomarginata							Animalia	Mollusca	Gastropoda	Nudibranchia	Cadlinidae	Cadlina	luteomarginata		species		MacFarland, 1966
	imerss.org:PMLS:577					Andy Lamb								PRESENT				Dendronotus iris					iNaturalist:47706								Dendronotus iris							Animalia	Mollusca	Gastropoda	Nudibranchia	Dendronotidae	Dendronotus	iris		species		J. G. Cooper, 1863
	imerss.org:PMLS:578			Count: some		Andy Lamb								PRESENT				Dirona albolineata					iNaturalist:47477								Dirona albolineata							Animalia	Mollusca	Gastropoda	Nudibranchia	Dironidae	Dirona	albolineata		species		MacFarland, 1905
	imerss.org:PMLS:640					Charlie Gibbs								PRESENT				Tonicella lineata					iNaturalist:47425								Tonicella lineata							Animalia	Mollusca	Polyplacophora	Chitonida	Tonicellidae	Tonicella	lineata		species		(Wood, 1815)
	imerss.org:PMLS:641					Charlie Gibbs								PRESENT				Mytilus edulis complex					iNaturalist:1108240								Mytilus edulis							Animalia	Mollusca	Bivalvia	Mytilida	Mytilidae	Mytilus	edulis		species
	imerss.org:PMLS:642					Charlie Gibbs								PRESENT				Chlamys sp.					iNaturalist:84497								Chlamys							Animalia	Mollusca	Bivalvia	Pectinida	Pectinidae	Chlamys			genus
	imerss.org:PMLS:643					Charlie Gibbs								PRESENT				Crassadoma gigantea					iNaturalist:54526								Crassadoma gigantea							Animalia	Mollusca	Bivalvia	Pectinida	Pectinidae	Crassadoma	gigantea		species		(J.E. Gray, 1825)
	imerss.org:PMLS:644					Charlie Gibbs								PRESENT				Pododesmus macrochisma					iNaturalist:68652								Pododesmus macrochisma							Animalia	Mollusca	Bivalvia	Pectinida	Anomiidae	Pododesmus	macrochisma		species		(Deshayes, 1839)
	imerss.org:PMLS:645					Charlie Gibbs								PRESENT				Tresus capax					iNaturalist:126927								Tresus capax							Animalia	Mollusca	Bivalvia	Venerida	Mactridae	Tresus	capax		species		(Gould, 1850)
	imerss.org:PMLS:646					Charlie Gibbs								PRESENT				Calliostoma annulatum					iNaturalist:121181								Calliostoma annulatum							Animalia	Mollusca	Gastropoda	Trochida	Calliostomatidae	Calliostoma	annulatum		species		(Lightfoot, 1786)
	imerss.org:PMLS:647					Charlie Gibbs								PRESENT				Doris montereyensis					iNaturalist:47469								Doris montereyensis							Animalia	Mollusca	Gastropoda	Nudibranchia	Dorididae	Doris	montereyensis		species		J. G. Cooper, 1863
	imerss.org:PMLS:648					Charlie Gibbs								PRESENT				Doris odhneri					iNaturalist:124210								Doris odhneri							Animalia	Mollusca	Gastropoda	Nudibranchia	Dorididae	Doris	odhneri		species		MacFarland, 1966
	imerss.org:PMLS:649					Charlie Gibbs								PRESENT				Cadlina luteomarginata complex					iNaturalist:50146								Cadlina luteomarginata							Animalia	Mollusca	Gastropoda	Nudibranchia	Cadlinidae	Cadlina	luteomarginata		species		MacFarland, 1966
	imerss.org:PMLS:650					Charlie Gibbs								PRESENT				Dendronotus iris					iNaturalist:47706								Dendronotus iris							Animalia	Mollusca	Gastropoda	Nudibranchia	Dendronotidae	Dendronotus	iris		species		J. G. Cooper, 1863
	imerss.org:PMLS:651					Charlie Gibbs								PRESENT				Dirona albolineata					iNaturalist:47477								Dirona albolineata							Animalia	Mollusca	Gastropoda	Nudibranchia	Dironidae	Dirona	albolineata		species		MacFarland, 1905
	imerss.org:PMLS:652					Charlie Gibbs								PRESENT				Himatina trophina					iNaturalist:633561								Himatina trophina							Animalia	Mollusca	Gastropoda	Nudibranchia	Coryphellidae	Himatina	trophina		species		(Bergh, 1890)
	imerss.org:PMLS:653					Charlie Gibbs								PRESENT				Enteroctopus dofleini					iNaturalist:48863								Enteroctopus dofleini							Animalia	Mollusca	Cephalopoda	Octopoda	Enteroctopodidae	Enteroctopus	dofleini		species		(Wülker, 1910)
	imerss.org:PMLS:713					Andy Lamb		2						PRESENT				Katharina tunicata					iNaturalist:47632								Katharina tunicata							Animalia	Mollusca	Polyplacophora	Chitonida	Mopaliidae	Katharina	tunicata		species		(Wood, 1815)
	imerss.org:PMLS:714			Count: some		Andy Lamb								PRESENT				Calliostoma ligatum					iNaturalist:129920								Calliostoma ligatum							Animalia	Mollusca	Gastropoda	Trochida	Calliostomatidae	Calliostoma	ligatum		species		(Gould, 1849)
	imerss.org:PMLS:715			Count: few		Andy Lamb								PRESENT				Ceratostoma foliatum					iNaturalist:116687								Ceratostoma foliatum							Animalia	Mollusca	Gastropoda	Neogastropoda	Muricidae	Ceratostoma	foliatum		species		(Gmelin, 1791)
	imerss.org:PMLS:716			Count: few		Andy Lamb								PRESENT				Cadlina luteomarginata complex					iNaturalist:50146								Cadlina luteomarginata							Animalia	Mollusca	Gastropoda	Nudibranchia	Cadlinidae	Cadlina	luteomarginata		species		MacFarland, 1966
	imerss.org:PMLS:717					Andy Lamb		1						PRESENT				Doris montereyensis					iNaturalist:47469								Doris montereyensis							Animalia	Mollusca	Gastropoda	Nudibranchia	Dorididae	Doris	montereyensis		species		J. G. Cooper, 1863
	imerss.org:PMLS:718			Count: few		Andy Lamb								PRESENT				Peltodoris nobilis					iNaturalist:48450								Peltodoris nobilis							Animalia	Mollusca	Gastropoda	Nudibranchia	Discodorididae	Peltodoris	nobilis		species		(MacFarland, 1905)
	imerss.org:PMLS:719					Andy Lamb		1						PRESENT				Diaulula odonoghuei					iNaturalist:508237								Diaulula odonoghuei							Animalia	Mollusca	Gastropoda	Nudibranchia	Discodorididae	Diaulula	odonoghuei		species		(Steinberg, 1963)
	imerss.org:PMLS:720			Count: few		Andy Lamb								PRESENT				Hermissenda crassicornis					iNaturalist:495552								Hermissenda crassicornis							Animalia	Mollusca	Gastropoda	Nudibranchia	Myrrhinidae	Hermissenda	crassicornis		species		(Eschscholtz, 1831)
	imerss.org:PMLS:721			Count: few		Andy Lamb								PRESENT				Chlamys sp.					iNaturalist:84497								Chlamys							Animalia	Mollusca	Bivalvia	Pectinida	Pectinidae	Chlamys			genus
	imerss.org:PMLS:722			Count: some		Andy Lamb								PRESENT				Crassadoma gigantea					iNaturalist:54526								Crassadoma gigantea							Animalia	Mollusca	Bivalvia	Pectinida	Pectinidae	Crassadoma	gigantea		species		(J.E. Gray, 1825)
	imerss.org:PMLS:723			Count: few		Andy Lamb								PRESENT				Pododesmus macrochisma					iNaturalist:68652								Pododesmus macrochisma							Animalia	Mollusca	Bivalvia	Pectinida	Anomiidae	Pododesmus	macrochisma		species		(Deshayes, 1839)
	imerss.org:PMLS:724			Count: few		Andy Lamb								PRESENT				Mytilimeria nuttalli					iNaturalist:873896								Mytilimeria nuttalli							Animalia	Mollusca	Bivalvia		Lyonsiidae	Mytilimeria	nuttalli		species		Conrad, 1837
	imerss.org:PMLS:794					Charlie Gibbs								PRESENT				Cryptochiton stelleri					iNaturalist:49053								Cryptochiton stelleri							Animalia	Mollusca	Polyplacophora	Chitonida	Acanthochitonidae	Cryptochiton	stelleri		species		(Middendorff, 1847)
	imerss.org:PMLS:795					Charlie Gibbs								PRESENT				Diodora aspera					iNaturalist:64148								Diodora aspera							Animalia	Mollusca	Gastropoda	Lepetellida	Fissurellidae	Diodora	aspera		species		(Rathke, 1833)
	imerss.org:PMLS:796					Charlie Gibbs								PRESENT				Calliostoma ligatum					iNaturalist:129920								Calliostoma ligatum							Animalia	Mollusca	Gastropoda	Trochida	Calliostomatidae	Calliostoma	ligatum		species		(Gould, 1849)
	imerss.org:PMLS:797					Charlie Gibbs								PRESENT				Ceratostoma foliatum					iNaturalist:116687								Ceratostoma foliatum							Animalia	Mollusca	Gastropoda	Neogastropoda	Muricidae	Ceratostoma	foliatum		species		(Gmelin, 1791)
	imerss.org:PMLS:798					Charlie Gibbs								PRESENT				Cadlina luteomarginata complex					iNaturalist:50146								Cadlina luteomarginata							Animalia	Mollusca	Gastropoda	Nudibranchia	Cadlinidae	Cadlina	luteomarginata		species		MacFarland, 1966
	imerss.org:PMLS:799					Charlie Gibbs								PRESENT				Peltodoris nobilis					iNaturalist:48450								Peltodoris nobilis							Animalia	Mollusca	Gastropoda	Nudibranchia	Discodorididae	Peltodoris	nobilis		species		(MacFarland, 1905)
	imerss.org:PMLS:800					Charlie Gibbs								PRESENT				Dendronotus rufus					iNaturalist:50393								Dendronotus rufus							Animalia	Mollusca	Gastropoda	Nudibranchia	Dendronotidae	Dendronotus	rufus		species		O'Donoghue, 1921
	imerss.org:PMLS:801					Charlie Gibbs								PRESENT				Mytilus edulis complex					iNaturalist:1108240								Mytilus edulis							Animalia	Mollusca	Bivalvia	Mytilida	Mytilidae	Mytilus	edulis		species
	imerss.org:PMLS:802					Charlie Gibbs								PRESENT				Chlamys sp.					iNaturalist:84497								Chlamys							Animalia	Mollusca	Bivalvia	Pectinida	Pectinidae	Chlamys			genus
	imerss.org:PMLS:803					Charlie Gibbs								PRESENT				Crassadoma gigantea					iNaturalist:54526								Crassadoma gigantea							Animalia	Mollusca	Bivalvia	Pectinida	Pectinidae	Crassadoma	gigantea		species		(J.E. Gray, 1825)
	imerss.org:PMLS:868					Charlie Gibbs								PRESENT				Tonicella lineata					iNaturalist:47425								Tonicella lineata							Animalia	Mollusca	Polyplacophora	Chitonida	Tonicellidae	Tonicella	lineata		species		(Wood, 1815)
	imerss.org:PMLS:869					Charlie Gibbs								PRESENT				Tonicella insignis					iNaturalist:498132								Tonicella insignis							Animalia	Mollusca	Polyplacophora	Chitonida	Tonicellidae	Tonicella	insignis		species		(Reeve, 1847)
	imerss.org:PMLS:870					Charlie Gibbs								PRESENT				Cryptochiton stelleri					iNaturalist:49053								Cryptochiton stelleri							Animalia	Mollusca	Polyplacophora	Chitonida	Acanthochitonidae	Cryptochiton	stelleri		species		(Middendorff, 1847)
	imerss.org:PMLS:871					Charlie Gibbs								PRESENT				Mytilus edulis complex					iNaturalist:1108240								Mytilus edulis							Animalia	Mollusca	Bivalvia	Mytilida	Mytilidae	Mytilus	edulis		species
	imerss.org:PMLS:872					Charlie Gibbs								PRESENT				Chlamys sp.					iNaturalist:84497								Chlamys							Animalia	Mollusca	Bivalvia	Pectinida	Pectinidae	Chlamys			genus
	imerss.org:PMLS:873					Charlie Gibbs								PRESENT				Crassadoma gigantea					iNaturalist:54526								Crassadoma gigantea							Animalia	Mollusca	Bivalvia	Pectinida	Pectinidae	Crassadoma	gigantea		species		(J.E. Gray, 1825)
	imerss.org:PMLS:874					Charlie Gibbs								PRESENT				Tresus capax					iNaturalist:126927								Tresus capax							Animalia	Mollusca	Bivalvia	Venerida	Mactridae	Tresus	capax		species		(Gould, 1850)
	imerss.org:PMLS:875					Charlie Gibbs								PRESENT				Acmaea mitra					iNaturalist:47676								Acmaea mitra							Animalia	Mollusca	Gastropoda		Acmaeidae	Acmaea	mitra		species		Rathke, 1833
	imerss.org:PMLS:876					Charlie Gibbs								PRESENT				Diodora aspera					iNaturalist:64148								Diodora aspera							Animalia	Mollusca	Gastropoda	Lepetellida	Fissurellidae	Diodora	aspera		species		(Rathke, 1833)
	imerss.org:PMLS:877					Charlie Gibbs								PRESENT				Haliotis kamtschatkana					iNaturalist:56654								Haliotis kamtschatkana							Animalia	Mollusca	Gastropoda	Lepetellida	Haliotidae	Haliotis	kamtschatkana		species		Jonas, 1845
	imerss.org:PMLS:878					Charlie Gibbs								PRESENT				Ceratostoma foliatum					iNaturalist:116687								Ceratostoma foliatum							Animalia	Mollusca	Gastropoda	Neogastropoda	Muricidae	Ceratostoma	foliatum		species		(Gmelin, 1791)
	imerss.org:PMLS:879					Charlie Gibbs								PRESENT				Calliostoma ligatum					iNaturalist:129920								Calliostoma ligatum							Animalia	Mollusca	Gastropoda	Trochida	Calliostomatidae	Calliostoma	ligatum		species		(Gould, 1849)
	imerss.org:PMLS:880					Charlie Gibbs								PRESENT				Peltodoris nobilis					iNaturalist:48450								Peltodoris nobilis							Animalia	Mollusca	Gastropoda	Nudibranchia	Discodorididae	Peltodoris	nobilis		species		(MacFarland, 1905)
	imerss.org:PMLS:881					Charlie Gibbs								PRESENT				Doris odhneri					iNaturalist:124210								Doris odhneri							Animalia	Mollusca	Gastropoda	Nudibranchia	Dorididae	Doris	odhneri		species		MacFarland, 1966
	imerss.org:PMLS:882					Charlie Gibbs								PRESENT				Diaulula odonoghuei					iNaturalist:508237								Diaulula odonoghuei							Animalia	Mollusca	Gastropoda	Nudibranchia	Discodorididae	Diaulula	odonoghuei		species		(Steinberg, 1963)
	imerss.org:PMLS:883					Charlie Gibbs								PRESENT				Cadlina luteomarginata complex					iNaturalist:50146								Cadlina luteomarginata							Animalia	Mollusca	Gastropoda	Nudibranchia	Cadlinidae	Cadlina	luteomarginata		species		MacFarland, 1966
	imerss.org:PMLS:884					Charlie Gibbs								PRESENT				Limacia cockerelli					iNaturalist:538830								Limacia cockerelli							Animalia	Mollusca	Gastropoda	Nudibranchia	Polyceridae	Limacia	cockerelli		species		(MacFarland, 1905)
	imerss.org:PMLS:885					Charlie Gibbs								PRESENT				Tochuina gigantea					iNaturalist:873733								Tochuina gigantea							Animalia	Mollusca	Gastropoda	Nudibranchia	Tritoniidae	Tochuina	gigantea		species		(Bergh, 1904)
	imerss.org:PMLS:886					Charlie Gibbs								PRESENT				Hermissenda crassicornis					iNaturalist:495552								Hermissenda crassicornis							Animalia	Mollusca	Gastropoda	Nudibranchia	Myrrhinidae	Hermissenda	crassicornis		species		(Eschscholtz, 1831)
	imerss.org:PMLS:887					Charlie Gibbs								PRESENT				Enteroctopus dofleini					iNaturalist:48863								Enteroctopus dofleini							Animalia	Mollusca	Cephalopoda	Octopoda	Enteroctopodidae	Enteroctopus	dofleini		species		(Wülker, 1910)
	imerss.org:PMLS:937					Charlie Gibbs								PRESENT				Tonicella lineata					iNaturalist:47425								Tonicella lineata							Animalia	Mollusca	Polyplacophora	Chitonida	Tonicellidae	Tonicella	lineata		species		(Wood, 1815)
	imerss.org:PMLS:938					Charlie Gibbs								PRESENT				Tonicella insignis					iNaturalist:498132								Tonicella insignis							Animalia	Mollusca	Polyplacophora	Chitonida	Tonicellidae	Tonicella	insignis		species		(Reeve, 1847)
	imerss.org:PMLS:939					Charlie Gibbs								PRESENT				Mopalia sp.					iNaturalist:47630								Mopalia							Animalia	Mollusca	Polyplacophora	Chitonida	Mopaliidae	Mopalia			genus
	imerss.org:PMLS:940					Charlie Gibbs								PRESENT				Cryptochiton stelleri					iNaturalist:49053								Cryptochiton stelleri							Animalia	Mollusca	Polyplacophora	Chitonida	Acanthochitonidae	Cryptochiton	stelleri		species		(Middendorff, 1847)
	imerss.org:PMLS:941					Charlie Gibbs								PRESENT				Chlamys sp.					iNaturalist:84497								Chlamys							Animalia	Mollusca	Bivalvia	Pectinida	Pectinidae	Chlamys			genus
	imerss.org:PMLS:942					Charlie Gibbs								PRESENT				Crassadoma gigantea					iNaturalist:54526								Crassadoma gigantea							Animalia	Mollusca	Bivalvia	Pectinida	Pectinidae	Crassadoma	gigantea		species		(J.E. Gray, 1825)
	imerss.org:PMLS:943					Charlie Gibbs								PRESENT				Tresus capax					iNaturalist:126927								Tresus capax							Animalia	Mollusca	Bivalvia	Venerida	Mactridae	Tresus	capax		species		(Gould, 1850)
	imerss.org:PMLS:944					Charlie Gibbs								PRESENT				Ceratostoma foliatum					iNaturalist:116687								Ceratostoma foliatum							Animalia	Mollusca	Gastropoda	Neogastropoda	Muricidae	Ceratostoma	foliatum		species		(Gmelin, 1791)
	imerss.org:PMLS:945					Charlie Gibbs								PRESENT				Gastropteron pacificum					iNaturalist:49839								Gastropteron pacificum							Animalia	Mollusca	Gastropoda	Cephalaspidea	Gastropteridae	Gastropteron	pacificum		species		Bergh, 1894
	imerss.org:PMLS:946					Charlie Gibbs								PRESENT				Peltodoris nobilis					iNaturalist:48450								Peltodoris nobilis							Animalia	Mollusca	Gastropoda	Nudibranchia	Discodorididae	Peltodoris	nobilis		species		(MacFarland, 1905)
	imerss.org:PMLS:947					Charlie Gibbs								PRESENT				Cadlina luteomarginata complex					iNaturalist:50146								Cadlina luteomarginata							Animalia	Mollusca	Gastropoda	Nudibranchia	Cadlinidae	Cadlina	luteomarginata		species		MacFarland, 1966
	imerss.org:PMLS:948					Charlie Gibbs								PRESENT				Dendronotus iris					iNaturalist:47706								Dendronotus iris							Animalia	Mollusca	Gastropoda	Nudibranchia	Dendronotidae	Dendronotus	iris		species		J. G. Cooper, 1863
	imerss.org:PMLS:949					Charlie Gibbs								PRESENT				Dendronotus rufus					iNaturalist:50393								Dendronotus rufus							Animalia	Mollusca	Gastropoda	Nudibranchia	Dendronotidae	Dendronotus	rufus		species		O'Donoghue, 1921
	imerss.org:PMLS:950					Charlie Gibbs								PRESENT				Rossia pacifica					iNaturalist:151358								Rossia pacifica							Animalia	Mollusca	Cephalopoda	Sepiida	Sepiolidae	Rossia	pacifica		species		Berry, 1911
	imerss.org:PMLS:1030					Andy Lamb								PRESENT				Tonicella lineata					iNaturalist:47425								Tonicella lineata							Animalia	Mollusca	Polyplacophora	Chitonida	Tonicellidae	Tonicella	lineata		species		(Wood, 1815)
	imerss.org:PMLS:1031			Count: few		Andy Lamb								PRESENT				Lepidozona mertensii					iNaturalist:117621								Lepidozona mertensii							Animalia	Mollusca	Polyplacophora	Chitonida	Ischnochitonidae	Lepidozona	mertensii		species		(Middendorff, 1847)
	imerss.org:PMLS:1032			Count: few		Andy Lamb								PRESENT				Katharina tunicata					iNaturalist:47632								Katharina tunicata							Animalia	Mollusca	Polyplacophora	Chitonida	Mopaliidae	Katharina	tunicata		species		(Wood, 1815)
	imerss.org:PMLS:1033					Andy Lamb								PRESENT				Cryptochiton stelleri					iNaturalist:49053								Cryptochiton stelleri							Animalia	Mollusca	Polyplacophora	Chitonida	Acanthochitonidae	Cryptochiton	stelleri		species		(Middendorff, 1847)
	imerss.org:PMLS:1034					Andy Lamb								PRESENT				Mytilus edulis complex					iNaturalist:1108240								Mytilus edulis							Animalia	Mollusca	Bivalvia	Mytilida	Mytilidae	Mytilus	edulis		species
	imerss.org:PMLS:1035			Count: few		Andy Lamb								PRESENT				Chlamys sp.					iNaturalist:84497								Chlamys							Animalia	Mollusca	Bivalvia	Pectinida	Pectinidae	Chlamys			genus
	imerss.org:PMLS:1036					Andy Lamb								PRESENT				Crassadoma gigantea					iNaturalist:54526								Crassadoma gigantea							Animalia	Mollusca	Bivalvia	Pectinida	Pectinidae	Crassadoma	gigantea		species		(J.E. Gray, 1825)
	imerss.org:PMLS:1037			Count: few		Andy Lamb								PRESENT				Mytilimeria nuttalli					iNaturalist:873896								Mytilimeria nuttalli							Animalia	Mollusca	Bivalvia		Lyonsiidae	Mytilimeria	nuttalli		species		Conrad, 1837
	imerss.org:PMLS:1038					Andy Lamb		2						PRESENT				Entodesma navicula					iNaturalist:339164								Entodesma navicula							Animalia	Mollusca	Bivalvia		Lyonsiidae	Entodesma	navicula		species		(Adams & Reeve, 1850)
	imerss.org:PMLS:1039			Count: some		Andy Lamb								PRESENT				Lottia sp.					iNaturalist:48752								Lottia							Animalia	Mollusca	Gastropoda		Lottiidae	Lottia			genus
	imerss.org:PMLS:1040					Andy Lamb								PRESENT				Acmaea mitra					iNaturalist:47676								Acmaea mitra							Animalia	Mollusca	Gastropoda		Acmaeidae	Acmaea	mitra		species		Rathke, 1833
	imerss.org:PMLS:1041			Count: few		Andy Lamb								PRESENT				Crepidula cf nummaria					iNaturalist:117325								Crepidula nummaria							Animalia	Mollusca	Gastropoda	Littorinimorpha	Calyptraeidae	Crepidula	nummaria		species
	imerss.org:PMLS:1042			Count: few		Andy Lamb								PRESENT				Paciocinebrina lurida					iNaturalist:910800								Paciocinebrina lurida							Animalia	Mollusca	Gastropoda	Neogastropoda	Muricidae	Paciocinebrina	lurida		species		(Middendorff, 1848)
	imerss.org:PMLS:1043			Count: very many		Andy Lamb								PRESENT				Calliostoma ligatum					iNaturalist:129920								Calliostoma ligatum							Animalia	Mollusca	Gastropoda	Trochida	Calliostomatidae	Calliostoma	ligatum		species		(Gould, 1849)
	imerss.org:PMLS:1044			Count: few		Andy Lamb								PRESENT				Doris odhneri					iNaturalist:124210								Doris odhneri							Animalia	Mollusca	Gastropoda	Nudibranchia	Dorididae	Doris	odhneri		species		MacFarland, 1966
	imerss.org:PMLS:1045					Andy Lamb								PRESENT				Cadlina luteomarginata complex					iNaturalist:50146								Cadlina luteomarginata							Animalia	Mollusca	Gastropoda	Nudibranchia	Cadlinidae	Cadlina	luteomarginata		species		MacFarland, 1966
	imerss.org:PMLS:1046					Andy Lamb		1						PRESENT				Antiopella fusca					iNaturalist:886884								Antiopella fusca							Animalia	Mollusca	Gastropoda	Nudibranchia	Janolidae	Antiopella	fusca		species		(O'Donoghue, 1924)
	imerss.org:PMLS:1047			Count: few		Andy Lamb								PRESENT				Hermissenda crassicornis					iNaturalist:495552								Hermissenda crassicornis							Animalia	Mollusca	Gastropoda	Nudibranchia	Myrrhinidae	Hermissenda	crassicornis		species		(Eschscholtz, 1831)
	imerss.org:PMLS:1048			Count: very many		Andy Lamb								PRESENT				Coryphella verrucosa					iNaturalist:633193								Coryphella verrucosa							Animalia	Mollusca	Gastropoda	Nudibranchia	Coryphellidae	Coryphella	verrucosa		species		(M. Sars, 1829)
	imerss.org:PMLS:1049			Count: very many		Andy Lamb								PRESENT				Orienthella trilineata					iNaturalist:764704								Orienthella trilineata							Animalia	Mollusca	Gastropoda	Nudibranchia	Coryphellidae	Orienthella	trilineata		species		(O'Donoghue, 1921)
	imerss.org:PMLS:1119			Count: few		Andy Lamb								PRESENT				Tonicella lineata					iNaturalist:47425								Tonicella lineata							Animalia	Mollusca	Polyplacophora	Chitonida	Tonicellidae	Tonicella	lineata		species		(Wood, 1815)
	imerss.org:PMLS:1120					Andy Lamb		1						PRESENT				Cryptochiton stelleri					iNaturalist:49053								Cryptochiton stelleri							Animalia	Mollusca	Polyplacophora	Chitonida	Acanthochitonidae	Cryptochiton	stelleri		species		(Middendorff, 1847)
	imerss.org:PMLS:1121			Count: few		Andy Lamb								PRESENT				Chlamys sp.					iNaturalist:84497								Chlamys							Animalia	Mollusca	Bivalvia	Pectinida	Pectinidae	Chlamys			genus
	imerss.org:PMLS:1122			Count: many		Andy Lamb								PRESENT				Crassadoma gigantea					iNaturalist:54526								Crassadoma gigantea							Animalia	Mollusca	Bivalvia	Pectinida	Pectinidae	Crassadoma	gigantea		species		(J.E. Gray, 1825)
	imerss.org:PMLS:1123			Count: few		Andy Lamb								PRESENT				Acmaea mitra					iNaturalist:47676								Acmaea mitra							Animalia	Mollusca	Gastropoda		Acmaeidae	Acmaea	mitra		species		Rathke, 1833
	imerss.org:PMLS:1124					Andy Lamb		2						PRESENT				Haliotis kamtschatkana					iNaturalist:56654								Haliotis kamtschatkana							Animalia	Mollusca	Gastropoda	Lepetellida	Haliotidae	Haliotis	kamtschatkana		species		Jonas, 1845
	imerss.org:PMLS:1125					Andy Lamb								PRESENT				Ceratostoma foliatum					iNaturalist:116687								Ceratostoma foliatum							Animalia	Mollusca	Gastropoda	Neogastropoda	Muricidae	Ceratostoma	foliatum		species		(Gmelin, 1791)
	imerss.org:PMLS:1126					Andy Lamb								PRESENT				Calliostoma ligatum					iNaturalist:129920								Calliostoma ligatum							Animalia	Mollusca	Gastropoda	Trochida	Calliostomatidae	Calliostoma	ligatum		species		(Gould, 1849)
	imerss.org:PMLS:1127			Count: very many		Andy Lamb								PRESENT				Cadlina luteomarginata complex					iNaturalist:50146								Cadlina luteomarginata							Animalia	Mollusca	Gastropoda	Nudibranchia	Cadlinidae	Cadlina	luteomarginata		species		MacFarland, 1966
	imerss.org:PMLS:1128			Count: few		Andy Lamb								PRESENT				Acanthodoris nanaimoensis					iNaturalist:47476								Acanthodoris nanaimoensis							Animalia	Mollusca	Gastropoda	Nudibranchia	Onchidorididae	Acanthodoris	nanaimoensis		species		O'Donoghue, 1921
	imerss.org:PMLS:1129					Andy Lamb		1						PRESENT				Dendronotus iris					iNaturalist:47706								Dendronotus iris							Animalia	Mollusca	Gastropoda	Nudibranchia	Dendronotidae	Dendronotus	iris		species		J. G. Cooper, 1863
	imerss.org:PMLS:1130					Andy Lamb		1						PRESENT				Melibe leonina					iNaturalist:48455								Melibe leonina							Animalia	Mollusca	Gastropoda	Nudibranchia	Tethydidae	Melibe	leonina		species		(Gould, 1852)
	imerss.org:PMLS:1131					Andy Lamb		1						PRESENT				Dirona albolineata					iNaturalist:47477								Dirona albolineata							Animalia	Mollusca	Gastropoda	Nudibranchia	Dironidae	Dirona	albolineata		species		MacFarland, 1905
	imerss.org:PMLS:1238					Andy Lamb								PRESENT				Tonicella insignis					iNaturalist:498132								Tonicella insignis							Animalia	Mollusca	Polyplacophora	Chitonida	Tonicellidae	Tonicella	insignis		species		(Reeve, 1847)
	imerss.org:PMLS:1239					Andy Lamb								PRESENT				Tonicella lineata					iNaturalist:47425								Tonicella lineata							Animalia	Mollusca	Polyplacophora	Chitonida	Tonicellidae	Tonicella	lineata		species		(Wood, 1815)
	imerss.org:PMLS:1240			Count: many		Andy Lamb								PRESENT				Mopalia sp.					iNaturalist:47630								Mopalia							Animalia	Mollusca	Polyplacophora	Chitonida	Mopaliidae	Mopalia			genus
	imerss.org:PMLS:1241			Count: few		Andy Lamb								PRESENT				Cryptochiton stelleri					iNaturalist:49053								Cryptochiton stelleri							Animalia	Mollusca	Polyplacophora	Chitonida	Acanthochitonidae	Cryptochiton	stelleri		species		(Middendorff, 1847)
	imerss.org:PMLS:1242					Andy Lamb								PRESENT				Diodora aspera					iNaturalist:64148								Diodora aspera							Animalia	Mollusca	Gastropoda	Lepetellida	Fissurellidae	Diodora	aspera		species		(Rathke, 1833)
	imerss.org:PMLS:1243			Count: very many		Andy Lamb								PRESENT				Calliostoma ligatum					iNaturalist:129920								Calliostoma ligatum							Animalia	Mollusca	Gastropoda	Trochida	Calliostomatidae	Calliostoma	ligatum		species		(Gould, 1849)
	imerss.org:PMLS:1244			Count: few		Andy Lamb								PRESENT				Acmaea mitra					iNaturalist:47676								Acmaea mitra							Animalia	Mollusca	Gastropoda		Acmaeidae	Acmaea	mitra		species		Rathke, 1833
	imerss.org:PMLS:1245			Count: few		Andy Lamb								PRESENT				Vermetus compactus					iNaturalist:883089								Petaloconchus compactus							Animalia	Mollusca	Gastropoda	Littorinimorpha	Vermetidae	Petaloconchus	compactus		species
	imerss.org:PMLS:1246			Count: abundant		Andy Lamb								PRESENT				Ceratostoma foliatum					iNaturalist:116687								Ceratostoma foliatum							Animalia	Mollusca	Gastropoda	Neogastropoda	Muricidae	Ceratostoma	foliatum		species		(Gmelin, 1791)
	imerss.org:PMLS:1247			Count: few		Andy Lamb								PRESENT				Paciocinebrina lurida					iNaturalist:910800								Paciocinebrina lurida							Animalia	Mollusca	Gastropoda	Neogastropoda	Muricidae	Paciocinebrina	lurida		species		(Middendorff, 1848)
	imerss.org:PMLS:1248					Andy Lamb		1						PRESENT				Scabrotrophon maltzani					iNaturalist:500269								Scabrotrophon maltzani							Animalia	Mollusca	Gastropoda	Neogastropoda	Muricidae	Scabrotrophon	maltzani		species		(Kobelt, 1878)
	imerss.org:PMLS:1249			Count: few		Andy Lamb								PRESENT				Nucella lamellosa					iNaturalist:117641								Nucella lamellosa							Animalia	Mollusca	Gastropoda	Neogastropoda	Muricidae	Nucella	lamellosa		species		(Gmelin, 1791)
	imerss.org:PMLS:1250					Andy Lamb		1						PRESENT				Nucella canaliculata					iNaturalist:69998								Nucella canaliculata							Animalia	Mollusca	Gastropoda	Neogastropoda	Muricidae	Nucella	canaliculata		species		(Duclos, 1832)
	imerss.org:PMLS:1251			Count: few		Andy Lamb								PRESENT				Amphissa columbiana					iNaturalist:117643								Amphissa columbiana							Animalia	Mollusca	Gastropoda	Neogastropoda	Columbellidae	Amphissa	columbiana		species		Dall, 1916
	imerss.org:PMLS:1252			Count: few		Andy Lamb								PRESENT				Aglaja diomedea					iNaturalist:345334								Melanochlamys diomedea							Animalia	Mollusca	Gastropoda	Cephalaspidea	Aglajidae	Melanochlamys	diomedea		species		(Bergh, 1894)
	imerss.org:PMLS:1253			Count: few		Andy Lamb								PRESENT				Acanthodoris hudsoni					iNaturalist:48447								Acanthodoris hudsoni							Animalia	Mollusca	Gastropoda	Nudibranchia	Onchidorididae	Acanthodoris	hudsoni		species		MacFarland, 1905
	imerss.org:PMLS:1254			Count: few		Andy Lamb								PRESENT				Acanthodoris nanaimoensis					iNaturalist:47476								Acanthodoris nanaimoensis							Animalia	Mollusca	Gastropoda	Nudibranchia	Onchidorididae	Acanthodoris	nanaimoensis		species		O'Donoghue, 1921
	imerss.org:PMLS:1255			Count: very many		Andy Lamb								PRESENT				Limacia cockerelli					iNaturalist:538830								Limacia cockerelli							Animalia	Mollusca	Gastropoda	Nudibranchia	Polyceridae	Limacia	cockerelli		species		(MacFarland, 1905)
	imerss.org:PMLS:1256			Count: many		Andy Lamb								PRESENT				Cadlina luteomarginata complex					iNaturalist:50146								Cadlina luteomarginata							Animalia	Mollusca	Gastropoda	Nudibranchia	Cadlinidae	Cadlina	luteomarginata		species		MacFarland, 1966
	imerss.org:PMLS:1257					Andy Lamb		1						PRESENT				Aldisa cooperi					iNaturalist:50097								Aldisa cooperi							Animalia	Mollusca	Gastropoda	Nudibranchia	Cadlinidae	Aldisa	cooperi		species		Robilliard & Baba, 1972
	imerss.org:PMLS:1258			Count: few		Andy Lamb								PRESENT				Peltodoris nobilis					iNaturalist:48450								Peltodoris nobilis							Animalia	Mollusca	Gastropoda	Nudibranchia	Discodorididae	Peltodoris	nobilis		species		(MacFarland, 1905)
	imerss.org:PMLS:1259					Andy Lamb		1						PRESENT				Tochuina gigantea					iNaturalist:873733								Tochuina gigantea							Animalia	Mollusca	Gastropoda	Nudibranchia	Tritoniidae	Tochuina	gigantea		species		(Bergh, 1904)
	imerss.org:PMLS:1260			Count: few		Andy Lamb								PRESENT				Dirona albolineata					iNaturalist:47477								Dirona albolineata							Animalia	Mollusca	Gastropoda	Nudibranchia	Dironidae	Dirona	albolineata		species		MacFarland, 1905
	imerss.org:PMLS:1261			Count: very many		Andy Lamb								PRESENT				Antiopella fusca					iNaturalist:886884								Antiopella fusca							Animalia	Mollusca	Gastropoda	Nudibranchia	Janolidae	Antiopella	fusca		species		(O'Donoghue, 1924)
	imerss.org:PMLS:1262			Count: very many		Andy Lamb								PRESENT				Hermissenda crassicornis					iNaturalist:495552								Hermissenda crassicornis							Animalia	Mollusca	Gastropoda	Nudibranchia	Myrrhinidae	Hermissenda	crassicornis		species		(Eschscholtz, 1831)
	imerss.org:PMLS:1263			Count: few		Andy Lamb								PRESENT				Mytilus edulis complex					iNaturalist:1108240								Mytilus edulis							Animalia	Mollusca	Bivalvia	Mytilida	Mytilidae	Mytilus	edulis		species
	imerss.org:PMLS:1264			Count: very many		Andy Lamb								PRESENT				Crassadoma gigantea					iNaturalist:54526								Crassadoma gigantea							Animalia	Mollusca	Bivalvia	Pectinida	Pectinidae	Crassadoma	gigantea		species		(J.E. Gray, 1825)
	imerss.org:PMLS:1265					Andy Lamb		1						PRESENT				Panopea generosa					iNaturalist:117618								Panopea generosa							Animalia	Mollusca	Bivalvia	Adapedonta	Hiatellidae	Panopea	generosa		species		Gould, 1850
	imerss.org:PMLS:1266					Andy Lamb								PRESENT				Entodesma navicula					iNaturalist:339164								Entodesma navicula							Animalia	Mollusca	Bivalvia		Lyonsiidae	Entodesma	navicula		species		(Adams & Reeve, 1850)
	imerss.org:PMLS:1267					Andy Lamb		2						PRESENT				Enteroctopus dofleini					iNaturalist:48863								Enteroctopus dofleini							Animalia	Mollusca	Cephalopoda	Octopoda	Enteroctopodidae	Enteroctopus	dofleini		species		(Wülker, 1910)
	imerss.org:PMLS:1331					Charlie Gibbs								PRESENT				Clinocardium nuttallii					iNaturalist:69925								Clinocardium nuttallii							Animalia	Mollusca	Bivalvia	Cardiida	Cardiidae	Clinocardium	nuttallii		species		(Conrad, 1837)
	imerss.org:PMLS:1332					Charlie Gibbs								PRESENT				Tresus capax					iNaturalist:126927								Tresus capax							Animalia	Mollusca	Bivalvia	Venerida	Mactridae	Tresus	capax		species		(Gould, 1850)
	imerss.org:PMLS:1333					Charlie Gibbs								PRESENT				Phyllaplysia taylori					iNaturalist:49864								Phyllaplysia taylori							Animalia	Mollusca	Gastropoda	Aplysiida	Aplysiidae	Phyllaplysia	taylori		species		Dall, 1900
	imerss.org:PMLS:1334					Charlie Gibbs								PRESENT				Dendronotus iris					iNaturalist:47706								Dendronotus iris							Animalia	Mollusca	Gastropoda	Nudibranchia	Dendronotidae	Dendronotus	iris		species		J. G. Cooper, 1863
	imerss.org:PMLS:1335					Charlie Gibbs								PRESENT				Dirona albolineata					iNaturalist:47477								Dirona albolineata							Animalia	Mollusca	Gastropoda	Nudibranchia	Dironidae	Dirona	albolineata		species		MacFarland, 1905
	imerss.org:PMLS:1336					Charlie Gibbs								PRESENT				Antiopella fusca					iNaturalist:886884								Antiopella fusca							Animalia	Mollusca	Gastropoda	Nudibranchia	Janolidae	Antiopella	fusca		species		(O'Donoghue, 1924)
	imerss.org:PMLS:1337			Count: many		Charlie Gibbs								PRESENT				Rossia pacifica					iNaturalist:151358								Rossia pacifica							Animalia	Mollusca	Cephalopoda	Sepiida	Sepiolidae	Rossia	pacifica		species		Berry, 1911
	imerss.org:PMLS:1395					Charlie Gibbs								PRESENT				Tonicella lineata					iNaturalist:47425								Tonicella lineata							Animalia	Mollusca	Polyplacophora	Chitonida	Tonicellidae	Tonicella	lineata		species		(Wood, 1815)
	imerss.org:PMLS:1396					Charlie Gibbs								PRESENT				Tonicella insignis					iNaturalist:498132								Tonicella insignis							Animalia	Mollusca	Polyplacophora	Chitonida	Tonicellidae	Tonicella	insignis		species		(Reeve, 1847)
	imerss.org:PMLS:1397					Charlie Gibbs								PRESENT				Mopalia sp.					iNaturalist:47630								Mopalia							Animalia	Mollusca	Polyplacophora	Chitonida	Mopaliidae	Mopalia			genus
	imerss.org:PMLS:1398					Charlie Gibbs								PRESENT				Cryptochiton stelleri					iNaturalist:49053								Cryptochiton stelleri							Animalia	Mollusca	Polyplacophora	Chitonida	Acanthochitonidae	Cryptochiton	stelleri		species		(Middendorff, 1847)
	imerss.org:PMLS:1399					Charlie Gibbs								PRESENT				Chlamys sp.					iNaturalist:84497								Chlamys							Animalia	Mollusca	Bivalvia	Pectinida	Pectinidae	Chlamys			genus
	imerss.org:PMLS:1400					Charlie Gibbs								PRESENT				Crassadoma gigantea					iNaturalist:54526								Crassadoma gigantea							Animalia	Mollusca	Bivalvia	Pectinida	Pectinidae	Crassadoma	gigantea		species		(J.E. Gray, 1825)
	imerss.org:PMLS:1401					Charlie Gibbs								PRESENT				Entodesma navicula					iNaturalist:339164								Entodesma navicula							Animalia	Mollusca	Bivalvia		Lyonsiidae	Entodesma	navicula		species		(Adams & Reeve, 1850)
	imerss.org:PMLS:1402					Charlie Gibbs								PRESENT				Acmaea mitra					iNaturalist:47676								Acmaea mitra							Animalia	Mollusca	Gastropoda		Acmaeidae	Acmaea	mitra		species		Rathke, 1833
	imerss.org:PMLS:1403					Charlie Gibbs								PRESENT				Puncturella cucullata					iNaturalist:904312								Puncturella cucullata							Animalia	Mollusca	Gastropoda	Lepetellida	Fissurellidae	Puncturella	cucullata		species		(Gould, 1846)
	imerss.org:PMLS:1404					Charlie Gibbs								PRESENT				Ceratostoma foliatum					iNaturalist:116687								Ceratostoma foliatum							Animalia	Mollusca	Gastropoda	Neogastropoda	Muricidae	Ceratostoma	foliatum		species		(Gmelin, 1791)
	imerss.org:PMLS:1405					Charlie Gibbs								PRESENT				Calliostoma ligatum					iNaturalist:129920								Calliostoma ligatum							Animalia	Mollusca	Gastropoda	Trochida	Calliostomatidae	Calliostoma	ligatum		species		(Gould, 1849)
	imerss.org:PMLS:1406					Charlie Gibbs								PRESENT				Doris montereyensis					iNaturalist:47469								Doris montereyensis							Animalia	Mollusca	Gastropoda	Nudibranchia	Dorididae	Doris	montereyensis		species		J. G. Cooper, 1863
	imerss.org:PMLS:1407					Charlie Gibbs								PRESENT				Doris odhneri					iNaturalist:124210								Doris odhneri							Animalia	Mollusca	Gastropoda	Nudibranchia	Dorididae	Doris	odhneri		species		MacFarland, 1966
	imerss.org:PMLS:1408					Charlie Gibbs								PRESENT				Diaulula odonoghuei					iNaturalist:508237								Diaulula odonoghuei							Animalia	Mollusca	Gastropoda	Nudibranchia	Discodorididae	Diaulula	odonoghuei		species		(Steinberg, 1963)
	imerss.org:PMLS:1409					Charlie Gibbs								PRESENT				Cadlina luteomarginata complex					iNaturalist:50146								Cadlina luteomarginata							Animalia	Mollusca	Gastropoda	Nudibranchia	Cadlinidae	Cadlina	luteomarginata		species		MacFarland, 1966
	imerss.org:PMLS:1410					Charlie Gibbs								PRESENT				Limacia cockerelli					iNaturalist:538830								Limacia cockerelli							Animalia	Mollusca	Gastropoda	Nudibranchia	Polyceridae	Limacia	cockerelli		species		(MacFarland, 1905)
	imerss.org:PMLS:1411					Charlie Gibbs								PRESENT				Dirona albolineata					iNaturalist:47477								Dirona albolineata							Animalia	Mollusca	Gastropoda	Nudibranchia	Dironidae	Dirona	albolineata		species		MacFarland, 1905
	imerss.org:PMLS:1412					Charlie Gibbs								PRESENT				Hermissenda crassicornis					iNaturalist:495552								Hermissenda crassicornis							Animalia	Mollusca	Gastropoda	Nudibranchia	Myrrhinidae	Hermissenda	crassicornis		species		(Eschscholtz, 1831)
	imerss.org:PMLS:1413					Charlie Gibbs								PRESENT				Orienthella trilineata					iNaturalist:764704								Orienthella trilineata							Animalia	Mollusca	Gastropoda	Nudibranchia	Coryphellidae	Orienthella	trilineata		species		(O'Donoghue, 1921)
	imerss.org:PMLS:1486					Charlie Gibbs								PRESENT				Tonicella lineata					iNaturalist:47425								Tonicella lineata							Animalia	Mollusca	Polyplacophora	Chitonida	Tonicellidae	Tonicella	lineata		species		(Wood, 1815)
	imerss.org:PMLS:1487					Charlie Gibbs								PRESENT				Tonicella insignis					iNaturalist:498132								Tonicella insignis							Animalia	Mollusca	Polyplacophora	Chitonida	Tonicellidae	Tonicella	insignis		species		(Reeve, 1847)
	imerss.org:PMLS:1488					Charlie Gibbs								PRESENT				Mopalia sp.					iNaturalist:47630								Mopalia							Animalia	Mollusca	Polyplacophora	Chitonida	Mopaliidae	Mopalia			genus
	imerss.org:PMLS:1489					Charlie Gibbs								PRESENT				Cryptochiton stelleri					iNaturalist:49053								Cryptochiton stelleri							Animalia	Mollusca	Polyplacophora	Chitonida	Acanthochitonidae	Cryptochiton	stelleri		species		(Middendorff, 1847)
	imerss.org:PMLS:1490					Charlie Gibbs								PRESENT				Chlamys sp.					iNaturalist:84497								Chlamys							Animalia	Mollusca	Bivalvia	Pectinida	Pectinidae	Chlamys			genus
	imerss.org:PMLS:1491					Charlie Gibbs								PRESENT				Crassadoma gigantea					iNaturalist:54526								Crassadoma gigantea							Animalia	Mollusca	Bivalvia	Pectinida	Pectinidae	Crassadoma	gigantea		species		(J.E. Gray, 1825)
	imerss.org:PMLS:1492					Charlie Gibbs								PRESENT				Pododesmus macrochisma					iNaturalist:68652								Pododesmus macrochisma							Animalia	Mollusca	Bivalvia	Pectinida	Anomiidae	Pododesmus	macrochisma		species		(Deshayes, 1839)
	imerss.org:PMLS:1493					Charlie Gibbs								PRESENT				Diodora aspera					iNaturalist:64148								Diodora aspera							Animalia	Mollusca	Gastropoda	Lepetellida	Fissurellidae	Diodora	aspera		species		(Rathke, 1833)
	imerss.org:PMLS:1494					Charlie Gibbs								PRESENT				Nucella lamellosa					iNaturalist:117641								Nucella lamellosa							Animalia	Mollusca	Gastropoda	Neogastropoda	Muricidae	Nucella	lamellosa		species		(Gmelin, 1791)
	imerss.org:PMLS:1495					Charlie Gibbs								PRESENT				Ceratostoma foliatum					iNaturalist:116687								Ceratostoma foliatum							Animalia	Mollusca	Gastropoda	Neogastropoda	Muricidae	Ceratostoma	foliatum		species		(Gmelin, 1791)
	imerss.org:PMLS:1496					Charlie Gibbs								PRESENT				Doris montereyensis					iNaturalist:47469								Doris montereyensis							Animalia	Mollusca	Gastropoda	Nudibranchia	Dorididae	Doris	montereyensis		species		J. G. Cooper, 1863
	imerss.org:PMLS:1497					Charlie Gibbs								PRESENT				Doris odhneri					iNaturalist:124210								Doris odhneri							Animalia	Mollusca	Gastropoda	Nudibranchia	Dorididae	Doris	odhneri		species		MacFarland, 1966
	imerss.org:PMLS:1498					Charlie Gibbs								PRESENT				Diaulula odonoghuei					iNaturalist:508237								Diaulula odonoghuei							Animalia	Mollusca	Gastropoda	Nudibranchia	Discodorididae	Diaulula	odonoghuei		species		(Steinberg, 1963)
	imerss.org:PMLS:1499					Charlie Gibbs								PRESENT				Cadlina luteomarginata complex					iNaturalist:50146								Cadlina luteomarginata							Animalia	Mollusca	Gastropoda	Nudibranchia	Cadlinidae	Cadlina	luteomarginata		species		MacFarland, 1966
	imerss.org:PMLS:1500					Charlie Gibbs								PRESENT				Triopha modesta					iNaturalist:1133369								Triopha modesta							Animalia	Mollusca	Gastropoda	Nudibranchia	Polyceridae	Triopha	modesta		species		Bergh, 1880
	imerss.org:PMLS:1501					Charlie Gibbs								PRESENT				Limacia cockerelli					iNaturalist:538830								Limacia cockerelli							Animalia	Mollusca	Gastropoda	Nudibranchia	Polyceridae	Limacia	cockerelli		species		(MacFarland, 1905)
	imerss.org:PMLS:1502					Charlie Gibbs								PRESENT				Dirona albolineata					iNaturalist:47477								Dirona albolineata							Animalia	Mollusca	Gastropoda	Nudibranchia	Dironidae	Dirona	albolineata		species		MacFarland, 1905
	imerss.org:PMLS:1587					Charlie Gibbs								PRESENT				Tonicella lineata					iNaturalist:47425								Tonicella lineata							Animalia	Mollusca	Polyplacophora	Chitonida	Tonicellidae	Tonicella	lineata		species		(Wood, 1815)
	imerss.org:PMLS:1588					Charlie Gibbs								PRESENT				Tonicella insignis					iNaturalist:498132								Tonicella insignis							Animalia	Mollusca	Polyplacophora	Chitonida	Tonicellidae	Tonicella	insignis		species		(Reeve, 1847)
	imerss.org:PMLS:1589					Charlie Gibbs								PRESENT				Mopalia sp.					iNaturalist:47630								Mopalia							Animalia	Mollusca	Polyplacophora	Chitonida	Mopaliidae	Mopalia			genus
	imerss.org:PMLS:1590					Charlie Gibbs								PRESENT				Mytilus edulis complex					iNaturalist:1108240								Mytilus edulis							Animalia	Mollusca	Bivalvia	Mytilida	Mytilidae	Mytilus	edulis		species
	imerss.org:PMLS:1591					Charlie Gibbs								PRESENT				Chlamys sp.					iNaturalist:84497								Chlamys							Animalia	Mollusca	Bivalvia	Pectinida	Pectinidae	Chlamys			genus
	imerss.org:PMLS:1592					Charlie Gibbs								PRESENT				Crassadoma gigantea					iNaturalist:54526								Crassadoma gigantea							Animalia	Mollusca	Bivalvia	Pectinida	Pectinidae	Crassadoma	gigantea		species		(J.E. Gray, 1825)
	imerss.org:PMLS:1593					Charlie Gibbs								PRESENT				Tresus capax					iNaturalist:126927								Tresus capax							Animalia	Mollusca	Bivalvia	Venerida	Mactridae	Tresus	capax		species		(Gould, 1850)
	imerss.org:PMLS:1594					Charlie Gibbs								PRESENT				Nucella lamellosa					iNaturalist:117641								Nucella lamellosa							Animalia	Mollusca	Gastropoda	Neogastropoda	Muricidae	Nucella	lamellosa		species		(Gmelin, 1791)
	imerss.org:PMLS:1595					Charlie Gibbs								PRESENT				Ceratostoma foliatum					iNaturalist:116687								Ceratostoma foliatum							Animalia	Mollusca	Gastropoda	Neogastropoda	Muricidae	Ceratostoma	foliatum		species		(Gmelin, 1791)
	imerss.org:PMLS:1596					Charlie Gibbs								PRESENT				Neverita lewisii					iNaturalist:447427								Neverita lewisii							Animalia	Mollusca	Gastropoda	Littorinimorpha	Naticidae	Neverita	lewisii		species		(Gould, 1847)
	imerss.org:PMLS:1597					Charlie Gibbs								PRESENT				Phyllaplysia taylori					iNaturalist:49864								Phyllaplysia taylori							Animalia	Mollusca	Gastropoda	Aplysiida	Aplysiidae	Phyllaplysia	taylori		species		Dall, 1900
	imerss.org:PMLS:1598					Charlie Gibbs								PRESENT				Doris montereyensis					iNaturalist:47469								Doris montereyensis							Animalia	Mollusca	Gastropoda	Nudibranchia	Dorididae	Doris	montereyensis		species		J. G. Cooper, 1863
	imerss.org:PMLS:1599					Charlie Gibbs								PRESENT				Diaulula odonoghuei					iNaturalist:508237								Diaulula odonoghuei							Animalia	Mollusca	Gastropoda	Nudibranchia	Discodorididae	Diaulula	odonoghuei		species		(Steinberg, 1963)
	imerss.org:PMLS:1600					Charlie Gibbs								PRESENT				Acanthodoris hudsoni					iNaturalist:48447								Acanthodoris hudsoni							Animalia	Mollusca	Gastropoda	Nudibranchia	Onchidorididae	Acanthodoris	hudsoni		species		MacFarland, 1905
	imerss.org:PMLS:1601					Charlie Gibbs								PRESENT				Limacia cockerelli					iNaturalist:538830								Limacia cockerelli							Animalia	Mollusca	Gastropoda	Nudibranchia	Polyceridae	Limacia	cockerelli		species		(MacFarland, 1905)
	imerss.org:PMLS:1602					Charlie Gibbs								PRESENT				Dendronotus iris					iNaturalist:47706								Dendronotus iris							Animalia	Mollusca	Gastropoda	Nudibranchia	Dendronotidae	Dendronotus	iris		species		J. G. Cooper, 1863
	imerss.org:PMLS:1603					Charlie Gibbs								PRESENT				Dirona albolineata					iNaturalist:47477								Dirona albolineata							Animalia	Mollusca	Gastropoda	Nudibranchia	Dironidae	Dirona	albolineata		species		MacFarland, 1905
	imerss.org:PMLS:1680					Charlie Gibbs								PRESENT				Tonicella lineata					iNaturalist:47425								Tonicella lineata							Animalia	Mollusca	Polyplacophora	Chitonida	Tonicellidae	Tonicella	lineata		species		(Wood, 1815)
	imerss.org:PMLS:1681					Charlie Gibbs								PRESENT				Tonicella insignis					iNaturalist:498132								Tonicella insignis							Animalia	Mollusca	Polyplacophora	Chitonida	Tonicellidae	Tonicella	insignis		species		(Reeve, 1847)
	imerss.org:PMLS:1682					Charlie Gibbs								PRESENT				Mopalia sp.					iNaturalist:47630								Mopalia							Animalia	Mollusca	Polyplacophora	Chitonida	Mopaliidae	Mopalia			genus
	imerss.org:PMLS:1683					Charlie Gibbs								PRESENT				Cryptochiton stelleri					iNaturalist:49053								Cryptochiton stelleri							Animalia	Mollusca	Polyplacophora	Chitonida	Acanthochitonidae	Cryptochiton	stelleri		species		(Middendorff, 1847)
	imerss.org:PMLS:1684					Charlie Gibbs								PRESENT				Chlamys sp.					iNaturalist:84497								Chlamys							Animalia	Mollusca	Bivalvia	Pectinida	Pectinidae	Chlamys			genus
	imerss.org:PMLS:1685					Charlie Gibbs								PRESENT				Crassadoma gigantea					iNaturalist:54526								Crassadoma gigantea							Animalia	Mollusca	Bivalvia	Pectinida	Pectinidae	Crassadoma	gigantea		species		(J.E. Gray, 1825)
	imerss.org:PMLS:1686					Charlie Gibbs								PRESENT				Entodesma navicula					iNaturalist:339164								Entodesma navicula							Animalia	Mollusca	Bivalvia		Lyonsiidae	Entodesma	navicula		species		(Adams & Reeve, 1850)
	imerss.org:PMLS:1687					Charlie Gibbs								PRESENT				Ceratostoma foliatum					iNaturalist:116687								Ceratostoma foliatum							Animalia	Mollusca	Gastropoda	Neogastropoda	Muricidae	Ceratostoma	foliatum		species		(Gmelin, 1791)
	imerss.org:PMLS:1688					Charlie Gibbs								PRESENT				Calliostoma ligatum					iNaturalist:129920								Calliostoma ligatum							Animalia	Mollusca	Gastropoda	Trochida	Calliostomatidae	Calliostoma	ligatum		species		(Gould, 1849)
	imerss.org:PMLS:1689					Charlie Gibbs								PRESENT				Diaulula odonoghuei					iNaturalist:508237								Diaulula odonoghuei							Animalia	Mollusca	Gastropoda	Nudibranchia	Discodorididae	Diaulula	odonoghuei		species		(Steinberg, 1963)
	imerss.org:PMLS:1690					Charlie Gibbs								PRESENT				Cadlina luteomarginata complex					iNaturalist:50146								Cadlina luteomarginata							Animalia	Mollusca	Gastropoda	Nudibranchia	Cadlinidae	Cadlina	luteomarginata		species		MacFarland, 1966
	imerss.org:PMLS:1691					Charlie Gibbs								PRESENT				Acanthodoris nanaimoensis					iNaturalist:47476								Acanthodoris nanaimoensis							Animalia	Mollusca	Gastropoda	Nudibranchia	Onchidorididae	Acanthodoris	nanaimoensis		species		O'Donoghue, 1921
	imerss.org:PMLS:1692					Charlie Gibbs								PRESENT				Dirona albolineata					iNaturalist:47477								Dirona albolineata							Animalia	Mollusca	Gastropoda	Nudibranchia	Dironidae	Dirona	albolineata		species		MacFarland, 1905
	imerss.org:PMLS:1764					Charlie Gibbs								PRESENT				Tonicella insignis					iNaturalist:498132								Tonicella insignis							Animalia	Mollusca	Polyplacophora	Chitonida	Tonicellidae	Tonicella	insignis		species		(Reeve, 1847)
	imerss.org:PMLS:1765					Charlie Gibbs								PRESENT				Tonicella lineata					iNaturalist:47425								Tonicella lineata							Animalia	Mollusca	Polyplacophora	Chitonida	Tonicellidae	Tonicella	lineata		species		(Wood, 1815)
	imerss.org:PMLS:1766					Charlie Gibbs								PRESENT				Mopalia sp.					iNaturalist:47630								Mopalia							Animalia	Mollusca	Polyplacophora	Chitonida	Mopaliidae	Mopalia			genus
	imerss.org:PMLS:1767					Charlie Gibbs								PRESENT				Neverita lewisii					iNaturalist:447427								Neverita lewisii							Animalia	Mollusca	Gastropoda	Littorinimorpha	Naticidae	Neverita	lewisii		species		(Gould, 1847)
	imerss.org:PMLS:1768					Charlie Gibbs								PRESENT				Limacia cockerelli					iNaturalist:538830								Limacia cockerelli							Animalia	Mollusca	Gastropoda	Nudibranchia	Polyceridae	Limacia	cockerelli		species		(MacFarland, 1905)
	imerss.org:PMLS:1769					Charlie Gibbs								PRESENT				Cadlina luteomarginata complex					iNaturalist:50146								Cadlina luteomarginata							Animalia	Mollusca	Gastropoda	Nudibranchia	Cadlinidae	Cadlina	luteomarginata		species		MacFarland, 1966
	imerss.org:PMLS:1770					Charlie Gibbs								PRESENT				Diaulula odonoghuei					iNaturalist:508237								Diaulula odonoghuei							Animalia	Mollusca	Gastropoda	Nudibranchia	Discodorididae	Diaulula	odonoghuei		species		(Steinberg, 1963)
	imerss.org:PMLS:1771					Charlie Gibbs								PRESENT				Dendronotus iris					iNaturalist:47706								Dendronotus iris							Animalia	Mollusca	Gastropoda	Nudibranchia	Dendronotidae	Dendronotus	iris		species		J. G. Cooper, 1863
	imerss.org:PMLS:1772					Charlie Gibbs								PRESENT				Mytilus edulis complex					iNaturalist:1108240								Mytilus edulis							Animalia	Mollusca	Bivalvia	Mytilida	Mytilidae	Mytilus	edulis		species
	imerss.org:PMLS:1773					Charlie Gibbs								PRESENT				Chlamys sp.					iNaturalist:84497								Chlamys							Animalia	Mollusca	Bivalvia	Pectinida	Pectinidae	Chlamys			genus
	imerss.org:PMLS:1774					Charlie Gibbs								PRESENT				Crassadoma gigantea					iNaturalist:54526								Crassadoma gigantea							Animalia	Mollusca	Bivalvia	Pectinida	Pectinidae	Crassadoma	gigantea		species		(J.E. Gray, 1825)
	imerss.org:PMLS:1775					Charlie Gibbs								PRESENT				Pododesmus macrochisma					iNaturalist:68652								Pododesmus macrochisma							Animalia	Mollusca	Bivalvia	Pectinida	Anomiidae	Pododesmus	macrochisma		species		(Deshayes, 1839)
	imerss.org:PMLS:1776					Charlie Gibbs								PRESENT				Tresus capax					iNaturalist:126927								Tresus capax							Animalia	Mollusca	Bivalvia	Venerida	Mactridae	Tresus	capax		species		(Gould, 1850)
	imerss.org:PMLS:1777					Charlie Gibbs								PRESENT				Panopea generosa					iNaturalist:117618								Panopea generosa							Animalia	Mollusca	Bivalvia	Adapedonta	Hiatellidae	Panopea	generosa		species		Gould, 1850
	imerss.org:PMLS:1778					Charlie Gibbs								PRESENT				Entodesma navicula					iNaturalist:339164								Entodesma navicula							Animalia	Mollusca	Bivalvia		Lyonsiidae	Entodesma	navicula		species		(Adams & Reeve, 1850)
	imerss.org:PMLS:1779					Charlie Gibbs								PRESENT				Rossia pacifica					iNaturalist:151358								Rossia pacifica							Animalia	Mollusca	Cephalopoda	Sepiida	Sepiolidae	Rossia	pacifica		species		Berry, 1911
	imerss.org:PMLS:1780					Charlie Gibbs								PRESENT				Octopus rubescens					iNaturalist:47455								Octopus rubescens							Animalia	Mollusca	Cephalopoda	Octopoda	Octopodidae	Octopus	rubescens		species		Berry, 1953
	imerss.org:PMLS:1854					Charlie Gibbs								PRESENT				Tonicella lineata					iNaturalist:47425								Tonicella lineata							Animalia	Mollusca	Polyplacophora	Chitonida	Tonicellidae	Tonicella	lineata		species		(Wood, 1815)
	imerss.org:PMLS:1855					Charlie Gibbs								PRESENT				Tonicella insignis					iNaturalist:498132								Tonicella insignis							Animalia	Mollusca	Polyplacophora	Chitonida	Tonicellidae	Tonicella	insignis		species		(Reeve, 1847)
	imerss.org:PMLS:1856					Charlie Gibbs								PRESENT				Mopalia sp.					iNaturalist:47630								Mopalia							Animalia	Mollusca	Polyplacophora	Chitonida	Mopaliidae	Mopalia			genus
	imerss.org:PMLS:1857					Charlie Gibbs								PRESENT				Cryptochiton stelleri					iNaturalist:49053								Cryptochiton stelleri							Animalia	Mollusca	Polyplacophora	Chitonida	Acanthochitonidae	Cryptochiton	stelleri		species		(Middendorff, 1847)
	imerss.org:PMLS:1858					Charlie Gibbs								PRESENT				Chlamys sp.					iNaturalist:84497								Chlamys							Animalia	Mollusca	Bivalvia	Pectinida	Pectinidae	Chlamys			genus
	imerss.org:PMLS:1859					Charlie Gibbs								PRESENT				Entodesma navicula					iNaturalist:339164								Entodesma navicula							Animalia	Mollusca	Bivalvia		Lyonsiidae	Entodesma	navicula		species		(Adams & Reeve, 1850)
	imerss.org:PMLS:1860					Charlie Gibbs								PRESENT				Acmaea mitra					iNaturalist:47676								Acmaea mitra							Animalia	Mollusca	Gastropoda		Acmaeidae	Acmaea	mitra		species		Rathke, 1833
	imerss.org:PMLS:1861					Charlie Gibbs								PRESENT				Crepidula norrisiarum					iNaturalist:485954								Crepidula norrisiarum							Animalia	Mollusca	Gastropoda	Littorinimorpha	Calyptraeidae	Crepidula	norrisiarum		species		Williamson, 1905
	imerss.org:PMLS:1862					Charlie Gibbs								PRESENT				Ceratostoma foliatum					iNaturalist:116687								Ceratostoma foliatum							Animalia	Mollusca	Gastropoda	Neogastropoda	Muricidae	Ceratostoma	foliatum		species		(Gmelin, 1791)
	imerss.org:PMLS:1863					Charlie Gibbs								PRESENT				Calliostoma ligatum					iNaturalist:129920								Calliostoma ligatum							Animalia	Mollusca	Gastropoda	Trochida	Calliostomatidae	Calliostoma	ligatum		species		(Gould, 1849)
	imerss.org:PMLS:1864					Charlie Gibbs								PRESENT				Doris montereyensis					iNaturalist:47469								Doris montereyensis							Animalia	Mollusca	Gastropoda	Nudibranchia	Dorididae	Doris	montereyensis		species		J. G. Cooper, 1863
	imerss.org:PMLS:1865					Charlie Gibbs								PRESENT				Diaulula odonoghuei					iNaturalist:508237								Diaulula odonoghuei							Animalia	Mollusca	Gastropoda	Nudibranchia	Discodorididae	Diaulula	odonoghuei		species		(Steinberg, 1963)
	imerss.org:PMLS:1866					Charlie Gibbs								PRESENT				Cadlina luteomarginata complex					iNaturalist:50146								Cadlina luteomarginata							Animalia	Mollusca	Gastropoda	Nudibranchia	Cadlinidae	Cadlina	luteomarginata		species		MacFarland, 1966
	imerss.org:PMLS:1867					Charlie Gibbs								PRESENT				Acanthodoris nanaimoensis					iNaturalist:47476								Acanthodoris nanaimoensis							Animalia	Mollusca	Gastropoda	Nudibranchia	Onchidorididae	Acanthodoris	nanaimoensis		species		O'Donoghue, 1921
	imerss.org:PMLS:1868					Charlie Gibbs								PRESENT				Hermissenda crassicornis					iNaturalist:495552								Hermissenda crassicornis							Animalia	Mollusca	Gastropoda	Nudibranchia	Myrrhinidae	Hermissenda	crassicornis		species		(Eschscholtz, 1831)
	imerss.org:PMLS:1929					Charlie Gibbs								PRESENT				Tonicella lineata					iNaturalist:47425								Tonicella lineata							Animalia	Mollusca	Polyplacophora	Chitonida	Tonicellidae	Tonicella	lineata		species		(Wood, 1815)
	imerss.org:PMLS:1930					Charlie Gibbs								PRESENT				Tonicella insignis					iNaturalist:498132								Tonicella insignis							Animalia	Mollusca	Polyplacophora	Chitonida	Tonicellidae	Tonicella	insignis		species		(Reeve, 1847)
	imerss.org:PMLS:1931					Charlie Gibbs								PRESENT				Mopalia sp.					iNaturalist:47630								Mopalia							Animalia	Mollusca	Polyplacophora	Chitonida	Mopaliidae	Mopalia			genus
	imerss.org:PMLS:1932					Charlie Gibbs								PRESENT				Cryptochiton stelleri					iNaturalist:49053								Cryptochiton stelleri							Animalia	Mollusca	Polyplacophora	Chitonida	Acanthochitonidae	Cryptochiton	stelleri		species		(Middendorff, 1847)
	imerss.org:PMLS:1933					Charlie Gibbs								PRESENT				Chlamys sp.					iNaturalist:84497								Chlamys							Animalia	Mollusca	Bivalvia	Pectinida	Pectinidae	Chlamys			genus
	imerss.org:PMLS:1934					Charlie Gibbs								PRESENT				Pododesmus macrochisma					iNaturalist:68652								Pododesmus macrochisma							Animalia	Mollusca	Bivalvia	Pectinida	Anomiidae	Pododesmus	macrochisma		species		(Deshayes, 1839)
	imerss.org:PMLS:1935					Charlie Gibbs								PRESENT				Tresus capax					iNaturalist:126927								Tresus capax							Animalia	Mollusca	Bivalvia	Venerida	Mactridae	Tresus	capax		species		(Gould, 1850)
	imerss.org:PMLS:1936					Charlie Gibbs								PRESENT				Entodesma navicula					iNaturalist:339164								Entodesma navicula							Animalia	Mollusca	Bivalvia		Lyonsiidae	Entodesma	navicula		species		(Adams & Reeve, 1850)
	imerss.org:PMLS:1937					Charlie Gibbs								PRESENT				Acmaea mitra					iNaturalist:47676								Acmaea mitra							Animalia	Mollusca	Gastropoda		Acmaeidae	Acmaea	mitra		species		Rathke, 1833
	imerss.org:PMLS:1938					Charlie Gibbs								PRESENT				Crepidula norrisiarum					iNaturalist:485954								Crepidula norrisiarum							Animalia	Mollusca	Gastropoda	Littorinimorpha	Calyptraeidae	Crepidula	norrisiarum		species		Williamson, 1905
	imerss.org:PMLS:1939					Charlie Gibbs								PRESENT				Ceratostoma foliatum					iNaturalist:116687								Ceratostoma foliatum							Animalia	Mollusca	Gastropoda	Neogastropoda	Muricidae	Ceratostoma	foliatum		species		(Gmelin, 1791)
	imerss.org:PMLS:1940					Charlie Gibbs								PRESENT				Calliostoma ligatum					iNaturalist:129920								Calliostoma ligatum							Animalia	Mollusca	Gastropoda	Trochida	Calliostomatidae	Calliostoma	ligatum		species		(Gould, 1849)
	imerss.org:PMLS:1941					Charlie Gibbs								PRESENT				Neverita lewisii					iNaturalist:447427								Neverita lewisii							Animalia	Mollusca	Gastropoda	Littorinimorpha	Naticidae	Neverita	lewisii		species		(Gould, 1847)
	imerss.org:PMLS:1942					Charlie Gibbs								PRESENT				Doris montereyensis					iNaturalist:47469								Doris montereyensis							Animalia	Mollusca	Gastropoda	Nudibranchia	Dorididae	Doris	montereyensis		species		J. G. Cooper, 1863
	imerss.org:PMLS:1943					Charlie Gibbs								PRESENT				Diaulula odonoghuei					iNaturalist:508237								Diaulula odonoghuei							Animalia	Mollusca	Gastropoda	Nudibranchia	Discodorididae	Diaulula	odonoghuei		species		(Steinberg, 1963)
	imerss.org:PMLS:1944					Charlie Gibbs								PRESENT				Cadlina luteomarginata complex					iNaturalist:50146								Cadlina luteomarginata							Animalia	Mollusca	Gastropoda	Nudibranchia	Cadlinidae	Cadlina	luteomarginata		species		MacFarland, 1966
	imerss.org:PMLS:1945					Charlie Gibbs								PRESENT				Dirona albolineata					iNaturalist:47477								Dirona albolineata							Animalia	Mollusca	Gastropoda	Nudibranchia	Dironidae	Dirona	albolineata		species		MacFarland, 1905
	imerss.org:PMLS:2008					Charlie Gibbs								PRESENT				Tonicella lineata					iNaturalist:47425								Tonicella lineata							Animalia	Mollusca	Polyplacophora	Chitonida	Tonicellidae	Tonicella	lineata		species		(Wood, 1815)
	imerss.org:PMLS:2009					Charlie Gibbs								PRESENT				Mopalia sp.					iNaturalist:47630								Mopalia							Animalia	Mollusca	Polyplacophora	Chitonida	Mopaliidae	Mopalia			genus
	imerss.org:PMLS:2010					Charlie Gibbs								PRESENT				Cryptochiton stelleri					iNaturalist:49053								Cryptochiton stelleri							Animalia	Mollusca	Polyplacophora	Chitonida	Acanthochitonidae	Cryptochiton	stelleri		species		(Middendorff, 1847)
	imerss.org:PMLS:2011					Charlie Gibbs								PRESENT				Haliotis kamtschatkana					iNaturalist:56654								Haliotis kamtschatkana							Animalia	Mollusca	Gastropoda	Lepetellida	Haliotidae	Haliotis	kamtschatkana		species		Jonas, 1845
	imerss.org:PMLS:2012					Charlie Gibbs								PRESENT				Diodora aspera					iNaturalist:64148								Diodora aspera							Animalia	Mollusca	Gastropoda	Lepetellida	Fissurellidae	Diodora	aspera		species		(Rathke, 1833)
	imerss.org:PMLS:2013					Charlie Gibbs								PRESENT				Calliostoma ligatum					iNaturalist:129920								Calliostoma ligatum							Animalia	Mollusca	Gastropoda	Trochida	Calliostomatidae	Calliostoma	ligatum		species		(Gould, 1849)
	imerss.org:PMLS:2014					Charlie Gibbs								PRESENT				Acmaea mitra					iNaturalist:47676								Acmaea mitra							Animalia	Mollusca	Gastropoda		Acmaeidae	Acmaea	mitra		species		Rathke, 1833
	imerss.org:PMLS:2015					Charlie Gibbs								PRESENT				Crepidula norrisiarum					iNaturalist:485954								Crepidula norrisiarum							Animalia	Mollusca	Gastropoda	Littorinimorpha	Calyptraeidae	Crepidula	norrisiarum		species		Williamson, 1905
	imerss.org:PMLS:2016					Charlie Gibbs								PRESENT				Ceratostoma foliatum					iNaturalist:116687								Ceratostoma foliatum							Animalia	Mollusca	Gastropoda	Neogastropoda	Muricidae	Ceratostoma	foliatum		species		(Gmelin, 1791)
	imerss.org:PMLS:2017					Charlie Gibbs								PRESENT				Cadlina luteomarginata complex					iNaturalist:50146								Cadlina luteomarginata							Animalia	Mollusca	Gastropoda	Nudibranchia	Cadlinidae	Cadlina	luteomarginata		species		MacFarland, 1966
	imerss.org:PMLS:2018			Count: many		Charlie Gibbs								PRESENT				Aldisa cooperi					iNaturalist:50097								Aldisa cooperi							Animalia	Mollusca	Gastropoda	Nudibranchia	Cadlinidae	Aldisa	cooperi		species		Robilliard & Baba, 1972
	imerss.org:PMLS:2019					Charlie Gibbs								PRESENT				Doris montereyensis					iNaturalist:47469								Doris montereyensis							Animalia	Mollusca	Gastropoda	Nudibranchia	Dorididae	Doris	montereyensis		species		J. G. Cooper, 1863
	imerss.org:PMLS:2020					Charlie Gibbs								PRESENT				Dendronotus albus					iNaturalist:47773								Dendronotus albus							Animalia	Mollusca	Gastropoda	Nudibranchia	Dendronotidae	Dendronotus	albus		species		MacFarland, 1966
	imerss.org:PMLS:2021					Charlie Gibbs								PRESENT				Orienthella trilineata					iNaturalist:764704								Orienthella trilineata							Animalia	Mollusca	Gastropoda	Nudibranchia	Coryphellidae	Orienthella	trilineata		species		(O'Donoghue, 1921)
	imerss.org:PMLS:2022					Charlie Gibbs								PRESENT				Hermissenda crassicornis					iNaturalist:495552								Hermissenda crassicornis							Animalia	Mollusca	Gastropoda	Nudibranchia	Myrrhinidae	Hermissenda	crassicornis		species		(Eschscholtz, 1831)
	imerss.org:PMLS:2023					Charlie Gibbs								PRESENT				Chlamys sp.					iNaturalist:84497								Chlamys							Animalia	Mollusca	Bivalvia	Pectinida	Pectinidae	Chlamys			genus
	imerss.org:PMLS:2024					Charlie Gibbs								PRESENT				Crassadoma gigantea					iNaturalist:54526								Crassadoma gigantea							Animalia	Mollusca	Bivalvia	Pectinida	Pectinidae	Crassadoma	gigantea		species		(J.E. Gray, 1825)
	imerss.org:PMLS:2025					Charlie Gibbs								PRESENT				Pododesmus macrochisma					iNaturalist:68652								Pododesmus macrochisma							Animalia	Mollusca	Bivalvia	Pectinida	Anomiidae	Pododesmus	macrochisma		species		(Deshayes, 1839)
	imerss.org:PMLS:2026					Charlie Gibbs								PRESENT				Entodesma navicula					iNaturalist:339164								Entodesma navicula							Animalia	Mollusca	Bivalvia		Lyonsiidae	Entodesma	navicula		species		(Adams & Reeve, 1850)
	imerss.org:PMLS:2105					Charlie Gibbs								PRESENT				Tonicella lineata					iNaturalist:47425								Tonicella lineata							Animalia	Mollusca	Polyplacophora	Chitonida	Tonicellidae	Tonicella	lineata		species		(Wood, 1815)
	imerss.org:PMLS:2106					Charlie Gibbs								PRESENT				Tonicella insignis					iNaturalist:498132								Tonicella insignis							Animalia	Mollusca	Polyplacophora	Chitonida	Tonicellidae	Tonicella	insignis		species		(Reeve, 1847)
	imerss.org:PMLS:2107					Charlie Gibbs								PRESENT				Chlamys sp.					iNaturalist:84497								Chlamys							Animalia	Mollusca	Bivalvia	Pectinida	Pectinidae	Chlamys			genus
	imerss.org:PMLS:2108					Charlie Gibbs								PRESENT				Crassadoma gigantea					iNaturalist:54526								Crassadoma gigantea							Animalia	Mollusca	Bivalvia	Pectinida	Pectinidae	Crassadoma	gigantea		species		(J.E. Gray, 1825)
	imerss.org:PMLS:2109					Charlie Gibbs								PRESENT				Pododesmus macrochisma					iNaturalist:68652								Pododesmus macrochisma							Animalia	Mollusca	Bivalvia	Pectinida	Anomiidae	Pododesmus	macrochisma		species		(Deshayes, 1839)
	imerss.org:PMLS:2110					Charlie Gibbs								PRESENT				Tresus capax					iNaturalist:126927								Tresus capax							Animalia	Mollusca	Bivalvia	Venerida	Mactridae	Tresus	capax		species		(Gould, 1850)
	imerss.org:PMLS:2111					Charlie Gibbs								PRESENT				Ceratostoma foliatum					iNaturalist:116687								Ceratostoma foliatum							Animalia	Mollusca	Gastropoda	Neogastropoda	Muricidae	Ceratostoma	foliatum		species		(Gmelin, 1791)
	imerss.org:PMLS:2112					Charlie Gibbs								PRESENT				Calliostoma ligatum					iNaturalist:129920								Calliostoma ligatum							Animalia	Mollusca	Gastropoda	Trochida	Calliostomatidae	Calliostoma	ligatum		species		(Gould, 1849)
	imerss.org:PMLS:2113					Charlie Gibbs								PRESENT				Neverita lewisii					iNaturalist:447427								Neverita lewisii							Animalia	Mollusca	Gastropoda	Littorinimorpha	Naticidae	Neverita	lewisii		species		(Gould, 1847)
	imerss.org:PMLS:2114					Charlie Gibbs								PRESENT				Peltodoris nobilis					iNaturalist:48450								Peltodoris nobilis							Animalia	Mollusca	Gastropoda	Nudibranchia	Discodorididae	Peltodoris	nobilis		species		(MacFarland, 1905)
	imerss.org:PMLS:2115					Charlie Gibbs								PRESENT				Doris montereyensis					iNaturalist:47469								Doris montereyensis							Animalia	Mollusca	Gastropoda	Nudibranchia	Dorididae	Doris	montereyensis		species		J. G. Cooper, 1863
	imerss.org:PMLS:2116					Charlie Gibbs								PRESENT				Cadlina luteomarginata complex					iNaturalist:50146								Cadlina luteomarginata							Animalia	Mollusca	Gastropoda	Nudibranchia	Cadlinidae	Cadlina	luteomarginata		species		MacFarland, 1966
	imerss.org:PMLS:2117					Charlie Gibbs								PRESENT				Dirona albolineata					iNaturalist:47477								Dirona albolineata							Animalia	Mollusca	Gastropoda	Nudibranchia	Dironidae	Dirona	albolineata		species		MacFarland, 1905
	imerss.org:PMLS:2118					Charlie Gibbs								PRESENT				Aeolidia papillosa					iNaturalist:498116								Aeolidia papillosa							Animalia	Mollusca	Gastropoda	Nudibranchia	Aeolidiidae	Aeolidia	papillosa		species		(Linnaeus, 1761)
	imerss.org:PMLS:2119					Charlie Gibbs								PRESENT				Rossia pacifica					iNaturalist:151358								Rossia pacifica							Animalia	Mollusca	Cephalopoda	Sepiida	Sepiolidae	Rossia	pacifica		species		Berry, 1911
	imerss.org:PMLS:2206					Charlie Gibbs								PRESENT				Tonicella lineata					iNaturalist:47425								Tonicella lineata							Animalia	Mollusca	Polyplacophora	Chitonida	Tonicellidae	Tonicella	lineata		species		(Wood, 1815)
	imerss.org:PMLS:2207					Charlie Gibbs								PRESENT				Mopalia sp.					iNaturalist:47630								Mopalia							Animalia	Mollusca	Polyplacophora	Chitonida	Mopaliidae	Mopalia			genus
	imerss.org:PMLS:2208					Charlie Gibbs								PRESENT				Cryptochiton stelleri					iNaturalist:49053								Cryptochiton stelleri							Animalia	Mollusca	Polyplacophora	Chitonida	Acanthochitonidae	Cryptochiton	stelleri		species		(Middendorff, 1847)
	imerss.org:PMLS:2209					Charlie Gibbs								PRESENT				Haliotis kamtschatkana					iNaturalist:56654								Haliotis kamtschatkana							Animalia	Mollusca	Gastropoda	Lepetellida	Haliotidae	Haliotis	kamtschatkana		species		Jonas, 1845
	imerss.org:PMLS:2210					Charlie Gibbs								PRESENT				Diodora aspera					iNaturalist:64148								Diodora aspera							Animalia	Mollusca	Gastropoda	Lepetellida	Fissurellidae	Diodora	aspera		species		(Rathke, 1833)
	imerss.org:PMLS:2211					Charlie Gibbs								PRESENT				Puncturella cucullata					iNaturalist:904312								Puncturella cucullata							Animalia	Mollusca	Gastropoda	Lepetellida	Fissurellidae	Puncturella	cucullata		species		(Gould, 1846)
	imerss.org:PMLS:2212					Charlie Gibbs								PRESENT				Calliostoma ligatum					iNaturalist:129920								Calliostoma ligatum							Animalia	Mollusca	Gastropoda	Trochida	Calliostomatidae	Calliostoma	ligatum		species		(Gould, 1849)
	imerss.org:PMLS:2213					Charlie Gibbs								PRESENT				Acmaea mitra					iNaturalist:47676								Acmaea mitra							Animalia	Mollusca	Gastropoda		Acmaeidae	Acmaea	mitra		species		Rathke, 1833
	imerss.org:PMLS:2214					Charlie Gibbs								PRESENT				Ceratostoma foliatum					iNaturalist:116687								Ceratostoma foliatum							Animalia	Mollusca	Gastropoda	Neogastropoda	Muricidae	Ceratostoma	foliatum		species		(Gmelin, 1791)
	imerss.org:PMLS:2215					Charlie Gibbs								PRESENT				Cadlina luteomarginata complex					iNaturalist:50146								Cadlina luteomarginata							Animalia	Mollusca	Gastropoda	Nudibranchia	Cadlinidae	Cadlina	luteomarginata		species		MacFarland, 1966
	imerss.org:PMLS:2216					Charlie Gibbs								PRESENT				Peltodoris nobilis					iNaturalist:48450								Peltodoris nobilis							Animalia	Mollusca	Gastropoda	Nudibranchia	Discodorididae	Peltodoris	nobilis		species		(MacFarland, 1905)
	imerss.org:PMLS:2217					Charlie Gibbs								PRESENT				Tochuina gigantea					iNaturalist:873733								Tochuina gigantea							Animalia	Mollusca	Gastropoda	Nudibranchia	Tritoniidae	Tochuina	gigantea		species		(Bergh, 1904)
	imerss.org:PMLS:2218					Charlie Gibbs								PRESENT				Dirona albolineata					iNaturalist:47477								Dirona albolineata							Animalia	Mollusca	Gastropoda	Nudibranchia	Dironidae	Dirona	albolineata		species		MacFarland, 1905
	imerss.org:PMLS:2219					Charlie Gibbs								PRESENT				Himatina trophina					iNaturalist:633561								Himatina trophina							Animalia	Mollusca	Gastropoda	Nudibranchia	Coryphellidae	Himatina	trophina		species		(Bergh, 1890)
	imerss.org:PMLS:2220					Charlie Gibbs								PRESENT				Orienthella trilineata					iNaturalist:764704								Orienthella trilineata							Animalia	Mollusca	Gastropoda	Nudibranchia	Coryphellidae	Orienthella	trilineata		species		(O'Donoghue, 1921)
	imerss.org:PMLS:2221					Charlie Gibbs								PRESENT				Hermissenda crassicornis					iNaturalist:495552								Hermissenda crassicornis							Animalia	Mollusca	Gastropoda	Nudibranchia	Myrrhinidae	Hermissenda	crassicornis		species		(Eschscholtz, 1831)
	imerss.org:PMLS:2222					Charlie Gibbs								PRESENT				Chlamys sp.					iNaturalist:84497								Chlamys							Animalia	Mollusca	Bivalvia	Pectinida	Pectinidae	Chlamys			genus
	imerss.org:PMLS:2223					Charlie Gibbs								PRESENT				Crassadoma gigantea					iNaturalist:54526								Crassadoma gigantea							Animalia	Mollusca	Bivalvia	Pectinida	Pectinidae	Crassadoma	gigantea		species		(J.E. Gray, 1825)
	imerss.org:PMLS:2224					Charlie Gibbs								PRESENT				Tresus capax					iNaturalist:126927								Tresus capax							Animalia	Mollusca	Bivalvia	Venerida	Mactridae	Tresus	capax		species		(Gould, 1850)
	imerss.org:PMLS:2225					Charlie Gibbs								PRESENT				Entodesma navicula					iNaturalist:339164								Entodesma navicula							Animalia	Mollusca	Bivalvia		Lyonsiidae	Entodesma	navicula		species		(Adams & Reeve, 1850)
	imerss.org:PMLS:2301					Charlie Gibbs								PRESENT				Cryptochiton stelleri					iNaturalist:49053								Cryptochiton stelleri							Animalia	Mollusca	Polyplacophora	Chitonida	Acanthochitonidae	Cryptochiton	stelleri		species		(Middendorff, 1847)
	imerss.org:PMLS:2302					Charlie Gibbs								PRESENT				Fusitriton oregonensis					iNaturalist:448389								Fusitriton oregonensis							Animalia	Mollusca	Gastropoda	Littorinimorpha	Cymatiidae	Fusitriton	oregonensis		species		(Redfield, 1846)
	imerss.org:PMLS:2303					Charlie Gibbs								PRESENT				Ceratostoma foliatum					iNaturalist:116687								Ceratostoma foliatum							Animalia	Mollusca	Gastropoda	Neogastropoda	Muricidae	Ceratostoma	foliatum		species		(Gmelin, 1791)
	imerss.org:PMLS:2304					Charlie Gibbs								PRESENT				Aglaja ocelligera					iNaturalist:49842								Aglaja ocelligera							Animalia	Mollusca	Gastropoda	Cephalaspidea	Aglajidae	Aglaja	ocelligera		species		(Bergh, 1894)
	imerss.org:PMLS:2305					Charlie Gibbs								PRESENT				Phyllaplysia taylori					iNaturalist:49864								Phyllaplysia taylori							Animalia	Mollusca	Gastropoda	Aplysiida	Aplysiidae	Phyllaplysia	taylori		species		Dall, 1900
	imerss.org:PMLS:2306					Charlie Gibbs		2						PRESENT				Aegires albopunctatus					iNaturalist:48981								Aegires albopunctatus							Animalia	Mollusca	Gastropoda	Nudibranchia	Aegiridae	Aegires	albopunctatus		species		MacFarland, 1905
	imerss.org:PMLS:2307					Charlie Gibbs								PRESENT				Cadlina luteomarginata complex					iNaturalist:50146								Cadlina luteomarginata							Animalia	Mollusca	Gastropoda	Nudibranchia	Cadlinidae	Cadlina	luteomarginata		species		MacFarland, 1966
	imerss.org:PMLS:2308					Charlie Gibbs								PRESENT				Doris montereyensis					iNaturalist:47469								Doris montereyensis							Animalia	Mollusca	Gastropoda	Nudibranchia	Dorididae	Doris	montereyensis		species		J. G. Cooper, 1863
	imerss.org:PMLS:2309					Charlie Gibbs								PRESENT				Diaulula odonoghuei					iNaturalist:508237								Diaulula odonoghuei							Animalia	Mollusca	Gastropoda	Nudibranchia	Discodorididae	Diaulula	odonoghuei		species		(Steinberg, 1963)
	imerss.org:PMLS:2310					Charlie Gibbs								PRESENT				Dendronotus iris					iNaturalist:47706								Dendronotus iris							Animalia	Mollusca	Gastropoda	Nudibranchia	Dendronotidae	Dendronotus	iris		species		J. G. Cooper, 1863
	imerss.org:PMLS:2311					Charlie Gibbs								PRESENT				Hermissenda crassicornis					iNaturalist:495552								Hermissenda crassicornis							Animalia	Mollusca	Gastropoda	Nudibranchia	Myrrhinidae	Hermissenda	crassicornis		species		(Eschscholtz, 1831)
	imerss.org:PMLS:2312					Charlie Gibbs								PRESENT				Mytilus edulis complex					iNaturalist:1108240								Mytilus edulis							Animalia	Mollusca	Bivalvia	Mytilida	Mytilidae	Mytilus	edulis		species
	imerss.org:PMLS:2313					Charlie Gibbs								PRESENT				Chlamys sp.					iNaturalist:84497								Chlamys							Animalia	Mollusca	Bivalvia	Pectinida	Pectinidae	Chlamys			genus
	imerss.org:PMLS:2314					Charlie Gibbs								PRESENT				Crassadoma gigantea					iNaturalist:54526								Crassadoma gigantea							Animalia	Mollusca	Bivalvia	Pectinida	Pectinidae	Crassadoma	gigantea		species		(J.E. Gray, 1825)
	imerss.org:PMLS:2315					Charlie Gibbs								PRESENT				Clinocardium nuttallii					iNaturalist:69925								Clinocardium nuttallii							Animalia	Mollusca	Bivalvia	Cardiida	Cardiidae	Clinocardium	nuttallii		species		(Conrad, 1837)
	imerss.org:PMLS:2316					Charlie Gibbs								PRESENT				Tresus capax					iNaturalist:126927								Tresus capax							Animalia	Mollusca	Bivalvia	Venerida	Mactridae	Tresus	capax		species		(Gould, 1850)
	imerss.org:PMLS:2317					Charlie Gibbs								PRESENT				Enteroctopus dofleini					iNaturalist:48863								Enteroctopus dofleini							Animalia	Mollusca	Cephalopoda	Octopoda	Enteroctopodidae	Enteroctopus	dofleini		species		(Wülker, 1910)
	imerss.org:PMLS:2406					Charlie Gibbs								PRESENT				Tonicella insignis					iNaturalist:498132								Tonicella insignis							Animalia	Mollusca	Polyplacophora	Chitonida	Tonicellidae	Tonicella	insignis		species		(Reeve, 1847)
	imerss.org:PMLS:2407					Charlie Gibbs								PRESENT				Tonicella lineata					iNaturalist:47425								Tonicella lineata							Animalia	Mollusca	Polyplacophora	Chitonida	Tonicellidae	Tonicella	lineata		species		(Wood, 1815)
	imerss.org:PMLS:2408					Charlie Gibbs								PRESENT				Mopalia sp.					iNaturalist:47630								Mopalia							Animalia	Mollusca	Polyplacophora	Chitonida	Mopaliidae	Mopalia			genus
	imerss.org:PMLS:2409					Charlie Gibbs								PRESENT				Cryptochiton stelleri					iNaturalist:49053								Cryptochiton stelleri							Animalia	Mollusca	Polyplacophora	Chitonida	Acanthochitonidae	Cryptochiton	stelleri		species		(Middendorff, 1847)
	imerss.org:PMLS:2410					Charlie Gibbs								PRESENT				Puncturella cucullata					iNaturalist:904312								Puncturella cucullata							Animalia	Mollusca	Gastropoda	Lepetellida	Fissurellidae	Puncturella	cucullata		species		(Gould, 1846)
	imerss.org:PMLS:2411					Charlie Gibbs								PRESENT				Ceratostoma foliatum					iNaturalist:116687								Ceratostoma foliatum							Animalia	Mollusca	Gastropoda	Neogastropoda	Muricidae	Ceratostoma	foliatum		species		(Gmelin, 1791)
	imerss.org:PMLS:2412					Charlie Gibbs								PRESENT				Acanthodoris nanaimoensis					iNaturalist:47476								Acanthodoris nanaimoensis							Animalia	Mollusca	Gastropoda	Nudibranchia	Onchidorididae	Acanthodoris	nanaimoensis		species		O'Donoghue, 1921
	imerss.org:PMLS:2413					Charlie Gibbs								PRESENT				Adalaria spp.					iNaturalist:554476								Adalaria							Animalia	Mollusca	Gastropoda	Nudibranchia	Onchidorididae	Adalaria			genus
	imerss.org:PMLS:2414					Charlie Gibbs								PRESENT				Cadlina luteomarginata complex					iNaturalist:50146								Cadlina luteomarginata							Animalia	Mollusca	Gastropoda	Nudibranchia	Cadlinidae	Cadlina	luteomarginata		species		MacFarland, 1966
	imerss.org:PMLS:2415					Charlie Gibbs								PRESENT				Diaulula odonoghuei					iNaturalist:508237								Diaulula odonoghuei							Animalia	Mollusca	Gastropoda	Nudibranchia	Discodorididae	Diaulula	odonoghuei		species		(Steinberg, 1963)
	imerss.org:PMLS:2416					Charlie Gibbs								PRESENT				Dendronotus rufus					iNaturalist:50393								Dendronotus rufus							Animalia	Mollusca	Gastropoda	Nudibranchia	Dendronotidae	Dendronotus	rufus		species		O'Donoghue, 1921
	imerss.org:PMLS:2417					Charlie Gibbs								PRESENT				Dendronotus albus					iNaturalist:47773								Dendronotus albus							Animalia	Mollusca	Gastropoda	Nudibranchia	Dendronotidae	Dendronotus	albus		species		MacFarland, 1966
	imerss.org:PMLS:2418					Charlie Gibbs								PRESENT				Dirona albolineata					iNaturalist:47477								Dirona albolineata							Animalia	Mollusca	Gastropoda	Nudibranchia	Dironidae	Dirona	albolineata		species		MacFarland, 1905
	imerss.org:PMLS:2419					Charlie Gibbs								PRESENT				Himatina trophina					iNaturalist:633561								Himatina trophina							Animalia	Mollusca	Gastropoda	Nudibranchia	Coryphellidae	Himatina	trophina		species		(Bergh, 1890)
	imerss.org:PMLS:2420					Charlie Gibbs								PRESENT				Hermissenda crassicornis					iNaturalist:495552								Hermissenda crassicornis							Animalia	Mollusca	Gastropoda	Nudibranchia	Myrrhinidae	Hermissenda	crassicornis		species		(Eschscholtz, 1831)
	imerss.org:PMLS:2421					Charlie Gibbs								PRESENT				Chlamys sp.					iNaturalist:84497								Chlamys							Animalia	Mollusca	Bivalvia	Pectinida	Pectinidae	Chlamys			genus
	imerss.org:PMLS:2422					Charlie Gibbs								PRESENT				Crassadoma gigantea					iNaturalist:54526								Crassadoma gigantea							Animalia	Mollusca	Bivalvia	Pectinida	Pectinidae	Crassadoma	gigantea		species		(J.E. Gray, 1825)
	imerss.org:PMLS:2423					Charlie Gibbs								PRESENT				Pododesmus macrochisma					iNaturalist:68652								Pododesmus macrochisma							Animalia	Mollusca	Bivalvia	Pectinida	Anomiidae	Pododesmus	macrochisma		species		(Deshayes, 1839)
	imerss.org:PMLS:2424					Charlie Gibbs								PRESENT				Enteroctopus dofleini					iNaturalist:48863								Enteroctopus dofleini							Animalia	Mollusca	Cephalopoda	Octopoda	Enteroctopodidae	Enteroctopus	dofleini		species		(Wülker, 1910)
	imerss.org:PMLS:2500					Charlie Gibbs								PRESENT				Tonicella insignis					iNaturalist:498132								Tonicella insignis							Animalia	Mollusca	Polyplacophora	Chitonida	Tonicellidae	Tonicella	insignis		species		(Reeve, 1847)
	imerss.org:PMLS:2501					Charlie Gibbs								PRESENT				Tonicella lineata					iNaturalist:47425								Tonicella lineata							Animalia	Mollusca	Polyplacophora	Chitonida	Tonicellidae	Tonicella	lineata		species		(Wood, 1815)
	imerss.org:PMLS:2502					Charlie Gibbs								PRESENT				Mopalia sp.					iNaturalist:47630								Mopalia							Animalia	Mollusca	Polyplacophora	Chitonida	Mopaliidae	Mopalia			genus
	imerss.org:PMLS:2503					Charlie Gibbs								PRESENT				Cryptochiton stelleri					iNaturalist:49053								Cryptochiton stelleri							Animalia	Mollusca	Polyplacophora	Chitonida	Acanthochitonidae	Cryptochiton	stelleri		species		(Middendorff, 1847)
	imerss.org:PMLS:2504					Charlie Gibbs								PRESENT				Ceratostoma foliatum					iNaturalist:116687								Ceratostoma foliatum							Animalia	Mollusca	Gastropoda	Neogastropoda	Muricidae	Ceratostoma	foliatum		species		(Gmelin, 1791)
	imerss.org:PMLS:2505					Charlie Gibbs								PRESENT				Limacia cockerelli					iNaturalist:538830								Limacia cockerelli							Animalia	Mollusca	Gastropoda	Nudibranchia	Polyceridae	Limacia	cockerelli		species		(MacFarland, 1905)
	imerss.org:PMLS:2506					Charlie Gibbs								PRESENT				Cadlina luteomarginata complex					iNaturalist:50146								Cadlina luteomarginata							Animalia	Mollusca	Gastropoda	Nudibranchia	Cadlinidae	Cadlina	luteomarginata		species		MacFarland, 1966
	imerss.org:PMLS:2507					Charlie Gibbs								PRESENT				Doris montereyensis					iNaturalist:47469								Doris montereyensis							Animalia	Mollusca	Gastropoda	Nudibranchia	Dorididae	Doris	montereyensis		species		J. G. Cooper, 1863
	imerss.org:PMLS:2508					Charlie Gibbs								PRESENT				Dendronotus iris					iNaturalist:47706								Dendronotus iris							Animalia	Mollusca	Gastropoda	Nudibranchia	Dendronotidae	Dendronotus	iris		species		J. G. Cooper, 1863
	imerss.org:PMLS:2509					Charlie Gibbs								PRESENT				Dendronotus rufus					iNaturalist:50393								Dendronotus rufus							Animalia	Mollusca	Gastropoda	Nudibranchia	Dendronotidae	Dendronotus	rufus		species		O'Donoghue, 1921
	imerss.org:PMLS:2510					Charlie Gibbs								PRESENT				Dirona albolineata					iNaturalist:47477								Dirona albolineata							Animalia	Mollusca	Gastropoda	Nudibranchia	Dironidae	Dirona	albolineata		species		MacFarland, 1905
	imerss.org:PMLS:2511					Charlie Gibbs								PRESENT				Coryphella verrucosa					iNaturalist:633193								Coryphella verrucosa							Animalia	Mollusca	Gastropoda	Nudibranchia	Coryphellidae	Coryphella	verrucosa		species		(M. Sars, 1829)
	imerss.org:PMLS:2512					Charlie Gibbs								PRESENT				Chlamys sp.					iNaturalist:84497								Chlamys							Animalia	Mollusca	Bivalvia	Pectinida	Pectinidae	Chlamys			genus
	imerss.org:PMLS:2513					Charlie Gibbs								PRESENT				Pododesmus macrochisma					iNaturalist:68652								Pododesmus macrochisma							Animalia	Mollusca	Bivalvia	Pectinida	Anomiidae	Pododesmus	macrochisma		species		(Deshayes, 1839)
	imerss.org:PMLS:2587					Charlie Gibbs								PRESENT				Cryptochiton stelleri					iNaturalist:49053								Cryptochiton stelleri							Animalia	Mollusca	Polyplacophora	Chitonida	Acanthochitonidae	Cryptochiton	stelleri		species		(Middendorff, 1847)
	imerss.org:PMLS:2588					Charlie Gibbs								PRESENT				Diodora aspera					iNaturalist:64148								Diodora aspera							Animalia	Mollusca	Gastropoda	Lepetellida	Fissurellidae	Diodora	aspera		species		(Rathke, 1833)
	imerss.org:PMLS:2589					Charlie Gibbs								PRESENT				Ceratostoma foliatum					iNaturalist:116687								Ceratostoma foliatum							Animalia	Mollusca	Gastropoda	Neogastropoda	Muricidae	Ceratostoma	foliatum		species		(Gmelin, 1791)
	imerss.org:PMLS:2590					Charlie Gibbs								PRESENT				Gastropteron pacificum					iNaturalist:49839								Gastropteron pacificum							Animalia	Mollusca	Gastropoda	Cephalaspidea	Gastropteridae	Gastropteron	pacificum		species		Bergh, 1894
	imerss.org:PMLS:2591					Charlie Gibbs								PRESENT				Cadlina luteomarginata complex					iNaturalist:50146								Cadlina luteomarginata							Animalia	Mollusca	Gastropoda	Nudibranchia	Cadlinidae	Cadlina	luteomarginata		species		MacFarland, 1966
	imerss.org:PMLS:2592					Charlie Gibbs								PRESENT				Doris odhneri					iNaturalist:124210								Doris odhneri							Animalia	Mollusca	Gastropoda	Nudibranchia	Dorididae	Doris	odhneri		species		MacFarland, 1966
	imerss.org:PMLS:2593					Charlie Gibbs								PRESENT				Peltodoris nobilis					iNaturalist:48450								Peltodoris nobilis							Animalia	Mollusca	Gastropoda	Nudibranchia	Discodorididae	Peltodoris	nobilis		species		(MacFarland, 1905)
	imerss.org:PMLS:2594					Charlie Gibbs								PRESENT				Dendronotus rufus					iNaturalist:50393								Dendronotus rufus							Animalia	Mollusca	Gastropoda	Nudibranchia	Dendronotidae	Dendronotus	rufus		species		O'Donoghue, 1921
	imerss.org:PMLS:2595					Charlie Gibbs								PRESENT				Dirona albolineata					iNaturalist:47477								Dirona albolineata							Animalia	Mollusca	Gastropoda	Nudibranchia	Dironidae	Dirona	albolineata		species		MacFarland, 1905
	imerss.org:PMLS:2596					Charlie Gibbs								PRESENT				Crassadoma gigantea					iNaturalist:54526								Crassadoma gigantea							Animalia	Mollusca	Bivalvia	Pectinida	Pectinidae	Crassadoma	gigantea		species		(J.E. Gray, 1825)
	imerss.org:PMLS:2597					Charlie Gibbs								PRESENT				Pododesmus macrochisma					iNaturalist:68652								Pododesmus macrochisma							Animalia	Mollusca	Bivalvia	Pectinida	Anomiidae	Pododesmus	macrochisma		species		(Deshayes, 1839)
	imerss.org:PMLS:2598					Charlie Gibbs								PRESENT				Entodesma navicula					iNaturalist:339164								Entodesma navicula							Animalia	Mollusca	Bivalvia		Lyonsiidae	Entodesma	navicula		species		(Adams & Reeve, 1850)
	imerss.org:PMLS:2676					Charlie Gibbs								PRESENT				Tonicella insignis					iNaturalist:498132								Tonicella insignis							Animalia	Mollusca	Polyplacophora	Chitonida	Tonicellidae	Tonicella	insignis		species		(Reeve, 1847)
	imerss.org:PMLS:2677					Charlie Gibbs								PRESENT				Tonicella lineata					iNaturalist:47425								Tonicella lineata							Animalia	Mollusca	Polyplacophora	Chitonida	Tonicellidae	Tonicella	lineata		species		(Wood, 1815)
	imerss.org:PMLS:2678					Charlie Gibbs								PRESENT				Mopalia sp.					iNaturalist:47630								Mopalia							Animalia	Mollusca	Polyplacophora	Chitonida	Mopaliidae	Mopalia			genus
	imerss.org:PMLS:2679					Charlie Gibbs								PRESENT				Cryptochiton stelleri					iNaturalist:49053								Cryptochiton stelleri							Animalia	Mollusca	Polyplacophora	Chitonida	Acanthochitonidae	Cryptochiton	stelleri		species		(Middendorff, 1847)
	imerss.org:PMLS:2680					Charlie Gibbs								PRESENT				Euspira pallida					iNaturalist:873876								Euspira pallida							Animalia	Mollusca	Gastropoda	Littorinimorpha	Naticidae	Euspira	pallida		species		(Broderip & G. B. Sowerby I, 1829)
	imerss.org:PMLS:2681					Charlie Gibbs								PRESENT				Ceratostoma foliatum					iNaturalist:116687								Ceratostoma foliatum							Animalia	Mollusca	Gastropoda	Neogastropoda	Muricidae	Ceratostoma	foliatum		species		(Gmelin, 1791)
	imerss.org:PMLS:2682					Charlie Gibbs								PRESENT				Cadlina luteomarginata complex					iNaturalist:50146								Cadlina luteomarginata							Animalia	Mollusca	Gastropoda	Nudibranchia	Cadlinidae	Cadlina	luteomarginata		species		MacFarland, 1966
	imerss.org:PMLS:2683					Charlie Gibbs								PRESENT				Diaulula odonoghuei					iNaturalist:508237								Diaulula odonoghuei							Animalia	Mollusca	Gastropoda	Nudibranchia	Discodorididae	Diaulula	odonoghuei		species		(Steinberg, 1963)
	imerss.org:PMLS:2684					Charlie Gibbs								PRESENT				Dendronotus iris					iNaturalist:47706								Dendronotus iris							Animalia	Mollusca	Gastropoda	Nudibranchia	Dendronotidae	Dendronotus	iris		species		J. G. Cooper, 1863
	imerss.org:PMLS:2685					Charlie Gibbs								PRESENT				Dendronotus rufus					iNaturalist:50393								Dendronotus rufus							Animalia	Mollusca	Gastropoda	Nudibranchia	Dendronotidae	Dendronotus	rufus		species		O'Donoghue, 1921
	imerss.org:PMLS:2686					Charlie Gibbs								PRESENT				Armina californica					iNaturalist:47499								Armina californica							Animalia	Mollusca	Gastropoda	Nudibranchia	Arminidae	Armina	californica		species		(J. G. Cooper, 1863)
	imerss.org:PMLS:2687					Charlie Gibbs								PRESENT				Coryphella verrucosa					iNaturalist:633193								Coryphella verrucosa							Animalia	Mollusca	Gastropoda	Nudibranchia	Coryphellidae	Coryphella	verrucosa		species		(M. Sars, 1829)
	imerss.org:PMLS:2688					Charlie Gibbs								PRESENT				Crassadoma gigantea					iNaturalist:54526								Crassadoma gigantea							Animalia	Mollusca	Bivalvia	Pectinida	Pectinidae	Crassadoma	gigantea		species		(J.E. Gray, 1825)
	imerss.org:PMLS:2689					Charlie Gibbs								PRESENT				Pododesmus macrochisma					iNaturalist:68652								Pododesmus macrochisma							Animalia	Mollusca	Bivalvia	Pectinida	Anomiidae	Pododesmus	macrochisma		species		(Deshayes, 1839)
	imerss.org:PMLS:2690					Charlie Gibbs								PRESENT				Tresus capax					iNaturalist:126927								Tresus capax							Animalia	Mollusca	Bivalvia	Venerida	Mactridae	Tresus	capax		species		(Gould, 1850)
	imerss.org:PMLS:2691					Charlie Gibbs								PRESENT				Enteroctopus dofleini					iNaturalist:48863								Enteroctopus dofleini							Animalia	Mollusca	Cephalopoda	Octopoda	Enteroctopodidae	Enteroctopus	dofleini		species		(Wülker, 1910)
	imerss.org:PMLS:2748					Donna Gibbs								PRESENT				Calliostoma ligatum					iNaturalist:129920								Calliostoma ligatum							Animalia	Mollusca	Gastropoda	Trochida	Calliostomatidae	Calliostoma	ligatum		species		(Gould, 1849)
	imerss.org:PMLS:2749					Donna Gibbs								PRESENT				Crassadoma gigantea					iNaturalist:54526								Crassadoma gigantea							Animalia	Mollusca	Bivalvia	Pectinida	Pectinidae	Crassadoma	gigantea		species		(J.E. Gray, 1825)
	imerss.org:PMLS:2750					Donna Gibbs								PRESENT				Entodesma navicula					iNaturalist:339164								Entodesma navicula							Animalia	Mollusca	Bivalvia		Lyonsiidae	Entodesma	navicula		species		(Adams & Reeve, 1850)
	imerss.org:PMLS:2761					Donna Gibbs								PRESENT				Tonicella insignis					iNaturalist:498132								Tonicella insignis							Animalia	Mollusca	Polyplacophora	Chitonida	Tonicellidae	Tonicella	insignis		species		(Reeve, 1847)
	imerss.org:PMLS:2762					Donna Gibbs								PRESENT				Entodesma navicula					iNaturalist:339164								Entodesma navicula							Animalia	Mollusca	Bivalvia		Lyonsiidae	Entodesma	navicula		species		(Adams & Reeve, 1850)
	imerss.org:PMLS:2763					Donna Gibbs								PRESENT				Acmaea mitra					iNaturalist:47676								Acmaea mitra							Animalia	Mollusca	Gastropoda		Acmaeidae	Acmaea	mitra		species		Rathke, 1833
	imerss.org:PMLS:2764					Donna Gibbs								PRESENT				Diodora aspera					iNaturalist:64148								Diodora aspera							Animalia	Mollusca	Gastropoda	Lepetellida	Fissurellidae	Diodora	aspera		species		(Rathke, 1833)
	imerss.org:PMLS:2765					Donna Gibbs								PRESENT				Ceratostoma foliatum					iNaturalist:116687								Ceratostoma foliatum							Animalia	Mollusca	Gastropoda	Neogastropoda	Muricidae	Ceratostoma	foliatum		species		(Gmelin, 1791)
	imerss.org:PMLS:2766					Donna Gibbs								PRESENT				Paciocinebrina lurida					iNaturalist:910800								Paciocinebrina lurida							Animalia	Mollusca	Gastropoda	Neogastropoda	Muricidae	Paciocinebrina	lurida		species		(Middendorff, 1848)
	imerss.org:PMLS:2767					Donna Gibbs								PRESENT				Aldisa cooperi					iNaturalist:50097								Aldisa cooperi							Animalia	Mollusca	Gastropoda	Nudibranchia	Cadlinidae	Aldisa	cooperi		species		Robilliard & Baba, 1972
	imerss.org:PMLS:2768					Donna Gibbs								PRESENT				Enteroctopus dofleini					iNaturalist:48863								Enteroctopus dofleini							Animalia	Mollusca	Cephalopoda	Octopoda	Enteroctopodidae	Enteroctopus	dofleini		species		(Wülker, 1910)
	imerss.org:PMLS:2797			Count: many		Andy Lamb								PRESENT				Tonicella lineata					iNaturalist:47425								Tonicella lineata							Animalia	Mollusca	Polyplacophora	Chitonida	Tonicellidae	Tonicella	lineata		species		(Wood, 1815)
	imerss.org:PMLS:2798			Count: few		Andy Lamb								PRESENT				Tonicella insignis					iNaturalist:498132								Tonicella insignis							Animalia	Mollusca	Polyplacophora	Chitonida	Tonicellidae	Tonicella	insignis		species		(Reeve, 1847)
	imerss.org:PMLS:2799					Andy Lamb		3						PRESENT				Mopalia spectabilis					iNaturalist:364026								Mopalia spectabilis							Animalia	Mollusca	Polyplacophora	Chitonida	Mopaliidae	Mopalia	spectabilis		species		I. M. Cowan & G. M. Cowan, 1977
	imerss.org:PMLS:2800			Count: few		Andy Lamb								PRESENT				Lepidozona mertensii					iNaturalist:117621								Lepidozona mertensii							Animalia	Mollusca	Polyplacophora	Chitonida	Ischnochitonidae	Lepidozona	mertensii		species		(Middendorff, 1847)
	imerss.org:PMLS:2801					Andy Lamb		2						PRESENT				Cryptochiton stelleri					iNaturalist:49053								Cryptochiton stelleri							Animalia	Mollusca	Polyplacophora	Chitonida	Acanthochitonidae	Cryptochiton	stelleri		species		(Middendorff, 1847)
	imerss.org:PMLS:2802			Count: some		Andy Lamb								PRESENT				Chlamys sp.					iNaturalist:84497								Chlamys							Animalia	Mollusca	Bivalvia	Pectinida	Pectinidae	Chlamys			genus
	imerss.org:PMLS:2803			Count: few		Andy Lamb								PRESENT				Crassadoma gigantea					iNaturalist:54526								Crassadoma gigantea							Animalia	Mollusca	Bivalvia	Pectinida	Pectinidae	Crassadoma	gigantea		species		(J.E. Gray, 1825)
	imerss.org:PMLS:2804					Andy Lamb		1						PRESENT				Entodesma navicula					iNaturalist:339164								Entodesma navicula							Animalia	Mollusca	Bivalvia		Lyonsiidae	Entodesma	navicula		species		(Adams & Reeve, 1850)
	imerss.org:PMLS:2805			Count: some		Andy Lamb								PRESENT				Nucella lamellosa					iNaturalist:117641								Nucella lamellosa							Animalia	Mollusca	Gastropoda	Neogastropoda	Muricidae	Nucella	lamellosa		species		(Gmelin, 1791)
	imerss.org:PMLS:2806			Count: some		Andy Lamb								PRESENT				Ceratostoma foliatum					iNaturalist:116687								Ceratostoma foliatum							Animalia	Mollusca	Gastropoda	Neogastropoda	Muricidae	Ceratostoma	foliatum		species		(Gmelin, 1791)
	imerss.org:PMLS:2807					Andy Lamb		2						PRESENT				Fusitriton oregonensis					iNaturalist:448389								Fusitriton oregonensis							Animalia	Mollusca	Gastropoda	Littorinimorpha	Cymatiidae	Fusitriton	oregonensis		species		(Redfield, 1846)
	imerss.org:PMLS:2808					Andy Lamb		2						PRESENT				Peltodoris nobilis					iNaturalist:48450								Peltodoris nobilis							Animalia	Mollusca	Gastropoda	Nudibranchia	Discodorididae	Peltodoris	nobilis		species		(MacFarland, 1905)
	imerss.org:PMLS:2809					Andy Lamb		1						PRESENT				Triopha modesta					iNaturalist:1133369								Triopha modesta							Animalia	Mollusca	Gastropoda	Nudibranchia	Polyceridae	Triopha	modesta		species		Bergh, 1880
	imerss.org:PMLS:2810					Andy Lamb		1						PRESENT				Dirona albolineata					iNaturalist:47477								Dirona albolineata							Animalia	Mollusca	Gastropoda	Nudibranchia	Dironidae	Dirona	albolineata		species		MacFarland, 1905
	imerss.org:PMLS:2896					Charlie Gibbs								PRESENT				Tonicella lineata					iNaturalist:47425								Tonicella lineata							Animalia	Mollusca	Polyplacophora	Chitonida	Tonicellidae	Tonicella	lineata		species		(Wood, 1815)
	imerss.org:PMLS:2897			Count: some		Charlie Gibbs								PRESENT				Tonicella insignis					iNaturalist:498132								Tonicella insignis							Animalia	Mollusca	Polyplacophora	Chitonida	Tonicellidae	Tonicella	insignis		species		(Reeve, 1847)
	imerss.org:PMLS:2898					Charlie Gibbs								PRESENT				Mopalia lignosa					iNaturalist:51724								Mopalia lignosa							Animalia	Mollusca	Polyplacophora	Chitonida	Mopaliidae	Mopalia	lignosa		species		(Gould, 1846)
	imerss.org:PMLS:2899			Count: few		Charlie Gibbs								PRESENT				Mopalia kennerelyi					iNaturalist:117634								Mopalia ciliata							Animalia	Mollusca	Polyplacophora	Chitonida	Mopaliidae	Mopalia	ciliata		species		(G. B. Sowerby II, 1840)
	imerss.org:PMLS:2900					Charlie Gibbs								PRESENT				Mopalia hindsii					iNaturalist:51725								Mopalia hindsii							Animalia	Mollusca	Polyplacophora	Chitonida	Mopaliidae	Mopalia	hindsii		species		(Reeve, 1847)
	imerss.org:PMLS:2901					Charlie Gibbs								PRESENT				Mopalia spectabilis					iNaturalist:364026								Mopalia spectabilis							Animalia	Mollusca	Polyplacophora	Chitonida	Mopaliidae	Mopalia	spectabilis		species		I. M. Cowan & G. M. Cowan, 1977
	imerss.org:PMLS:2902					Charlie Gibbs								PRESENT				Lepidozona mertensii					iNaturalist:117621								Lepidozona mertensii							Animalia	Mollusca	Polyplacophora	Chitonida	Ischnochitonidae	Lepidozona	mertensii		species		(Middendorff, 1847)
	imerss.org:PMLS:2903			Count: few		Charlie Gibbs								PRESENT				Lepidozona trifida					iNaturalist:1174737								Tripoplax trifida							Animalia	Mollusca	Polyplacophora	Chitonida	Ischnochitonidae	Tripoplax	trifida		species		(Carpenter, 1864)
	imerss.org:PMLS:2904					Charlie Gibbs		1						PRESENT				Cryptochiton stelleri					iNaturalist:49053								Cryptochiton stelleri							Animalia	Mollusca	Polyplacophora	Chitonida	Acanthochitonidae	Cryptochiton	stelleri		species		(Middendorff, 1847)
	imerss.org:PMLS:2905			Count: some		Charlie Gibbs								PRESENT				Mytilus edulis complex					iNaturalist:1108240								Mytilus edulis							Animalia	Mollusca	Bivalvia	Mytilida	Mytilidae	Mytilus	edulis		species
	imerss.org:PMLS:2906			Count: few		Charlie Gibbs								PRESENT				Chlamys sp.					iNaturalist:84497								Chlamys							Animalia	Mollusca	Bivalvia	Pectinida	Pectinidae	Chlamys			genus
	imerss.org:PMLS:2907			Count: many		Charlie Gibbs								PRESENT				Crassadoma gigantea					iNaturalist:54526								Crassadoma gigantea							Animalia	Mollusca	Bivalvia	Pectinida	Pectinidae	Crassadoma	gigantea		species		(J.E. Gray, 1825)
	imerss.org:PMLS:2908					Charlie Gibbs								PRESENT				Pododesmus macrochisma					iNaturalist:68652								Pododesmus macrochisma							Animalia	Mollusca	Bivalvia	Pectinida	Anomiidae	Pododesmus	macrochisma		species		(Deshayes, 1839)
	imerss.org:PMLS:2909			Count: few		Charlie Gibbs								PRESENT				Mytilimeria nuttalli					iNaturalist:873896								Mytilimeria nuttalli							Animalia	Mollusca	Bivalvia		Lyonsiidae	Mytilimeria	nuttalli		species		Conrad, 1837
	imerss.org:PMLS:2910			Count: few		Charlie Gibbs								PRESENT				Entodesma navicula					iNaturalist:339164								Entodesma navicula							Animalia	Mollusca	Bivalvia		Lyonsiidae	Entodesma	navicula		species		(Adams & Reeve, 1850)
	imerss.org:PMLS:2911			Count: some		Charlie Gibbs								PRESENT				Acmaea mitra					iNaturalist:47676								Acmaea mitra							Animalia	Mollusca	Gastropoda		Acmaeidae	Acmaea	mitra		species		Rathke, 1833
	imerss.org:PMLS:2912					Charlie Gibbs								PRESENT				Diodora aspera					iNaturalist:64148								Diodora aspera							Animalia	Mollusca	Gastropoda	Lepetellida	Fissurellidae	Diodora	aspera		species		(Rathke, 1833)
	imerss.org:PMLS:2913					Charlie Gibbs		1						PRESENT				Puncturella cucullata					iNaturalist:904312								Puncturella cucullata							Animalia	Mollusca	Gastropoda	Lepetellida	Fissurellidae	Puncturella	cucullata		species		(Gould, 1846)
	imerss.org:PMLS:2914			Count: abundant		Charlie Gibbs								PRESENT				Crepidula norrisiarum					iNaturalist:485954								Crepidula norrisiarum							Animalia	Mollusca	Gastropoda	Littorinimorpha	Calyptraeidae	Crepidula	norrisiarum		species		Williamson, 1905
	imerss.org:PMLS:2915			Count: some		Charlie Gibbs								PRESENT				Crepidula cf nummaria					iNaturalist:117325								Crepidula nummaria							Animalia	Mollusca	Gastropoda	Littorinimorpha	Calyptraeidae	Crepidula	nummaria		species
	imerss.org:PMLS:2916			Count: some		Charlie Gibbs								PRESENT				Ceratostoma foliatum					iNaturalist:116687								Ceratostoma foliatum							Animalia	Mollusca	Gastropoda	Neogastropoda	Muricidae	Ceratostoma	foliatum		species		(Gmelin, 1791)
	imerss.org:PMLS:2917			Count: few		Charlie Gibbs								PRESENT				Lirabuccinum dirum					iNaturalist:117642								Lirabuccinum dirum							Animalia	Mollusca	Gastropoda	Neogastropoda	Tudiclidae	Lirabuccinum	dirum		species		(Reeve, 1846)
	imerss.org:PMLS:2918					Charlie Gibbs								PRESENT				Amphissa columbiana					iNaturalist:117643								Amphissa columbiana							Animalia	Mollusca	Gastropoda	Neogastropoda	Columbellidae	Amphissa	columbiana		species		Dall, 1916
	imerss.org:PMLS:2919			Count: abundant		Charlie Gibbs								PRESENT				Paciocinebrina lurida					iNaturalist:910800								Paciocinebrina lurida							Animalia	Mollusca	Gastropoda	Neogastropoda	Muricidae	Paciocinebrina	lurida		species		(Middendorff, 1848)
	imerss.org:PMLS:2920			Count: many		Charlie Gibbs								PRESENT				Calliostoma ligatum					iNaturalist:129920								Calliostoma ligatum							Animalia	Mollusca	Gastropoda	Trochida	Calliostomatidae	Calliostoma	ligatum		species		(Gould, 1849)
	imerss.org:PMLS:2921					Charlie Gibbs								PRESENT				Trichotropis cancellata					iNaturalist:447177								Trichotropis cancellata							Animalia	Mollusca	Gastropoda	Littorinimorpha	Capulidae	Trichotropis	cancellata		species		Hinds, 1843
	imerss.org:PMLS:2922			Count: few		Charlie Gibbs								PRESENT				Peltodoris nobilis					iNaturalist:48450								Peltodoris nobilis							Animalia	Mollusca	Gastropoda	Nudibranchia	Discodorididae	Peltodoris	nobilis		species		(MacFarland, 1905)
	imerss.org:PMLS:2923			Count: few		Charlie Gibbs								PRESENT				Doris montereyensis					iNaturalist:47469								Doris montereyensis							Animalia	Mollusca	Gastropoda	Nudibranchia	Dorididae	Doris	montereyensis		species		J. G. Cooper, 1863
	imerss.org:PMLS:2924					Charlie Gibbs		3						PRESENT				Diaulula odonoghuei					iNaturalist:508237								Diaulula odonoghuei							Animalia	Mollusca	Gastropoda	Nudibranchia	Discodorididae	Diaulula	odonoghuei		species		(Steinberg, 1963)
	imerss.org:PMLS:2925			Count: many		Charlie Gibbs								PRESENT				Cadlina luteomarginata complex					iNaturalist:50146								Cadlina luteomarginata							Animalia	Mollusca	Gastropoda	Nudibranchia	Cadlinidae	Cadlina	luteomarginata		species		MacFarland, 1966
	imerss.org:PMLS:2926					Charlie Gibbs		2						PRESENT				Dendronotus albus					iNaturalist:47773								Dendronotus albus							Animalia	Mollusca	Gastropoda	Nudibranchia	Dendronotidae	Dendronotus	albus		species		MacFarland, 1966
	imerss.org:PMLS:2927					Charlie Gibbs								PRESENT				Hermissenda crassicornis					iNaturalist:495552								Hermissenda crassicornis							Animalia	Mollusca	Gastropoda	Nudibranchia	Myrrhinidae	Hermissenda	crassicornis		species		(Eschscholtz, 1831)
	imerss.org:PMLS:2928					Charlie Gibbs		1						PRESENT				Coryphella verrucosa					iNaturalist:633193								Coryphella verrucosa							Animalia	Mollusca	Gastropoda	Nudibranchia	Coryphellidae	Coryphella	verrucosa		species		(M. Sars, 1829)
	imerss.org:PMLS:2929					Charlie Gibbs								PRESENT				Orienthella trilineata					iNaturalist:764704								Orienthella trilineata							Animalia	Mollusca	Gastropoda	Nudibranchia	Coryphellidae	Orienthella	trilineata		species		(O'Donoghue, 1921)
	imerss.org:PMLS:3027					Andy Lamb								PRESENT				Tonicella lineata					iNaturalist:47425								Tonicella lineata							Animalia	Mollusca	Polyplacophora	Chitonida	Tonicellidae	Tonicella	lineata		species		(Wood, 1815)
	imerss.org:PMLS:3028			Count: many		Andy Lamb								PRESENT				Tonicella insignis					iNaturalist:498132								Tonicella insignis							Animalia	Mollusca	Polyplacophora	Chitonida	Tonicellidae	Tonicella	insignis		species		(Reeve, 1847)
	imerss.org:PMLS:3029					Andy Lamb		1						PRESENT				Mopalia vespertina					iNaturalist:364027								Mopalia vespertina							Animalia	Mollusca	Polyplacophora	Chitonida	Mopaliidae	Mopalia	vespertina		species		(Gould, 1852)
	imerss.org:PMLS:3030			Count: few		Andy Lamb								PRESENT				Lepidozona mertensii					iNaturalist:117621								Lepidozona mertensii							Animalia	Mollusca	Polyplacophora	Chitonida	Ischnochitonidae	Lepidozona	mertensii		species		(Middendorff, 1847)
	imerss.org:PMLS:3031			Count: many		Andy Lamb								PRESENT				Cryptochiton stelleri					iNaturalist:49053								Cryptochiton stelleri							Animalia	Mollusca	Polyplacophora	Chitonida	Acanthochitonidae	Cryptochiton	stelleri		species		(Middendorff, 1847)
	imerss.org:PMLS:3032			Count: few		Andy Lamb								PRESENT				Chlamys sp.					iNaturalist:84497								Chlamys							Animalia	Mollusca	Bivalvia	Pectinida	Pectinidae	Chlamys			genus
	imerss.org:PMLS:3033			Count: few		Andy Lamb								PRESENT				Crassadoma gigantea					iNaturalist:54526								Crassadoma gigantea							Animalia	Mollusca	Bivalvia	Pectinida	Pectinidae	Crassadoma	gigantea		species		(J.E. Gray, 1825)
	imerss.org:PMLS:3034			Count: some		Andy Lamb								PRESENT				Pododesmus macrochisma					iNaturalist:68652								Pododesmus macrochisma							Animalia	Mollusca	Bivalvia	Pectinida	Anomiidae	Pododesmus	macrochisma		species		(Deshayes, 1839)
	imerss.org:PMLS:3035			Count: very abundant		Andy Lamb								PRESENT				Panopea generosa					iNaturalist:117618								Panopea generosa							Animalia	Mollusca	Bivalvia	Adapedonta	Hiatellidae	Panopea	generosa		species		Gould, 1850
	imerss.org:PMLS:3036			Count: many		Andy Lamb								PRESENT				Bankia setacea					iNaturalist:347368								Bankia setacea							Animalia	Mollusca	Bivalvia	Myida	Teredinidae	Bankia	setacea		species		(Tryon, 1863)
	imerss.org:PMLS:3037					Andy Lamb								PRESENT				Ceratostoma foliatum					iNaturalist:116687								Ceratostoma foliatum							Animalia	Mollusca	Gastropoda	Neogastropoda	Muricidae	Ceratostoma	foliatum		species		(Gmelin, 1791)
	imerss.org:PMLS:3038					Andy Lamb		1						PRESENT				Gastropteron pacificum					iNaturalist:49839								Gastropteron pacificum							Animalia	Mollusca	Gastropoda	Cephalaspidea	Gastropteridae	Gastropteron	pacificum		species		Bergh, 1894
	imerss.org:PMLS:3039					Andy Lamb		1						PRESENT				Geitodoris heathi					iNaturalist:47505								Geitodoris heathi							Animalia	Mollusca	Gastropoda	Nudibranchia	Discodorididae	Geitodoris	heathi		species		(MacFarland, 1905)
	imerss.org:PMLS:3040					Andy Lamb		2						PRESENT				Diaulula odonoghuei					iNaturalist:508237								Diaulula odonoghuei							Animalia	Mollusca	Gastropoda	Nudibranchia	Discodorididae	Diaulula	odonoghuei		species		(Steinberg, 1963)
	imerss.org:PMLS:3041					Andy Lamb		2						PRESENT				Cadlina luteomarginata complex					iNaturalist:50146								Cadlina luteomarginata							Animalia	Mollusca	Gastropoda	Nudibranchia	Cadlinidae	Cadlina	luteomarginata		species		MacFarland, 1966
	imerss.org:PMLS:3042					Andy Lamb		2						PRESENT				Acanthodoris nanaimoensis					iNaturalist:47476								Acanthodoris nanaimoensis							Animalia	Mollusca	Gastropoda	Nudibranchia	Onchidorididae	Acanthodoris	nanaimoensis		species		O'Donoghue, 1921
	imerss.org:PMLS:3043			Count: few		Andy Lamb								PRESENT				Dendronotus iris					iNaturalist:47706								Dendronotus iris							Animalia	Mollusca	Gastropoda	Nudibranchia	Dendronotidae	Dendronotus	iris		species		J. G. Cooper, 1863
	imerss.org:PMLS:3044					Andy Lamb								PRESENT				Armina californica					iNaturalist:47499								Armina californica							Animalia	Mollusca	Gastropoda	Nudibranchia	Arminidae	Armina	californica		species		(J. G. Cooper, 1863)
	imerss.org:PMLS:3045					Andy Lamb								PRESENT				Dirona albolineata					iNaturalist:47477								Dirona albolineata							Animalia	Mollusca	Gastropoda	Nudibranchia	Dironidae	Dirona	albolineata		species		MacFarland, 1905
	imerss.org:PMLS:3046					Andy Lamb		1						PRESENT				Enteroctopus dofleini					iNaturalist:48863								Enteroctopus dofleini							Animalia	Mollusca	Cephalopoda	Octopoda	Enteroctopodidae	Enteroctopus	dofleini		species		(Wülker, 1910)
	imerss.org:PMLS:3124			Count: few		Andy Lamb								PRESENT				Tonicella lineata					iNaturalist:47425								Tonicella lineata							Animalia	Mollusca	Polyplacophora	Chitonida	Tonicellidae	Tonicella	lineata		species		(Wood, 1815)
	imerss.org:PMLS:3125			Count: few		Andy Lamb								PRESENT				Mopalia sp.					iNaturalist:47630								Mopalia							Animalia	Mollusca	Polyplacophora	Chitonida	Mopaliidae	Mopalia			genus
	imerss.org:PMLS:3126			Count: few		Andy Lamb								PRESENT				Diodora aspera					iNaturalist:64148								Diodora aspera							Animalia	Mollusca	Gastropoda	Lepetellida	Fissurellidae	Diodora	aspera		species		(Rathke, 1833)
	imerss.org:PMLS:3127			Count: some		Andy Lamb								PRESENT				Calliostoma ligatum					iNaturalist:129920								Calliostoma ligatum							Animalia	Mollusca	Gastropoda	Trochida	Calliostomatidae	Calliostoma	ligatum		species		(Gould, 1849)
	imerss.org:PMLS:3128			Count: many		Andy Lamb								PRESENT				Ceratostoma foliatum					iNaturalist:116687								Ceratostoma foliatum							Animalia	Mollusca	Gastropoda	Neogastropoda	Muricidae	Ceratostoma	foliatum		species		(Gmelin, 1791)
	imerss.org:PMLS:3129			Count: few		Andy Lamb								PRESENT				Cadlina luteomarginata complex					iNaturalist:50146								Cadlina luteomarginata							Animalia	Mollusca	Gastropoda	Nudibranchia	Cadlinidae	Cadlina	luteomarginata		species		MacFarland, 1966
	imerss.org:PMLS:3130			Count: few		Andy Lamb								PRESENT				Dirona albolineata					iNaturalist:47477								Dirona albolineata							Animalia	Mollusca	Gastropoda	Nudibranchia	Dironidae	Dirona	albolineata		species		MacFarland, 1905
	imerss.org:PMLS:3131					Andy Lamb		1						PRESENT				Chlamys hastata					iNaturalist:180013								Chlamys hastata							Animalia	Mollusca	Bivalvia	Pectinida	Pectinidae	Chlamys	hastata		species		(G. B. Sowerby II, 1842)
	imerss.org:PMLS:3132			Count: few		Andy Lamb								PRESENT				Crassadoma gigantea					iNaturalist:54526								Crassadoma gigantea							Animalia	Mollusca	Bivalvia	Pectinida	Pectinidae	Crassadoma	gigantea		species		(J.E. Gray, 1825)
	imerss.org:PMLS:3212			Count: some		Andy Lamb								PRESENT				Tonicella lineata					iNaturalist:47425								Tonicella lineata							Animalia	Mollusca	Polyplacophora	Chitonida	Tonicellidae	Tonicella	lineata		species		(Wood, 1815)
	imerss.org:PMLS:3213			Count: few		Andy Lamb								PRESENT				Mopalia lignosa					iNaturalist:51724								Mopalia lignosa							Animalia	Mollusca	Polyplacophora	Chitonida	Mopaliidae	Mopalia	lignosa		species		(Gould, 1846)
	imerss.org:PMLS:3214			Count: few		Andy Lamb								PRESENT				Mopalia kennerelyi					iNaturalist:117634								Mopalia ciliata							Animalia	Mollusca	Polyplacophora	Chitonida	Mopaliidae	Mopalia	ciliata		species		(G. B. Sowerby II, 1840)
	imerss.org:PMLS:3215			Count: very many		Andy Lamb								PRESENT				Mopalia hindsii					iNaturalist:51725								Mopalia hindsii							Animalia	Mollusca	Polyplacophora	Chitonida	Mopaliidae	Mopalia	hindsii		species		(Reeve, 1847)
	imerss.org:PMLS:3216			Count: some		Andy Lamb								PRESENT				Mopalia spectabilis					iNaturalist:364026								Mopalia spectabilis							Animalia	Mollusca	Polyplacophora	Chitonida	Mopaliidae	Mopalia	spectabilis		species		I. M. Cowan & G. M. Cowan, 1977
	imerss.org:PMLS:3217			Count: some		Andy Lamb								PRESENT				Mopalia vespertina					iNaturalist:364027								Mopalia vespertina							Animalia	Mollusca	Polyplacophora	Chitonida	Mopaliidae	Mopalia	vespertina		species		(Gould, 1852)
	imerss.org:PMLS:3218			Count: few		Andy Lamb								PRESENT				Lepidozona mertensii					iNaturalist:117621								Lepidozona mertensii							Animalia	Mollusca	Polyplacophora	Chitonida	Ischnochitonidae	Lepidozona	mertensii		species		(Middendorff, 1847)
	imerss.org:PMLS:3219					Andy Lamb		1						PRESENT				Katharina tunicata					iNaturalist:47632								Katharina tunicata							Animalia	Mollusca	Polyplacophora	Chitonida	Mopaliidae	Katharina	tunicata		species		(Wood, 1815)
	imerss.org:PMLS:3220			Count: few		Andy Lamb								PRESENT				Cryptochiton stelleri					iNaturalist:49053								Cryptochiton stelleri							Animalia	Mollusca	Polyplacophora	Chitonida	Acanthochitonidae	Cryptochiton	stelleri		species		(Middendorff, 1847)
	imerss.org:PMLS:3221			Count: few		Andy Lamb								PRESENT				Mytilus edulis complex					iNaturalist:1108240								Mytilus edulis							Animalia	Mollusca	Bivalvia	Mytilida	Mytilidae	Mytilus	edulis		species
	imerss.org:PMLS:3222			Count: few		Andy Lamb								PRESENT				Modiolus modiolus					iNaturalist:123772								Modiolus modiolus							Animalia	Mollusca	Bivalvia	Mytilida	Mytilidae	Modiolus	modiolus		species		(Linnaeus, 1758)
	imerss.org:PMLS:3223			Count: few		Andy Lamb								PRESENT				Chlamys hastata					iNaturalist:180013								Chlamys hastata							Animalia	Mollusca	Bivalvia	Pectinida	Pectinidae	Chlamys	hastata		species		(G. B. Sowerby II, 1842)
	imerss.org:PMLS:3224			Count: very many		Andy Lamb								PRESENT				Crassadoma gigantea					iNaturalist:54526								Crassadoma gigantea							Animalia	Mollusca	Bivalvia	Pectinida	Pectinidae	Crassadoma	gigantea		species		(J.E. Gray, 1825)
	imerss.org:PMLS:3225			Count: abundant		Andy Lamb								PRESENT				Pododesmus macrochisma					iNaturalist:68652								Pododesmus macrochisma							Animalia	Mollusca	Bivalvia	Pectinida	Anomiidae	Pododesmus	macrochisma		species		(Deshayes, 1839)
	imerss.org:PMLS:3226			Count: few		Andy Lamb								PRESENT				Gari californica					iNaturalist:354323								Gari californica							Animalia	Mollusca	Bivalvia	Cardiida	Psammobiidae	Gari	californica		species		(Conrad, 1849)
	imerss.org:PMLS:3227			Count: few		Andy Lamb								PRESENT				Humilaria kennerleyi					iNaturalist:873901								Humilaria kennerleyi							Animalia	Mollusca	Bivalvia	Venerida	Veneridae	Humilaria	kennerleyi		species		(Reeve, 1863)
	imerss.org:PMLS:3228			Count: few		Andy Lamb								PRESENT				Entodesma navicula					iNaturalist:339164								Entodesma navicula							Animalia	Mollusca	Bivalvia		Lyonsiidae	Entodesma	navicula		species		(Adams & Reeve, 1850)
	imerss.org:PMLS:3229			Count: some		Andy Lamb								PRESENT				Acmaea mitra					iNaturalist:47676								Acmaea mitra							Animalia	Mollusca	Gastropoda		Acmaeidae	Acmaea	mitra		species		Rathke, 1833
	imerss.org:PMLS:3230			Count: some		Andy Lamb								PRESENT				Diodora aspera					iNaturalist:64148								Diodora aspera							Animalia	Mollusca	Gastropoda	Lepetellida	Fissurellidae	Diodora	aspera		species		(Rathke, 1833)
	imerss.org:PMLS:3231			Count: some		Andy Lamb								PRESENT				Nucella canaliculata					iNaturalist:69998								Nucella canaliculata							Animalia	Mollusca	Gastropoda	Neogastropoda	Muricidae	Nucella	canaliculata		species		(Duclos, 1832)
	imerss.org:PMLS:3232			Count: abundant		Andy Lamb								PRESENT				Ceratostoma foliatum					iNaturalist:116687								Ceratostoma foliatum							Animalia	Mollusca	Gastropoda	Neogastropoda	Muricidae	Ceratostoma	foliatum		species		(Gmelin, 1791)
	imerss.org:PMLS:3233			Count: some		Andy Lamb								PRESENT				Amphissa columbiana					iNaturalist:117643								Amphissa columbiana							Animalia	Mollusca	Gastropoda	Neogastropoda	Columbellidae	Amphissa	columbiana		species		Dall, 1916
	imerss.org:PMLS:3234			Count: abundant		Andy Lamb								PRESENT				Paciocinebrina lurida					iNaturalist:910800								Paciocinebrina lurida							Animalia	Mollusca	Gastropoda	Neogastropoda	Muricidae	Paciocinebrina	lurida		species		(Middendorff, 1848)
	imerss.org:PMLS:3235			Count: very many		Andy Lamb								PRESENT				Calliostoma ligatum					iNaturalist:129920								Calliostoma ligatum							Animalia	Mollusca	Gastropoda	Trochida	Calliostomatidae	Calliostoma	ligatum		species		(Gould, 1849)
	imerss.org:PMLS:3236					Andy Lamb		1						PRESENT				Calliostoma annulatum					iNaturalist:121181								Calliostoma annulatum							Animalia	Mollusca	Gastropoda	Trochida	Calliostomatidae	Calliostoma	annulatum		species		(Lightfoot, 1786)
	imerss.org:PMLS:3237			Count: few		Andy Lamb								PRESENT				Trichotropis cancellata					iNaturalist:447177								Trichotropis cancellata							Animalia	Mollusca	Gastropoda	Littorinimorpha	Capulidae	Trichotropis	cancellata		species		Hinds, 1843
	imerss.org:PMLS:3238					Andy Lamb		1						PRESENT				Berthella chacei					iNaturalist:1081461								Berthella chacei							Animalia	Mollusca	Gastropoda	Pleurobranchida	Pleurobranchidae	Berthella	chacei		species		(J. Q. Burch, 1944)
	imerss.org:PMLS:3239					Andy Lamb		1						PRESENT				Peltodoris nobilis					iNaturalist:48450								Peltodoris nobilis							Animalia	Mollusca	Gastropoda	Nudibranchia	Discodorididae	Peltodoris	nobilis		species		(MacFarland, 1905)
	imerss.org:PMLS:3240					Andy Lamb		1						PRESENT				Doris montereyensis					iNaturalist:47469								Doris montereyensis							Animalia	Mollusca	Gastropoda	Nudibranchia	Dorididae	Doris	montereyensis		species		J. G. Cooper, 1863
	imerss.org:PMLS:3241					Andy Lamb		1						PRESENT				Acanthodoris hudsoni					iNaturalist:48447								Acanthodoris hudsoni							Animalia	Mollusca	Gastropoda	Nudibranchia	Onchidorididae	Acanthodoris	hudsoni		species		MacFarland, 1905
	imerss.org:PMLS:3242			Count: some		Andy Lamb								PRESENT				Acanthodoris nanaimoensis					iNaturalist:47476								Acanthodoris nanaimoensis							Animalia	Mollusca	Gastropoda	Nudibranchia	Onchidorididae	Acanthodoris	nanaimoensis		species		O'Donoghue, 1921
	imerss.org:PMLS:3243					Andy Lamb		1						PRESENT				Aldisa cooperi					iNaturalist:50097								Aldisa cooperi							Animalia	Mollusca	Gastropoda	Nudibranchia	Cadlinidae	Aldisa	cooperi		species		Robilliard & Baba, 1972
	imerss.org:PMLS:3244					Andy Lamb		2						PRESENT				Hermissenda crassicornis					iNaturalist:495552								Hermissenda crassicornis							Animalia	Mollusca	Gastropoda	Nudibranchia	Myrrhinidae	Hermissenda	crassicornis		species		(Eschscholtz, 1831)
	imerss.org:PMLS:3245					Andy Lamb		2						PRESENT				Himatina trophina					iNaturalist:633561								Himatina trophina							Animalia	Mollusca	Gastropoda	Nudibranchia	Coryphellidae	Himatina	trophina		species		(Bergh, 1890)
	imerss.org:PMLS:3321			Count: few		Andy Lamb								PRESENT				Tonicella lineata					iNaturalist:47425								Tonicella lineata							Animalia	Mollusca	Polyplacophora	Chitonida	Tonicellidae	Tonicella	lineata		species		(Wood, 1815)
	imerss.org:PMLS:3322			Count: some		Andy Lamb								PRESENT				Tonicella insignis					iNaturalist:498132								Tonicella insignis							Animalia	Mollusca	Polyplacophora	Chitonida	Tonicellidae	Tonicella	insignis		species		(Reeve, 1847)
	imerss.org:PMLS:3323			Count: some		Andy Lamb								PRESENT				Lepidozona mertensii					iNaturalist:117621								Lepidozona mertensii							Animalia	Mollusca	Polyplacophora	Chitonida	Ischnochitonidae	Lepidozona	mertensii		species		(Middendorff, 1847)
	imerss.org:PMLS:3324			Count: some		Andy Lamb								PRESENT				Lepidozona trifida					iNaturalist:1174737								Tripoplax trifida							Animalia	Mollusca	Polyplacophora	Chitonida	Ischnochitonidae	Tripoplax	trifida		species		(Carpenter, 1864)
	imerss.org:PMLS:3325			Count: many		Andy Lamb								PRESENT				Pododesmus macrochisma					iNaturalist:68652								Pododesmus macrochisma							Animalia	Mollusca	Bivalvia	Pectinida	Anomiidae	Pododesmus	macrochisma		species		(Deshayes, 1839)
	imerss.org:PMLS:3326					Andy Lamb		1						PRESENT				Puncturella cucullata					iNaturalist:904312								Puncturella cucullata							Animalia	Mollusca	Gastropoda	Lepetellida	Fissurellidae	Puncturella	cucullata		species		(Gould, 1846)
	imerss.org:PMLS:3327			Count: few		Andy Lamb								PRESENT				Nucella lamellosa					iNaturalist:117641								Nucella lamellosa							Animalia	Mollusca	Gastropoda	Neogastropoda	Muricidae	Nucella	lamellosa		species		(Gmelin, 1791)
	imerss.org:PMLS:3328					Andy Lamb		2						PRESENT				Peltodoris nobilis					iNaturalist:48450								Peltodoris nobilis							Animalia	Mollusca	Gastropoda	Nudibranchia	Discodorididae	Peltodoris	nobilis		species		(MacFarland, 1905)
	imerss.org:PMLS:3329					Andy Lamb		1						PRESENT				Diaulula lentiginosa					iNaturalist:568137								Peltodoris lentiginosa							Animalia	Mollusca	Gastropoda	Nudibranchia	Discodorididae	Peltodoris	lentiginosa		species		(Millen, 1982)
	imerss.org:PMLS:3330			Count: few		Andy Lamb								PRESENT				Cadlina luteomarginata complex					iNaturalist:50146								Cadlina luteomarginata							Animalia	Mollusca	Gastropoda	Nudibranchia	Cadlinidae	Cadlina	luteomarginata		species		MacFarland, 1966
	imerss.org:PMLS:3331					Andy Lamb		1						PRESENT				Dendronotus iris					iNaturalist:47706								Dendronotus iris							Animalia	Mollusca	Gastropoda	Nudibranchia	Dendronotidae	Dendronotus	iris		species		J. G. Cooper, 1863
	imerss.org:PMLS:3332					Andy Lamb		2						PRESENT				Dirona albolineata					iNaturalist:47477								Dirona albolineata							Animalia	Mollusca	Gastropoda	Nudibranchia	Dironidae	Dirona	albolineata		species		MacFarland, 1905
	imerss.org:PMLS:3333			Count: abundant		Andy Lamb								PRESENT				Himatina trophina					iNaturalist:633561								Himatina trophina							Animalia	Mollusca	Gastropoda	Nudibranchia	Coryphellidae	Himatina	trophina		species		(Bergh, 1890)
	imerss.org:PMLS:3420			Count: some		Andy Lamb								PRESENT				Tonicella lineata					iNaturalist:47425								Tonicella lineata							Animalia	Mollusca	Polyplacophora	Chitonida	Tonicellidae	Tonicella	lineata		species		(Wood, 1815)
	imerss.org:PMLS:3421			Count: many		Andy Lamb								PRESENT				Tonicella insignis					iNaturalist:498132								Tonicella insignis							Animalia	Mollusca	Polyplacophora	Chitonida	Tonicellidae	Tonicella	insignis		species		(Reeve, 1847)
	imerss.org:PMLS:3422					Andy Lamb		2						PRESENT				Mopalia lignosa					iNaturalist:51724								Mopalia lignosa							Animalia	Mollusca	Polyplacophora	Chitonida	Mopaliidae	Mopalia	lignosa		species		(Gould, 1846)
	imerss.org:PMLS:3423					Andy Lamb		2						PRESENT				Mopalia vespertina					iNaturalist:364027								Mopalia vespertina							Animalia	Mollusca	Polyplacophora	Chitonida	Mopaliidae	Mopalia	vespertina		species		(Gould, 1852)
	imerss.org:PMLS:3424			Count: few		Andy Lamb								PRESENT				Lepidozona mertensii					iNaturalist:117621								Lepidozona mertensii							Animalia	Mollusca	Polyplacophora	Chitonida	Ischnochitonidae	Lepidozona	mertensii		species		(Middendorff, 1847)
	imerss.org:PMLS:3425					Andy Lamb		1						PRESENT				Lepidozona trifida					iNaturalist:1174737								Tripoplax trifida							Animalia	Mollusca	Polyplacophora	Chitonida	Ischnochitonidae	Tripoplax	trifida		species		(Carpenter, 1864)
	imerss.org:PMLS:3426			Count: few		Andy Lamb								PRESENT				Chlamys hastata					iNaturalist:180013								Chlamys hastata							Animalia	Mollusca	Bivalvia	Pectinida	Pectinidae	Chlamys	hastata		species		(G. B. Sowerby II, 1842)
	imerss.org:PMLS:3427					Andy Lamb		1						PRESENT				Crassadoma gigantea					iNaturalist:54526								Crassadoma gigantea							Animalia	Mollusca	Bivalvia	Pectinida	Pectinidae	Crassadoma	gigantea		species		(J.E. Gray, 1825)
	imerss.org:PMLS:3428			Count: some		Andy Lamb								PRESENT				Clinocardium nuttallii					iNaturalist:69925								Clinocardium nuttallii							Animalia	Mollusca	Bivalvia	Cardiida	Cardiidae	Clinocardium	nuttallii		species		(Conrad, 1837)
	imerss.org:PMLS:3429			Count: very many		Andy Lamb								PRESENT				Panopea generosa					iNaturalist:117618								Panopea generosa							Animalia	Mollusca	Bivalvia	Adapedonta	Hiatellidae	Panopea	generosa		species		Gould, 1850
	imerss.org:PMLS:3430			Count: some		Andy Lamb								PRESENT				Saxidomus gigantea					iNaturalist:130233								Saxidomus gigantea							Animalia	Mollusca	Bivalvia	Venerida	Veneridae	Saxidomus	gigantea		species		(Deshayes, 1839)
	imerss.org:PMLS:3431			Count: some		Andy Lamb								PRESENT				Entodesma navicula					iNaturalist:339164								Entodesma navicula							Animalia	Mollusca	Bivalvia		Lyonsiidae	Entodesma	navicula		species		(Adams & Reeve, 1850)
	imerss.org:PMLS:3432			Count: many		Andy Lamb								PRESENT				Nucella lamellosa					iNaturalist:117641								Nucella lamellosa							Animalia	Mollusca	Gastropoda	Neogastropoda	Muricidae	Nucella	lamellosa		species		(Gmelin, 1791)
	imerss.org:PMLS:3433					Andy Lamb		2						PRESENT				Neverita lewisii					iNaturalist:447427								Neverita lewisii							Animalia	Mollusca	Gastropoda	Littorinimorpha	Naticidae	Neverita	lewisii		species		(Gould, 1847)
	imerss.org:PMLS:3434					Andy Lamb		1						PRESENT				Diaulula lentiginosa					iNaturalist:568137								Peltodoris lentiginosa							Animalia	Mollusca	Gastropoda	Nudibranchia	Discodorididae	Peltodoris	lentiginosa		species		(Millen, 1982)
	imerss.org:PMLS:3435					Andy Lamb		2						PRESENT				Doris odhneri					iNaturalist:124210								Doris odhneri							Animalia	Mollusca	Gastropoda	Nudibranchia	Dorididae	Doris	odhneri		species		MacFarland, 1966
	imerss.org:PMLS:3436			Count: few		Andy Lamb								PRESENT				Cadlina luteomarginata complex					iNaturalist:50146								Cadlina luteomarginata							Animalia	Mollusca	Gastropoda	Nudibranchia	Cadlinidae	Cadlina	luteomarginata		species		MacFarland, 1966
	imerss.org:PMLS:3438			Count: abundant		Andy Lamb								PRESENT				Onchidoris bilamellata					iNaturalist:47480								Onchidoris bilamellata							Animalia	Mollusca	Gastropoda	Nudibranchia	Onchidorididae	Onchidoris	bilamellata		species		(Linnaeus, 1767)
	imerss.org:PMLS:3439			Count: abundant		Andy Lamb								PRESENT				Dendronotus iris					iNaturalist:47706								Dendronotus iris							Animalia	Mollusca	Gastropoda	Nudibranchia	Dendronotidae	Dendronotus	iris		species		J. G. Cooper, 1863
	imerss.org:PMLS:3440			Count: few		Andy Lamb								PRESENT				Dirona albolineata					iNaturalist:47477								Dirona albolineata							Animalia	Mollusca	Gastropoda	Nudibranchia	Dironidae	Dirona	albolineata		species		MacFarland, 1905
	imerss.org:PMLS:3549			Count: very many		Andy Lamb								PRESENT				Tonicella lineata					iNaturalist:47425								Tonicella lineata							Animalia	Mollusca	Polyplacophora	Chitonida	Tonicellidae	Tonicella	lineata		species		(Wood, 1815)
	imerss.org:PMLS:3550					Andy Lamb		2						PRESENT				Mopalia kennerelyi					iNaturalist:117634								Mopalia ciliata							Animalia	Mollusca	Polyplacophora	Chitonida	Mopaliidae	Mopalia	ciliata		species		(G. B. Sowerby II, 1840)
	imerss.org:PMLS:3551					Andy Lamb		2						PRESENT				Mopalia swanii					iNaturalist:339904								Mopalia swanii							Animalia	Mollusca	Polyplacophora	Chitonida	Mopaliidae	Mopalia	swanii		species		Carpenter, 1864
	imerss.org:PMLS:3552			Count: few		Andy Lamb								PRESENT				Mopalia hindsii					iNaturalist:51725								Mopalia hindsii							Animalia	Mollusca	Polyplacophora	Chitonida	Mopaliidae	Mopalia	hindsii		species		(Reeve, 1847)
	imerss.org:PMLS:3553			Count: some		Andy Lamb								PRESENT				Lepidozona mertensii					iNaturalist:117621								Lepidozona mertensii							Animalia	Mollusca	Polyplacophora	Chitonida	Ischnochitonidae	Lepidozona	mertensii		species		(Middendorff, 1847)
	imerss.org:PMLS:3554			Count: few		Andy Lamb								PRESENT				Lepidozona interstincta					iNaturalist:131231								Lepidozona interstincta							Animalia	Mollusca	Polyplacophora	Chitonida	Ischnochitonidae	Lepidozona	interstincta		species		(Gould, 1852)
	imerss.org:PMLS:3555			Count: few		Andy Lamb								PRESENT				Cryptochiton stelleri					iNaturalist:49053								Cryptochiton stelleri							Animalia	Mollusca	Polyplacophora	Chitonida	Acanthochitonidae	Cryptochiton	stelleri		species		(Middendorff, 1847)
	imerss.org:PMLS:3556			Count: some		Andy Lamb								PRESENT				Chlamys hastata					iNaturalist:180013								Chlamys hastata							Animalia	Mollusca	Bivalvia	Pectinida	Pectinidae	Chlamys	hastata		species		(G. B. Sowerby II, 1842)
	imerss.org:PMLS:3557					Andy Lamb		5						PRESENT				Crassadoma gigantea					iNaturalist:54526								Crassadoma gigantea							Animalia	Mollusca	Bivalvia	Pectinida	Pectinidae	Crassadoma	gigantea		species		(J.E. Gray, 1825)
	imerss.org:PMLS:3558			Count: few		Andy Lamb								PRESENT				Pododesmus macrochisma					iNaturalist:68652								Pododesmus macrochisma							Animalia	Mollusca	Bivalvia	Pectinida	Anomiidae	Pododesmus	macrochisma		species		(Deshayes, 1839)
	imerss.org:PMLS:3559			Count: few		Andy Lamb								PRESENT				Kellia suborbicularis					iNaturalist:253475								Kellia suborbicularis							Animalia	Mollusca	Bivalvia	Galeommatida	Lasaeidae	Kellia	suborbicularis		species		(Montagu, 1803)
	imerss.org:PMLS:3560					Andy Lamb		1						PRESENT				Clinocardium nuttallii					iNaturalist:69925								Clinocardium nuttallii							Animalia	Mollusca	Bivalvia	Cardiida	Cardiidae	Clinocardium	nuttallii		species		(Conrad, 1837)
	imerss.org:PMLS:3561					Andy Lamb		1						PRESENT				Tresus nuttallii					iNaturalist:117611								Tresus nuttallii							Animalia	Mollusca	Bivalvia	Venerida	Mactridae	Tresus	nuttallii		species		(Conrad, 1837)
	imerss.org:PMLS:3562			Count: some		Andy Lamb								PRESENT				Saxidomus gigantea					iNaturalist:130233								Saxidomus gigantea							Animalia	Mollusca	Bivalvia	Venerida	Veneridae	Saxidomus	gigantea		species		(Deshayes, 1839)
	imerss.org:PMLS:3563			Count: some		Andy Lamb								PRESENT				Humilaria kennerleyi					iNaturalist:873901								Humilaria kennerleyi							Animalia	Mollusca	Bivalvia	Venerida	Veneridae	Humilaria	kennerleyi		species		(Reeve, 1863)
	imerss.org:PMLS:3564					Andy Lamb		1						PRESENT				Entodesma navicula					iNaturalist:339164								Entodesma navicula							Animalia	Mollusca	Bivalvia		Lyonsiidae	Entodesma	navicula		species		(Adams & Reeve, 1850)
	imerss.org:PMLS:3565					Andy Lamb		1						PRESENT				Lottia scutum					iNaturalist:129962								Lottia scutum							Animalia	Mollusca	Gastropoda		Lottiidae	Lottia	scutum		species		(Rathke, 1833)
	imerss.org:PMLS:3566			Count: very many		Andy Lamb								PRESENT				Acmaea mitra					iNaturalist:47676								Acmaea mitra							Animalia	Mollusca	Gastropoda		Acmaeidae	Acmaea	mitra		species		Rathke, 1833
	imerss.org:PMLS:3567					Andy Lamb		2						PRESENT				Haliotis kamtschatkana					iNaturalist:56654								Haliotis kamtschatkana							Animalia	Mollusca	Gastropoda	Lepetellida	Haliotidae	Haliotis	kamtschatkana		species		Jonas, 1845
	imerss.org:PMLS:3568			Count: few		Andy Lamb								PRESENT				Nucella lamellosa					iNaturalist:117641								Nucella lamellosa							Animalia	Mollusca	Gastropoda	Neogastropoda	Muricidae	Nucella	lamellosa		species		(Gmelin, 1791)
	imerss.org:PMLS:3569			Count: few		Andy Lamb								PRESENT				Ceratostoma foliatum					iNaturalist:116687								Ceratostoma foliatum							Animalia	Mollusca	Gastropoda	Neogastropoda	Muricidae	Ceratostoma	foliatum		species		(Gmelin, 1791)
	imerss.org:PMLS:3570					Andy Lamb		1						PRESENT				Lirabuccinum dirum					iNaturalist:117642								Lirabuccinum dirum							Animalia	Mollusca	Gastropoda	Neogastropoda	Tudiclidae	Lirabuccinum	dirum		species		(Reeve, 1846)
	imerss.org:PMLS:3571			Count: few		Andy Lamb								PRESENT				Paciocinebrina lurida					iNaturalist:910800								Paciocinebrina lurida							Animalia	Mollusca	Gastropoda	Neogastropoda	Muricidae	Paciocinebrina	lurida		species		(Middendorff, 1848)
	imerss.org:PMLS:3572					Andy Lamb		2						PRESENT				Melanella micans					iNaturalist:733259								Melanella micans							Animalia	Mollusca	Gastropoda	Littorinimorpha	Eulimidae	Melanella	micans		species		(Carpenter, 1865)
	imerss.org:PMLS:3573			Count: few		Andy Lamb								PRESENT				Calliostoma ligatum					iNaturalist:129920								Calliostoma ligatum							Animalia	Mollusca	Gastropoda	Trochida	Calliostomatidae	Calliostoma	ligatum		species		(Gould, 1849)
	imerss.org:PMLS:3574			Count: some		Andy Lamb								PRESENT				Neverita lewisii					iNaturalist:447427								Neverita lewisii							Animalia	Mollusca	Gastropoda	Littorinimorpha	Naticidae	Neverita	lewisii		species		(Gould, 1847)
	imerss.org:PMLS:3575			Count: few		Andy Lamb								PRESENT				Vermetus compactus					iNaturalist:883089								Petaloconchus compactus							Animalia	Mollusca	Gastropoda	Littorinimorpha	Vermetidae	Petaloconchus	compactus		species
	imerss.org:PMLS:3576					Andy Lamb		2						PRESENT				Doris montereyensis					iNaturalist:47469								Doris montereyensis							Animalia	Mollusca	Gastropoda	Nudibranchia	Dorididae	Doris	montereyensis		species		J. G. Cooper, 1863
	imerss.org:PMLS:3577			Count: many		Andy Lamb								PRESENT				Geitodoris heathi					iNaturalist:47505								Geitodoris heathi							Animalia	Mollusca	Gastropoda	Nudibranchia	Discodorididae	Geitodoris	heathi		species		(MacFarland, 1905)
	imerss.org:PMLS:3578					Andy Lamb		2						PRESENT				Cadlina luteomarginata complex					iNaturalist:50146								Cadlina luteomarginata							Animalia	Mollusca	Gastropoda	Nudibranchia	Cadlinidae	Cadlina	luteomarginata		species		MacFarland, 1966
	imerss.org:PMLS:3579			Count: many		Andy Lamb								PRESENT				Cadlina luteomarginata complex					iNaturalist:50146								Cadlina luteomarginata							Animalia	Mollusca	Gastropoda	Nudibranchia	Cadlinidae	Cadlina	luteomarginata		species		MacFarland, 1966
	imerss.org:PMLS:3580			Count: some		Andy Lamb								PRESENT				Onchidoris bilamellata					iNaturalist:47480								Onchidoris bilamellata							Animalia	Mollusca	Gastropoda	Nudibranchia	Onchidorididae	Onchidoris	bilamellata		species		(Linnaeus, 1767)
	imerss.org:PMLS:3581			Count: few		Andy Lamb								PRESENT				Tochuina gigantea					iNaturalist:873733								Tochuina gigantea							Animalia	Mollusca	Gastropoda	Nudibranchia	Tritoniidae	Tochuina	gigantea		species		(Bergh, 1904)
	imerss.org:PMLS:3582			Count: abundant		Andy Lamb								PRESENT				Dendronotus iris					iNaturalist:47706								Dendronotus iris							Animalia	Mollusca	Gastropoda	Nudibranchia	Dendronotidae	Dendronotus	iris		species		J. G. Cooper, 1863
	imerss.org:PMLS:3583			Count: very many		Andy Lamb								PRESENT				Hermissenda crassicornis					iNaturalist:495552								Hermissenda crassicornis							Animalia	Mollusca	Gastropoda	Nudibranchia	Myrrhinidae	Hermissenda	crassicornis		species		(Eschscholtz, 1831)
	imerss.org:PMLS:3682			Count: few		Andy Lamb								PRESENT				Tonicella lineata					iNaturalist:47425								Tonicella lineata							Animalia	Mollusca	Polyplacophora	Chitonida	Tonicellidae	Tonicella	lineata		species		(Wood, 1815)
	imerss.org:PMLS:3683			Count: few		Andy Lamb								PRESENT				Tonicella insignis					iNaturalist:498132								Tonicella insignis							Animalia	Mollusca	Polyplacophora	Chitonida	Tonicellidae	Tonicella	insignis		species		(Reeve, 1847)
	imerss.org:PMLS:3684					Andy Lamb		2						PRESENT				Chlamys hastata					iNaturalist:180013								Chlamys hastata							Animalia	Mollusca	Bivalvia	Pectinida	Pectinidae	Chlamys	hastata		species		(G. B. Sowerby II, 1842)
	imerss.org:PMLS:3685			Count: very many		Andy Lamb								PRESENT				Crassadoma gigantea					iNaturalist:54526								Crassadoma gigantea							Animalia	Mollusca	Bivalvia	Pectinida	Pectinidae	Crassadoma	gigantea		species		(J.E. Gray, 1825)
	imerss.org:PMLS:3686			Count: few		Andy Lamb								PRESENT				Pododesmus macrochisma					iNaturalist:68652								Pododesmus macrochisma							Animalia	Mollusca	Bivalvia	Pectinida	Anomiidae	Pododesmus	macrochisma		species		(Deshayes, 1839)
	imerss.org:PMLS:3687			Count: few		Andy Lamb								PRESENT				Clinocardium nuttallii					iNaturalist:69925								Clinocardium nuttallii							Animalia	Mollusca	Bivalvia	Cardiida	Cardiidae	Clinocardium	nuttallii		species		(Conrad, 1837)
	imerss.org:PMLS:3688			Count: few		Andy Lamb								PRESENT				Entodesma navicula					iNaturalist:339164								Entodesma navicula							Animalia	Mollusca	Bivalvia		Lyonsiidae	Entodesma	navicula		species		(Adams & Reeve, 1850)
	imerss.org:PMLS:3689			Count: very many		Andy Lamb								PRESENT				Nucella lamellosa					iNaturalist:117641								Nucella lamellosa							Animalia	Mollusca	Gastropoda	Neogastropoda	Muricidae	Nucella	lamellosa		species		(Gmelin, 1791)
	imerss.org:PMLS:3690			Count: many		Andy Lamb								PRESENT				Ceratostoma foliatum					iNaturalist:116687								Ceratostoma foliatum							Animalia	Mollusca	Gastropoda	Neogastropoda	Muricidae	Ceratostoma	foliatum		species		(Gmelin, 1791)
	imerss.org:PMLS:3691					Andy Lamb		1						PRESENT				Paciocinebrina lurida					iNaturalist:910800								Paciocinebrina lurida							Animalia	Mollusca	Gastropoda	Neogastropoda	Muricidae	Paciocinebrina	lurida		species		(Middendorff, 1848)
	imerss.org:PMLS:3692					Andy Lamb		2						PRESENT				Diaulula lentiginosa					iNaturalist:568137								Peltodoris lentiginosa							Animalia	Mollusca	Gastropoda	Nudibranchia	Discodorididae	Peltodoris	lentiginosa		species		(Millen, 1982)
	imerss.org:PMLS:3693			Count: very many		Andy Lamb								PRESENT				Cadlina luteomarginata complex					iNaturalist:50146								Cadlina luteomarginata							Animalia	Mollusca	Gastropoda	Nudibranchia	Cadlinidae	Cadlina	luteomarginata		species		MacFarland, 1966
	imerss.org:PMLS:3694			Count: few		Andy Lamb								PRESENT				Acanthodoris hudsoni					iNaturalist:48447								Acanthodoris hudsoni							Animalia	Mollusca	Gastropoda	Nudibranchia	Onchidorididae	Acanthodoris	hudsoni		species		MacFarland, 1905
	imerss.org:PMLS:3695			Count: few		Andy Lamb								PRESENT				Dendronotus iris					iNaturalist:47706								Dendronotus iris							Animalia	Mollusca	Gastropoda	Nudibranchia	Dendronotidae	Dendronotus	iris		species		J. G. Cooper, 1863
	imerss.org:PMLS:3794			Count: some		Andy Lamb								PRESENT				Tonicella lineata					iNaturalist:47425								Tonicella lineata							Animalia	Mollusca	Polyplacophora	Chitonida	Tonicellidae	Tonicella	lineata		species		(Wood, 1815)
	imerss.org:PMLS:3795			Count: some		Andy Lamb								PRESENT				Tonicella insignis					iNaturalist:498132								Tonicella insignis							Animalia	Mollusca	Polyplacophora	Chitonida	Tonicellidae	Tonicella	insignis		species		(Reeve, 1847)
	imerss.org:PMLS:3796			Count: few		Andy Lamb								PRESENT				Cryptochiton stelleri					iNaturalist:49053								Cryptochiton stelleri							Animalia	Mollusca	Polyplacophora	Chitonida	Acanthochitonidae	Cryptochiton	stelleri		species		(Middendorff, 1847)
	imerss.org:PMLS:3797					Andy Lamb		2						PRESENT				Chlamys hastata					iNaturalist:180013								Chlamys hastata							Animalia	Mollusca	Bivalvia	Pectinida	Pectinidae	Chlamys	hastata		species		(G. B. Sowerby II, 1842)
	imerss.org:PMLS:3798			Count: many		Andy Lamb								PRESENT				Crassadoma gigantea					iNaturalist:54526								Crassadoma gigantea							Animalia	Mollusca	Bivalvia	Pectinida	Pectinidae	Crassadoma	gigantea		species		(J.E. Gray, 1825)
	imerss.org:PMLS:3799			Count: few		Andy Lamb								PRESENT				Mytilimeria nuttalli					iNaturalist:873896								Mytilimeria nuttalli							Animalia	Mollusca	Bivalvia		Lyonsiidae	Mytilimeria	nuttalli		species		Conrad, 1837
	imerss.org:PMLS:3800					Andy Lamb		1						PRESENT				Entodesma navicula					iNaturalist:339164								Entodesma navicula							Animalia	Mollusca	Bivalvia		Lyonsiidae	Entodesma	navicula		species		(Adams & Reeve, 1850)
	imerss.org:PMLS:3801					Andy Lamb		1						PRESENT				Haliotis kamtschatkana					iNaturalist:56654								Haliotis kamtschatkana							Animalia	Mollusca	Gastropoda	Lepetellida	Haliotidae	Haliotis	kamtschatkana		species		Jonas, 1845
	imerss.org:PMLS:3802			Count: few		Andy Lamb								PRESENT				Nucella lamellosa					iNaturalist:117641								Nucella lamellosa							Animalia	Mollusca	Gastropoda	Neogastropoda	Muricidae	Nucella	lamellosa		species		(Gmelin, 1791)
	imerss.org:PMLS:3803			Count: few		Andy Lamb								PRESENT				Ceratostoma foliatum					iNaturalist:116687								Ceratostoma foliatum							Animalia	Mollusca	Gastropoda	Neogastropoda	Muricidae	Ceratostoma	foliatum		species		(Gmelin, 1791)
	imerss.org:PMLS:3804			Count: few		Andy Lamb								PRESENT				Amphissa columbiana					iNaturalist:117643								Amphissa columbiana							Animalia	Mollusca	Gastropoda	Neogastropoda	Columbellidae	Amphissa	columbiana		species		Dall, 1916
	imerss.org:PMLS:3805			Count: few		Andy Lamb								PRESENT				Peltodoris nobilis					iNaturalist:48450								Peltodoris nobilis							Animalia	Mollusca	Gastropoda	Nudibranchia	Discodorididae	Peltodoris	nobilis		species		(MacFarland, 1905)
	imerss.org:PMLS:3806			Count: some		Andy Lamb								PRESENT				Cadlina luteomarginata complex					iNaturalist:50146								Cadlina luteomarginata							Animalia	Mollusca	Gastropoda	Nudibranchia	Cadlinidae	Cadlina	luteomarginata		species		MacFarland, 1966
	imerss.org:PMLS:3807			Count: few		Andy Lamb								PRESENT				Himatina trophina					iNaturalist:633561								Himatina trophina							Animalia	Mollusca	Gastropoda	Nudibranchia	Coryphellidae	Himatina	trophina		species		(Bergh, 1890)
	imerss.org:PMLS:3920			Count: some		Andy Lamb								PRESENT				Tonicella lineata					iNaturalist:47425								Tonicella lineata							Animalia	Mollusca	Polyplacophora	Chitonida	Tonicellidae	Tonicella	lineata		species		(Wood, 1815)
	imerss.org:PMLS:3921			Count: few		Andy Lamb								PRESENT				Mopalia kennerelyi					iNaturalist:117634								Mopalia ciliata							Animalia	Mollusca	Polyplacophora	Chitonida	Mopaliidae	Mopalia	ciliata		species		(G. B. Sowerby II, 1840)
	imerss.org:PMLS:3922			Count: very many		Andy Lamb								PRESENT				Mopalia vespertina					iNaturalist:364027								Mopalia vespertina							Animalia	Mollusca	Polyplacophora	Chitonida	Mopaliidae	Mopalia	vespertina		species		(Gould, 1852)
	imerss.org:PMLS:3923			Count: many		Andy Lamb								PRESENT				Cryptochiton stelleri					iNaturalist:49053								Cryptochiton stelleri							Animalia	Mollusca	Polyplacophora	Chitonida	Acanthochitonidae	Cryptochiton	stelleri		species		(Middendorff, 1847)
	imerss.org:PMLS:3924			Count: many		Andy Lamb								PRESENT				Mytilus edulis complex					iNaturalist:1108240								Mytilus edulis							Animalia	Mollusca	Bivalvia	Mytilida	Mytilidae	Mytilus	edulis		species
	imerss.org:PMLS:3925			Count: abundant		Andy Lamb								PRESENT				Crassadoma gigantea					iNaturalist:54526								Crassadoma gigantea							Animalia	Mollusca	Bivalvia	Pectinida	Pectinidae	Crassadoma	gigantea		species		(J.E. Gray, 1825)
	imerss.org:PMLS:3926			Count: very many		Andy Lamb								PRESENT				Pododesmus macrochisma					iNaturalist:68652								Pododesmus macrochisma							Animalia	Mollusca	Bivalvia	Pectinida	Anomiidae	Pododesmus	macrochisma		species		(Deshayes, 1839)
	imerss.org:PMLS:3927			Count: many		Andy Lamb								PRESENT				Entodesma navicula					iNaturalist:339164								Entodesma navicula							Animalia	Mollusca	Bivalvia		Lyonsiidae	Entodesma	navicula		species		(Adams & Reeve, 1850)
	imerss.org:PMLS:3928			Count: many		Andy Lamb								PRESENT				Diodora aspera					iNaturalist:64148								Diodora aspera							Animalia	Mollusca	Gastropoda	Lepetellida	Fissurellidae	Diodora	aspera		species		(Rathke, 1833)
	imerss.org:PMLS:3929			Count: abundant		Andy Lamb								PRESENT				Nucella canaliculata					iNaturalist:69998								Nucella canaliculata							Animalia	Mollusca	Gastropoda	Neogastropoda	Muricidae	Nucella	canaliculata		species		(Duclos, 1832)
	imerss.org:PMLS:3930			Count: many		Andy Lamb								PRESENT				Ceratostoma foliatum					iNaturalist:116687								Ceratostoma foliatum							Animalia	Mollusca	Gastropoda	Neogastropoda	Muricidae	Ceratostoma	foliatum		species		(Gmelin, 1791)
	imerss.org:PMLS:3931			Count: many		Andy Lamb								PRESENT				Paciocinebrina lurida					iNaturalist:910800								Paciocinebrina lurida							Animalia	Mollusca	Gastropoda	Neogastropoda	Muricidae	Paciocinebrina	lurida		species		(Middendorff, 1848)
	imerss.org:PMLS:3932			Count: some		Andy Lamb								PRESENT				Calliostoma ligatum					iNaturalist:129920								Calliostoma ligatum							Animalia	Mollusca	Gastropoda	Trochida	Calliostomatidae	Calliostoma	ligatum		species		(Gould, 1849)
	imerss.org:PMLS:3933			Count: few		Andy Lamb								PRESENT				Peltodoris nobilis					iNaturalist:48450								Peltodoris nobilis							Animalia	Mollusca	Gastropoda	Nudibranchia	Discodorididae	Peltodoris	nobilis		species		(MacFarland, 1905)
	imerss.org:PMLS:3934			Count: few		Andy Lamb								PRESENT				Doris montereyensis					iNaturalist:47469								Doris montereyensis							Animalia	Mollusca	Gastropoda	Nudibranchia	Dorididae	Doris	montereyensis		species		J. G. Cooper, 1863
	imerss.org:PMLS:3935					Andy Lamb		1						PRESENT				Limacia cockerelli					iNaturalist:538830								Limacia cockerelli							Animalia	Mollusca	Gastropoda	Nudibranchia	Polyceridae	Limacia	cockerelli		species		(MacFarland, 1905)
	imerss.org:PMLS:3936					Andy Lamb		2						PRESENT				Hermissenda crassicornis					iNaturalist:495552								Hermissenda crassicornis							Animalia	Mollusca	Gastropoda	Nudibranchia	Myrrhinidae	Hermissenda	crassicornis		species		(Eschscholtz, 1831)
	imerss.org:PMLS:3937					Andy Lamb		3						PRESENT				Orienthella trilineata					iNaturalist:764704								Orienthella trilineata							Animalia	Mollusca	Gastropoda	Nudibranchia	Coryphellidae	Orienthella	trilineata		species		(O'Donoghue, 1921)
	imerss.org:PMLS:4005			Count: very many		Andy Lamb								PRESENT				Tonicella lineata					iNaturalist:47425								Tonicella lineata							Animalia	Mollusca	Polyplacophora	Chitonida	Tonicellidae	Tonicella	lineata		species		(Wood, 1815)
	imerss.org:PMLS:4006					Andy Lamb		2						PRESENT				Tonicella insignis					iNaturalist:498132								Tonicella insignis							Animalia	Mollusca	Polyplacophora	Chitonida	Tonicellidae	Tonicella	insignis		species		(Reeve, 1847)
	imerss.org:PMLS:4007					Andy Lamb		2						PRESENT				Mopalia lignosa					iNaturalist:51724								Mopalia lignosa							Animalia	Mollusca	Polyplacophora	Chitonida	Mopaliidae	Mopalia	lignosa		species		(Gould, 1846)
	imerss.org:PMLS:4008					Andy Lamb		1						PRESENT				Mopalia swanii					iNaturalist:339904								Mopalia swanii							Animalia	Mollusca	Polyplacophora	Chitonida	Mopaliidae	Mopalia	swanii		species		Carpenter, 1864
	imerss.org:PMLS:4009			Count: very many		Andy Lamb								PRESENT				Chlamys hastata					iNaturalist:180013								Chlamys hastata							Animalia	Mollusca	Bivalvia	Pectinida	Pectinidae	Chlamys	hastata		species		(G. B. Sowerby II, 1842)
	imerss.org:PMLS:4010			Count: few		Andy Lamb								PRESENT				Crassadoma gigantea					iNaturalist:54526								Crassadoma gigantea							Animalia	Mollusca	Bivalvia	Pectinida	Pectinidae	Crassadoma	gigantea		species		(J.E. Gray, 1825)
	imerss.org:PMLS:4011			Count: few		Andy Lamb								PRESENT				Humilaria kennerleyi					iNaturalist:873901								Humilaria kennerleyi							Animalia	Mollusca	Bivalvia	Venerida	Veneridae	Humilaria	kennerleyi		species		(Reeve, 1863)
	imerss.org:PMLS:4012					Andy Lamb		1						PRESENT				Entodesma navicula					iNaturalist:339164								Entodesma navicula							Animalia	Mollusca	Bivalvia		Lyonsiidae	Entodesma	navicula		species		(Adams & Reeve, 1850)
	imerss.org:PMLS:4013			Count: some		Andy Lamb								PRESENT				Acmaea mitra					iNaturalist:47676								Acmaea mitra							Animalia	Mollusca	Gastropoda		Acmaeidae	Acmaea	mitra		species		Rathke, 1833
	imerss.org:PMLS:4014					Andy Lamb		1						PRESENT				Haliotis kamtschatkana					iNaturalist:56654								Haliotis kamtschatkana							Animalia	Mollusca	Gastropoda	Lepetellida	Haliotidae	Haliotis	kamtschatkana		species		Jonas, 1845
	imerss.org:PMLS:4015			Count: some		Andy Lamb								PRESENT				Nucella lamellosa					iNaturalist:117641								Nucella lamellosa							Animalia	Mollusca	Gastropoda	Neogastropoda	Muricidae	Nucella	lamellosa		species		(Gmelin, 1791)
	imerss.org:PMLS:4016			Count: few		Andy Lamb								PRESENT				Ceratostoma foliatum					iNaturalist:116687								Ceratostoma foliatum							Animalia	Mollusca	Gastropoda	Neogastropoda	Muricidae	Ceratostoma	foliatum		species		(Gmelin, 1791)
	imerss.org:PMLS:4017					Andy Lamb		3						PRESENT				Paciocinebrina lurida					iNaturalist:910800								Paciocinebrina lurida							Animalia	Mollusca	Gastropoda	Neogastropoda	Muricidae	Paciocinebrina	lurida		species		(Middendorff, 1848)
	imerss.org:PMLS:4018					Andy Lamb		1						PRESENT				Scabrotrophon maltzani					iNaturalist:500269								Scabrotrophon maltzani							Animalia	Mollusca	Gastropoda	Neogastropoda	Muricidae	Scabrotrophon	maltzani		species		(Kobelt, 1878)
	imerss.org:PMLS:4019			Count: few		Andy Lamb								PRESENT				Calliostoma ligatum					iNaturalist:129920								Calliostoma ligatum							Animalia	Mollusca	Gastropoda	Trochida	Calliostomatidae	Calliostoma	ligatum		species		(Gould, 1849)
	imerss.org:PMLS:4020			Count: few		Andy Lamb								PRESENT				Peltodoris nobilis					iNaturalist:48450								Peltodoris nobilis							Animalia	Mollusca	Gastropoda	Nudibranchia	Discodorididae	Peltodoris	nobilis		species		(MacFarland, 1905)
	imerss.org:PMLS:4021			Count: few		Andy Lamb								PRESENT				Doris montereyensis					iNaturalist:47469								Doris montereyensis							Animalia	Mollusca	Gastropoda	Nudibranchia	Dorididae	Doris	montereyensis		species		J. G. Cooper, 1863
	imerss.org:PMLS:4022					Andy Lamb		1						PRESENT				Doris odhneri					iNaturalist:124210								Doris odhneri							Animalia	Mollusca	Gastropoda	Nudibranchia	Dorididae	Doris	odhneri		species		MacFarland, 1966
	imerss.org:PMLS:4023			Count: few		Andy Lamb								PRESENT				Cadlina luteomarginata complex					iNaturalist:50146								Cadlina luteomarginata							Animalia	Mollusca	Gastropoda	Nudibranchia	Cadlinidae	Cadlina	luteomarginata		species		MacFarland, 1966
	imerss.org:PMLS:4024					Andy Lamb		2						PRESENT				Acanthodoris hudsoni					iNaturalist:48447								Acanthodoris hudsoni							Animalia	Mollusca	Gastropoda	Nudibranchia	Onchidorididae	Acanthodoris	hudsoni		species		MacFarland, 1905
	imerss.org:PMLS:4025					Andy Lamb		2						PRESENT				Acanthodoris nanaimoensis					iNaturalist:47476								Acanthodoris nanaimoensis							Animalia	Mollusca	Gastropoda	Nudibranchia	Onchidorididae	Acanthodoris	nanaimoensis		species		O'Donoghue, 1921
	imerss.org:PMLS:4026					Andy Lamb		1						PRESENT				Dendronotus iris					iNaturalist:47706								Dendronotus iris							Animalia	Mollusca	Gastropoda	Nudibranchia	Dendronotidae	Dendronotus	iris		species		J. G. Cooper, 1863
	imerss.org:PMLS:4027					Andy Lamb		1						PRESENT				Himatina trophina					iNaturalist:633561								Himatina trophina							Animalia	Mollusca	Gastropoda	Nudibranchia	Coryphellidae	Himatina	trophina		species		(Bergh, 1890)
	imerss.org:PMLS:4124			Count: some		Andy Lamb								PRESENT				Tonicella lineata					iNaturalist:47425								Tonicella lineata							Animalia	Mollusca	Polyplacophora	Chitonida	Tonicellidae	Tonicella	lineata		species		(Wood, 1815)
	imerss.org:PMLS:4125			Count: few		Andy Lamb								PRESENT				Tonicella insignis					iNaturalist:498132								Tonicella insignis							Animalia	Mollusca	Polyplacophora	Chitonida	Tonicellidae	Tonicella	insignis		species		(Reeve, 1847)
	imerss.org:PMLS:4126			Count: few		Andy Lamb								PRESENT				Lepidozona mertensii					iNaturalist:117621								Lepidozona mertensii							Animalia	Mollusca	Polyplacophora	Chitonida	Ischnochitonidae	Lepidozona	mertensii		species		(Middendorff, 1847)
	imerss.org:PMLS:4127					Andy Lamb		1						PRESENT				Cryptochiton stelleri					iNaturalist:49053								Cryptochiton stelleri							Animalia	Mollusca	Polyplacophora	Chitonida	Acanthochitonidae	Cryptochiton	stelleri		species		(Middendorff, 1847)
	imerss.org:PMLS:4128			Count: many		Andy Lamb								PRESENT				Chlamys hastata					iNaturalist:180013								Chlamys hastata							Animalia	Mollusca	Bivalvia	Pectinida	Pectinidae	Chlamys	hastata		species		(G. B. Sowerby II, 1842)
	imerss.org:PMLS:4129			Count: some		Andy Lamb								PRESENT				Crassadoma gigantea					iNaturalist:54526								Crassadoma gigantea							Animalia	Mollusca	Bivalvia	Pectinida	Pectinidae	Crassadoma	gigantea		species		(J.E. Gray, 1825)
	imerss.org:PMLS:4130					Andy Lamb		2						PRESENT				Entodesma navicula					iNaturalist:339164								Entodesma navicula							Animalia	Mollusca	Bivalvia		Lyonsiidae	Entodesma	navicula		species		(Adams & Reeve, 1850)
	imerss.org:PMLS:4131			Count: some		Andy Lamb								PRESENT				Nucella lamellosa					iNaturalist:117641								Nucella lamellosa							Animalia	Mollusca	Gastropoda	Neogastropoda	Muricidae	Nucella	lamellosa		species		(Gmelin, 1791)
	imerss.org:PMLS:4132			Count: few		Andy Lamb								PRESENT				Ceratostoma foliatum					iNaturalist:116687								Ceratostoma foliatum							Animalia	Mollusca	Gastropoda	Neogastropoda	Muricidae	Ceratostoma	foliatum		species		(Gmelin, 1791)
	imerss.org:PMLS:4133			Count: some		Andy Lamb								PRESENT				Lirabuccinum dirum					iNaturalist:117642								Lirabuccinum dirum							Animalia	Mollusca	Gastropoda	Neogastropoda	Tudiclidae	Lirabuccinum	dirum		species		(Reeve, 1846)
	imerss.org:PMLS:4134			Count: few		Andy Lamb								PRESENT				Paciocinebrina lurida					iNaturalist:910800								Paciocinebrina lurida							Animalia	Mollusca	Gastropoda	Neogastropoda	Muricidae	Paciocinebrina	lurida		species		(Middendorff, 1848)
	imerss.org:PMLS:4135					Andy Lamb		2						PRESENT				Peltodoris nobilis					iNaturalist:48450								Peltodoris nobilis							Animalia	Mollusca	Gastropoda	Nudibranchia	Discodorididae	Peltodoris	nobilis		species		(MacFarland, 1905)
	imerss.org:PMLS:4136			Count: few		Andy Lamb								PRESENT				Cadlina luteomarginata complex					iNaturalist:50146								Cadlina luteomarginata							Animalia	Mollusca	Gastropoda	Nudibranchia	Cadlinidae	Cadlina	luteomarginata		species		MacFarland, 1966
	imerss.org:PMLS:4137					Andy Lamb		1						PRESENT				Acanthodoris nanaimoensis					iNaturalist:47476								Acanthodoris nanaimoensis							Animalia	Mollusca	Gastropoda	Nudibranchia	Onchidorididae	Acanthodoris	nanaimoensis		species		O'Donoghue, 1921
	imerss.org:PMLS:4138					Andy Lamb		1						PRESENT				Enteroctopus dofleini					iNaturalist:48863								Enteroctopus dofleini							Animalia	Mollusca	Cephalopoda	Octopoda	Enteroctopodidae	Enteroctopus	dofleini		species		(Wülker, 1910)
	imerss.org:PMLS:4235			Count: few		Andy Lamb								PRESENT				Tonicella lineata					iNaturalist:47425								Tonicella lineata							Animalia	Mollusca	Polyplacophora	Chitonida	Tonicellidae	Tonicella	lineata		species		(Wood, 1815)
	imerss.org:PMLS:4236			Count: few		Andy Lamb								PRESENT				Lepidozona mertensii					iNaturalist:117621								Lepidozona mertensii							Animalia	Mollusca	Polyplacophora	Chitonida	Ischnochitonidae	Lepidozona	mertensii		species		(Middendorff, 1847)
	imerss.org:PMLS:4237					Andy Lamb		1						PRESENT				Placiphorella rufa					iNaturalist:547332								Placiphorella rufa							Animalia	Mollusca	Polyplacophora	Chitonida	Mopaliidae	Placiphorella	rufa		species		Berry, 1917
	imerss.org:PMLS:4238			Count: few		Andy Lamb								PRESENT				Cryptochiton stelleri					iNaturalist:49053								Cryptochiton stelleri							Animalia	Mollusca	Polyplacophora	Chitonida	Acanthochitonidae	Cryptochiton	stelleri		species		(Middendorff, 1847)
	imerss.org:PMLS:4239			Count: some		Andy Lamb								PRESENT				Chlamys hastata					iNaturalist:180013								Chlamys hastata							Animalia	Mollusca	Bivalvia	Pectinida	Pectinidae	Chlamys	hastata		species		(G. B. Sowerby II, 1842)
	imerss.org:PMLS:4240			Count: very many		Andy Lamb								PRESENT				Crassadoma gigantea					iNaturalist:54526								Crassadoma gigantea							Animalia	Mollusca	Bivalvia	Pectinida	Pectinidae	Crassadoma	gigantea		species		(J.E. Gray, 1825)
	imerss.org:PMLS:4241			Count: some		Andy Lamb								PRESENT				Pododesmus macrochisma					iNaturalist:68652								Pododesmus macrochisma							Animalia	Mollusca	Bivalvia	Pectinida	Anomiidae	Pododesmus	macrochisma		species		(Deshayes, 1839)
	imerss.org:PMLS:4242			Count: few		Andy Lamb								PRESENT				Humilaria kennerleyi					iNaturalist:873901								Humilaria kennerleyi							Animalia	Mollusca	Bivalvia	Venerida	Veneridae	Humilaria	kennerleyi		species		(Reeve, 1863)
	imerss.org:PMLS:4243					Andy Lamb		2						PRESENT				Entodesma navicula					iNaturalist:339164								Entodesma navicula							Animalia	Mollusca	Bivalvia		Lyonsiidae	Entodesma	navicula		species		(Adams & Reeve, 1850)
	imerss.org:PMLS:4244			Count: few		Andy Lamb								PRESENT				Acmaea mitra					iNaturalist:47676								Acmaea mitra							Animalia	Mollusca	Gastropoda		Acmaeidae	Acmaea	mitra		species		Rathke, 1833
	imerss.org:PMLS:4245			Count: many		Andy Lamb								PRESENT				Nucella lamellosa					iNaturalist:117641								Nucella lamellosa							Animalia	Mollusca	Gastropoda	Neogastropoda	Muricidae	Nucella	lamellosa		species		(Gmelin, 1791)
	imerss.org:PMLS:4246			Count: many		Andy Lamb								PRESENT				Ceratostoma foliatum					iNaturalist:116687								Ceratostoma foliatum							Animalia	Mollusca	Gastropoda	Neogastropoda	Muricidae	Ceratostoma	foliatum		species		(Gmelin, 1791)
	imerss.org:PMLS:4247			Count: few		Andy Lamb								PRESENT				Lirabuccinum dirum					iNaturalist:117642								Lirabuccinum dirum							Animalia	Mollusca	Gastropoda	Neogastropoda	Tudiclidae	Lirabuccinum	dirum		species		(Reeve, 1846)
	imerss.org:PMLS:4248			Count: few		Andy Lamb								PRESENT				Paciocinebrina lurida					iNaturalist:910800								Paciocinebrina lurida							Animalia	Mollusca	Gastropoda	Neogastropoda	Muricidae	Paciocinebrina	lurida		species		(Middendorff, 1848)
	imerss.org:PMLS:4249					Andy Lamb		2						PRESENT				Scabrotrophon maltzani					iNaturalist:500269								Scabrotrophon maltzani							Animalia	Mollusca	Gastropoda	Neogastropoda	Muricidae	Scabrotrophon	maltzani		species		(Kobelt, 1878)
	imerss.org:PMLS:4250			Count: few		Andy Lamb								PRESENT				Calliostoma ligatum					iNaturalist:129920								Calliostoma ligatum							Animalia	Mollusca	Gastropoda	Trochida	Calliostomatidae	Calliostoma	ligatum		species		(Gould, 1849)
	imerss.org:PMLS:4251					Andy Lamb		2						PRESENT				Doris odhneri					iNaturalist:124210								Doris odhneri							Animalia	Mollusca	Gastropoda	Nudibranchia	Dorididae	Doris	odhneri		species		MacFarland, 1966
	imerss.org:PMLS:4252					Andy Lamb		1						PRESENT				Diaulula odonoghuei					iNaturalist:508237								Diaulula odonoghuei							Animalia	Mollusca	Gastropoda	Nudibranchia	Discodorididae	Diaulula	odonoghuei		species		(Steinberg, 1963)
	imerss.org:PMLS:4253			Count: some		Andy Lamb								PRESENT				Cadlina luteomarginata complex					iNaturalist:50146								Cadlina luteomarginata							Animalia	Mollusca	Gastropoda	Nudibranchia	Cadlinidae	Cadlina	luteomarginata		species		MacFarland, 1966
	imerss.org:PMLS:4254					Andy Lamb		1						PRESENT				Dirona albolineata					iNaturalist:47477								Dirona albolineata							Animalia	Mollusca	Gastropoda	Nudibranchia	Dironidae	Dirona	albolineata		species		MacFarland, 1905
	imerss.org:PMLS:4255					Andy Lamb		1						PRESENT				Dirona pellucida					iNaturalist:50447								Dirona pellucida							Animalia	Mollusca	Gastropoda	Nudibranchia	Dironidae	Dirona	pellucida		species		Volodchenko, 1941
	imerss.org:PMLS:4256					Andy Lamb		1						PRESENT				Enteroctopus dofleini					iNaturalist:48863								Enteroctopus dofleini							Animalia	Mollusca	Cephalopoda	Octopoda	Enteroctopodidae	Enteroctopus	dofleini		species		(Wülker, 1910)
	imerss.org:PMLS:4348			Count: some		Andy Lamb								PRESENT				Tonicella lineata					iNaturalist:47425								Tonicella lineata							Animalia	Mollusca	Polyplacophora	Chitonida	Tonicellidae	Tonicella	lineata		species		(Wood, 1815)
	imerss.org:PMLS:4349			Count: few		Andy Lamb								PRESENT				Tonicella insignis					iNaturalist:498132								Tonicella insignis							Animalia	Mollusca	Polyplacophora	Chitonida	Tonicellidae	Tonicella	insignis		species		(Reeve, 1847)
	imerss.org:PMLS:4350					Andy Lamb		1						PRESENT				Mopalia swanii					iNaturalist:339904								Mopalia swanii							Animalia	Mollusca	Polyplacophora	Chitonida	Mopaliidae	Mopalia	swanii		species		Carpenter, 1864
	imerss.org:PMLS:4351					Andy Lamb		2						PRESENT				Lepidozona mertensii					iNaturalist:117621								Lepidozona mertensii							Animalia	Mollusca	Polyplacophora	Chitonida	Ischnochitonidae	Lepidozona	mertensii		species		(Middendorff, 1847)
	imerss.org:PMLS:4352			Count: some		Andy Lamb								PRESENT				Chlamys hastata					iNaturalist:180013								Chlamys hastata							Animalia	Mollusca	Bivalvia	Pectinida	Pectinidae	Chlamys	hastata		species		(G. B. Sowerby II, 1842)
	imerss.org:PMLS:4353			Count: many		Andy Lamb								PRESENT				Crassadoma gigantea					iNaturalist:54526								Crassadoma gigantea							Animalia	Mollusca	Bivalvia	Pectinida	Pectinidae	Crassadoma	gigantea		species		(J.E. Gray, 1825)
	imerss.org:PMLS:4354			Count: some		Andy Lamb								PRESENT				Pododesmus macrochisma					iNaturalist:68652								Pododesmus macrochisma							Animalia	Mollusca	Bivalvia	Pectinida	Anomiidae	Pododesmus	macrochisma		species		(Deshayes, 1839)
	imerss.org:PMLS:4355			Count: few		Andy Lamb								PRESENT				Humilaria kennerleyi					iNaturalist:873901								Humilaria kennerleyi							Animalia	Mollusca	Bivalvia	Venerida	Veneridae	Humilaria	kennerleyi		species		(Reeve, 1863)
	imerss.org:PMLS:4356					Andy Lamb		2						PRESENT				Haliotis kamtschatkana					iNaturalist:56654								Haliotis kamtschatkana							Animalia	Mollusca	Gastropoda	Lepetellida	Haliotidae	Haliotis	kamtschatkana		species		Jonas, 1845
	imerss.org:PMLS:4357			Count: some		Andy Lamb								PRESENT				Nucella lamellosa					iNaturalist:117641								Nucella lamellosa							Animalia	Mollusca	Gastropoda	Neogastropoda	Muricidae	Nucella	lamellosa		species		(Gmelin, 1791)
	imerss.org:PMLS:4358			Count: some		Andy Lamb								PRESENT				Ceratostoma foliatum					iNaturalist:116687								Ceratostoma foliatum							Animalia	Mollusca	Gastropoda	Neogastropoda	Muricidae	Ceratostoma	foliatum		species		(Gmelin, 1791)
	imerss.org:PMLS:4359					Andy Lamb		2						PRESENT				Amphissa columbiana					iNaturalist:117643								Amphissa columbiana							Animalia	Mollusca	Gastropoda	Neogastropoda	Columbellidae	Amphissa	columbiana		species		Dall, 1916
	imerss.org:PMLS:4360			Count: some		Andy Lamb								PRESENT				Paciocinebrina lurida					iNaturalist:910800								Paciocinebrina lurida							Animalia	Mollusca	Gastropoda	Neogastropoda	Muricidae	Paciocinebrina	lurida		species		(Middendorff, 1848)
	imerss.org:PMLS:4361			Count: some		Andy Lamb								PRESENT				Vermetus compactus					iNaturalist:883089								Petaloconchus compactus							Animalia	Mollusca	Gastropoda	Littorinimorpha	Vermetidae	Petaloconchus	compactus		species
	imerss.org:PMLS:4362			Count: few		Andy Lamb								PRESENT				Peltodoris nobilis					iNaturalist:48450								Peltodoris nobilis							Animalia	Mollusca	Gastropoda	Nudibranchia	Discodorididae	Peltodoris	nobilis		species		(MacFarland, 1905)
	imerss.org:PMLS:4363					Andy Lamb		2						PRESENT				Doris odhneri					iNaturalist:124210								Doris odhneri							Animalia	Mollusca	Gastropoda	Nudibranchia	Dorididae	Doris	odhneri		species		MacFarland, 1966
	imerss.org:PMLS:4364			Count: few		Andy Lamb								PRESENT				Cadlina luteomarginata complex					iNaturalist:50146								Cadlina luteomarginata							Animalia	Mollusca	Gastropoda	Nudibranchia	Cadlinidae	Cadlina	luteomarginata		species		MacFarland, 1966
	imerss.org:PMLS:4365					Andy Lamb		2						PRESENT				Dendronotus iris					iNaturalist:47706								Dendronotus iris							Animalia	Mollusca	Gastropoda	Nudibranchia	Dendronotidae	Dendronotus	iris		species		J. G. Cooper, 1863
	imerss.org:PMLS:4366					Andy Lamb		1						PRESENT				Himatina trophina					iNaturalist:633561								Himatina trophina							Animalia	Mollusca	Gastropoda	Nudibranchia	Coryphellidae	Himatina	trophina		species		(Bergh, 1890)
	imerss.org:PMLS:4432			Count: some		Charlie Gibbs								PRESENT				Tonicella lineata					iNaturalist:47425								Tonicella lineata							Animalia	Mollusca	Polyplacophora	Chitonida	Tonicellidae	Tonicella	lineata		species		(Wood, 1815)
	imerss.org:PMLS:4433			Count: some		Charlie Gibbs								PRESENT				Tonicella insignis					iNaturalist:498132								Tonicella insignis							Animalia	Mollusca	Polyplacophora	Chitonida	Tonicellidae	Tonicella	insignis		species		(Reeve, 1847)
	imerss.org:PMLS:4434			Count: few		Charlie Gibbs								PRESENT				Chlamys sp.					iNaturalist:84497								Chlamys							Animalia	Mollusca	Bivalvia	Pectinida	Pectinidae	Chlamys			genus
	imerss.org:PMLS:4435			Count: some		Charlie Gibbs								PRESENT				Crassadoma gigantea					iNaturalist:54526								Crassadoma gigantea							Animalia	Mollusca	Bivalvia	Pectinida	Pectinidae	Crassadoma	gigantea		species		(J.E. Gray, 1825)
	imerss.org:PMLS:4436					Charlie Gibbs		1						PRESENT				Entodesma navicula					iNaturalist:339164								Entodesma navicula							Animalia	Mollusca	Bivalvia		Lyonsiidae	Entodesma	navicula		species		(Adams & Reeve, 1850)
	imerss.org:PMLS:4437					Charlie Gibbs		1						PRESENT				Diodora aspera					iNaturalist:64148								Diodora aspera							Animalia	Mollusca	Gastropoda	Lepetellida	Fissurellidae	Diodora	aspera		species		(Rathke, 1833)
	imerss.org:PMLS:4438			Count: many		Charlie Gibbs								PRESENT				Nucella lamellosa					iNaturalist:117641								Nucella lamellosa							Animalia	Mollusca	Gastropoda	Neogastropoda	Muricidae	Nucella	lamellosa		species		(Gmelin, 1791)
	imerss.org:PMLS:4439			Count: some		Charlie Gibbs								PRESENT				Ceratostoma foliatum					iNaturalist:116687								Ceratostoma foliatum							Animalia	Mollusca	Gastropoda	Neogastropoda	Muricidae	Ceratostoma	foliatum		species		(Gmelin, 1791)
	imerss.org:PMLS:4440			Count: few		Charlie Gibbs								PRESENT				Amphissa columbiana					iNaturalist:117643								Amphissa columbiana							Animalia	Mollusca	Gastropoda	Neogastropoda	Columbellidae	Amphissa	columbiana		species		Dall, 1916
	imerss.org:PMLS:4441			Count: few		Charlie Gibbs								PRESENT				Paciocinebrina lurida					iNaturalist:910800								Paciocinebrina lurida							Animalia	Mollusca	Gastropoda	Neogastropoda	Muricidae	Paciocinebrina	lurida		species		(Middendorff, 1848)
	imerss.org:PMLS:4442			Count: some		Charlie Gibbs								PRESENT				Doris montereyensis					iNaturalist:47469								Doris montereyensis							Animalia	Mollusca	Gastropoda	Nudibranchia	Dorididae	Doris	montereyensis		species		J. G. Cooper, 1863
	imerss.org:PMLS:4443			Count: few		Charlie Gibbs								PRESENT				Diaulula odonoghuei					iNaturalist:508237								Diaulula odonoghuei							Animalia	Mollusca	Gastropoda	Nudibranchia	Discodorididae	Diaulula	odonoghuei		species		(Steinberg, 1963)
	imerss.org:PMLS:4444			Count: many		Charlie Gibbs								PRESENT				Cadlina luteomarginata complex					iNaturalist:50146								Cadlina luteomarginata							Animalia	Mollusca	Gastropoda	Nudibranchia	Cadlinidae	Cadlina	luteomarginata		species		MacFarland, 1966
	imerss.org:PMLS:4445			Count: some		Charlie Gibbs								PRESENT				Acanthodoris nanaimoensis					iNaturalist:47476								Acanthodoris nanaimoensis							Animalia	Mollusca	Gastropoda	Nudibranchia	Onchidorididae	Acanthodoris	nanaimoensis		species		O'Donoghue, 1921
	imerss.org:PMLS:4446					Charlie Gibbs		1						PRESENT				Limacia cockerelli					iNaturalist:538830								Limacia cockerelli							Animalia	Mollusca	Gastropoda	Nudibranchia	Polyceridae	Limacia	cockerelli		species		(MacFarland, 1905)
	imerss.org:PMLS:4447					Charlie Gibbs		1						PRESENT				Dendronotus albus					iNaturalist:47773								Dendronotus albus							Animalia	Mollusca	Gastropoda	Nudibranchia	Dendronotidae	Dendronotus	albus		species		MacFarland, 1966
	imerss.org:PMLS:4448			Count: few		Charlie Gibbs								PRESENT				Dirona albolineata					iNaturalist:47477								Dirona albolineata							Animalia	Mollusca	Gastropoda	Nudibranchia	Dironidae	Dirona	albolineata		species		MacFarland, 1905
	imerss.org:PMLS:4449					Charlie Gibbs		1						PRESENT				Dirona pellucida					iNaturalist:50447								Dirona pellucida							Animalia	Mollusca	Gastropoda	Nudibranchia	Dironidae	Dirona	pellucida		species		Volodchenko, 1941
	imerss.org:PMLS:4450					Charlie Gibbs		1						PRESENT				Enteroctopus dofleini					iNaturalist:48863								Enteroctopus dofleini							Animalia	Mollusca	Cephalopoda	Octopoda	Enteroctopodidae	Enteroctopus	dofleini		species		(Wülker, 1910)
	imerss.org:PMLS:4516			Count: some		Charlie Gibbs								PRESENT				Tonicella lineata					iNaturalist:47425								Tonicella lineata							Animalia	Mollusca	Polyplacophora	Chitonida	Tonicellidae	Tonicella	lineata		species		(Wood, 1815)
	imerss.org:PMLS:4517			Count: some		Charlie Gibbs								PRESENT				Tonicella insignis					iNaturalist:498132								Tonicella insignis							Animalia	Mollusca	Polyplacophora	Chitonida	Tonicellidae	Tonicella	insignis		species		(Reeve, 1847)
	imerss.org:PMLS:4518			Count: some		Charlie Gibbs								PRESENT				Crassadoma gigantea					iNaturalist:54526								Crassadoma gigantea							Animalia	Mollusca	Bivalvia	Pectinida	Pectinidae	Crassadoma	gigantea		species		(J.E. Gray, 1825)
	imerss.org:PMLS:4519					Charlie Gibbs		1						PRESENT				Acmaea mitra					iNaturalist:47676								Acmaea mitra							Animalia	Mollusca	Gastropoda		Acmaeidae	Acmaea	mitra		species		Rathke, 1833
	imerss.org:PMLS:4520					Charlie Gibbs		1						PRESENT				Puncturella cucullata					iNaturalist:904312								Puncturella cucullata							Animalia	Mollusca	Gastropoda	Lepetellida	Fissurellidae	Puncturella	cucullata		species		(Gould, 1846)
	imerss.org:PMLS:4521			Count: some		Charlie Gibbs								PRESENT				Nucella lamellosa					iNaturalist:117641								Nucella lamellosa							Animalia	Mollusca	Gastropoda	Neogastropoda	Muricidae	Nucella	lamellosa		species		(Gmelin, 1791)
	imerss.org:PMLS:4522			Count: some		Charlie Gibbs								PRESENT				Ceratostoma foliatum					iNaturalist:116687								Ceratostoma foliatum							Animalia	Mollusca	Gastropoda	Neogastropoda	Muricidae	Ceratostoma	foliatum		species		(Gmelin, 1791)
	imerss.org:PMLS:4523			Count: few		Charlie Gibbs								PRESENT				Doris montereyensis					iNaturalist:47469								Doris montereyensis							Animalia	Mollusca	Gastropoda	Nudibranchia	Dorididae	Doris	montereyensis		species		J. G. Cooper, 1863
	imerss.org:PMLS:4524			Count: some		Charlie Gibbs								PRESENT				Cadlina luteomarginata complex					iNaturalist:50146								Cadlina luteomarginata							Animalia	Mollusca	Gastropoda	Nudibranchia	Cadlinidae	Cadlina	luteomarginata		species		MacFarland, 1966
	imerss.org:PMLS:4525			Count: few		Charlie Gibbs								PRESENT				Acanthodoris nanaimoensis					iNaturalist:47476								Acanthodoris nanaimoensis							Animalia	Mollusca	Gastropoda	Nudibranchia	Onchidorididae	Acanthodoris	nanaimoensis		species		O'Donoghue, 1921
	imerss.org:PMLS:4526					Charlie Gibbs		1						PRESENT				Tritonia exsulans					iNaturalist:253510								Tritonia exsulans							Animalia	Mollusca	Gastropoda	Nudibranchia	Tritoniidae	Tritonia	exsulans		species		Bergh, 1894
	imerss.org:PMLS:4527			Count: some		Charlie Gibbs								PRESENT				Himatina trophina					iNaturalist:633561								Himatina trophina							Animalia	Mollusca	Gastropoda	Nudibranchia	Coryphellidae	Himatina	trophina		species		(Bergh, 1890)
	imerss.org:PMLS:4528					Charlie Gibbs		1						PRESENT				Enteroctopus dofleini					iNaturalist:48863								Enteroctopus dofleini							Animalia	Mollusca	Cephalopoda	Octopoda	Enteroctopodidae	Enteroctopus	dofleini		species		(Wülker, 1910)
	imerss.org:PMLS:4569			Count: few		Andy Lamb								PRESENT				Tonicella lineata					iNaturalist:47425								Tonicella lineata							Animalia	Mollusca	Polyplacophora	Chitonida	Tonicellidae	Tonicella	lineata		species		(Wood, 1815)
	imerss.org:PMLS:4631			Count: few		Andy Lamb								PRESENT				Tonicella lineata					iNaturalist:47425								Tonicella lineata							Animalia	Mollusca	Polyplacophora	Chitonida	Tonicellidae	Tonicella	lineata		species		(Wood, 1815)
	imerss.org:PMLS:4632					Andy Lamb		1						PRESENT				Mopalia spectabilis					iNaturalist:364026								Mopalia spectabilis							Animalia	Mollusca	Polyplacophora	Chitonida	Mopaliidae	Mopalia	spectabilis		species		I. M. Cowan & G. M. Cowan, 1977
	imerss.org:PMLS:4633			Count: few		Andy Lamb								PRESENT				Lepidozona mertensii					iNaturalist:117621								Lepidozona mertensii							Animalia	Mollusca	Polyplacophora	Chitonida	Ischnochitonidae	Lepidozona	mertensii		species		(Middendorff, 1847)
	imerss.org:PMLS:4634			Count: few		Andy Lamb								PRESENT				Cryptochiton stelleri					iNaturalist:49053								Cryptochiton stelleri							Animalia	Mollusca	Polyplacophora	Chitonida	Acanthochitonidae	Cryptochiton	stelleri		species		(Middendorff, 1847)
	imerss.org:PMLS:4635					Andy Lamb		2						PRESENT				Chlamys hastata					iNaturalist:180013								Chlamys hastata							Animalia	Mollusca	Bivalvia	Pectinida	Pectinidae	Chlamys	hastata		species		(G. B. Sowerby II, 1842)
	imerss.org:PMLS:4636			Count: few		Andy Lamb								PRESENT				Crassadoma gigantea					iNaturalist:54526								Crassadoma gigantea							Animalia	Mollusca	Bivalvia	Pectinida	Pectinidae	Crassadoma	gigantea		species		(J.E. Gray, 1825)
	imerss.org:PMLS:4637			Count: some		Andy Lamb								PRESENT				Pododesmus macrochisma					iNaturalist:68652								Pododesmus macrochisma							Animalia	Mollusca	Bivalvia	Pectinida	Anomiidae	Pododesmus	macrochisma		species		(Deshayes, 1839)
	imerss.org:PMLS:4638					Andy Lamb		2						PRESENT				Gari californica					iNaturalist:354323								Gari californica							Animalia	Mollusca	Bivalvia	Cardiida	Psammobiidae	Gari	californica		species		(Conrad, 1849)
	imerss.org:PMLS:4639			Count: few		Andy Lamb								PRESENT				Mytilimeria nuttalli					iNaturalist:873896								Mytilimeria nuttalli							Animalia	Mollusca	Bivalvia		Lyonsiidae	Mytilimeria	nuttalli		species		Conrad, 1837
	imerss.org:PMLS:4640					Andy Lamb		2						PRESENT				Entodesma navicula					iNaturalist:339164								Entodesma navicula							Animalia	Mollusca	Bivalvia		Lyonsiidae	Entodesma	navicula		species		(Adams & Reeve, 1850)
	imerss.org:PMLS:4641					Andy Lamb		2						PRESENT				Diodora aspera					iNaturalist:64148								Diodora aspera							Animalia	Mollusca	Gastropoda	Lepetellida	Fissurellidae	Diodora	aspera		species		(Rathke, 1833)
	imerss.org:PMLS:4642			Count: few		Andy Lamb								PRESENT				Ceratostoma foliatum					iNaturalist:116687								Ceratostoma foliatum							Animalia	Mollusca	Gastropoda	Neogastropoda	Muricidae	Ceratostoma	foliatum		species		(Gmelin, 1791)
	imerss.org:PMLS:4643					Andy Lamb		1						PRESENT				Lirabuccinum dirum					iNaturalist:117642								Lirabuccinum dirum							Animalia	Mollusca	Gastropoda	Neogastropoda	Tudiclidae	Lirabuccinum	dirum		species		(Reeve, 1846)
	imerss.org:PMLS:4644			Count: few		Andy Lamb								PRESENT				Cadlina luteomarginata complex					iNaturalist:50146								Cadlina luteomarginata							Animalia	Mollusca	Gastropoda	Nudibranchia	Cadlinidae	Cadlina	luteomarginata		species		MacFarland, 1966
	imerss.org:PMLS:4645					Andy Lamb		1						PRESENT				Acanthodoris nanaimoensis					iNaturalist:47476								Acanthodoris nanaimoensis							Animalia	Mollusca	Gastropoda	Nudibranchia	Onchidorididae	Acanthodoris	nanaimoensis		species		O'Donoghue, 1921
	imerss.org:PMLS:4646					Andy Lamb		1						PRESENT				Dendronotus rufus					iNaturalist:50393								Dendronotus rufus							Animalia	Mollusca	Gastropoda	Nudibranchia	Dendronotidae	Dendronotus	rufus		species		O'Donoghue, 1921
	imerss.org:PMLS:4744			Count: very many		Andy Lamb								PRESENT				Tonicella lineata					iNaturalist:47425								Tonicella lineata							Animalia	Mollusca	Polyplacophora	Chitonida	Tonicellidae	Tonicella	lineata		species		(Wood, 1815)
	imerss.org:PMLS:4745			Count: few		Andy Lamb								PRESENT				Tonicella insignis					iNaturalist:498132								Tonicella insignis							Animalia	Mollusca	Polyplacophora	Chitonida	Tonicellidae	Tonicella	insignis		species		(Reeve, 1847)
	imerss.org:PMLS:4746					Andy Lamb		1						PRESENT				Mopalia lignosa					iNaturalist:51724								Mopalia lignosa							Animalia	Mollusca	Polyplacophora	Chitonida	Mopaliidae	Mopalia	lignosa		species		(Gould, 1846)
	imerss.org:PMLS:4747			Count: some		Andy Lamb								PRESENT				Lepidozona mertensii					iNaturalist:117621								Lepidozona mertensii							Animalia	Mollusca	Polyplacophora	Chitonida	Ischnochitonidae	Lepidozona	mertensii		species		(Middendorff, 1847)
	imerss.org:PMLS:4748					Andy Lamb		3						PRESENT				Cryptochiton stelleri					iNaturalist:49053								Cryptochiton stelleri							Animalia	Mollusca	Polyplacophora	Chitonida	Acanthochitonidae	Cryptochiton	stelleri		species		(Middendorff, 1847)
	imerss.org:PMLS:4749			Count: very many		Andy Lamb								PRESENT				Chlamys hastata					iNaturalist:180013								Chlamys hastata							Animalia	Mollusca	Bivalvia	Pectinida	Pectinidae	Chlamys	hastata		species		(G. B. Sowerby II, 1842)
	imerss.org:PMLS:4750			Count: very many		Andy Lamb								PRESENT				Crassadoma gigantea					iNaturalist:54526								Crassadoma gigantea							Animalia	Mollusca	Bivalvia	Pectinida	Pectinidae	Crassadoma	gigantea		species		(J.E. Gray, 1825)
	imerss.org:PMLS:4751			Count: few		Andy Lamb								PRESENT				Gari californica					iNaturalist:354323								Gari californica							Animalia	Mollusca	Bivalvia	Cardiida	Psammobiidae	Gari	californica		species		(Conrad, 1849)
	imerss.org:PMLS:4752			Count: very many		Andy Lamb								PRESENT				Humilaria kennerleyi					iNaturalist:873901								Humilaria kennerleyi							Animalia	Mollusca	Bivalvia	Venerida	Veneridae	Humilaria	kennerleyi		species		(Reeve, 1863)
	imerss.org:PMLS:4753			Count: some		Andy Lamb								PRESENT				Entodesma navicula					iNaturalist:339164								Entodesma navicula							Animalia	Mollusca	Bivalvia		Lyonsiidae	Entodesma	navicula		species		(Adams & Reeve, 1850)
	imerss.org:PMLS:4754			Count: many		Andy Lamb								PRESENT				Acmaea mitra					iNaturalist:47676								Acmaea mitra							Animalia	Mollusca	Gastropoda		Acmaeidae	Acmaea	mitra		species		Rathke, 1833
	imerss.org:PMLS:4755			Count: some		Andy Lamb								PRESENT				Diodora aspera					iNaturalist:64148								Diodora aspera							Animalia	Mollusca	Gastropoda	Lepetellida	Fissurellidae	Diodora	aspera		species		(Rathke, 1833)
	imerss.org:PMLS:4756			Count: few		Andy Lamb								PRESENT				Nucella lamellosa					iNaturalist:117641								Nucella lamellosa							Animalia	Mollusca	Gastropoda	Neogastropoda	Muricidae	Nucella	lamellosa		species		(Gmelin, 1791)
	imerss.org:PMLS:4757			Count: some		Andy Lamb								PRESENT				Ceratostoma foliatum					iNaturalist:116687								Ceratostoma foliatum							Animalia	Mollusca	Gastropoda	Neogastropoda	Muricidae	Ceratostoma	foliatum		species		(Gmelin, 1791)
	imerss.org:PMLS:4758					Andy Lamb		2						PRESENT				Paciocinebrina lurida					iNaturalist:910800								Paciocinebrina lurida							Animalia	Mollusca	Gastropoda	Neogastropoda	Muricidae	Paciocinebrina	lurida		species		(Middendorff, 1848)
	imerss.org:PMLS:4759			Count: many		Andy Lamb								PRESENT				Calliostoma ligatum					iNaturalist:129920								Calliostoma ligatum							Animalia	Mollusca	Gastropoda	Trochida	Calliostomatidae	Calliostoma	ligatum		species		(Gould, 1849)
	imerss.org:PMLS:4760					Andy Lamb		1						PRESENT				Gastropteron pacificum					iNaturalist:49839								Gastropteron pacificum							Animalia	Mollusca	Gastropoda	Cephalaspidea	Gastropteridae	Gastropteron	pacificum		species		Bergh, 1894
	imerss.org:PMLS:4761					Andy Lamb		1						PRESENT				Geitodoris heathi					iNaturalist:47505								Geitodoris heathi							Animalia	Mollusca	Gastropoda	Nudibranchia	Discodorididae	Geitodoris	heathi		species		(MacFarland, 1905)
	imerss.org:PMLS:4762					Andy Lamb		1						PRESENT				Diaulula odonoghuei					iNaturalist:508237								Diaulula odonoghuei							Animalia	Mollusca	Gastropoda	Nudibranchia	Discodorididae	Diaulula	odonoghuei		species		(Steinberg, 1963)
	imerss.org:PMLS:4763			Count: few		Andy Lamb								PRESENT				Cadlina luteomarginata complex					iNaturalist:50146								Cadlina luteomarginata							Animalia	Mollusca	Gastropoda	Nudibranchia	Cadlinidae	Cadlina	luteomarginata		species		MacFarland, 1966
	imerss.org:PMLS:4764					Andy Lamb		2						PRESENT				Acanthodoris hudsoni					iNaturalist:48447								Acanthodoris hudsoni							Animalia	Mollusca	Gastropoda	Nudibranchia	Onchidorididae	Acanthodoris	hudsoni		species		MacFarland, 1905
	imerss.org:PMLS:4765			Count: few		Andy Lamb								PRESENT				Acanthodoris nanaimoensis					iNaturalist:47476								Acanthodoris nanaimoensis							Animalia	Mollusca	Gastropoda	Nudibranchia	Onchidorididae	Acanthodoris	nanaimoensis		species		O'Donoghue, 1921
	imerss.org:PMLS:4766					Andy Lamb		1						PRESENT				Tritonia festiva					iNaturalist:48827								Tritonia festiva							Animalia	Mollusca	Gastropoda	Nudibranchia	Tritoniidae	Tritonia	festiva		species		(Stearns, 1873)
	imerss.org:PMLS:4767					Andy Lamb		2						PRESENT				Dendronotus rufus					iNaturalist:50393								Dendronotus rufus							Animalia	Mollusca	Gastropoda	Nudibranchia	Dendronotidae	Dendronotus	rufus		species		O'Donoghue, 1921
	imerss.org:PMLS:4768					Andy Lamb		2						PRESENT				Dirona albolineata					iNaturalist:47477								Dirona albolineata							Animalia	Mollusca	Gastropoda	Nudibranchia	Dironidae	Dirona	albolineata		species		MacFarland, 1905
	imerss.org:PMLS:4769			Count: few		Andy Lamb								PRESENT				Hermissenda crassicornis					iNaturalist:495552								Hermissenda crassicornis							Animalia	Mollusca	Gastropoda	Nudibranchia	Myrrhinidae	Hermissenda	crassicornis		species		(Eschscholtz, 1831)
	imerss.org:PMLS:4770			Count: few		Andy Lamb								PRESENT				Himatina trophina					iNaturalist:633561								Himatina trophina							Animalia	Mollusca	Gastropoda	Nudibranchia	Coryphellidae	Himatina	trophina		species		(Bergh, 1890)
	imerss.org:PMLS:4866			Count: some		Andy Lamb								PRESENT				Tonicella lineata					iNaturalist:47425								Tonicella lineata							Animalia	Mollusca	Polyplacophora	Chitonida	Tonicellidae	Tonicella	lineata		species		(Wood, 1815)
	imerss.org:PMLS:4867			Count: few		Andy Lamb								PRESENT				Lepidozona mertensii					iNaturalist:117621								Lepidozona mertensii							Animalia	Mollusca	Polyplacophora	Chitonida	Ischnochitonidae	Lepidozona	mertensii		species		(Middendorff, 1847)
	imerss.org:PMLS:4868			Count: few		Andy Lamb								PRESENT				Chlamys hastata					iNaturalist:180013								Chlamys hastata							Animalia	Mollusca	Bivalvia	Pectinida	Pectinidae	Chlamys	hastata		species		(G. B. Sowerby II, 1842)
	imerss.org:PMLS:4869			Count: few		Andy Lamb								PRESENT				Crassadoma gigantea					iNaturalist:54526								Crassadoma gigantea							Animalia	Mollusca	Bivalvia	Pectinida	Pectinidae	Crassadoma	gigantea		species		(J.E. Gray, 1825)
	imerss.org:PMLS:4870			Count: very many		Andy Lamb								PRESENT				Pododesmus macrochisma					iNaturalist:68652								Pododesmus macrochisma							Animalia	Mollusca	Bivalvia	Pectinida	Anomiidae	Pododesmus	macrochisma		species		(Deshayes, 1839)
	imerss.org:PMLS:4871			Count: few		Andy Lamb								PRESENT				Gari californica					iNaturalist:354323								Gari californica							Animalia	Mollusca	Bivalvia	Cardiida	Psammobiidae	Gari	californica		species		(Conrad, 1849)
	imerss.org:PMLS:4872					Andy Lamb		2						PRESENT				Leukoma staminea					iNaturalist:333608								Leukoma staminea							Animalia	Mollusca	Bivalvia	Venerida	Veneridae	Leukoma	staminea		species		(Conrad, 1837)
	imerss.org:PMLS:4873			Count: few		Andy Lamb								PRESENT				Mytilimeria nuttalli					iNaturalist:873896								Mytilimeria nuttalli							Animalia	Mollusca	Bivalvia		Lyonsiidae	Mytilimeria	nuttalli		species		Conrad, 1837
	imerss.org:PMLS:4874					Andy Lamb		2						PRESENT				Entodesma navicula					iNaturalist:339164								Entodesma navicula							Animalia	Mollusca	Bivalvia		Lyonsiidae	Entodesma	navicula		species		(Adams & Reeve, 1850)
	imerss.org:PMLS:4875					Andy Lamb								PRESENT				Cryptobranchia concentrica					iNaturalist:1240081								Lepeta concentrica							Animalia	Mollusca	Gastropoda		Lepetidae	Lepeta	concentrica		species		(Middendorff, 1848)
	imerss.org:PMLS:4876					Andy Lamb		1						PRESENT				Puncturella cucullata					iNaturalist:904312								Puncturella cucullata							Animalia	Mollusca	Gastropoda	Lepetellida	Fissurellidae	Puncturella	cucullata		species		(Gould, 1846)
	imerss.org:PMLS:4877			Count: few		Andy Lamb								PRESENT				Nucella lamellosa					iNaturalist:117641								Nucella lamellosa							Animalia	Mollusca	Gastropoda	Neogastropoda	Muricidae	Nucella	lamellosa		species		(Gmelin, 1791)
	imerss.org:PMLS:4878			Count: some		Andy Lamb								PRESENT				Ceratostoma foliatum					iNaturalist:116687								Ceratostoma foliatum							Animalia	Mollusca	Gastropoda	Neogastropoda	Muricidae	Ceratostoma	foliatum		species		(Gmelin, 1791)
	imerss.org:PMLS:4879			Count: some		Andy Lamb								PRESENT				Lirabuccinum dirum					iNaturalist:117642								Lirabuccinum dirum							Animalia	Mollusca	Gastropoda	Neogastropoda	Tudiclidae	Lirabuccinum	dirum		species		(Reeve, 1846)
	imerss.org:PMLS:4880			Count: few		Andy Lamb								PRESENT				Scabrotrophon maltzani					iNaturalist:500269								Scabrotrophon maltzani							Animalia	Mollusca	Gastropoda	Neogastropoda	Muricidae	Scabrotrophon	maltzani		species		(Kobelt, 1878)
	imerss.org:PMLS:4881			Count: few		Andy Lamb								PRESENT				Gastropteron pacificum					iNaturalist:49839								Gastropteron pacificum							Animalia	Mollusca	Gastropoda	Cephalaspidea	Gastropteridae	Gastropteron	pacificum		species		Bergh, 1894
	imerss.org:PMLS:4882					Andy Lamb		2						PRESENT				Peltodoris nobilis					iNaturalist:48450								Peltodoris nobilis							Animalia	Mollusca	Gastropoda	Nudibranchia	Discodorididae	Peltodoris	nobilis		species		(MacFarland, 1905)
	imerss.org:PMLS:4883			Count: few		Andy Lamb								PRESENT				Doris montereyensis					iNaturalist:47469								Doris montereyensis							Animalia	Mollusca	Gastropoda	Nudibranchia	Dorididae	Doris	montereyensis		species		J. G. Cooper, 1863
	imerss.org:PMLS:4884			Count: few		Andy Lamb								PRESENT				Doris odhneri					iNaturalist:124210								Doris odhneri							Animalia	Mollusca	Gastropoda	Nudibranchia	Dorididae	Doris	odhneri		species		MacFarland, 1966
	imerss.org:PMLS:4885					Andy Lamb		1						PRESENT				Diaulula odonoghuei					iNaturalist:508237								Diaulula odonoghuei							Animalia	Mollusca	Gastropoda	Nudibranchia	Discodorididae	Diaulula	odonoghuei		species		(Steinberg, 1963)
	imerss.org:PMLS:4886			Count: some		Andy Lamb								PRESENT				Cadlina luteomarginata complex					iNaturalist:50146								Cadlina luteomarginata							Animalia	Mollusca	Gastropoda	Nudibranchia	Cadlinidae	Cadlina	luteomarginata		species		MacFarland, 1966
	imerss.org:PMLS:4887			Count: few		Andy Lamb								PRESENT				Acanthodoris hudsoni					iNaturalist:48447								Acanthodoris hudsoni							Animalia	Mollusca	Gastropoda	Nudibranchia	Onchidorididae	Acanthodoris	hudsoni		species		MacFarland, 1905
	imerss.org:PMLS:4888			Count: few		Andy Lamb								PRESENT				Acanthodoris nanaimoensis					iNaturalist:47476								Acanthodoris nanaimoensis							Animalia	Mollusca	Gastropoda	Nudibranchia	Onchidorididae	Acanthodoris	nanaimoensis		species		O'Donoghue, 1921
	imerss.org:PMLS:4889			Count: few		Andy Lamb								PRESENT				Dirona albolineata					iNaturalist:47477								Dirona albolineata							Animalia	Mollusca	Gastropoda	Nudibranchia	Dironidae	Dirona	albolineata		species		MacFarland, 1905
	imerss.org:PMLS:4890					Andy Lamb		3						PRESENT				Dirona pellucida					iNaturalist:50447								Dirona pellucida							Animalia	Mollusca	Gastropoda	Nudibranchia	Dironidae	Dirona	pellucida		species		Volodchenko, 1941
	imerss.org:PMLS:4968			Count: many		Andy Lamb								PRESENT				Tonicella lineata					iNaturalist:47425								Tonicella lineata							Animalia	Mollusca	Polyplacophora	Chitonida	Tonicellidae	Tonicella	lineata		species		(Wood, 1815)
	imerss.org:PMLS:4969			Count: few		Andy Lamb								PRESENT				Tonicella insignis					iNaturalist:498132								Tonicella insignis							Animalia	Mollusca	Polyplacophora	Chitonida	Tonicellidae	Tonicella	insignis		species		(Reeve, 1847)
	imerss.org:PMLS:4970			Count: few		Andy Lamb								PRESENT				Lepidozona mertensii					iNaturalist:117621								Lepidozona mertensii							Animalia	Mollusca	Polyplacophora	Chitonida	Ischnochitonidae	Lepidozona	mertensii		species		(Middendorff, 1847)
	imerss.org:PMLS:4971			Count: few		Andy Lamb								PRESENT				Chlamys hastata					iNaturalist:180013								Chlamys hastata							Animalia	Mollusca	Bivalvia	Pectinida	Pectinidae	Chlamys	hastata		species		(G. B. Sowerby II, 1842)
	imerss.org:PMLS:4972			Count: some		Andy Lamb								PRESENT				Crassadoma gigantea					iNaturalist:54526								Crassadoma gigantea							Animalia	Mollusca	Bivalvia	Pectinida	Pectinidae	Crassadoma	gigantea		species		(J.E. Gray, 1825)
	imerss.org:PMLS:4973			Count: some		Andy Lamb								PRESENT				Pododesmus macrochisma					iNaturalist:68652								Pododesmus macrochisma							Animalia	Mollusca	Bivalvia	Pectinida	Anomiidae	Pododesmus	macrochisma		species		(Deshayes, 1839)
	imerss.org:PMLS:4974			Count: few		Andy Lamb								PRESENT				Gari californica					iNaturalist:354323								Gari californica							Animalia	Mollusca	Bivalvia	Cardiida	Psammobiidae	Gari	californica		species		(Conrad, 1849)
	imerss.org:PMLS:4975			Count: some		Andy Lamb								PRESENT				Acmaea mitra					iNaturalist:47676								Acmaea mitra							Animalia	Mollusca	Gastropoda		Acmaeidae	Acmaea	mitra		species		Rathke, 1833
	imerss.org:PMLS:4976					Andy Lamb		1						PRESENT				Diodora aspera					iNaturalist:64148								Diodora aspera							Animalia	Mollusca	Gastropoda	Lepetellida	Fissurellidae	Diodora	aspera		species		(Rathke, 1833)
	imerss.org:PMLS:4977					Andy Lamb		3						PRESENT				Haliotis kamtschatkana					iNaturalist:56654								Haliotis kamtschatkana							Animalia	Mollusca	Gastropoda	Lepetellida	Haliotidae	Haliotis	kamtschatkana		species		Jonas, 1845
	imerss.org:PMLS:4978			Count: few		Andy Lamb								PRESENT				Ceratostoma foliatum					iNaturalist:116687								Ceratostoma foliatum							Animalia	Mollusca	Gastropoda	Neogastropoda	Muricidae	Ceratostoma	foliatum		species		(Gmelin, 1791)
	imerss.org:PMLS:4979			Count: few		Andy Lamb								PRESENT				Calliostoma ligatum					iNaturalist:129920								Calliostoma ligatum							Animalia	Mollusca	Gastropoda	Trochida	Calliostomatidae	Calliostoma	ligatum		species		(Gould, 1849)
	imerss.org:PMLS:4980					Andy Lamb		1						PRESENT				Berthella chacei					iNaturalist:1081461								Berthella chacei							Animalia	Mollusca	Gastropoda	Pleurobranchida	Pleurobranchidae	Berthella	chacei		species		(J. Q. Burch, 1944)
	imerss.org:PMLS:4981					Andy Lamb		2						PRESENT				Peltodoris nobilis					iNaturalist:48450								Peltodoris nobilis							Animalia	Mollusca	Gastropoda	Nudibranchia	Discodorididae	Peltodoris	nobilis		species		(MacFarland, 1905)
	imerss.org:PMLS:4982			Count: few		Andy Lamb								PRESENT				Doris odhneri					iNaturalist:124210								Doris odhneri							Animalia	Mollusca	Gastropoda	Nudibranchia	Dorididae	Doris	odhneri		species		MacFarland, 1966
	imerss.org:PMLS:4983			Count: some		Andy Lamb								PRESENT				Cadlina luteomarginata complex					iNaturalist:50146								Cadlina luteomarginata							Animalia	Mollusca	Gastropoda	Nudibranchia	Cadlinidae	Cadlina	luteomarginata		species		MacFarland, 1966
	imerss.org:PMLS:4984			Count: few		Andy Lamb								PRESENT				Acanthodoris hudsoni					iNaturalist:48447								Acanthodoris hudsoni							Animalia	Mollusca	Gastropoda	Nudibranchia	Onchidorididae	Acanthodoris	hudsoni		species		MacFarland, 1905
	imerss.org:PMLS:4985			Count: few		Andy Lamb								PRESENT				Acanthodoris nanaimoensis					iNaturalist:47476								Acanthodoris nanaimoensis							Animalia	Mollusca	Gastropoda	Nudibranchia	Onchidorididae	Acanthodoris	nanaimoensis		species		O'Donoghue, 1921
	imerss.org:PMLS:4986			Count: few		Andy Lamb								PRESENT				Dirona albolineata					iNaturalist:47477								Dirona albolineata							Animalia	Mollusca	Gastropoda	Nudibranchia	Dironidae	Dirona	albolineata		species		MacFarland, 1905
	imerss.org:PMLS:4987			Count: few		Andy Lamb								PRESENT				Antiopella fusca					iNaturalist:886884								Antiopella fusca							Animalia	Mollusca	Gastropoda	Nudibranchia	Janolidae	Antiopella	fusca		species		(O'Donoghue, 1924)
	imerss.org:PMLS:4988					Andy Lamb		1						PRESENT				Enteroctopus dofleini					iNaturalist:48863								Enteroctopus dofleini							Animalia	Mollusca	Cephalopoda	Octopoda	Enteroctopodidae	Enteroctopus	dofleini		species		(Wülker, 1910)
	imerss.org:PMLS:5062			Count: many		Andy Lamb								PRESENT				Tonicella lineata					iNaturalist:47425								Tonicella lineata							Animalia	Mollusca	Polyplacophora	Chitonida	Tonicellidae	Tonicella	lineata		species		(Wood, 1815)
	imerss.org:PMLS:5063			Count: some		Andy Lamb								PRESENT				Tonicella insignis					iNaturalist:498132								Tonicella insignis							Animalia	Mollusca	Polyplacophora	Chitonida	Tonicellidae	Tonicella	insignis		species		(Reeve, 1847)
	imerss.org:PMLS:5064			Count: few		Andy Lamb								PRESENT				Lepidozona mertensii					iNaturalist:117621								Lepidozona mertensii							Animalia	Mollusca	Polyplacophora	Chitonida	Ischnochitonidae	Lepidozona	mertensii		species		(Middendorff, 1847)
	imerss.org:PMLS:5065			Count: some		Andy Lamb								PRESENT				Chlamys hastata					iNaturalist:180013								Chlamys hastata							Animalia	Mollusca	Bivalvia	Pectinida	Pectinidae	Chlamys	hastata		species		(G. B. Sowerby II, 1842)
	imerss.org:PMLS:5066			Count: some		Andy Lamb								PRESENT				Crassadoma gigantea					iNaturalist:54526								Crassadoma gigantea							Animalia	Mollusca	Bivalvia	Pectinida	Pectinidae	Crassadoma	gigantea		species		(J.E. Gray, 1825)
	imerss.org:PMLS:5067			Count: very many		Andy Lamb								PRESENT				Pododesmus macrochisma					iNaturalist:68652								Pododesmus macrochisma							Animalia	Mollusca	Bivalvia	Pectinida	Anomiidae	Pododesmus	macrochisma		species		(Deshayes, 1839)
	imerss.org:PMLS:5068			Count: some		Andy Lamb								PRESENT				Gari californica					iNaturalist:354323								Gari californica							Animalia	Mollusca	Bivalvia	Cardiida	Psammobiidae	Gari	californica		species		(Conrad, 1849)
	imerss.org:PMLS:5069			Count: some		Andy Lamb								PRESENT				Mytilimeria nuttalli					iNaturalist:873896								Mytilimeria nuttalli							Animalia	Mollusca	Bivalvia		Lyonsiidae	Mytilimeria	nuttalli		species		Conrad, 1837
	imerss.org:PMLS:5070					Andy Lamb		1						PRESENT				Entodesma navicula					iNaturalist:339164								Entodesma navicula							Animalia	Mollusca	Bivalvia		Lyonsiidae	Entodesma	navicula		species		(Adams & Reeve, 1850)
	imerss.org:PMLS:5071			Count: few		Andy Lamb								PRESENT				Puncturella cucullata					iNaturalist:904312								Puncturella cucullata							Animalia	Mollusca	Gastropoda	Lepetellida	Fissurellidae	Puncturella	cucullata		species		(Gould, 1846)
	imerss.org:PMLS:5072			Count: some		Andy Lamb								PRESENT				Nucella lamellosa					iNaturalist:117641								Nucella lamellosa							Animalia	Mollusca	Gastropoda	Neogastropoda	Muricidae	Nucella	lamellosa		species		(Gmelin, 1791)
	imerss.org:PMLS:5073			Count: some		Andy Lamb								PRESENT				Ceratostoma foliatum					iNaturalist:116687								Ceratostoma foliatum							Animalia	Mollusca	Gastropoda	Neogastropoda	Muricidae	Ceratostoma	foliatum		species		(Gmelin, 1791)
	imerss.org:PMLS:5074			Count: some		Andy Lamb								PRESENT				Lirabuccinum dirum					iNaturalist:117642								Lirabuccinum dirum							Animalia	Mollusca	Gastropoda	Neogastropoda	Tudiclidae	Lirabuccinum	dirum		species		(Reeve, 1846)
	imerss.org:PMLS:5075					Andy Lamb		2						PRESENT				Paciocinebrina lurida					iNaturalist:910800								Paciocinebrina lurida							Animalia	Mollusca	Gastropoda	Neogastropoda	Muricidae	Paciocinebrina	lurida		species		(Middendorff, 1848)
	imerss.org:PMLS:5076					Andy Lamb		3						PRESENT				Scabrotrophon maltzani					iNaturalist:500269								Scabrotrophon maltzani							Animalia	Mollusca	Gastropoda	Neogastropoda	Muricidae	Scabrotrophon	maltzani		species		(Kobelt, 1878)
	imerss.org:PMLS:5077					Andy Lamb		1						PRESENT				Peltodoris nobilis					iNaturalist:48450								Peltodoris nobilis							Animalia	Mollusca	Gastropoda	Nudibranchia	Discodorididae	Peltodoris	nobilis		species		(MacFarland, 1905)
	imerss.org:PMLS:5078					Andy Lamb		2						PRESENT				Doris montereyensis					iNaturalist:47469								Doris montereyensis							Animalia	Mollusca	Gastropoda	Nudibranchia	Dorididae	Doris	montereyensis		species		J. G. Cooper, 1863
	imerss.org:PMLS:5079			Count: few		Andy Lamb								PRESENT				Cadlina luteomarginata complex					iNaturalist:50146								Cadlina luteomarginata							Animalia	Mollusca	Gastropoda	Nudibranchia	Cadlinidae	Cadlina	luteomarginata		species		MacFarland, 1966
	imerss.org:PMLS:5080			Count: few		Andy Lamb								PRESENT				Acanthodoris hudsoni					iNaturalist:48447								Acanthodoris hudsoni							Animalia	Mollusca	Gastropoda	Nudibranchia	Onchidorididae	Acanthodoris	hudsoni		species		MacFarland, 1905
	imerss.org:PMLS:5081			Count: many		Andy Lamb								PRESENT				Acanthodoris nanaimoensis					iNaturalist:47476								Acanthodoris nanaimoensis							Animalia	Mollusca	Gastropoda	Nudibranchia	Onchidorididae	Acanthodoris	nanaimoensis		species		O'Donoghue, 1921
	imerss.org:PMLS:5082					Andy Lamb		1						PRESENT				Triopha modesta					iNaturalist:1133369								Triopha modesta							Animalia	Mollusca	Gastropoda	Nudibranchia	Polyceridae	Triopha	modesta		species		Bergh, 1880
	imerss.org:PMLS:5083			Count: many		Andy Lamb								PRESENT				Dirona albolineata					iNaturalist:47477								Dirona albolineata							Animalia	Mollusca	Gastropoda	Nudibranchia	Dironidae	Dirona	albolineata		species		MacFarland, 1905
	imerss.org:PMLS:5084			Count: some		Andy Lamb								PRESENT				Dirona pellucida					iNaturalist:50447								Dirona pellucida							Animalia	Mollusca	Gastropoda	Nudibranchia	Dironidae	Dirona	pellucida		species		Volodchenko, 1941
	imerss.org:PMLS:5203			Count: very many		Andy Lamb								PRESENT				Tonicella lineata					iNaturalist:47425								Tonicella lineata							Animalia	Mollusca	Polyplacophora	Chitonida	Tonicellidae	Tonicella	lineata		species		(Wood, 1815)
	imerss.org:PMLS:5204			Count: few		Andy Lamb								PRESENT				Mopalia spectabilis					iNaturalist:364026								Mopalia spectabilis							Animalia	Mollusca	Polyplacophora	Chitonida	Mopaliidae	Mopalia	spectabilis		species		I. M. Cowan & G. M. Cowan, 1977
	imerss.org:PMLS:5205			Count: few		Andy Lamb								PRESENT				Lepidozona mertensii					iNaturalist:117621								Lepidozona mertensii							Animalia	Mollusca	Polyplacophora	Chitonida	Ischnochitonidae	Lepidozona	mertensii		species		(Middendorff, 1847)
	imerss.org:PMLS:5206			Count: some		Andy Lamb								PRESENT				Cryptochiton stelleri					iNaturalist:49053								Cryptochiton stelleri							Animalia	Mollusca	Polyplacophora	Chitonida	Acanthochitonidae	Cryptochiton	stelleri		species		(Middendorff, 1847)
	imerss.org:PMLS:5207			Count: few		Andy Lamb								PRESENT				Mytilus edulis complex					iNaturalist:1108240								Mytilus edulis							Animalia	Mollusca	Bivalvia	Mytilida	Mytilidae	Mytilus	edulis		species
	imerss.org:PMLS:5208			Count: some		Andy Lamb								PRESENT				Chlamys hastata					iNaturalist:180013								Chlamys hastata							Animalia	Mollusca	Bivalvia	Pectinida	Pectinidae	Chlamys	hastata		species		(G. B. Sowerby II, 1842)
	imerss.org:PMLS:5209			Count: abundant		Andy Lamb								PRESENT				Crassadoma gigantea					iNaturalist:54526								Crassadoma gigantea							Animalia	Mollusca	Bivalvia	Pectinida	Pectinidae	Crassadoma	gigantea		species		(J.E. Gray, 1825)
	imerss.org:PMLS:5210			Count: some		Andy Lamb								PRESENT				Pododesmus macrochisma					iNaturalist:68652								Pododesmus macrochisma							Animalia	Mollusca	Bivalvia	Pectinida	Anomiidae	Pododesmus	macrochisma		species		(Deshayes, 1839)
	imerss.org:PMLS:5211			Count: few		Andy Lamb								PRESENT				Tresus nuttallii					iNaturalist:117611								Tresus nuttallii							Animalia	Mollusca	Bivalvia	Venerida	Mactridae	Tresus	nuttallii		species		(Conrad, 1837)
	imerss.org:PMLS:5212			Count: few		Andy Lamb								PRESENT				Gari californica					iNaturalist:354323								Gari californica							Animalia	Mollusca	Bivalvia	Cardiida	Psammobiidae	Gari	californica		species		(Conrad, 1849)
	imerss.org:PMLS:5213			Count: some		Andy Lamb								PRESENT				Humilaria kennerleyi					iNaturalist:873901								Humilaria kennerleyi							Animalia	Mollusca	Bivalvia	Venerida	Veneridae	Humilaria	kennerleyi		species		(Reeve, 1863)
	imerss.org:PMLS:5214			Count: few		Andy Lamb								PRESENT				Entodesma navicula					iNaturalist:339164								Entodesma navicula							Animalia	Mollusca	Bivalvia		Lyonsiidae	Entodesma	navicula		species		(Adams & Reeve, 1850)
	imerss.org:PMLS:5215			Count: very many		Andy Lamb								PRESENT				Diodora aspera					iNaturalist:64148								Diodora aspera							Animalia	Mollusca	Gastropoda	Lepetellida	Fissurellidae	Diodora	aspera		species		(Rathke, 1833)
	imerss.org:PMLS:5216			Count: few		Andy Lamb								PRESENT				Crepidula norrisiarum					iNaturalist:485954								Crepidula norrisiarum							Animalia	Mollusca	Gastropoda	Littorinimorpha	Calyptraeidae	Crepidula	norrisiarum		species		Williamson, 1905
	imerss.org:PMLS:5217			Count: some		Andy Lamb								PRESENT				Ceratostoma foliatum					iNaturalist:116687								Ceratostoma foliatum							Animalia	Mollusca	Gastropoda	Neogastropoda	Muricidae	Ceratostoma	foliatum		species		(Gmelin, 1791)
	imerss.org:PMLS:5218					Andy Lamb		2						PRESENT				Paciocinebrina lurida					iNaturalist:910800								Paciocinebrina lurida							Animalia	Mollusca	Gastropoda	Neogastropoda	Muricidae	Paciocinebrina	lurida		species		(Middendorff, 1848)
	imerss.org:PMLS:5219			Count: many		Andy Lamb								PRESENT				Calliostoma ligatum					iNaturalist:129920								Calliostoma ligatum							Animalia	Mollusca	Gastropoda	Trochida	Calliostomatidae	Calliostoma	ligatum		species		(Gould, 1849)
	imerss.org:PMLS:5220					Andy Lamb		1						PRESENT				Peltodoris nobilis					iNaturalist:48450								Peltodoris nobilis							Animalia	Mollusca	Gastropoda	Nudibranchia	Discodorididae	Peltodoris	nobilis		species		(MacFarland, 1905)
	imerss.org:PMLS:5221					Andy Lamb		3						PRESENT				Doris montereyensis					iNaturalist:47469								Doris montereyensis							Animalia	Mollusca	Gastropoda	Nudibranchia	Dorididae	Doris	montereyensis		species		J. G. Cooper, 1863
	imerss.org:PMLS:5222			Count: few		Andy Lamb								PRESENT				Cadlina luteomarginata complex					iNaturalist:50146								Cadlina luteomarginata							Animalia	Mollusca	Gastropoda	Nudibranchia	Cadlinidae	Cadlina	luteomarginata		species		MacFarland, 1966
	imerss.org:PMLS:5223			Count: few		Andy Lamb								PRESENT				Acanthodoris hudsoni					iNaturalist:48447								Acanthodoris hudsoni							Animalia	Mollusca	Gastropoda	Nudibranchia	Onchidorididae	Acanthodoris	hudsoni		species		MacFarland, 1905
	imerss.org:PMLS:5224			Count: some		Andy Lamb								PRESENT				Acanthodoris nanaimoensis					iNaturalist:47476								Acanthodoris nanaimoensis							Animalia	Mollusca	Gastropoda	Nudibranchia	Onchidorididae	Acanthodoris	nanaimoensis		species		O'Donoghue, 1921
	imerss.org:PMLS:5225			Count: many		Andy Lamb								PRESENT				Dirona albolineata					iNaturalist:47477								Dirona albolineata							Animalia	Mollusca	Gastropoda	Nudibranchia	Dironidae	Dirona	albolineata		species		MacFarland, 1905
	imerss.org:PMLS:5226					Andy Lamb		2						PRESENT				Dirona pellucida					iNaturalist:50447								Dirona pellucida							Animalia	Mollusca	Gastropoda	Nudibranchia	Dironidae	Dirona	pellucida		species		Volodchenko, 1941
	imerss.org:PMLS:5227			Count: many		Andy Lamb								PRESENT				Orienthella trilineata					iNaturalist:764704								Orienthella trilineata							Animalia	Mollusca	Gastropoda	Nudibranchia	Coryphellidae	Orienthella	trilineata		species		(O'Donoghue, 1921)
	imerss.org:PMLS:5301			Count: few		Andy Lamb								PRESENT				Chlamys hastata					iNaturalist:180013								Chlamys hastata							Animalia	Mollusca	Bivalvia	Pectinida	Pectinidae	Chlamys	hastata		species		(G. B. Sowerby II, 1842)
	imerss.org:PMLS:5302			Count: very many		Andy Lamb								PRESENT				Crassadoma gigantea					iNaturalist:54526								Crassadoma gigantea							Animalia	Mollusca	Bivalvia	Pectinida	Pectinidae	Crassadoma	gigantea		species		(J.E. Gray, 1825)
	imerss.org:PMLS:5303			Count: some		Andy Lamb								PRESENT				Pododesmus macrochisma					iNaturalist:68652								Pododesmus macrochisma							Animalia	Mollusca	Bivalvia	Pectinida	Anomiidae	Pododesmus	macrochisma		species		(Deshayes, 1839)
	imerss.org:PMLS:5304			Count: some		Andy Lamb								PRESENT				Tresus sp.					iNaturalist:117624								Tresus							Animalia	Mollusca	Bivalvia	Venerida	Mactridae	Tresus			genus
	imerss.org:PMLS:5305			Count: few		Andy Lamb								PRESENT				Solen sicarius					iNaturalist:54529								Solen sicarius							Animalia	Mollusca	Bivalvia	Adapedonta	Solenidae	Solen	sicarius		species		Gould, 1850
	imerss.org:PMLS:5306			Count: few		Andy Lamb								PRESENT				Leukoma staminea					iNaturalist:333608								Leukoma staminea							Animalia	Mollusca	Bivalvia	Venerida	Veneridae	Leukoma	staminea		species		(Conrad, 1837)
	imerss.org:PMLS:5307			Count: few		Andy Lamb								PRESENT				Ceratostoma foliatum					iNaturalist:116687								Ceratostoma foliatum							Animalia	Mollusca	Gastropoda	Neogastropoda	Muricidae	Ceratostoma	foliatum		species		(Gmelin, 1791)
	imerss.org:PMLS:5308			Count: few		Andy Lamb								PRESENT				Neverita lewisii					iNaturalist:447427								Neverita lewisii							Animalia	Mollusca	Gastropoda	Littorinimorpha	Naticidae	Neverita	lewisii		species		(Gould, 1847)
	imerss.org:PMLS:5309					Andy Lamb		1						PRESENT				Doris montereyensis					iNaturalist:47469								Doris montereyensis							Animalia	Mollusca	Gastropoda	Nudibranchia	Dorididae	Doris	montereyensis		species		J. G. Cooper, 1863
	imerss.org:PMLS:5310					Andy Lamb		1						PRESENT				Diaulula odonoghuei					iNaturalist:508237								Diaulula odonoghuei							Animalia	Mollusca	Gastropoda	Nudibranchia	Discodorididae	Diaulula	odonoghuei		species		(Steinberg, 1963)
	imerss.org:PMLS:5311			Count: very many		Andy Lamb								PRESENT				Cadlina luteomarginata complex					iNaturalist:50146								Cadlina luteomarginata							Animalia	Mollusca	Gastropoda	Nudibranchia	Cadlinidae	Cadlina	luteomarginata		species		MacFarland, 1966
	imerss.org:PMLS:5312			Count: few		Andy Lamb								PRESENT				Acanthodoris hudsoni					iNaturalist:48447								Acanthodoris hudsoni							Animalia	Mollusca	Gastropoda	Nudibranchia	Onchidorididae	Acanthodoris	hudsoni		species		MacFarland, 1905
	imerss.org:PMLS:5313					Andy Lamb		1						PRESENT				Triopha modesta					iNaturalist:1133369								Triopha modesta							Animalia	Mollusca	Gastropoda	Nudibranchia	Polyceridae	Triopha	modesta		species		Bergh, 1880
	imerss.org:PMLS:5314			Count: few		Andy Lamb								PRESENT				Dendronotus iris					iNaturalist:47706								Dendronotus iris							Animalia	Mollusca	Gastropoda	Nudibranchia	Dendronotidae	Dendronotus	iris		species		J. G. Cooper, 1863
	imerss.org:PMLS:5315					Andy Lamb		1						PRESENT				Dendronotus albus					iNaturalist:47773								Dendronotus albus							Animalia	Mollusca	Gastropoda	Nudibranchia	Dendronotidae	Dendronotus	albus		species		MacFarland, 1966
	imerss.org:PMLS:5316			Count: few		Andy Lamb								PRESENT				Dirona albolineata					iNaturalist:47477								Dirona albolineata							Animalia	Mollusca	Gastropoda	Nudibranchia	Dironidae	Dirona	albolineata		species		MacFarland, 1905
	imerss.org:PMLS:5390			Count: some		Andy Lamb								PRESENT				Chlamys hastata					iNaturalist:180013								Chlamys hastata							Animalia	Mollusca	Bivalvia	Pectinida	Pectinidae	Chlamys	hastata		species		(G. B. Sowerby II, 1842)
	imerss.org:PMLS:5391					Andy Lamb		2						PRESENT				Chlamys rubida					iNaturalist:84496								Chlamys rubida							Animalia	Mollusca	Bivalvia	Pectinida	Pectinidae	Chlamys	rubida		species		(Hinds, 1845)
	imerss.org:PMLS:5392			Count: very many		Andy Lamb								PRESENT				Crassadoma gigantea					iNaturalist:54526								Crassadoma gigantea							Animalia	Mollusca	Bivalvia	Pectinida	Pectinidae	Crassadoma	gigantea		species		(J.E. Gray, 1825)
	imerss.org:PMLS:5393			Count: few		Andy Lamb								PRESENT				Gari californica					iNaturalist:354323								Gari californica							Animalia	Mollusca	Bivalvia	Cardiida	Psammobiidae	Gari	californica		species		(Conrad, 1849)
	imerss.org:PMLS:5394			Count: few		Andy Lamb								PRESENT				Leukoma staminea					iNaturalist:333608								Leukoma staminea							Animalia	Mollusca	Bivalvia	Venerida	Veneridae	Leukoma	staminea		species		(Conrad, 1837)
	imerss.org:PMLS:5395			Count: few		Andy Lamb								PRESENT				Lottia scutum					iNaturalist:129962								Lottia scutum							Animalia	Mollusca	Gastropoda		Lottiidae	Lottia	scutum		species		(Rathke, 1833)
	imerss.org:PMLS:5396					Andy Lamb		1						PRESENT				Haliotis kamtschatkana					iNaturalist:56654								Haliotis kamtschatkana							Animalia	Mollusca	Gastropoda	Lepetellida	Haliotidae	Haliotis	kamtschatkana		species		Jonas, 1845
	imerss.org:PMLS:5397			Count: few		Andy Lamb								PRESENT				Ceratostoma foliatum					iNaturalist:116687								Ceratostoma foliatum							Animalia	Mollusca	Gastropoda	Neogastropoda	Muricidae	Ceratostoma	foliatum		species		(Gmelin, 1791)
	imerss.org:PMLS:5398					Andy Lamb		1						PRESENT				Scabrotrophon maltzani					iNaturalist:500269								Scabrotrophon maltzani							Animalia	Mollusca	Gastropoda	Neogastropoda	Muricidae	Scabrotrophon	maltzani		species		(Kobelt, 1878)
	imerss.org:PMLS:5399			Count: few		Andy Lamb								PRESENT				Calliostoma ligatum					iNaturalist:129920								Calliostoma ligatum							Animalia	Mollusca	Gastropoda	Trochida	Calliostomatidae	Calliostoma	ligatum		species		(Gould, 1849)
	imerss.org:PMLS:5400			Count: few		Andy Lamb								PRESENT				Trichotropis cancellata					iNaturalist:447177								Trichotropis cancellata							Animalia	Mollusca	Gastropoda	Littorinimorpha	Capulidae	Trichotropis	cancellata		species		Hinds, 1843
	imerss.org:PMLS:5401			Count: few		Andy Lamb								PRESENT				Diaulula lentiginosa					iNaturalist:568137								Peltodoris lentiginosa							Animalia	Mollusca	Gastropoda	Nudibranchia	Discodorididae	Peltodoris	lentiginosa		species		(Millen, 1982)
	imerss.org:PMLS:5402					Andy Lamb		1						PRESENT				Doris odhneri					iNaturalist:124210								Doris odhneri							Animalia	Mollusca	Gastropoda	Nudibranchia	Dorididae	Doris	odhneri		species		MacFarland, 1966
	imerss.org:PMLS:5403					Andy Lamb		2						PRESENT				Diaulula odonoghuei					iNaturalist:508237								Diaulula odonoghuei							Animalia	Mollusca	Gastropoda	Nudibranchia	Discodorididae	Diaulula	odonoghuei		species		(Steinberg, 1963)
	imerss.org:PMLS:5404			Count: very many		Andy Lamb								PRESENT				Cadlina luteomarginata complex					iNaturalist:50146								Cadlina luteomarginata							Animalia	Mollusca	Gastropoda	Nudibranchia	Cadlinidae	Cadlina	luteomarginata		species		MacFarland, 1966
	imerss.org:PMLS:5405			Count: few		Andy Lamb								PRESENT				Acanthodoris hudsoni					iNaturalist:48447								Acanthodoris hudsoni							Animalia	Mollusca	Gastropoda	Nudibranchia	Onchidorididae	Acanthodoris	hudsoni		species		MacFarland, 1905
	imerss.org:PMLS:5406			Count: few		Andy Lamb								PRESENT				Dirona albolineata					iNaturalist:47477								Dirona albolineata							Animalia	Mollusca	Gastropoda	Nudibranchia	Dironidae	Dirona	albolineata		species		MacFarland, 1905
	imerss.org:PMLS:5407					Andy Lamb		1						PRESENT				Dirona pellucida					iNaturalist:50447								Dirona pellucida							Animalia	Mollusca	Gastropoda	Nudibranchia	Dironidae	Dirona	pellucida		species		Volodchenko, 1941
	imerss.org:PMLS:5408			Count: few		Andy Lamb								PRESENT				Coryphella verrucosa					iNaturalist:633193								Coryphella verrucosa							Animalia	Mollusca	Gastropoda	Nudibranchia	Coryphellidae	Coryphella	verrucosa		species		(M. Sars, 1829)
	imerss.org:PMLS:5409			Count: few		Andy Lamb								PRESENT				Orienthella trilineata					iNaturalist:764704								Orienthella trilineata							Animalia	Mollusca	Gastropoda	Nudibranchia	Coryphellidae	Orienthella	trilineata		species		(O'Donoghue, 1921)
	imerss.org:PMLS:5493			Count: very many		Andy Lamb								PRESENT				Tonicella lineata					iNaturalist:47425								Tonicella lineata							Animalia	Mollusca	Polyplacophora	Chitonida	Tonicellidae	Tonicella	lineata		species		(Wood, 1815)
	imerss.org:PMLS:5494			Count: some		Andy Lamb								PRESENT				Tonicella insignis					iNaturalist:498132								Tonicella insignis							Animalia	Mollusca	Polyplacophora	Chitonida	Tonicellidae	Tonicella	insignis		species		(Reeve, 1847)
	imerss.org:PMLS:5495					Andy Lamb		1						PRESENT				Mopalia hindsii					iNaturalist:51725								Mopalia hindsii							Animalia	Mollusca	Polyplacophora	Chitonida	Mopaliidae	Mopalia	hindsii		species		(Reeve, 1847)
	imerss.org:PMLS:5496			Count: few		Andy Lamb								PRESENT				Lepidozona mertensii					iNaturalist:117621								Lepidozona mertensii							Animalia	Mollusca	Polyplacophora	Chitonida	Ischnochitonidae	Lepidozona	mertensii		species		(Middendorff, 1847)
	imerss.org:PMLS:5497			Count: some		Andy Lamb								PRESENT				Chlamys hastata					iNaturalist:180013								Chlamys hastata							Animalia	Mollusca	Bivalvia	Pectinida	Pectinidae	Chlamys	hastata		species		(G. B. Sowerby II, 1842)
	imerss.org:PMLS:5498			Count: many		Andy Lamb								PRESENT				Crassadoma gigantea					iNaturalist:54526								Crassadoma gigantea							Animalia	Mollusca	Bivalvia	Pectinida	Pectinidae	Crassadoma	gigantea		species		(J.E. Gray, 1825)
	imerss.org:PMLS:5499			Count: few		Andy Lamb								PRESENT				Pododesmus macrochisma					iNaturalist:68652								Pododesmus macrochisma							Animalia	Mollusca	Bivalvia	Pectinida	Anomiidae	Pododesmus	macrochisma		species		(Deshayes, 1839)
	imerss.org:PMLS:5500			Count: few		Andy Lamb								PRESENT				Gari californica					iNaturalist:354323								Gari californica							Animalia	Mollusca	Bivalvia	Cardiida	Psammobiidae	Gari	californica		species		(Conrad, 1849)
	imerss.org:PMLS:5501			Count: many		Andy Lamb								PRESENT				Acmaea mitra					iNaturalist:47676								Acmaea mitra							Animalia	Mollusca	Gastropoda		Acmaeidae	Acmaea	mitra		species		Rathke, 1833
	imerss.org:PMLS:5502					Andy Lamb		1						PRESENT				Haliotis kamtschatkana					iNaturalist:56654								Haliotis kamtschatkana							Animalia	Mollusca	Gastropoda	Lepetellida	Haliotidae	Haliotis	kamtschatkana		species		Jonas, 1845
	imerss.org:PMLS:5503			Count: some		Andy Lamb								PRESENT				Nucella lamellosa					iNaturalist:117641								Nucella lamellosa							Animalia	Mollusca	Gastropoda	Neogastropoda	Muricidae	Nucella	lamellosa		species		(Gmelin, 1791)
	imerss.org:PMLS:5504			Count: few		Andy Lamb								PRESENT				Ceratostoma foliatum					iNaturalist:116687								Ceratostoma foliatum							Animalia	Mollusca	Gastropoda	Neogastropoda	Muricidae	Ceratostoma	foliatum		species		(Gmelin, 1791)
	imerss.org:PMLS:5505			Count: some		Andy Lamb								PRESENT				Vermetus compactus					iNaturalist:883089								Petaloconchus compactus							Animalia	Mollusca	Gastropoda	Littorinimorpha	Vermetidae	Petaloconchus	compactus		species
	imerss.org:PMLS:5506			Count: some		Andy Lamb								PRESENT				Cadlina luteomarginata complex					iNaturalist:50146								Cadlina luteomarginata							Animalia	Mollusca	Gastropoda	Nudibranchia	Cadlinidae	Cadlina	luteomarginata		species		MacFarland, 1966
	imerss.org:PMLS:5507			Count: few		Andy Lamb								PRESENT				Dirona albolineata					iNaturalist:47477								Dirona albolineata							Animalia	Mollusca	Gastropoda	Nudibranchia	Dironidae	Dirona	albolineata		species		MacFarland, 1905
	imerss.org:PMLS:5578			Count: very many		Andy Lamb								PRESENT				Tonicella lineata					iNaturalist:47425								Tonicella lineata							Animalia	Mollusca	Polyplacophora	Chitonida	Tonicellidae	Tonicella	lineata		species		(Wood, 1815)
	imerss.org:PMLS:5579					Andy Lamb		1						PRESENT				Lepidozona mertensii					iNaturalist:117621								Lepidozona mertensii							Animalia	Mollusca	Polyplacophora	Chitonida	Ischnochitonidae	Lepidozona	mertensii		species		(Middendorff, 1847)
	imerss.org:PMLS:5580					Andy Lamb		1						PRESENT				Cryptochiton stelleri					iNaturalist:49053								Cryptochiton stelleri							Animalia	Mollusca	Polyplacophora	Chitonida	Acanthochitonidae	Cryptochiton	stelleri		species		(Middendorff, 1847)
	imerss.org:PMLS:5581					Andy Lamb		2						PRESENT				Chlamys hastata					iNaturalist:180013								Chlamys hastata							Animalia	Mollusca	Bivalvia	Pectinida	Pectinidae	Chlamys	hastata		species		(G. B. Sowerby II, 1842)
	imerss.org:PMLS:5582			Count: many		Andy Lamb								PRESENT				Crassadoma gigantea					iNaturalist:54526								Crassadoma gigantea							Animalia	Mollusca	Bivalvia	Pectinida	Pectinidae	Crassadoma	gigantea		species		(J.E. Gray, 1825)
	imerss.org:PMLS:5583			Count: some		Andy Lamb								PRESENT				Pododesmus macrochisma					iNaturalist:68652								Pododesmus macrochisma							Animalia	Mollusca	Bivalvia	Pectinida	Anomiidae	Pododesmus	macrochisma		species		(Deshayes, 1839)
	imerss.org:PMLS:5584			Count: few		Andy Lamb								PRESENT				Gari californica					iNaturalist:354323								Gari californica							Animalia	Mollusca	Bivalvia	Cardiida	Psammobiidae	Gari	californica		species		(Conrad, 1849)
	imerss.org:PMLS:5585					Andy Lamb		1						PRESENT				Leukoma staminea					iNaturalist:333608								Leukoma staminea							Animalia	Mollusca	Bivalvia	Venerida	Veneridae	Leukoma	staminea		species		(Conrad, 1837)
	imerss.org:PMLS:5586			Count: some		Andy Lamb								PRESENT				Humilaria kennerleyi					iNaturalist:873901								Humilaria kennerleyi							Animalia	Mollusca	Bivalvia	Venerida	Veneridae	Humilaria	kennerleyi		species		(Reeve, 1863)
	imerss.org:PMLS:5587					Andy Lamb		1						PRESENT				Haliotis kamtschatkana					iNaturalist:56654								Haliotis kamtschatkana							Animalia	Mollusca	Gastropoda	Lepetellida	Haliotidae	Haliotis	kamtschatkana		species		Jonas, 1845
	imerss.org:PMLS:5588			Count: some		Andy Lamb								PRESENT				Nucella lamellosa					iNaturalist:117641								Nucella lamellosa							Animalia	Mollusca	Gastropoda	Neogastropoda	Muricidae	Nucella	lamellosa		species		(Gmelin, 1791)
	imerss.org:PMLS:5589			Count: many		Andy Lamb								PRESENT				Ceratostoma foliatum					iNaturalist:116687								Ceratostoma foliatum							Animalia	Mollusca	Gastropoda	Neogastropoda	Muricidae	Ceratostoma	foliatum		species		(Gmelin, 1791)
	imerss.org:PMLS:5590					Andy Lamb		1						PRESENT				Lirabuccinum dirum					iNaturalist:117642								Lirabuccinum dirum							Animalia	Mollusca	Gastropoda	Neogastropoda	Tudiclidae	Lirabuccinum	dirum		species		(Reeve, 1846)
	imerss.org:PMLS:5591					Andy Lamb		1						PRESENT				Peltodoris nobilis					iNaturalist:48450								Peltodoris nobilis							Animalia	Mollusca	Gastropoda	Nudibranchia	Discodorididae	Peltodoris	nobilis		species		(MacFarland, 1905)
	imerss.org:PMLS:5592					Andy Lamb		1						PRESENT				Diaulula odonoghuei					iNaturalist:508237								Diaulula odonoghuei							Animalia	Mollusca	Gastropoda	Nudibranchia	Discodorididae	Diaulula	odonoghuei		species		(Steinberg, 1963)
	imerss.org:PMLS:5593			Count: some		Andy Lamb								PRESENT				Cadlina luteomarginata complex					iNaturalist:50146								Cadlina luteomarginata							Animalia	Mollusca	Gastropoda	Nudibranchia	Cadlinidae	Cadlina	luteomarginata		species		MacFarland, 1966
	imerss.org:PMLS:5594					Andy Lamb		2						PRESENT				Acanthodoris nanaimoensis					iNaturalist:47476								Acanthodoris nanaimoensis							Animalia	Mollusca	Gastropoda	Nudibranchia	Onchidorididae	Acanthodoris	nanaimoensis		species		O'Donoghue, 1921
	imerss.org:PMLS:5595					Andy Lamb		1						PRESENT				Dirona albolineata					iNaturalist:47477								Dirona albolineata							Animalia	Mollusca	Gastropoda	Nudibranchia	Dironidae	Dirona	albolineata		species		MacFarland, 1905
	imerss.org:PMLS:5667			Count: some		Andy Lamb								PRESENT				Tonicella lineata					iNaturalist:47425								Tonicella lineata							Animalia	Mollusca	Polyplacophora	Chitonida	Tonicellidae	Tonicella	lineata		species		(Wood, 1815)
	imerss.org:PMLS:5668					Andy Lamb		2						PRESENT				Tonicella insignis					iNaturalist:498132								Tonicella insignis							Animalia	Mollusca	Polyplacophora	Chitonida	Tonicellidae	Tonicella	insignis		species		(Reeve, 1847)
	imerss.org:PMLS:5669					Andy Lamb		3						PRESENT				Lepidozona mertensii					iNaturalist:117621								Lepidozona mertensii							Animalia	Mollusca	Polyplacophora	Chitonida	Ischnochitonidae	Lepidozona	mertensii		species		(Middendorff, 1847)
	imerss.org:PMLS:5670					Andy Lamb		2						PRESENT				Cryptochiton stelleri					iNaturalist:49053								Cryptochiton stelleri							Animalia	Mollusca	Polyplacophora	Chitonida	Acanthochitonidae	Cryptochiton	stelleri		species		(Middendorff, 1847)
	imerss.org:PMLS:5671			Count: few		Andy Lamb								PRESENT				Chlamys hastata					iNaturalist:180013								Chlamys hastata							Animalia	Mollusca	Bivalvia	Pectinida	Pectinidae	Chlamys	hastata		species		(G. B. Sowerby II, 1842)
	imerss.org:PMLS:5672			Count: very many		Andy Lamb								PRESENT				Crassadoma gigantea					iNaturalist:54526								Crassadoma gigantea							Animalia	Mollusca	Bivalvia	Pectinida	Pectinidae	Crassadoma	gigantea		species		(J.E. Gray, 1825)
	imerss.org:PMLS:5673			Count: very many		Andy Lamb								PRESENT				Pododesmus macrochisma					iNaturalist:68652								Pododesmus macrochisma							Animalia	Mollusca	Bivalvia	Pectinida	Anomiidae	Pododesmus	macrochisma		species		(Deshayes, 1839)
	imerss.org:PMLS:5674					Andy Lamb		3						PRESENT				Entodesma navicula					iNaturalist:339164								Entodesma navicula							Animalia	Mollusca	Bivalvia		Lyonsiidae	Entodesma	navicula		species		(Adams & Reeve, 1850)
	imerss.org:PMLS:5675			Count: many		Andy Lamb								PRESENT				Nucella lamellosa					iNaturalist:117641								Nucella lamellosa							Animalia	Mollusca	Gastropoda	Neogastropoda	Muricidae	Nucella	lamellosa		species		(Gmelin, 1791)
	imerss.org:PMLS:5676			Count: few		Andy Lamb								PRESENT				Ceratostoma foliatum					iNaturalist:116687								Ceratostoma foliatum							Animalia	Mollusca	Gastropoda	Neogastropoda	Muricidae	Ceratostoma	foliatum		species		(Gmelin, 1791)
	imerss.org:PMLS:5677					Andy Lamb		2						PRESENT				Calliostoma ligatum					iNaturalist:129920								Calliostoma ligatum							Animalia	Mollusca	Gastropoda	Trochida	Calliostomatidae	Calliostoma	ligatum		species		(Gould, 1849)
	imerss.org:PMLS:5678					Andy Lamb		3						PRESENT				Diaulula odonoghuei					iNaturalist:508237								Diaulula odonoghuei							Animalia	Mollusca	Gastropoda	Nudibranchia	Discodorididae	Diaulula	odonoghuei		species		(Steinberg, 1963)
	imerss.org:PMLS:5679			Count: few		Andy Lamb								PRESENT				Cadlina luteomarginata complex					iNaturalist:50146								Cadlina luteomarginata							Animalia	Mollusca	Gastropoda	Nudibranchia	Cadlinidae	Cadlina	luteomarginata		species		MacFarland, 1966
	imerss.org:PMLS:5680					Andy Lamb		3						PRESENT				Acanthodoris hudsoni					iNaturalist:48447								Acanthodoris hudsoni							Animalia	Mollusca	Gastropoda	Nudibranchia	Onchidorididae	Acanthodoris	hudsoni		species		MacFarland, 1905
	imerss.org:PMLS:5681					Andy Lamb		2						PRESENT				Dendronotus rufus					iNaturalist:50393								Dendronotus rufus							Animalia	Mollusca	Gastropoda	Nudibranchia	Dendronotidae	Dendronotus	rufus		species		O'Donoghue, 1921
	imerss.org:PMLS:5767			Count: many		Andy Lamb								PRESENT				Tonicella lineata					iNaturalist:47425								Tonicella lineata							Animalia	Mollusca	Polyplacophora	Chitonida	Tonicellidae	Tonicella	lineata		species		(Wood, 1815)
	imerss.org:PMLS:5768			Count: few		Andy Lamb								PRESENT				Lepidozona mertensii					iNaturalist:117621								Lepidozona mertensii							Animalia	Mollusca	Polyplacophora	Chitonida	Ischnochitonidae	Lepidozona	mertensii		species		(Middendorff, 1847)
	imerss.org:PMLS:5769			Count: few		Andy Lamb								PRESENT				Chlamys hastata					iNaturalist:180013								Chlamys hastata							Animalia	Mollusca	Bivalvia	Pectinida	Pectinidae	Chlamys	hastata		species		(G. B. Sowerby II, 1842)
	imerss.org:PMLS:5770			Count: very many		Andy Lamb								PRESENT				Crassadoma gigantea					iNaturalist:54526								Crassadoma gigantea							Animalia	Mollusca	Bivalvia	Pectinida	Pectinidae	Crassadoma	gigantea		species		(J.E. Gray, 1825)
	imerss.org:PMLS:5771			Count: very many		Andy Lamb								PRESENT				Pododesmus macrochisma					iNaturalist:68652								Pododesmus macrochisma							Animalia	Mollusca	Bivalvia	Pectinida	Anomiidae	Pododesmus	macrochisma		species		(Deshayes, 1839)
	imerss.org:PMLS:5772			Count: few		Andy Lamb								PRESENT				Humilaria kennerleyi					iNaturalist:873901								Humilaria kennerleyi							Animalia	Mollusca	Bivalvia	Venerida	Veneridae	Humilaria	kennerleyi		species		(Reeve, 1863)
	imerss.org:PMLS:5773			Count: few		Andy Lamb								PRESENT				Mytilimeria nuttalli					iNaturalist:873896								Mytilimeria nuttalli							Animalia	Mollusca	Bivalvia		Lyonsiidae	Mytilimeria	nuttalli		species		Conrad, 1837
	imerss.org:PMLS:5774					Andy Lamb		1						PRESENT				Haliotis kamtschatkana					iNaturalist:56654								Haliotis kamtschatkana							Animalia	Mollusca	Gastropoda	Lepetellida	Haliotidae	Haliotis	kamtschatkana		species		Jonas, 1845
	imerss.org:PMLS:5775			Count: some		Andy Lamb								PRESENT				Nucella lamellosa					iNaturalist:117641								Nucella lamellosa							Animalia	Mollusca	Gastropoda	Neogastropoda	Muricidae	Nucella	lamellosa		species		(Gmelin, 1791)
	imerss.org:PMLS:5776			Count: few		Andy Lamb								PRESENT				Amphissa columbiana					iNaturalist:117643								Amphissa columbiana							Animalia	Mollusca	Gastropoda	Neogastropoda	Columbellidae	Amphissa	columbiana		species		Dall, 1916
	imerss.org:PMLS:5777			Count: some		Andy Lamb								PRESENT				Calliostoma ligatum					iNaturalist:129920								Calliostoma ligatum							Animalia	Mollusca	Gastropoda	Trochida	Calliostomatidae	Calliostoma	ligatum		species		(Gould, 1849)
	imerss.org:PMLS:5778			Count: few		Andy Lamb								PRESENT				Neverita lewisii					iNaturalist:447427								Neverita lewisii							Animalia	Mollusca	Gastropoda	Littorinimorpha	Naticidae	Neverita	lewisii		species		(Gould, 1847)
	imerss.org:PMLS:5779			Count: few		Andy Lamb								PRESENT				Peltodoris nobilis					iNaturalist:48450								Peltodoris nobilis							Animalia	Mollusca	Gastropoda	Nudibranchia	Discodorididae	Peltodoris	nobilis		species		(MacFarland, 1905)
	imerss.org:PMLS:5780			Count: few		Andy Lamb								PRESENT				Acanthodoris nanaimoensis					iNaturalist:47476								Acanthodoris nanaimoensis							Animalia	Mollusca	Gastropoda	Nudibranchia	Onchidorididae	Acanthodoris	nanaimoensis		species		O'Donoghue, 1921
	imerss.org:PMLS:5781					Andy Lamb		1						PRESENT				Dendronotus sp.					iNaturalist:47707								Dendronotus							Animalia	Mollusca	Gastropoda	Nudibranchia	Dendronotidae	Dendronotus			genus
	imerss.org:PMLS:5782			Count: few		Andy Lamb								PRESENT				Antiopella fusca					iNaturalist:886884								Antiopella fusca							Animalia	Mollusca	Gastropoda	Nudibranchia	Janolidae	Antiopella	fusca		species		(O'Donoghue, 1924)
	imerss.org:PMLS:5783					Andy Lamb		1						PRESENT				Enteroctopus dofleini					iNaturalist:48863								Enteroctopus dofleini							Animalia	Mollusca	Cephalopoda	Octopoda	Enteroctopodidae	Enteroctopus	dofleini		species		(Wülker, 1910)
	imerss.org:PMLS:5865			Count: some		Andy Lamb								PRESENT				Tonicella lineata					iNaturalist:47425								Tonicella lineata							Animalia	Mollusca	Polyplacophora	Chitonida	Tonicellidae	Tonicella	lineata		species		(Wood, 1815)
	imerss.org:PMLS:5866			Count: few		Andy Lamb								PRESENT				Mopalia lignosa					iNaturalist:51724								Mopalia lignosa							Animalia	Mollusca	Polyplacophora	Chitonida	Mopaliidae	Mopalia	lignosa		species		(Gould, 1846)
	imerss.org:PMLS:5867			Count: few		Andy Lamb								PRESENT				Mopalia vespertina					iNaturalist:364027								Mopalia vespertina							Animalia	Mollusca	Polyplacophora	Chitonida	Mopaliidae	Mopalia	vespertina		species		(Gould, 1852)
	imerss.org:PMLS:5868			Count: few		Andy Lamb								PRESENT				Lepidozona mertensii					iNaturalist:117621								Lepidozona mertensii							Animalia	Mollusca	Polyplacophora	Chitonida	Ischnochitonidae	Lepidozona	mertensii		species		(Middendorff, 1847)
	imerss.org:PMLS:5869			Count: some		Andy Lamb								PRESENT				Lepidozona trifida					iNaturalist:1174737								Tripoplax trifida							Animalia	Mollusca	Polyplacophora	Chitonida	Ischnochitonidae	Tripoplax	trifida		species		(Carpenter, 1864)
	imerss.org:PMLS:5870			Count: few		Andy Lamb								PRESENT				Cryptochiton stelleri					iNaturalist:49053								Cryptochiton stelleri							Animalia	Mollusca	Polyplacophora	Chitonida	Acanthochitonidae	Cryptochiton	stelleri		species		(Middendorff, 1847)
	imerss.org:PMLS:5871			Count: some		Andy Lamb								PRESENT				Chlamys hastata					iNaturalist:180013								Chlamys hastata							Animalia	Mollusca	Bivalvia	Pectinida	Pectinidae	Chlamys	hastata		species		(G. B. Sowerby II, 1842)
	imerss.org:PMLS:5872			Count: very many		Andy Lamb								PRESENT				Crassadoma gigantea					iNaturalist:54526								Crassadoma gigantea							Animalia	Mollusca	Bivalvia	Pectinida	Pectinidae	Crassadoma	gigantea		species		(J.E. Gray, 1825)
	imerss.org:PMLS:5873			Count: very many		Andy Lamb								PRESENT				Pododesmus macrochisma					iNaturalist:68652								Pododesmus macrochisma							Animalia	Mollusca	Bivalvia	Pectinida	Anomiidae	Pododesmus	macrochisma		species		(Deshayes, 1839)
	imerss.org:PMLS:5874			Count: some		Andy Lamb								PRESENT				Mytilimeria nuttalli					iNaturalist:873896								Mytilimeria nuttalli							Animalia	Mollusca	Bivalvia		Lyonsiidae	Mytilimeria	nuttalli		species		Conrad, 1837
	imerss.org:PMLS:5875			Count: few		Andy Lamb								PRESENT				Entodesma navicula					iNaturalist:339164								Entodesma navicula							Animalia	Mollusca	Bivalvia		Lyonsiidae	Entodesma	navicula		species		(Adams & Reeve, 1850)
	imerss.org:PMLS:5876					Andy Lamb		2						PRESENT				Diodora aspera					iNaturalist:64148								Diodora aspera							Animalia	Mollusca	Gastropoda	Lepetellida	Fissurellidae	Diodora	aspera		species		(Rathke, 1833)
	imerss.org:PMLS:5877			Count: some		Andy Lamb								PRESENT				Nucella lamellosa					iNaturalist:117641								Nucella lamellosa							Animalia	Mollusca	Gastropoda	Neogastropoda	Muricidae	Nucella	lamellosa		species		(Gmelin, 1791)
	imerss.org:PMLS:5878			Count: some		Andy Lamb								PRESENT				Ceratostoma foliatum					iNaturalist:116687								Ceratostoma foliatum							Animalia	Mollusca	Gastropoda	Neogastropoda	Muricidae	Ceratostoma	foliatum		species		(Gmelin, 1791)
	imerss.org:PMLS:5879					Andy Lamb		2						PRESENT				Scabrotrophon maltzani					iNaturalist:500269								Scabrotrophon maltzani							Animalia	Mollusca	Gastropoda	Neogastropoda	Muricidae	Scabrotrophon	maltzani		species		(Kobelt, 1878)
	imerss.org:PMLS:5880			Count: few		Andy Lamb								PRESENT				Calliostoma ligatum					iNaturalist:129920								Calliostoma ligatum							Animalia	Mollusca	Gastropoda	Trochida	Calliostomatidae	Calliostoma	ligatum		species		(Gould, 1849)
	imerss.org:PMLS:5881			Count: few		Andy Lamb								PRESENT				Peltodoris nobilis					iNaturalist:48450								Peltodoris nobilis							Animalia	Mollusca	Gastropoda	Nudibranchia	Discodorididae	Peltodoris	nobilis		species		(MacFarland, 1905)
	imerss.org:PMLS:5882			Count: few		Andy Lamb								PRESENT				Diaulula lentiginosa					iNaturalist:568137								Peltodoris lentiginosa							Animalia	Mollusca	Gastropoda	Nudibranchia	Discodorididae	Peltodoris	lentiginosa		species		(Millen, 1982)
	imerss.org:PMLS:5883			Count: few		Andy Lamb								PRESENT				Doris montereyensis					iNaturalist:47469								Doris montereyensis							Animalia	Mollusca	Gastropoda	Nudibranchia	Dorididae	Doris	montereyensis		species		J. G. Cooper, 1863
	imerss.org:PMLS:5884			Count: few		Andy Lamb								PRESENT				Doris odhneri					iNaturalist:124210								Doris odhneri							Animalia	Mollusca	Gastropoda	Nudibranchia	Dorididae	Doris	odhneri		species		MacFarland, 1966
	imerss.org:PMLS:5885			Count: few		Andy Lamb								PRESENT				Diaulula odonoghuei					iNaturalist:508237								Diaulula odonoghuei							Animalia	Mollusca	Gastropoda	Nudibranchia	Discodorididae	Diaulula	odonoghuei		species		(Steinberg, 1963)
	imerss.org:PMLS:5886			Count: few		Andy Lamb								PRESENT				Cadlina luteomarginata complex					iNaturalist:50146								Cadlina luteomarginata							Animalia	Mollusca	Gastropoda	Nudibranchia	Cadlinidae	Cadlina	luteomarginata		species		MacFarland, 1966
	imerss.org:PMLS:5887			Count: few		Andy Lamb								PRESENT				Acanthodoris nanaimoensis					iNaturalist:47476								Acanthodoris nanaimoensis							Animalia	Mollusca	Gastropoda	Nudibranchia	Onchidorididae	Acanthodoris	nanaimoensis		species		O'Donoghue, 1921
	imerss.org:PMLS:5888					Andy Lamb		2						PRESENT				Limacia cockerelli					iNaturalist:538830								Limacia cockerelli							Animalia	Mollusca	Gastropoda	Nudibranchia	Polyceridae	Limacia	cockerelli		species		(MacFarland, 1905)
	imerss.org:PMLS:5889					Andy Lamb		2						PRESENT				Dendronotus rufus					iNaturalist:50393								Dendronotus rufus							Animalia	Mollusca	Gastropoda	Nudibranchia	Dendronotidae	Dendronotus	rufus		species		O'Donoghue, 1921
	imerss.org:PMLS:5890					Andy Lamb		1						PRESENT				Dendronotus sp.					iNaturalist:47707								Dendronotus							Animalia	Mollusca	Gastropoda	Nudibranchia	Dendronotidae	Dendronotus			genus
	imerss.org:PMLS:5891			Count: few		Andy Lamb								PRESENT				Dirona albolineata					iNaturalist:47477								Dirona albolineata							Animalia	Mollusca	Gastropoda	Nudibranchia	Dironidae	Dirona	albolineata		species		MacFarland, 1905
	imerss.org:PMLS:5892			Count: few		Andy Lamb								PRESENT				Orienthella trilineata					iNaturalist:764704								Orienthella trilineata							Animalia	Mollusca	Gastropoda	Nudibranchia	Coryphellidae	Orienthella	trilineata		species		(O'Donoghue, 1921)
	imerss.org:PMLS:5995			Count: some		Andy Lamb								PRESENT				Tonicella lineata					iNaturalist:47425								Tonicella lineata							Animalia	Mollusca	Polyplacophora	Chitonida	Tonicellidae	Tonicella	lineata		species		(Wood, 1815)
	imerss.org:PMLS:5996			Count: few		Andy Lamb								PRESENT				Mopalia swanii					iNaturalist:339904								Mopalia swanii							Animalia	Mollusca	Polyplacophora	Chitonida	Mopaliidae	Mopalia	swanii		species		Carpenter, 1864
	imerss.org:PMLS:5997			Count: some		Andy Lamb								PRESENT				Mytilus edulis complex					iNaturalist:1108240								Mytilus edulis							Animalia	Mollusca	Bivalvia	Mytilida	Mytilidae	Mytilus	edulis		species
	imerss.org:PMLS:5998			Count: some		Andy Lamb								PRESENT				Chlamys hastata					iNaturalist:180013								Chlamys hastata							Animalia	Mollusca	Bivalvia	Pectinida	Pectinidae	Chlamys	hastata		species		(G. B. Sowerby II, 1842)
	imerss.org:PMLS:5999			Count: very many		Andy Lamb								PRESENT				Crassadoma gigantea					iNaturalist:54526								Crassadoma gigantea							Animalia	Mollusca	Bivalvia	Pectinida	Pectinidae	Crassadoma	gigantea		species		(J.E. Gray, 1825)
	imerss.org:PMLS:6000			Count: many		Andy Lamb								PRESENT				Mytilimeria nuttalli					iNaturalist:873896								Mytilimeria nuttalli							Animalia	Mollusca	Bivalvia		Lyonsiidae	Mytilimeria	nuttalli		species		Conrad, 1837
	imerss.org:PMLS:6001			Count: some		Andy Lamb								PRESENT				Entodesma navicula					iNaturalist:339164								Entodesma navicula							Animalia	Mollusca	Bivalvia		Lyonsiidae	Entodesma	navicula		species		(Adams & Reeve, 1850)
	imerss.org:PMLS:6002			Count: few		Andy Lamb								PRESENT				Crepidula norrisiarum					iNaturalist:485954								Crepidula norrisiarum							Animalia	Mollusca	Gastropoda	Littorinimorpha	Calyptraeidae	Crepidula	norrisiarum		species		Williamson, 1905
	imerss.org:PMLS:6003			Count: very many		Andy Lamb								PRESENT				Nucella ostrina					iNaturalist:122704								Nucella ostrina							Animalia	Mollusca	Gastropoda	Neogastropoda	Muricidae	Nucella	ostrina		species		(Gould, 1852)
	imerss.org:PMLS:6004			Count: some		Andy Lamb								PRESENT				Ceratostoma foliatum					iNaturalist:116687								Ceratostoma foliatum							Animalia	Mollusca	Gastropoda	Neogastropoda	Muricidae	Ceratostoma	foliatum		species		(Gmelin, 1791)
	imerss.org:PMLS:6005			Count: some		Andy Lamb								PRESENT				Amphissa columbiana					iNaturalist:117643								Amphissa columbiana							Animalia	Mollusca	Gastropoda	Neogastropoda	Columbellidae	Amphissa	columbiana		species		Dall, 1916
	imerss.org:PMLS:6006			Count: few		Andy Lamb								PRESENT				Paciocinebrina lurida					iNaturalist:910800								Paciocinebrina lurida							Animalia	Mollusca	Gastropoda	Neogastropoda	Muricidae	Paciocinebrina	lurida		species		(Middendorff, 1848)
	imerss.org:PMLS:6007			Count: few		Andy Lamb								PRESENT				Calliostoma ligatum					iNaturalist:129920								Calliostoma ligatum							Animalia	Mollusca	Gastropoda	Trochida	Calliostomatidae	Calliostoma	ligatum		species		(Gould, 1849)
	imerss.org:PMLS:6008			Count: few		Andy Lamb								PRESENT				Neverita lewisii					iNaturalist:447427								Neverita lewisii							Animalia	Mollusca	Gastropoda	Littorinimorpha	Naticidae	Neverita	lewisii		species		(Gould, 1847)
	imerss.org:PMLS:6009			Count: many		Andy Lamb								PRESENT				Doris montereyensis					iNaturalist:47469								Doris montereyensis							Animalia	Mollusca	Gastropoda	Nudibranchia	Dorididae	Doris	montereyensis		species		J. G. Cooper, 1863
	imerss.org:PMLS:6010			Count: few		Andy Lamb								PRESENT				Diaulula odonoghuei					iNaturalist:508237								Diaulula odonoghuei							Animalia	Mollusca	Gastropoda	Nudibranchia	Discodorididae	Diaulula	odonoghuei		species		(Steinberg, 1963)
	imerss.org:PMLS:6011			Count: few		Andy Lamb								PRESENT				Cadlina luteomarginata complex					iNaturalist:50146								Cadlina luteomarginata							Animalia	Mollusca	Gastropoda	Nudibranchia	Cadlinidae	Cadlina	luteomarginata		species		MacFarland, 1966
	imerss.org:PMLS:6012			Count: very many		Andy Lamb								PRESENT				Orienthella trilineata					iNaturalist:764704								Orienthella trilineata							Animalia	Mollusca	Gastropoda	Nudibranchia	Coryphellidae	Orienthella	trilineata		species		(O'Donoghue, 1921)
	imerss.org:PMLS:6096			Count: very many		Andy Lamb								PRESENT				Tonicella lineata					iNaturalist:47425								Tonicella lineata							Animalia	Mollusca	Polyplacophora	Chitonida	Tonicellidae	Tonicella	lineata		species		(Wood, 1815)
	imerss.org:PMLS:6097			Count: some		Andy Lamb								PRESENT				Mopalia swanii					iNaturalist:339904								Mopalia swanii							Animalia	Mollusca	Polyplacophora	Chitonida	Mopaliidae	Mopalia	swanii		species		Carpenter, 1864
	imerss.org:PMLS:6098			Count: some		Andy Lamb								PRESENT				Lepidozona mertensii					iNaturalist:117621								Lepidozona mertensii							Animalia	Mollusca	Polyplacophora	Chitonida	Ischnochitonidae	Lepidozona	mertensii		species		(Middendorff, 1847)
	imerss.org:PMLS:6099			Count: few		Andy Lamb								PRESENT				Cryptochiton stelleri					iNaturalist:49053								Cryptochiton stelleri							Animalia	Mollusca	Polyplacophora	Chitonida	Acanthochitonidae	Cryptochiton	stelleri		species		(Middendorff, 1847)
	imerss.org:PMLS:6100			Count: some		Andy Lamb								PRESENT				Mytilus edulis complex					iNaturalist:1108240								Mytilus edulis							Animalia	Mollusca	Bivalvia	Mytilida	Mytilidae	Mytilus	edulis		species
	imerss.org:PMLS:6101			Count: many		Andy Lamb								PRESENT				Chlamys hastata					iNaturalist:180013								Chlamys hastata							Animalia	Mollusca	Bivalvia	Pectinida	Pectinidae	Chlamys	hastata		species		(G. B. Sowerby II, 1842)
	imerss.org:PMLS:6102			Count: abundant		Andy Lamb								PRESENT				Crassadoma gigantea					iNaturalist:54526								Crassadoma gigantea							Animalia	Mollusca	Bivalvia	Pectinida	Pectinidae	Crassadoma	gigantea		species		(J.E. Gray, 1825)
	imerss.org:PMLS:6103			Count: very many		Andy Lamb								PRESENT				Pododesmus macrochisma					iNaturalist:68652								Pododesmus macrochisma							Animalia	Mollusca	Bivalvia	Pectinida	Anomiidae	Pododesmus	macrochisma		species		(Deshayes, 1839)
	imerss.org:PMLS:6104			Count: some		Andy Lamb								PRESENT				Gari californica					iNaturalist:354323								Gari californica							Animalia	Mollusca	Bivalvia	Cardiida	Psammobiidae	Gari	californica		species		(Conrad, 1849)
	imerss.org:PMLS:6105			Count: few		Andy Lamb								PRESENT				Mytilimeria nuttalli					iNaturalist:873896								Mytilimeria nuttalli							Animalia	Mollusca	Bivalvia		Lyonsiidae	Mytilimeria	nuttalli		species		Conrad, 1837
	imerss.org:PMLS:6106			Count: few		Andy Lamb								PRESENT				Entodesma navicula					iNaturalist:339164								Entodesma navicula							Animalia	Mollusca	Bivalvia		Lyonsiidae	Entodesma	navicula		species		(Adams & Reeve, 1850)
	imerss.org:PMLS:6107			Count: very many		Andy Lamb								PRESENT				Diodora aspera					iNaturalist:64148								Diodora aspera							Animalia	Mollusca	Gastropoda	Lepetellida	Fissurellidae	Diodora	aspera		species		(Rathke, 1833)
	imerss.org:PMLS:6108			Count: abundant		Andy Lamb								PRESENT				Nucella ostrina					iNaturalist:122704								Nucella ostrina							Animalia	Mollusca	Gastropoda	Neogastropoda	Muricidae	Nucella	ostrina		species		(Gould, 1852)
	imerss.org:PMLS:6109			Count: some		Andy Lamb								PRESENT				Ceratostoma foliatum					iNaturalist:116687								Ceratostoma foliatum							Animalia	Mollusca	Gastropoda	Neogastropoda	Muricidae	Ceratostoma	foliatum		species		(Gmelin, 1791)
	imerss.org:PMLS:6110			Count: some		Andy Lamb								PRESENT				Amphissa columbiana					iNaturalist:117643								Amphissa columbiana							Animalia	Mollusca	Gastropoda	Neogastropoda	Columbellidae	Amphissa	columbiana		species		Dall, 1916
	imerss.org:PMLS:6111			Count: few		Andy Lamb								PRESENT				Paciocinebrina lurida					iNaturalist:910800								Paciocinebrina lurida							Animalia	Mollusca	Gastropoda	Neogastropoda	Muricidae	Paciocinebrina	lurida		species		(Middendorff, 1848)
	imerss.org:PMLS:6112			Count: few		Andy Lamb								PRESENT				Scabrotrophon maltzani					iNaturalist:500269								Scabrotrophon maltzani							Animalia	Mollusca	Gastropoda	Neogastropoda	Muricidae	Scabrotrophon	maltzani		species		(Kobelt, 1878)
	imerss.org:PMLS:6113			Count: abundant		Andy Lamb								PRESENT				Calliostoma ligatum					iNaturalist:129920								Calliostoma ligatum							Animalia	Mollusca	Gastropoda	Trochida	Calliostomatidae	Calliostoma	ligatum		species		(Gould, 1849)
	imerss.org:PMLS:6114			Count: few		Andy Lamb								PRESENT				Peltodoris nobilis					iNaturalist:48450								Peltodoris nobilis							Animalia	Mollusca	Gastropoda	Nudibranchia	Discodorididae	Peltodoris	nobilis		species		(MacFarland, 1905)
	imerss.org:PMLS:6115			Count: very many		Andy Lamb								PRESENT				Doris montereyensis					iNaturalist:47469								Doris montereyensis							Animalia	Mollusca	Gastropoda	Nudibranchia	Dorididae	Doris	montereyensis		species		J. G. Cooper, 1863
	imerss.org:PMLS:6116			Count: some		Andy Lamb								PRESENT				Diaulula odonoghuei					iNaturalist:508237								Diaulula odonoghuei							Animalia	Mollusca	Gastropoda	Nudibranchia	Discodorididae	Diaulula	odonoghuei		species		(Steinberg, 1963)
	imerss.org:PMLS:6117			Count: few		Andy Lamb								PRESENT				Cadlina luteomarginata complex					iNaturalist:50146								Cadlina luteomarginata							Animalia	Mollusca	Gastropoda	Nudibranchia	Cadlinidae	Cadlina	luteomarginata		species		MacFarland, 1966
	imerss.org:PMLS:6118			Count: few		Andy Lamb								PRESENT				Acanthodoris nanaimoensis					iNaturalist:47476								Acanthodoris nanaimoensis							Animalia	Mollusca	Gastropoda	Nudibranchia	Onchidorididae	Acanthodoris	nanaimoensis		species		O'Donoghue, 1921
	imerss.org:PMLS:6119			Count: few		Andy Lamb								PRESENT				Hermissenda crassicornis					iNaturalist:495552								Hermissenda crassicornis							Animalia	Mollusca	Gastropoda	Nudibranchia	Myrrhinidae	Hermissenda	crassicornis		species		(Eschscholtz, 1831)
	imerss.org:PMLS:6120			Count: very many		Andy Lamb								PRESENT				Orienthella trilineata					iNaturalist:764704								Orienthella trilineata							Animalia	Mollusca	Gastropoda	Nudibranchia	Coryphellidae	Orienthella	trilineata		species		(O'Donoghue, 1921)
	imerss.org:PMLS:6214			Count: very many		Andy Lamb								PRESENT				Tonicella lineata					iNaturalist:47425								Tonicella lineata							Animalia	Mollusca	Polyplacophora	Chitonida	Tonicellidae	Tonicella	lineata		species		(Wood, 1815)
	imerss.org:PMLS:6215			Count: few		Andy Lamb								PRESENT				Tonicella insignis					iNaturalist:498132								Tonicella insignis							Animalia	Mollusca	Polyplacophora	Chitonida	Tonicellidae	Tonicella	insignis		species		(Reeve, 1847)
	imerss.org:PMLS:6216			Count: few		Andy Lamb								PRESENT				Mopalia vespertina					iNaturalist:364027								Mopalia vespertina							Animalia	Mollusca	Polyplacophora	Chitonida	Mopaliidae	Mopalia	vespertina		species		(Gould, 1852)
	imerss.org:PMLS:6217			Count: few		Andy Lamb								PRESENT				Lepidozona mertensii					iNaturalist:117621								Lepidozona mertensii							Animalia	Mollusca	Polyplacophora	Chitonida	Ischnochitonidae	Lepidozona	mertensii		species		(Middendorff, 1847)
	imerss.org:PMLS:6218					Andy Lamb		2						PRESENT				Cryptochiton stelleri					iNaturalist:49053								Cryptochiton stelleri							Animalia	Mollusca	Polyplacophora	Chitonida	Acanthochitonidae	Cryptochiton	stelleri		species		(Middendorff, 1847)
	imerss.org:PMLS:6219			Count: many		Andy Lamb								PRESENT				Chlamys hastata					iNaturalist:180013								Chlamys hastata							Animalia	Mollusca	Bivalvia	Pectinida	Pectinidae	Chlamys	hastata		species		(G. B. Sowerby II, 1842)
	imerss.org:PMLS:6220			Count: very many		Andy Lamb								PRESENT				Crassadoma gigantea					iNaturalist:54526								Crassadoma gigantea							Animalia	Mollusca	Bivalvia	Pectinida	Pectinidae	Crassadoma	gigantea		species		(J.E. Gray, 1825)
	imerss.org:PMLS:6221			Count: many		Andy Lamb								PRESENT				Pododesmus macrochisma					iNaturalist:68652								Pododesmus macrochisma							Animalia	Mollusca	Bivalvia	Pectinida	Anomiidae	Pododesmus	macrochisma		species		(Deshayes, 1839)
	imerss.org:PMLS:6222					Andy Lamb		1						PRESENT				Haliotis kamtschatkana					iNaturalist:56654								Haliotis kamtschatkana							Animalia	Mollusca	Gastropoda	Lepetellida	Haliotidae	Haliotis	kamtschatkana		species		Jonas, 1845
	imerss.org:PMLS:6223			Count: many		Andy Lamb								PRESENT				Nucella lamellosa					iNaturalist:117641								Nucella lamellosa							Animalia	Mollusca	Gastropoda	Neogastropoda	Muricidae	Nucella	lamellosa		species		(Gmelin, 1791)
	imerss.org:PMLS:6224			Count: many		Andy Lamb								PRESENT				Ceratostoma foliatum					iNaturalist:116687								Ceratostoma foliatum							Animalia	Mollusca	Gastropoda	Neogastropoda	Muricidae	Ceratostoma	foliatum		species		(Gmelin, 1791)
	imerss.org:PMLS:6225			Count: few		Andy Lamb								PRESENT				Lirabuccinum dirum					iNaturalist:117642								Lirabuccinum dirum							Animalia	Mollusca	Gastropoda	Neogastropoda	Tudiclidae	Lirabuccinum	dirum		species		(Reeve, 1846)
	imerss.org:PMLS:6226			Count: some		Andy Lamb								PRESENT				Amphissa columbiana					iNaturalist:117643								Amphissa columbiana							Animalia	Mollusca	Gastropoda	Neogastropoda	Columbellidae	Amphissa	columbiana		species		Dall, 1916
	imerss.org:PMLS:6227			Count: few		Andy Lamb								PRESENT				Scabrotrophon maltzani					iNaturalist:500269								Scabrotrophon maltzani							Animalia	Mollusca	Gastropoda	Neogastropoda	Muricidae	Scabrotrophon	maltzani		species		(Kobelt, 1878)
	imerss.org:PMLS:6228			Count: some		Andy Lamb								PRESENT				Calliostoma ligatum					iNaturalist:129920								Calliostoma ligatum							Animalia	Mollusca	Gastropoda	Trochida	Calliostomatidae	Calliostoma	ligatum		species		(Gould, 1849)
	imerss.org:PMLS:6229			Count: many		Andy Lamb								PRESENT				Doris odhneri					iNaturalist:124210								Doris odhneri							Animalia	Mollusca	Gastropoda	Nudibranchia	Dorididae	Doris	odhneri		species		MacFarland, 1966
	imerss.org:PMLS:6230			Count: few		Andy Lamb								PRESENT				Diaulula odonoghuei					iNaturalist:508237								Diaulula odonoghuei							Animalia	Mollusca	Gastropoda	Nudibranchia	Discodorididae	Diaulula	odonoghuei		species		(Steinberg, 1963)
	imerss.org:PMLS:6231			Count: some		Andy Lamb								PRESENT				Cadlina luteomarginata complex					iNaturalist:50146								Cadlina luteomarginata							Animalia	Mollusca	Gastropoda	Nudibranchia	Cadlinidae	Cadlina	luteomarginata		species		MacFarland, 1966
	imerss.org:PMLS:6232			Count: few		Andy Lamb								PRESENT				Acanthodoris nanaimoensis					iNaturalist:47476								Acanthodoris nanaimoensis							Animalia	Mollusca	Gastropoda	Nudibranchia	Onchidorididae	Acanthodoris	nanaimoensis		species		O'Donoghue, 1921
	imerss.org:PMLS:6233					Andy Lamb		1						PRESENT				Tritonia festiva					iNaturalist:48827								Tritonia festiva							Animalia	Mollusca	Gastropoda	Nudibranchia	Tritoniidae	Tritonia	festiva		species		(Stearns, 1873)
	imerss.org:PMLS:6234			Count: many		Andy Lamb								PRESENT				Dirona albolineata					iNaturalist:47477								Dirona albolineata							Animalia	Mollusca	Gastropoda	Nudibranchia	Dironidae	Dirona	albolineata		species		MacFarland, 1905
	imerss.org:PMLS:6306			Count: very many		Andy Lamb								PRESENT				Tonicella lineata					iNaturalist:47425								Tonicella lineata							Animalia	Mollusca	Polyplacophora	Chitonida	Tonicellidae	Tonicella	lineata		species		(Wood, 1815)
	imerss.org:PMLS:6307			Count: some		Andy Lamb								PRESENT				Lepidozona mertensii					iNaturalist:117621								Lepidozona mertensii							Animalia	Mollusca	Polyplacophora	Chitonida	Ischnochitonidae	Lepidozona	mertensii		species		(Middendorff, 1847)
	imerss.org:PMLS:6308			Count: some		Andy Lamb								PRESENT				Chlamys hastata					iNaturalist:180013								Chlamys hastata							Animalia	Mollusca	Bivalvia	Pectinida	Pectinidae	Chlamys	hastata		species		(G. B. Sowerby II, 1842)
	imerss.org:PMLS:6309			Count: many		Andy Lamb								PRESENT				Crassadoma gigantea					iNaturalist:54526								Crassadoma gigantea							Animalia	Mollusca	Bivalvia	Pectinida	Pectinidae	Crassadoma	gigantea		species		(J.E. Gray, 1825)
	imerss.org:PMLS:6310			Count: many		Andy Lamb								PRESENT				Pododesmus macrochisma					iNaturalist:68652								Pododesmus macrochisma							Animalia	Mollusca	Bivalvia	Pectinida	Anomiidae	Pododesmus	macrochisma		species		(Deshayes, 1839)
	imerss.org:PMLS:6311			Count: few		Andy Lamb								PRESENT				Gari californica					iNaturalist:354323								Gari californica							Animalia	Mollusca	Bivalvia	Cardiida	Psammobiidae	Gari	californica		species		(Conrad, 1849)
	imerss.org:PMLS:6312			Count: few		Andy Lamb								PRESENT				Diodora aspera					iNaturalist:64148								Diodora aspera							Animalia	Mollusca	Gastropoda	Lepetellida	Fissurellidae	Diodora	aspera		species		(Rathke, 1833)
	imerss.org:PMLS:6313					Andy Lamb		1						PRESENT				Haliotis kamtschatkana					iNaturalist:56654								Haliotis kamtschatkana							Animalia	Mollusca	Gastropoda	Lepetellida	Haliotidae	Haliotis	kamtschatkana		species		Jonas, 1845
	imerss.org:PMLS:6314			Count: some		Andy Lamb								PRESENT				Ceratostoma foliatum					iNaturalist:116687								Ceratostoma foliatum							Animalia	Mollusca	Gastropoda	Neogastropoda	Muricidae	Ceratostoma	foliatum		species		(Gmelin, 1791)
	imerss.org:PMLS:6315			Count: few		Andy Lamb								PRESENT				Calliostoma ligatum					iNaturalist:129920								Calliostoma ligatum							Animalia	Mollusca	Gastropoda	Trochida	Calliostomatidae	Calliostoma	ligatum		species		(Gould, 1849)
	imerss.org:PMLS:6316					Andy Lamb								PRESENT				Velutina velutina					iNaturalist:482347								Velutina velutina							Animalia	Mollusca	Gastropoda	Littorinimorpha	Velutinidae	Velutina	velutina		species		(O. F. Müller, 1776)
	imerss.org:PMLS:6317			Count: few		Andy Lamb								PRESENT				Peltodoris nobilis					iNaturalist:48450								Peltodoris nobilis							Animalia	Mollusca	Gastropoda	Nudibranchia	Discodorididae	Peltodoris	nobilis		species		(MacFarland, 1905)
	imerss.org:PMLS:6318			Count: few		Andy Lamb								PRESENT				Cadlina luteomarginata complex					iNaturalist:50146								Cadlina luteomarginata							Animalia	Mollusca	Gastropoda	Nudibranchia	Cadlinidae	Cadlina	luteomarginata		species		MacFarland, 1966
	imerss.org:PMLS:6319			Count: few		Andy Lamb								PRESENT				Acanthodoris hudsoni					iNaturalist:48447								Acanthodoris hudsoni							Animalia	Mollusca	Gastropoda	Nudibranchia	Onchidorididae	Acanthodoris	hudsoni		species		MacFarland, 1905
	imerss.org:PMLS:6320			Count: few		Andy Lamb								PRESENT				Acanthodoris nanaimoensis					iNaturalist:47476								Acanthodoris nanaimoensis							Animalia	Mollusca	Gastropoda	Nudibranchia	Onchidorididae	Acanthodoris	nanaimoensis		species		O'Donoghue, 1921
	imerss.org:PMLS:6321			Count: few		Andy Lamb								PRESENT				Hermissenda crassicornis					iNaturalist:495552								Hermissenda crassicornis							Animalia	Mollusca	Gastropoda	Nudibranchia	Myrrhinidae	Hermissenda	crassicornis		species		(Eschscholtz, 1831)
	imerss.org:PMLS:6322					Andy Lamb		1						PRESENT				Enteroctopus dofleini					iNaturalist:48863								Enteroctopus dofleini							Animalia	Mollusca	Cephalopoda	Octopoda	Enteroctopodidae	Enteroctopus	dofleini		species		(Wülker, 1910)
	imerss.org:PMLS:6401			Count: very many		Andy Lamb								PRESENT				Tonicella lineata					iNaturalist:47425								Tonicella lineata							Animalia	Mollusca	Polyplacophora	Chitonida	Tonicellidae	Tonicella	lineata		species		(Wood, 1815)
	imerss.org:PMLS:6402			Count: few		Andy Lamb								PRESENT				Mopalia lignosa					iNaturalist:51724								Mopalia lignosa							Animalia	Mollusca	Polyplacophora	Chitonida	Mopaliidae	Mopalia	lignosa		species		(Gould, 1846)
	imerss.org:PMLS:6403			Count: few		Andy Lamb								PRESENT				Cryptochiton stelleri					iNaturalist:49053								Cryptochiton stelleri							Animalia	Mollusca	Polyplacophora	Chitonida	Acanthochitonidae	Cryptochiton	stelleri		species		(Middendorff, 1847)
	imerss.org:PMLS:6404			Count: very many		Andy Lamb								PRESENT				Chlamys hastata					iNaturalist:180013								Chlamys hastata							Animalia	Mollusca	Bivalvia	Pectinida	Pectinidae	Chlamys	hastata		species		(G. B. Sowerby II, 1842)
	imerss.org:PMLS:6405			Count: very many		Andy Lamb								PRESENT				Crassadoma gigantea					iNaturalist:54526								Crassadoma gigantea							Animalia	Mollusca	Bivalvia	Pectinida	Pectinidae	Crassadoma	gigantea		species		(J.E. Gray, 1825)
	imerss.org:PMLS:6406			Count: few		Andy Lamb								PRESENT				Bankia setacea					iNaturalist:347368								Bankia setacea							Animalia	Mollusca	Bivalvia	Myida	Teredinidae	Bankia	setacea		species		(Tryon, 1863)
	imerss.org:PMLS:6407			Count: few		Andy Lamb								PRESENT				Entodesma navicula					iNaturalist:339164								Entodesma navicula							Animalia	Mollusca	Bivalvia		Lyonsiidae	Entodesma	navicula		species		(Adams & Reeve, 1850)
	imerss.org:PMLS:6408			Count: few		Andy Lamb								PRESENT				Diodora aspera					iNaturalist:64148								Diodora aspera							Animalia	Mollusca	Gastropoda	Lepetellida	Fissurellidae	Diodora	aspera		species		(Rathke, 1833)
	imerss.org:PMLS:6409			Count: some		Andy Lamb								PRESENT				Ceratostoma foliatum					iNaturalist:116687								Ceratostoma foliatum							Animalia	Mollusca	Gastropoda	Neogastropoda	Muricidae	Ceratostoma	foliatum		species		(Gmelin, 1791)
	imerss.org:PMLS:6410			Count: few		Andy Lamb								PRESENT				Calliostoma ligatum					iNaturalist:129920								Calliostoma ligatum							Animalia	Mollusca	Gastropoda	Trochida	Calliostomatidae	Calliostoma	ligatum		species		(Gould, 1849)
	imerss.org:PMLS:6411					Andy Lamb		2						PRESENT				Diaulula lentiginosa					iNaturalist:568137								Peltodoris lentiginosa							Animalia	Mollusca	Gastropoda	Nudibranchia	Discodorididae	Peltodoris	lentiginosa		species		(Millen, 1982)
	imerss.org:PMLS:6412			Count: few		Andy Lamb								PRESENT				Doris odhneri					iNaturalist:124210								Doris odhneri							Animalia	Mollusca	Gastropoda	Nudibranchia	Dorididae	Doris	odhneri		species		MacFarland, 1966
	imerss.org:PMLS:6413			Count: few		Andy Lamb								PRESENT				Cadlina luteomarginata complex					iNaturalist:50146								Cadlina luteomarginata							Animalia	Mollusca	Gastropoda	Nudibranchia	Cadlinidae	Cadlina	luteomarginata		species		MacFarland, 1966
	imerss.org:PMLS:6414			Count: few		Andy Lamb								PRESENT				Dirona albolineata					iNaturalist:47477								Dirona albolineata							Animalia	Mollusca	Gastropoda	Nudibranchia	Dironidae	Dirona	albolineata		species		MacFarland, 1905
	imerss.org:PMLS:6499			Count: very many		Andy Lamb								PRESENT				Tonicella lineata					iNaturalist:47425								Tonicella lineata							Animalia	Mollusca	Polyplacophora	Chitonida	Tonicellidae	Tonicella	lineata		species		(Wood, 1815)
	imerss.org:PMLS:6500					Andy Lamb		2						PRESENT				Mopalia vespertina					iNaturalist:364027								Mopalia vespertina							Animalia	Mollusca	Polyplacophora	Chitonida	Mopaliidae	Mopalia	vespertina		species		(Gould, 1852)
	imerss.org:PMLS:6501			Count: some		Andy Lamb								PRESENT				Lepidozona mertensii					iNaturalist:117621								Lepidozona mertensii							Animalia	Mollusca	Polyplacophora	Chitonida	Ischnochitonidae	Lepidozona	mertensii		species		(Middendorff, 1847)
	imerss.org:PMLS:6502			Count: many		Andy Lamb								PRESENT				Cryptochiton stelleri					iNaturalist:49053								Cryptochiton stelleri							Animalia	Mollusca	Polyplacophora	Chitonida	Acanthochitonidae	Cryptochiton	stelleri		species		(Middendorff, 1847)
	imerss.org:PMLS:6503			Count: some		Andy Lamb								PRESENT				Mytilus edulis complex					iNaturalist:1108240								Mytilus edulis							Animalia	Mollusca	Bivalvia	Mytilida	Mytilidae	Mytilus	edulis		species
	imerss.org:PMLS:6504			Count: some		Andy Lamb								PRESENT				Chlamys hastata					iNaturalist:180013								Chlamys hastata							Animalia	Mollusca	Bivalvia	Pectinida	Pectinidae	Chlamys	hastata		species		(G. B. Sowerby II, 1842)
	imerss.org:PMLS:6505			Count: very many		Andy Lamb								PRESENT				Crassadoma gigantea					iNaturalist:54526								Crassadoma gigantea							Animalia	Mollusca	Bivalvia	Pectinida	Pectinidae	Crassadoma	gigantea		species		(J.E. Gray, 1825)
	imerss.org:PMLS:6506			Count: few		Andy Lamb								PRESENT				Ceratostoma foliatum					iNaturalist:116687								Ceratostoma foliatum							Animalia	Mollusca	Gastropoda	Neogastropoda	Muricidae	Ceratostoma	foliatum		species		(Gmelin, 1791)
	imerss.org:PMLS:6507					Andy Lamb		2						PRESENT				Paciocinebrina lurida					iNaturalist:910800								Paciocinebrina lurida							Animalia	Mollusca	Gastropoda	Neogastropoda	Muricidae	Paciocinebrina	lurida		species		(Middendorff, 1848)
	imerss.org:PMLS:6508			Count: some		Andy Lamb								PRESENT				Calliostoma ligatum					iNaturalist:129920								Calliostoma ligatum							Animalia	Mollusca	Gastropoda	Trochida	Calliostomatidae	Calliostoma	ligatum		species		(Gould, 1849)
	imerss.org:PMLS:6509			Count: few		Andy Lamb								PRESENT				Diaulula odonoghuei					iNaturalist:508237								Diaulula odonoghuei							Animalia	Mollusca	Gastropoda	Nudibranchia	Discodorididae	Diaulula	odonoghuei		species		(Steinberg, 1963)
	imerss.org:PMLS:6510			Count: few		Andy Lamb								PRESENT				Acanthodoris hudsoni					iNaturalist:48447								Acanthodoris hudsoni							Animalia	Mollusca	Gastropoda	Nudibranchia	Onchidorididae	Acanthodoris	hudsoni		species		MacFarland, 1905
	imerss.org:PMLS:6511			Count: some		Andy Lamb								PRESENT				Orienthella trilineata					iNaturalist:764704								Orienthella trilineata							Animalia	Mollusca	Gastropoda	Nudibranchia	Coryphellidae	Orienthella	trilineata		species		(O'Donoghue, 1921)
	imerss.org:PMLS:6575			Count: some		Andy Lamb								PRESENT				Lepidozona mertensii					iNaturalist:117621								Lepidozona mertensii							Animalia	Mollusca	Polyplacophora	Chitonida	Ischnochitonidae	Lepidozona	mertensii		species		(Middendorff, 1847)
	imerss.org:PMLS:6576			Count: few		Andy Lamb								PRESENT				Lepidozona trifida					iNaturalist:1174737								Tripoplax trifida							Animalia	Mollusca	Polyplacophora	Chitonida	Ischnochitonidae	Tripoplax	trifida		species		(Carpenter, 1864)
	imerss.org:PMLS:6577			Count: few		Andy Lamb								PRESENT				Cryptochiton stelleri					iNaturalist:49053								Cryptochiton stelleri							Animalia	Mollusca	Polyplacophora	Chitonida	Acanthochitonidae	Cryptochiton	stelleri		species		(Middendorff, 1847)
	imerss.org:PMLS:6578			Count: abundant		Andy Lamb								PRESENT				Crassadoma gigantea					iNaturalist:54526								Crassadoma gigantea							Animalia	Mollusca	Bivalvia	Pectinida	Pectinidae	Crassadoma	gigantea		species		(J.E. Gray, 1825)
	imerss.org:PMLS:6579			Count: few		Andy Lamb								PRESENT				Gari californica					iNaturalist:354323								Gari californica							Animalia	Mollusca	Bivalvia	Cardiida	Psammobiidae	Gari	californica		species		(Conrad, 1849)
	imerss.org:PMLS:6580			Count: some		Andy Lamb								PRESENT				Mytilimeria nuttalli					iNaturalist:873896								Mytilimeria nuttalli							Animalia	Mollusca	Bivalvia		Lyonsiidae	Mytilimeria	nuttalli		species		Conrad, 1837
	imerss.org:PMLS:6581			Count: few		Andy Lamb								PRESENT				Entodesma navicula					iNaturalist:339164								Entodesma navicula							Animalia	Mollusca	Bivalvia		Lyonsiidae	Entodesma	navicula		species		(Adams & Reeve, 1850)
	imerss.org:PMLS:6582			Count: few		Andy Lamb								PRESENT				Diodora aspera					iNaturalist:64148								Diodora aspera							Animalia	Mollusca	Gastropoda	Lepetellida	Fissurellidae	Diodora	aspera		species		(Rathke, 1833)
	imerss.org:PMLS:6583			Count: few		Andy Lamb								PRESENT				Nucella lamellosa					iNaturalist:117641								Nucella lamellosa							Animalia	Mollusca	Gastropoda	Neogastropoda	Muricidae	Nucella	lamellosa		species		(Gmelin, 1791)
	imerss.org:PMLS:6584			Count: few		Andy Lamb								PRESENT				Ceratostoma foliatum					iNaturalist:116687								Ceratostoma foliatum							Animalia	Mollusca	Gastropoda	Neogastropoda	Muricidae	Ceratostoma	foliatum		species		(Gmelin, 1791)
	imerss.org:PMLS:6585					Andy Lamb		1						PRESENT				Calliostoma annulatum					iNaturalist:121181								Calliostoma annulatum							Animalia	Mollusca	Gastropoda	Trochida	Calliostomatidae	Calliostoma	annulatum		species		(Lightfoot, 1786)
	imerss.org:PMLS:6586			Count: few		Andy Lamb								PRESENT				Peltodoris nobilis					iNaturalist:48450								Peltodoris nobilis							Animalia	Mollusca	Gastropoda	Nudibranchia	Discodorididae	Peltodoris	nobilis		species		(MacFarland, 1905)
	imerss.org:PMLS:6587			Count: few		Andy Lamb								PRESENT				Diaulula lentiginosa					iNaturalist:568137								Peltodoris lentiginosa							Animalia	Mollusca	Gastropoda	Nudibranchia	Discodorididae	Peltodoris	lentiginosa		species		(Millen, 1982)
	imerss.org:PMLS:6588			Count: few		Andy Lamb								PRESENT				Doris montereyensis					iNaturalist:47469								Doris montereyensis							Animalia	Mollusca	Gastropoda	Nudibranchia	Dorididae	Doris	montereyensis		species		J. G. Cooper, 1863
	imerss.org:PMLS:6589			Count: few		Andy Lamb								PRESENT				Doris odhneri					iNaturalist:124210								Doris odhneri							Animalia	Mollusca	Gastropoda	Nudibranchia	Dorididae	Doris	odhneri		species		MacFarland, 1966
	imerss.org:PMLS:6590			Count: few		Andy Lamb								PRESENT				Diaulula odonoghuei					iNaturalist:508237								Diaulula odonoghuei							Animalia	Mollusca	Gastropoda	Nudibranchia	Discodorididae	Diaulula	odonoghuei		species		(Steinberg, 1963)
	imerss.org:PMLS:6591			Count: some		Andy Lamb								PRESENT				Cadlina luteomarginata complex					iNaturalist:50146								Cadlina luteomarginata							Animalia	Mollusca	Gastropoda	Nudibranchia	Cadlinidae	Cadlina	luteomarginata		species		MacFarland, 1966
	imerss.org:PMLS:6592			Count: few		Andy Lamb								PRESENT				Dirona albolineata					iNaturalist:47477								Dirona albolineata							Animalia	Mollusca	Gastropoda	Nudibranchia	Dironidae	Dirona	albolineata		species		MacFarland, 1905
	imerss.org:PMLS:6593			Count: few		Andy Lamb								PRESENT				Hermissenda crassicornis					iNaturalist:495552								Hermissenda crassicornis							Animalia	Mollusca	Gastropoda	Nudibranchia	Myrrhinidae	Hermissenda	crassicornis		species		(Eschscholtz, 1831)
	imerss.org:PMLS:6668					Andy Lamb		2						PRESENT				Mopalia swanii					iNaturalist:339904								Mopalia swanii							Animalia	Mollusca	Polyplacophora	Chitonida	Mopaliidae	Mopalia	swanii		species		Carpenter, 1864
	imerss.org:PMLS:6669			Count: many		Andy Lamb								PRESENT				Lepidozona mertensii					iNaturalist:117621								Lepidozona mertensii							Animalia	Mollusca	Polyplacophora	Chitonida	Ischnochitonidae	Lepidozona	mertensii		species		(Middendorff, 1847)
	imerss.org:PMLS:6670			Count: many		Andy Lamb								PRESENT				Chlamys hastata					iNaturalist:180013								Chlamys hastata							Animalia	Mollusca	Bivalvia	Pectinida	Pectinidae	Chlamys	hastata		species		(G. B. Sowerby II, 1842)
	imerss.org:PMLS:6671			Count: many		Andy Lamb								PRESENT				Crassadoma gigantea					iNaturalist:54526								Crassadoma gigantea							Animalia	Mollusca	Bivalvia	Pectinida	Pectinidae	Crassadoma	gigantea		species		(J.E. Gray, 1825)
	imerss.org:PMLS:6672			Count: very many		Andy Lamb								PRESENT				Pododesmus macrochisma					iNaturalist:68652								Pododesmus macrochisma							Animalia	Mollusca	Bivalvia	Pectinida	Anomiidae	Pododesmus	macrochisma		species		(Deshayes, 1839)
	imerss.org:PMLS:6673					Andy Lamb		1						PRESENT				Diodora aspera					iNaturalist:64148								Diodora aspera							Animalia	Mollusca	Gastropoda	Lepetellida	Fissurellidae	Diodora	aspera		species		(Rathke, 1833)
	imerss.org:PMLS:6674			Count: some		Andy Lamb								PRESENT				Ceratostoma foliatum					iNaturalist:116687								Ceratostoma foliatum							Animalia	Mollusca	Gastropoda	Neogastropoda	Muricidae	Ceratostoma	foliatum		species		(Gmelin, 1791)
	imerss.org:PMLS:6675			Count: very many		Andy Lamb								PRESENT				Amphissa columbiana					iNaturalist:117643								Amphissa columbiana							Animalia	Mollusca	Gastropoda	Neogastropoda	Columbellidae	Amphissa	columbiana		species		Dall, 1916
	imerss.org:PMLS:6676			Count: very many		Andy Lamb								PRESENT				Calliostoma ligatum					iNaturalist:129920								Calliostoma ligatum							Animalia	Mollusca	Gastropoda	Trochida	Calliostomatidae	Calliostoma	ligatum		species		(Gould, 1849)
	imerss.org:PMLS:6677					Andy Lamb		2						PRESENT				Cadlina luteomarginata complex					iNaturalist:50146								Cadlina luteomarginata							Animalia	Mollusca	Gastropoda	Nudibranchia	Cadlinidae	Cadlina	luteomarginata		species		MacFarland, 1966
	imerss.org:PMLS:6678			Count: some		Andy Lamb								PRESENT				Coryphella verrucosa					iNaturalist:633193								Coryphella verrucosa							Animalia	Mollusca	Gastropoda	Nudibranchia	Coryphellidae	Coryphella	verrucosa		species		(M. Sars, 1829)
	imerss.org:PMLS:6679			Count: very many		Andy Lamb								PRESENT				Orienthella trilineata					iNaturalist:764704								Orienthella trilineata							Animalia	Mollusca	Gastropoda	Nudibranchia	Coryphellidae	Orienthella	trilineata		species		(O'Donoghue, 1921)
	imerss.org:PMLS:6768			Count: many		Andy Lamb								PRESENT				Tonicella lineata					iNaturalist:47425								Tonicella lineata							Animalia	Mollusca	Polyplacophora	Chitonida	Tonicellidae	Tonicella	lineata		species		(Wood, 1815)
	imerss.org:PMLS:6769					Andy Lamb		2						PRESENT				Mopalia hindsii					iNaturalist:51725								Mopalia hindsii							Animalia	Mollusca	Polyplacophora	Chitonida	Mopaliidae	Mopalia	hindsii		species		(Reeve, 1847)
	imerss.org:PMLS:6770			Count: few		Andy Lamb								PRESENT				Lepidozona mertensii					iNaturalist:117621								Lepidozona mertensii							Animalia	Mollusca	Polyplacophora	Chitonida	Ischnochitonidae	Lepidozona	mertensii		species		(Middendorff, 1847)
	imerss.org:PMLS:6771					Andy Lamb		1						PRESENT				Katharina tunicata					iNaturalist:47632								Katharina tunicata							Animalia	Mollusca	Polyplacophora	Chitonida	Mopaliidae	Katharina	tunicata		species		(Wood, 1815)
	imerss.org:PMLS:6772			Count: many		Andy Lamb								PRESENT				Cryptochiton stelleri					iNaturalist:49053								Cryptochiton stelleri							Animalia	Mollusca	Polyplacophora	Chitonida	Acanthochitonidae	Cryptochiton	stelleri		species		(Middendorff, 1847)
	imerss.org:PMLS:6773			Count: many		Andy Lamb								PRESENT				Chlamys hastata					iNaturalist:180013								Chlamys hastata							Animalia	Mollusca	Bivalvia	Pectinida	Pectinidae	Chlamys	hastata		species		(G. B. Sowerby II, 1842)
	imerss.org:PMLS:6774			Count: very many		Andy Lamb								PRESENT				Crassadoma gigantea					iNaturalist:54526								Crassadoma gigantea							Animalia	Mollusca	Bivalvia	Pectinida	Pectinidae	Crassadoma	gigantea		species		(J.E. Gray, 1825)
	imerss.org:PMLS:6775			Count: few		Andy Lamb								PRESENT				Nucella lamellosa					iNaturalist:117641								Nucella lamellosa							Animalia	Mollusca	Gastropoda	Neogastropoda	Muricidae	Nucella	lamellosa		species		(Gmelin, 1791)
	imerss.org:PMLS:6776			Count: many		Andy Lamb								PRESENT				Calliostoma ligatum					iNaturalist:129920								Calliostoma ligatum							Animalia	Mollusca	Gastropoda	Trochida	Calliostomatidae	Calliostoma	ligatum		species		(Gould, 1849)
	imerss.org:PMLS:6777			Count: some		Andy Lamb								PRESENT				Peltodoris nobilis					iNaturalist:48450								Peltodoris nobilis							Animalia	Mollusca	Gastropoda	Nudibranchia	Discodorididae	Peltodoris	nobilis		species		(MacFarland, 1905)
	imerss.org:PMLS:6778			Count: few		Andy Lamb								PRESENT				Geitodoris heathi					iNaturalist:47505								Geitodoris heathi							Animalia	Mollusca	Gastropoda	Nudibranchia	Discodorididae	Geitodoris	heathi		species		(MacFarland, 1905)
	imerss.org:PMLS:6779			Count: few		Andy Lamb								PRESENT				Cadlina luteomarginata complex					iNaturalist:50146								Cadlina luteomarginata							Animalia	Mollusca	Gastropoda	Nudibranchia	Cadlinidae	Cadlina	luteomarginata		species		MacFarland, 1966
	imerss.org:PMLS:6878			Count: some		Andy Lamb								PRESENT				Tonicella lineata					iNaturalist:47425								Tonicella lineata							Animalia	Mollusca	Polyplacophora	Chitonida	Tonicellidae	Tonicella	lineata		species		(Wood, 1815)
	imerss.org:PMLS:6879			Count: some		Andy Lamb								PRESENT				Tonicella insignis					iNaturalist:498132								Tonicella insignis							Animalia	Mollusca	Polyplacophora	Chitonida	Tonicellidae	Tonicella	insignis		species		(Reeve, 1847)
	imerss.org:PMLS:6880					Andy Lamb		1						PRESENT				Mopalia swanii					iNaturalist:339904								Mopalia swanii							Animalia	Mollusca	Polyplacophora	Chitonida	Mopaliidae	Mopalia	swanii		species		Carpenter, 1864
	imerss.org:PMLS:6881			Count: few		Andy Lamb								PRESENT				Lepidozona mertensii					iNaturalist:117621								Lepidozona mertensii							Animalia	Mollusca	Polyplacophora	Chitonida	Ischnochitonidae	Lepidozona	mertensii		species		(Middendorff, 1847)
	imerss.org:PMLS:6882			Count: few		Andy Lamb								PRESENT				Lepidozona trifida					iNaturalist:1174737								Tripoplax trifida							Animalia	Mollusca	Polyplacophora	Chitonida	Ischnochitonidae	Tripoplax	trifida		species		(Carpenter, 1864)
	imerss.org:PMLS:6883			Count: few		Andy Lamb								PRESENT				Cryptochiton stelleri					iNaturalist:49053								Cryptochiton stelleri							Animalia	Mollusca	Polyplacophora	Chitonida	Acanthochitonidae	Cryptochiton	stelleri		species		(Middendorff, 1847)
	imerss.org:PMLS:6884			Count: many		Andy Lamb								PRESENT				Chlamys hastata					iNaturalist:180013								Chlamys hastata							Animalia	Mollusca	Bivalvia	Pectinida	Pectinidae	Chlamys	hastata		species		(G. B. Sowerby II, 1842)
	imerss.org:PMLS:6885			Count: some		Andy Lamb								PRESENT				Crassadoma gigantea					iNaturalist:54526								Crassadoma gigantea							Animalia	Mollusca	Bivalvia	Pectinida	Pectinidae	Crassadoma	gigantea		species		(J.E. Gray, 1825)
	imerss.org:PMLS:6886			Count: some		Andy Lamb								PRESENT				Pododesmus macrochisma					iNaturalist:68652								Pododesmus macrochisma							Animalia	Mollusca	Bivalvia	Pectinida	Anomiidae	Pododesmus	macrochisma		species		(Deshayes, 1839)
	imerss.org:PMLS:6887			Count: few		Andy Lamb								PRESENT				Tresus sp.					iNaturalist:117624								Tresus							Animalia	Mollusca	Bivalvia	Venerida	Mactridae	Tresus			genus
	imerss.org:PMLS:6888			Count: few		Andy Lamb								PRESENT				Mya truncata					iNaturalist:447416								Mya truncata							Animalia	Mollusca	Bivalvia	Myida	Myidae	Mya	truncata		species		Linnaeus, 1758
	imerss.org:PMLS:6889			Count: some		Andy Lamb								PRESENT				Entodesma navicula					iNaturalist:339164								Entodesma navicula							Animalia	Mollusca	Bivalvia		Lyonsiidae	Entodesma	navicula		species		(Adams & Reeve, 1850)
	imerss.org:PMLS:6890			Count: very many		Andy Lamb								PRESENT				Nucella lamellosa					iNaturalist:117641								Nucella lamellosa							Animalia	Mollusca	Gastropoda	Neogastropoda	Muricidae	Nucella	lamellosa		species		(Gmelin, 1791)
	imerss.org:PMLS:6891			Count: very many		Andy Lamb								PRESENT				Ceratostoma foliatum					iNaturalist:116687								Ceratostoma foliatum							Animalia	Mollusca	Gastropoda	Neogastropoda	Muricidae	Ceratostoma	foliatum		species		(Gmelin, 1791)
	imerss.org:PMLS:6892			Count: few		Andy Lamb								PRESENT				Calliostoma ligatum					iNaturalist:129920								Calliostoma ligatum							Animalia	Mollusca	Gastropoda	Trochida	Calliostomatidae	Calliostoma	ligatum		species		(Gould, 1849)
	imerss.org:PMLS:6893			Count: some		Andy Lamb								PRESENT				Fusitriton oregonensis					iNaturalist:448389								Fusitriton oregonensis							Animalia	Mollusca	Gastropoda	Littorinimorpha	Cymatiidae	Fusitriton	oregonensis		species		(Redfield, 1846)
	imerss.org:PMLS:6894			Count: few		Andy Lamb								PRESENT				Peltodoris nobilis					iNaturalist:48450								Peltodoris nobilis							Animalia	Mollusca	Gastropoda	Nudibranchia	Discodorididae	Peltodoris	nobilis		species		(MacFarland, 1905)
	imerss.org:PMLS:6895					Andy Lamb		1						PRESENT				Doris odhneri					iNaturalist:124210								Doris odhneri							Animalia	Mollusca	Gastropoda	Nudibranchia	Dorididae	Doris	odhneri		species		MacFarland, 1966
	imerss.org:PMLS:6896					Andy Lamb		2						PRESENT				Diaulula odonoghuei					iNaturalist:508237								Diaulula odonoghuei							Animalia	Mollusca	Gastropoda	Nudibranchia	Discodorididae	Diaulula	odonoghuei		species		(Steinberg, 1963)
	imerss.org:PMLS:6897			Count: few		Andy Lamb								PRESENT				Cadlina luteomarginata complex					iNaturalist:50146								Cadlina luteomarginata							Animalia	Mollusca	Gastropoda	Nudibranchia	Cadlinidae	Cadlina	luteomarginata		species		MacFarland, 1966
	imerss.org:PMLS:6898					Andy Lamb		1						PRESENT				Acanthodoris hudsoni					iNaturalist:48447								Acanthodoris hudsoni							Animalia	Mollusca	Gastropoda	Nudibranchia	Onchidorididae	Acanthodoris	hudsoni		species		MacFarland, 1905
	imerss.org:PMLS:6899			Count: few		Andy Lamb								PRESENT				Triopha modesta					iNaturalist:1133369								Triopha modesta							Animalia	Mollusca	Gastropoda	Nudibranchia	Polyceridae	Triopha	modesta		species		Bergh, 1880
	imerss.org:PMLS:6900					Andy Lamb		2						PRESENT				Tritonia festiva					iNaturalist:48827								Tritonia festiva							Animalia	Mollusca	Gastropoda	Nudibranchia	Tritoniidae	Tritonia	festiva		species		(Stearns, 1873)
	imerss.org:PMLS:6901			Count: few		Andy Lamb								PRESENT				Dirona albolineata					iNaturalist:47477								Dirona albolineata							Animalia	Mollusca	Gastropoda	Nudibranchia	Dironidae	Dirona	albolineata		species		MacFarland, 1905
	imerss.org:PMLS:7006			Count: abundant		Andy Lamb								PRESENT				Tonicella lineata					iNaturalist:47425								Tonicella lineata							Animalia	Mollusca	Polyplacophora	Chitonida	Tonicellidae	Tonicella	lineata		species		(Wood, 1815)
	imerss.org:PMLS:7007			Count: very many		Andy Lamb								PRESENT				Tonicella insignis					iNaturalist:498132								Tonicella insignis							Animalia	Mollusca	Polyplacophora	Chitonida	Tonicellidae	Tonicella	insignis		species		(Reeve, 1847)
	imerss.org:PMLS:7008			Count: few		Andy Lamb								PRESENT				Mopalia spectabilis					iNaturalist:364026								Mopalia spectabilis							Animalia	Mollusca	Polyplacophora	Chitonida	Mopaliidae	Mopalia	spectabilis		species		I. M. Cowan & G. M. Cowan, 1977
	imerss.org:PMLS:7009			Count: some		Andy Lamb								PRESENT				Lepidozona mertensii					iNaturalist:117621								Lepidozona mertensii							Animalia	Mollusca	Polyplacophora	Chitonida	Ischnochitonidae	Lepidozona	mertensii		species		(Middendorff, 1847)
	imerss.org:PMLS:7010					Andy Lamb		1						PRESENT				Cryptochiton stelleri					iNaturalist:49053								Cryptochiton stelleri							Animalia	Mollusca	Polyplacophora	Chitonida	Acanthochitonidae	Cryptochiton	stelleri		species		(Middendorff, 1847)
	imerss.org:PMLS:7011			Count: some		Andy Lamb								PRESENT				Chlamys hastata					iNaturalist:180013								Chlamys hastata							Animalia	Mollusca	Bivalvia	Pectinida	Pectinidae	Chlamys	hastata		species		(G. B. Sowerby II, 1842)
	imerss.org:PMLS:7012			Count: many		Andy Lamb								PRESENT				Crassadoma gigantea					iNaturalist:54526								Crassadoma gigantea							Animalia	Mollusca	Bivalvia	Pectinida	Pectinidae	Crassadoma	gigantea		species		(J.E. Gray, 1825)
	imerss.org:PMLS:7013			Count: very many		Andy Lamb								PRESENT				Pododesmus macrochisma					iNaturalist:68652								Pododesmus macrochisma							Animalia	Mollusca	Bivalvia	Pectinida	Anomiidae	Pododesmus	macrochisma		species		(Deshayes, 1839)
	imerss.org:PMLS:7014			Count: few		Andy Lamb								PRESENT				Puncturella cucullata					iNaturalist:904312								Puncturella cucullata							Animalia	Mollusca	Gastropoda	Lepetellida	Fissurellidae	Puncturella	cucullata		species		(Gould, 1846)
	imerss.org:PMLS:7015			Count: some		Andy Lamb								PRESENT				Nucella lamellosa					iNaturalist:117641								Nucella lamellosa							Animalia	Mollusca	Gastropoda	Neogastropoda	Muricidae	Nucella	lamellosa		species		(Gmelin, 1791)
	imerss.org:PMLS:7016			Count: some		Andy Lamb								PRESENT				Ceratostoma foliatum					iNaturalist:116687								Ceratostoma foliatum							Animalia	Mollusca	Gastropoda	Neogastropoda	Muricidae	Ceratostoma	foliatum		species		(Gmelin, 1791)
	imerss.org:PMLS:7017			Count: some		Andy Lamb								PRESENT				Amphissa columbiana					iNaturalist:117643								Amphissa columbiana							Animalia	Mollusca	Gastropoda	Neogastropoda	Columbellidae	Amphissa	columbiana		species		Dall, 1916
	imerss.org:PMLS:7018			Count: few		Andy Lamb								PRESENT				Paciocinebrina lurida					iNaturalist:910800								Paciocinebrina lurida							Animalia	Mollusca	Gastropoda	Neogastropoda	Muricidae	Paciocinebrina	lurida		species		(Middendorff, 1848)
	imerss.org:PMLS:7019			Count: few		Andy Lamb								PRESENT				Scabrotrophon maltzani					iNaturalist:500269								Scabrotrophon maltzani							Animalia	Mollusca	Gastropoda	Neogastropoda	Muricidae	Scabrotrophon	maltzani		species		(Kobelt, 1878)
	imerss.org:PMLS:7020			Count: few		Andy Lamb								PRESENT				Calliostoma ligatum					iNaturalist:129920								Calliostoma ligatum							Animalia	Mollusca	Gastropoda	Trochida	Calliostomatidae	Calliostoma	ligatum		species		(Gould, 1849)
	imerss.org:PMLS:7021			Count: few		Andy Lamb								PRESENT				Peltodoris nobilis					iNaturalist:48450								Peltodoris nobilis							Animalia	Mollusca	Gastropoda	Nudibranchia	Discodorididae	Peltodoris	nobilis		species		(MacFarland, 1905)
	imerss.org:PMLS:7022					Andy Lamb		1						PRESENT				Diaulula lentiginosa					iNaturalist:568137								Peltodoris lentiginosa							Animalia	Mollusca	Gastropoda	Nudibranchia	Discodorididae	Peltodoris	lentiginosa		species		(Millen, 1982)
	imerss.org:PMLS:7023			Count: few		Andy Lamb								PRESENT				Doris odhneri					iNaturalist:124210								Doris odhneri							Animalia	Mollusca	Gastropoda	Nudibranchia	Dorididae	Doris	odhneri		species		MacFarland, 1966
	imerss.org:PMLS:7024					Andy Lamb		1						PRESENT				Diaulula odonoghuei					iNaturalist:508237								Diaulula odonoghuei							Animalia	Mollusca	Gastropoda	Nudibranchia	Discodorididae	Diaulula	odonoghuei		species		(Steinberg, 1963)
	imerss.org:PMLS:7025			Count: few		Andy Lamb								PRESENT				Cadlina luteomarginata complex					iNaturalist:50146								Cadlina luteomarginata							Animalia	Mollusca	Gastropoda	Nudibranchia	Cadlinidae	Cadlina	luteomarginata		species		MacFarland, 1966
	imerss.org:PMLS:7026					Andy Lamb		1						PRESENT				Diaphorodoris lirulatocauda					iNaturalist:48630								Diaphorodoris lirulatocauda							Animalia	Mollusca	Gastropoda	Nudibranchia	Calycidorididae	Diaphorodoris	lirulatocauda		species		Millen, 1985
	imerss.org:PMLS:7027			Count: few		Andy Lamb								PRESENT				Triopha modesta					iNaturalist:1133369								Triopha modesta							Animalia	Mollusca	Gastropoda	Nudibranchia	Polyceridae	Triopha	modesta		species		Bergh, 1880
	imerss.org:PMLS:7028			Count: many		Andy Lamb								PRESENT				Dirona albolineata					iNaturalist:47477								Dirona albolineata							Animalia	Mollusca	Gastropoda	Nudibranchia	Dironidae	Dirona	albolineata		species		MacFarland, 1905
	imerss.org:PMLS:7029			Count: some		Andy Lamb								PRESENT				Hermissenda crassicornis					iNaturalist:495552								Hermissenda crassicornis							Animalia	Mollusca	Gastropoda	Nudibranchia	Myrrhinidae	Hermissenda	crassicornis		species		(Eschscholtz, 1831)
	imerss.org:PMLS:7030			Count: few		Andy Lamb								PRESENT				Orienthella trilineata					iNaturalist:764704								Orienthella trilineata							Animalia	Mollusca	Gastropoda	Nudibranchia	Coryphellidae	Orienthella	trilineata		species		(O'Donoghue, 1921)
	imerss.org:PMLS:7031					Andy Lamb		1						PRESENT				Enteroctopus dofleini					iNaturalist:48863								Enteroctopus dofleini							Animalia	Mollusca	Cephalopoda	Octopoda	Enteroctopodidae	Enteroctopus	dofleini		species		(Wülker, 1910)
	imerss.org:PMLS:7135			Count: few		Andy Lamb								PRESENT				Tonicella lineata					iNaturalist:47425								Tonicella lineata							Animalia	Mollusca	Polyplacophora	Chitonida	Tonicellidae	Tonicella	lineata		species		(Wood, 1815)
	imerss.org:PMLS:7136			Count: many		Andy Lamb								PRESENT				Mopalia lignosa					iNaturalist:51724								Mopalia lignosa							Animalia	Mollusca	Polyplacophora	Chitonida	Mopaliidae	Mopalia	lignosa		species		(Gould, 1846)
	imerss.org:PMLS:7137			Count: some		Andy Lamb								PRESENT				Lepidozona mertensii					iNaturalist:117621								Lepidozona mertensii							Animalia	Mollusca	Polyplacophora	Chitonida	Ischnochitonidae	Lepidozona	mertensii		species		(Middendorff, 1847)
	imerss.org:PMLS:7138			Count: many		Andy Lamb								PRESENT				Chlamys hastata					iNaturalist:180013								Chlamys hastata							Animalia	Mollusca	Bivalvia	Pectinida	Pectinidae	Chlamys	hastata		species		(G. B. Sowerby II, 1842)
	imerss.org:PMLS:7139			Count: some		Andy Lamb								PRESENT				Crassadoma gigantea					iNaturalist:54526								Crassadoma gigantea							Animalia	Mollusca	Bivalvia	Pectinida	Pectinidae	Crassadoma	gigantea		species		(J.E. Gray, 1825)
	imerss.org:PMLS:7140			Count: many		Andy Lamb								PRESENT				Pododesmus macrochisma					iNaturalist:68652								Pododesmus macrochisma							Animalia	Mollusca	Bivalvia	Pectinida	Anomiidae	Pododesmus	macrochisma		species		(Deshayes, 1839)
	imerss.org:PMLS:7141			Count: few		Andy Lamb								PRESENT				Leukoma staminea					iNaturalist:333608								Leukoma staminea							Animalia	Mollusca	Bivalvia	Venerida	Veneridae	Leukoma	staminea		species		(Conrad, 1837)
	imerss.org:PMLS:7142			Count: some		Andy Lamb								PRESENT				Mytilimeria nuttalli					iNaturalist:873896								Mytilimeria nuttalli							Animalia	Mollusca	Bivalvia		Lyonsiidae	Mytilimeria	nuttalli		species		Conrad, 1837
	imerss.org:PMLS:7143			Count: few		Andy Lamb								PRESENT				Entodesma navicula					iNaturalist:339164								Entodesma navicula							Animalia	Mollusca	Bivalvia		Lyonsiidae	Entodesma	navicula		species		(Adams & Reeve, 1850)
	imerss.org:PMLS:7144					Andy Lamb		1						PRESENT				Diodora aspera					iNaturalist:64148								Diodora aspera							Animalia	Mollusca	Gastropoda	Lepetellida	Fissurellidae	Diodora	aspera		species		(Rathke, 1833)
	imerss.org:PMLS:7145					Andy Lamb		1						PRESENT				Puncturella cucullata					iNaturalist:904312								Puncturella cucullata							Animalia	Mollusca	Gastropoda	Lepetellida	Fissurellidae	Puncturella	cucullata		species		(Gould, 1846)
	imerss.org:PMLS:7146			Count: many		Andy Lamb								PRESENT				Nucella lamellosa					iNaturalist:117641								Nucella lamellosa							Animalia	Mollusca	Gastropoda	Neogastropoda	Muricidae	Nucella	lamellosa		species		(Gmelin, 1791)
	imerss.org:PMLS:7147			Count: some		Andy Lamb								PRESENT				Ceratostoma foliatum					iNaturalist:116687								Ceratostoma foliatum							Animalia	Mollusca	Gastropoda	Neogastropoda	Muricidae	Ceratostoma	foliatum		species		(Gmelin, 1791)
	imerss.org:PMLS:7148			Count: few		Andy Lamb								PRESENT				Lirabuccinum dirum					iNaturalist:117642								Lirabuccinum dirum							Animalia	Mollusca	Gastropoda	Neogastropoda	Tudiclidae	Lirabuccinum	dirum		species		(Reeve, 1846)
	imerss.org:PMLS:7149			Count: some		Andy Lamb								PRESENT				Calliostoma ligatum					iNaturalist:129920								Calliostoma ligatum							Animalia	Mollusca	Gastropoda	Trochida	Calliostomatidae	Calliostoma	ligatum		species		(Gould, 1849)
	imerss.org:PMLS:7150			Count: few		Andy Lamb								PRESENT				Peltodoris nobilis					iNaturalist:48450								Peltodoris nobilis							Animalia	Mollusca	Gastropoda	Nudibranchia	Discodorididae	Peltodoris	nobilis		species		(MacFarland, 1905)
	imerss.org:PMLS:7151					Andy Lamb		3						PRESENT				Doris montereyensis					iNaturalist:47469								Doris montereyensis							Animalia	Mollusca	Gastropoda	Nudibranchia	Dorididae	Doris	montereyensis		species		J. G. Cooper, 1863
	imerss.org:PMLS:7152					Andy Lamb		2						PRESENT				Doris odhneri					iNaturalist:124210								Doris odhneri							Animalia	Mollusca	Gastropoda	Nudibranchia	Dorididae	Doris	odhneri		species		MacFarland, 1966
	imerss.org:PMLS:7153					Andy Lamb		1						PRESENT				Geitodoris heathi					iNaturalist:47505								Geitodoris heathi							Animalia	Mollusca	Gastropoda	Nudibranchia	Discodorididae	Geitodoris	heathi		species		(MacFarland, 1905)
	imerss.org:PMLS:7154					Andy Lamb		2						PRESENT				Diaulula odonoghuei					iNaturalist:508237								Diaulula odonoghuei							Animalia	Mollusca	Gastropoda	Nudibranchia	Discodorididae	Diaulula	odonoghuei		species		(Steinberg, 1963)
	imerss.org:PMLS:7155			Count: some		Andy Lamb								PRESENT				Cadlina luteomarginata complex					iNaturalist:50146								Cadlina luteomarginata							Animalia	Mollusca	Gastropoda	Nudibranchia	Cadlinidae	Cadlina	luteomarginata		species		MacFarland, 1966
	imerss.org:PMLS:7156			Count: few		Andy Lamb								PRESENT				Dirona albolineata					iNaturalist:47477								Dirona albolineata							Animalia	Mollusca	Gastropoda	Nudibranchia	Dironidae	Dirona	albolineata		species		MacFarland, 1905
	imerss.org:PMLS:7157			Count: some		Andy Lamb								PRESENT				Hermissenda crassicornis					iNaturalist:495552								Hermissenda crassicornis							Animalia	Mollusca	Gastropoda	Nudibranchia	Myrrhinidae	Hermissenda	crassicornis		species		(Eschscholtz, 1831)
	imerss.org:PMLS:7224			Count: few		Andy Lamb								PRESENT				Tonicella lineata					iNaturalist:47425								Tonicella lineata							Animalia	Mollusca	Polyplacophora	Chitonida	Tonicellidae	Tonicella	lineata		species		(Wood, 1815)
	imerss.org:PMLS:7225			Count: few		Andy Lamb								PRESENT				Chlamys rubida					iNaturalist:84496								Chlamys rubida							Animalia	Mollusca	Bivalvia	Pectinida	Pectinidae	Chlamys	rubida		species		(Hinds, 1845)
	imerss.org:PMLS:7226			Count: many		Andy Lamb								PRESENT				Pododesmus macrochisma					iNaturalist:68652								Pododesmus macrochisma							Animalia	Mollusca	Bivalvia	Pectinida	Anomiidae	Pododesmus	macrochisma		species		(Deshayes, 1839)
	imerss.org:PMLS:7227			Count: few		Andy Lamb								PRESENT				Cadlina luteomarginata complex					iNaturalist:50146								Cadlina luteomarginata							Animalia	Mollusca	Gastropoda	Nudibranchia	Cadlinidae	Cadlina	luteomarginata		species		MacFarland, 1966
	imerss.org:PMLS:7228					Andy Lamb		1						PRESENT				Acanthodoris atrogriseata					iNaturalist:1080211								Acanthodoris atrogriseata							Animalia	Mollusca	Gastropoda	Nudibranchia	Onchidorididae	Acanthodoris	atrogriseata		species		O'Donoghue, 1927
	imerss.org:PMLS:7229			Count: many		Andy Lamb								PRESENT				Dendronotus iris					iNaturalist:47706								Dendronotus iris							Animalia	Mollusca	Gastropoda	Nudibranchia	Dendronotidae	Dendronotus	iris		species		J. G. Cooper, 1863
	imerss.org:PMLS:7292			Count: abundant		Andy Lamb								PRESENT				Tonicella lineata					iNaturalist:47425								Tonicella lineata							Animalia	Mollusca	Polyplacophora	Chitonida	Tonicellidae	Tonicella	lineata		species		(Wood, 1815)
	imerss.org:PMLS:7293					Andy Lamb		1						PRESENT				Mopalia vespertina					iNaturalist:364027								Mopalia vespertina							Animalia	Mollusca	Polyplacophora	Chitonida	Mopaliidae	Mopalia	vespertina		species		(Gould, 1852)
	imerss.org:PMLS:7294			Count: very many		Andy Lamb								PRESENT				Lepidozona mertensii					iNaturalist:117621								Lepidozona mertensii							Animalia	Mollusca	Polyplacophora	Chitonida	Ischnochitonidae	Lepidozona	mertensii		species		(Middendorff, 1847)
	imerss.org:PMLS:7295			Count: abundant		Andy Lamb								PRESENT				Chlamys hastata					iNaturalist:180013								Chlamys hastata							Animalia	Mollusca	Bivalvia	Pectinida	Pectinidae	Chlamys	hastata		species		(G. B. Sowerby II, 1842)
	imerss.org:PMLS:7296			Count: many		Andy Lamb								PRESENT				Crassadoma gigantea					iNaturalist:54526								Crassadoma gigantea							Animalia	Mollusca	Bivalvia	Pectinida	Pectinidae	Crassadoma	gigantea		species		(J.E. Gray, 1825)
	imerss.org:PMLS:7297			Count: few		Andy Lamb								PRESENT				Gari californica					iNaturalist:354323								Gari californica							Animalia	Mollusca	Bivalvia	Cardiida	Psammobiidae	Gari	californica		species		(Conrad, 1849)
	imerss.org:PMLS:7298			Count: few		Andy Lamb								PRESENT				Humilaria kennerleyi					iNaturalist:873901								Humilaria kennerleyi							Animalia	Mollusca	Bivalvia	Venerida	Veneridae	Humilaria	kennerleyi		species		(Reeve, 1863)
	imerss.org:PMLS:7299					Andy Lamb		1						PRESENT				Entodesma navicula					iNaturalist:339164								Entodesma navicula							Animalia	Mollusca	Bivalvia		Lyonsiidae	Entodesma	navicula		species		(Adams & Reeve, 1850)
	imerss.org:PMLS:7300			Count: many		Andy Lamb								PRESENT				Acmaea mitra					iNaturalist:47676								Acmaea mitra							Animalia	Mollusca	Gastropoda		Acmaeidae	Acmaea	mitra		species		Rathke, 1833
	imerss.org:PMLS:7301					Andy Lamb		1						PRESENT				Haliotis kamtschatkana					iNaturalist:56654								Haliotis kamtschatkana							Animalia	Mollusca	Gastropoda	Lepetellida	Haliotidae	Haliotis	kamtschatkana		species		Jonas, 1845
	imerss.org:PMLS:7302			Count: some		Andy Lamb								PRESENT				Nucella lamellosa					iNaturalist:117641								Nucella lamellosa							Animalia	Mollusca	Gastropoda	Neogastropoda	Muricidae	Nucella	lamellosa		species		(Gmelin, 1791)
	imerss.org:PMLS:7303			Count: many		Andy Lamb								PRESENT				Ceratostoma foliatum					iNaturalist:116687								Ceratostoma foliatum							Animalia	Mollusca	Gastropoda	Neogastropoda	Muricidae	Ceratostoma	foliatum		species		(Gmelin, 1791)
	imerss.org:PMLS:7304			Count: few		Andy Lamb								PRESENT				Amphissa columbiana					iNaturalist:117643								Amphissa columbiana							Animalia	Mollusca	Gastropoda	Neogastropoda	Columbellidae	Amphissa	columbiana		species		Dall, 1916
	imerss.org:PMLS:7305			Count: few		Andy Lamb								PRESENT				Paciocinebrina lurida					iNaturalist:910800								Paciocinebrina lurida							Animalia	Mollusca	Gastropoda	Neogastropoda	Muricidae	Paciocinebrina	lurida		species		(Middendorff, 1848)
	imerss.org:PMLS:7306			Count: few		Andy Lamb								PRESENT				Calliostoma ligatum					iNaturalist:129920								Calliostoma ligatum							Animalia	Mollusca	Gastropoda	Trochida	Calliostomatidae	Calliostoma	ligatum		species		(Gould, 1849)
	imerss.org:PMLS:7307			Count: few		Andy Lamb								PRESENT				Trichotropis cancellata					iNaturalist:447177								Trichotropis cancellata							Animalia	Mollusca	Gastropoda	Littorinimorpha	Capulidae	Trichotropis	cancellata		species		Hinds, 1843
	imerss.org:PMLS:7308			Count: some		Andy Lamb								PRESENT				Peltodoris nobilis					iNaturalist:48450								Peltodoris nobilis							Animalia	Mollusca	Gastropoda	Nudibranchia	Discodorididae	Peltodoris	nobilis		species		(MacFarland, 1905)
	imerss.org:PMLS:7309			Count: many		Andy Lamb								PRESENT				Cadlina luteomarginata complex					iNaturalist:50146								Cadlina luteomarginata							Animalia	Mollusca	Gastropoda	Nudibranchia	Cadlinidae	Cadlina	luteomarginata		species		MacFarland, 1966
	imerss.org:PMLS:7310					Andy Lamb		1						PRESENT				Limacia cockerelli					iNaturalist:538830								Limacia cockerelli							Animalia	Mollusca	Gastropoda	Nudibranchia	Polyceridae	Limacia	cockerelli		species		(MacFarland, 1905)
	imerss.org:PMLS:7311					Andy Lamb		1						PRESENT				Tritonia festiva					iNaturalist:48827								Tritonia festiva							Animalia	Mollusca	Gastropoda	Nudibranchia	Tritoniidae	Tritonia	festiva		species		(Stearns, 1873)
	imerss.org:PMLS:7312					Andy Lamb		1						PRESENT				Dirona albolineata					iNaturalist:47477								Dirona albolineata							Animalia	Mollusca	Gastropoda	Nudibranchia	Dironidae	Dirona	albolineata		species		MacFarland, 1905
	imerss.org:PMLS:7313			Count: some		Andy Lamb								PRESENT				Hermissenda crassicornis					iNaturalist:495552								Hermissenda crassicornis							Animalia	Mollusca	Gastropoda	Nudibranchia	Myrrhinidae	Hermissenda	crassicornis		species		(Eschscholtz, 1831)
	imerss.org:PMLS:7314					Andy Lamb		1						PRESENT				Enteroctopus dofleini					iNaturalist:48863								Enteroctopus dofleini							Animalia	Mollusca	Cephalopoda	Octopoda	Enteroctopodidae	Enteroctopus	dofleini		species		(Wülker, 1910)
	imerss.org:PMLS:7416			Count: very many		Andy Lamb								PRESENT				Tonicella lineata					iNaturalist:47425								Tonicella lineata							Animalia	Mollusca	Polyplacophora	Chitonida	Tonicellidae	Tonicella	lineata		species		(Wood, 1815)
	imerss.org:PMLS:7417			Count: many		Andy Lamb								PRESENT				Lepidozona mertensii					iNaturalist:117621								Lepidozona mertensii							Animalia	Mollusca	Polyplacophora	Chitonida	Ischnochitonidae	Lepidozona	mertensii		species		(Middendorff, 1847)
	imerss.org:PMLS:7418			Count: some		Andy Lamb								PRESENT				Chlamys hastata					iNaturalist:180013								Chlamys hastata							Animalia	Mollusca	Bivalvia	Pectinida	Pectinidae	Chlamys	hastata		species		(G. B. Sowerby II, 1842)
	imerss.org:PMLS:7419			Count: very many		Andy Lamb								PRESENT				Crassadoma gigantea					iNaturalist:54526								Crassadoma gigantea							Animalia	Mollusca	Bivalvia	Pectinida	Pectinidae	Crassadoma	gigantea		species		(J.E. Gray, 1825)
	imerss.org:PMLS:7420			Count: few		Andy Lamb								PRESENT				Mytilimeria nuttalli					iNaturalist:873896								Mytilimeria nuttalli							Animalia	Mollusca	Bivalvia		Lyonsiidae	Mytilimeria	nuttalli		species		Conrad, 1837
	imerss.org:PMLS:7421			Count: some		Andy Lamb								PRESENT				Diodora aspera					iNaturalist:64148								Diodora aspera							Animalia	Mollusca	Gastropoda	Lepetellida	Fissurellidae	Diodora	aspera		species		(Rathke, 1833)
	imerss.org:PMLS:7422			Count: some		Andy Lamb								PRESENT				Nucella lamellosa					iNaturalist:117641								Nucella lamellosa							Animalia	Mollusca	Gastropoda	Neogastropoda	Muricidae	Nucella	lamellosa		species		(Gmelin, 1791)
	imerss.org:PMLS:7423			Count: some		Andy Lamb								PRESENT				Ceratostoma foliatum					iNaturalist:116687								Ceratostoma foliatum							Animalia	Mollusca	Gastropoda	Neogastropoda	Muricidae	Ceratostoma	foliatum		species		(Gmelin, 1791)
	imerss.org:PMLS:7424			Count: some		Andy Lamb								PRESENT				Lirabuccinum dirum					iNaturalist:117642								Lirabuccinum dirum							Animalia	Mollusca	Gastropoda	Neogastropoda	Tudiclidae	Lirabuccinum	dirum		species		(Reeve, 1846)
	imerss.org:PMLS:7425					Andy Lamb		1						PRESENT				Calliostoma ligatum					iNaturalist:129920								Calliostoma ligatum							Animalia	Mollusca	Gastropoda	Trochida	Calliostomatidae	Calliostoma	ligatum		species		(Gould, 1849)
	imerss.org:PMLS:7426			Count: few		Andy Lamb								PRESENT				Peltodoris nobilis					iNaturalist:48450								Peltodoris nobilis							Animalia	Mollusca	Gastropoda	Nudibranchia	Discodorididae	Peltodoris	nobilis		species		(MacFarland, 1905)
	imerss.org:PMLS:7427					Andy Lamb		2						PRESENT				Diaulula lentiginosa					iNaturalist:568137								Peltodoris lentiginosa							Animalia	Mollusca	Gastropoda	Nudibranchia	Discodorididae	Peltodoris	lentiginosa		species		(Millen, 1982)
	imerss.org:PMLS:7428					Andy Lamb		1						PRESENT				Doris odhneri					iNaturalist:124210								Doris odhneri							Animalia	Mollusca	Gastropoda	Nudibranchia	Dorididae	Doris	odhneri		species		MacFarland, 1966
	imerss.org:PMLS:7429					Andy Lamb		1						PRESENT				Geitodoris heathi					iNaturalist:47505								Geitodoris heathi							Animalia	Mollusca	Gastropoda	Nudibranchia	Discodorididae	Geitodoris	heathi		species		(MacFarland, 1905)
	imerss.org:PMLS:7430					Andy Lamb		2						PRESENT				Diaulula odonoghuei					iNaturalist:508237								Diaulula odonoghuei							Animalia	Mollusca	Gastropoda	Nudibranchia	Discodorididae	Diaulula	odonoghuei		species		(Steinberg, 1963)
	imerss.org:PMLS:7431			Count: some		Andy Lamb								PRESENT				Cadlina luteomarginata complex					iNaturalist:50146								Cadlina luteomarginata							Animalia	Mollusca	Gastropoda	Nudibranchia	Cadlinidae	Cadlina	luteomarginata		species		MacFarland, 1966
	imerss.org:PMLS:7432					Andy Lamb		1						PRESENT				Tritonia festiva					iNaturalist:48827								Tritonia festiva							Animalia	Mollusca	Gastropoda	Nudibranchia	Tritoniidae	Tritonia	festiva		species		(Stearns, 1873)
	imerss.org:PMLS:7433			Count: few		Andy Lamb								PRESENT				Hermissenda crassicornis					iNaturalist:495552								Hermissenda crassicornis							Animalia	Mollusca	Gastropoda	Nudibranchia	Myrrhinidae	Hermissenda	crassicornis		species		(Eschscholtz, 1831)
	imerss.org:PMLS:7434					Andy Lamb		1						PRESENT				Orienthella trilineata					iNaturalist:764704								Orienthella trilineata							Animalia	Mollusca	Gastropoda	Nudibranchia	Coryphellidae	Orienthella	trilineata		species		(O'Donoghue, 1921)
	imerss.org:PMLS:7526			Count: some		Andy Lamb								PRESENT				Tonicella lineata					iNaturalist:47425								Tonicella lineata							Animalia	Mollusca	Polyplacophora	Chitonida	Tonicellidae	Tonicella	lineata		species		(Wood, 1815)
	imerss.org:PMLS:7527			Count: few		Andy Lamb								PRESENT				Lepidozona mertensii					iNaturalist:117621								Lepidozona mertensii							Animalia	Mollusca	Polyplacophora	Chitonida	Ischnochitonidae	Lepidozona	mertensii		species		(Middendorff, 1847)
	imerss.org:PMLS:7528			Count: some		Andy Lamb								PRESENT				Chlamys hastata					iNaturalist:180013								Chlamys hastata							Animalia	Mollusca	Bivalvia	Pectinida	Pectinidae	Chlamys	hastata		species		(G. B. Sowerby II, 1842)
	imerss.org:PMLS:7529			Count: many		Andy Lamb								PRESENT				Crassadoma gigantea					iNaturalist:54526								Crassadoma gigantea							Animalia	Mollusca	Bivalvia	Pectinida	Pectinidae	Crassadoma	gigantea		species		(J.E. Gray, 1825)
	imerss.org:PMLS:7530			Count: few		Andy Lamb								PRESENT				Mytilimeria nuttalli					iNaturalist:873896								Mytilimeria nuttalli							Animalia	Mollusca	Bivalvia		Lyonsiidae	Mytilimeria	nuttalli		species		Conrad, 1837
	imerss.org:PMLS:7531					Andy Lamb		2						PRESENT				Cryptobranchia concentrica					iNaturalist:1240081								Lepeta concentrica							Animalia	Mollusca	Gastropoda		Lepetidae	Lepeta	concentrica		species		(Middendorff, 1848)
	imerss.org:PMLS:7532					Andy Lamb		1						PRESENT				Diodora aspera					iNaturalist:64148								Diodora aspera							Animalia	Mollusca	Gastropoda	Lepetellida	Fissurellidae	Diodora	aspera		species		(Rathke, 1833)
	imerss.org:PMLS:7533			Count: few		Andy Lamb								PRESENT				Puncturella cucullata					iNaturalist:904312								Puncturella cucullata							Animalia	Mollusca	Gastropoda	Lepetellida	Fissurellidae	Puncturella	cucullata		species		(Gould, 1846)
	imerss.org:PMLS:7534			Count: some		Andy Lamb								PRESENT				Nucella lamellosa					iNaturalist:117641								Nucella lamellosa							Animalia	Mollusca	Gastropoda	Neogastropoda	Muricidae	Nucella	lamellosa		species		(Gmelin, 1791)
	imerss.org:PMLS:7535			Count: few		Andy Lamb								PRESENT				Ceratostoma foliatum					iNaturalist:116687								Ceratostoma foliatum							Animalia	Mollusca	Gastropoda	Neogastropoda	Muricidae	Ceratostoma	foliatum		species		(Gmelin, 1791)
	imerss.org:PMLS:7536			Count: some		Andy Lamb								PRESENT				Amphissa columbiana					iNaturalist:117643								Amphissa columbiana							Animalia	Mollusca	Gastropoda	Neogastropoda	Columbellidae	Amphissa	columbiana		species		Dall, 1916
	imerss.org:PMLS:7537			Count: few		Andy Lamb								PRESENT				Calliostoma ligatum					iNaturalist:129920								Calliostoma ligatum							Animalia	Mollusca	Gastropoda	Trochida	Calliostomatidae	Calliostoma	ligatum		species		(Gould, 1849)
	imerss.org:PMLS:7538					Andy Lamb		1						PRESENT				Fusitriton oregonensis					iNaturalist:448389								Fusitriton oregonensis							Animalia	Mollusca	Gastropoda	Littorinimorpha	Cymatiidae	Fusitriton	oregonensis		species		(Redfield, 1846)
	imerss.org:PMLS:7539					Andy Lamb		1						PRESENT				Diaulula lentiginosa					iNaturalist:568137								Peltodoris lentiginosa							Animalia	Mollusca	Gastropoda	Nudibranchia	Discodorididae	Peltodoris	lentiginosa		species		(Millen, 1982)
	imerss.org:PMLS:7540					Andy Lamb		1						PRESENT				Doris odhneri					iNaturalist:124210								Doris odhneri							Animalia	Mollusca	Gastropoda	Nudibranchia	Dorididae	Doris	odhneri		species		MacFarland, 1966
	imerss.org:PMLS:7541			Count: some		Andy Lamb								PRESENT				Cadlina luteomarginata complex					iNaturalist:50146								Cadlina luteomarginata							Animalia	Mollusca	Gastropoda	Nudibranchia	Cadlinidae	Cadlina	luteomarginata		species		MacFarland, 1966
	imerss.org:PMLS:7630			Count: very many		Andy Lamb								PRESENT				Tonicella lineata					iNaturalist:47425								Tonicella lineata							Animalia	Mollusca	Polyplacophora	Chitonida	Tonicellidae	Tonicella	lineata		species		(Wood, 1815)
	imerss.org:PMLS:7631			Count: few		Andy Lamb								PRESENT				Lepidozona mertensii					iNaturalist:117621								Lepidozona mertensii							Animalia	Mollusca	Polyplacophora	Chitonida	Ischnochitonidae	Lepidozona	mertensii		species		(Middendorff, 1847)
	imerss.org:PMLS:7632			Count: few		Andy Lamb								PRESENT				Chlamys hastata					iNaturalist:180013								Chlamys hastata							Animalia	Mollusca	Bivalvia	Pectinida	Pectinidae	Chlamys	hastata		species		(G. B. Sowerby II, 1842)
	imerss.org:PMLS:7633			Count: some		Andy Lamb								PRESENT				Crassadoma gigantea					iNaturalist:54526								Crassadoma gigantea							Animalia	Mollusca	Bivalvia	Pectinida	Pectinidae	Crassadoma	gigantea		species		(J.E. Gray, 1825)
	imerss.org:PMLS:7634			Count: some		Andy Lamb								PRESENT				Pododesmus macrochisma					iNaturalist:68652								Pododesmus macrochisma							Animalia	Mollusca	Bivalvia	Pectinida	Anomiidae	Pododesmus	macrochisma		species		(Deshayes, 1839)
	imerss.org:PMLS:7635			Count: few		Andy Lamb								PRESENT				Gari californica					iNaturalist:354323								Gari californica							Animalia	Mollusca	Bivalvia	Cardiida	Psammobiidae	Gari	californica		species		(Conrad, 1849)
	imerss.org:PMLS:7636			Count: few		Andy Lamb								PRESENT				Humilaria kennerleyi					iNaturalist:873901								Humilaria kennerleyi							Animalia	Mollusca	Bivalvia	Venerida	Veneridae	Humilaria	kennerleyi		species		(Reeve, 1863)
	imerss.org:PMLS:7637			Count: some		Andy Lamb								PRESENT				Acmaea mitra					iNaturalist:47676								Acmaea mitra							Animalia	Mollusca	Gastropoda		Acmaeidae	Acmaea	mitra		species		Rathke, 1833
	imerss.org:PMLS:7638					Andy Lamb		1						PRESENT				Diodora aspera					iNaturalist:64148								Diodora aspera							Animalia	Mollusca	Gastropoda	Lepetellida	Fissurellidae	Diodora	aspera		species		(Rathke, 1833)
	imerss.org:PMLS:7639					Andy Lamb		2						PRESENT				Haliotis kamtschatkana					iNaturalist:56654								Haliotis kamtschatkana							Animalia	Mollusca	Gastropoda	Lepetellida	Haliotidae	Haliotis	kamtschatkana		species		Jonas, 1845
	imerss.org:PMLS:7640			Count: some		Andy Lamb								PRESENT				Nucella lamellosa					iNaturalist:117641								Nucella lamellosa							Animalia	Mollusca	Gastropoda	Neogastropoda	Muricidae	Nucella	lamellosa		species		(Gmelin, 1791)
	imerss.org:PMLS:7641			Count: few		Andy Lamb								PRESENT				Ceratostoma foliatum					iNaturalist:116687								Ceratostoma foliatum							Animalia	Mollusca	Gastropoda	Neogastropoda	Muricidae	Ceratostoma	foliatum		species		(Gmelin, 1791)
	imerss.org:PMLS:7642					Andy Lamb		2						PRESENT				Lirabuccinum dirum					iNaturalist:117642								Lirabuccinum dirum							Animalia	Mollusca	Gastropoda	Neogastropoda	Tudiclidae	Lirabuccinum	dirum		species		(Reeve, 1846)
	imerss.org:PMLS:7643			Count: many		Andy Lamb								PRESENT				Amphissa columbiana					iNaturalist:117643								Amphissa columbiana							Animalia	Mollusca	Gastropoda	Neogastropoda	Columbellidae	Amphissa	columbiana		species		Dall, 1916
	imerss.org:PMLS:7644					Andy Lamb		1						PRESENT				Scabrotrophon maltzani					iNaturalist:500269								Scabrotrophon maltzani							Animalia	Mollusca	Gastropoda	Neogastropoda	Muricidae	Scabrotrophon	maltzani		species		(Kobelt, 1878)
	imerss.org:PMLS:7645					Andy Lamb		1						PRESENT				Epitonium indianorum					iNaturalist:129921								Epitonium indianorum							Animalia	Mollusca	Gastropoda		Epitoniidae	Epitonium	indianorum		species		(Carpenter, 1865)
	imerss.org:PMLS:7646			Count: some		Andy Lamb								PRESENT				Calliostoma ligatum					iNaturalist:129920								Calliostoma ligatum							Animalia	Mollusca	Gastropoda	Trochida	Calliostomatidae	Calliostoma	ligatum		species		(Gould, 1849)
	imerss.org:PMLS:7647			Count: few		Andy Lamb								PRESENT				Trichotropis cancellata					iNaturalist:447177								Trichotropis cancellata							Animalia	Mollusca	Gastropoda	Littorinimorpha	Capulidae	Trichotropis	cancellata		species		Hinds, 1843
	imerss.org:PMLS:7648					Andy Lamb		1						PRESENT				Doris odhneri					iNaturalist:124210								Doris odhneri							Animalia	Mollusca	Gastropoda	Nudibranchia	Dorididae	Doris	odhneri		species		MacFarland, 1966
	imerss.org:PMLS:7649			Count: some		Andy Lamb								PRESENT				Cadlina luteomarginata complex					iNaturalist:50146								Cadlina luteomarginata							Animalia	Mollusca	Gastropoda	Nudibranchia	Cadlinidae	Cadlina	luteomarginata		species		MacFarland, 1966
	imerss.org:PMLS:7650					Andy Lamb		2						PRESENT				Tritonia festiva					iNaturalist:48827								Tritonia festiva							Animalia	Mollusca	Gastropoda	Nudibranchia	Tritoniidae	Tritonia	festiva		species		(Stearns, 1873)
	imerss.org:PMLS:7651					Andy Lamb		1						PRESENT				Tochuina gigantea					iNaturalist:873733								Tochuina gigantea							Animalia	Mollusca	Gastropoda	Nudibranchia	Tritoniidae	Tochuina	gigantea		species		(Bergh, 1904)
	imerss.org:PMLS:7731			Count: some		Andy Lamb								PRESENT				Tonicella lineata					iNaturalist:47425								Tonicella lineata							Animalia	Mollusca	Polyplacophora	Chitonida	Tonicellidae	Tonicella	lineata		species		(Wood, 1815)
	imerss.org:PMLS:7732			Count: few		Andy Lamb								PRESENT				Tonicella insignis					iNaturalist:498132								Tonicella insignis							Animalia	Mollusca	Polyplacophora	Chitonida	Tonicellidae	Tonicella	insignis		species		(Reeve, 1847)
	imerss.org:PMLS:7733			Count: some		Andy Lamb								PRESENT				Cryptochiton stelleri					iNaturalist:49053								Cryptochiton stelleri							Animalia	Mollusca	Polyplacophora	Chitonida	Acanthochitonidae	Cryptochiton	stelleri		species		(Middendorff, 1847)
	imerss.org:PMLS:7734			Count: few		Andy Lamb								PRESENT				Chlamys hastata					iNaturalist:180013								Chlamys hastata							Animalia	Mollusca	Bivalvia	Pectinida	Pectinidae	Chlamys	hastata		species		(G. B. Sowerby II, 1842)
	imerss.org:PMLS:7735			Count: few		Andy Lamb								PRESENT				Crassadoma gigantea					iNaturalist:54526								Crassadoma gigantea							Animalia	Mollusca	Bivalvia	Pectinida	Pectinidae	Crassadoma	gigantea		species		(J.E. Gray, 1825)
	imerss.org:PMLS:7736			Count: some		Andy Lamb								PRESENT				Pododesmus macrochisma					iNaturalist:68652								Pododesmus macrochisma							Animalia	Mollusca	Bivalvia	Pectinida	Anomiidae	Pododesmus	macrochisma		species		(Deshayes, 1839)
	imerss.org:PMLS:7737			Count: few		Andy Lamb								PRESENT				Leukoma staminea					iNaturalist:333608								Leukoma staminea							Animalia	Mollusca	Bivalvia	Venerida	Veneridae	Leukoma	staminea		species		(Conrad, 1837)
	imerss.org:PMLS:7738			Count: some		Andy Lamb								PRESENT				Ceratostoma foliatum					iNaturalist:116687								Ceratostoma foliatum							Animalia	Mollusca	Gastropoda	Neogastropoda	Muricidae	Ceratostoma	foliatum		species		(Gmelin, 1791)
	imerss.org:PMLS:7739			Count: few		Andy Lamb								PRESENT				Lirabuccinum dirum					iNaturalist:117642								Lirabuccinum dirum							Animalia	Mollusca	Gastropoda	Neogastropoda	Tudiclidae	Lirabuccinum	dirum		species		(Reeve, 1846)
	imerss.org:PMLS:7740			Count: few		Andy Lamb								PRESENT				Calliostoma ligatum					iNaturalist:129920								Calliostoma ligatum							Animalia	Mollusca	Gastropoda	Trochida	Calliostomatidae	Calliostoma	ligatum		species		(Gould, 1849)
	imerss.org:PMLS:7741			Count: few		Andy Lamb								PRESENT				Doris odhneri					iNaturalist:124210								Doris odhneri							Animalia	Mollusca	Gastropoda	Nudibranchia	Dorididae	Doris	odhneri		species		MacFarland, 1966
	imerss.org:PMLS:7742					Andy Lamb		2						PRESENT				Geitodoris heathi					iNaturalist:47505								Geitodoris heathi							Animalia	Mollusca	Gastropoda	Nudibranchia	Discodorididae	Geitodoris	heathi		species		(MacFarland, 1905)
	imerss.org:PMLS:7743			Count: many		Andy Lamb								PRESENT				Cadlina luteomarginata complex					iNaturalist:50146								Cadlina luteomarginata							Animalia	Mollusca	Gastropoda	Nudibranchia	Cadlinidae	Cadlina	luteomarginata		species		MacFarland, 1966
	imerss.org:PMLS:7744			Count: some		Andy Lamb								PRESENT				Dirona pellucida					iNaturalist:50447								Dirona pellucida							Animalia	Mollusca	Gastropoda	Nudibranchia	Dironidae	Dirona	pellucida		species		Volodchenko, 1941
	imerss.org:PMLS:7834			Count: very many		Andy Lamb								PRESENT				Tonicella lineata					iNaturalist:47425								Tonicella lineata							Animalia	Mollusca	Polyplacophora	Chitonida	Tonicellidae	Tonicella	lineata		species		(Wood, 1815)
	imerss.org:PMLS:7835			Count: few		Andy Lamb								PRESENT				Mopalia hindsii					iNaturalist:51725								Mopalia hindsii							Animalia	Mollusca	Polyplacophora	Chitonida	Mopaliidae	Mopalia	hindsii		species		(Reeve, 1847)
	imerss.org:PMLS:7836			Count: few		Andy Lamb								PRESENT				Mopalia spectabilis					iNaturalist:364026								Mopalia spectabilis							Animalia	Mollusca	Polyplacophora	Chitonida	Mopaliidae	Mopalia	spectabilis		species		I. M. Cowan & G. M. Cowan, 1977
	imerss.org:PMLS:7837			Count: some		Andy Lamb								PRESENT				Cryptochiton stelleri					iNaturalist:49053								Cryptochiton stelleri							Animalia	Mollusca	Polyplacophora	Chitonida	Acanthochitonidae	Cryptochiton	stelleri		species		(Middendorff, 1847)
	imerss.org:PMLS:7838			Count: very many		Andy Lamb								PRESENT				Mytilus edulis complex					iNaturalist:1108240								Mytilus edulis							Animalia	Mollusca	Bivalvia	Mytilida	Mytilidae	Mytilus	edulis		species
	imerss.org:PMLS:7839			Count: few		Andy Lamb								PRESENT				Chlamys hastata					iNaturalist:180013								Chlamys hastata							Animalia	Mollusca	Bivalvia	Pectinida	Pectinidae	Chlamys	hastata		species		(G. B. Sowerby II, 1842)
	imerss.org:PMLS:7840			Count: some		Andy Lamb								PRESENT				Crassadoma gigantea					iNaturalist:54526								Crassadoma gigantea							Animalia	Mollusca	Bivalvia	Pectinida	Pectinidae	Crassadoma	gigantea		species		(J.E. Gray, 1825)
	imerss.org:PMLS:7841			Count: abundant		Andy Lamb								PRESENT				Pododesmus macrochisma					iNaturalist:68652								Pododesmus macrochisma							Animalia	Mollusca	Bivalvia	Pectinida	Anomiidae	Pododesmus	macrochisma		species		(Deshayes, 1839)
	imerss.org:PMLS:7842			Count: few		Andy Lamb								PRESENT				Entodesma navicula					iNaturalist:339164								Entodesma navicula							Animalia	Mollusca	Bivalvia		Lyonsiidae	Entodesma	navicula		species		(Adams & Reeve, 1850)
	imerss.org:PMLS:7843			Count: many		Andy Lamb								PRESENT				Acmaea mitra					iNaturalist:47676								Acmaea mitra							Animalia	Mollusca	Gastropoda		Acmaeidae	Acmaea	mitra		species		Rathke, 1833
	imerss.org:PMLS:7844			Count: few		Andy Lamb								PRESENT				Nucella lamellosa					iNaturalist:117641								Nucella lamellosa							Animalia	Mollusca	Gastropoda	Neogastropoda	Muricidae	Nucella	lamellosa		species		(Gmelin, 1791)
	imerss.org:PMLS:7845			Count: few		Andy Lamb								PRESENT				Nucella canaliculata					iNaturalist:69998								Nucella canaliculata							Animalia	Mollusca	Gastropoda	Neogastropoda	Muricidae	Nucella	canaliculata		species		(Duclos, 1832)
	imerss.org:PMLS:7846			Count: some		Andy Lamb								PRESENT				Ceratostoma foliatum					iNaturalist:116687								Ceratostoma foliatum							Animalia	Mollusca	Gastropoda	Neogastropoda	Muricidae	Ceratostoma	foliatum		species		(Gmelin, 1791)
	imerss.org:PMLS:7847			Count: some		Andy Lamb								PRESENT				Amphissa columbiana					iNaturalist:117643								Amphissa columbiana							Animalia	Mollusca	Gastropoda	Neogastropoda	Columbellidae	Amphissa	columbiana		species		Dall, 1916
	imerss.org:PMLS:7848			Count: some		Andy Lamb								PRESENT				Paciocinebrina lurida					iNaturalist:910800								Paciocinebrina lurida							Animalia	Mollusca	Gastropoda	Neogastropoda	Muricidae	Paciocinebrina	lurida		species		(Middendorff, 1848)
	imerss.org:PMLS:7849			Count: many		Andy Lamb								PRESENT				Calliostoma ligatum					iNaturalist:129920								Calliostoma ligatum							Animalia	Mollusca	Gastropoda	Trochida	Calliostomatidae	Calliostoma	ligatum		species		(Gould, 1849)
	imerss.org:PMLS:7850			Count: many		Andy Lamb								PRESENT				Peltodoris nobilis					iNaturalist:48450								Peltodoris nobilis							Animalia	Mollusca	Gastropoda	Nudibranchia	Discodorididae	Peltodoris	nobilis		species		(MacFarland, 1905)
	imerss.org:PMLS:7851			Count: many		Andy Lamb								PRESENT				Doris montereyensis					iNaturalist:47469								Doris montereyensis							Animalia	Mollusca	Gastropoda	Nudibranchia	Dorididae	Doris	montereyensis		species		J. G. Cooper, 1863
	imerss.org:PMLS:7852			Count: few		Andy Lamb								PRESENT				Cadlina luteomarginata complex					iNaturalist:50146								Cadlina luteomarginata							Animalia	Mollusca	Gastropoda	Nudibranchia	Cadlinidae	Cadlina	luteomarginata		species		MacFarland, 1966
	imerss.org:PMLS:7927			Count: few		Andy Lamb								PRESENT				Mopalia lignosa					iNaturalist:51724								Mopalia lignosa							Animalia	Mollusca	Polyplacophora	Chitonida	Mopaliidae	Mopalia	lignosa		species		(Gould, 1846)
	imerss.org:PMLS:7928			Count: few		Andy Lamb								PRESENT				Mopalia spectabilis					iNaturalist:364026								Mopalia spectabilis							Animalia	Mollusca	Polyplacophora	Chitonida	Mopaliidae	Mopalia	spectabilis		species		I. M. Cowan & G. M. Cowan, 1977
	imerss.org:PMLS:7929			Count: few		Andy Lamb								PRESENT				Lepidozona mertensii					iNaturalist:117621								Lepidozona mertensii							Animalia	Mollusca	Polyplacophora	Chitonida	Ischnochitonidae	Lepidozona	mertensii		species		(Middendorff, 1847)
	imerss.org:PMLS:7930			Count: many		Andy Lamb								PRESENT				Chlamys hastata					iNaturalist:180013								Chlamys hastata							Animalia	Mollusca	Bivalvia	Pectinida	Pectinidae	Chlamys	hastata		species		(G. B. Sowerby II, 1842)
	imerss.org:PMLS:7931			Count: few		Andy Lamb								PRESENT				Crassadoma gigantea					iNaturalist:54526								Crassadoma gigantea							Animalia	Mollusca	Bivalvia	Pectinida	Pectinidae	Crassadoma	gigantea		species		(J.E. Gray, 1825)
	imerss.org:PMLS:7932			Count: few		Andy Lamb								PRESENT				Mytilimeria nuttalli					iNaturalist:873896								Mytilimeria nuttalli							Animalia	Mollusca	Bivalvia		Lyonsiidae	Mytilimeria	nuttalli		species		Conrad, 1837
	imerss.org:PMLS:7933			Count: many		Andy Lamb								PRESENT				Nucella lamellosa					iNaturalist:117641								Nucella lamellosa							Animalia	Mollusca	Gastropoda	Neogastropoda	Muricidae	Nucella	lamellosa		species		(Gmelin, 1791)
	imerss.org:PMLS:7934			Count: many		Andy Lamb								PRESENT				Ceratostoma foliatum					iNaturalist:116687								Ceratostoma foliatum							Animalia	Mollusca	Gastropoda	Neogastropoda	Muricidae	Ceratostoma	foliatum		species		(Gmelin, 1791)
	imerss.org:PMLS:7935			Count: few		Andy Lamb								PRESENT				Amphissa columbiana					iNaturalist:117643								Amphissa columbiana							Animalia	Mollusca	Gastropoda	Neogastropoda	Columbellidae	Amphissa	columbiana		species		Dall, 1916
	imerss.org:PMLS:7936					Andy Lamb		2						PRESENT				Scabrotrophon maltzani					iNaturalist:500269								Scabrotrophon maltzani							Animalia	Mollusca	Gastropoda	Neogastropoda	Muricidae	Scabrotrophon	maltzani		species		(Kobelt, 1878)
	imerss.org:PMLS:7937			Count: few		Andy Lamb								PRESENT				Calliostoma ligatum					iNaturalist:129920								Calliostoma ligatum							Animalia	Mollusca	Gastropoda	Trochida	Calliostomatidae	Calliostoma	ligatum		species		(Gould, 1849)
	imerss.org:PMLS:7938					Andy Lamb		1						PRESENT				Gastropteron pacificum					iNaturalist:49839								Gastropteron pacificum							Animalia	Mollusca	Gastropoda	Cephalaspidea	Gastropteridae	Gastropteron	pacificum		species		Bergh, 1894
	imerss.org:PMLS:7939			Count: few		Andy Lamb								PRESENT				Peltodoris nobilis					iNaturalist:48450								Peltodoris nobilis							Animalia	Mollusca	Gastropoda	Nudibranchia	Discodorididae	Peltodoris	nobilis		species		(MacFarland, 1905)
	imerss.org:PMLS:7940					Andy Lamb		1						PRESENT				Doris odhneri					iNaturalist:124210								Doris odhneri							Animalia	Mollusca	Gastropoda	Nudibranchia	Dorididae	Doris	odhneri		species		MacFarland, 1966
	imerss.org:PMLS:7941					Andy Lamb		1						PRESENT				Diaulula odonoghuei					iNaturalist:508237								Diaulula odonoghuei							Animalia	Mollusca	Gastropoda	Nudibranchia	Discodorididae	Diaulula	odonoghuei		species		(Steinberg, 1963)
	imerss.org:PMLS:7942			Count: some		Andy Lamb								PRESENT				Cadlina luteomarginata complex					iNaturalist:50146								Cadlina luteomarginata							Animalia	Mollusca	Gastropoda	Nudibranchia	Cadlinidae	Cadlina	luteomarginata		species		MacFarland, 1966
	imerss.org:PMLS:7943			Count: few		Andy Lamb								PRESENT				Dirona albolineata					iNaturalist:47477								Dirona albolineata							Animalia	Mollusca	Gastropoda	Nudibranchia	Dironidae	Dirona	albolineata		species		MacFarland, 1905
	imerss.org:PMLS:7944			Count: few		Andy Lamb								PRESENT				Dirona pellucida					iNaturalist:50447								Dirona pellucida							Animalia	Mollusca	Gastropoda	Nudibranchia	Dironidae	Dirona	pellucida		species		Volodchenko, 1941
	imerss.org:PMLS:7945					Andy Lamb		1						PRESENT				Rossia pacifica					iNaturalist:151358								Rossia pacifica							Animalia	Mollusca	Cephalopoda	Sepiida	Sepiolidae	Rossia	pacifica		species		Berry, 1911
	imerss.org:PMLS:8035			Count: some		Andy Lamb								PRESENT				Tonicella lineata					iNaturalist:47425								Tonicella lineata							Animalia	Mollusca	Polyplacophora	Chitonida	Tonicellidae	Tonicella	lineata		species		(Wood, 1815)
	imerss.org:PMLS:8036			Count: few		Andy Lamb								PRESENT				Tonicella insignis					iNaturalist:498132								Tonicella insignis							Animalia	Mollusca	Polyplacophora	Chitonida	Tonicellidae	Tonicella	insignis		species		(Reeve, 1847)
	imerss.org:PMLS:8037			Count: few		Andy Lamb								PRESENT				Lepidozona mertensii					iNaturalist:117621								Lepidozona mertensii							Animalia	Mollusca	Polyplacophora	Chitonida	Ischnochitonidae	Lepidozona	mertensii		species		(Middendorff, 1847)
	imerss.org:PMLS:8038					Andy Lamb		1						PRESENT				Cryptochiton stelleri					iNaturalist:49053								Cryptochiton stelleri							Animalia	Mollusca	Polyplacophora	Chitonida	Acanthochitonidae	Cryptochiton	stelleri		species		(Middendorff, 1847)
	imerss.org:PMLS:8039			Count: some		Andy Lamb								PRESENT				Chlamys hastata					iNaturalist:180013								Chlamys hastata							Animalia	Mollusca	Bivalvia	Pectinida	Pectinidae	Chlamys	hastata		species		(G. B. Sowerby II, 1842)
	imerss.org:PMLS:8040			Count: few		Andy Lamb								PRESENT				Crassadoma gigantea					iNaturalist:54526								Crassadoma gigantea							Animalia	Mollusca	Bivalvia	Pectinida	Pectinidae	Crassadoma	gigantea		species		(J.E. Gray, 1825)
	imerss.org:PMLS:8041			Count: few		Andy Lamb								PRESENT				Mytilimeria nuttalli					iNaturalist:873896								Mytilimeria nuttalli							Animalia	Mollusca	Bivalvia		Lyonsiidae	Mytilimeria	nuttalli		species		Conrad, 1837
	imerss.org:PMLS:8042					Andy Lamb		2						PRESENT				Puncturella cucullata					iNaturalist:904312								Puncturella cucullata							Animalia	Mollusca	Gastropoda	Lepetellida	Fissurellidae	Puncturella	cucullata		species		(Gould, 1846)
	imerss.org:PMLS:8043			Count: some		Andy Lamb								PRESENT				Nucella lamellosa					iNaturalist:117641								Nucella lamellosa							Animalia	Mollusca	Gastropoda	Neogastropoda	Muricidae	Nucella	lamellosa		species		(Gmelin, 1791)
	imerss.org:PMLS:8044			Count: few		Andy Lamb								PRESENT				Ceratostoma foliatum					iNaturalist:116687								Ceratostoma foliatum							Animalia	Mollusca	Gastropoda	Neogastropoda	Muricidae	Ceratostoma	foliatum		species		(Gmelin, 1791)
	imerss.org:PMLS:8045			Count: few		Andy Lamb								PRESENT				Calliostoma ligatum					iNaturalist:129920								Calliostoma ligatum							Animalia	Mollusca	Gastropoda	Trochida	Calliostomatidae	Calliostoma	ligatum		species		(Gould, 1849)
	imerss.org:PMLS:8046			Count: few		Andy Lamb								PRESENT				Doris montereyensis					iNaturalist:47469								Doris montereyensis							Animalia	Mollusca	Gastropoda	Nudibranchia	Dorididae	Doris	montereyensis		species		J. G. Cooper, 1863
	imerss.org:PMLS:8047					Andy Lamb		2						PRESENT				Diaulula odonoghuei					iNaturalist:508237								Diaulula odonoghuei							Animalia	Mollusca	Gastropoda	Nudibranchia	Discodorididae	Diaulula	odonoghuei		species		(Steinberg, 1963)
	imerss.org:PMLS:8048			Count: few		Andy Lamb								PRESENT				Cadlina luteomarginata complex					iNaturalist:50146								Cadlina luteomarginata							Animalia	Mollusca	Gastropoda	Nudibranchia	Cadlinidae	Cadlina	luteomarginata		species		MacFarland, 1966
	imerss.org:PMLS:8049			Count: few		Andy Lamb								PRESENT				Acanthodoris hudsoni					iNaturalist:48447								Acanthodoris hudsoni							Animalia	Mollusca	Gastropoda	Nudibranchia	Onchidorididae	Acanthodoris	hudsoni		species		MacFarland, 1905
	imerss.org:PMLS:8050			Count: few		Andy Lamb								PRESENT				Dirona pellucida					iNaturalist:50447								Dirona pellucida							Animalia	Mollusca	Gastropoda	Nudibranchia	Dironidae	Dirona	pellucida		species		Volodchenko, 1941
	imerss.org:PMLS:8130			Count: some		Andy Lamb								PRESENT				Tonicella lineata					iNaturalist:47425								Tonicella lineata							Animalia	Mollusca	Polyplacophora	Chitonida	Tonicellidae	Tonicella	lineata		species		(Wood, 1815)
	imerss.org:PMLS:8131			Count: few		Andy Lamb								PRESENT				Crassadoma gigantea					iNaturalist:54526								Crassadoma gigantea							Animalia	Mollusca	Bivalvia	Pectinida	Pectinidae	Crassadoma	gigantea		species		(J.E. Gray, 1825)
	imerss.org:PMLS:8132			Count: few		Andy Lamb								PRESENT				Gari californica					iNaturalist:354323								Gari californica							Animalia	Mollusca	Bivalvia	Cardiida	Psammobiidae	Gari	californica		species		(Conrad, 1849)
	imerss.org:PMLS:8133			Count: many		Andy Lamb								PRESENT				Humilaria kennerleyi					iNaturalist:873901								Humilaria kennerleyi							Animalia	Mollusca	Bivalvia	Venerida	Veneridae	Humilaria	kennerleyi		species		(Reeve, 1863)
	imerss.org:PMLS:8134			Count: few		Andy Lamb								PRESENT				Cadlina luteomarginata complex					iNaturalist:50146								Cadlina luteomarginata							Animalia	Mollusca	Gastropoda	Nudibranchia	Cadlinidae	Cadlina	luteomarginata		species		MacFarland, 1966
	imerss.org:PMLS:8135			Count: few		Andy Lamb								PRESENT				Acanthodoris hudsoni					iNaturalist:48447								Acanthodoris hudsoni							Animalia	Mollusca	Gastropoda	Nudibranchia	Onchidorididae	Acanthodoris	hudsoni		species		MacFarland, 1905
	imerss.org:PMLS:8136			Count: few		Andy Lamb								PRESENT				Aldisa cooperi					iNaturalist:50097								Aldisa cooperi							Animalia	Mollusca	Gastropoda	Nudibranchia	Cadlinidae	Aldisa	cooperi		species		Robilliard & Baba, 1972
	imerss.org:PMLS:8227			Count: some		Andy Lamb								PRESENT				Tonicella lineata					iNaturalist:47425								Tonicella lineata							Animalia	Mollusca	Polyplacophora	Chitonida	Tonicellidae	Tonicella	lineata		species		(Wood, 1815)
	imerss.org:PMLS:8228			Count: few		Andy Lamb								PRESENT				Mopalia lignosa					iNaturalist:51724								Mopalia lignosa							Animalia	Mollusca	Polyplacophora	Chitonida	Mopaliidae	Mopalia	lignosa		species		(Gould, 1846)
	imerss.org:PMLS:8229					Andy Lamb		1						PRESENT				Cryptochiton stelleri					iNaturalist:49053								Cryptochiton stelleri							Animalia	Mollusca	Polyplacophora	Chitonida	Acanthochitonidae	Cryptochiton	stelleri		species		(Middendorff, 1847)
	imerss.org:PMLS:8230			Count: few		Andy Lamb								PRESENT				Chlamys hastata					iNaturalist:180013								Chlamys hastata							Animalia	Mollusca	Bivalvia	Pectinida	Pectinidae	Chlamys	hastata		species		(G. B. Sowerby II, 1842)
	imerss.org:PMLS:8231			Count: few		Andy Lamb								PRESENT				Crassadoma gigantea					iNaturalist:54526								Crassadoma gigantea							Animalia	Mollusca	Bivalvia	Pectinida	Pectinidae	Crassadoma	gigantea		species		(J.E. Gray, 1825)
	imerss.org:PMLS:8232			Count: few		Andy Lamb								PRESENT				Gari californica					iNaturalist:354323								Gari californica							Animalia	Mollusca	Bivalvia	Cardiida	Psammobiidae	Gari	californica		species		(Conrad, 1849)
	imerss.org:PMLS:8233			Count: some		Andy Lamb								PRESENT				Humilaria kennerleyi					iNaturalist:873901								Humilaria kennerleyi							Animalia	Mollusca	Bivalvia	Venerida	Veneridae	Humilaria	kennerleyi		species		(Reeve, 1863)
	imerss.org:PMLS:8234			Count: few		Andy Lamb								PRESENT				Acmaea mitra					iNaturalist:47676								Acmaea mitra							Animalia	Mollusca	Gastropoda		Acmaeidae	Acmaea	mitra		species		Rathke, 1833
	imerss.org:PMLS:8235			Count: few		Andy Lamb								PRESENT				Diodora aspera					iNaturalist:64148								Diodora aspera							Animalia	Mollusca	Gastropoda	Lepetellida	Fissurellidae	Diodora	aspera		species		(Rathke, 1833)
	imerss.org:PMLS:8236					Andy Lamb		1						PRESENT				Haliotis kamtschatkana					iNaturalist:56654								Haliotis kamtschatkana							Animalia	Mollusca	Gastropoda	Lepetellida	Haliotidae	Haliotis	kamtschatkana		species		Jonas, 1845
	imerss.org:PMLS:8237			Count: few		Andy Lamb								PRESENT				Ceratostoma foliatum					iNaturalist:116687								Ceratostoma foliatum							Animalia	Mollusca	Gastropoda	Neogastropoda	Muricidae	Ceratostoma	foliatum		species		(Gmelin, 1791)
	imerss.org:PMLS:8238			Count: few		Andy Lamb								PRESENT				Peltodoris nobilis					iNaturalist:48450								Peltodoris nobilis							Animalia	Mollusca	Gastropoda	Nudibranchia	Discodorididae	Peltodoris	nobilis		species		(MacFarland, 1905)
	imerss.org:PMLS:8239			Count: few		Andy Lamb								PRESENT				Cadlina luteomarginata complex					iNaturalist:50146								Cadlina luteomarginata							Animalia	Mollusca	Gastropoda	Nudibranchia	Cadlinidae	Cadlina	luteomarginata		species		MacFarland, 1966
	imerss.org:PMLS:8314			Count: some		Andy Lamb								PRESENT				Tonicella lineata					iNaturalist:47425								Tonicella lineata							Animalia	Mollusca	Polyplacophora	Chitonida	Tonicellidae	Tonicella	lineata		species		(Wood, 1815)
	imerss.org:PMLS:8315					Andy Lamb		1						PRESENT				Cryptochiton stelleri					iNaturalist:49053								Cryptochiton stelleri							Animalia	Mollusca	Polyplacophora	Chitonida	Acanthochitonidae	Cryptochiton	stelleri		species		(Middendorff, 1847)
	imerss.org:PMLS:8316			Count: some		Andy Lamb								PRESENT				Chlamys hastata					iNaturalist:180013								Chlamys hastata							Animalia	Mollusca	Bivalvia	Pectinida	Pectinidae	Chlamys	hastata		species		(G. B. Sowerby II, 1842)
	imerss.org:PMLS:8317			Count: some		Andy Lamb								PRESENT				Crassadoma gigantea					iNaturalist:54526								Crassadoma gigantea							Animalia	Mollusca	Bivalvia	Pectinida	Pectinidae	Crassadoma	gigantea		species		(J.E. Gray, 1825)
	imerss.org:PMLS:8318			Count: few		Andy Lamb								PRESENT				Entodesma navicula					iNaturalist:339164								Entodesma navicula							Animalia	Mollusca	Bivalvia		Lyonsiidae	Entodesma	navicula		species		(Adams & Reeve, 1850)
	imerss.org:PMLS:8319			Count: few		Andy Lamb								PRESENT				Diodora aspera					iNaturalist:64148								Diodora aspera							Animalia	Mollusca	Gastropoda	Lepetellida	Fissurellidae	Diodora	aspera		species		(Rathke, 1833)
	imerss.org:PMLS:8320			Count: some		Andy Lamb								PRESENT				Calliostoma ligatum					iNaturalist:129920								Calliostoma ligatum							Animalia	Mollusca	Gastropoda	Trochida	Calliostomatidae	Calliostoma	ligatum		species		(Gould, 1849)
	imerss.org:PMLS:8321			Count: few		Andy Lamb								PRESENT				Cadlina luteomarginata complex					iNaturalist:50146								Cadlina luteomarginata							Animalia	Mollusca	Gastropoda	Nudibranchia	Cadlinidae	Cadlina	luteomarginata		species		MacFarland, 1966
	imerss.org:PMLS:8322					Andy Lamb		1						PRESENT				Tochuina gigantea					iNaturalist:873733								Tochuina gigantea							Animalia	Mollusca	Gastropoda	Nudibranchia	Tritoniidae	Tochuina	gigantea		species		(Bergh, 1904)
	imerss.org:PMLS:8323			Count: few		Andy Lamb								PRESENT				Dendronotus rufus					iNaturalist:50393								Dendronotus rufus							Animalia	Mollusca	Gastropoda	Nudibranchia	Dendronotidae	Dendronotus	rufus		species		O'Donoghue, 1921
	imerss.org:PMLS:8324			Count: some		Andy Lamb								PRESENT				Orienthella trilineata					iNaturalist:764704								Orienthella trilineata							Animalia	Mollusca	Gastropoda	Nudibranchia	Coryphellidae	Orienthella	trilineata		species		(O'Donoghue, 1921)
	imerss.org:PMLS:8393			Count: some		Andy Lamb								PRESENT				Tonicella lineata					iNaturalist:47425								Tonicella lineata							Animalia	Mollusca	Polyplacophora	Chitonida	Tonicellidae	Tonicella	lineata		species		(Wood, 1815)
	imerss.org:PMLS:8394					Andy Lamb		1						PRESENT				Mopalia lignosa					iNaturalist:51724								Mopalia lignosa							Animalia	Mollusca	Polyplacophora	Chitonida	Mopaliidae	Mopalia	lignosa		species		(Gould, 1846)
	imerss.org:PMLS:8395			Count: few		Andy Lamb								PRESENT				Chlamys hastata					iNaturalist:180013								Chlamys hastata							Animalia	Mollusca	Bivalvia	Pectinida	Pectinidae	Chlamys	hastata		species		(G. B. Sowerby II, 1842)
	imerss.org:PMLS:8396			Count: few		Andy Lamb								PRESENT				Crassadoma gigantea					iNaturalist:54526								Crassadoma gigantea							Animalia	Mollusca	Bivalvia	Pectinida	Pectinidae	Crassadoma	gigantea		species		(J.E. Gray, 1825)
	imerss.org:PMLS:8397			Count: few		Andy Lamb								PRESENT				Gari californica					iNaturalist:354323								Gari californica							Animalia	Mollusca	Bivalvia	Cardiida	Psammobiidae	Gari	californica		species		(Conrad, 1849)
	imerss.org:PMLS:8398					Andy Lamb		1						PRESENT				Semele rubropicta					iNaturalist:371110								Semele rubropicta							Animalia	Mollusca	Bivalvia	Cardiida	Semelidae	Semele	rubropicta		species		Dall, 1871
[truncated: 2,857 more rows]
[truncated: 105 more columns]

## Sheet: ExternalLinks
Taxon_Local_ID	Link type	Link
