# Supplementary material for: Toward an atlas of Salish Sea biodiversity: the flora and fauna of Galiano Island, British Columbia, Canada. Part I. Marine zoology
Source: Biodivers Data J. 2022 Mar 10;10:e76050. doi: 10.3897/BDJ.10.e76050 (PMC8930920; doi:10.3897/BDJ.10.e76050)
Supplement: Supplementary material 9 — Annelida of Galiano Island, British Columbia, Canada [file bdj-10-e76050-s009.xlsx]

## Sheet: Taxa
Taxon_Local_ID	Kingdom	Subkingdom	Phylum	Subphylum	Superclass	Class	Subclass	Superorder	Order	Suborder	Infraorder	Superfamily	Family	Subfamily	Tribe	Subtribe	Genus	Subgenus	Species	Subspecies	Variety	Form	Authorship	Nomenclature	Feeds on	symbioticWith	parasiteOf	Host of	Native Status	Conservation Status	Distribution	Horizon	Notes
957352	Animalia		Annelida			Clitellata	Oligochaeta		Tubificida	Tubificina			Naididae	Limnodriloidinae			Limnodriloides		victoriensis				Brinkhurst & Baker, 1979
957359	Animalia		Annelida			Clitellata	Oligochaeta		Tubificida	Tubificina			Naididae	Phallodrilinae			Bathydrilus		litoreus				Baker, 1983
339286	Animalia		Annelida			Polychaeta	Errantia		Eunicida				Onuphidae	Onuphinae			Diopatra		ornata				Moore, 1911
194976	Animalia		Annelida			Polychaeta	Errantia		Phyllodocida				Tomopteridae				Tomopteris		sp.
733687	Animalia		Annelida			Polychaeta	Errantia		Phyllodocida	Aphroditiformia			Aphroditidae				Aphrodita		negligens				Moore, 1905										Described from Japan; may not be present in the NEP.
69914	Animalia		Annelida			Polychaeta	Errantia		Phyllodocida	Aphroditiformia			Polynoidae	Arctonoinae			Arctonoe		fragilis				(Baird, 1863)
465156	Animalia		Annelida			Polychaeta	Errantia		Phyllodocida	Aphroditiformia			Polynoidae	Arctonoinae			Arctonoe		pulchra				(Johnson, 1897)
122163	Animalia		Annelida			Polychaeta	Errantia		Phyllodocida	Aphroditiformia			Polynoidae	Arctonoinae			Arctonoe		vittata				(Grube, 1855)
71236	Animalia		Annelida			Polychaeta	Errantia		Phyllodocida	Aphroditiformia			Polynoidae	Lepidonotinae			Halosydna		brevisetosa				Kinberg, 1856
873903	Animalia		Annelida			Polychaeta	Errantia		Phyllodocida	Aphroditiformia			Polynoidae	Polynoinae			Harmothoe		fragilis				Moore, 1910
494514	Animalia		Annelida			Polychaeta	Errantia		Phyllodocida	Nereidiformia			Hesionidae	Ophiodrominae	Ophiodromini		Oxydromus		pugettensis				(Johnson, 1901)
1115984	Animalia		Annelida			Polychaeta	Errantia		Phyllodocida	Nereidiformia			Nereididae	Nereidinae			Alitta		williami				Villalobos-Guerrero & Bakken, 2018
347330	Animalia		Annelida			Polychaeta	Errantia		Phyllodocida	Nereidiformia			Nereididae	Nereidinae			Nereis		cf zonata														Specimens from the NEP are likely to be mis-identified as this name is a holdover from when European literature dominated polychaete systematics. Northern European specimens have a distinct color pattern similar to our Cheilonereis cyclurus, which is very different from NEP worms identified as N. zonata.
81791	Animalia		Annelida			Polychaeta	Errantia		Phyllodocida	Nereidiformia			Nereididae	Nereidinae			Nereis		sp.
81790	Animalia		Annelida			Polychaeta	Errantia		Phyllodocida	Nereidiformia			Nereididae	Nereidinae			Nereis		vexillosa				Grube, 1851
129876	Animalia		Annelida			Polychaeta	Errantia		Phyllodocida	Nereidiformia			Nereididae	Nereidinae			Platynereis		bicanaliculata				(Baird, 1863)
1136117	Animalia		Annelida			Polychaeta	Errantia		Phyllodocida	Nereidiformia			Syllidae	Autolytinae	Autolytini		Epigamia		cf alexandri														Epigamia alexandri (Malmgren, 1867) describes a European species that is likely not present. What is known to be present is Epigamia magna.
1136121	Animalia		Annelida			Polychaeta	Errantia		Phyllodocida	Nereidiformia			Syllidae	Syllinae			Trypanedenta		gemmipara				(Johnson, 1901)
195014	Animalia		Annelida			Polychaeta	Errantia		Phyllodocida	Nereidiformia			Syllidae	Syllinae			Trypanosyllis		sp.
347275	Animalia		Annelida			Polychaeta	Errantia		Phyllodocida	Phyllodociformia			Phyllodocidae	Eteoninae			Eulalia		sp.
216631	Animalia		Annelida			Polychaeta	Sedentaria						Chaetopteridae				Chaetopterus		variopedatus complex														More research is required to determine which species of Chaetopterus is present in the region.
467241	Animalia		Annelida			Polychaeta	Sedentaria						Chaetopteridae				Phyllochaetopterus		prolifica				Potts, 1914
374226	Animalia		Annelida			Polychaeta	Sedentaria						Chaetopteridae				Phyllochaetopterus		sp.
130236	Animalia		Annelida			Polychaeta	Sedentaria						Chaetopteridae				Spiochaetopterus		costarum				(Claparède, 1869)										Reported as Spiochaetopterus costarum pottsi (Berkeley, 1927), an unaccepted infrataxon (WoRMS Editorial Board 2021).
339237	Animalia		Annelida			Polychaeta	Sedentaria						Sabellariidae				Neosabellaria		cementarium				(Moore, 1906)
1199401	Animalia		Annelida			Polychaeta	Sedentaria		Sabellida				Sabellidae	Sabellinae			Bispira		pacifica				(Berkeley & Berkeley, 1954)
356415	Animalia		Annelida			Polychaeta	Sedentaria		Sabellida				Sabellidae	Sabellinae			Chone		aurantiaca				(Johnson, 1901)
84864	Animalia		Annelida			Polychaeta	Sedentaria		Sabellida				Sabellidae	Sabellinae			Eudistylia		vancouveri				(Kinberg, 1866)
492594	Animalia		Annelida			Polychaeta	Sedentaria		Sabellida				Sabellidae	Sabellinae			Myxicola		aff.	aesthetica													(Myxicola sp.A sensu Leslie Harris, provisional name); In Europe, M. aesthetica is found on docks & hard-surfaces. However, specimens from the NEP that exhibit this habit are morphologically and genetically different. In the past, several species of Myxicola were described from California, Puget Sound, and Alaska. This material needs to be re-examined.
49533	Animalia		Annelida			Polychaeta	Sedentaria		Sabellida				Sabellidae	Sabellinae			Myxicola		aff.	infundibulum													(Myxicola sp.B sensu Leslie Harris, provisional name); In Europe, M. infundibulum is found in soft-sediments. However, specimens from the NEP that exhibit this habit are morphologically and genetically different. In the past, several species of Myxicola were described from California, Puget Sound, and Alaska. This material needs to be re-examined.
367054	Animalia		Annelida			Polychaeta	Sedentaria		Sabellida				Sabellidae	Sabellinae			Parasabella		media				Bush, 1905
485471	Animalia		Annelida			Polychaeta	Sedentaria		Sabellida				Sabellidae	Sabellinae			Pseudopotamilla		occelata				Moore, 1905
339561	Animalia		Annelida			Polychaeta	Sedentaria		Sabellida				Sabellidae	Sabellinae			Schizobranchia		insignis				Bush, 1905
939557	Animalia		Annelida			Polychaeta	Sedentaria		Sabellida				Serpulidae				Apomatus		geniculatus				(Moore & Bush, 1904)
543574	Animalia		Annelida			Polychaeta	Sedentaria		Sabellida				Serpulidae				Crucigera		zygophora				(Johnson, 1901)
538108	Animalia		Annelida			Polychaeta	Sedentaria		Sabellida				Serpulidae				Protula		pacifica				Pixell, 1912
538107	Animalia		Annelida			Polychaeta	Sedentaria		Sabellida				Serpulidae				Pseudochitinopoma		occidentalis				(Bush, 1905)
194972	Animalia		Annelida			Polychaeta	Sedentaria		Sabellida				Serpulidae				Salmacina		tribranchiata				(Moore, 1923)
131207	Animalia		Annelida			Polychaeta	Sedentaria		Sabellida				Serpulidae				Serpula		columbiana				Johnson, 1901										Listed in older references as Serpula vermicularis which is a valid species but now restricted in range to Europe.
533325	Animalia		Annelida			Polychaeta	Sedentaria		Sabellida				Serpulidae	Spirorbinae	Pileolariini		Pileolaria		spp.
1136116	Animalia		Annelida			Polychaeta	Sedentaria		Terebellida	Cirratuliformia			Cirratulidae				Cirratulus		spectabilis				(Kinberg, 1866)
464813	Animalia		Annelida			Polychaeta	Sedentaria		Terebellida	Cirratuliformia			Cirratulidae				Dodecaceria		concharum				Örsted, 1843										Dodecaceria concharum is a European species which may not be present in the NEP; molecular analysis is required to confirm.
192656	Animalia		Annelida			Polychaeta	Sedentaria		Terebellida	Cirratuliformia			Cirratulidae				Dodecaceria		fewkesi				Berkeley & Berkeley, 1954										Dodecaceria fewkesi creates its own calcareous tube while D. concharum burrows into calcareous substrates.
1136118	Animalia		Annelida			Polychaeta	Sedentaria		Terebellida	Terebellomorpha			Terebellidae	Terebellinae			Neoleprea		spiralis				(Johnson, 1901)
338339	Animalia		Annelida			Polychaeta	Sedentaria		Terebellida	Terebellomorpha			Terebellidae	Terebellinae			Pista		elongata				Moore, 1909
117588	Animalia		Annelida			Polychaeta	Sedentaria		Terebellida	Terebellomorpha			Terebellidae	Thelepodinae			Thelepus		spp.

## Sheet: Materials
typeStatus	occurrenceID	catalogNumber	occurrenceDetails	occurrenceRemarks	recordNumber	recordedBy	individualID	individualCount	sex	lifeStage	reproductiveCondition	behavior	establishmentMeans	occurrenceStatus	preparations	disposition	otherCatalogNumbers	previousIdentifications	associatedMedia	associatedReferences	associatedOccurrences	associatedSequences	taxonID	scientificNameID	acceptedNameUsageID	parentNameUsageID	originalNameUsageID	nameAccordingToID	namePublishedInID	taxonConceptID	scientificName	acceptedNameUsage	parentNameUsage	originalNameUsage	nameAccordingTo	namePublishedIn	higherClassification	kingdom	phylum	class	order	family	genus	specificEpithet	infraspecificEpithet	taxonRank	verbatimTaxonRank	scientificNameAuthorship	vernacularName
	imerss.org:PMLS:16					Andy Lamb								PRESENT				Serpula columbiana					iNaturalist:131207								Serpula columbiana							Animalia	Annelida	Polychaeta	Sabellida	Serpulidae	Serpula	columbiana		species		Johnson, 1901
	imerss.org:PMLS:17					Andy Lamb								PRESENT				Dodecaceria fewkesi					iNaturalist:192656								Dodecaceria fewkesi							Animalia	Annelida	Polychaeta	Terebellida	Cirratulidae	Dodecaceria	fewkesi		species		Berkeley & Berkeley, 1954
	imerss.org:PMLS:18					Andy Lamb								PRESENT				Eudistylia vancouveri					iNaturalist:84864								Eudistylia vancouveri							Animalia	Annelida	Polychaeta	Sabellida	Sabellidae	Eudistylia	vancouveri		species		(Kinberg, 1866)
	imerss.org:PMLS:19					Andy Lamb								PRESENT				Schizobranchia insignis					iNaturalist:339561								Schizobranchia insignis							Animalia	Annelida	Polychaeta	Sabellida	Sabellidae	Schizobranchia	insignis		species		Bush, 1905
	imerss.org:PMLS:62					Andy Lamb								PRESENT				Halosydna brevisetosa					iNaturalist:71236								Halosydna brevisetosa							Animalia	Annelida	Polychaeta	Phyllodocida	Polynoidae	Halosydna	brevisetosa		species		Kinberg, 1856
	imerss.org:PMLS:63					Andy Lamb								PRESENT				Nereis spp.					iNaturalist:81791								Nereis							Animalia	Annelida	Polychaeta	Phyllodocida	Nereididae	Nereis			genus
	imerss.org:PMLS:64					Andy Lamb								PRESENT				Serpula columbiana					iNaturalist:131207								Serpula columbiana							Animalia	Annelida	Polychaeta	Sabellida	Serpulidae	Serpula	columbiana		species		Johnson, 1901
	imerss.org:PMLS:65					Andy Lamb								PRESENT				Eudistylia vancouveri					iNaturalist:84864								Eudistylia vancouveri							Animalia	Annelida	Polychaeta	Sabellida	Sabellidae	Eudistylia	vancouveri		species		(Kinberg, 1866)
	imerss.org:PMLS:66					Andy Lamb								PRESENT				Schizobranchia insignis					iNaturalist:339561								Schizobranchia insignis							Animalia	Annelida	Polychaeta	Sabellida	Sabellidae	Schizobranchia	insignis		species		Bush, 1905
	imerss.org:PMLS:146					Andy Lamb								PRESENT				Serpula columbiana					iNaturalist:131207								Serpula columbiana							Animalia	Annelida	Polychaeta	Sabellida	Serpulidae	Serpula	columbiana		species		Johnson, 1901
	imerss.org:PMLS:147					Andy Lamb								PRESENT				Dodecaceria fewkesi					iNaturalist:192656								Dodecaceria fewkesi							Animalia	Annelida	Polychaeta	Terebellida	Cirratulidae	Dodecaceria	fewkesi		species		Berkeley & Berkeley, 1954
	imerss.org:PMLS:148					Andy Lamb								PRESENT				Bispira pacifica					iNaturalist:1199401								Bispira pacifica							Animalia	Annelida	Polychaeta	Sabellida	Sabellidae	Bispira	pacifica		species		(Berkeley & Berkeley, 1954)
	imerss.org:PMLS:197					Andy Lamb								PRESENT				Bispira pacifica					iNaturalist:1199401								Bispira pacifica							Animalia	Annelida	Polychaeta	Sabellida	Sabellidae	Bispira	pacifica		species		(Berkeley & Berkeley, 1954)
	imerss.org:PMLS:241					Andy Lamb								PRESENT				Protula pacifica					iNaturalist:538108								Protula pacifica							Animalia	Annelida	Polychaeta	Sabellida	Serpulidae	Protula	pacifica		species		Pixell, 1912
	imerss.org:PMLS:242					Andy Lamb								PRESENT				Serpula columbiana					iNaturalist:131207								Serpula columbiana							Animalia	Annelida	Polychaeta	Sabellida	Serpulidae	Serpula	columbiana		species		Johnson, 1901
	imerss.org:PMLS:243					Andy Lamb								PRESENT				Dodecaceria fewkesi					iNaturalist:192656								Dodecaceria fewkesi							Animalia	Annelida	Polychaeta	Terebellida	Cirratulidae	Dodecaceria	fewkesi		species		Berkeley & Berkeley, 1954
	imerss.org:PMLS:244					Andy Lamb								PRESENT				Bispira pacifica					iNaturalist:1199401								Bispira pacifica							Animalia	Annelida	Polychaeta	Sabellida	Sabellidae	Bispira	pacifica		species		(Berkeley & Berkeley, 1954)
	imerss.org:PMLS:295					Andy Lamb								PRESENT				Serpula columbiana					iNaturalist:131207								Serpula columbiana							Animalia	Annelida	Polychaeta	Sabellida	Serpulidae	Serpula	columbiana		species		Johnson, 1901
	imerss.org:PMLS:296			Count: abundant		Andy Lamb								PRESENT				Dodecaceria fewkesi					iNaturalist:192656								Dodecaceria fewkesi							Animalia	Annelida	Polychaeta	Terebellida	Cirratulidae	Dodecaceria	fewkesi		species		Berkeley & Berkeley, 1954
	imerss.org:PMLS:297					Andy Lamb		1						PRESENT				Eudistylia vancouveri					iNaturalist:84864								Eudistylia vancouveri							Animalia	Annelida	Polychaeta	Sabellida	Sabellidae	Eudistylia	vancouveri		species		(Kinberg, 1866)
	imerss.org:PMLS:391					Andy Lamb								PRESENT				Trypanosyllis sp.					iNaturalist:195014								Trypanosyllis							Animalia	Annelida	Polychaeta	Phyllodocida	Syllidae	Trypanosyllis			genus
	imerss.org:PMLS:392			Count: abundant		Andy Lamb								PRESENT				Serpula columbiana					iNaturalist:131207								Serpula columbiana							Animalia	Annelida	Polychaeta	Sabellida	Serpulidae	Serpula	columbiana		species		Johnson, 1901
	imerss.org:PMLS:393			Count: few		Andy Lamb								PRESENT				Dodecaceria fewkesi					iNaturalist:192656								Dodecaceria fewkesi							Animalia	Annelida	Polychaeta	Terebellida	Cirratulidae	Dodecaceria	fewkesi		species		Berkeley & Berkeley, 1954
	imerss.org:PMLS:394					Andy Lamb								PRESENT				Thelepus spp.					iNaturalist:117588								Thelepus							Animalia	Annelida	Polychaeta	Terebellida	Terebellidae	Thelepus			genus
	imerss.org:PMLS:482			Count: abundant		Andy Lamb								PRESENT				Serpula columbiana					iNaturalist:131207								Serpula columbiana							Animalia	Annelida	Polychaeta	Sabellida	Serpulidae	Serpula	columbiana		species		Johnson, 1901
	imerss.org:PMLS:483			Count: abundant		Andy Lamb								PRESENT				Dodecaceria fewkesi					iNaturalist:192656								Dodecaceria fewkesi							Animalia	Annelida	Polychaeta	Terebellida	Cirratulidae	Dodecaceria	fewkesi		species		Berkeley & Berkeley, 1954
	imerss.org:PMLS:563			Count: some		Andy Lamb								PRESENT				Protula pacifica					iNaturalist:538108								Protula pacifica							Animalia	Annelida	Polychaeta	Sabellida	Serpulidae	Protula	pacifica		species		Pixell, 1912
	imerss.org:PMLS:564			Count: many		Andy Lamb								PRESENT				Serpula columbiana					iNaturalist:131207								Serpula columbiana							Animalia	Annelida	Polychaeta	Sabellida	Serpulidae	Serpula	columbiana		species		Johnson, 1901
	imerss.org:PMLS:565			Count: very abundant		Andy Lamb								PRESENT				Dodecaceria fewkesi					iNaturalist:192656								Dodecaceria fewkesi							Animalia	Annelida	Polychaeta	Terebellida	Cirratulidae	Dodecaceria	fewkesi		species		Berkeley & Berkeley, 1954
	imerss.org:PMLS:566			Count: some		Andy Lamb								PRESENT				Thelepus spp.					iNaturalist:117588								Thelepus							Animalia	Annelida	Polychaeta	Terebellida	Terebellidae	Thelepus			genus
	imerss.org:PMLS:567					Andy Lamb								PRESENT				Spiochaetopterus costarum pottsi					iNaturalist:130236								Spiochaetopterus costarum							Animalia	Annelida	Polychaeta		Chaetopteridae	Spiochaetopterus	costarum		species		(Claparède, 1869)
	imerss.org:PMLS:632					Charlie Gibbs								PRESENT				Protula pacifica					iNaturalist:538108								Protula pacifica							Animalia	Annelida	Polychaeta	Sabellida	Serpulidae	Protula	pacifica		species		Pixell, 1912
	imerss.org:PMLS:633					Charlie Gibbs								PRESENT				Serpula columbiana					iNaturalist:131207								Serpula columbiana							Animalia	Annelida	Polychaeta	Sabellida	Serpulidae	Serpula	columbiana		species		Johnson, 1901
	imerss.org:PMLS:634					Charlie Gibbs								PRESENT				Dodecaceria fewkesi					iNaturalist:192656								Dodecaceria fewkesi							Animalia	Annelida	Polychaeta	Terebellida	Cirratulidae	Dodecaceria	fewkesi		species		Berkeley & Berkeley, 1954
	imerss.org:PMLS:635					Charlie Gibbs								PRESENT				Eudistylia vancouveri					iNaturalist:84864								Eudistylia vancouveri							Animalia	Annelida	Polychaeta	Sabellida	Sabellidae	Eudistylia	vancouveri		species		(Kinberg, 1866)
	imerss.org:PMLS:636					Charlie Gibbs								PRESENT				Myxicola sp.B					iNaturalist:49533								Myxicola infundibulum							Animalia	Annelida	Polychaeta	Sabellida	Sabellidae	Myxicola	infundibulum		species
	imerss.org:PMLS:637					Charlie Gibbs								PRESENT				Thelepus spp.					iNaturalist:117588								Thelepus							Animalia	Annelida	Polychaeta	Terebellida	Terebellidae	Thelepus			genus
	imerss.org:PMLS:638					Charlie Gibbs								PRESENT				Spiochaetopterus costarum pottsi					iNaturalist:130236								Spiochaetopterus costarum							Animalia	Annelida	Polychaeta		Chaetopteridae	Spiochaetopterus	costarum		species		(Claparède, 1869)
	imerss.org:PMLS:710			Count: many		Andy Lamb								PRESENT				Dodecaceria fewkesi					iNaturalist:192656								Dodecaceria fewkesi							Animalia	Annelida	Polychaeta	Terebellida	Cirratulidae	Dodecaceria	fewkesi		species		Berkeley & Berkeley, 1954
	imerss.org:PMLS:711			Count: few		Andy Lamb								PRESENT				Pista elongata					iNaturalist:338339								Pista elongata							Animalia	Annelida	Polychaeta	Terebellida	Terebellidae	Pista	elongata		species		Moore, 1909
	imerss.org:PMLS:712			Count: many		Andy Lamb								PRESENT				Serpula columbiana					iNaturalist:131207								Serpula columbiana							Animalia	Annelida	Polychaeta	Sabellida	Serpulidae	Serpula	columbiana		species		Johnson, 1901
	imerss.org:PMLS:791					Charlie Gibbs								PRESENT				Dodecaceria fewkesi					iNaturalist:192656								Dodecaceria fewkesi							Animalia	Annelida	Polychaeta	Terebellida	Cirratulidae	Dodecaceria	fewkesi		species		Berkeley & Berkeley, 1954
	imerss.org:PMLS:792					Charlie Gibbs								PRESENT				Thelepus spp.					iNaturalist:117588								Thelepus							Animalia	Annelida	Polychaeta	Terebellida	Terebellidae	Thelepus			genus
	imerss.org:PMLS:793					Charlie Gibbs								PRESENT				Serpula columbiana					iNaturalist:131207								Serpula columbiana							Animalia	Annelida	Polychaeta	Sabellida	Serpulidae	Serpula	columbiana		species		Johnson, 1901
	imerss.org:PMLS:861					Charlie Gibbs								PRESENT				Serpula columbiana					iNaturalist:131207								Serpula columbiana							Animalia	Annelida	Polychaeta	Sabellida	Serpulidae	Serpula	columbiana		species		Johnson, 1901
	imerss.org:PMLS:862					Charlie Gibbs								PRESENT				Dodecaceria fewkesi					iNaturalist:192656								Dodecaceria fewkesi							Animalia	Annelida	Polychaeta	Terebellida	Cirratulidae	Dodecaceria	fewkesi		species		Berkeley & Berkeley, 1954
	imerss.org:PMLS:863					Charlie Gibbs								PRESENT				Eudistylia vancouveri					iNaturalist:84864								Eudistylia vancouveri							Animalia	Annelida	Polychaeta	Sabellida	Sabellidae	Eudistylia	vancouveri		species		(Kinberg, 1866)
	imerss.org:PMLS:864					Charlie Gibbs								PRESENT				Spiochaetopterus costarum pottsi					iNaturalist:130236								Spiochaetopterus costarum							Animalia	Annelida	Polychaeta		Chaetopteridae	Spiochaetopterus	costarum		species		(Claparède, 1869)
	imerss.org:PMLS:933					Charlie Gibbs								PRESENT				Serpula columbiana					iNaturalist:131207								Serpula columbiana							Animalia	Annelida	Polychaeta	Sabellida	Serpulidae	Serpula	columbiana		species		Johnson, 1901
	imerss.org:PMLS:934					Charlie Gibbs								PRESENT				Dodecaceria fewkesi					iNaturalist:192656								Dodecaceria fewkesi							Animalia	Annelida	Polychaeta	Terebellida	Cirratulidae	Dodecaceria	fewkesi		species		Berkeley & Berkeley, 1954
	imerss.org:PMLS:935					Charlie Gibbs								PRESENT				Eudistylia vancouveri					iNaturalist:84864								Eudistylia vancouveri							Animalia	Annelida	Polychaeta	Sabellida	Sabellidae	Eudistylia	vancouveri		species		(Kinberg, 1866)
	imerss.org:PMLS:1020			Count: many		Andy Lamb								PRESENT				Serpula columbiana					iNaturalist:131207								Serpula columbiana							Animalia	Annelida	Polychaeta	Sabellida	Serpulidae	Serpula	columbiana		species		Johnson, 1901
	imerss.org:PMLS:1021			Count: abundant		Andy Lamb								PRESENT				Dodecaceria fewkesi					iNaturalist:192656								Dodecaceria fewkesi							Animalia	Annelida	Polychaeta	Terebellida	Cirratulidae	Dodecaceria	fewkesi		species		Berkeley & Berkeley, 1954
	imerss.org:PMLS:1022					Andy Lamb								PRESENT				Parasabella media					iNaturalist:367054								Parasabella media							Animalia	Annelida	Polychaeta	Sabellida	Sabellidae	Parasabella	media		species		Bush, 1905
	imerss.org:PMLS:1023					Andy Lamb		1						PRESENT				Eudistylia vancouveri					iNaturalist:84864								Eudistylia vancouveri							Animalia	Annelida	Polychaeta	Sabellida	Sabellidae	Eudistylia	vancouveri		species		(Kinberg, 1866)
	imerss.org:PMLS:1115			Count: few		Andy Lamb								PRESENT				Serpula columbiana					iNaturalist:131207								Serpula columbiana							Animalia	Annelida	Polychaeta	Sabellida	Serpulidae	Serpula	columbiana		species		Johnson, 1901
	imerss.org:PMLS:1231					Andy Lamb		15						PRESENT				Halosydna brevisetosa					iNaturalist:71236								Halosydna brevisetosa							Animalia	Annelida	Polychaeta	Phyllodocida	Polynoidae	Halosydna	brevisetosa		species		Kinberg, 1856
	imerss.org:PMLS:1232			Count: very abundant		Andy Lamb								PRESENT				Dodecaceria fewkesi					iNaturalist:192656								Dodecaceria fewkesi							Animalia	Annelida	Polychaeta	Terebellida	Cirratulidae	Dodecaceria	fewkesi		species		Berkeley & Berkeley, 1954
	imerss.org:PMLS:1233					Andy Lamb		1						PRESENT				Thelepus spp.					iNaturalist:117588								Thelepus							Animalia	Annelida	Polychaeta	Terebellida	Terebellidae	Thelepus			genus
	imerss.org:PMLS:1234					Andy Lamb								PRESENT				Pista elongata					iNaturalist:338339								Pista elongata							Animalia	Annelida	Polychaeta	Terebellida	Terebellidae	Pista	elongata		species		Moore, 1909
	imerss.org:PMLS:1235					Andy Lamb								PRESENT				Eudistylia vancouveri					iNaturalist:84864								Eudistylia vancouveri							Animalia	Annelida	Polychaeta	Sabellida	Sabellidae	Eudistylia	vancouveri		species		(Kinberg, 1866)
	imerss.org:PMLS:1236					Andy Lamb								PRESENT				Serpula columbiana					iNaturalist:131207								Serpula columbiana							Animalia	Annelida	Polychaeta	Sabellida	Serpulidae	Serpula	columbiana		species		Johnson, 1901
	imerss.org:PMLS:1237			Count: abundant		Andy Lamb								PRESENT				Pileolaria spp.					iNaturalist:533325								Pileolaria							Animalia	Annelida	Polychaeta	Sabellida	Serpulidae	Pileolaria			genus
	imerss.org:PMLS:1327					Charlie Gibbs								PRESENT				Arctonoe pulchra					iNaturalist:465156								Arctonoe pulchra							Animalia	Annelida	Polychaeta	Phyllodocida	Polynoidae	Arctonoe	pulchra		species		(Johnson, 1897)
	imerss.org:PMLS:1328					Charlie Gibbs								PRESENT				Bispira pacifica					iNaturalist:1199401								Bispira pacifica							Animalia	Annelida	Polychaeta	Sabellida	Sabellidae	Bispira	pacifica		species		(Berkeley & Berkeley, 1954)
	imerss.org:PMLS:1329					Charlie Gibbs								PRESENT				Thelepus spp.					iNaturalist:117588								Thelepus							Animalia	Annelida	Polychaeta	Terebellida	Terebellidae	Thelepus			genus
	imerss.org:PMLS:1330					Charlie Gibbs								PRESENT				Spiochaetopterus costarum pottsi					iNaturalist:130236								Spiochaetopterus costarum							Animalia	Annelida	Polychaeta		Chaetopteridae	Spiochaetopterus	costarum		species		(Claparède, 1869)
	imerss.org:PMLS:1388					Charlie Gibbs								PRESENT				Protula pacifica					iNaturalist:538108								Protula pacifica							Animalia	Annelida	Polychaeta	Sabellida	Serpulidae	Protula	pacifica		species		Pixell, 1912
	imerss.org:PMLS:1389					Charlie Gibbs								PRESENT				Serpula columbiana					iNaturalist:131207								Serpula columbiana							Animalia	Annelida	Polychaeta	Sabellida	Serpulidae	Serpula	columbiana		species		Johnson, 1901
	imerss.org:PMLS:1390					Charlie Gibbs								PRESENT				Dodecaceria fewkesi					iNaturalist:192656								Dodecaceria fewkesi							Animalia	Annelida	Polychaeta	Terebellida	Cirratulidae	Dodecaceria	fewkesi		species		Berkeley & Berkeley, 1954
	imerss.org:PMLS:1391					Charlie Gibbs								PRESENT				Myxicola sp.B					iNaturalist:49533								Myxicola infundibulum							Animalia	Annelida	Polychaeta	Sabellida	Sabellidae	Myxicola	infundibulum		species
	imerss.org:PMLS:1392					Charlie Gibbs								PRESENT				Thelepus spp.					iNaturalist:117588								Thelepus							Animalia	Annelida	Polychaeta	Terebellida	Terebellidae	Thelepus			genus
	imerss.org:PMLS:1476					Charlie Gibbs								PRESENT				Serpula columbiana					iNaturalist:131207								Serpula columbiana							Animalia	Annelida	Polychaeta	Sabellida	Serpulidae	Serpula	columbiana		species		Johnson, 1901
	imerss.org:PMLS:1477					Charlie Gibbs								PRESENT				Dodecaceria fewkesi					iNaturalist:192656								Dodecaceria fewkesi							Animalia	Annelida	Polychaeta	Terebellida	Cirratulidae	Dodecaceria	fewkesi		species		Berkeley & Berkeley, 1954
	imerss.org:PMLS:1478					Charlie Gibbs								PRESENT				Eudistylia vancouveri					iNaturalist:84864								Eudistylia vancouveri							Animalia	Annelida	Polychaeta	Sabellida	Sabellidae	Eudistylia	vancouveri		species		(Kinberg, 1866)
	imerss.org:PMLS:1479					Charlie Gibbs								PRESENT				Myxicola sp.B					iNaturalist:49533								Myxicola infundibulum							Animalia	Annelida	Polychaeta	Sabellida	Sabellidae	Myxicola	infundibulum		species
	imerss.org:PMLS:1480					Charlie Gibbs								PRESENT				Thelepus spp.					iNaturalist:117588								Thelepus							Animalia	Annelida	Polychaeta	Terebellida	Terebellidae	Thelepus			genus
	imerss.org:PMLS:1577					Charlie Gibbs								PRESENT				Serpula columbiana					iNaturalist:131207								Serpula columbiana							Animalia	Annelida	Polychaeta	Sabellida	Serpulidae	Serpula	columbiana		species		Johnson, 1901
	imerss.org:PMLS:1578					Charlie Gibbs								PRESENT				Dodecaceria fewkesi					iNaturalist:192656								Dodecaceria fewkesi							Animalia	Annelida	Polychaeta	Terebellida	Cirratulidae	Dodecaceria	fewkesi		species		Berkeley & Berkeley, 1954
	imerss.org:PMLS:1579					Charlie Gibbs								PRESENT				Eudistylia vancouveri					iNaturalist:84864								Eudistylia vancouveri							Animalia	Annelida	Polychaeta	Sabellida	Sabellidae	Eudistylia	vancouveri		species		(Kinberg, 1866)
	imerss.org:PMLS:1580					Charlie Gibbs								PRESENT				Bispira pacifica					iNaturalist:1199401								Bispira pacifica							Animalia	Annelida	Polychaeta	Sabellida	Sabellidae	Bispira	pacifica		species		(Berkeley & Berkeley, 1954)
	imerss.org:PMLS:1581					Charlie Gibbs								PRESENT				Thelepus spp.					iNaturalist:117588								Thelepus							Animalia	Annelida	Polychaeta	Terebellida	Terebellidae	Thelepus			genus
	imerss.org:PMLS:1671					Charlie Gibbs								PRESENT				Protula pacifica					iNaturalist:538108								Protula pacifica							Animalia	Annelida	Polychaeta	Sabellida	Serpulidae	Protula	pacifica		species		Pixell, 1912
	imerss.org:PMLS:1672					Charlie Gibbs								PRESENT				Serpula columbiana					iNaturalist:131207								Serpula columbiana							Animalia	Annelida	Polychaeta	Sabellida	Serpulidae	Serpula	columbiana		species		Johnson, 1901
	imerss.org:PMLS:1673					Charlie Gibbs								PRESENT				Dodecaceria fewkesi					iNaturalist:192656								Dodecaceria fewkesi							Animalia	Annelida	Polychaeta	Terebellida	Cirratulidae	Dodecaceria	fewkesi		species		Berkeley & Berkeley, 1954
	imerss.org:PMLS:1674					Charlie Gibbs								PRESENT				Myxicola sp.B					iNaturalist:49533								Myxicola infundibulum							Animalia	Annelida	Polychaeta	Sabellida	Sabellidae	Myxicola	infundibulum		species
	imerss.org:PMLS:1675					Charlie Gibbs								PRESENT				Thelepus spp.					iNaturalist:117588								Thelepus							Animalia	Annelida	Polychaeta	Terebellida	Terebellidae	Thelepus			genus
	imerss.org:PMLS:1755					Charlie Gibbs								PRESENT				Halosydna brevisetosa					iNaturalist:71236								Halosydna brevisetosa							Animalia	Annelida	Polychaeta	Phyllodocida	Polynoidae	Halosydna	brevisetosa		species		Kinberg, 1856
	imerss.org:PMLS:1756					Charlie Gibbs								PRESENT				Spiochaetopterus costarum pottsi					iNaturalist:130236								Spiochaetopterus costarum							Animalia	Annelida	Polychaeta		Chaetopteridae	Spiochaetopterus	costarum		species		(Claparède, 1869)
	imerss.org:PMLS:1757					Charlie Gibbs								PRESENT				Dodecaceria fewkesi					iNaturalist:192656								Dodecaceria fewkesi							Animalia	Annelida	Polychaeta	Terebellida	Cirratulidae	Dodecaceria	fewkesi		species		Berkeley & Berkeley, 1954
	imerss.org:PMLS:1758					Charlie Gibbs								PRESENT				Thelepus spp.					iNaturalist:117588								Thelepus							Animalia	Annelida	Polychaeta	Terebellida	Terebellidae	Thelepus			genus
	imerss.org:PMLS:1759					Charlie Gibbs								PRESENT				Eudistylia vancouveri					iNaturalist:84864								Eudistylia vancouveri							Animalia	Annelida	Polychaeta	Sabellida	Sabellidae	Eudistylia	vancouveri		species		(Kinberg, 1866)
	imerss.org:PMLS:1760					Charlie Gibbs								PRESENT				Bispira pacifica					iNaturalist:1199401								Bispira pacifica							Animalia	Annelida	Polychaeta	Sabellida	Sabellidae	Bispira	pacifica		species		(Berkeley & Berkeley, 1954)
	imerss.org:PMLS:1761					Charlie Gibbs								PRESENT				Myxicola sp.B					iNaturalist:49533								Myxicola infundibulum							Animalia	Annelida	Polychaeta	Sabellida	Sabellidae	Myxicola	infundibulum		species
	imerss.org:PMLS:1762					Charlie Gibbs								PRESENT				Serpula columbiana					iNaturalist:131207								Serpula columbiana							Animalia	Annelida	Polychaeta	Sabellida	Serpulidae	Serpula	columbiana		species		Johnson, 1901
	imerss.org:PMLS:1763					Charlie Gibbs								PRESENT				Protula pacifica					iNaturalist:538108								Protula pacifica							Animalia	Annelida	Polychaeta	Sabellida	Serpulidae	Protula	pacifica		species		Pixell, 1912
	imerss.org:PMLS:1846					Charlie Gibbs								PRESENT				Serpula columbiana					iNaturalist:131207								Serpula columbiana							Animalia	Annelida	Polychaeta	Sabellida	Serpulidae	Serpula	columbiana		species		Johnson, 1901
	imerss.org:PMLS:1847					Charlie Gibbs								PRESENT				Eudistylia vancouveri					iNaturalist:84864								Eudistylia vancouveri							Animalia	Annelida	Polychaeta	Sabellida	Sabellidae	Eudistylia	vancouveri		species		(Kinberg, 1866)
	imerss.org:PMLS:1848					Charlie Gibbs								PRESENT				Thelepus spp.					iNaturalist:117588								Thelepus							Animalia	Annelida	Polychaeta	Terebellida	Terebellidae	Thelepus			genus
	imerss.org:PMLS:1919					Charlie Gibbs								PRESENT				Serpula columbiana					iNaturalist:131207								Serpula columbiana							Animalia	Annelida	Polychaeta	Sabellida	Serpulidae	Serpula	columbiana		species		Johnson, 1901
	imerss.org:PMLS:1920					Charlie Gibbs								PRESENT				Myxicola sp.B					iNaturalist:49533								Myxicola infundibulum							Animalia	Annelida	Polychaeta	Sabellida	Sabellidae	Myxicola	infundibulum		species
	imerss.org:PMLS:1921					Charlie Gibbs								PRESENT				Thelepus spp.					iNaturalist:117588								Thelepus							Animalia	Annelida	Polychaeta	Terebellida	Terebellidae	Thelepus			genus
	imerss.org:PMLS:1922					Charlie Gibbs								PRESENT				Spiochaetopterus costarum pottsi					iNaturalist:130236								Spiochaetopterus costarum							Animalia	Annelida	Polychaeta		Chaetopteridae	Spiochaetopterus	costarum		species		(Claparède, 1869)
	imerss.org:PMLS:2003					Charlie Gibbs								PRESENT				Dodecaceria fewkesi					iNaturalist:192656								Dodecaceria fewkesi							Animalia	Annelida	Polychaeta	Terebellida	Cirratulidae	Dodecaceria	fewkesi		species		Berkeley & Berkeley, 1954
	imerss.org:PMLS:2004					Charlie Gibbs								PRESENT				Pista elongata					iNaturalist:338339								Pista elongata							Animalia	Annelida	Polychaeta	Terebellida	Terebellidae	Pista	elongata		species		Moore, 1909
	imerss.org:PMLS:2005					Charlie Gibbs								PRESENT				Eudistylia vancouveri					iNaturalist:84864								Eudistylia vancouveri							Animalia	Annelida	Polychaeta	Sabellida	Sabellidae	Eudistylia	vancouveri		species		(Kinberg, 1866)
	imerss.org:PMLS:2006					Charlie Gibbs								PRESENT				Serpula columbiana					iNaturalist:131207								Serpula columbiana							Animalia	Annelida	Polychaeta	Sabellida	Serpulidae	Serpula	columbiana		species		Johnson, 1901
	imerss.org:PMLS:2007					Charlie Gibbs								PRESENT				Pileolaria spp.					iNaturalist:533325								Pileolaria							Animalia	Annelida	Polychaeta	Sabellida	Serpulidae	Pileolaria			genus
	imerss.org:PMLS:2090					Charlie Gibbs								PRESENT				Halosydna brevisetosa					iNaturalist:71236								Halosydna brevisetosa							Animalia	Annelida	Polychaeta	Phyllodocida	Polynoidae	Halosydna	brevisetosa		species		Kinberg, 1856
	imerss.org:PMLS:2091					Charlie Gibbs								PRESENT				Serpula columbiana					iNaturalist:131207								Serpula columbiana							Animalia	Annelida	Polychaeta	Sabellida	Serpulidae	Serpula	columbiana		species		Johnson, 1901
	imerss.org:PMLS:2092					Charlie Gibbs								PRESENT				Pileolaria spp.					iNaturalist:533325								Pileolaria							Animalia	Annelida	Polychaeta	Sabellida	Serpulidae	Pileolaria			genus
	imerss.org:PMLS:2093					Charlie Gibbs								PRESENT				Dodecaceria fewkesi					iNaturalist:192656								Dodecaceria fewkesi							Animalia	Annelida	Polychaeta	Terebellida	Cirratulidae	Dodecaceria	fewkesi		species		Berkeley & Berkeley, 1954
	imerss.org:PMLS:2094					Charlie Gibbs								PRESENT				Eudistylia vancouveri					iNaturalist:84864								Eudistylia vancouveri							Animalia	Annelida	Polychaeta	Sabellida	Sabellidae	Eudistylia	vancouveri		species		(Kinberg, 1866)
	imerss.org:PMLS:2095					Charlie Gibbs								PRESENT				Schizobranchia insignis					iNaturalist:339561								Schizobranchia insignis							Animalia	Annelida	Polychaeta	Sabellida	Sabellidae	Schizobranchia	insignis		species		Bush, 1905
	imerss.org:PMLS:2096					Charlie Gibbs								PRESENT				Myxicola sp.B					iNaturalist:49533								Myxicola infundibulum							Animalia	Annelida	Polychaeta	Sabellida	Sabellidae	Myxicola	infundibulum		species
	imerss.org:PMLS:2097					Charlie Gibbs								PRESENT				Bispira pacifica					iNaturalist:1199401								Bispira pacifica							Animalia	Annelida	Polychaeta	Sabellida	Sabellidae	Bispira	pacifica		species		(Berkeley & Berkeley, 1954)
	imerss.org:PMLS:2098					Charlie Gibbs								PRESENT				Thelepus spp.					iNaturalist:117588								Thelepus							Animalia	Annelida	Polychaeta	Terebellida	Terebellidae	Thelepus			genus
	imerss.org:PMLS:2099					Charlie Gibbs								PRESENT				Spiochaetopterus costarum pottsi					iNaturalist:130236								Spiochaetopterus costarum							Animalia	Annelida	Polychaeta		Chaetopteridae	Spiochaetopterus	costarum		species		(Claparède, 1869)
	imerss.org:PMLS:2200					Charlie Gibbs								PRESENT				Spiochaetopterus costarum pottsi					iNaturalist:130236								Spiochaetopterus costarum							Animalia	Annelida	Polychaeta		Chaetopteridae	Spiochaetopterus	costarum		species		(Claparède, 1869)
	imerss.org:PMLS:2201					Charlie Gibbs								PRESENT				Dodecaceria fewkesi					iNaturalist:192656								Dodecaceria fewkesi							Animalia	Annelida	Polychaeta	Terebellida	Cirratulidae	Dodecaceria	fewkesi		species		Berkeley & Berkeley, 1954
	imerss.org:PMLS:2202					Charlie Gibbs								PRESENT				Thelepus spp.					iNaturalist:117588								Thelepus							Animalia	Annelida	Polychaeta	Terebellida	Terebellidae	Thelepus			genus
	imerss.org:PMLS:2203					Charlie Gibbs								PRESENT				Pista elongata					iNaturalist:338339								Pista elongata							Animalia	Annelida	Polychaeta	Terebellida	Terebellidae	Pista	elongata		species		Moore, 1909
	imerss.org:PMLS:2204					Charlie Gibbs								PRESENT				Myxicola sp.B					iNaturalist:49533								Myxicola infundibulum							Animalia	Annelida	Polychaeta	Sabellida	Sabellidae	Myxicola	infundibulum		species
	imerss.org:PMLS:2205					Charlie Gibbs								PRESENT				Serpula columbiana					iNaturalist:131207								Serpula columbiana							Animalia	Annelida	Polychaeta	Sabellida	Serpulidae	Serpula	columbiana		species		Johnson, 1901
	imerss.org:PMLS:2293					Charlie Gibbs								PRESENT				Spiochaetopterus costarum pottsi					iNaturalist:130236								Spiochaetopterus costarum							Animalia	Annelida	Polychaeta		Chaetopteridae	Spiochaetopterus	costarum		species		(Claparède, 1869)
	imerss.org:PMLS:2294					Charlie Gibbs								PRESENT				Dodecaceria fewkesi					iNaturalist:192656								Dodecaceria fewkesi							Animalia	Annelida	Polychaeta	Terebellida	Cirratulidae	Dodecaceria	fewkesi		species		Berkeley & Berkeley, 1954
	imerss.org:PMLS:2295					Charlie Gibbs								PRESENT				Thelepus spp.					iNaturalist:117588								Thelepus							Animalia	Annelida	Polychaeta	Terebellida	Terebellidae	Thelepus			genus
	imerss.org:PMLS:2296					Charlie Gibbs								PRESENT				Pista elongata					iNaturalist:338339								Pista elongata							Animalia	Annelida	Polychaeta	Terebellida	Terebellidae	Pista	elongata		species		Moore, 1909
	imerss.org:PMLS:2297			Count: many		Charlie Gibbs								PRESENT				Eudistylia vancouveri					iNaturalist:84864								Eudistylia vancouveri							Animalia	Annelida	Polychaeta	Sabellida	Sabellidae	Eudistylia	vancouveri		species		(Kinberg, 1866)
	imerss.org:PMLS:2298			Count: many		Charlie Gibbs								PRESENT				Bispira pacifica					iNaturalist:1199401								Bispira pacifica							Animalia	Annelida	Polychaeta	Sabellida	Sabellidae	Bispira	pacifica		species		(Berkeley & Berkeley, 1954)
	imerss.org:PMLS:2299					Charlie Gibbs								PRESENT				Myxicola sp.B					iNaturalist:49533								Myxicola infundibulum							Animalia	Annelida	Polychaeta	Sabellida	Sabellidae	Myxicola	infundibulum		species
	imerss.org:PMLS:2300					Charlie Gibbs								PRESENT				Serpula columbiana					iNaturalist:131207								Serpula columbiana							Animalia	Annelida	Polychaeta	Sabellida	Serpulidae	Serpula	columbiana		species		Johnson, 1901
	imerss.org:PMLS:2401					Charlie Gibbs								PRESENT				Dodecaceria fewkesi					iNaturalist:192656								Dodecaceria fewkesi							Animalia	Annelida	Polychaeta	Terebellida	Cirratulidae	Dodecaceria	fewkesi		species		Berkeley & Berkeley, 1954
	imerss.org:PMLS:2402					Charlie Gibbs								PRESENT				Neosabellaria cementarium					iNaturalist:339237								Neosabellaria cementarium							Animalia	Annelida	Polychaeta		Sabellariidae	Neosabellaria	cementarium		species		(Moore, 1906)
	imerss.org:PMLS:2403					Charlie Gibbs								PRESENT				Thelepus spp.					iNaturalist:117588								Thelepus							Animalia	Annelida	Polychaeta	Terebellida	Terebellidae	Thelepus			genus
	imerss.org:PMLS:2404					Charlie Gibbs								PRESENT				Myxicola sp.B					iNaturalist:49533								Myxicola infundibulum							Animalia	Annelida	Polychaeta	Sabellida	Sabellidae	Myxicola	infundibulum		species
	imerss.org:PMLS:2405					Charlie Gibbs								PRESENT				Serpula columbiana					iNaturalist:131207								Serpula columbiana							Animalia	Annelida	Polychaeta	Sabellida	Serpulidae	Serpula	columbiana		species		Johnson, 1901
	imerss.org:PMLS:2498					Charlie Gibbs								PRESENT				Dodecaceria fewkesi					iNaturalist:192656								Dodecaceria fewkesi							Animalia	Annelida	Polychaeta	Terebellida	Cirratulidae	Dodecaceria	fewkesi		species		Berkeley & Berkeley, 1954
	imerss.org:PMLS:2499					Charlie Gibbs								PRESENT				Serpula columbiana					iNaturalist:131207								Serpula columbiana							Animalia	Annelida	Polychaeta	Sabellida	Serpulidae	Serpula	columbiana		species		Johnson, 1901
	imerss.org:PMLS:2583					Charlie Gibbs								PRESENT				Dodecaceria fewkesi					iNaturalist:192656								Dodecaceria fewkesi							Animalia	Annelida	Polychaeta	Terebellida	Cirratulidae	Dodecaceria	fewkesi		species		Berkeley & Berkeley, 1954
	imerss.org:PMLS:2584					Charlie Gibbs								PRESENT				Thelepus spp.					iNaturalist:117588								Thelepus							Animalia	Annelida	Polychaeta	Terebellida	Terebellidae	Thelepus			genus
	imerss.org:PMLS:2585					Charlie Gibbs								PRESENT				Myxicola sp.B					iNaturalist:49533								Myxicola infundibulum							Animalia	Annelida	Polychaeta	Sabellida	Sabellidae	Myxicola	infundibulum		species
	imerss.org:PMLS:2586					Charlie Gibbs								PRESENT				Serpula columbiana					iNaturalist:131207								Serpula columbiana							Animalia	Annelida	Polychaeta	Sabellida	Serpulidae	Serpula	columbiana		species		Johnson, 1901
	imerss.org:PMLS:2672					Charlie Gibbs								PRESENT				Dodecaceria fewkesi					iNaturalist:192656								Dodecaceria fewkesi							Animalia	Annelida	Polychaeta	Terebellida	Cirratulidae	Dodecaceria	fewkesi		species		Berkeley & Berkeley, 1954
	imerss.org:PMLS:2673					Charlie Gibbs								PRESENT				Thelepus spp.					iNaturalist:117588								Thelepus							Animalia	Annelida	Polychaeta	Terebellida	Terebellidae	Thelepus			genus
	imerss.org:PMLS:2674					Charlie Gibbs								PRESENT				Serpula columbiana					iNaturalist:131207								Serpula columbiana							Animalia	Annelida	Polychaeta	Sabellida	Serpulidae	Serpula	columbiana		species		Johnson, 1901
	imerss.org:PMLS:2675					Charlie Gibbs								PRESENT				Pileolaria spp.					iNaturalist:533325								Pileolaria							Animalia	Annelida	Polychaeta	Sabellida	Serpulidae	Pileolaria			genus
	imerss.org:PMLS:2746					Donna Gibbs								PRESENT				Dodecaceria fewkesi					iNaturalist:192656								Dodecaceria fewkesi							Animalia	Annelida	Polychaeta	Terebellida	Cirratulidae	Dodecaceria	fewkesi		species		Berkeley & Berkeley, 1954
	imerss.org:PMLS:2747					Donna Gibbs								PRESENT				Pista elongata					iNaturalist:338339								Pista elongata							Animalia	Annelida	Polychaeta	Terebellida	Terebellidae	Pista	elongata		species		Moore, 1909
	imerss.org:PMLS:2792					Andy Lamb								PRESENT				Serpula columbiana					iNaturalist:131207								Serpula columbiana							Animalia	Annelida	Polychaeta	Sabellida	Serpulidae	Serpula	columbiana		species		Johnson, 1901
	imerss.org:PMLS:2793			Count: abundant		Andy Lamb								PRESENT				Dodecaceria fewkesi					iNaturalist:192656								Dodecaceria fewkesi							Animalia	Annelida	Polychaeta	Terebellida	Cirratulidae	Dodecaceria	fewkesi		species		Berkeley & Berkeley, 1954
	imerss.org:PMLS:2794					Andy Lamb		2						PRESENT				Chone aurantiaca					iNaturalist:356415								Chone aurantiaca							Animalia	Annelida	Polychaeta	Sabellida	Sabellidae	Chone	aurantiaca		species		(Johnson, 1901)
	imerss.org:PMLS:2880					Charlie Gibbs								PRESENT				Serpula columbiana					iNaturalist:131207								Serpula columbiana							Animalia	Annelida	Polychaeta	Sabellida	Serpulidae	Serpula	columbiana		species		Johnson, 1901
	imerss.org:PMLS:2881					Charlie Gibbs								PRESENT				Pileolaria spp.					iNaturalist:533325								Pileolaria							Animalia	Annelida	Polychaeta	Sabellida	Serpulidae	Pileolaria			genus
	imerss.org:PMLS:2882			Count: many		Charlie Gibbs								PRESENT				Dodecaceria concharum					iNaturalist:464813								Dodecaceria concharum							Animalia	Annelida	Polychaeta	Terebellida	Cirratulidae	Dodecaceria	concharum		species		Örsted, 1843
	imerss.org:PMLS:2883			Count: abundant		Charlie Gibbs								PRESENT				Dodecaceria fewkesi					iNaturalist:192656								Dodecaceria fewkesi							Animalia	Annelida	Polychaeta	Terebellida	Cirratulidae	Dodecaceria	fewkesi		species		Berkeley & Berkeley, 1954
	imerss.org:PMLS:2884					Charlie Gibbs		1						PRESENT				Chone aurantiaca					iNaturalist:356415								Chone aurantiaca							Animalia	Annelida	Polychaeta	Sabellida	Sabellidae	Chone	aurantiaca		species		(Johnson, 1901)
	imerss.org:PMLS:2885					Charlie Gibbs								PRESENT				Pista elongata					iNaturalist:338339								Pista elongata							Animalia	Annelida	Polychaeta	Terebellida	Terebellidae	Pista	elongata		species		Moore, 1909
	imerss.org:PMLS:2886					Charlie Gibbs								PRESENT				Thelepus spp.					iNaturalist:117588								Thelepus							Animalia	Annelida	Polychaeta	Terebellida	Terebellidae	Thelepus			genus
	imerss.org:PMLS:3019			Count: few		Andy Lamb								PRESENT				Diopatra ornata					iNaturalist:339286								Diopatra ornata							Animalia	Annelida	Polychaeta	Eunicida	Onuphidae	Diopatra	ornata		species		Moore, 1911
	imerss.org:PMLS:3020			Count: many		Andy Lamb								PRESENT				Serpula columbiana					iNaturalist:131207								Serpula columbiana							Animalia	Annelida	Polychaeta	Sabellida	Serpulidae	Serpula	columbiana		species		Johnson, 1901
	imerss.org:PMLS:3021					Andy Lamb								PRESENT				Dodecaceria fewkesi					iNaturalist:192656								Dodecaceria fewkesi							Animalia	Annelida	Polychaeta	Terebellida	Cirratulidae	Dodecaceria	fewkesi		species		Berkeley & Berkeley, 1954
	imerss.org:PMLS:3022					Andy Lamb								PRESENT				Chone aurantiaca					iNaturalist:356415								Chone aurantiaca							Animalia	Annelida	Polychaeta	Sabellida	Sabellidae	Chone	aurantiaca		species		(Johnson, 1901)
	imerss.org:PMLS:3023					Andy Lamb		1						PRESENT				Pectinariidae					iNaturalist:194009															Animalia	Annelida	Polychaeta	Terebellida	Pectinariidae				family
	imerss.org:PMLS:3024					Andy Lamb		1						PRESENT				Spiochaetopterus costarum pottsi					iNaturalist:130236								Spiochaetopterus costarum							Animalia	Annelida	Polychaeta		Chaetopteridae	Spiochaetopterus	costarum		species		(Claparède, 1869)
	imerss.org:PMLS:3119			Count: abundant		Andy Lamb								PRESENT				Dodecaceria fewkesi					iNaturalist:192656								Dodecaceria fewkesi							Animalia	Annelida	Polychaeta	Terebellida	Cirratulidae	Dodecaceria	fewkesi		species		Berkeley & Berkeley, 1954
	imerss.org:PMLS:3120					Andy Lamb		2						PRESENT				Thelepus spp.					iNaturalist:117588								Thelepus							Animalia	Annelida	Polychaeta	Terebellida	Terebellidae	Thelepus			genus
	imerss.org:PMLS:3121			Count: few		Andy Lamb								PRESENT				Parasabella media					iNaturalist:367054								Parasabella media							Animalia	Annelida	Polychaeta	Sabellida	Sabellidae	Parasabella	media		species		Bush, 1905
	imerss.org:PMLS:3122			Count: few		Andy Lamb								PRESENT				Myxicola sp.B					iNaturalist:49533								Myxicola infundibulum							Animalia	Annelida	Polychaeta	Sabellida	Sabellidae	Myxicola	infundibulum		species
	imerss.org:PMLS:3123			Count: some		Andy Lamb								PRESENT				Serpula columbiana					iNaturalist:131207								Serpula columbiana							Animalia	Annelida	Polychaeta	Sabellida	Serpulidae	Serpula	columbiana		species		Johnson, 1901
	imerss.org:PMLS:3204			Count: some		Andy Lamb								PRESENT				Serpula columbiana					iNaturalist:131207								Serpula columbiana							Animalia	Annelida	Polychaeta	Sabellida	Serpulidae	Serpula	columbiana		species		Johnson, 1901
	imerss.org:PMLS:3205			Count: very many		Andy Lamb								PRESENT				Pileolaria spp.					iNaturalist:533325								Pileolaria							Animalia	Annelida	Polychaeta	Sabellida	Serpulidae	Pileolaria			genus
	imerss.org:PMLS:3206			Count: very abundant		Andy Lamb								PRESENT				Dodecaceria fewkesi					iNaturalist:192656								Dodecaceria fewkesi							Animalia	Annelida	Polychaeta	Terebellida	Cirratulidae	Dodecaceria	fewkesi		species		Berkeley & Berkeley, 1954
	imerss.org:PMLS:3314			Count: few		Andy Lamb								PRESENT				Serpula columbiana					iNaturalist:131207								Serpula columbiana							Animalia	Annelida	Polychaeta	Sabellida	Serpulidae	Serpula	columbiana		species		Johnson, 1901
	imerss.org:PMLS:3315			Count: some		Andy Lamb								PRESENT				Pseudochitinopoma occidentalis					iNaturalist:538107								Pseudochitinopoma occidentalis							Animalia	Annelida	Polychaeta	Sabellida	Serpulidae	Pseudochitinopoma	occidentalis		species		(Bush, 1905)
	imerss.org:PMLS:3316					Andy Lamb		1						PRESENT				Parasabella media					iNaturalist:367054								Parasabella media							Animalia	Annelida	Polychaeta	Sabellida	Sabellidae	Parasabella	media		species		Bush, 1905
	imerss.org:PMLS:3317					Andy Lamb		1						PRESENT				Spiochaetopterus costarum pottsi					iNaturalist:130236								Spiochaetopterus costarum							Animalia	Annelida	Polychaeta		Chaetopteridae	Spiochaetopterus	costarum		species		(Claparède, 1869)
	imerss.org:PMLS:3318			Count: few		Andy Lamb								PRESENT				Chaetopterus variopedatus complex					iNaturalist:216631								Chaetopterus variopedatus							Animalia	Annelida	Polychaeta		Chaetopteridae	Chaetopterus	variopedatus		species
	imerss.org:PMLS:3405					Andy Lamb		1						PRESENT				Ophiodromus pugettensis					iNaturalist:494514								Oxydromus pugettensis							Animalia	Annelida	Polychaeta	Phyllodocida	Hesionidae	Oxydromus	pugettensis		species		(Johnson, 1901)
	imerss.org:PMLS:3406			Count: few		Andy Lamb								PRESENT				Diopatra ornata					iNaturalist:339286								Diopatra ornata							Animalia	Annelida	Polychaeta	Eunicida	Onuphidae	Diopatra	ornata		species		Moore, 1911
	imerss.org:PMLS:3407			Count: few		Andy Lamb								PRESENT				Protula pacifica					iNaturalist:538108								Protula pacifica							Animalia	Annelida	Polychaeta	Sabellida	Serpulidae	Protula	pacifica		species		Pixell, 1912
	imerss.org:PMLS:3408			Count: few		Andy Lamb								PRESENT				Serpula columbiana					iNaturalist:131207								Serpula columbiana							Animalia	Annelida	Polychaeta	Sabellida	Serpulidae	Serpula	columbiana		species		Johnson, 1901
	imerss.org:PMLS:3409			Count: abundant		Andy Lamb								PRESENT				Dodecaceria fewkesi					iNaturalist:192656								Dodecaceria fewkesi							Animalia	Annelida	Polychaeta	Terebellida	Cirratulidae	Dodecaceria	fewkesi		species		Berkeley & Berkeley, 1954
	imerss.org:PMLS:3410					Andy Lamb		2						PRESENT				Chone aurantiaca					iNaturalist:356415								Chone aurantiaca							Animalia	Annelida	Polychaeta	Sabellida	Sabellidae	Chone	aurantiaca		species		(Johnson, 1901)
	imerss.org:PMLS:3411			Count: few		Andy Lamb								PRESENT				Eudistylia vancouveri					iNaturalist:84864								Eudistylia vancouveri							Animalia	Annelida	Polychaeta	Sabellida	Sabellidae	Eudistylia	vancouveri		species		(Kinberg, 1866)
	imerss.org:PMLS:3412			Count: very many		Andy Lamb								PRESENT				Myxicola sp.B					iNaturalist:49533								Myxicola infundibulum							Animalia	Annelida	Polychaeta	Sabellida	Sabellidae	Myxicola	infundibulum		species
	imerss.org:PMLS:3413			Count: few		Andy Lamb								PRESENT				Bispira pacifica					iNaturalist:1199401								Bispira pacifica							Animalia	Annelida	Polychaeta	Sabellida	Sabellidae	Bispira	pacifica		species		(Berkeley & Berkeley, 1954)
	imerss.org:PMLS:3414					Andy Lamb		1						PRESENT				Thelepus spp.					iNaturalist:117588								Thelepus							Animalia	Annelida	Polychaeta	Terebellida	Terebellidae	Thelepus			genus
	imerss.org:PMLS:3539					Andy Lamb		1						PRESENT				Arctonoe fragilis					iNaturalist:69914								Arctonoe fragilis							Animalia	Annelida	Polychaeta	Phyllodocida	Polynoidae	Arctonoe	fragilis		species		(Baird, 1863)
	imerss.org:PMLS:3540			Count: few		Andy Lamb								PRESENT				Serpula columbiana					iNaturalist:131207								Serpula columbiana							Animalia	Annelida	Polychaeta	Sabellida	Serpulidae	Serpula	columbiana		species		Johnson, 1901
	imerss.org:PMLS:3541			Count: abundant		Andy Lamb								PRESENT				Dodecaceria fewkesi					iNaturalist:192656								Dodecaceria fewkesi							Animalia	Annelida	Polychaeta	Terebellida	Cirratulidae	Dodecaceria	fewkesi		species		Berkeley & Berkeley, 1954
	imerss.org:PMLS:3542			Count: some		Andy Lamb								PRESENT				Myxicola sp.B					iNaturalist:49533								Myxicola infundibulum							Animalia	Annelida	Polychaeta	Sabellida	Sabellidae	Myxicola	infundibulum		species
	imerss.org:PMLS:3543					Andy Lamb		2						PRESENT				Thelepus spp.					iNaturalist:117588								Thelepus							Animalia	Annelida	Polychaeta	Terebellida	Terebellidae	Thelepus			genus
	imerss.org:PMLS:3675			Count: very many		Andy Lamb								PRESENT				Serpula columbiana					iNaturalist:131207								Serpula columbiana							Animalia	Annelida	Polychaeta	Sabellida	Serpulidae	Serpula	columbiana		species		Johnson, 1901
	imerss.org:PMLS:3676			Count: very abundant		Andy Lamb								PRESENT				Dodecaceria fewkesi					iNaturalist:192656								Dodecaceria fewkesi							Animalia	Annelida	Polychaeta	Terebellida	Cirratulidae	Dodecaceria	fewkesi		species		Berkeley & Berkeley, 1954
	imerss.org:PMLS:3677			Count: very many		Andy Lamb								PRESENT				Eudistylia vancouveri					iNaturalist:84864								Eudistylia vancouveri							Animalia	Annelida	Polychaeta	Sabellida	Sabellidae	Eudistylia	vancouveri		species		(Kinberg, 1866)
	imerss.org:PMLS:3678			Count: some		Andy Lamb								PRESENT				Myxicola sp.B					iNaturalist:49533								Myxicola infundibulum							Animalia	Annelida	Polychaeta	Sabellida	Sabellidae	Myxicola	infundibulum		species
	imerss.org:PMLS:3679					Andy Lamb		1						PRESENT				Thelepus spp.					iNaturalist:117588								Thelepus							Animalia	Annelida	Polychaeta	Terebellida	Terebellidae	Thelepus			genus
	imerss.org:PMLS:3788					Andy Lamb		2						PRESENT				Protula pacifica					iNaturalist:538108								Protula pacifica							Animalia	Annelida	Polychaeta	Sabellida	Serpulidae	Protula	pacifica		species		Pixell, 1912
	imerss.org:PMLS:3789			Count: very many		Andy Lamb								PRESENT				Serpula columbiana					iNaturalist:131207								Serpula columbiana							Animalia	Annelida	Polychaeta	Sabellida	Serpulidae	Serpula	columbiana		species		Johnson, 1901
	imerss.org:PMLS:3790			Count: some		Andy Lamb								PRESENT				Dodecaceria fewkesi					iNaturalist:192656								Dodecaceria fewkesi							Animalia	Annelida	Polychaeta	Terebellida	Cirratulidae	Dodecaceria	fewkesi		species		Berkeley & Berkeley, 1954
	imerss.org:PMLS:3911			Count: some		Andy Lamb								PRESENT				Serpula columbiana					iNaturalist:131207								Serpula columbiana							Animalia	Annelida	Polychaeta	Sabellida	Serpulidae	Serpula	columbiana		species		Johnson, 1901
	imerss.org:PMLS:3912			Count: abundant		Andy Lamb								PRESENT				Pileolaria spp.					iNaturalist:533325								Pileolaria							Animalia	Annelida	Polychaeta	Sabellida	Serpulidae	Pileolaria			genus
	imerss.org:PMLS:3913			Count: abundant		Andy Lamb								PRESENT				Dodecaceria fewkesi					iNaturalist:192656								Dodecaceria fewkesi							Animalia	Annelida	Polychaeta	Terebellida	Cirratulidae	Dodecaceria	fewkesi		species		Berkeley & Berkeley, 1954
	imerss.org:PMLS:3914			Count: very abundant		Andy Lamb								PRESENT				Eudistylia vancouveri					iNaturalist:84864								Eudistylia vancouveri							Animalia	Annelida	Polychaeta	Sabellida	Sabellidae	Eudistylia	vancouveri		species		(Kinberg, 1866)
	imerss.org:PMLS:3915			Count: many		Andy Lamb								PRESENT				Schizobranchia insignis					iNaturalist:339561								Schizobranchia insignis							Animalia	Annelida	Polychaeta	Sabellida	Sabellidae	Schizobranchia	insignis		species		Bush, 1905
	imerss.org:PMLS:4000			Count: some		Andy Lamb								PRESENT				Serpula columbiana					iNaturalist:131207								Serpula columbiana							Animalia	Annelida	Polychaeta	Sabellida	Serpulidae	Serpula	columbiana		species		Johnson, 1901
	imerss.org:PMLS:4001					Andy Lamb		1						PRESENT				Myxicola sp.B					iNaturalist:49533								Myxicola infundibulum							Animalia	Annelida	Polychaeta	Sabellida	Sabellidae	Myxicola	infundibulum		species
	imerss.org:PMLS:4113			Count: few		Andy Lamb								PRESENT				Arctonoe pulchra					iNaturalist:465156								Arctonoe pulchra							Animalia	Annelida	Polychaeta	Phyllodocida	Polynoidae	Arctonoe	pulchra		species		(Johnson, 1897)
	imerss.org:PMLS:4114			Count: some		Andy Lamb								PRESENT				Serpula columbiana					iNaturalist:131207								Serpula columbiana							Animalia	Annelida	Polychaeta	Sabellida	Serpulidae	Serpula	columbiana		species		Johnson, 1901
	imerss.org:PMLS:4115			Count: abundant		Andy Lamb								PRESENT				Dodecaceria fewkesi					iNaturalist:192656								Dodecaceria fewkesi							Animalia	Annelida	Polychaeta	Terebellida	Cirratulidae	Dodecaceria	fewkesi		species		Berkeley & Berkeley, 1954
	imerss.org:PMLS:4116					Andy Lamb		1						PRESENT				Myxicola sp.B					iNaturalist:49533								Myxicola infundibulum							Animalia	Annelida	Polychaeta	Sabellida	Sabellidae	Myxicola	infundibulum		species
	imerss.org:PMLS:4117					Andy Lamb		2						PRESENT				Thelepus spp.					iNaturalist:117588								Thelepus							Animalia	Annelida	Polychaeta	Terebellida	Terebellidae	Thelepus			genus
	imerss.org:PMLS:4118			Count: few		Andy Lamb								PRESENT				Phyllochaetopterus prolifica					iNaturalist:467241								Phyllochaetopterus prolifica							Animalia	Annelida	Polychaeta		Chaetopteridae	Phyllochaetopterus	prolifica		species		Potts, 1914
	imerss.org:PMLS:4222			Count: many		Andy Lamb								PRESENT				Salmacina tribranchiata					iNaturalist:194972								Salmacina tribranchiata							Animalia	Annelida	Polychaeta	Sabellida	Serpulidae	Salmacina	tribranchiata		species		(Moore, 1923)
	imerss.org:PMLS:4223			Count: few		Andy Lamb								PRESENT				Pseudochitinopoma occidentalis					iNaturalist:538107								Pseudochitinopoma occidentalis							Animalia	Annelida	Polychaeta	Sabellida	Serpulidae	Pseudochitinopoma	occidentalis		species		(Bush, 1905)
	imerss.org:PMLS:4224			Count: abundant		Andy Lamb								PRESENT				Dodecaceria fewkesi					iNaturalist:192656								Dodecaceria fewkesi							Animalia	Annelida	Polychaeta	Terebellida	Cirratulidae	Dodecaceria	fewkesi		species		Berkeley & Berkeley, 1954
	imerss.org:PMLS:4225					Andy Lamb		1						PRESENT				Eudistylia vancouveri					iNaturalist:84864								Eudistylia vancouveri							Animalia	Annelida	Polychaeta	Sabellida	Sabellidae	Eudistylia	vancouveri		species		(Kinberg, 1866)
	imerss.org:PMLS:4226					Andy Lamb		1						PRESENT				Myxicola sp.B					iNaturalist:49533								Myxicola infundibulum							Animalia	Annelida	Polychaeta	Sabellida	Sabellidae	Myxicola	infundibulum		species
	imerss.org:PMLS:4227					Andy Lamb		2						PRESENT				Thelepus spp.					iNaturalist:117588								Thelepus							Animalia	Annelida	Polychaeta	Terebellida	Terebellidae	Thelepus			genus
	imerss.org:PMLS:4228			Count: few		Andy Lamb								PRESENT				Phyllochaetopterus prolifica					iNaturalist:467241								Phyllochaetopterus prolifica							Animalia	Annelida	Polychaeta		Chaetopteridae	Phyllochaetopterus	prolifica		species		Potts, 1914
	imerss.org:PMLS:4341			Count: some		Andy Lamb								PRESENT				Serpula columbiana					iNaturalist:131207								Serpula columbiana							Animalia	Annelida	Polychaeta	Sabellida	Serpulidae	Serpula	columbiana		species		Johnson, 1901
	imerss.org:PMLS:4342			Count: few		Andy Lamb								PRESENT				Dodecaceria fewkesi					iNaturalist:192656								Dodecaceria fewkesi							Animalia	Annelida	Polychaeta	Terebellida	Cirratulidae	Dodecaceria	fewkesi		species		Berkeley & Berkeley, 1954
	imerss.org:PMLS:4343					Andy Lamb		1						PRESENT				Myxicola sp.B					iNaturalist:49533								Myxicola infundibulum							Animalia	Annelida	Polychaeta	Sabellida	Sabellidae	Myxicola	infundibulum		species
	imerss.org:PMLS:4344					Andy Lamb		2						PRESENT				Thelepus spp.					iNaturalist:117588								Thelepus							Animalia	Annelida	Polychaeta	Terebellida	Terebellidae	Thelepus			genus
	imerss.org:PMLS:4423			Count: few		Charlie Gibbs								PRESENT				Protula pacifica					iNaturalist:538108								Protula pacifica							Animalia	Annelida	Polychaeta	Sabellida	Serpulidae	Protula	pacifica		species		Pixell, 1912
	imerss.org:PMLS:4424			Count: some		Charlie Gibbs								PRESENT				Serpula columbiana					iNaturalist:131207								Serpula columbiana							Animalia	Annelida	Polychaeta	Sabellida	Serpulidae	Serpula	columbiana		species		Johnson, 1901
	imerss.org:PMLS:4425			Count: very many		Charlie Gibbs								PRESENT				Dodecaceria concharum					iNaturalist:464813								Dodecaceria concharum							Animalia	Annelida	Polychaeta	Terebellida	Cirratulidae	Dodecaceria	concharum		species		Örsted, 1843
	imerss.org:PMLS:4426			Count: few		Charlie Gibbs								PRESENT				Eudistylia vancouveri					iNaturalist:84864								Eudistylia vancouveri							Animalia	Annelida	Polychaeta	Sabellida	Sabellidae	Eudistylia	vancouveri		species		(Kinberg, 1866)
	imerss.org:PMLS:4427			Count: some		Charlie Gibbs								PRESENT				Myxicola sp.B					iNaturalist:49533								Myxicola infundibulum							Animalia	Annelida	Polychaeta	Sabellida	Sabellidae	Myxicola	infundibulum		species
	imerss.org:PMLS:4428			Count: some		Charlie Gibbs								PRESENT				Phyllochaetopterus prolifica					iNaturalist:467241								Phyllochaetopterus prolifica							Animalia	Annelida	Polychaeta		Chaetopteridae	Phyllochaetopterus	prolifica		species		Potts, 1914
	imerss.org:PMLS:4512			Count: few		Charlie Gibbs								PRESENT				Serpula columbiana					iNaturalist:131207								Serpula columbiana							Animalia	Annelida	Polychaeta	Sabellida	Serpulidae	Serpula	columbiana		species		Johnson, 1901
	imerss.org:PMLS:4513			Count: many		Charlie Gibbs								PRESENT				Dodecaceria concharum					iNaturalist:464813								Dodecaceria concharum							Animalia	Annelida	Polychaeta	Terebellida	Cirratulidae	Dodecaceria	concharum		species		Örsted, 1843
	imerss.org:PMLS:4514			Count: few		Charlie Gibbs								PRESENT				Thelepus spp.					iNaturalist:117588								Thelepus							Animalia	Annelida	Polychaeta	Terebellida	Terebellidae	Thelepus			genus
	imerss.org:PMLS:4568					Andy Lamb		1						PRESENT				Eudistylia vancouveri					iNaturalist:84864								Eudistylia vancouveri							Animalia	Annelida	Polychaeta	Sabellida	Sabellidae	Eudistylia	vancouveri		species		(Kinberg, 1866)
	imerss.org:PMLS:4618					Andy Lamb		2						PRESENT				Protula pacifica					iNaturalist:538108								Protula pacifica							Animalia	Annelida	Polychaeta	Sabellida	Serpulidae	Protula	pacifica		species		Pixell, 1912
	imerss.org:PMLS:4619			Count: very many		Andy Lamb								PRESENT				Serpula columbiana					iNaturalist:131207								Serpula columbiana							Animalia	Annelida	Polychaeta	Sabellida	Serpulidae	Serpula	columbiana		species		Johnson, 1901
	imerss.org:PMLS:4620			Count: abundant		Andy Lamb								PRESENT				Dodecaceria fewkesi					iNaturalist:192656								Dodecaceria fewkesi							Animalia	Annelida	Polychaeta	Terebellida	Cirratulidae	Dodecaceria	fewkesi		species		Berkeley & Berkeley, 1954
	imerss.org:PMLS:4621					Andy Lamb		1						PRESENT				Parasabella media					iNaturalist:367054								Parasabella media							Animalia	Annelida	Polychaeta	Sabellida	Sabellidae	Parasabella	media		species		Bush, 1905
	imerss.org:PMLS:4622			Count: few		Andy Lamb								PRESENT				Myxicola sp.B					iNaturalist:49533								Myxicola infundibulum							Animalia	Annelida	Polychaeta	Sabellida	Sabellidae	Myxicola	infundibulum		species
	imerss.org:PMLS:4623					Andy Lamb		1						PRESENT				Pista elongata					iNaturalist:338339								Pista elongata							Animalia	Annelida	Polychaeta	Terebellida	Terebellidae	Pista	elongata		species		Moore, 1909
	imerss.org:PMLS:4624					Andy Lamb		2						PRESENT				Thelepus spp.					iNaturalist:117588								Thelepus							Animalia	Annelida	Polychaeta	Terebellida	Terebellidae	Thelepus			genus
	imerss.org:PMLS:4625			Count: some		Andy Lamb								PRESENT				Phyllochaetopterus prolifica					iNaturalist:467241								Phyllochaetopterus prolifica							Animalia	Annelida	Polychaeta		Chaetopteridae	Phyllochaetopterus	prolifica		species		Potts, 1914
	imerss.org:PMLS:4732			Count: very many		Andy Lamb								PRESENT				Serpula columbiana					iNaturalist:131207								Serpula columbiana							Animalia	Annelida	Polychaeta	Sabellida	Serpulidae	Serpula	columbiana		species		Johnson, 1901
	imerss.org:PMLS:4733			Count: many		Andy Lamb								PRESENT				Dodecaceria concharum					iNaturalist:464813								Dodecaceria concharum							Animalia	Annelida	Polychaeta	Terebellida	Cirratulidae	Dodecaceria	concharum		species		Örsted, 1843
	imerss.org:PMLS:4734			Count: very abundant		Andy Lamb								PRESENT				Dodecaceria fewkesi					iNaturalist:192656								Dodecaceria fewkesi							Animalia	Annelida	Polychaeta	Terebellida	Cirratulidae	Dodecaceria	fewkesi		species		Berkeley & Berkeley, 1954
	imerss.org:PMLS:4735			Count: few		Andy Lamb								PRESENT				Parasabella media					iNaturalist:367054								Parasabella media							Animalia	Annelida	Polychaeta	Sabellida	Sabellidae	Parasabella	media		species		Bush, 1905
	imerss.org:PMLS:4736			Count: some		Andy Lamb								PRESENT				Myxicola sp.B					iNaturalist:49533								Myxicola infundibulum							Animalia	Annelida	Polychaeta	Sabellida	Sabellidae	Myxicola	infundibulum		species
	imerss.org:PMLS:4737			Count: few		Andy Lamb								PRESENT				Pista elongata					iNaturalist:338339								Pista elongata							Animalia	Annelida	Polychaeta	Terebellida	Terebellidae	Pista	elongata		species		Moore, 1909
	imerss.org:PMLS:4738			Count: some		Andy Lamb								PRESENT				Phyllochaetopterus prolifica					iNaturalist:467241								Phyllochaetopterus prolifica							Animalia	Annelida	Polychaeta		Chaetopteridae	Phyllochaetopterus	prolifica		species		Potts, 1914
	imerss.org:PMLS:4856					Andy Lamb		2						PRESENT				Apomatus geniculatus					iNaturalist:939557								Apomatus geniculatus							Animalia	Annelida	Polychaeta	Sabellida	Serpulidae	Apomatus	geniculatus		species		(Moore & Bush, 1904)
	imerss.org:PMLS:4857			Count: very many		Andy Lamb								PRESENT				Serpula columbiana					iNaturalist:131207								Serpula columbiana							Animalia	Annelida	Polychaeta	Sabellida	Serpulidae	Serpula	columbiana		species		Johnson, 1901
	imerss.org:PMLS:4858			Count: very many		Andy Lamb								PRESENT				Pseudochitinopoma occidentalis					iNaturalist:538107								Pseudochitinopoma occidentalis							Animalia	Annelida	Polychaeta	Sabellida	Serpulidae	Pseudochitinopoma	occidentalis		species		(Bush, 1905)
	imerss.org:PMLS:4859			Count: many		Andy Lamb								PRESENT				Pileolaria spp.					iNaturalist:533325								Pileolaria							Animalia	Annelida	Polychaeta	Sabellida	Serpulidae	Pileolaria			genus
	imerss.org:PMLS:4860			Count: abundant		Andy Lamb								PRESENT				Dodecaceria fewkesi					iNaturalist:192656								Dodecaceria fewkesi							Animalia	Annelida	Polychaeta	Terebellida	Cirratulidae	Dodecaceria	fewkesi		species		Berkeley & Berkeley, 1954
	imerss.org:PMLS:4861					Andy Lamb		1						PRESENT				Myxicola sp.B					iNaturalist:49533								Myxicola infundibulum							Animalia	Annelida	Polychaeta	Sabellida	Sabellidae	Myxicola	infundibulum		species
	imerss.org:PMLS:4862			Count: few		Andy Lamb								PRESENT				Phyllochaetopterus sp.					iNaturalist:374226								Phyllochaetopterus							Animalia	Annelida	Polychaeta		Chaetopteridae	Phyllochaetopterus			genus
	imerss.org:PMLS:4958					Andy Lamb		2						PRESENT				Protula pacifica					iNaturalist:538108								Protula pacifica							Animalia	Annelida	Polychaeta	Sabellida	Serpulidae	Protula	pacifica		species		Pixell, 1912
	imerss.org:PMLS:4959			Count: some		Andy Lamb								PRESENT				Serpula columbiana					iNaturalist:131207								Serpula columbiana							Animalia	Annelida	Polychaeta	Sabellida	Serpulidae	Serpula	columbiana		species		Johnson, 1901
	imerss.org:PMLS:4960			Count: some		Andy Lamb								PRESENT				Pseudochitinopoma occidentalis					iNaturalist:538107								Pseudochitinopoma occidentalis							Animalia	Annelida	Polychaeta	Sabellida	Serpulidae	Pseudochitinopoma	occidentalis		species		(Bush, 1905)
	imerss.org:PMLS:4961			Count: some		Andy Lamb								PRESENT				Pileolaria spp.					iNaturalist:533325								Pileolaria							Animalia	Annelida	Polychaeta	Sabellida	Serpulidae	Pileolaria			genus
	imerss.org:PMLS:4962			Count: some		Andy Lamb								PRESENT				Dodecaceria fewkesi					iNaturalist:192656								Dodecaceria fewkesi							Animalia	Annelida	Polychaeta	Terebellida	Cirratulidae	Dodecaceria	fewkesi		species		Berkeley & Berkeley, 1954
	imerss.org:PMLS:4963			Count: few		Andy Lamb								PRESENT				Chone aurantiaca					iNaturalist:356415								Chone aurantiaca							Animalia	Annelida	Polychaeta	Sabellida	Sabellidae	Chone	aurantiaca		species		(Johnson, 1901)
	imerss.org:PMLS:4964			Count: some		Andy Lamb								PRESENT				Myxicola sp.B					iNaturalist:49533								Myxicola infundibulum							Animalia	Annelida	Polychaeta	Sabellida	Sabellidae	Myxicola	infundibulum		species
	imerss.org:PMLS:5051					Andy Lamb		2						PRESENT				Protula pacifica					iNaturalist:538108								Protula pacifica							Animalia	Annelida	Polychaeta	Sabellida	Serpulidae	Protula	pacifica		species		Pixell, 1912
	imerss.org:PMLS:5052			Count: very many		Andy Lamb								PRESENT				Serpula columbiana					iNaturalist:131207								Serpula columbiana							Animalia	Annelida	Polychaeta	Sabellida	Serpulidae	Serpula	columbiana		species		Johnson, 1901
	imerss.org:PMLS:5053			Count: very abundant		Andy Lamb								PRESENT				Dodecaceria fewkesi					iNaturalist:192656								Dodecaceria fewkesi							Animalia	Annelida	Polychaeta	Terebellida	Cirratulidae	Dodecaceria	fewkesi		species		Berkeley & Berkeley, 1954
	imerss.org:PMLS:5054					Andy Lamb		1						PRESENT				Parasabella media					iNaturalist:367054								Parasabella media							Animalia	Annelida	Polychaeta	Sabellida	Sabellidae	Parasabella	media		species		Bush, 1905
	imerss.org:PMLS:5055			Count: few		Andy Lamb								PRESENT				Myxicola sp.B					iNaturalist:49533								Myxicola infundibulum							Animalia	Annelida	Polychaeta	Sabellida	Sabellidae	Myxicola	infundibulum		species
	imerss.org:PMLS:5191					Andy Lamb		2						PRESENT				Protula pacifica					iNaturalist:538108								Protula pacifica							Animalia	Annelida	Polychaeta	Sabellida	Serpulidae	Protula	pacifica		species		Pixell, 1912
	imerss.org:PMLS:5192			Count: very many		Andy Lamb								PRESENT				Serpula columbiana					iNaturalist:131207								Serpula columbiana							Animalia	Annelida	Polychaeta	Sabellida	Serpulidae	Serpula	columbiana		species		Johnson, 1901
	imerss.org:PMLS:5193			Count: abundant		Andy Lamb								PRESENT				Pileolaria spp.					iNaturalist:533325								Pileolaria							Animalia	Annelida	Polychaeta	Sabellida	Serpulidae	Pileolaria			genus
	imerss.org:PMLS:5194			Count: very abundant		Andy Lamb								PRESENT				Dodecaceria fewkesi					iNaturalist:192656								Dodecaceria fewkesi							Animalia	Annelida	Polychaeta	Terebellida	Cirratulidae	Dodecaceria	fewkesi		species		Berkeley & Berkeley, 1954
	imerss.org:PMLS:5195			Count: few		Andy Lamb								PRESENT				Chone aurantiaca					iNaturalist:356415								Chone aurantiaca							Animalia	Annelida	Polychaeta	Sabellida	Sabellidae	Chone	aurantiaca		species		(Johnson, 1901)
	imerss.org:PMLS:5196					Andy Lamb		2						PRESENT				Parasabella media					iNaturalist:367054								Parasabella media							Animalia	Annelida	Polychaeta	Sabellida	Sabellidae	Parasabella	media		species		Bush, 1905
	imerss.org:PMLS:5197			Count: few		Andy Lamb								PRESENT				Myxicola sp.B					iNaturalist:49533								Myxicola infundibulum							Animalia	Annelida	Polychaeta	Sabellida	Sabellidae	Myxicola	infundibulum		species
	imerss.org:PMLS:5297			Count: few		Andy Lamb								PRESENT				Serpula columbiana					iNaturalist:131207								Serpula columbiana							Animalia	Annelida	Polychaeta	Sabellida	Serpulidae	Serpula	columbiana		species		Johnson, 1901
	imerss.org:PMLS:5298			Count: abundant		Andy Lamb								PRESENT				Dodecaceria fewkesi					iNaturalist:192656								Dodecaceria fewkesi							Animalia	Annelida	Polychaeta	Terebellida	Cirratulidae	Dodecaceria	fewkesi		species		Berkeley & Berkeley, 1954
	imerss.org:PMLS:5380			Count: many		Andy Lamb								PRESENT				Serpula columbiana					iNaturalist:131207								Serpula columbiana							Animalia	Annelida	Polychaeta	Sabellida	Serpulidae	Serpula	columbiana		species		Johnson, 1901
	imerss.org:PMLS:5381			Count: very many		Andy Lamb								PRESENT				Pseudochitinopoma occidentalis					iNaturalist:538107								Pseudochitinopoma occidentalis							Animalia	Annelida	Polychaeta	Sabellida	Serpulidae	Pseudochitinopoma	occidentalis		species		(Bush, 1905)
	imerss.org:PMLS:5382			Count: very abundant		Andy Lamb								PRESENT				Dodecaceria fewkesi					iNaturalist:192656								Dodecaceria fewkesi							Animalia	Annelida	Polychaeta	Terebellida	Cirratulidae	Dodecaceria	fewkesi		species		Berkeley & Berkeley, 1954
	imerss.org:PMLS:5383					Andy Lamb		2						PRESENT				Eudistylia vancouveri					iNaturalist:84864								Eudistylia vancouveri							Animalia	Annelida	Polychaeta	Sabellida	Sabellidae	Eudistylia	vancouveri		species		(Kinberg, 1866)
	imerss.org:PMLS:5384			Count: few		Andy Lamb								PRESENT				Myxicola sp.B					iNaturalist:49533								Myxicola infundibulum							Animalia	Annelida	Polychaeta	Sabellida	Sabellidae	Myxicola	infundibulum		species
	imerss.org:PMLS:5385			Count: few		Andy Lamb								PRESENT				Thelepus spp.					iNaturalist:117588								Thelepus							Animalia	Annelida	Polychaeta	Terebellida	Terebellidae	Thelepus			genus
	imerss.org:PMLS:5386			Count: some		Andy Lamb								PRESENT				Phyllochaetopterus sp.					iNaturalist:374226								Phyllochaetopterus							Animalia	Annelida	Polychaeta		Chaetopteridae	Phyllochaetopterus			genus
	imerss.org:PMLS:5486			Count: some		Andy Lamb								PRESENT				Serpula columbiana					iNaturalist:131207								Serpula columbiana							Animalia	Annelida	Polychaeta	Sabellida	Serpulidae	Serpula	columbiana		species		Johnson, 1901
	imerss.org:PMLS:5487			Count: some		Andy Lamb								PRESENT				Pseudochitinopoma occidentalis					iNaturalist:538107								Pseudochitinopoma occidentalis							Animalia	Annelida	Polychaeta	Sabellida	Serpulidae	Pseudochitinopoma	occidentalis		species		(Bush, 1905)
	imerss.org:PMLS:5488			Count: some		Andy Lamb								PRESENT				Dodecaceria fewkesi					iNaturalist:192656								Dodecaceria fewkesi							Animalia	Annelida	Polychaeta	Terebellida	Cirratulidae	Dodecaceria	fewkesi		species		Berkeley & Berkeley, 1954
	imerss.org:PMLS:5489			Count: few		Andy Lamb								PRESENT				Myxicola sp.B					iNaturalist:49533								Myxicola infundibulum							Animalia	Annelida	Polychaeta	Sabellida	Sabellidae	Myxicola	infundibulum		species
	imerss.org:PMLS:5490					Andy Lamb		1						PRESENT				Bispira pacifica					iNaturalist:1199401								Bispira pacifica							Animalia	Annelida	Polychaeta	Sabellida	Sabellidae	Bispira	pacifica		species		(Berkeley & Berkeley, 1954)
	imerss.org:PMLS:5573			Count: some		Andy Lamb								PRESENT				Serpula columbiana					iNaturalist:131207								Serpula columbiana							Animalia	Annelida	Polychaeta	Sabellida	Serpulidae	Serpula	columbiana		species		Johnson, 1901
	imerss.org:PMLS:5574					Andy Lamb		1						PRESENT				Myxicola sp.B					iNaturalist:49533								Myxicola infundibulum							Animalia	Annelida	Polychaeta	Sabellida	Sabellidae	Myxicola	infundibulum		species
	imerss.org:PMLS:5658			Count: some		Andy Lamb								PRESENT				Serpula columbiana					iNaturalist:131207								Serpula columbiana							Animalia	Annelida	Polychaeta	Sabellida	Serpulidae	Serpula	columbiana		species		Johnson, 1901
	imerss.org:PMLS:5659			Count: very many		Andy Lamb								PRESENT				Pseudochitinopoma occidentalis					iNaturalist:538107								Pseudochitinopoma occidentalis							Animalia	Annelida	Polychaeta	Sabellida	Serpulidae	Pseudochitinopoma	occidentalis		species		(Bush, 1905)
	imerss.org:PMLS:5660			Count: abundant		Andy Lamb								PRESENT				Dodecaceria fewkesi					iNaturalist:192656								Dodecaceria fewkesi							Animalia	Annelida	Polychaeta	Terebellida	Cirratulidae	Dodecaceria	fewkesi		species		Berkeley & Berkeley, 1954
	imerss.org:PMLS:5661			Count: some		Andy Lamb								PRESENT				Eudistylia vancouveri					iNaturalist:84864								Eudistylia vancouveri							Animalia	Annelida	Polychaeta	Sabellida	Sabellidae	Eudistylia	vancouveri		species		(Kinberg, 1866)
	imerss.org:PMLS:5662			Count: few		Andy Lamb								PRESENT				Schizobranchia insignis					iNaturalist:339561								Schizobranchia insignis							Animalia	Annelida	Polychaeta	Sabellida	Sabellidae	Schizobranchia	insignis		species		Bush, 1905
	imerss.org:PMLS:5759			Count: some		Andy Lamb								PRESENT				Serpula columbiana					iNaturalist:131207								Serpula columbiana							Animalia	Annelida	Polychaeta	Sabellida	Serpulidae	Serpula	columbiana		species		Johnson, 1901
	imerss.org:PMLS:5760			Count: some		Andy Lamb								PRESENT				Dodecaceria fewkesi					iNaturalist:192656								Dodecaceria fewkesi							Animalia	Annelida	Polychaeta	Terebellida	Cirratulidae	Dodecaceria	fewkesi		species		Berkeley & Berkeley, 1954
	imerss.org:PMLS:5761			Count: few		Andy Lamb								PRESENT				Pista elongata					iNaturalist:338339								Pista elongata							Animalia	Annelida	Polychaeta	Terebellida	Terebellidae	Pista	elongata		species		Moore, 1909
	imerss.org:PMLS:5854			Count: some		Andy Lamb								PRESENT				Protula pacifica					iNaturalist:538108								Protula pacifica							Animalia	Annelida	Polychaeta	Sabellida	Serpulidae	Protula	pacifica		species		Pixell, 1912
	imerss.org:PMLS:5855			Count: many		Andy Lamb								PRESENT				Serpula columbiana					iNaturalist:131207								Serpula columbiana							Animalia	Annelida	Polychaeta	Sabellida	Serpulidae	Serpula	columbiana		species		Johnson, 1901
	imerss.org:PMLS:5856			Count: many		Andy Lamb								PRESENT				Pseudochitinopoma occidentalis					iNaturalist:538107								Pseudochitinopoma occidentalis							Animalia	Annelida	Polychaeta	Sabellida	Serpulidae	Pseudochitinopoma	occidentalis		species		(Bush, 1905)
	imerss.org:PMLS:5857			Count: many		Andy Lamb								PRESENT				Crucigera spp.					iNaturalist:543578								Crucigera							Animalia	Annelida	Polychaeta	Sabellida	Serpulidae	Crucigera			genus
	imerss.org:PMLS:5858			Count: very abundant		Andy Lamb								PRESENT				Dodecaceria fewkesi					iNaturalist:192656								Dodecaceria fewkesi							Animalia	Annelida	Polychaeta	Terebellida	Cirratulidae	Dodecaceria	fewkesi		species		Berkeley & Berkeley, 1954
	imerss.org:PMLS:5859			Count: few		Andy Lamb								PRESENT				Eudistylia vancouveri					iNaturalist:84864								Eudistylia vancouveri							Animalia	Annelida	Polychaeta	Sabellida	Sabellidae	Eudistylia	vancouveri		species		(Kinberg, 1866)
	imerss.org:PMLS:5860			Count: few		Andy Lamb								PRESENT				Myxicola sp.B					iNaturalist:49533								Myxicola infundibulum							Animalia	Annelida	Polychaeta	Sabellida	Sabellidae	Myxicola	infundibulum		species
	imerss.org:PMLS:5861			Count: few		Andy Lamb								PRESENT				Pista elongata					iNaturalist:338339								Pista elongata							Animalia	Annelida	Polychaeta	Terebellida	Terebellidae	Pista	elongata		species		Moore, 1909
	imerss.org:PMLS:5988			Count: very many		Andy Lamb								PRESENT				Serpula columbiana					iNaturalist:131207								Serpula columbiana							Animalia	Annelida	Polychaeta	Sabellida	Serpulidae	Serpula	columbiana		species		Johnson, 1901
	imerss.org:PMLS:5989			Count: abundant		Andy Lamb								PRESENT				Dodecaceria fewkesi					iNaturalist:192656								Dodecaceria fewkesi							Animalia	Annelida	Polychaeta	Terebellida	Cirratulidae	Dodecaceria	fewkesi		species		Berkeley & Berkeley, 1954
	imerss.org:PMLS:5990			Count: very many		Andy Lamb								PRESENT				Parasabella media					iNaturalist:367054								Parasabella media							Animalia	Annelida	Polychaeta	Sabellida	Sabellidae	Parasabella	media		species		Bush, 1905
	imerss.org:PMLS:5991			Count: very many		Andy Lamb								PRESENT				Eudistylia vancouveri					iNaturalist:84864								Eudistylia vancouveri							Animalia	Annelida	Polychaeta	Sabellida	Sabellidae	Eudistylia	vancouveri		species		(Kinberg, 1866)
	imerss.org:PMLS:6085			Count: many		Andy Lamb								PRESENT				Serpula columbiana					iNaturalist:131207								Serpula columbiana							Animalia	Annelida	Polychaeta	Sabellida	Serpulidae	Serpula	columbiana		species		Johnson, 1901
	imerss.org:PMLS:6086			Count: some		Andy Lamb								PRESENT				Pseudochitinopoma occidentalis					iNaturalist:538107								Pseudochitinopoma occidentalis							Animalia	Annelida	Polychaeta	Sabellida	Serpulidae	Pseudochitinopoma	occidentalis		species		(Bush, 1905)
	imerss.org:PMLS:6087			Count: very many		Andy Lamb								PRESENT				Dodecaceria fewkesi					iNaturalist:192656								Dodecaceria fewkesi							Animalia	Annelida	Polychaeta	Terebellida	Cirratulidae	Dodecaceria	fewkesi		species		Berkeley & Berkeley, 1954
	imerss.org:PMLS:6088			Count: some		Andy Lamb								PRESENT				Parasabella media					iNaturalist:367054								Parasabella media							Animalia	Annelida	Polychaeta	Sabellida	Sabellidae	Parasabella	media		species		Bush, 1905
	imerss.org:PMLS:6089			Count: very many		Andy Lamb								PRESENT				Eudistylia vancouveri					iNaturalist:84864								Eudistylia vancouveri							Animalia	Annelida	Polychaeta	Sabellida	Sabellidae	Eudistylia	vancouveri		species		(Kinberg, 1866)
	imerss.org:PMLS:6090			Count: very many		Andy Lamb								PRESENT				Pista elongata					iNaturalist:338339								Pista elongata							Animalia	Annelida	Polychaeta	Terebellida	Terebellidae	Pista	elongata		species		Moore, 1909
	imerss.org:PMLS:6091			Count: few		Andy Lamb								PRESENT				Thelepus spp.					iNaturalist:117588								Thelepus							Animalia	Annelida	Polychaeta	Terebellida	Terebellidae	Thelepus			genus
	imerss.org:PMLS:6203					Andy Lamb		1						PRESENT				Nereis spp.					iNaturalist:81791								Nereis							Animalia	Annelida	Polychaeta	Phyllodocida	Nereididae	Nereis			genus
	imerss.org:PMLS:6204			Count: few		Andy Lamb								PRESENT				Apomatus geniculatus					iNaturalist:939557								Apomatus geniculatus							Animalia	Annelida	Polychaeta	Sabellida	Serpulidae	Apomatus	geniculatus		species		(Moore & Bush, 1904)
	imerss.org:PMLS:6205			Count: very abundant		Andy Lamb								PRESENT				Serpula columbiana					iNaturalist:131207								Serpula columbiana							Animalia	Annelida	Polychaeta	Sabellida	Serpulidae	Serpula	columbiana		species		Johnson, 1901
	imerss.org:PMLS:6206			Count: some		Andy Lamb								PRESENT				Pseudochitinopoma occidentalis					iNaturalist:538107								Pseudochitinopoma occidentalis							Animalia	Annelida	Polychaeta	Sabellida	Serpulidae	Pseudochitinopoma	occidentalis		species		(Bush, 1905)
	imerss.org:PMLS:6207			Count: very abundant		Andy Lamb								PRESENT				Dodecaceria fewkesi					iNaturalist:192656								Dodecaceria fewkesi							Animalia	Annelida	Polychaeta	Terebellida	Cirratulidae	Dodecaceria	fewkesi		species		Berkeley & Berkeley, 1954
	imerss.org:PMLS:6208			Count: few		Andy Lamb								PRESENT				Parasabella media					iNaturalist:367054								Parasabella media							Animalia	Annelida	Polychaeta	Sabellida	Sabellidae	Parasabella	media		species		Bush, 1905
	imerss.org:PMLS:6209			Count: many		Andy Lamb								PRESENT				Eudistylia vancouveri					iNaturalist:84864								Eudistylia vancouveri							Animalia	Annelida	Polychaeta	Sabellida	Sabellidae	Eudistylia	vancouveri		species		(Kinberg, 1866)
	imerss.org:PMLS:6210			Count: few		Andy Lamb								PRESENT				Myxicola sp.B					iNaturalist:49533								Myxicola infundibulum							Animalia	Annelida	Polychaeta	Sabellida	Sabellidae	Myxicola	infundibulum		species
	imerss.org:PMLS:6300			Count: many		Andy Lamb								PRESENT				Serpula columbiana					iNaturalist:131207								Serpula columbiana							Animalia	Annelida	Polychaeta	Sabellida	Serpulidae	Serpula	columbiana		species		Johnson, 1901
	imerss.org:PMLS:6301			Count: many		Andy Lamb								PRESENT				Dodecaceria fewkesi					iNaturalist:192656								Dodecaceria fewkesi							Animalia	Annelida	Polychaeta	Terebellida	Cirratulidae	Dodecaceria	fewkesi		species		Berkeley & Berkeley, 1954
	imerss.org:PMLS:6392			Count: some		Andy Lamb								PRESENT				Protula pacifica					iNaturalist:538108								Protula pacifica							Animalia	Annelida	Polychaeta	Sabellida	Serpulidae	Protula	pacifica		species		Pixell, 1912
	imerss.org:PMLS:6393			Count: very abundant		Andy Lamb								PRESENT				Serpula columbiana					iNaturalist:131207								Serpula columbiana							Animalia	Annelida	Polychaeta	Sabellida	Serpulidae	Serpula	columbiana		species		Johnson, 1901
	imerss.org:PMLS:6394			Count: some		Andy Lamb								PRESENT				Pseudochitinopoma occidentalis					iNaturalist:538107								Pseudochitinopoma occidentalis							Animalia	Annelida	Polychaeta	Sabellida	Serpulidae	Pseudochitinopoma	occidentalis		species		(Bush, 1905)
	imerss.org:PMLS:6395			Count: very abundant		Andy Lamb								PRESENT				Dodecaceria fewkesi					iNaturalist:192656								Dodecaceria fewkesi							Animalia	Annelida	Polychaeta	Terebellida	Cirratulidae	Dodecaceria	fewkesi		species		Berkeley & Berkeley, 1954
	imerss.org:PMLS:6396			Count: some		Andy Lamb								PRESENT				Eudistylia vancouveri					iNaturalist:84864								Eudistylia vancouveri							Animalia	Annelida	Polychaeta	Sabellida	Sabellidae	Eudistylia	vancouveri		species		(Kinberg, 1866)
	imerss.org:PMLS:6397			Count: few		Andy Lamb								PRESENT				Thelepus spp.					iNaturalist:117588								Thelepus							Animalia	Annelida	Polychaeta	Terebellida	Terebellidae	Thelepus			genus
	imerss.org:PMLS:6491			Count: very many		Andy Lamb								PRESENT				Serpula columbiana					iNaturalist:131207								Serpula columbiana							Animalia	Annelida	Polychaeta	Sabellida	Serpulidae	Serpula	columbiana		species		Johnson, 1901
	imerss.org:PMLS:6492			Count: some		Andy Lamb								PRESENT				Pileolaria spp.					iNaturalist:533325								Pileolaria							Animalia	Annelida	Polychaeta	Sabellida	Serpulidae	Pileolaria			genus
	imerss.org:PMLS:6493			Count: very many		Andy Lamb								PRESENT				Dodecaceria fewkesi					iNaturalist:192656								Dodecaceria fewkesi							Animalia	Annelida	Polychaeta	Terebellida	Cirratulidae	Dodecaceria	fewkesi		species		Berkeley & Berkeley, 1954
	imerss.org:PMLS:6494			Count: some		Andy Lamb								PRESENT				Parasabella media					iNaturalist:367054								Parasabella media							Animalia	Annelida	Polychaeta	Sabellida	Sabellidae	Parasabella	media		species		Bush, 1905
	imerss.org:PMLS:6495			Count: very many		Andy Lamb								PRESENT				Eudistylia vancouveri					iNaturalist:84864								Eudistylia vancouveri							Animalia	Annelida	Polychaeta	Sabellida	Sabellidae	Eudistylia	vancouveri		species		(Kinberg, 1866)
	imerss.org:PMLS:6496			Count: some		Andy Lamb								PRESENT				Thelepus spp.					iNaturalist:117588								Thelepus							Animalia	Annelida	Polychaeta	Terebellida	Terebellidae	Thelepus			genus
	imerss.org:PMLS:6566			Count: some		Andy Lamb								PRESENT				Protula pacifica					iNaturalist:538108								Protula pacifica							Animalia	Annelida	Polychaeta	Sabellida	Serpulidae	Protula	pacifica		species		Pixell, 1912
	imerss.org:PMLS:6567			Count: abundant		Andy Lamb								PRESENT				Serpula columbiana					iNaturalist:131207								Serpula columbiana							Animalia	Annelida	Polychaeta	Sabellida	Serpulidae	Serpula	columbiana		species		Johnson, 1901
	imerss.org:PMLS:6568			Count: some		Andy Lamb								PRESENT				Pileolaria spp.					iNaturalist:533325								Pileolaria							Animalia	Annelida	Polychaeta	Sabellida	Serpulidae	Pileolaria			genus
	imerss.org:PMLS:6569			Count: abundant		Andy Lamb								PRESENT				Dodecaceria fewkesi					iNaturalist:192656								Dodecaceria fewkesi							Animalia	Annelida	Polychaeta	Terebellida	Cirratulidae	Dodecaceria	fewkesi		species		Berkeley & Berkeley, 1954
	imerss.org:PMLS:6570			Count: few		Andy Lamb								PRESENT				Parasabella media					iNaturalist:367054								Parasabella media							Animalia	Annelida	Polychaeta	Sabellida	Sabellidae	Parasabella	media		species		Bush, 1905
	imerss.org:PMLS:6571			Count: few		Andy Lamb								PRESENT				Eudistylia vancouveri					iNaturalist:84864								Eudistylia vancouveri							Animalia	Annelida	Polychaeta	Sabellida	Sabellidae	Eudistylia	vancouveri		species		(Kinberg, 1866)
	imerss.org:PMLS:6572			Count: few		Andy Lamb								PRESENT				Myxicola sp.B					iNaturalist:49533								Myxicola infundibulum							Animalia	Annelida	Polychaeta	Sabellida	Sabellidae	Myxicola	infundibulum		species
	imerss.org:PMLS:6573			Count: few		Andy Lamb								PRESENT				Phyllochaetopterus sp.					iNaturalist:374226								Phyllochaetopterus							Animalia	Annelida	Polychaeta		Chaetopteridae	Phyllochaetopterus			genus
	imerss.org:PMLS:6660			Count: some		Andy Lamb								PRESENT				Serpula columbiana					iNaturalist:131207								Serpula columbiana							Animalia	Annelida	Polychaeta	Sabellida	Serpulidae	Serpula	columbiana		species		Johnson, 1901
	imerss.org:PMLS:6661			Count: few		Andy Lamb								PRESENT				Chone aurantiaca					iNaturalist:356415								Chone aurantiaca							Animalia	Annelida	Polychaeta	Sabellida	Sabellidae	Chone	aurantiaca		species		(Johnson, 1901)
	imerss.org:PMLS:6662			Count: some		Andy Lamb								PRESENT				Pista elongata					iNaturalist:338339								Pista elongata							Animalia	Annelida	Polychaeta	Terebellida	Terebellidae	Pista	elongata		species		Moore, 1909
	imerss.org:PMLS:6757			Count: very many		Andy Lamb								PRESENT				Serpula columbiana					iNaturalist:131207								Serpula columbiana							Animalia	Annelida	Polychaeta	Sabellida	Serpulidae	Serpula	columbiana		species		Johnson, 1901
	imerss.org:PMLS:6758			Count: some		Andy Lamb								PRESENT				Pseudochitinopoma occidentalis					iNaturalist:538107								Pseudochitinopoma occidentalis							Animalia	Annelida	Polychaeta	Sabellida	Serpulidae	Pseudochitinopoma	occidentalis		species		(Bush, 1905)
	imerss.org:PMLS:6759			Count: many		Andy Lamb								PRESENT				Dodecaceria concharum					iNaturalist:464813								Dodecaceria concharum							Animalia	Annelida	Polychaeta	Terebellida	Cirratulidae	Dodecaceria	concharum		species		Örsted, 1843
	imerss.org:PMLS:6760			Count: very many		Andy Lamb								PRESENT				Dodecaceria fewkesi					iNaturalist:192656								Dodecaceria fewkesi							Animalia	Annelida	Polychaeta	Terebellida	Cirratulidae	Dodecaceria	fewkesi		species		Berkeley & Berkeley, 1954
	imerss.org:PMLS:6761			Count: few		Andy Lamb								PRESENT				Parasabella media					iNaturalist:367054								Parasabella media							Animalia	Annelida	Polychaeta	Sabellida	Sabellidae	Parasabella	media		species		Bush, 1905
	imerss.org:PMLS:6762			Count: few		Andy Lamb								PRESENT				Eudistylia vancouveri					iNaturalist:84864								Eudistylia vancouveri							Animalia	Annelida	Polychaeta	Sabellida	Sabellidae	Eudistylia	vancouveri		species		(Kinberg, 1866)
	imerss.org:PMLS:6763			Count: few		Andy Lamb								PRESENT				Myxicola sp.B					iNaturalist:49533								Myxicola infundibulum							Animalia	Annelida	Polychaeta	Sabellida	Sabellidae	Myxicola	infundibulum		species
	imerss.org:PMLS:6863					Andy Lamb		1						PRESENT				Arctonoe fragilis					iNaturalist:69914								Arctonoe fragilis							Animalia	Annelida	Polychaeta	Phyllodocida	Polynoidae	Arctonoe	fragilis		species		(Baird, 1863)
	imerss.org:PMLS:6864			Count: some		Andy Lamb								PRESENT				Serpula columbiana					iNaturalist:131207								Serpula columbiana							Animalia	Annelida	Polychaeta	Sabellida	Serpulidae	Serpula	columbiana		species		Johnson, 1901
	imerss.org:PMLS:6865			Count: some		Andy Lamb								PRESENT				Pseudochitinopoma occidentalis					iNaturalist:538107								Pseudochitinopoma occidentalis							Animalia	Annelida	Polychaeta	Sabellida	Serpulidae	Pseudochitinopoma	occidentalis		species		(Bush, 1905)
	imerss.org:PMLS:6866			Count: very many		Andy Lamb								PRESENT				Dodecaceria fewkesi					iNaturalist:192656								Dodecaceria fewkesi							Animalia	Annelida	Polychaeta	Terebellida	Cirratulidae	Dodecaceria	fewkesi		species		Berkeley & Berkeley, 1954
	imerss.org:PMLS:6867					Andy Lamb		1						PRESENT				Chone aurantiaca					iNaturalist:356415								Chone aurantiaca							Animalia	Annelida	Polychaeta	Sabellida	Sabellidae	Chone	aurantiaca		species		(Johnson, 1901)
	imerss.org:PMLS:6868			Count: few		Andy Lamb								PRESENT				Parasabella media					iNaturalist:367054								Parasabella media							Animalia	Annelida	Polychaeta	Sabellida	Sabellidae	Parasabella	media		species		Bush, 1905
	imerss.org:PMLS:6869			Count: few		Andy Lamb								PRESENT				Eudistylia vancouveri					iNaturalist:84864								Eudistylia vancouveri							Animalia	Annelida	Polychaeta	Sabellida	Sabellidae	Eudistylia	vancouveri		species		(Kinberg, 1866)
	imerss.org:PMLS:6870			Count: very many		Andy Lamb								PRESENT				Myxicola sp.B					iNaturalist:49533								Myxicola infundibulum							Animalia	Annelida	Polychaeta	Sabellida	Sabellidae	Myxicola	infundibulum		species
	imerss.org:PMLS:6871			Count: very many		Andy Lamb								PRESENT				Pista elongata					iNaturalist:338339								Pista elongata							Animalia	Annelida	Polychaeta	Terebellida	Terebellidae	Pista	elongata		species		Moore, 1909
	imerss.org:PMLS:6987			Count: few		Andy Lamb								PRESENT				Protula pacifica					iNaturalist:538108								Protula pacifica							Animalia	Annelida	Polychaeta	Sabellida	Serpulidae	Protula	pacifica		species		Pixell, 1912
	imerss.org:PMLS:6988			Count: abundant		Andy Lamb								PRESENT				Serpula columbiana					iNaturalist:131207								Serpula columbiana							Animalia	Annelida	Polychaeta	Sabellida	Serpulidae	Serpula	columbiana		species		Johnson, 1901
	imerss.org:PMLS:6989			Count: some		Andy Lamb								PRESENT				Pseudochitinopoma occidentalis					iNaturalist:538107								Pseudochitinopoma occidentalis							Animalia	Annelida	Polychaeta	Sabellida	Serpulidae	Pseudochitinopoma	occidentalis		species		(Bush, 1905)
	imerss.org:PMLS:6990			Count: very abundant		Andy Lamb								PRESENT				Dodecaceria fewkesi					iNaturalist:192656								Dodecaceria fewkesi							Animalia	Annelida	Polychaeta	Terebellida	Cirratulidae	Dodecaceria	fewkesi		species		Berkeley & Berkeley, 1954
	imerss.org:PMLS:6991			Count: few		Andy Lamb								PRESENT				Parasabella media					iNaturalist:367054								Parasabella media							Animalia	Annelida	Polychaeta	Sabellida	Sabellidae	Parasabella	media		species		Bush, 1905
	imerss.org:PMLS:6992			Count: few		Andy Lamb								PRESENT				Eudistylia vancouveri					iNaturalist:84864								Eudistylia vancouveri							Animalia	Annelida	Polychaeta	Sabellida	Sabellidae	Eudistylia	vancouveri		species		(Kinberg, 1866)
	imerss.org:PMLS:6993			Count: few		Andy Lamb								PRESENT				Schizobranchia insignis					iNaturalist:339561								Schizobranchia insignis							Animalia	Annelida	Polychaeta	Sabellida	Sabellidae	Schizobranchia	insignis		species		Bush, 1905
	imerss.org:PMLS:6994			Count: some		Andy Lamb								PRESENT				Myxicola sp.B					iNaturalist:49533								Myxicola infundibulum							Animalia	Annelida	Polychaeta	Sabellida	Sabellidae	Myxicola	infundibulum		species
	imerss.org:PMLS:6995			Count: few		Andy Lamb								PRESENT				Pista elongata					iNaturalist:338339								Pista elongata							Animalia	Annelida	Polychaeta	Terebellida	Terebellidae	Pista	elongata		species		Moore, 1909
	imerss.org:PMLS:6996			Count: few		Andy Lamb								PRESENT				Thelepus spp.					iNaturalist:117588								Thelepus							Animalia	Annelida	Polychaeta	Terebellida	Terebellidae	Thelepus			genus
	imerss.org:PMLS:7125			Count: few		Andy Lamb								PRESENT				Protula pacifica					iNaturalist:538108								Protula pacifica							Animalia	Annelida	Polychaeta	Sabellida	Serpulidae	Protula	pacifica		species		Pixell, 1912
	imerss.org:PMLS:7126			Count: abundant		Andy Lamb								PRESENT				Serpula columbiana					iNaturalist:131207								Serpula columbiana							Animalia	Annelida	Polychaeta	Sabellida	Serpulidae	Serpula	columbiana		species		Johnson, 1901
	imerss.org:PMLS:7127			Count: very abundant		Andy Lamb								PRESENT				Dodecaceria fewkesi					iNaturalist:192656								Dodecaceria fewkesi							Animalia	Annelida	Polychaeta	Terebellida	Cirratulidae	Dodecaceria	fewkesi		species		Berkeley & Berkeley, 1954
	imerss.org:PMLS:7128			Count: few		Andy Lamb								PRESENT				Myxicola sp.B					iNaturalist:49533								Myxicola infundibulum							Animalia	Annelida	Polychaeta	Sabellida	Sabellidae	Myxicola	infundibulum		species
	imerss.org:PMLS:7129			Count: few		Andy Lamb								PRESENT				Thelepus spp.					iNaturalist:117588								Thelepus							Animalia	Annelida	Polychaeta	Terebellida	Terebellidae	Thelepus			genus
	imerss.org:PMLS:7218			Count: few		Andy Lamb								PRESENT				Arctonoe fragilis					iNaturalist:69914								Arctonoe fragilis							Animalia	Annelida	Polychaeta	Phyllodocida	Polynoidae	Arctonoe	fragilis		species		(Baird, 1863)
	imerss.org:PMLS:7219					Andy Lamb		2						PRESENT				Chone aurantiaca					iNaturalist:356415								Chone aurantiaca							Animalia	Annelida	Polychaeta	Sabellida	Sabellidae	Chone	aurantiaca		species		(Johnson, 1901)
	imerss.org:PMLS:7220			Count: many		Andy Lamb								PRESENT				Myxicola sp.B					iNaturalist:49533								Myxicola infundibulum							Animalia	Annelida	Polychaeta	Sabellida	Sabellidae	Myxicola	infundibulum		species
	imerss.org:PMLS:7221			Count: few		Andy Lamb								PRESENT				Bispira pacifica					iNaturalist:1199401								Bispira pacifica							Animalia	Annelida	Polychaeta	Sabellida	Sabellidae	Bispira	pacifica		species		(Berkeley & Berkeley, 1954)
	imerss.org:PMLS:7282			Count: few		Andy Lamb								PRESENT				Diopatra ornata					iNaturalist:339286								Diopatra ornata							Animalia	Annelida	Polychaeta	Eunicida	Onuphidae	Diopatra	ornata		species		Moore, 1911
	imerss.org:PMLS:7283			Count: few		Andy Lamb								PRESENT				Arctonoe fragilis					iNaturalist:69914								Arctonoe fragilis							Animalia	Annelida	Polychaeta	Phyllodocida	Polynoidae	Arctonoe	fragilis		species		(Baird, 1863)
	imerss.org:PMLS:7284			Count: some		Andy Lamb								PRESENT				Protula pacifica					iNaturalist:538108								Protula pacifica							Animalia	Annelida	Polychaeta	Sabellida	Serpulidae	Protula	pacifica		species		Pixell, 1912
	imerss.org:PMLS:7285			Count: some		Andy Lamb								PRESENT				Serpula columbiana					iNaturalist:131207								Serpula columbiana							Animalia	Annelida	Polychaeta	Sabellida	Serpulidae	Serpula	columbiana		species		Johnson, 1901
	imerss.org:PMLS:7286			Count: very many		Andy Lamb								PRESENT				Dodecaceria fewkesi					iNaturalist:192656								Dodecaceria fewkesi							Animalia	Annelida	Polychaeta	Terebellida	Cirratulidae	Dodecaceria	fewkesi		species		Berkeley & Berkeley, 1954
	imerss.org:PMLS:7287			Count: few		Andy Lamb								PRESENT				Chone aurantiaca					iNaturalist:356415								Chone aurantiaca							Animalia	Annelida	Polychaeta	Sabellida	Sabellidae	Chone	aurantiaca		species		(Johnson, 1901)
	imerss.org:PMLS:7288			Count: very many		Andy Lamb								PRESENT				Myxicola sp.B					iNaturalist:49533								Myxicola infundibulum							Animalia	Annelida	Polychaeta	Sabellida	Sabellidae	Myxicola	infundibulum		species
	imerss.org:PMLS:7289					Andy Lamb		1						PRESENT				Bispira pacifica					iNaturalist:1199401								Bispira pacifica							Animalia	Annelida	Polychaeta	Sabellida	Sabellidae	Bispira	pacifica		species		(Berkeley & Berkeley, 1954)
	imerss.org:PMLS:7402					Andy Lamb		2						PRESENT				Arctonoe pulchra					iNaturalist:465156								Arctonoe pulchra							Animalia	Annelida	Polychaeta	Phyllodocida	Polynoidae	Arctonoe	pulchra		species		(Johnson, 1897)
	imerss.org:PMLS:7403			Count: few		Andy Lamb								PRESENT				Apomatus geniculatus					iNaturalist:939557								Apomatus geniculatus							Animalia	Annelida	Polychaeta	Sabellida	Serpulidae	Apomatus	geniculatus		species		(Moore & Bush, 1904)
	imerss.org:PMLS:7404			Count: abundant		Andy Lamb								PRESENT				Serpula columbiana					iNaturalist:131207								Serpula columbiana							Animalia	Annelida	Polychaeta	Sabellida	Serpulidae	Serpula	columbiana		species		Johnson, 1901
	imerss.org:PMLS:7405			Count: very abundant		Andy Lamb								PRESENT				Dodecaceria fewkesi					iNaturalist:192656								Dodecaceria fewkesi							Animalia	Annelida	Polychaeta	Terebellida	Cirratulidae	Dodecaceria	fewkesi		species		Berkeley & Berkeley, 1954
	imerss.org:PMLS:7406			Count: few		Andy Lamb								PRESENT				Chone aurantiaca					iNaturalist:356415								Chone aurantiaca							Animalia	Annelida	Polychaeta	Sabellida	Sabellidae	Chone	aurantiaca		species		(Johnson, 1901)
	imerss.org:PMLS:7407			Count: few		Andy Lamb								PRESENT				Eudistylia vancouveri					iNaturalist:84864								Eudistylia vancouveri							Animalia	Annelida	Polychaeta	Sabellida	Sabellidae	Eudistylia	vancouveri		species		(Kinberg, 1866)
	imerss.org:PMLS:7408			Count: some		Andy Lamb								PRESENT				Myxicola sp.B					iNaturalist:49533								Myxicola infundibulum							Animalia	Annelida	Polychaeta	Sabellida	Sabellidae	Myxicola	infundibulum		species
	imerss.org:PMLS:7409			Count: some		Andy Lamb								PRESENT				Thelepus spp.					iNaturalist:117588								Thelepus							Animalia	Annelida	Polychaeta	Terebellida	Terebellidae	Thelepus			genus
	imerss.org:PMLS:7410			Count: some		Andy Lamb								PRESENT				Phyllochaetopterus prolifica					iNaturalist:467241								Phyllochaetopterus prolifica							Animalia	Annelida	Polychaeta		Chaetopteridae	Phyllochaetopterus	prolifica		species		Potts, 1914
	imerss.org:PMLS:7518			Count: few		Andy Lamb								PRESENT				Protula pacifica					iNaturalist:538108								Protula pacifica							Animalia	Annelida	Polychaeta	Sabellida	Serpulidae	Protula	pacifica		species		Pixell, 1912
	imerss.org:PMLS:7519			Count: abundant		Andy Lamb								PRESENT				Serpula columbiana					iNaturalist:131207								Serpula columbiana							Animalia	Annelida	Polychaeta	Sabellida	Serpulidae	Serpula	columbiana		species		Johnson, 1901
	imerss.org:PMLS:7520			Count: many		Andy Lamb								PRESENT				Pseudochitinopoma occidentalis					iNaturalist:538107								Pseudochitinopoma occidentalis							Animalia	Annelida	Polychaeta	Sabellida	Serpulidae	Pseudochitinopoma	occidentalis		species		(Bush, 1905)
	imerss.org:PMLS:7521			Count: abundant		Andy Lamb								PRESENT				Dodecaceria fewkesi					iNaturalist:192656								Dodecaceria fewkesi							Animalia	Annelida	Polychaeta	Terebellida	Cirratulidae	Dodecaceria	fewkesi		species		Berkeley & Berkeley, 1954
	imerss.org:PMLS:7522			Count: few		Andy Lamb								PRESENT				Eudistylia vancouveri					iNaturalist:84864								Eudistylia vancouveri							Animalia	Annelida	Polychaeta	Sabellida	Sabellidae	Eudistylia	vancouveri		species		(Kinberg, 1866)
	imerss.org:PMLS:7523			Count: few		Andy Lamb								PRESENT				Thelepus spp.					iNaturalist:117588								Thelepus							Animalia	Annelida	Polychaeta	Terebellida	Terebellidae	Thelepus			genus
	imerss.org:PMLS:7617					Andy Lamb		1						PRESENT				Diopatra ornata					iNaturalist:339286								Diopatra ornata							Animalia	Annelida	Polychaeta	Eunicida	Onuphidae	Diopatra	ornata		species		Moore, 1911
	imerss.org:PMLS:7618			Count: many		Andy Lamb								PRESENT				Protula pacifica					iNaturalist:538108								Protula pacifica							Animalia	Annelida	Polychaeta	Sabellida	Serpulidae	Protula	pacifica		species		Pixell, 1912
	imerss.org:PMLS:7619			Count: very many		Andy Lamb								PRESENT				Serpula columbiana					iNaturalist:131207								Serpula columbiana							Animalia	Annelida	Polychaeta	Sabellida	Serpulidae	Serpula	columbiana		species		Johnson, 1901
	imerss.org:PMLS:7620			Count: very many		Andy Lamb								PRESENT				Pseudochitinopoma occidentalis					iNaturalist:538107								Pseudochitinopoma occidentalis							Animalia	Annelida	Polychaeta	Sabellida	Serpulidae	Pseudochitinopoma	occidentalis		species		(Bush, 1905)
	imerss.org:PMLS:7621			Count: many		Andy Lamb								PRESENT				Dodecaceria fewkesi					iNaturalist:192656								Dodecaceria fewkesi							Animalia	Annelida	Polychaeta	Terebellida	Cirratulidae	Dodecaceria	fewkesi		species		Berkeley & Berkeley, 1954
	imerss.org:PMLS:7622					Andy Lamb		1						PRESENT				Chone aurantiaca					iNaturalist:356415								Chone aurantiaca							Animalia	Annelida	Polychaeta	Sabellida	Sabellidae	Chone	aurantiaca		species		(Johnson, 1901)
	imerss.org:PMLS:7623			Count: few		Andy Lamb								PRESENT				Schizobranchia insignis					iNaturalist:339561								Schizobranchia insignis							Animalia	Annelida	Polychaeta	Sabellida	Sabellidae	Schizobranchia	insignis		species		Bush, 1905
	imerss.org:PMLS:7624			Count: some		Andy Lamb								PRESENT				Myxicola sp.B					iNaturalist:49533								Myxicola infundibulum							Animalia	Annelida	Polychaeta	Sabellida	Sabellidae	Myxicola	infundibulum		species
	imerss.org:PMLS:7724			Count: many		Andy Lamb								PRESENT				Serpula columbiana					iNaturalist:131207								Serpula columbiana							Animalia	Annelida	Polychaeta	Sabellida	Serpulidae	Serpula	columbiana		species		Johnson, 1901
	imerss.org:PMLS:7725			Count: abundant		Andy Lamb								PRESENT				Dodecaceria fewkesi					iNaturalist:192656								Dodecaceria fewkesi							Animalia	Annelida	Polychaeta	Terebellida	Cirratulidae	Dodecaceria	fewkesi		species		Berkeley & Berkeley, 1954
	imerss.org:PMLS:7726			Count: few		Andy Lamb								PRESENT				Eudistylia vancouveri					iNaturalist:84864								Eudistylia vancouveri							Animalia	Annelida	Polychaeta	Sabellida	Sabellidae	Eudistylia	vancouveri		species		(Kinberg, 1866)
	imerss.org:PMLS:7829			Count: some		Andy Lamb								PRESENT				Serpula columbiana					iNaturalist:131207								Serpula columbiana							Animalia	Annelida	Polychaeta	Sabellida	Serpulidae	Serpula	columbiana		species		Johnson, 1901
	imerss.org:PMLS:7830			Count: very many		Andy Lamb								PRESENT				Dodecaceria fewkesi					iNaturalist:192656								Dodecaceria fewkesi							Animalia	Annelida	Polychaeta	Terebellida	Cirratulidae	Dodecaceria	fewkesi		species		Berkeley & Berkeley, 1954
	imerss.org:PMLS:7831			Count: very abundant		Andy Lamb								PRESENT				Eudistylia vancouveri					iNaturalist:84864								Eudistylia vancouveri							Animalia	Annelida	Polychaeta	Sabellida	Sabellidae	Eudistylia	vancouveri		species		(Kinberg, 1866)
	imerss.org:PMLS:7918			Count: few		Andy Lamb								PRESENT				Protula pacifica					iNaturalist:538108								Protula pacifica							Animalia	Annelida	Polychaeta	Sabellida	Serpulidae	Protula	pacifica		species		Pixell, 1912
	imerss.org:PMLS:7919			Count: very many		Andy Lamb								PRESENT				Serpula columbiana					iNaturalist:131207								Serpula columbiana							Animalia	Annelida	Polychaeta	Sabellida	Serpulidae	Serpula	columbiana		species		Johnson, 1901
	imerss.org:PMLS:7920			Count: very many		Andy Lamb								PRESENT				Crucigera spp.					iNaturalist:543578								Crucigera							Animalia	Annelida	Polychaeta	Sabellida	Serpulidae	Crucigera			genus
	imerss.org:PMLS:7921			Count: abundant		Andy Lamb								PRESENT				Dodecaceria fewkesi					iNaturalist:192656								Dodecaceria fewkesi							Animalia	Annelida	Polychaeta	Terebellida	Cirratulidae	Dodecaceria	fewkesi		species		Berkeley & Berkeley, 1954
	imerss.org:PMLS:8022			Count: many		Andy Lamb								PRESENT				Serpula columbiana					iNaturalist:131207								Serpula columbiana							Animalia	Annelida	Polychaeta	Sabellida	Serpulidae	Serpula	columbiana		species		Johnson, 1901
	imerss.org:PMLS:8023			Count: some		Andy Lamb								PRESENT				Pseudochitinopoma occidentalis					iNaturalist:538107								Pseudochitinopoma occidentalis							Animalia	Annelida	Polychaeta	Sabellida	Serpulidae	Pseudochitinopoma	occidentalis		species		(Bush, 1905)
	imerss.org:PMLS:8024			Count: very many		Andy Lamb								PRESENT				Dodecaceria fewkesi					iNaturalist:192656								Dodecaceria fewkesi							Animalia	Annelida	Polychaeta	Terebellida	Cirratulidae	Dodecaceria	fewkesi		species		Berkeley & Berkeley, 1954
	imerss.org:PMLS:8025			Count: few		Andy Lamb								PRESENT				Chone aurantiaca					iNaturalist:356415								Chone aurantiaca							Animalia	Annelida	Polychaeta	Sabellida	Sabellidae	Chone	aurantiaca		species		(Johnson, 1901)
	imerss.org:PMLS:8026			Count: some		Andy Lamb								PRESENT				Myxicola sp.B					iNaturalist:49533								Myxicola infundibulum							Animalia	Annelida	Polychaeta	Sabellida	Sabellidae	Myxicola	infundibulum		species
	imerss.org:PMLS:8027			Count: few		Andy Lamb								PRESENT				Pista elongata					iNaturalist:338339								Pista elongata							Animalia	Annelida	Polychaeta	Terebellida	Terebellidae	Pista	elongata		species		Moore, 1909
	imerss.org:PMLS:8028			Count: few		Andy Lamb								PRESENT				Thelepus spp.					iNaturalist:117588								Thelepus							Animalia	Annelida	Polychaeta	Terebellida	Terebellidae	Thelepus			genus
	imerss.org:PMLS:8122			Count: few		Andy Lamb								PRESENT				Protula pacifica					iNaturalist:538108								Protula pacifica							Animalia	Annelida	Polychaeta	Sabellida	Serpulidae	Protula	pacifica		species		Pixell, 1912
	imerss.org:PMLS:8123			Count: some		Andy Lamb								PRESENT				Serpula columbiana					iNaturalist:131207								Serpula columbiana							Animalia	Annelida	Polychaeta	Sabellida	Serpulidae	Serpula	columbiana		species		Johnson, 1901
	imerss.org:PMLS:8124			Count: few		Andy Lamb								PRESENT				Dodecaceria fewkesi					iNaturalist:192656								Dodecaceria fewkesi							Animalia	Annelida	Polychaeta	Terebellida	Cirratulidae	Dodecaceria	fewkesi		species		Berkeley & Berkeley, 1954
	imerss.org:PMLS:8125			Count: few		Andy Lamb								PRESENT				Chone aurantiaca					iNaturalist:356415								Chone aurantiaca							Animalia	Annelida	Polychaeta	Sabellida	Sabellidae	Chone	aurantiaca		species		(Johnson, 1901)
	imerss.org:PMLS:8126			Count: few		Andy Lamb								PRESENT				Myxicola sp.B					iNaturalist:49533								Myxicola infundibulum							Animalia	Annelida	Polychaeta	Sabellida	Sabellidae	Myxicola	infundibulum		species
	imerss.org:PMLS:8127					Andy Lamb		2						PRESENT				Bispira pacifica					iNaturalist:1199401								Bispira pacifica							Animalia	Annelida	Polychaeta	Sabellida	Sabellidae	Bispira	pacifica		species		(Berkeley & Berkeley, 1954)
	imerss.org:PMLS:8223			Count: some		Andy Lamb								PRESENT				Serpula columbiana					iNaturalist:131207								Serpula columbiana							Animalia	Annelida	Polychaeta	Sabellida	Serpulidae	Serpula	columbiana		species		Johnson, 1901
	imerss.org:PMLS:8224			Count: few		Andy Lamb								PRESENT				Chone aurantiaca					iNaturalist:356415								Chone aurantiaca							Animalia	Annelida	Polychaeta	Sabellida	Sabellidae	Chone	aurantiaca		species		(Johnson, 1901)
	imerss.org:PMLS:8225			Count: some		Andy Lamb								PRESENT				Myxicola sp.B					iNaturalist:49533								Myxicola infundibulum							Animalia	Annelida	Polychaeta	Sabellida	Sabellidae	Myxicola	infundibulum		species
	imerss.org:PMLS:8304			Count: few		Andy Lamb								PRESENT				Protula pacifica					iNaturalist:538108								Protula pacifica							Animalia	Annelida	Polychaeta	Sabellida	Serpulidae	Protula	pacifica		species		Pixell, 1912
	imerss.org:PMLS:8305			Count: some		Andy Lamb								PRESENT				Serpula columbiana					iNaturalist:131207								Serpula columbiana							Animalia	Annelida	Polychaeta	Sabellida	Serpulidae	Serpula	columbiana		species		Johnson, 1901
	imerss.org:PMLS:8306			Count: abundant		Andy Lamb								PRESENT				Dodecaceria fewkesi					iNaturalist:192656								Dodecaceria fewkesi							Animalia	Annelida	Polychaeta	Terebellida	Cirratulidae	Dodecaceria	fewkesi		species		Berkeley & Berkeley, 1954
	imerss.org:PMLS:8307			Count: few		Andy Lamb								PRESENT				Chone aurantiaca					iNaturalist:356415								Chone aurantiaca							Animalia	Annelida	Polychaeta	Sabellida	Sabellidae	Chone	aurantiaca		species		(Johnson, 1901)
	imerss.org:PMLS:8308			Count: some		Andy Lamb								PRESENT				Myxicola sp.B					iNaturalist:49533								Myxicola infundibulum							Animalia	Annelida	Polychaeta	Sabellida	Sabellidae	Myxicola	infundibulum		species
	imerss.org:PMLS:8309			Count: few		Andy Lamb								PRESENT				Pista elongata					iNaturalist:338339								Pista elongata							Animalia	Annelida	Polychaeta	Terebellida	Terebellidae	Pista	elongata		species		Moore, 1909
	imerss.org:PMLS:8310			Count: few		Andy Lamb								PRESENT				Thelepus spp.					iNaturalist:117588								Thelepus							Animalia	Annelida	Polychaeta	Terebellida	Terebellidae	Thelepus			genus
	imerss.org:PMLS:8311			Count: some		Andy Lamb								PRESENT				Spiochaetopterus costarum pottsi					iNaturalist:130236								Spiochaetopterus costarum							Animalia	Annelida	Polychaeta		Chaetopteridae	Spiochaetopterus	costarum		species		(Claparède, 1869)
	imerss.org:PMLS:8389			Count: some		Andy Lamb								PRESENT				Serpula columbiana					iNaturalist:131207								Serpula columbiana							Animalia	Annelida	Polychaeta	Sabellida	Serpulidae	Serpula	columbiana		species		Johnson, 1901
	imerss.org:PMLS:8390			Count: some		Andy Lamb								PRESENT				Pileolaria spp.					iNaturalist:533325								Pileolaria							Animalia	Annelida	Polychaeta	Sabellida	Serpulidae	Pileolaria			genus
	imerss.org:PMLS:8391			Count: some		Andy Lamb								PRESENT				Dodecaceria fewkesi					iNaturalist:192656								Dodecaceria fewkesi							Animalia	Annelida	Polychaeta	Terebellida	Cirratulidae	Dodecaceria	fewkesi		species		Berkeley & Berkeley, 1954
	imerss.org:PMLS:8392			Count: some		Andy Lamb								PRESENT				Myxicola sp.B					iNaturalist:49533								Myxicola infundibulum							Animalia	Annelida	Polychaeta	Sabellida	Sabellidae	Myxicola	infundibulum		species
	imerss.org:PMLS:8485			Count: very many		Andy Lamb								PRESENT				Serpula columbiana					iNaturalist:131207								Serpula columbiana							Animalia	Annelida	Polychaeta	Sabellida	Serpulidae	Serpula	columbiana		species		Johnson, 1901
	imerss.org:PMLS:8486			Count: some		Andy Lamb								PRESENT				Pseudochitinopoma occidentalis					iNaturalist:538107								Pseudochitinopoma occidentalis							Animalia	Annelida	Polychaeta	Sabellida	Serpulidae	Pseudochitinopoma	occidentalis		species		(Bush, 1905)
	imerss.org:PMLS:8487			Count: many		Andy Lamb								PRESENT				Pileolaria spp.					iNaturalist:533325								Pileolaria							Animalia	Annelida	Polychaeta	Sabellida	Serpulidae	Pileolaria			genus
	imerss.org:PMLS:8488			Count: abundant		Andy Lamb								PRESENT				Dodecaceria fewkesi					iNaturalist:192656								Dodecaceria fewkesi							Animalia	Annelida	Polychaeta	Terebellida	Cirratulidae	Dodecaceria	fewkesi		species		Berkeley & Berkeley, 1954
	imerss.org:PMLS:8489			Count: few		Andy Lamb								PRESENT				Myxicola sp.B					iNaturalist:49533								Myxicola infundibulum							Animalia	Annelida	Polychaeta	Sabellida	Sabellidae	Myxicola	infundibulum		species
	imerss.org:PMLS:8490			Count: few		Andy Lamb								PRESENT				Pista elongata					iNaturalist:338339								Pista elongata							Animalia	Annelida	Polychaeta	Terebellida	Terebellidae	Pista	elongata		species		Moore, 1909
	imerss.org:PMLS:8491			Count: few		Andy Lamb								PRESENT				Thelepus spp.					iNaturalist:117588								Thelepus							Animalia	Annelida	Polychaeta	Terebellida	Terebellidae	Thelepus			genus
	imerss.org:PMLS:8581			Count: some		Andy Lamb								PRESENT				Serpula columbiana					iNaturalist:131207								Serpula columbiana							Animalia	Annelida	Polychaeta	Sabellida	Serpulidae	Serpula	columbiana		species		Johnson, 1901
	imerss.org:PMLS:8582			Count: some		Andy Lamb								PRESENT				Pileolaria spp.					iNaturalist:533325								Pileolaria							Animalia	Annelida	Polychaeta	Sabellida	Serpulidae	Pileolaria			genus
	imerss.org:PMLS:8583			Count: very many		Andy Lamb								PRESENT				Dodecaceria fewkesi					iNaturalist:192656								Dodecaceria fewkesi							Animalia	Annelida	Polychaeta	Terebellida	Cirratulidae	Dodecaceria	fewkesi		species		Berkeley & Berkeley, 1954
	imerss.org:PMLS:8584			Count: few		Andy Lamb								PRESENT				Parasabella media					iNaturalist:367054								Parasabella media							Animalia	Annelida	Polychaeta	Sabellida	Sabellidae	Parasabella	media		species		Bush, 1905
	imerss.org:PMLS:8585			Count: few		Andy Lamb								PRESENT				Myxicola sp.B					iNaturalist:49533								Myxicola infundibulum							Animalia	Annelida	Polychaeta	Sabellida	Sabellidae	Myxicola	infundibulum		species
	imerss.org:PMLS:8586			Count: few		Andy Lamb								PRESENT				Pista elongata					iNaturalist:338339								Pista elongata							Animalia	Annelida	Polychaeta	Terebellida	Terebellidae	Pista	elongata		species		Moore, 1909
	imerss.org:PMLS:8670			Count: some		Andy Lamb								PRESENT				Protula pacifica					iNaturalist:538108								Protula pacifica							Animalia	Annelida	Polychaeta	Sabellida	Serpulidae	Protula	pacifica		species		Pixell, 1912
	imerss.org:PMLS:8671			Count: some		Andy Lamb								PRESENT				Serpula columbiana					iNaturalist:131207								Serpula columbiana							Animalia	Annelida	Polychaeta	Sabellida	Serpulidae	Serpula	columbiana		species		Johnson, 1901
	imerss.org:PMLS:8672			Count: abundant		Andy Lamb								PRESENT				Pileolaria spp.					iNaturalist:533325								Pileolaria							Animalia	Annelida	Polychaeta	Sabellida	Serpulidae	Pileolaria			genus
	imerss.org:PMLS:8673			Count: abundant		Andy Lamb								PRESENT				Dodecaceria fewkesi					iNaturalist:192656								Dodecaceria fewkesi							Animalia	Annelida	Polychaeta	Terebellida	Cirratulidae	Dodecaceria	fewkesi		species		Berkeley & Berkeley, 1954
	imerss.org:PMLS:8674			Count: some		Andy Lamb								PRESENT				Spiochaetopterus costarum pottsi					iNaturalist:130236								Spiochaetopterus costarum							Animalia	Annelida	Polychaeta		Chaetopteridae	Spiochaetopterus	costarum		species		(Claparède, 1869)
	imerss.org:PMLS:8767			Count: some		Andy Lamb								PRESENT				Protula pacifica					iNaturalist:538108								Protula pacifica							Animalia	Annelida	Polychaeta	Sabellida	Serpulidae	Protula	pacifica		species		Pixell, 1912
	imerss.org:PMLS:8768			Count: some		Andy Lamb								PRESENT				Serpula columbiana					iNaturalist:131207								Serpula columbiana							Animalia	Annelida	Polychaeta	Sabellida	Serpulidae	Serpula	columbiana		species		Johnson, 1901
	imerss.org:PMLS:8769			Count: some		Andy Lamb								PRESENT				Dodecaceria fewkesi					iNaturalist:192656								Dodecaceria fewkesi							Animalia	Annelida	Polychaeta	Terebellida	Cirratulidae	Dodecaceria	fewkesi		species		Berkeley & Berkeley, 1954
	imerss.org:PMLS:8848			Count: many		Andy Lamb								PRESENT				Serpula columbiana					iNaturalist:131207								Serpula columbiana							Animalia	Annelida	Polychaeta	Sabellida	Serpulidae	Serpula	columbiana		species		Johnson, 1901
	imerss.org:PMLS:8849			Count: some		Andy Lamb								PRESENT				Dodecaceria fewkesi					iNaturalist:192656								Dodecaceria fewkesi							Animalia	Annelida	Polychaeta	Terebellida	Cirratulidae	Dodecaceria	fewkesi		species		Berkeley & Berkeley, 1954
	imerss.org:PMLS:8850					Andy Lamb		2						PRESENT				Pista elongata					iNaturalist:338339								Pista elongata							Animalia	Annelida	Polychaeta	Terebellida	Terebellidae	Pista	elongata		species		Moore, 1909
	imerss.org:PMLS:8929			Count: few		Andy Lamb								PRESENT				Serpula columbiana					iNaturalist:131207								Serpula columbiana							Animalia	Annelida	Polychaeta	Sabellida	Serpulidae	Serpula	columbiana		species		Johnson, 1901
	imerss.org:PMLS:8930			Count: many		Andy Lamb								PRESENT				Dodecaceria fewkesi					iNaturalist:192656								Dodecaceria fewkesi							Animalia	Annelida	Polychaeta	Terebellida	Cirratulidae	Dodecaceria	fewkesi		species		Berkeley & Berkeley, 1954
	imerss.org:PMLS:8931					Andy Lamb		1						PRESENT				Eudistylia vancouveri					iNaturalist:84864								Eudistylia vancouveri							Animalia	Annelida	Polychaeta	Sabellida	Sabellidae	Eudistylia	vancouveri		species		(Kinberg, 1866)
	imerss.org:PMLS:9003			Count: few		Andy Lamb								PRESENT				Protula pacifica					iNaturalist:538108								Protula pacifica							Animalia	Annelida	Polychaeta	Sabellida	Serpulidae	Protula	pacifica		species		Pixell, 1912
	imerss.org:PMLS:9004			Count: very many		Andy Lamb								PRESENT				Serpula columbiana					iNaturalist:131207								Serpula columbiana							Animalia	Annelida	Polychaeta	Sabellida	Serpulidae	Serpula	columbiana		species		Johnson, 1901
	imerss.org:PMLS:9005			Count: abundant		Andy Lamb								PRESENT				Dodecaceria fewkesi					iNaturalist:192656								Dodecaceria fewkesi							Animalia	Annelida	Polychaeta	Terebellida	Cirratulidae	Dodecaceria	fewkesi		species		Berkeley & Berkeley, 1954
	imerss.org:PMLS:9089			Count: some		Andy Lamb								PRESENT				Protula pacifica					iNaturalist:538108								Protula pacifica							Animalia	Annelida	Polychaeta	Sabellida	Serpulidae	Protula	pacifica		species		Pixell, 1912
	imerss.org:PMLS:9090			Count: some		Andy Lamb								PRESENT				Serpula columbiana					iNaturalist:131207								Serpula columbiana							Animalia	Annelida	Polychaeta	Sabellida	Serpulidae	Serpula	columbiana		species		Johnson, 1901
	imerss.org:PMLS:9091			Count: many		Andy Lamb								PRESENT				Dodecaceria fewkesi					iNaturalist:192656								Dodecaceria fewkesi							Animalia	Annelida	Polychaeta	Terebellida	Cirratulidae	Dodecaceria	fewkesi		species		Berkeley & Berkeley, 1954
	imerss.org:PMLS:9092			Count: few		Andy Lamb								PRESENT				Myxicola sp.B					iNaturalist:49533								Myxicola infundibulum							Animalia	Annelida	Polychaeta	Sabellida	Sabellidae	Myxicola	infundibulum		species
	imerss.org:PMLS:9093			Count: some		Andy Lamb								PRESENT				Pista elongata					iNaturalist:338339								Pista elongata							Animalia	Annelida	Polychaeta	Terebellida	Terebellidae	Pista	elongata		species		Moore, 1909
	imerss.org:PMLS:9178			Count: very many		Andy Lamb								PRESENT				Serpula columbiana					iNaturalist:131207								Serpula columbiana							Animalia	Annelida	Polychaeta	Sabellida	Serpulidae	Serpula	columbiana		species		Johnson, 1901
	imerss.org:PMLS:9179			Count: many		Andy Lamb								PRESENT				Crucigera spp.					iNaturalist:543578								Crucigera							Animalia	Annelida	Polychaeta	Sabellida	Serpulidae	Crucigera			genus
	imerss.org:PMLS:9180			Count: very many		Andy Lamb								PRESENT				Dodecaceria fewkesi					iNaturalist:192656								Dodecaceria fewkesi							Animalia	Annelida	Polychaeta	Terebellida	Cirratulidae	Dodecaceria	fewkesi		species		Berkeley & Berkeley, 1954
	imerss.org:PMLS:9181			Count: few		Andy Lamb								PRESENT				Pista elongata					iNaturalist:338339								Pista elongata							Animalia	Annelida	Polychaeta	Terebellida	Terebellidae	Pista	elongata		species		Moore, 1909
	imerss.org:PMLS:9257			Count: very many		Andy Lamb								PRESENT				Serpula columbiana					iNaturalist:131207								Serpula columbiana							Animalia	Annelida	Polychaeta	Sabellida	Serpulidae	Serpula	columbiana		species		Johnson, 1901
	imerss.org:PMLS:9258			Count: very abundant		Andy Lamb								PRESENT				Dodecaceria fewkesi					iNaturalist:192656								Dodecaceria fewkesi							Animalia	Annelida	Polychaeta	Terebellida	Cirratulidae	Dodecaceria	fewkesi		species		Berkeley & Berkeley, 1954
	imerss.org:PMLS:9259			Count: few		Andy Lamb								PRESENT				Eudistylia vancouveri					iNaturalist:84864								Eudistylia vancouveri							Animalia	Annelida	Polychaeta	Sabellida	Sabellidae	Eudistylia	vancouveri		species		(Kinberg, 1866)
	imerss.org:PMLS:9260			Count: few		Andy Lamb								PRESENT				Myxicola sp.B					iNaturalist:49533								Myxicola infundibulum							Animalia	Annelida	Polychaeta	Sabellida	Sabellidae	Myxicola	infundibulum		species
	imerss.org:PMLS:9330			Count: many		Andy Lamb								PRESENT				Serpula columbiana					iNaturalist:131207								Serpula columbiana							Animalia	Annelida	Polychaeta	Sabellida	Serpulidae	Serpula	columbiana		species		Johnson, 1901
	imerss.org:PMLS:9331			Count: many		Andy Lamb								PRESENT				Dodecaceria fewkesi					iNaturalist:192656								Dodecaceria fewkesi							Animalia	Annelida	Polychaeta	Terebellida	Cirratulidae	Dodecaceria	fewkesi		species		Berkeley & Berkeley, 1954
	imerss.org:PMLS:9421			Count: few		Andy Lamb								PRESENT				Protula pacifica					iNaturalist:538108								Protula pacifica							Animalia	Annelida	Polychaeta	Sabellida	Serpulidae	Protula	pacifica		species		Pixell, 1912
	imerss.org:PMLS:9422			Count: many		Andy Lamb								PRESENT				Serpula columbiana					iNaturalist:131207								Serpula columbiana							Animalia	Annelida	Polychaeta	Sabellida	Serpulidae	Serpula	columbiana		species		Johnson, 1901
	imerss.org:PMLS:9423			Count: very abundant		Andy Lamb								PRESENT				Dodecaceria fewkesi					iNaturalist:192656								Dodecaceria fewkesi							Animalia	Annelida	Polychaeta	Terebellida	Cirratulidae	Dodecaceria	fewkesi		species		Berkeley & Berkeley, 1954
	imerss.org:PMLS:9424			Count: few		Andy Lamb								PRESENT				Eudistylia vancouveri					iNaturalist:84864								Eudistylia vancouveri							Animalia	Annelida	Polychaeta	Sabellida	Sabellidae	Eudistylia	vancouveri		species		(Kinberg, 1866)
	imerss.org:PMLS:9425					Andy Lamb		1						PRESENT				Myxicola sp.B					iNaturalist:49533								Myxicola infundibulum							Animalia	Annelida	Polychaeta	Sabellida	Sabellidae	Myxicola	infundibulum		species
	imerss.org:PMLS:9426			Count: few		Andy Lamb								PRESENT				Pista elongata					iNaturalist:338339								Pista elongata							Animalia	Annelida	Polychaeta	Terebellida	Terebellidae	Pista	elongata		species		Moore, 1909
	imerss.org:PMLS:9532			Count: many		Andy Lamb								PRESENT				Protula pacifica					iNaturalist:538108								Protula pacifica							Animalia	Annelida	Polychaeta	Sabellida	Serpulidae	Protula	pacifica		species		Pixell, 1912
	imerss.org:PMLS:9533			Count: very many		Andy Lamb								PRESENT				Serpula columbiana					iNaturalist:131207								Serpula columbiana							Animalia	Annelida	Polychaeta	Sabellida	Serpulidae	Serpula	columbiana		species		Johnson, 1901
	imerss.org:PMLS:9534			Count: few		Andy Lamb								PRESENT				Dodecaceria fewkesi					iNaturalist:192656								Dodecaceria fewkesi							Animalia	Annelida	Polychaeta	Terebellida	Cirratulidae	Dodecaceria	fewkesi		species		Berkeley & Berkeley, 1954
	imerss.org:PMLS:9535			Count: few		Andy Lamb								PRESENT				Myxicola sp.B					iNaturalist:49533								Myxicola infundibulum							Animalia	Annelida	Polychaeta	Sabellida	Sabellidae	Myxicola	infundibulum		species
	imerss.org:PMLS:9536			Count: abundant		Andy Lamb								PRESENT				Phyllochaetopterus prolifica					iNaturalist:467241								Phyllochaetopterus prolifica							Animalia	Annelida	Polychaeta		Chaetopteridae	Phyllochaetopterus	prolifica		species		Potts, 1914
	imerss.org:PMLS:9645					Andy Lamb		2						PRESENT				Diopatra ornata					iNaturalist:339286								Diopatra ornata							Animalia	Annelida	Polychaeta	Eunicida	Onuphidae	Diopatra	ornata		species		Moore, 1911
	imerss.org:PMLS:9646			Count: many		Andy Lamb								PRESENT				Protula pacifica					iNaturalist:538108								Protula pacifica							Animalia	Annelida	Polychaeta	Sabellida	Serpulidae	Protula	pacifica		species		Pixell, 1912
	imerss.org:PMLS:9647			Count: some		Andy Lamb								PRESENT				Serpula columbiana					iNaturalist:131207								Serpula columbiana							Animalia	Annelida	Polychaeta	Sabellida	Serpulidae	Serpula	columbiana		species		Johnson, 1901
	imerss.org:PMLS:9648			Count: very many		Andy Lamb								PRESENT				Pseudochitinopoma occidentalis					iNaturalist:538107								Pseudochitinopoma occidentalis							Animalia	Annelida	Polychaeta	Sabellida	Serpulidae	Pseudochitinopoma	occidentalis		species		(Bush, 1905)
	imerss.org:PMLS:9649			Count: some		Andy Lamb								PRESENT				Pileolaria spp.					iNaturalist:533325								Pileolaria							Animalia	Annelida	Polychaeta	Sabellida	Serpulidae	Pileolaria			genus
	imerss.org:PMLS:9650			Count: very many		Andy Lamb								PRESENT				Dodecaceria fewkesi					iNaturalist:192656								Dodecaceria fewkesi							Animalia	Annelida	Polychaeta	Terebellida	Cirratulidae	Dodecaceria	fewkesi		species		Berkeley & Berkeley, 1954
	imerss.org:PMLS:9651			Count: few		Andy Lamb								PRESENT				Myxicola sp.B					iNaturalist:49533								Myxicola infundibulum							Animalia	Annelida	Polychaeta	Sabellida	Sabellidae	Myxicola	infundibulum		species
	imerss.org:PMLS:9764			Count: very many		Andy Lamb								PRESENT				Serpula columbiana					iNaturalist:131207								Serpula columbiana							Animalia	Annelida	Polychaeta	Sabellida	Serpulidae	Serpula	columbiana		species		Johnson, 1901
	imerss.org:PMLS:9765			Count: very many		Andy Lamb								PRESENT				Pseudochitinopoma occidentalis					iNaturalist:538107								Pseudochitinopoma occidentalis							Animalia	Annelida	Polychaeta	Sabellida	Serpulidae	Pseudochitinopoma	occidentalis		species		(Bush, 1905)
	imerss.org:PMLS:9766			Count: abundant		Andy Lamb								PRESENT				Dodecaceria fewkesi					iNaturalist:192656								Dodecaceria fewkesi							Animalia	Annelida	Polychaeta	Terebellida	Cirratulidae	Dodecaceria	fewkesi		species		Berkeley & Berkeley, 1954
	imerss.org:PMLS:9767			Count: few		Andy Lamb								PRESENT				Eudistylia vancouveri					iNaturalist:84864								Eudistylia vancouveri							Animalia	Annelida	Polychaeta	Sabellida	Sabellidae	Eudistylia	vancouveri		species		(Kinberg, 1866)
	imerss.org:PMLS:9768			Count: few		Andy Lamb								PRESENT				Myxicola sp.B					iNaturalist:49533								Myxicola infundibulum							Animalia	Annelida	Polychaeta	Sabellida	Sabellidae	Myxicola	infundibulum		species
	imerss.org:PMLS:9884			Count: few		Andy Lamb								PRESENT				Protula pacifica					iNaturalist:538108								Protula pacifica							Animalia	Annelida	Polychaeta	Sabellida	Serpulidae	Protula	pacifica		species		Pixell, 1912
	imerss.org:PMLS:9885			Count: very many		Andy Lamb								PRESENT				Serpula columbiana					iNaturalist:131207								Serpula columbiana							Animalia	Annelida	Polychaeta	Sabellida	Serpulidae	Serpula	columbiana		species		Johnson, 1901
	imerss.org:PMLS:9886			Count: many		Andy Lamb								PRESENT				Pseudochitinopoma occidentalis					iNaturalist:538107								Pseudochitinopoma occidentalis							Animalia	Annelida	Polychaeta	Sabellida	Serpulidae	Pseudochitinopoma	occidentalis		species		(Bush, 1905)
	imerss.org:PMLS:9887			Count: few		Andy Lamb								PRESENT				Chone aurantiaca					iNaturalist:356415								Chone aurantiaca							Animalia	Annelida	Polychaeta	Sabellida	Sabellidae	Chone	aurantiaca		species		(Johnson, 1901)
	imerss.org:PMLS:9888			Count: some		Andy Lamb								PRESENT				Myxicola sp.B					iNaturalist:49533								Myxicola infundibulum							Animalia	Annelida	Polychaeta	Sabellida	Sabellidae	Myxicola	infundibulum		species
	imerss.org:PMLS:9889			Count: few		Andy Lamb								PRESENT				Pista elongata					iNaturalist:338339								Pista elongata							Animalia	Annelida	Polychaeta	Terebellida	Terebellidae	Pista	elongata		species		Moore, 1909
	imerss.org:PMLS:9984			Count: few		Andy Lamb								PRESENT				Protula pacifica					iNaturalist:538108								Protula pacifica							Animalia	Annelida	Polychaeta	Sabellida	Serpulidae	Protula	pacifica		species		Pixell, 1912
	imerss.org:PMLS:9985			Count: very many		Andy Lamb								PRESENT				Serpula columbiana					iNaturalist:131207								Serpula columbiana							Animalia	Annelida	Polychaeta	Sabellida	Serpulidae	Serpula	columbiana		species		Johnson, 1901
	imerss.org:PMLS:9986			Count: abundant		Andy Lamb								PRESENT				Dodecaceria fewkesi					iNaturalist:192656								Dodecaceria fewkesi							Animalia	Annelida	Polychaeta	Terebellida	Cirratulidae	Dodecaceria	fewkesi		species		Berkeley & Berkeley, 1954
	imerss.org:PMLS:9987			Count: few		Andy Lamb								PRESENT				Eudistylia vancouveri					iNaturalist:84864								Eudistylia vancouveri							Animalia	Annelida	Polychaeta	Sabellida	Sabellidae	Eudistylia	vancouveri		species		(Kinberg, 1866)
	imerss.org:PMLS:9988			Count: few		Andy Lamb								PRESENT				Myxicola sp.B					iNaturalist:49533								Myxicola infundibulum							Animalia	Annelida	Polychaeta	Sabellida	Sabellidae	Myxicola	infundibulum		species
	imerss.org:PMLS:9989			Count: few		Andy Lamb								PRESENT				Pista elongata					iNaturalist:338339								Pista elongata							Animalia	Annelida	Polychaeta	Terebellida	Terebellidae	Pista	elongata		species		Moore, 1909
	imerss.org:PMLS:9990			Count: few		Andy Lamb								PRESENT				Thelepus spp.					iNaturalist:117588								Thelepus							Animalia	Annelida	Polychaeta	Terebellida	Terebellidae	Thelepus			genus
	imerss.org:PMLS:10095			Count: many		Andy Lamb								PRESENT				Serpula columbiana					iNaturalist:131207								Serpula columbiana							Animalia	Annelida	Polychaeta	Sabellida	Serpulidae	Serpula	columbiana		species		Johnson, 1901
	imerss.org:PMLS:10096			Count: many		Andy Lamb								PRESENT				Dodecaceria fewkesi					iNaturalist:192656								Dodecaceria fewkesi							Animalia	Annelida	Polychaeta	Terebellida	Cirratulidae	Dodecaceria	fewkesi		species		Berkeley & Berkeley, 1954
	imerss.org:PMLS:10097			Count: some		Andy Lamb								PRESENT				Myxicola sp.B					iNaturalist:49533								Myxicola infundibulum							Animalia	Annelida	Polychaeta	Sabellida	Sabellidae	Myxicola	infundibulum		species
	imerss.org:PMLS:10098			Count: few		Andy Lamb								PRESENT				Pista elongata					iNaturalist:338339								Pista elongata							Animalia	Annelida	Polychaeta	Terebellida	Terebellidae	Pista	elongata		species		Moore, 1909
	imerss.org:PMLS:10190			Count: very many		Andy Lamb								PRESENT				Serpula columbiana					iNaturalist:131207								Serpula columbiana							Animalia	Annelida	Polychaeta	Sabellida	Serpulidae	Serpula	columbiana		species		Johnson, 1901
	imerss.org:PMLS:10191			Count: few		Andy Lamb								PRESENT				Eudistylia vancouveri					iNaturalist:84864								Eudistylia vancouveri							Animalia	Annelida	Polychaeta	Sabellida	Sabellidae	Eudistylia	vancouveri		species		(Kinberg, 1866)
	imerss.org:PMLS:10192			Count: many		Andy Lamb								PRESENT				Pista elongata					iNaturalist:338339								Pista elongata							Animalia	Annelida	Polychaeta	Terebellida	Terebellidae	Pista	elongata		species		Moore, 1909
	imerss.org:PMLS:10263			Count: few		Andy Lamb								PRESENT				Thelepus spp.					iNaturalist:117588								Thelepus							Animalia	Annelida	Polychaeta	Terebellida	Terebellidae	Thelepus			genus
	imerss.org:PMLS:10329			Count: very many		Andy Lamb								PRESENT				Serpula columbiana					iNaturalist:131207								Serpula columbiana							Animalia	Annelida	Polychaeta	Sabellida	Serpulidae	Serpula	columbiana		species		Johnson, 1901
	imerss.org:PMLS:10330			Count: abundant		Andy Lamb								PRESENT				Dodecaceria fewkesi					iNaturalist:192656								Dodecaceria fewkesi							Animalia	Annelida	Polychaeta	Terebellida	Cirratulidae	Dodecaceria	fewkesi		species		Berkeley & Berkeley, 1954
	imerss.org:PMLS:10422					Andy Lamb		1						PRESENT				Protula pacifica					iNaturalist:538108								Protula pacifica							Animalia	Annelida	Polychaeta	Sabellida	Serpulidae	Protula	pacifica		species		Pixell, 1912
	imerss.org:PMLS:10423			Count: few		Andy Lamb								PRESENT				Serpula columbiana					iNaturalist:131207								Serpula columbiana							Animalia	Annelida	Polychaeta	Sabellida	Serpulidae	Serpula	columbiana		species		Johnson, 1901
	imerss.org:PMLS:10424			Count: few		Andy Lamb								PRESENT				Thelepus spp.					iNaturalist:117588								Thelepus							Animalia	Annelida	Polychaeta	Terebellida	Terebellidae	Thelepus			genus
	imerss.org:PMLS:10506			Count: few		Andy Lamb								PRESENT				Myxicola sp.B					iNaturalist:49533								Myxicola infundibulum							Animalia	Annelida	Polychaeta	Sabellida	Sabellidae	Myxicola	infundibulum		species
	imerss.org:PMLS:10572			Count: few		Andy Lamb								PRESENT				Serpula columbiana					iNaturalist:131207								Serpula columbiana							Animalia	Annelida	Polychaeta	Sabellida	Serpulidae	Serpula	columbiana		species		Johnson, 1901
	imerss.org:PMLS:10573			Count: few		Andy Lamb								PRESENT				Dodecaceria fewkesi					iNaturalist:192656								Dodecaceria fewkesi							Animalia	Annelida	Polychaeta	Terebellida	Cirratulidae	Dodecaceria	fewkesi		species		Berkeley & Berkeley, 1954
	imerss.org:PMLS:10574			Count: few		Andy Lamb								PRESENT				Chone aurantiaca					iNaturalist:356415								Chone aurantiaca							Animalia	Annelida	Polychaeta	Sabellida	Sabellidae	Chone	aurantiaca		species		(Johnson, 1901)
	imerss.org:PMLS:10575			Count: few		Andy Lamb								PRESENT				Parasabella media					iNaturalist:367054								Parasabella media							Animalia	Annelida	Polychaeta	Sabellida	Sabellidae	Parasabella	media		species		Bush, 1905
	imerss.org:PMLS:10576			Count: few		Andy Lamb								PRESENT				Myxicola sp.B					iNaturalist:49533								Myxicola infundibulum							Animalia	Annelida	Polychaeta	Sabellida	Sabellidae	Myxicola	infundibulum		species
	imerss.org:PMLS:10577			Count: few		Andy Lamb								PRESENT				Thelepus spp.					iNaturalist:117588								Thelepus							Animalia	Annelida	Polychaeta	Terebellida	Terebellidae	Thelepus			genus
	imerss.org:PMLS:10680			Count: very many		Andy Lamb								PRESENT				Serpula columbiana					iNaturalist:131207								Serpula columbiana							Animalia	Annelida	Polychaeta	Sabellida	Serpulidae	Serpula	columbiana		species		Johnson, 1901
	imerss.org:PMLS:10681			Count: abundant		Andy Lamb								PRESENT				Dodecaceria fewkesi					iNaturalist:192656								Dodecaceria fewkesi							Animalia	Annelida	Polychaeta	Terebellida	Cirratulidae	Dodecaceria	fewkesi		species		Berkeley & Berkeley, 1954
	imerss.org:PMLS:10682					Andy Lamb		1						PRESENT				Eudistylia vancouveri					iNaturalist:84864								Eudistylia vancouveri							Animalia	Annelida	Polychaeta	Sabellida	Sabellidae	Eudistylia	vancouveri		species		(Kinberg, 1866)
	imerss.org:PMLS:10683			Count: few		Andy Lamb								PRESENT				Myxicola sp.B					iNaturalist:49533								Myxicola infundibulum							Animalia	Annelida	Polychaeta	Sabellida	Sabellidae	Myxicola	infundibulum		species
	imerss.org:PMLS:10684			Count: few		Andy Lamb								PRESENT				Thelepus spp.					iNaturalist:117588								Thelepus							Animalia	Annelida	Polychaeta	Terebellida	Terebellidae	Thelepus			genus
	imerss.org:PMLS:10833					Andy Lamb		1						PRESENT				Arctonoe pulchra					iNaturalist:465156								Arctonoe pulchra							Animalia	Annelida	Polychaeta	Phyllodocida	Polynoidae	Arctonoe	pulchra		species		(Johnson, 1897)
	imerss.org:PMLS:10834			Count: some		Andy Lamb								PRESENT				Protula pacifica					iNaturalist:538108								Protula pacifica							Animalia	Annelida	Polychaeta	Sabellida	Serpulidae	Protula	pacifica		species		Pixell, 1912
	imerss.org:PMLS:10835			Count: very many		Andy Lamb								PRESENT				Serpula columbiana					iNaturalist:131207								Serpula columbiana							Animalia	Annelida	Polychaeta	Sabellida	Serpulidae	Serpula	columbiana		species		Johnson, 1901
	imerss.org:PMLS:10836			Count: abundant		Andy Lamb								PRESENT				Dodecaceria fewkesi					iNaturalist:192656								Dodecaceria fewkesi							Animalia	Annelida	Polychaeta	Terebellida	Cirratulidae	Dodecaceria	fewkesi		species		Berkeley & Berkeley, 1954
	imerss.org:PMLS:10837			Count: very many		Andy Lamb								PRESENT				Chone aurantiaca					iNaturalist:356415								Chone aurantiaca							Animalia	Annelida	Polychaeta	Sabellida	Sabellidae	Chone	aurantiaca		species		(Johnson, 1901)
	imerss.org:PMLS:10838			Count: few		Andy Lamb								PRESENT				Parasabella media					iNaturalist:367054								Parasabella media							Animalia	Annelida	Polychaeta	Sabellida	Sabellidae	Parasabella	media		species		Bush, 1905
	imerss.org:PMLS:10839			Count: few		Andy Lamb								PRESENT				Eudistylia vancouveri					iNaturalist:84864								Eudistylia vancouveri							Animalia	Annelida	Polychaeta	Sabellida	Sabellidae	Eudistylia	vancouveri		species		(Kinberg, 1866)
	imerss.org:PMLS:10840			Count: very many		Andy Lamb								PRESENT				Myxicola sp.B					iNaturalist:49533								Myxicola infundibulum							Animalia	Annelida	Polychaeta	Sabellida	Sabellidae	Myxicola	infundibulum		species
	imerss.org:PMLS:10841			Count: few		Andy Lamb								PRESENT				Thelepus spp.					iNaturalist:117588								Thelepus							Animalia	Annelida	Polychaeta	Terebellida	Terebellidae	Thelepus			genus
	imerss.org:PMLS:10998					Andy Lamb		1						PRESENT				Arctonoe vittata					iNaturalist:122163								Arctonoe vittata							Animalia	Annelida	Polychaeta	Phyllodocida	Polynoidae	Arctonoe	vittata		species		(Grube, 1855)
	imerss.org:PMLS:10999			Count: many		Andy Lamb								PRESENT				Serpula columbiana					iNaturalist:131207								Serpula columbiana							Animalia	Annelida	Polychaeta	Sabellida	Serpulidae	Serpula	columbiana		species		Johnson, 1901
	imerss.org:PMLS:11000			Count: very many		Andy Lamb								PRESENT				Dodecaceria fewkesi					iNaturalist:192656								Dodecaceria fewkesi							Animalia	Annelida	Polychaeta	Terebellida	Cirratulidae	Dodecaceria	fewkesi		species		Berkeley & Berkeley, 1954
	imerss.org:PMLS:11001			Count: few		Andy Lamb								PRESENT				Chone aurantiaca					iNaturalist:356415								Chone aurantiaca							Animalia	Annelida	Polychaeta	Sabellida	Sabellidae	Chone	aurantiaca		species		(Johnson, 1901)
	imerss.org:PMLS:11002			Count: few		Andy Lamb								PRESENT				Myxicola sp.B					iNaturalist:49533								Myxicola infundibulum							Animalia	Annelida	Polychaeta	Sabellida	Sabellidae	Myxicola	infundibulum		species
	imerss.org:PMLS:11003			Count: few		Andy Lamb								PRESENT				Pista elongata					iNaturalist:338339								Pista elongata							Animalia	Annelida	Polychaeta	Terebellida	Terebellidae	Pista	elongata		species		Moore, 1909
	imerss.org:PMLS:11116			Count: few		Andy Lamb								PRESENT				Protula pacifica					iNaturalist:538108								Protula pacifica							Animalia	Annelida	Polychaeta	Sabellida	Serpulidae	Protula	pacifica		species		Pixell, 1912
	imerss.org:PMLS:11117			Count: some		Andy Lamb								PRESENT				Serpula columbiana					iNaturalist:131207								Serpula columbiana							Animalia	Annelida	Polychaeta	Sabellida	Serpulidae	Serpula	columbiana		species		Johnson, 1901
	imerss.org:PMLS:11118			Count: few		Andy Lamb								PRESENT				Dodecaceria fewkesi					iNaturalist:192656								Dodecaceria fewkesi							Animalia	Annelida	Polychaeta	Terebellida	Cirratulidae	Dodecaceria	fewkesi		species		Berkeley & Berkeley, 1954
	imerss.org:PMLS:11119					Andy Lamb		1						PRESENT				Thelepus spp.					iNaturalist:117588								Thelepus							Animalia	Annelida	Polychaeta	Terebellida	Terebellidae	Thelepus			genus
	imerss.org:PMLS:11198			Count: some		Andy Lamb								PRESENT				Serpula columbiana					iNaturalist:131207								Serpula columbiana							Animalia	Annelida	Polychaeta	Sabellida	Serpulidae	Serpula	columbiana		species		Johnson, 1901
	imerss.org:PMLS:11199			Count: many		Andy Lamb								PRESENT				Dodecaceria fewkesi					iNaturalist:192656								Dodecaceria fewkesi							Animalia	Annelida	Polychaeta	Terebellida	Cirratulidae	Dodecaceria	fewkesi		species		Berkeley & Berkeley, 1954
	imerss.org:PMLS:11200			Count: few		Andy Lamb								PRESENT				Chone aurantiaca					iNaturalist:356415								Chone aurantiaca							Animalia	Annelida	Polychaeta	Sabellida	Sabellidae	Chone	aurantiaca		species		(Johnson, 1901)
	imerss.org:PMLS:11201			Count: some		Andy Lamb								PRESENT				Myxicola sp.B					iNaturalist:49533								Myxicola infundibulum							Animalia	Annelida	Polychaeta	Sabellida	Sabellidae	Myxicola	infundibulum		species
	imerss.org:PMLS:11202			Count: some		Andy Lamb								PRESENT				Thelepus spp.					iNaturalist:117588								Thelepus							Animalia	Annelida	Polychaeta	Terebellida	Terebellidae	Thelepus			genus
	imerss.org:PMLS:11293			Count: some		Andy Lamb								PRESENT				Protula pacifica					iNaturalist:538108								Protula pacifica							Animalia	Annelida	Polychaeta	Sabellida	Serpulidae	Protula	pacifica		species		Pixell, 1912
	imerss.org:PMLS:11294			Count: abundant		Andy Lamb								PRESENT				Serpula columbiana					iNaturalist:131207								Serpula columbiana							Animalia	Annelida	Polychaeta	Sabellida	Serpulidae	Serpula	columbiana		species		Johnson, 1901
	imerss.org:PMLS:11295			Count: abundant		Andy Lamb								PRESENT				Dodecaceria fewkesi					iNaturalist:192656								Dodecaceria fewkesi							Animalia	Annelida	Polychaeta	Terebellida	Cirratulidae	Dodecaceria	fewkesi		species		Berkeley & Berkeley, 1954
	imerss.org:PMLS:11296			Count: few		Andy Lamb								PRESENT				Parasabella media					iNaturalist:367054								Parasabella media							Animalia	Annelida	Polychaeta	Sabellida	Sabellidae	Parasabella	media		species		Bush, 1905
	imerss.org:PMLS:11297			Count: some		Andy Lamb								PRESENT				Myxicola sp.B					iNaturalist:49533								Myxicola infundibulum							Animalia	Annelida	Polychaeta	Sabellida	Sabellidae	Myxicola	infundibulum		species
	imerss.org:PMLS:11298			Count: some		Andy Lamb								PRESENT				Pista elongata					iNaturalist:338339								Pista elongata							Animalia	Annelida	Polychaeta	Terebellida	Terebellidae	Pista	elongata		species		Moore, 1909
	imerss.org:PMLS:11299			Count: some		Andy Lamb								PRESENT				Thelepus spp.					iNaturalist:117588								Thelepus							Animalia	Annelida	Polychaeta	Terebellida	Terebellidae	Thelepus			genus
	imerss.org:PMLS:11422			Count: few		Andy Lamb								PRESENT				Protula pacifica					iNaturalist:538108								Protula pacifica							Animalia	Annelida	Polychaeta	Sabellida	Serpulidae	Protula	pacifica		species		Pixell, 1912
	imerss.org:PMLS:11423			Count: very many		Andy Lamb								PRESENT				Serpula columbiana					iNaturalist:131207								Serpula columbiana							Animalia	Annelida	Polychaeta	Sabellida	Serpulidae	Serpula	columbiana		species		Johnson, 1901
	imerss.org:PMLS:11424			Count: abundant		Andy Lamb								PRESENT				Dodecaceria fewkesi					iNaturalist:192656								Dodecaceria fewkesi							Animalia	Annelida	Polychaeta	Terebellida	Cirratulidae	Dodecaceria	fewkesi		species		Berkeley & Berkeley, 1954
	imerss.org:PMLS:11425			Count: few		Andy Lamb								PRESENT				Chone aurantiaca					iNaturalist:356415								Chone aurantiaca							Animalia	Annelida	Polychaeta	Sabellida	Sabellidae	Chone	aurantiaca		species		(Johnson, 1901)
	imerss.org:PMLS:11426					Andy Lamb		1						PRESENT				Eudistylia vancouveri					iNaturalist:84864								Eudistylia vancouveri							Animalia	Annelida	Polychaeta	Sabellida	Sabellidae	Eudistylia	vancouveri		species		(Kinberg, 1866)
	imerss.org:PMLS:11427			Count: few		Andy Lamb								PRESENT				Thelepus spp.					iNaturalist:117588								Thelepus							Animalia	Annelida	Polychaeta	Terebellida	Terebellidae	Thelepus			genus
	imerss.org:PMLS:11518			Count: some		Andy Lamb								PRESENT				Protula pacifica					iNaturalist:538108								Protula pacifica							Animalia	Annelida	Polychaeta	Sabellida	Serpulidae	Protula	pacifica		species		Pixell, 1912
	imerss.org:PMLS:11519			Count: some		Andy Lamb								PRESENT				Serpula columbiana					iNaturalist:131207								Serpula columbiana							Animalia	Annelida	Polychaeta	Sabellida	Serpulidae	Serpula	columbiana		species		Johnson, 1901
	imerss.org:PMLS:11520			Count: many		Andy Lamb								PRESENT				Dodecaceria fewkesi					iNaturalist:192656								Dodecaceria fewkesi							Animalia	Annelida	Polychaeta	Terebellida	Cirratulidae	Dodecaceria	fewkesi		species		Berkeley & Berkeley, 1954
	imerss.org:PMLS:11521			Count: few		Andy Lamb								PRESENT				Chone aurantiaca					iNaturalist:356415								Chone aurantiaca							Animalia	Annelida	Polychaeta	Sabellida	Sabellidae	Chone	aurantiaca		species		(Johnson, 1901)
	imerss.org:PMLS:11618			Count: few		Andy Lamb								PRESENT				Protula pacifica					iNaturalist:538108								Protula pacifica							Animalia	Annelida	Polychaeta	Sabellida	Serpulidae	Protula	pacifica		species		Pixell, 1912
	imerss.org:PMLS:11619			Count: abundant		Andy Lamb								PRESENT				Serpula columbiana					iNaturalist:131207								Serpula columbiana							Animalia	Annelida	Polychaeta	Sabellida	Serpulidae	Serpula	columbiana		species		Johnson, 1901
	imerss.org:PMLS:11620			Count: abundant		Andy Lamb								PRESENT				Dodecaceria fewkesi					iNaturalist:192656								Dodecaceria fewkesi							Animalia	Annelida	Polychaeta	Terebellida	Cirratulidae	Dodecaceria	fewkesi		species		Berkeley & Berkeley, 1954
	imerss.org:PMLS:11621			Count: few		Andy Lamb								PRESENT				Chone aurantiaca					iNaturalist:356415								Chone aurantiaca							Animalia	Annelida	Polychaeta	Sabellida	Sabellidae	Chone	aurantiaca		species		(Johnson, 1901)
	imerss.org:PMLS:11622			Count: many		Andy Lamb								PRESENT				Myxicola sp.B					iNaturalist:49533								Myxicola infundibulum							Animalia	Annelida	Polychaeta	Sabellida	Sabellidae	Myxicola	infundibulum		species
	imerss.org:PMLS:11623			Count: some		Andy Lamb								PRESENT				Thelepus spp.					iNaturalist:117588								Thelepus							Animalia	Annelida	Polychaeta	Terebellida	Terebellidae	Thelepus			genus
	imerss.org:PMLS:11719			Count: few		Andy Lamb								PRESENT				Protula pacifica					iNaturalist:538108								Protula pacifica							Animalia	Annelida	Polychaeta	Sabellida	Serpulidae	Protula	pacifica		species		Pixell, 1912
	imerss.org:PMLS:11720			Count: very many		Andy Lamb								PRESENT				Serpula columbiana					iNaturalist:131207								Serpula columbiana							Animalia	Annelida	Polychaeta	Sabellida	Serpulidae	Serpula	columbiana		species		Johnson, 1901
	imerss.org:PMLS:11721			Count: many		Andy Lamb								PRESENT				Dodecaceria fewkesi					iNaturalist:192656								Dodecaceria fewkesi							Animalia	Annelida	Polychaeta	Terebellida	Cirratulidae	Dodecaceria	fewkesi		species		Berkeley & Berkeley, 1954
	imerss.org:PMLS:11722			Count: some		Andy Lamb								PRESENT				Myxicola sp.B					iNaturalist:49533								Myxicola infundibulum							Animalia	Annelida	Polychaeta	Sabellida	Sabellidae	Myxicola	infundibulum		species
	imerss.org:PMLS:11723			Count: few		Andy Lamb								PRESENT				Thelepus spp.					iNaturalist:117588								Thelepus							Animalia	Annelida	Polychaeta	Terebellida	Terebellidae	Thelepus			genus
	imerss.org:PMLS:11812			Count: few		Andy Lamb								PRESENT				Protula pacifica					iNaturalist:538108								Protula pacifica							Animalia	Annelida	Polychaeta	Sabellida	Serpulidae	Protula	pacifica		species		Pixell, 1912
	imerss.org:PMLS:11813			Count: some		Andy Lamb								PRESENT				Serpula columbiana					iNaturalist:131207								Serpula columbiana							Animalia	Annelida	Polychaeta	Sabellida	Serpulidae	Serpula	columbiana		species		Johnson, 1901
	imerss.org:PMLS:11910			Count: many		Andy Lamb								PRESENT				Serpula columbiana					iNaturalist:131207								Serpula columbiana							Animalia	Annelida	Polychaeta	Sabellida	Serpulidae	Serpula	columbiana		species		Johnson, 1901
	imerss.org:PMLS:11911			Count: very many		Andy Lamb								PRESENT				Pileolaria spp.					iNaturalist:533325								Pileolaria							Animalia	Annelida	Polychaeta	Sabellida	Serpulidae	Pileolaria			genus
	imerss.org:PMLS:11912			Count: very abundant		Andy Lamb								PRESENT				Dodecaceria fewkesi					iNaturalist:192656								Dodecaceria fewkesi							Animalia	Annelida	Polychaeta	Terebellida	Cirratulidae	Dodecaceria	fewkesi		species		Berkeley & Berkeley, 1954
	imerss.org:PMLS:11913			Count: few		Andy Lamb								PRESENT				Eudistylia vancouveri					iNaturalist:84864								Eudistylia vancouveri							Animalia	Annelida	Polychaeta	Sabellida	Sabellidae	Eudistylia	vancouveri		species		(Kinberg, 1866)
	imerss.org:PMLS:11914					Andy Lamb		1						PRESENT				Myxicola sp.B					iNaturalist:49533								Myxicola infundibulum							Animalia	Annelida	Polychaeta	Sabellida	Sabellidae	Myxicola	infundibulum		species
	imerss.org:PMLS:11915			Count: few		Andy Lamb								PRESENT				Pista elongata					iNaturalist:338339								Pista elongata							Animalia	Annelida	Polychaeta	Terebellida	Terebellidae	Pista	elongata		species		Moore, 1909
	imerss.org:PMLS:12015			Count: many		Andy Lamb								PRESENT				Serpula columbiana					iNaturalist:131207								Serpula columbiana							Animalia	Annelida	Polychaeta	Sabellida	Serpulidae	Serpula	columbiana		species		Johnson, 1901
	imerss.org:PMLS:12016			Count: many		Andy Lamb								PRESENT				Pileolaria spp.					iNaturalist:533325								Pileolaria							Animalia	Annelida	Polychaeta	Sabellida	Serpulidae	Pileolaria			genus
	imerss.org:PMLS:12017			Count: many		Andy Lamb								PRESENT				Dodecaceria fewkesi					iNaturalist:192656								Dodecaceria fewkesi							Animalia	Annelida	Polychaeta	Terebellida	Cirratulidae	Dodecaceria	fewkesi		species		Berkeley & Berkeley, 1954
	imerss.org:PMLS:12018			Count: some		Andy Lamb								PRESENT				Parasabella media					iNaturalist:367054								Parasabella media							Animalia	Annelida	Polychaeta	Sabellida	Sabellidae	Parasabella	media		species		Bush, 1905
	imerss.org:PMLS:12019			Count: few		Andy Lamb								PRESENT				Eudistylia vancouveri					iNaturalist:84864								Eudistylia vancouveri							Animalia	Annelida	Polychaeta	Sabellida	Sabellidae	Eudistylia	vancouveri		species		(Kinberg, 1866)
	imerss.org:PMLS:12020			Count: few		Andy Lamb								PRESENT				Myxicola sp.B					iNaturalist:49533								Myxicola infundibulum							Animalia	Annelida	Polychaeta	Sabellida	Sabellidae	Myxicola	infundibulum		species
	imerss.org:PMLS:12021			Count: few		Andy Lamb								PRESENT				Pista elongata					iNaturalist:338339								Pista elongata							Animalia	Annelida	Polychaeta	Terebellida	Terebellidae	Pista	elongata		species		Moore, 1909
	imerss.org:PMLS:12102			Count: few		Andy Lamb								PRESENT				Protula pacifica					iNaturalist:538108								Protula pacifica							Animalia	Annelida	Polychaeta	Sabellida	Serpulidae	Protula	pacifica		species		Pixell, 1912
	imerss.org:PMLS:12103			Count: many		Andy Lamb								PRESENT				Serpula columbiana					iNaturalist:131207								Serpula columbiana							Animalia	Annelida	Polychaeta	Sabellida	Serpulidae	Serpula	columbiana		species		Johnson, 1901
	imerss.org:PMLS:12104			Count: abundant		Andy Lamb								PRESENT				Dodecaceria fewkesi					iNaturalist:192656								Dodecaceria fewkesi							Animalia	Annelida	Polychaeta	Terebellida	Cirratulidae	Dodecaceria	fewkesi		species		Berkeley & Berkeley, 1954
	imerss.org:PMLS:12105			Count: some		Andy Lamb								PRESENT				Myxicola sp.B					iNaturalist:49533								Myxicola infundibulum							Animalia	Annelida	Polychaeta	Sabellida	Sabellidae	Myxicola	infundibulum		species
	imerss.org:PMLS:12106					Andy Lamb		2						PRESENT				Bispira pacifica					iNaturalist:1199401								Bispira pacifica							Animalia	Annelida	Polychaeta	Sabellida	Sabellidae	Bispira	pacifica		species		(Berkeley & Berkeley, 1954)
	imerss.org:PMLS:12202			Count: few		Andy Lamb								PRESENT				Diopatra ornata					iNaturalist:339286								Diopatra ornata							Animalia	Annelida	Polychaeta	Eunicida	Onuphidae	Diopatra	ornata		species		Moore, 1911
	imerss.org:PMLS:12203			Count: few		Andy Lamb								PRESENT				Protula pacifica					iNaturalist:538108								Protula pacifica							Animalia	Annelida	Polychaeta	Sabellida	Serpulidae	Protula	pacifica		species		Pixell, 1912
	imerss.org:PMLS:12204			Count: some		Andy Lamb								PRESENT				Serpula columbiana					iNaturalist:131207								Serpula columbiana							Animalia	Annelida	Polychaeta	Sabellida	Serpulidae	Serpula	columbiana		species		Johnson, 1901
	imerss.org:PMLS:12205			Count: some		Andy Lamb								PRESENT				Dodecaceria fewkesi					iNaturalist:192656								Dodecaceria fewkesi							Animalia	Annelida	Polychaeta	Terebellida	Cirratulidae	Dodecaceria	fewkesi		species		Berkeley & Berkeley, 1954
	imerss.org:PMLS:12206			Count: few		Andy Lamb								PRESENT				Chone aurantiaca					iNaturalist:356415								Chone aurantiaca							Animalia	Annelida	Polychaeta	Sabellida	Sabellidae	Chone	aurantiaca		species		(Johnson, 1901)
	imerss.org:PMLS:12207			Count: few		Andy Lamb								PRESENT				Myxicola sp.B					iNaturalist:49533								Myxicola infundibulum							Animalia	Annelida	Polychaeta	Sabellida	Sabellidae	Myxicola	infundibulum		species
	imerss.org:PMLS:12208			Count: few		Andy Lamb								PRESENT				Pista elongata					iNaturalist:338339								Pista elongata							Animalia	Annelida	Polychaeta	Terebellida	Terebellidae	Pista	elongata		species		Moore, 1909
	imerss.org:PMLS:12297			Count: very many		Andy Lamb								PRESENT				Serpula columbiana					iNaturalist:131207								Serpula columbiana							Animalia	Annelida	Polychaeta	Sabellida	Serpulidae	Serpula	columbiana		species		Johnson, 1901
	imerss.org:PMLS:12298			Count: many		Andy Lamb								PRESENT				Dodecaceria fewkesi					iNaturalist:192656								Dodecaceria fewkesi							Animalia	Annelida	Polychaeta	Terebellida	Cirratulidae	Dodecaceria	fewkesi		species		Berkeley & Berkeley, 1954
	imerss.org:PMLS:12299					Andy Lamb		1						PRESENT				Chone aurantiaca					iNaturalist:356415								Chone aurantiaca							Animalia	Annelida	Polychaeta	Sabellida	Sabellidae	Chone	aurantiaca		species		(Johnson, 1901)
	imerss.org:PMLS:12300			Count: few		Andy Lamb								PRESENT				Myxicola sp.B					iNaturalist:49533								Myxicola infundibulum							Animalia	Annelida	Polychaeta	Sabellida	Sabellidae	Myxicola	infundibulum		species
	imerss.org:PMLS:12368			Count: some		Andy Lamb								PRESENT				Serpula columbiana					iNaturalist:131207								Serpula columbiana							Animalia	Annelida	Polychaeta	Sabellida	Serpulidae	Serpula	columbiana		species		Johnson, 1901
	imerss.org:PMLS:12369			Count: abundant		Andy Lamb								PRESENT				Pileolaria spp.					iNaturalist:533325								Pileolaria							Animalia	Annelida	Polychaeta	Sabellida	Serpulidae	Pileolaria			genus
	imerss.org:PMLS:12370			Count: abundant		Andy Lamb								PRESENT				Dodecaceria fewkesi					iNaturalist:192656								Dodecaceria fewkesi							Animalia	Annelida	Polychaeta	Terebellida	Cirratulidae	Dodecaceria	fewkesi		species		Berkeley & Berkeley, 1954
	imerss.org:PMLS:12450			Count: few		Andy Lamb								PRESENT				Protula pacifica					iNaturalist:538108								Protula pacifica							Animalia	Annelida	Polychaeta	Sabellida	Serpulidae	Protula	pacifica		species		Pixell, 1912
	imerss.org:PMLS:12451			Count: many		Andy Lamb								PRESENT				Serpula columbiana					iNaturalist:131207								Serpula columbiana							Animalia	Annelida	Polychaeta	Sabellida	Serpulidae	Serpula	columbiana		species		Johnson, 1901
	imerss.org:PMLS:12452			Count: few		Andy Lamb								PRESENT				Dodecaceria fewkesi					iNaturalist:192656								Dodecaceria fewkesi							Animalia	Annelida	Polychaeta	Terebellida	Cirratulidae	Dodecaceria	fewkesi		species		Berkeley & Berkeley, 1954
	imerss.org:PMLS:12453			Count: few		Andy Lamb								PRESENT				Myxicola sp.B					iNaturalist:49533								Myxicola infundibulum							Animalia	Annelida	Polychaeta	Sabellida	Sabellidae	Myxicola	infundibulum		species
	imerss.org:PMLS:12454			Count: some		Andy Lamb								PRESENT				Pista elongata					iNaturalist:338339								Pista elongata							Animalia	Annelida	Polychaeta	Terebellida	Terebellidae	Pista	elongata		species		Moore, 1909
	imerss.org:PMLS:12455			Count: few		Andy Lamb								PRESENT				Thelepus spp.					iNaturalist:117588								Thelepus							Animalia	Annelida	Polychaeta	Terebellida	Terebellidae	Thelepus			genus
	imerss.org:PMLS:12531			Count: some		Andy Lamb								PRESENT				Protula pacifica					iNaturalist:538108								Protula pacifica							Animalia	Annelida	Polychaeta	Sabellida	Serpulidae	Protula	pacifica		species		Pixell, 1912
	imerss.org:PMLS:12532			Count: very many		Andy Lamb								PRESENT				Serpula columbiana					iNaturalist:131207								Serpula columbiana							Animalia	Annelida	Polychaeta	Sabellida	Serpulidae	Serpula	columbiana		species		Johnson, 1901
	imerss.org:PMLS:12533			Count: very many		Andy Lamb								PRESENT				Crucigera spp.					iNaturalist:543578								Crucigera							Animalia	Annelida	Polychaeta	Sabellida	Serpulidae	Crucigera			genus
	imerss.org:PMLS:12534			Count: very many		Andy Lamb								PRESENT				Dodecaceria fewkesi					iNaturalist:192656								Dodecaceria fewkesi							Animalia	Annelida	Polychaeta	Terebellida	Cirratulidae	Dodecaceria	fewkesi		species		Berkeley & Berkeley, 1954
	imerss.org:PMLS:12535			Count: few		Andy Lamb								PRESENT				Chone aurantiaca					iNaturalist:356415								Chone aurantiaca							Animalia	Annelida	Polychaeta	Sabellida	Sabellidae	Chone	aurantiaca		species		(Johnson, 1901)
	imerss.org:PMLS:12536			Count: some		Andy Lamb								PRESENT				Eudistylia vancouveri					iNaturalist:84864								Eudistylia vancouveri							Animalia	Annelida	Polychaeta	Sabellida	Sabellidae	Eudistylia	vancouveri		species		(Kinberg, 1866)
	imerss.org:PMLS:12537			Count: some		Andy Lamb								PRESENT				Myxicola sp.B					iNaturalist:49533								Myxicola infundibulum							Animalia	Annelida	Polychaeta	Sabellida	Sabellidae	Myxicola	infundibulum		species
	imerss.org:PMLS:12538			Count: many		Andy Lamb								PRESENT				Pista elongata					iNaturalist:338339								Pista elongata							Animalia	Annelida	Polychaeta	Terebellida	Terebellidae	Pista	elongata		species		Moore, 1909
	imerss.org:PMLS:12635			Count: some		Andy Lamb								PRESENT				Serpula columbiana					iNaturalist:131207								Serpula columbiana							Animalia	Annelida	Polychaeta	Sabellida	Serpulidae	Serpula	columbiana		species		Johnson, 1901
	imerss.org:PMLS:12636			Count: many		Andy Lamb								PRESENT				Dodecaceria fewkesi					iNaturalist:192656								Dodecaceria fewkesi							Animalia	Annelida	Polychaeta	Terebellida	Cirratulidae	Dodecaceria	fewkesi		species		Berkeley & Berkeley, 1954
	imerss.org:PMLS:12637			Count: few		Andy Lamb								PRESENT				Myxicola sp.B					iNaturalist:49533								Myxicola infundibulum							Animalia	Annelida	Polychaeta	Sabellida	Sabellidae	Myxicola	infundibulum		species
	imerss.org:PMLS:12638			Count: few		Andy Lamb								PRESENT				Pista elongata					iNaturalist:338339								Pista elongata							Animalia	Annelida	Polychaeta	Terebellida	Terebellidae	Pista	elongata		species		Moore, 1909
	imerss.org:PMLS:12715			Count: some		Andy Lamb								PRESENT				Protula pacifica					iNaturalist:538108								Protula pacifica							Animalia	Annelida	Polychaeta	Sabellida	Serpulidae	Protula	pacifica		species		Pixell, 1912
	imerss.org:PMLS:12716			Count: very many		Andy Lamb								PRESENT				Serpula columbiana					iNaturalist:131207								Serpula columbiana							Animalia	Annelida	Polychaeta	Sabellida	Serpulidae	Serpula	columbiana		species		Johnson, 1901
	imerss.org:PMLS:12717			Count: many		Andy Lamb								PRESENT				Dodecaceria fewkesi					iNaturalist:192656								Dodecaceria fewkesi							Animalia	Annelida	Polychaeta	Terebellida	Cirratulidae	Dodecaceria	fewkesi		species		Berkeley & Berkeley, 1954
	imerss.org:PMLS:12718			Count: few		Andy Lamb								PRESENT				Eudistylia vancouveri					iNaturalist:84864								Eudistylia vancouveri							Animalia	Annelida	Polychaeta	Sabellida	Sabellidae	Eudistylia	vancouveri		species		(Kinberg, 1866)
	imerss.org:PMLS:12719			Count: few		Andy Lamb								PRESENT				Myxicola sp.B					iNaturalist:49533								Myxicola infundibulum							Animalia	Annelida	Polychaeta	Sabellida	Sabellidae	Myxicola	infundibulum		species
	imerss.org:PMLS:12720			Count: few		Andy Lamb								PRESENT				Thelepus spp.					iNaturalist:117588								Thelepus							Animalia	Annelida	Polychaeta	Terebellida	Terebellidae	Thelepus			genus
	imerss.org:PMLS:12835			Count: few		Andy Lamb								PRESENT				Protula pacifica					iNaturalist:538108								Protula pacifica							Animalia	Annelida	Polychaeta	Sabellida	Serpulidae	Protula	pacifica		species		Pixell, 1912
	imerss.org:PMLS:12836			Count: many		Andy Lamb								PRESENT				Serpula columbiana					iNaturalist:131207								Serpula columbiana							Animalia	Annelida	Polychaeta	Sabellida	Serpulidae	Serpula	columbiana		species		Johnson, 1901
	imerss.org:PMLS:12837			Count: abundant		Andy Lamb								PRESENT				Dodecaceria fewkesi					iNaturalist:192656								Dodecaceria fewkesi							Animalia	Annelida	Polychaeta	Terebellida	Cirratulidae	Dodecaceria	fewkesi		species		Berkeley & Berkeley, 1954
	imerss.org:PMLS:12838			Count: some		Andy Lamb								PRESENT				Chone aurantiaca					iNaturalist:356415								Chone aurantiaca							Animalia	Annelida	Polychaeta	Sabellida	Sabellidae	Chone	aurantiaca		species		(Johnson, 1901)
	imerss.org:PMLS:12839					Andy Lamb		2						PRESENT				Parasabella media					iNaturalist:367054								Parasabella media							Animalia	Annelida	Polychaeta	Sabellida	Sabellidae	Parasabella	media		species		Bush, 1905
	imerss.org:PMLS:12840			Count: few		Andy Lamb								PRESENT				Eudistylia vancouveri					iNaturalist:84864								Eudistylia vancouveri							Animalia	Annelida	Polychaeta	Sabellida	Sabellidae	Eudistylia	vancouveri		species		(Kinberg, 1866)
	imerss.org:PMLS:12841			Count: some		Andy Lamb								PRESENT				Myxicola sp.B					iNaturalist:49533								Myxicola infundibulum							Animalia	Annelida	Polychaeta	Sabellida	Sabellidae	Myxicola	infundibulum		species
	imerss.org:PMLS:12842			Count: many		Andy Lamb								PRESENT				Pista elongata					iNaturalist:338339								Pista elongata							Animalia	Annelida	Polychaeta	Terebellida	Terebellidae	Pista	elongata		species		Moore, 1909
	imerss.org:PMLS:12843			Count: few		Andy Lamb								PRESENT				Thelepus spp.					iNaturalist:117588								Thelepus							Animalia	Annelida	Polychaeta	Terebellida	Terebellidae	Thelepus			genus
	imerss.org:PMLS:12844			Count: some		Andy Lamb								PRESENT				Phyllochaetopterus sp.					iNaturalist:374226								Phyllochaetopterus							Animalia	Annelida	Polychaeta		Chaetopteridae	Phyllochaetopterus			genus
	imerss.org:PMLS:12960			Count: very many		Andy Lamb								PRESENT				Serpula columbiana					iNaturalist:131207								Serpula columbiana							Animalia	Annelida	Polychaeta	Sabellida	Serpulidae	Serpula	columbiana		species		Johnson, 1901
	imerss.org:PMLS:12961			Count: many		Andy Lamb								PRESENT				Crucigera spp.					iNaturalist:543578								Crucigera							Animalia	Annelida	Polychaeta	Sabellida	Serpulidae	Crucigera			genus
	imerss.org:PMLS:12962			Count: abundant		Andy Lamb								PRESENT				Dodecaceria fewkesi					iNaturalist:192656								Dodecaceria fewkesi							Animalia	Annelida	Polychaeta	Terebellida	Cirratulidae	Dodecaceria	fewkesi		species		Berkeley & Berkeley, 1954
	imerss.org:PMLS:12963			Count: some		Andy Lamb								PRESENT				Chone aurantiaca					iNaturalist:356415								Chone aurantiaca							Animalia	Annelida	Polychaeta	Sabellida	Sabellidae	Chone	aurantiaca		species		(Johnson, 1901)
	imerss.org:PMLS:12964					Andy Lamb		3						PRESENT				Eudistylia vancouveri					iNaturalist:84864								Eudistylia vancouveri							Animalia	Annelida	Polychaeta	Sabellida	Sabellidae	Eudistylia	vancouveri		species		(Kinberg, 1866)
	imerss.org:PMLS:12965			Count: few		Andy Lamb								PRESENT				Myxicola sp.B					iNaturalist:49533								Myxicola infundibulum							Animalia	Annelida	Polychaeta	Sabellida	Sabellidae	Myxicola	infundibulum		species
	imerss.org:PMLS:12966			Count: few		Andy Lamb								PRESENT				Thelepus spp.					iNaturalist:117588								Thelepus							Animalia	Annelida	Polychaeta	Terebellida	Terebellidae	Thelepus			genus
	imerss.org:PMLS:12967			Count: some		Andy Lamb								PRESENT				Spiochaetopterus costarum pottsi					iNaturalist:130236								Spiochaetopterus costarum							Animalia	Annelida	Polychaeta		Chaetopteridae	Spiochaetopterus	costarum		species		(Claparède, 1869)
	imerss.org:PMLS:13060			Count: some		Andy Lamb								PRESENT				Tomopteris sp.					iNaturalist:194976								Tomopteris							Animalia	Annelida	Polychaeta	Phyllodocida	Tomopteridae	Tomopteris			genus
	imerss.org:PMLS:13061			Count: few		Andy Lamb								PRESENT				Protula pacifica					iNaturalist:538108								Protula pacifica							Animalia	Annelida	Polychaeta	Sabellida	Serpulidae	Protula	pacifica		species		Pixell, 1912
	imerss.org:PMLS:13062			Count: many		Andy Lamb								PRESENT				Serpula columbiana					iNaturalist:131207								Serpula columbiana							Animalia	Annelida	Polychaeta	Sabellida	Serpulidae	Serpula	columbiana		species		Johnson, 1901
	imerss.org:PMLS:13063			Count: some		Andy Lamb								PRESENT				Dodecaceria fewkesi					iNaturalist:192656								Dodecaceria fewkesi							Animalia	Annelida	Polychaeta	Terebellida	Cirratulidae	Dodecaceria	fewkesi		species		Berkeley & Berkeley, 1954
	imerss.org:PMLS:13064			Count: many		Andy Lamb								PRESENT				Chone aurantiaca					iNaturalist:356415								Chone aurantiaca							Animalia	Annelida	Polychaeta	Sabellida	Sabellidae	Chone	aurantiaca		species		(Johnson, 1901)
	imerss.org:PMLS:13065			Count: very many		Andy Lamb								PRESENT				Myxicola sp.B					iNaturalist:49533								Myxicola infundibulum							Animalia	Annelida	Polychaeta	Sabellida	Sabellidae	Myxicola	infundibulum		species
	imerss.org:PMLS:13066			Count: few		Andy Lamb								PRESENT				Bispira pacifica					iNaturalist:1199401								Bispira pacifica							Animalia	Annelida	Polychaeta	Sabellida	Sabellidae	Bispira	pacifica		species		(Berkeley & Berkeley, 1954)
	imerss.org:PMLS:13067			Count: some		Andy Lamb								PRESENT				Thelepus spp.					iNaturalist:117588								Thelepus							Animalia	Annelida	Polychaeta	Terebellida	Terebellidae	Thelepus			genus
	imerss.org:PMLS:13068			Count: very many		Andy Lamb								PRESENT				Spiochaetopterus costarum pottsi					iNaturalist:130236								Spiochaetopterus costarum							Animalia	Annelida	Polychaeta		Chaetopteridae	Spiochaetopterus	costarum		species		(Claparède, 1869)
	imerss.org:PMLS:13163			Count: some		Andy Lamb								PRESENT				Arctonoe fragilis					iNaturalist:69914								Arctonoe fragilis							Animalia	Annelida	Polychaeta	Phyllodocida	Polynoidae	Arctonoe	fragilis		species		(Baird, 1863)
	imerss.org:PMLS:13164			Count: few		Andy Lamb								PRESENT				Protula pacifica					iNaturalist:538108								Protula pacifica							Animalia	Annelida	Polychaeta	Sabellida	Serpulidae	Protula	pacifica		species		Pixell, 1912
	imerss.org:PMLS:13165			Count: abundant		Andy Lamb								PRESENT				Serpula columbiana					iNaturalist:131207								Serpula columbiana							Animalia	Annelida	Polychaeta	Sabellida	Serpulidae	Serpula	columbiana		species		Johnson, 1901
	imerss.org:PMLS:13166			Count: abundant		Andy Lamb								PRESENT				Dodecaceria fewkesi					iNaturalist:192656								Dodecaceria fewkesi							Animalia	Annelida	Polychaeta	Terebellida	Cirratulidae	Dodecaceria	fewkesi		species		Berkeley & Berkeley, 1954
	imerss.org:PMLS:13167			Count: few		Andy Lamb								PRESENT				Myxicola sp.B					iNaturalist:49533								Myxicola infundibulum							Animalia	Annelida	Polychaeta	Sabellida	Sabellidae	Myxicola	infundibulum		species
	imerss.org:PMLS:13292			Count: very many		Andy Lamb								PRESENT				Serpula columbiana					iNaturalist:131207								Serpula columbiana							Animalia	Annelida	Polychaeta	Sabellida	Serpulidae	Serpula	columbiana		species		Johnson, 1901
	imerss.org:PMLS:13293			Count: very abundant		Andy Lamb								PRESENT				Dodecaceria fewkesi					iNaturalist:192656								Dodecaceria fewkesi							Animalia	Annelida	Polychaeta	Terebellida	Cirratulidae	Dodecaceria	fewkesi		species		Berkeley & Berkeley, 1954
	imerss.org:PMLS:13294			Count: few		Andy Lamb								PRESENT				Eudistylia vancouveri					iNaturalist:84864								Eudistylia vancouveri							Animalia	Annelida	Polychaeta	Sabellida	Sabellidae	Eudistylia	vancouveri		species		(Kinberg, 1866)
	imerss.org:PMLS:13295			Count: many		Andy Lamb								PRESENT				Myxicola sp.B					iNaturalist:49533								Myxicola infundibulum							Animalia	Annelida	Polychaeta	Sabellida	Sabellidae	Myxicola	infundibulum		species
	imerss.org:PMLS:13296			Count: few		Andy Lamb								PRESENT				Pista elongata					iNaturalist:338339								Pista elongata							Animalia	Annelida	Polychaeta	Terebellida	Terebellidae	Pista	elongata		species		Moore, 1909
	imerss.org:PMLS:13400			Count: few		Andy Lamb								PRESENT				Protula pacifica					iNaturalist:538108								Protula pacifica							Animalia	Annelida	Polychaeta	Sabellida	Serpulidae	Protula	pacifica		species		Pixell, 1912
	imerss.org:PMLS:13401			Count: very many		Andy Lamb								PRESENT				Serpula columbiana					iNaturalist:131207								Serpula columbiana							Animalia	Annelida	Polychaeta	Sabellida	Serpulidae	Serpula	columbiana		species		Johnson, 1901
	imerss.org:PMLS:13402			Count: some		Andy Lamb								PRESENT				Dodecaceria fewkesi					iNaturalist:192656								Dodecaceria fewkesi							Animalia	Annelida	Polychaeta	Terebellida	Cirratulidae	Dodecaceria	fewkesi		species		Berkeley & Berkeley, 1954
	imerss.org:PMLS:13403					Andy Lamb		1						PRESENT				Parasabella media					iNaturalist:367054								Parasabella media							Animalia	Annelida	Polychaeta	Sabellida	Sabellidae	Parasabella	media		species		Bush, 1905
	imerss.org:PMLS:13404			Count: few		Andy Lamb								PRESENT				Myxicola sp.B					iNaturalist:49533								Myxicola infundibulum							Animalia	Annelida	Polychaeta	Sabellida	Sabellidae	Myxicola	infundibulum		species
	imerss.org:PMLS:13405			Count: few		Andy Lamb								PRESENT				Thelepus spp.					iNaturalist:117588								Thelepus							Animalia	Annelida	Polychaeta	Terebellida	Terebellidae	Thelepus			genus
	imerss.org:PMLS:13485			Count: very many		Andy Lamb								PRESENT				Serpula columbiana					iNaturalist:131207								Serpula columbiana							Animalia	Annelida	Polychaeta	Sabellida	Serpulidae	Serpula	columbiana		species		Johnson, 1901
	imerss.org:PMLS:13486			Count: abundant		Andy Lamb								PRESENT				Dodecaceria fewkesi					iNaturalist:192656								Dodecaceria fewkesi							Animalia	Annelida	Polychaeta	Terebellida	Cirratulidae	Dodecaceria	fewkesi		species		Berkeley & Berkeley, 1954
	imerss.org:PMLS:13487			Count: few		Andy Lamb								PRESENT				Eudistylia vancouveri					iNaturalist:84864								Eudistylia vancouveri							Animalia	Annelida	Polychaeta	Sabellida	Sabellidae	Eudistylia	vancouveri		species		(Kinberg, 1866)
	imerss.org:PMLS:13488			Count: some		Andy Lamb								PRESENT				Myxicola sp.B					iNaturalist:49533								Myxicola infundibulum							Animalia	Annelida	Polychaeta	Sabellida	Sabellidae	Myxicola	infundibulum		species
	imerss.org:PMLS:13571			Count: some		Andy Lamb								PRESENT				Serpula columbiana					iNaturalist:131207								Serpula columbiana							Animalia	Annelida	Polychaeta	Sabellida	Serpulidae	Serpula	columbiana		species		Johnson, 1901
	imerss.org:PMLS:13572			Count: many		Andy Lamb								PRESENT				Dodecaceria fewkesi					iNaturalist:192656								Dodecaceria fewkesi							Animalia	Annelida	Polychaeta	Terebellida	Cirratulidae	Dodecaceria	fewkesi		species		Berkeley & Berkeley, 1954
	imerss.org:PMLS:13573					Andy Lamb		2						PRESENT				Chone aurantiaca					iNaturalist:356415								Chone aurantiaca							Animalia	Annelida	Polychaeta	Sabellida	Sabellidae	Chone	aurantiaca		species		(Johnson, 1901)
	imerss.org:PMLS:13574			Count: some		Andy Lamb								PRESENT				Myxicola sp.B					iNaturalist:49533								Myxicola infundibulum							Animalia	Annelida	Polychaeta	Sabellida	Sabellidae	Myxicola	infundibulum		species
	imerss.org:PMLS:13671			Count: some		Andy Lamb								PRESENT				Serpula columbiana					iNaturalist:131207								Serpula columbiana							Animalia	Annelida	Polychaeta	Sabellida	Serpulidae	Serpula	columbiana		species		Johnson, 1901
	imerss.org:PMLS:13672			Count: abundant		Andy Lamb								PRESENT				Dodecaceria fewkesi					iNaturalist:192656								Dodecaceria fewkesi							Animalia	Annelida	Polychaeta	Terebellida	Cirratulidae	Dodecaceria	fewkesi		species		Berkeley & Berkeley, 1954
	imerss.org:PMLS:13673			Count: some		Andy Lamb								PRESENT				Myxicola sp.B					iNaturalist:49533								Myxicola infundibulum							Animalia	Annelida	Polychaeta	Sabellida	Sabellidae	Myxicola	infundibulum		species
	imerss.org:PMLS:13674			Count: few		Andy Lamb								PRESENT				Pista elongata					iNaturalist:338339								Pista elongata							Animalia	Annelida	Polychaeta	Terebellida	Terebellidae	Pista	elongata		species		Moore, 1909
	imerss.org:PMLS:13675			Count: few		Andy Lamb								PRESENT				Thelepus spp.					iNaturalist:117588								Thelepus							Animalia	Annelida	Polychaeta	Terebellida	Terebellidae	Thelepus			genus
	imerss.org:PMLS:13676					Andy Lamb		2						PRESENT				Phyllochaetopterus prolifica					iNaturalist:467241								Phyllochaetopterus prolifica							Animalia	Annelida	Polychaeta		Chaetopteridae	Phyllochaetopterus	prolifica		species		Potts, 1914
	imerss.org:PMLS:13789			Count: some		Andy Lamb								PRESENT				Serpula columbiana					iNaturalist:131207								Serpula columbiana							Animalia	Annelida	Polychaeta	Sabellida	Serpulidae	Serpula	columbiana		species		Johnson, 1901
	imerss.org:PMLS:13790			Count: many		Andy Lamb								PRESENT				Dodecaceria fewkesi					iNaturalist:192656								Dodecaceria fewkesi							Animalia	Annelida	Polychaeta	Terebellida	Cirratulidae	Dodecaceria	fewkesi		species		Berkeley & Berkeley, 1954
	imerss.org:PMLS:13791			Count: some		Andy Lamb								PRESENT				Myxicola sp.B					iNaturalist:49533								Myxicola infundibulum							Animalia	Annelida	Polychaeta	Sabellida	Sabellidae	Myxicola	infundibulum		species
	imerss.org:PMLS:13870			Count: few		Andy Lamb								PRESENT				Protula pacifica					iNaturalist:538108								Protula pacifica							Animalia	Annelida	Polychaeta	Sabellida	Serpulidae	Protula	pacifica		species		Pixell, 1912
	imerss.org:PMLS:13871			Count: many		Andy Lamb								PRESENT				Serpula columbiana					iNaturalist:131207								Serpula columbiana							Animalia	Annelida	Polychaeta	Sabellida	Serpulidae	Serpula	columbiana		species		Johnson, 1901
	imerss.org:PMLS:13872			Count: very many		Andy Lamb								PRESENT				Pileolaria spp.					iNaturalist:533325								Pileolaria							Animalia	Annelida	Polychaeta	Sabellida	Serpulidae	Pileolaria			genus
	imerss.org:PMLS:13873			Count: abundant		Andy Lamb								PRESENT				Dodecaceria fewkesi					iNaturalist:192656								Dodecaceria fewkesi							Animalia	Annelida	Polychaeta	Terebellida	Cirratulidae	Dodecaceria	fewkesi		species		Berkeley & Berkeley, 1954
	imerss.org:PMLS:13874			Count: few		Andy Lamb								PRESENT				Parasabella media					iNaturalist:367054								Parasabella media							Animalia	Annelida	Polychaeta	Sabellida	Sabellidae	Parasabella	media		species		Bush, 1905
	imerss.org:PMLS:13875					Andy Lamb		2						PRESENT				Eudistylia vancouveri					iNaturalist:84864								Eudistylia vancouveri							Animalia	Annelida	Polychaeta	Sabellida	Sabellidae	Eudistylia	vancouveri		species		(Kinberg, 1866)
	imerss.org:PMLS:13876			Count: some		Andy Lamb								PRESENT				Myxicola sp.B					iNaturalist:49533								Myxicola infundibulum							Animalia	Annelida	Polychaeta	Sabellida	Sabellidae	Myxicola	infundibulum		species
	imerss.org:PMLS:13877					Andy Lamb		1						PRESENT				Bispira pacifica					iNaturalist:1199401								Bispira pacifica							Animalia	Annelida	Polychaeta	Sabellida	Sabellidae	Bispira	pacifica		species		(Berkeley & Berkeley, 1954)
	imerss.org:PMLS:13878			Count: few		Andy Lamb								PRESENT				Pista elongata					iNaturalist:338339								Pista elongata							Animalia	Annelida	Polychaeta	Terebellida	Terebellidae	Pista	elongata		species		Moore, 1909
	imerss.org:PMLS:13879			Count: few		Andy Lamb								PRESENT				Thelepus spp.					iNaturalist:117588								Thelepus							Animalia	Annelida	Polychaeta	Terebellida	Terebellidae	Thelepus			genus
	imerss.org:PMLS:13979			Count: few		Andy Lamb								PRESENT				Protula pacifica					iNaturalist:538108								Protula pacifica							Animalia	Annelida	Polychaeta	Sabellida	Serpulidae	Protula	pacifica		species		Pixell, 1912
	imerss.org:PMLS:13980			Count: some		Andy Lamb								PRESENT				Serpula columbiana					iNaturalist:131207								Serpula columbiana							Animalia	Annelida	Polychaeta	Sabellida	Serpulidae	Serpula	columbiana		species		Johnson, 1901
	imerss.org:PMLS:13981			Count: many		Andy Lamb								PRESENT				Dodecaceria fewkesi					iNaturalist:192656								Dodecaceria fewkesi							Animalia	Annelida	Polychaeta	Terebellida	Cirratulidae	Dodecaceria	fewkesi		species		Berkeley & Berkeley, 1954
	imerss.org:PMLS:13982			Count: many		Andy Lamb								PRESENT				Myxicola sp.B					iNaturalist:49533								Myxicola infundibulum							Animalia	Annelida	Polychaeta	Sabellida	Sabellidae	Myxicola	infundibulum		species
	imerss.org:PMLS:13983			Count: few		Andy Lamb								PRESENT				Pista elongata					iNaturalist:338339								Pista elongata							Animalia	Annelida	Polychaeta	Terebellida	Terebellidae	Pista	elongata		species		Moore, 1909
	imerss.org:PMLS:14045			Count: some		Andy Lamb								PRESENT				Diopatra ornata					iNaturalist:339286								Diopatra ornata							Animalia	Annelida	Polychaeta	Eunicida	Onuphidae	Diopatra	ornata		species		Moore, 1911
	imerss.org:PMLS:14046			Count: few		Andy Lamb								PRESENT				Protula pacifica					iNaturalist:538108								Protula pacifica							Animalia	Annelida	Polychaeta	Sabellida	Serpulidae	Protula	pacifica		species		Pixell, 1912
	imerss.org:PMLS:14047			Count: some		Andy Lamb								PRESENT				Serpula columbiana					iNaturalist:131207								Serpula columbiana							Animalia	Annelida	Polychaeta	Sabellida	Serpulidae	Serpula	columbiana		species		Johnson, 1901
	imerss.org:PMLS:14048			Count: some		Andy Lamb								PRESENT				Dodecaceria fewkesi					iNaturalist:192656								Dodecaceria fewkesi							Animalia	Annelida	Polychaeta	Terebellida	Cirratulidae	Dodecaceria	fewkesi		species		Berkeley & Berkeley, 1954
	imerss.org:PMLS:14049			Count: few		Andy Lamb								PRESENT				Myxicola sp.B					iNaturalist:49533								Myxicola infundibulum							Animalia	Annelida	Polychaeta	Sabellida	Sabellidae	Myxicola	infundibulum		species
	imerss.org:PMLS:14118			Count: some		Andy Lamb								PRESENT				Serpula columbiana					iNaturalist:131207								Serpula columbiana							Animalia	Annelida	Polychaeta	Sabellida	Serpulidae	Serpula	columbiana		species		Johnson, 1901
	imerss.org:PMLS:14119			Count: abundant		Andy Lamb								PRESENT				Dodecaceria fewkesi					iNaturalist:192656								Dodecaceria fewkesi							Animalia	Annelida	Polychaeta	Terebellida	Cirratulidae	Dodecaceria	fewkesi		species		Berkeley & Berkeley, 1954
	imerss.org:PMLS:14120			Count: few		Andy Lamb								PRESENT				Myxicola sp.B					iNaturalist:49533								Myxicola infundibulum							Animalia	Annelida	Polychaeta	Sabellida	Sabellidae	Myxicola	infundibulum		species
	imerss.org:PMLS:14186			Count: some		Andy Lamb								PRESENT				Serpula columbiana					iNaturalist:131207								Serpula columbiana							Animalia	Annelida	Polychaeta	Sabellida	Serpulidae	Serpula	columbiana		species		Johnson, 1901
	imerss.org:PMLS:14187			Count: abundant		Andy Lamb								PRESENT				Dodecaceria fewkesi					iNaturalist:192656								Dodecaceria fewkesi							Animalia	Annelida	Polychaeta	Terebellida	Cirratulidae	Dodecaceria	fewkesi		species		Berkeley & Berkeley, 1954
	imerss.org:PMLS:14188			Count: few		Andy Lamb								PRESENT				Eudistylia vancouveri					iNaturalist:84864								Eudistylia vancouveri							Animalia	Annelida	Polychaeta	Sabellida	Sabellidae	Eudistylia	vancouveri		species		(Kinberg, 1866)
	imerss.org:PMLS:14277					Andy Lamb		2						PRESENT				Protula pacifica					iNaturalist:538108								Protula pacifica							Animalia	Annelida	Polychaeta	Sabellida	Serpulidae	Protula	pacifica		species		Pixell, 1912
	imerss.org:PMLS:14278			Count: some		Andy Lamb								PRESENT				Serpula columbiana					iNaturalist:131207								Serpula columbiana							Animalia	Annelida	Polychaeta	Sabellida	Serpulidae	Serpula	columbiana		species		Johnson, 1901
	imerss.org:PMLS:14279			Count: very many		Andy Lamb								PRESENT				Dodecaceria fewkesi					iNaturalist:192656								Dodecaceria fewkesi							Animalia	Annelida	Polychaeta	Terebellida	Cirratulidae	Dodecaceria	fewkesi		species		Berkeley & Berkeley, 1954
	imerss.org:PMLS:14280			Count: some		Andy Lamb								PRESENT				Myxicola sp.B					iNaturalist:49533								Myxicola infundibulum							Animalia	Annelida	Polychaeta	Sabellida	Sabellidae	Myxicola	infundibulum		species
	imerss.org:PMLS:14375			Count: many		Andy Lamb								PRESENT				Serpula columbiana					iNaturalist:131207								Serpula columbiana							Animalia	Annelida	Polychaeta	Sabellida	Serpulidae	Serpula	columbiana		species		Johnson, 1901
	imerss.org:PMLS:14376			Count: very abundant		Andy Lamb								PRESENT				Dodecaceria fewkesi					iNaturalist:192656								Dodecaceria fewkesi							Animalia	Annelida	Polychaeta	Terebellida	Cirratulidae	Dodecaceria	fewkesi		species		Berkeley & Berkeley, 1954
	imerss.org:PMLS:14377			Count: many		Andy Lamb								PRESENT				Chone aurantiaca					iNaturalist:356415								Chone aurantiaca							Animalia	Annelida	Polychaeta	Sabellida	Sabellidae	Chone	aurantiaca		species		(Johnson, 1901)
	imerss.org:PMLS:14378					Andy Lamb		2						PRESENT				Eudistylia vancouveri					iNaturalist:84864								Eudistylia vancouveri							Animalia	Annelida	Polychaeta	Sabellida	Sabellidae	Eudistylia	vancouveri		species		(Kinberg, 1866)
	imerss.org:PMLS:14379			Count: very many		Andy Lamb								PRESENT				Myxicola sp.B					iNaturalist:49533								Myxicola infundibulum							Animalia	Annelida	Polychaeta	Sabellida	Sabellidae	Myxicola	infundibulum		species
	imerss.org:PMLS:14380			Count: many		Andy Lamb								PRESENT				Pista elongata					iNaturalist:338339								Pista elongata							Animalia	Annelida	Polychaeta	Terebellida	Terebellidae	Pista	elongata		species		Moore, 1909
	imerss.org:PMLS:14468					Andy Lamb		1						PRESENT				Arctonoe fragilis					iNaturalist:69914								Arctonoe fragilis							Animalia	Annelida	Polychaeta	Phyllodocida	Polynoidae	Arctonoe	fragilis		species		(Baird, 1863)
	imerss.org:PMLS:14469			Count: some		Andy Lamb								PRESENT				Serpula columbiana					iNaturalist:131207								Serpula columbiana							Animalia	Annelida	Polychaeta	Sabellida	Serpulidae	Serpula	columbiana		species		Johnson, 1901
	imerss.org:PMLS:14470			Count: very many		Andy Lamb								PRESENT				Dodecaceria fewkesi					iNaturalist:192656								Dodecaceria fewkesi							Animalia	Annelida	Polychaeta	Terebellida	Cirratulidae	Dodecaceria	fewkesi		species		Berkeley & Berkeley, 1954
	imerss.org:PMLS:14471			Count: few		Andy Lamb								PRESENT				Eudistylia vancouveri					iNaturalist:84864								Eudistylia vancouveri							Animalia	Annelida	Polychaeta	Sabellida	Sabellidae	Eudistylia	vancouveri		species		(Kinberg, 1866)
	imerss.org:PMLS:14472			Count: some		Andy Lamb								PRESENT				Myxicola sp.B					iNaturalist:49533								Myxicola infundibulum							Animalia	Annelida	Polychaeta	Sabellida	Sabellidae	Myxicola	infundibulum		species
	imerss.org:PMLS:14549			Count: few		Andy Lamb								PRESENT				Protula pacifica					iNaturalist:538108								Protula pacifica							Animalia	Annelida	Polychaeta	Sabellida	Serpulidae	Protula	pacifica		species		Pixell, 1912
	imerss.org:PMLS:14550			Count: some		Andy Lamb								PRESENT				Serpula columbiana					iNaturalist:131207								Serpula columbiana							Animalia	Annelida	Polychaeta	Sabellida	Serpulidae	Serpula	columbiana		species		Johnson, 1901
	imerss.org:PMLS:14551			Count: few		Andy Lamb								PRESENT				Dodecaceria fewkesi					iNaturalist:192656								Dodecaceria fewkesi							Animalia	Annelida	Polychaeta	Terebellida	Cirratulidae	Dodecaceria	fewkesi		species		Berkeley & Berkeley, 1954
	imerss.org:PMLS:14552			Count: few		Andy Lamb								PRESENT				Chone aurantiaca					iNaturalist:356415								Chone aurantiaca							Animalia	Annelida	Polychaeta	Sabellida	Sabellidae	Chone	aurantiaca		species		(Johnson, 1901)
	imerss.org:PMLS:14553			Count: some		Andy Lamb								PRESENT				Myxicola sp.B					iNaturalist:49533								Myxicola infundibulum							Animalia	Annelida	Polychaeta	Sabellida	Sabellidae	Myxicola	infundibulum		species
	imerss.org:PMLS:14554					Andy Lamb		1						PRESENT				Bispira pacifica					iNaturalist:1199401								Bispira pacifica							Animalia	Annelida	Polychaeta	Sabellida	Sabellidae	Bispira	pacifica		species		(Berkeley & Berkeley, 1954)
	imerss.org:PMLS:14555					Andy Lamb		3						PRESENT				Thelepus spp.					iNaturalist:117588								Thelepus							Animalia	Annelida	Polychaeta	Terebellida	Terebellidae	Thelepus			genus
	imerss.org:PMLS:14642			Count: very many		Andy Lamb								PRESENT				Serpula columbiana					iNaturalist:131207								Serpula columbiana							Animalia	Annelida	Polychaeta	Sabellida	Serpulidae	Serpula	columbiana		species		Johnson, 1901
	imerss.org:PMLS:14643			Count: abundant		Andy Lamb								PRESENT				Dodecaceria fewkesi					iNaturalist:192656								Dodecaceria fewkesi							Animalia	Annelida	Polychaeta	Terebellida	Cirratulidae	Dodecaceria	fewkesi		species		Berkeley & Berkeley, 1954
	imerss.org:PMLS:14644			Count: some		Andy Lamb								PRESENT				Myxicola sp.B					iNaturalist:49533								Myxicola infundibulum							Animalia	Annelida	Polychaeta	Sabellida	Sabellidae	Myxicola	infundibulum		species
	imerss.org:PMLS:14645					Andy Lamb		1						PRESENT				Thelepus spp.					iNaturalist:117588								Thelepus							Animalia	Annelida	Polychaeta	Terebellida	Terebellidae	Thelepus			genus
	imerss.org:PMLS:14743			Count: some		Andy Lamb								PRESENT				Serpula columbiana					iNaturalist:131207								Serpula columbiana							Animalia	Annelida	Polychaeta	Sabellida	Serpulidae	Serpula	columbiana		species		Johnson, 1901
	imerss.org:PMLS:14744			Count: many		Andy Lamb								PRESENT				Dodecaceria fewkesi					iNaturalist:192656								Dodecaceria fewkesi							Animalia	Annelida	Polychaeta	Terebellida	Cirratulidae	Dodecaceria	fewkesi		species		Berkeley & Berkeley, 1954
	imerss.org:PMLS:14745			Count: some		Andy Lamb								PRESENT				Chone aurantiaca					iNaturalist:356415								Chone aurantiaca							Animalia	Annelida	Polychaeta	Sabellida	Sabellidae	Chone	aurantiaca		species		(Johnson, 1901)
	imerss.org:PMLS:14746			Count: some		Andy Lamb								PRESENT				Myxicola sp.B					iNaturalist:49533								Myxicola infundibulum							Animalia	Annelida	Polychaeta	Sabellida	Sabellidae	Myxicola	infundibulum		species
	imerss.org:PMLS:14747			Count: few		Andy Lamb								PRESENT				Bispira pacifica					iNaturalist:1199401								Bispira pacifica							Animalia	Annelida	Polychaeta	Sabellida	Sabellidae	Bispira	pacifica		species		(Berkeley & Berkeley, 1954)
	imerss.org:PMLS:14748			Count: few		Andy Lamb								PRESENT				Pista elongata					iNaturalist:338339								Pista elongata							Animalia	Annelida	Polychaeta	Terebellida	Terebellidae	Pista	elongata		species		Moore, 1909
	imerss.org:PMLS:14846			Count: some		Andy Lamb								PRESENT				Serpula columbiana					iNaturalist:131207								Serpula columbiana							Animalia	Annelida	Polychaeta	Sabellida	Serpulidae	Serpula	columbiana		species		Johnson, 1901
	imerss.org:PMLS:14847			Count: abundant		Andy Lamb								PRESENT				Dodecaceria fewkesi					iNaturalist:192656								Dodecaceria fewkesi							Animalia	Annelida	Polychaeta	Terebellida	Cirratulidae	Dodecaceria	fewkesi		species		Berkeley & Berkeley, 1954
	imerss.org:PMLS:14848					Andy Lamb		2						PRESENT				Chone aurantiaca					iNaturalist:356415								Chone aurantiaca							Animalia	Annelida	Polychaeta	Sabellida	Sabellidae	Chone	aurantiaca		species		(Johnson, 1901)
	imerss.org:PMLS:14849					Andy Lamb		1						PRESENT				Parasabella media					iNaturalist:367054								Parasabella media							Animalia	Annelida	Polychaeta	Sabellida	Sabellidae	Parasabella	media		species		Bush, 1905
	imerss.org:PMLS:14850					Andy Lamb		2						PRESENT				Eudistylia vancouveri					iNaturalist:84864								Eudistylia vancouveri							Animalia	Annelida	Polychaeta	Sabellida	Sabellidae	Eudistylia	vancouveri		species		(Kinberg, 1866)
	imerss.org:PMLS:14851			Count: few		Andy Lamb								PRESENT				Myxicola sp.B					iNaturalist:49533								Myxicola infundibulum							Animalia	Annelida	Polychaeta	Sabellida	Sabellidae	Myxicola	infundibulum		species
	imerss.org:PMLS:14852			Count: few		Andy Lamb								PRESENT				Pista elongata					iNaturalist:338339								Pista elongata							Animalia	Annelida	Polychaeta	Terebellida	Terebellidae	Pista	elongata		species		Moore, 1909
	imerss.org:PMLS:14853					Andy Lamb		1						PRESENT				Thelepus spp.					iNaturalist:117588								Thelepus							Animalia	Annelida	Polychaeta	Terebellida	Terebellidae	Thelepus			genus
	imerss.org:PMLS:14958			Count: some		Andy Lamb								PRESENT				Diopatra ornata					iNaturalist:339286								Diopatra ornata							Animalia	Annelida	Polychaeta	Eunicida	Onuphidae	Diopatra	ornata		species		Moore, 1911
	imerss.org:PMLS:14959					Andy Lamb		2						PRESENT				Protula pacifica					iNaturalist:538108								Protula pacifica							Animalia	Annelida	Polychaeta	Sabellida	Serpulidae	Protula	pacifica		species		Pixell, 1912
	imerss.org:PMLS:14960			Count: some		Andy Lamb								PRESENT				Serpula columbiana					iNaturalist:131207								Serpula columbiana							Animalia	Annelida	Polychaeta	Sabellida	Serpulidae	Serpula	columbiana		species		Johnson, 1901
	imerss.org:PMLS:14961			Count: very many		Andy Lamb								PRESENT				Dodecaceria fewkesi					iNaturalist:192656								Dodecaceria fewkesi							Animalia	Annelida	Polychaeta	Terebellida	Cirratulidae	Dodecaceria	fewkesi		species		Berkeley & Berkeley, 1954
	imerss.org:PMLS:14962			Count: some		Andy Lamb								PRESENT				Myxicola sp.B					iNaturalist:49533								Myxicola infundibulum							Animalia	Annelida	Polychaeta	Sabellida	Sabellidae	Myxicola	infundibulum		species
	imerss.org:PMLS:15053			Count: some		Andy Lamb								PRESENT				Serpula columbiana					iNaturalist:131207								Serpula columbiana							Animalia	Annelida	Polychaeta	Sabellida	Serpulidae	Serpula	columbiana		species		Johnson, 1901
	imerss.org:PMLS:15054			Count: very many		Andy Lamb								PRESENT				Dodecaceria fewkesi					iNaturalist:192656								Dodecaceria fewkesi							Animalia	Annelida	Polychaeta	Terebellida	Cirratulidae	Dodecaceria	fewkesi		species		Berkeley & Berkeley, 1954
	imerss.org:PMLS:15055					Andy Lamb		3						PRESENT				Eudistylia vancouveri					iNaturalist:84864								Eudistylia vancouveri							Animalia	Annelida	Polychaeta	Sabellida	Sabellidae	Eudistylia	vancouveri		species		(Kinberg, 1866)
	imerss.org:PMLS:15056					Andy Lamb		1						PRESENT				Pista elongata					iNaturalist:338339								Pista elongata							Animalia	Annelida	Polychaeta	Terebellida	Terebellidae	Pista	elongata		species		Moore, 1909
	imerss.org:PMLS:15057					Andy Lamb		2						PRESENT				Thelepus spp.					iNaturalist:117588								Thelepus							Animalia	Annelida	Polychaeta	Terebellida	Terebellidae	Thelepus			genus
	imerss.org:PMLS:15161			Count: many		Andy Lamb								PRESENT				Serpula columbiana					iNaturalist:131207								Serpula columbiana							Animalia	Annelida	Polychaeta	Sabellida	Serpulidae	Serpula	columbiana		species		Johnson, 1901
	imerss.org:PMLS:15162			Count: abundant		Andy Lamb								PRESENT				Dodecaceria fewkesi					iNaturalist:192656								Dodecaceria fewkesi							Animalia	Annelida	Polychaeta	Terebellida	Cirratulidae	Dodecaceria	fewkesi		species		Berkeley & Berkeley, 1954
	imerss.org:PMLS:15163			Count: some		Andy Lamb								PRESENT				Eudistylia vancouveri					iNaturalist:84864								Eudistylia vancouveri							Animalia	Annelida	Polychaeta	Sabellida	Sabellidae	Eudistylia	vancouveri		species		(Kinberg, 1866)
	imerss.org:PMLS:15164			Count: few		Andy Lamb								PRESENT				Schizobranchia insignis					iNaturalist:339561								Schizobranchia insignis							Animalia	Annelida	Polychaeta	Sabellida	Sabellidae	Schizobranchia	insignis		species		Bush, 1905
	imerss.org:PMLS:15165			Count: some		Andy Lamb								PRESENT				Pista elongata					iNaturalist:338339								Pista elongata							Animalia	Annelida	Polychaeta	Terebellida	Terebellidae	Pista	elongata		species		Moore, 1909
	imerss.org:PMLS:15258					Andy Lamb		2						PRESENT				Protula pacifica					iNaturalist:538108								Protula pacifica							Animalia	Annelida	Polychaeta	Sabellida	Serpulidae	Protula	pacifica		species		Pixell, 1912
	imerss.org:PMLS:15259			Count: few		Andy Lamb								PRESENT				Serpula columbiana					iNaturalist:131207								Serpula columbiana							Animalia	Annelida	Polychaeta	Sabellida	Serpulidae	Serpula	columbiana		species		Johnson, 1901
	imerss.org:PMLS:15260			Count: very many		Andy Lamb								PRESENT				Dodecaceria fewkesi					iNaturalist:192656								Dodecaceria fewkesi							Animalia	Annelida	Polychaeta	Terebellida	Cirratulidae	Dodecaceria	fewkesi		species		Berkeley & Berkeley, 1954
	imerss.org:PMLS:15261			Count: some		Andy Lamb								PRESENT				Myxicola sp.B					iNaturalist:49533								Myxicola infundibulum							Animalia	Annelida	Polychaeta	Sabellida	Sabellidae	Myxicola	infundibulum		species
	imerss.org:PMLS:15262					Andy Lamb		2						PRESENT				Thelepus spp.					iNaturalist:117588								Thelepus							Animalia	Annelida	Polychaeta	Terebellida	Terebellidae	Thelepus			genus
	imerss.org:PMLS:15353			Count: few		Andy Lamb								PRESENT				Arctonoe fragilis					iNaturalist:69914								Arctonoe fragilis							Animalia	Annelida	Polychaeta	Phyllodocida	Polynoidae	Arctonoe	fragilis		species		(Baird, 1863)
	imerss.org:PMLS:15354					Andy Lamb		1						PRESENT				Arctonoe pulchra					iNaturalist:465156								Arctonoe pulchra							Animalia	Annelida	Polychaeta	Phyllodocida	Polynoidae	Arctonoe	pulchra		species		(Johnson, 1897)
	imerss.org:PMLS:15355			Count: some		Andy Lamb								PRESENT				Serpula columbiana					iNaturalist:131207								Serpula columbiana							Animalia	Annelida	Polychaeta	Sabellida	Serpulidae	Serpula	columbiana		species		Johnson, 1901
	imerss.org:PMLS:15356			Count: abundant		Andy Lamb								PRESENT				Dodecaceria fewkesi					iNaturalist:192656								Dodecaceria fewkesi							Animalia	Annelida	Polychaeta	Terebellida	Cirratulidae	Dodecaceria	fewkesi		species		Berkeley & Berkeley, 1954
	imerss.org:PMLS:15357			Count: some		Andy Lamb								PRESENT				Myxicola sp.B					iNaturalist:49533								Myxicola infundibulum							Animalia	Annelida	Polychaeta	Sabellida	Sabellidae	Myxicola	infundibulum		species
	imerss.org:PMLS:15358					Andy Lamb		2						PRESENT				Pista elongata					iNaturalist:338339								Pista elongata							Animalia	Annelida	Polychaeta	Terebellida	Terebellidae	Pista	elongata		species		Moore, 1909
	imerss.org:PMLS:15472					Andy Lamb		1						PRESENT				Harmothoe fragilis					iNaturalist:873903								Harmothoe fragilis							Animalia	Annelida	Polychaeta	Phyllodocida	Polynoidae	Harmothoe	fragilis		species		Moore, 1910
	imerss.org:PMLS:15473			Count: few		Andy Lamb								PRESENT				Serpula columbiana					iNaturalist:131207								Serpula columbiana							Animalia	Annelida	Polychaeta	Sabellida	Serpulidae	Serpula	columbiana		species		Johnson, 1901
	imerss.org:PMLS:15474			Count: very abundant		Andy Lamb								PRESENT				Dodecaceria fewkesi					iNaturalist:192656								Dodecaceria fewkesi							Animalia	Annelida	Polychaeta	Terebellida	Cirratulidae	Dodecaceria	fewkesi		species		Berkeley & Berkeley, 1954
	imerss.org:PMLS:15475			Count: some		Andy Lamb								PRESENT				Eudistylia vancouveri					iNaturalist:84864								Eudistylia vancouveri							Animalia	Annelida	Polychaeta	Sabellida	Sabellidae	Eudistylia	vancouveri		species		(Kinberg, 1866)
	imerss.org:PMLS:15476					Andy Lamb		1						PRESENT				Pista elongata					iNaturalist:338339								Pista elongata							Animalia	Annelida	Polychaeta	Terebellida	Terebellidae	Pista	elongata		species		Moore, 1909
	imerss.org:PMLS:15584			Count: few		Andy Lamb								PRESENT				Serpula columbiana					iNaturalist:131207								Serpula columbiana							Animalia	Annelida	Polychaeta	Sabellida	Serpulidae	Serpula	columbiana		species		Johnson, 1901
	imerss.org:PMLS:15585			Count: some		Andy Lamb								PRESENT				Pileolaria spp.					iNaturalist:533325								Pileolaria							Animalia	Annelida	Polychaeta	Sabellida	Serpulidae	Pileolaria			genus
	imerss.org:PMLS:15586			Count: very many		Andy Lamb								PRESENT				Dodecaceria fewkesi					iNaturalist:192656								Dodecaceria fewkesi							Animalia	Annelida	Polychaeta	Terebellida	Cirratulidae	Dodecaceria	fewkesi		species		Berkeley & Berkeley, 1954
	imerss.org:PMLS:15587			Count: few		Andy Lamb								PRESENT				Thelepus spp.					iNaturalist:117588								Thelepus							Animalia	Annelida	Polychaeta	Terebellida	Terebellidae	Thelepus			genus
	imerss.org:PMLS:15701			Count: very many		Andy Lamb								PRESENT				Serpula columbiana					iNaturalist:131207								Serpula columbiana							Animalia	Annelida	Polychaeta	Sabellida	Serpulidae	Serpula	columbiana		species		Johnson, 1901
	imerss.org:PMLS:15702			Count: abundant		Andy Lamb								PRESENT				Dodecaceria fewkesi					iNaturalist:192656								Dodecaceria fewkesi							Animalia	Annelida	Polychaeta	Terebellida	Cirratulidae	Dodecaceria	fewkesi		species		Berkeley & Berkeley, 1954
	imerss.org:PMLS:15703			Count: few		Andy Lamb								PRESENT				Eudistylia vancouveri					iNaturalist:84864								Eudistylia vancouveri							Animalia	Annelida	Polychaeta	Sabellida	Sabellidae	Eudistylia	vancouveri		species		(Kinberg, 1866)
	imerss.org:PMLS:15704			Count: few		Andy Lamb								PRESENT				Myxicola sp.B					iNaturalist:49533								Myxicola infundibulum							Animalia	Annelida	Polychaeta	Sabellida	Sabellidae	Myxicola	infundibulum		species
	imerss.org:PMLS:15806					Andy Lamb		2						PRESENT				Arctonoe fragilis					iNaturalist:69914								Arctonoe fragilis							Animalia	Annelida	Polychaeta	Phyllodocida	Polynoidae	Arctonoe	fragilis		species		(Baird, 1863)
	imerss.org:PMLS:15807			Count: few		Andy Lamb								PRESENT				Arctonoe pulchra					iNaturalist:465156								Arctonoe pulchra							Animalia	Annelida	Polychaeta	Phyllodocida	Polynoidae	Arctonoe	pulchra		species		(Johnson, 1897)
	imerss.org:PMLS:15808			Count: many		Andy Lamb								PRESENT				Serpula columbiana					iNaturalist:131207								Serpula columbiana							Animalia	Annelida	Polychaeta	Sabellida	Serpulidae	Serpula	columbiana		species		Johnson, 1901
	imerss.org:PMLS:15809			Count: some		Andy Lamb								PRESENT				Pileolaria spp.					iNaturalist:533325								Pileolaria							Animalia	Annelida	Polychaeta	Sabellida	Serpulidae	Pileolaria			genus
	imerss.org:PMLS:15810			Count: very abundant		Andy Lamb								PRESENT				Dodecaceria fewkesi					iNaturalist:192656								Dodecaceria fewkesi							Animalia	Annelida	Polychaeta	Terebellida	Cirratulidae	Dodecaceria	fewkesi		species		Berkeley & Berkeley, 1954
	imerss.org:PMLS:15811					Andy Lamb		1						PRESENT				Parasabella media					iNaturalist:367054								Parasabella media							Animalia	Annelida	Polychaeta	Sabellida	Sabellidae	Parasabella	media		species		Bush, 1905
	imerss.org:PMLS:15812			Count: few		Andy Lamb								PRESENT				Eudistylia vancouveri					iNaturalist:84864								Eudistylia vancouveri							Animalia	Annelida	Polychaeta	Sabellida	Sabellidae	Eudistylia	vancouveri		species		(Kinberg, 1866)
	imerss.org:PMLS:15813			Count: few		Andy Lamb								PRESENT				Myxicola sp.B					iNaturalist:49533								Myxicola infundibulum							Animalia	Annelida	Polychaeta	Sabellida	Sabellidae	Myxicola	infundibulum		species
	imerss.org:PMLS:15814			Count: few		Andy Lamb								PRESENT				Thelepus spp.					iNaturalist:117588								Thelepus							Animalia	Annelida	Polychaeta	Terebellida	Terebellidae	Thelepus			genus
	imerss.org:PMLS:15927					Andy Lamb		1						PRESENT				Arctonoe fragilis					iNaturalist:69914								Arctonoe fragilis							Animalia	Annelida	Polychaeta	Phyllodocida	Polynoidae	Arctonoe	fragilis		species		(Baird, 1863)
	imerss.org:PMLS:15928					Andy Lamb		2						PRESENT				Arctonoe pulchra					iNaturalist:465156								Arctonoe pulchra							Animalia	Annelida	Polychaeta	Phyllodocida	Polynoidae	Arctonoe	pulchra		species		(Johnson, 1897)
	imerss.org:PMLS:15929					Andy Lamb		1						PRESENT				Nereis spp.					iNaturalist:81791								Nereis							Animalia	Annelida	Polychaeta	Phyllodocida	Nereididae	Nereis			genus
	imerss.org:PMLS:15930					Andy Lamb		1						PRESENT				Protula pacifica					iNaturalist:538108								Protula pacifica							Animalia	Annelida	Polychaeta	Sabellida	Serpulidae	Protula	pacifica		species		Pixell, 1912
	imerss.org:PMLS:15931			Count: some		Andy Lamb								PRESENT				Serpula columbiana					iNaturalist:131207								Serpula columbiana							Animalia	Annelida	Polychaeta	Sabellida	Serpulidae	Serpula	columbiana		species		Johnson, 1901
	imerss.org:PMLS:15932			Count: abundant		Andy Lamb								PRESENT				Dodecaceria fewkesi					iNaturalist:192656								Dodecaceria fewkesi							Animalia	Annelida	Polychaeta	Terebellida	Cirratulidae	Dodecaceria	fewkesi		species		Berkeley & Berkeley, 1954
	imerss.org:PMLS:15933					Andy Lamb		3						PRESENT				Eudistylia vancouveri					iNaturalist:84864								Eudistylia vancouveri							Animalia	Annelida	Polychaeta	Sabellida	Sabellidae	Eudistylia	vancouveri		species		(Kinberg, 1866)
	imerss.org:PMLS:15934					Andy Lamb		2						PRESENT				Myxicola sp.B					iNaturalist:49533								Myxicola infundibulum							Animalia	Annelida	Polychaeta	Sabellida	Sabellidae	Myxicola	infundibulum		species
	imerss.org:PMLS:15935			Count: few		Andy Lamb								PRESENT				Pista elongata					iNaturalist:338339								Pista elongata							Animalia	Annelida	Polychaeta	Terebellida	Terebellidae	Pista	elongata		species		Moore, 1909
	imerss.org:PMLS:15936			Count: few		Andy Lamb								PRESENT				Thelepus spp.					iNaturalist:117588								Thelepus							Animalia	Annelida	Polychaeta	Terebellida	Terebellidae	Thelepus			genus
	imerss.org:PMLS:16046					Andy Lamb		1						PRESENT				Arctonoe fragilis					iNaturalist:69914								Arctonoe fragilis							Animalia	Annelida	Polychaeta	Phyllodocida	Polynoidae	Arctonoe	fragilis		species		(Baird, 1863)
	imerss.org:PMLS:16047			Count: few		Andy Lamb								PRESENT				Arctonoe pulchra					iNaturalist:465156								Arctonoe pulchra							Animalia	Annelida	Polychaeta	Phyllodocida	Polynoidae	Arctonoe	pulchra		species		(Johnson, 1897)
	imerss.org:PMLS:16048			Count: few		Andy Lamb								PRESENT				Protula pacifica					iNaturalist:538108								Protula pacifica							Animalia	Annelida	Polychaeta	Sabellida	Serpulidae	Protula	pacifica		species		Pixell, 1912
	imerss.org:PMLS:16049			Count: some		Andy Lamb								PRESENT				Serpula columbiana					iNaturalist:131207								Serpula columbiana							Animalia	Annelida	Polychaeta	Sabellida	Serpulidae	Serpula	columbiana		species		Johnson, 1901
	imerss.org:PMLS:16050			Count: abundant		Andy Lamb								PRESENT				Dodecaceria fewkesi					iNaturalist:192656								Dodecaceria fewkesi							Animalia	Annelida	Polychaeta	Terebellida	Cirratulidae	Dodecaceria	fewkesi		species		Berkeley & Berkeley, 1954
	imerss.org:PMLS:16051			Count: few		Andy Lamb								PRESENT				Schizobranchia insignis					iNaturalist:339561								Schizobranchia insignis							Animalia	Annelida	Polychaeta	Sabellida	Sabellidae	Schizobranchia	insignis		species		Bush, 1905
	imerss.org:PMLS:16052			Count: some		Andy Lamb								PRESENT				Myxicola sp.B					iNaturalist:49533								Myxicola infundibulum							Animalia	Annelida	Polychaeta	Sabellida	Sabellidae	Myxicola	infundibulum		species
	imerss.org:PMLS:16147			Count: few		Andy Lamb								PRESENT				Diopatra ornata					iNaturalist:339286								Diopatra ornata							Animalia	Annelida	Polychaeta	Eunicida	Onuphidae	Diopatra	ornata		species		Moore, 1911
	imerss.org:PMLS:16148			Count: some		Andy Lamb								PRESENT				Serpula columbiana					iNaturalist:131207								Serpula columbiana							Animalia	Annelida	Polychaeta	Sabellida	Serpulidae	Serpula	columbiana		species		Johnson, 1901
	imerss.org:PMLS:16149			Count: some		Andy Lamb								PRESENT				Dodecaceria fewkesi					iNaturalist:192656								Dodecaceria fewkesi							Animalia	Annelida	Polychaeta	Terebellida	Cirratulidae	Dodecaceria	fewkesi		species		Berkeley & Berkeley, 1954
	imerss.org:PMLS:16150			Count: some		Andy Lamb								PRESENT				Chone aurantiaca					iNaturalist:356415								Chone aurantiaca							Animalia	Annelida	Polychaeta	Sabellida	Sabellidae	Chone	aurantiaca		species		(Johnson, 1901)
	imerss.org:PMLS:16151			Count: few		Andy Lamb								PRESENT				Myxicola sp.B					iNaturalist:49533								Myxicola infundibulum							Animalia	Annelida	Polychaeta	Sabellida	Sabellidae	Myxicola	infundibulum		species
	imerss.org:PMLS:16229			Count: few		Andy Lamb								PRESENT				Arctonoe pulchra					iNaturalist:465156								Arctonoe pulchra							Animalia	Annelida	Polychaeta	Phyllodocida	Polynoidae	Arctonoe	pulchra		species		(Johnson, 1897)
	imerss.org:PMLS:16230			Count: some		Andy Lamb								PRESENT				Dodecaceria fewkesi					iNaturalist:192656								Dodecaceria fewkesi							Animalia	Annelida	Polychaeta	Terebellida	Cirratulidae	Dodecaceria	fewkesi		species		Berkeley & Berkeley, 1954
	imerss.org:PMLS:16231			Count: many		Andy Lamb								PRESENT				Chone aurantiaca					iNaturalist:356415								Chone aurantiaca							Animalia	Annelida	Polychaeta	Sabellida	Sabellidae	Chone	aurantiaca		species		(Johnson, 1901)
	imerss.org:PMLS:16232			Count: abundant		Andy Lamb								PRESENT				Myxicola sp.B					iNaturalist:49533								Myxicola infundibulum							Animalia	Annelida	Polychaeta	Sabellida	Sabellidae	Myxicola	infundibulum		species
	imerss.org:PMLS:16317			Count: few		Andy Lamb								PRESENT				Arctonoe pulchra					iNaturalist:465156								Arctonoe pulchra							Animalia	Annelida	Polychaeta	Phyllodocida	Polynoidae	Arctonoe	pulchra		species		(Johnson, 1897)
	imerss.org:PMLS:16318			Count: abundant		Andy Lamb								PRESENT				Chone aurantiaca					iNaturalist:356415								Chone aurantiaca							Animalia	Annelida	Polychaeta	Sabellida	Sabellidae	Chone	aurantiaca		species		(Johnson, 1901)
	imerss.org:PMLS:16319			Count: few		Andy Lamb								PRESENT				Schizobranchia insignis					iNaturalist:339561								Schizobranchia insignis							Animalia	Annelida	Polychaeta	Sabellida	Sabellidae	Schizobranchia	insignis		species		Bush, 1905
	imerss.org:PMLS:16320			Count: abundant		Andy Lamb								PRESENT				Myxicola sp.B					iNaturalist:49533								Myxicola infundibulum							Animalia	Annelida	Polychaeta	Sabellida	Sabellidae	Myxicola	infundibulum		species
	imerss.org:PMLS:16321			Count: few		Andy Lamb								PRESENT				Bispira pacifica					iNaturalist:1199401								Bispira pacifica							Animalia	Annelida	Polychaeta	Sabellida	Sabellidae	Bispira	pacifica		species		(Berkeley & Berkeley, 1954)
	imerss.org:PMLS:16398			Count: few		Andy Lamb								PRESENT				Arctonoe fragilis					iNaturalist:69914								Arctonoe fragilis							Animalia	Annelida	Polychaeta	Phyllodocida	Polynoidae	Arctonoe	fragilis		species		(Baird, 1863)
	imerss.org:PMLS:16399			Count: few		Andy Lamb								PRESENT				Arctonoe pulchra					iNaturalist:465156								Arctonoe pulchra							Animalia	Annelida	Polychaeta	Phyllodocida	Polynoidae	Arctonoe	pulchra		species		(Johnson, 1897)
	imerss.org:PMLS:16400			Count: some		Andy Lamb								PRESENT				Serpula columbiana					iNaturalist:131207								Serpula columbiana							Animalia	Annelida	Polychaeta	Sabellida	Serpulidae	Serpula	columbiana		species		Johnson, 1901
	imerss.org:PMLS:16401			Count: very many		Andy Lamb								PRESENT				Dodecaceria fewkesi					iNaturalist:192656								Dodecaceria fewkesi							Animalia	Annelida	Polychaeta	Terebellida	Cirratulidae	Dodecaceria	fewkesi		species		Berkeley & Berkeley, 1954
	imerss.org:PMLS:16402			Count: some		Andy Lamb								PRESENT				Chone aurantiaca					iNaturalist:356415								Chone aurantiaca							Animalia	Annelida	Polychaeta	Sabellida	Sabellidae	Chone	aurantiaca		species		(Johnson, 1901)
	imerss.org:PMLS:16403					Andy Lamb		2						PRESENT				Eudistylia vancouveri					iNaturalist:84864								Eudistylia vancouveri							Animalia	Annelida	Polychaeta	Sabellida	Sabellidae	Eudistylia	vancouveri		species		(Kinberg, 1866)
	imerss.org:PMLS:16404			Count: very many		Andy Lamb								PRESENT				Myxicola sp.B					iNaturalist:49533								Myxicola infundibulum							Animalia	Annelida	Polychaeta	Sabellida	Sabellidae	Myxicola	infundibulum		species
	imerss.org:PMLS:16489					Andy Lamb		2						PRESENT				Arctonoe fragilis					iNaturalist:69914								Arctonoe fragilis							Animalia	Annelida	Polychaeta	Phyllodocida	Polynoidae	Arctonoe	fragilis		species		(Baird, 1863)
	imerss.org:PMLS:16490			Count: few		Andy Lamb								PRESENT				Arctonoe pulchra					iNaturalist:465156								Arctonoe pulchra							Animalia	Annelida	Polychaeta	Phyllodocida	Polynoidae	Arctonoe	pulchra		species		(Johnson, 1897)
	imerss.org:PMLS:16491			Count: few		Andy Lamb								PRESENT				Serpula columbiana					iNaturalist:131207								Serpula columbiana							Animalia	Annelida	Polychaeta	Sabellida	Serpulidae	Serpula	columbiana		species		Johnson, 1901
	imerss.org:PMLS:16492					Andy Lamb		2						PRESENT				Dodecaceria concharum					iNaturalist:464813								Dodecaceria concharum							Animalia	Annelida	Polychaeta	Terebellida	Cirratulidae	Dodecaceria	concharum		species		Örsted, 1843
	imerss.org:PMLS:16493			Count: some		Andy Lamb								PRESENT				Dodecaceria fewkesi					iNaturalist:192656								Dodecaceria fewkesi							Animalia	Annelida	Polychaeta	Terebellida	Cirratulidae	Dodecaceria	fewkesi		species		Berkeley & Berkeley, 1954
	imerss.org:PMLS:16494			Count: some		Andy Lamb								PRESENT				Chone aurantiaca					iNaturalist:356415								Chone aurantiaca							Animalia	Annelida	Polychaeta	Sabellida	Sabellidae	Chone	aurantiaca		species		(Johnson, 1901)
	imerss.org:PMLS:16495					Andy Lamb		2						PRESENT				Eudistylia vancouveri					iNaturalist:84864								Eudistylia vancouveri							Animalia	Annelida	Polychaeta	Sabellida	Sabellidae	Eudistylia	vancouveri		species		(Kinberg, 1866)
	imerss.org:PMLS:16496			Count: very many		Andy Lamb								PRESENT				Myxicola sp.B					iNaturalist:49533								Myxicola infundibulum							Animalia	Annelida	Polychaeta	Sabellida	Sabellidae	Myxicola	infundibulum		species
	imerss.org:PMLS:16497					Andy Lamb		2						PRESENT				Bispira pacifica					iNaturalist:1199401								Bispira pacifica							Animalia	Annelida	Polychaeta	Sabellida	Sabellidae	Bispira	pacifica		species		(Berkeley & Berkeley, 1954)
	imerss.org:PMLS:16592			Count: some		Andy Lamb								PRESENT				Serpula columbiana					iNaturalist:131207								Serpula columbiana							Animalia	Annelida	Polychaeta	Sabellida	Serpulidae	Serpula	columbiana		species		Johnson, 1901
	imerss.org:PMLS:16593			Count: many		Andy Lamb								PRESENT				Dodecaceria fewkesi					iNaturalist:192656								Dodecaceria fewkesi							Animalia	Annelida	Polychaeta	Terebellida	Cirratulidae	Dodecaceria	fewkesi		species		Berkeley & Berkeley, 1954
	imerss.org:PMLS:16594			Count: some		Andy Lamb								PRESENT				Myxicola sp.B					iNaturalist:49533								Myxicola infundibulum							Animalia	Annelida	Polychaeta	Sabellida	Sabellidae	Myxicola	infundibulum		species
	imerss.org:PMLS:16595					Andy Lamb		2						PRESENT				Bispira pacifica					iNaturalist:1199401								Bispira pacifica							Animalia	Annelida	Polychaeta	Sabellida	Sabellidae	Bispira	pacifica		species		(Berkeley & Berkeley, 1954)
	imerss.org:PMLS:16677			Count: few		Andy Lamb								PRESENT				Serpula columbiana					iNaturalist:131207								Serpula columbiana							Animalia	Annelida	Polychaeta	Sabellida	Serpulidae	Serpula	columbiana		species		Johnson, 1901
	imerss.org:PMLS:16678			Count: very abundant		Andy Lamb								PRESENT				Dodecaceria fewkesi					iNaturalist:192656								Dodecaceria fewkesi							Animalia	Annelida	Polychaeta	Terebellida	Cirratulidae	Dodecaceria	fewkesi		species		Berkeley & Berkeley, 1954
	imerss.org:PMLS:16679			Count: some		Andy Lamb								PRESENT				Eudistylia vancouveri					iNaturalist:84864								Eudistylia vancouveri							Animalia	Annelida	Polychaeta	Sabellida	Sabellidae	Eudistylia	vancouveri		species		(Kinberg, 1866)
	imerss.org:PMLS:16680					Andy Lamb		1						PRESENT				Myxicola sp.B					iNaturalist:49533								Myxicola infundibulum							Animalia	Annelida	Polychaeta	Sabellida	Sabellidae	Myxicola	infundibulum		species
	imerss.org:PMLS:16681			Count: some		Andy Lamb								PRESENT				Pista elongata					iNaturalist:338339								Pista elongata							Animalia	Annelida	Polychaeta	Terebellida	Terebellidae	Pista	elongata		species		Moore, 1909
	imerss.org:PMLS:16747			Count: some		Andy Lamb								PRESENT				Serpula columbiana					iNaturalist:131207								Serpula columbiana							Animalia	Annelida	Polychaeta	Sabellida	Serpulidae	Serpula	columbiana		species		Johnson, 1901
	imerss.org:PMLS:16748			Count: very many		Andy Lamb								PRESENT				Dodecaceria fewkesi					iNaturalist:192656								Dodecaceria fewkesi							Animalia	Annelida	Polychaeta	Terebellida	Cirratulidae	Dodecaceria	fewkesi		species		Berkeley & Berkeley, 1954
	imerss.org:PMLS:16809			Count: few		Andy Lamb								PRESENT				Diopatra ornata					iNaturalist:339286								Diopatra ornata							Animalia	Annelida	Polychaeta	Eunicida	Onuphidae	Diopatra	ornata		species		Moore, 1911
	imerss.org:PMLS:16810					Andy Lamb		1						PRESENT				Arctonoe pulchra					iNaturalist:465156								Arctonoe pulchra							Animalia	Annelida	Polychaeta	Phyllodocida	Polynoidae	Arctonoe	pulchra		species		(Johnson, 1897)
	imerss.org:PMLS:16811			Count: few		Andy Lamb								PRESENT				Serpula columbiana					iNaturalist:131207								Serpula columbiana							Animalia	Annelida	Polychaeta	Sabellida	Serpulidae	Serpula	columbiana		species		Johnson, 1901
	imerss.org:PMLS:16812			Count: abundant		Andy Lamb								PRESENT				Dodecaceria fewkesi					iNaturalist:192656								Dodecaceria fewkesi							Animalia	Annelida	Polychaeta	Terebellida	Cirratulidae	Dodecaceria	fewkesi		species		Berkeley & Berkeley, 1954
	imerss.org:PMLS:16813			Count: some		Andy Lamb								PRESENT				Myxicola sp.B					iNaturalist:49533								Myxicola infundibulum							Animalia	Annelida	Polychaeta	Sabellida	Sabellidae	Myxicola	infundibulum		species
	imerss.org:PMLS:16814					Andy Lamb		2						PRESENT				Bispira pacifica					iNaturalist:1199401								Bispira pacifica							Animalia	Annelida	Polychaeta	Sabellida	Sabellidae	Bispira	pacifica		species		(Berkeley & Berkeley, 1954)
	imerss.org:PMLS:16910					Andy Lamb		3						PRESENT				Diopatra ornata					iNaturalist:339286								Diopatra ornata							Animalia	Annelida	Polychaeta	Eunicida	Onuphidae	Diopatra	ornata		species		Moore, 1911
	imerss.org:PMLS:16911					Andy Lamb		2						PRESENT				Protula pacifica					iNaturalist:538108								Protula pacifica							Animalia	Annelida	Polychaeta	Sabellida	Serpulidae	Protula	pacifica		species		Pixell, 1912
	imerss.org:PMLS:16912			Count: some		Andy Lamb								PRESENT				Serpula columbiana					iNaturalist:131207								Serpula columbiana							Animalia	Annelida	Polychaeta	Sabellida	Serpulidae	Serpula	columbiana		species		Johnson, 1901
	imerss.org:PMLS:16913			Count: abundant		Andy Lamb								PRESENT				Dodecaceria fewkesi					iNaturalist:192656								Dodecaceria fewkesi							Animalia	Annelida	Polychaeta	Terebellida	Cirratulidae	Dodecaceria	fewkesi		species		Berkeley & Berkeley, 1954
	imerss.org:PMLS:16914					Andy Lamb		2						PRESENT				Myxicola sp.B					iNaturalist:49533								Myxicola infundibulum							Animalia	Annelida	Polychaeta	Sabellida	Sabellidae	Myxicola	infundibulum		species
	imerss.org:PMLS:17006			Count: abundant		Andy Lamb								PRESENT				Myxicola sp.B					iNaturalist:49533								Myxicola infundibulum							Animalia	Annelida	Polychaeta	Sabellida	Sabellidae	Myxicola	infundibulum		species
	imerss.org:PMLS:17007					Andy Lamb		1						PRESENT				Bispira pacifica					iNaturalist:1199401								Bispira pacifica							Animalia	Annelida	Polychaeta	Sabellida	Sabellidae	Bispira	pacifica		species		(Berkeley & Berkeley, 1954)
	imerss.org:PMLS:17054			Count: some		Andy Lamb								PRESENT				Serpula columbiana					iNaturalist:131207								Serpula columbiana							Animalia	Annelida	Polychaeta	Sabellida	Serpulidae	Serpula	columbiana		species		Johnson, 1901
	imerss.org:PMLS:17055			Count: some		Andy Lamb								PRESENT				Dodecaceria fewkesi					iNaturalist:192656								Dodecaceria fewkesi							Animalia	Annelida	Polychaeta	Terebellida	Cirratulidae	Dodecaceria	fewkesi		species		Berkeley & Berkeley, 1954
	imerss.org:PMLS:17056					Andy Lamb		2						PRESENT				Pista elongata					iNaturalist:338339								Pista elongata							Animalia	Annelida	Polychaeta	Terebellida	Terebellidae	Pista	elongata		species		Moore, 1909
	imerss.org:PMLS:17107			Count: some		Andy Lamb								PRESENT				Serpula columbiana					iNaturalist:131207								Serpula columbiana							Animalia	Annelida	Polychaeta	Sabellida	Serpulidae	Serpula	columbiana		species		Johnson, 1901
	imerss.org:PMLS:17108			Count: abundant		Andy Lamb								PRESENT				Dodecaceria fewkesi					iNaturalist:192656								Dodecaceria fewkesi							Animalia	Annelida	Polychaeta	Terebellida	Cirratulidae	Dodecaceria	fewkesi		species		Berkeley & Berkeley, 1954
	imerss.org:PMLS:17109			Count: some		Andy Lamb								PRESENT				Myxicola sp.B					iNaturalist:49533								Myxicola infundibulum							Animalia	Annelida	Polychaeta	Sabellida	Sabellidae	Myxicola	infundibulum		species
	imerss.org:PMLS:17110			Count: few		Andy Lamb								PRESENT				Pista elongata					iNaturalist:338339								Pista elongata							Animalia	Annelida	Polychaeta	Terebellida	Terebellidae	Pista	elongata		species		Moore, 1909
	imerss.org:PMLS:17191			Count: some		Andy Lamb								PRESENT				Serpula columbiana					iNaturalist:131207								Serpula columbiana							Animalia	Annelida	Polychaeta	Sabellida	Serpulidae	Serpula	columbiana		species		Johnson, 1901
	imerss.org:PMLS:17192			Count: very many		Andy Lamb								PRESENT				Dodecaceria fewkesi					iNaturalist:192656								Dodecaceria fewkesi							Animalia	Annelida	Polychaeta	Terebellida	Cirratulidae	Dodecaceria	fewkesi		species		Berkeley & Berkeley, 1954
	imerss.org:PMLS:17193			Count: very many		Andy Lamb								PRESENT				Myxicola sp.B					iNaturalist:49533								Myxicola infundibulum							Animalia	Annelida	Polychaeta	Sabellida	Sabellidae	Myxicola	infundibulum		species
	imerss.org:PMLS:17194					Andy Lamb		1						PRESENT				Pista elongata					iNaturalist:338339								Pista elongata							Animalia	Annelida	Polychaeta	Terebellida	Terebellidae	Pista	elongata		species		Moore, 1909
	imerss.org:PMLS:17291			Count: abundant		Andy Lamb								PRESENT				Serpula columbiana					iNaturalist:131207								Serpula columbiana							Animalia	Annelida	Polychaeta	Sabellida	Serpulidae	Serpula	columbiana		species		Johnson, 1901
	imerss.org:PMLS:17292			Count: very many		Andy Lamb								PRESENT				Dodecaceria fewkesi					iNaturalist:192656								Dodecaceria fewkesi							Animalia	Annelida	Polychaeta	Terebellida	Cirratulidae	Dodecaceria	fewkesi		species		Berkeley & Berkeley, 1954
	imerss.org:PMLS:17293			Count: few		Andy Lamb								PRESENT				Parasabella media					iNaturalist:367054								Parasabella media							Animalia	Annelida	Polychaeta	Sabellida	Sabellidae	Parasabella	media		species		Bush, 1905
	imerss.org:PMLS:17294			Count: some		Andy Lamb								PRESENT				Eudistylia vancouveri					iNaturalist:84864								Eudistylia vancouveri							Animalia	Annelida	Polychaeta	Sabellida	Sabellidae	Eudistylia	vancouveri		species		(Kinberg, 1866)
	imerss.org:PMLS:17295			Count: few		Andy Lamb								PRESENT				Schizobranchia insignis					iNaturalist:339561								Schizobranchia insignis							Animalia	Annelida	Polychaeta	Sabellida	Sabellidae	Schizobranchia	insignis		species		Bush, 1905
	imerss.org:PMLS:17296			Count: some		Andy Lamb								PRESENT				Pista elongata					iNaturalist:338339								Pista elongata							Animalia	Annelida	Polychaeta	Terebellida	Terebellidae	Pista	elongata		species		Moore, 1909
	imerss.org:PMLS:17297			Count: some		Andy Lamb								PRESENT				Thelepus spp.					iNaturalist:117588								Thelepus							Animalia	Annelida	Polychaeta	Terebellida	Terebellidae	Thelepus			genus
	imerss.org:PMLS:17298					Andy Lamb		1						PRESENT				Phyllochaetopterus sp.					iNaturalist:374226								Phyllochaetopterus							Animalia	Annelida	Polychaeta		Chaetopteridae	Phyllochaetopterus			genus
	imerss.org:PMLS:17385			Count: many		Andy Lamb								PRESENT				Serpula columbiana					iNaturalist:131207								Serpula columbiana							Animalia	Annelida	Polychaeta	Sabellida	Serpulidae	Serpula	columbiana		species		Johnson, 1901
	imerss.org:PMLS:17386			Count: very abundant		Andy Lamb								PRESENT				Dodecaceria fewkesi					iNaturalist:192656								Dodecaceria fewkesi							Animalia	Annelida	Polychaeta	Terebellida	Cirratulidae	Dodecaceria	fewkesi		species		Berkeley & Berkeley, 1954
	imerss.org:PMLS:17387			Count: few		Andy Lamb								PRESENT				Parasabella media					iNaturalist:367054								Parasabella media							Animalia	Annelida	Polychaeta	Sabellida	Sabellidae	Parasabella	media		species		Bush, 1905
	imerss.org:PMLS:17388			Count: few		Andy Lamb								PRESENT				Eudistylia vancouveri					iNaturalist:84864								Eudistylia vancouveri							Animalia	Annelida	Polychaeta	Sabellida	Sabellidae	Eudistylia	vancouveri		species		(Kinberg, 1866)
	imerss.org:PMLS:17389					Andy Lamb		3						PRESENT				Schizobranchia insignis					iNaturalist:339561								Schizobranchia insignis							Animalia	Annelida	Polychaeta	Sabellida	Sabellidae	Schizobranchia	insignis		species		Bush, 1905
	imerss.org:PMLS:17390			Count: few		Andy Lamb								PRESENT				Myxicola sp.B					iNaturalist:49533								Myxicola infundibulum							Animalia	Annelida	Polychaeta	Sabellida	Sabellidae	Myxicola	infundibulum		species
	imerss.org:PMLS:17391			Count: some		Andy Lamb								PRESENT				Thelepus spp.					iNaturalist:117588								Thelepus							Animalia	Annelida	Polychaeta	Terebellida	Terebellidae	Thelepus			genus
	imerss.org:PMLS:17483			Count: some		Andy Lamb								PRESENT				Serpula columbiana					iNaturalist:131207								Serpula columbiana							Animalia	Annelida	Polychaeta	Sabellida	Serpulidae	Serpula	columbiana		species		Johnson, 1901
	imerss.org:PMLS:17484			Count: abundant		Andy Lamb								PRESENT				Dodecaceria fewkesi					iNaturalist:192656								Dodecaceria fewkesi							Animalia	Annelida	Polychaeta	Terebellida	Cirratulidae	Dodecaceria	fewkesi		species		Berkeley & Berkeley, 1954
	imerss.org:PMLS:17485					Andy Lamb		2						PRESENT				Eudistylia vancouveri					iNaturalist:84864								Eudistylia vancouveri							Animalia	Annelida	Polychaeta	Sabellida	Sabellidae	Eudistylia	vancouveri		species		(Kinberg, 1866)
	imerss.org:PMLS:17486					Andy Lamb		3						PRESENT				Myxicola sp.B					iNaturalist:49533								Myxicola infundibulum							Animalia	Annelida	Polychaeta	Sabellida	Sabellidae	Myxicola	infundibulum		species
	imerss.org:PMLS:17487					Andy Lamb		1						PRESENT				Bispira pacifica					iNaturalist:1199401								Bispira pacifica							Animalia	Annelida	Polychaeta	Sabellida	Sabellidae	Bispira	pacifica		species		(Berkeley & Berkeley, 1954)
	imerss.org:PMLS:17488			Count: some		Andy Lamb								PRESENT				Thelepus spp.					iNaturalist:117588								Thelepus							Animalia	Annelida	Polychaeta	Terebellida	Terebellidae	Thelepus			genus
	imerss.org:PMLS:17591					Andy Lamb		2						PRESENT				Diopatra ornata					iNaturalist:339286								Diopatra ornata							Animalia	Annelida	Polychaeta	Eunicida	Onuphidae	Diopatra	ornata		species		Moore, 1911
	imerss.org:PMLS:17592			Count: some		Andy Lamb								PRESENT				Serpula columbiana					iNaturalist:131207								Serpula columbiana							Animalia	Annelida	Polychaeta	Sabellida	Serpulidae	Serpula	columbiana		species		Johnson, 1901
	imerss.org:PMLS:17593			Count: many		Andy Lamb								PRESENT				Dodecaceria fewkesi					iNaturalist:192656								Dodecaceria fewkesi							Animalia	Annelida	Polychaeta	Terebellida	Cirratulidae	Dodecaceria	fewkesi		species		Berkeley & Berkeley, 1954
	imerss.org:PMLS:17594			Count: some		Andy Lamb								PRESENT				Chone aurantiaca					iNaturalist:356415								Chone aurantiaca							Animalia	Annelida	Polychaeta	Sabellida	Sabellidae	Chone	aurantiaca		species		(Johnson, 1901)
	imerss.org:PMLS:17595					Andy Lamb		2						PRESENT				Parasabella media					iNaturalist:367054								Parasabella media							Animalia	Annelida	Polychaeta	Sabellida	Sabellidae	Parasabella	media		species		Bush, 1905
	imerss.org:PMLS:17596			Count: many		Andy Lamb								PRESENT				Myxicola sp.B					iNaturalist:49533								Myxicola infundibulum							Animalia	Annelida	Polychaeta	Sabellida	Sabellidae	Myxicola	infundibulum		species
	imerss.org:PMLS:17597			Count: some		Andy Lamb								PRESENT				Pista elongata					iNaturalist:338339								Pista elongata							Animalia	Annelida	Polychaeta	Terebellida	Terebellidae	Pista	elongata		species		Moore, 1909
	imerss.org:PMLS:17598			Count: few		Andy Lamb								PRESENT				Thelepus spp.					iNaturalist:117588								Thelepus							Animalia	Annelida	Polychaeta	Terebellida	Terebellidae	Thelepus			genus
	imerss.org:PMLS:17709			Count: some		Andy Lamb								PRESENT				Serpula columbiana					iNaturalist:131207								Serpula columbiana							Animalia	Annelida	Polychaeta	Sabellida	Serpulidae	Serpula	columbiana		species		Johnson, 1901
	imerss.org:PMLS:17710			Count: abundant		Andy Lamb								PRESENT				Dodecaceria fewkesi					iNaturalist:192656								Dodecaceria fewkesi							Animalia	Annelida	Polychaeta	Terebellida	Cirratulidae	Dodecaceria	fewkesi		species		Berkeley & Berkeley, 1954
	imerss.org:PMLS:17785			Count: some		Andy Lamb								PRESENT				Serpula columbiana					iNaturalist:131207								Serpula columbiana							Animalia	Annelida	Polychaeta	Sabellida	Serpulidae	Serpula	columbiana		species		Johnson, 1901
	imerss.org:PMLS:17826			Count: very many		Andy Lamb								PRESENT				Serpula columbiana					iNaturalist:131207								Serpula columbiana							Animalia	Annelida	Polychaeta	Sabellida	Serpulidae	Serpula	columbiana		species		Johnson, 1901
	imerss.org:PMLS:17827			Count: abundant		Andy Lamb								PRESENT				Dodecaceria fewkesi					iNaturalist:192656								Dodecaceria fewkesi							Animalia	Annelida	Polychaeta	Terebellida	Cirratulidae	Dodecaceria	fewkesi		species		Berkeley & Berkeley, 1954
	imerss.org:PMLS:17828			Count: some		Andy Lamb								PRESENT				Myxicola sp.B					iNaturalist:49533								Myxicola infundibulum							Animalia	Annelida	Polychaeta	Sabellida	Sabellidae	Myxicola	infundibulum		species
	imerss.org:PMLS:17829			Count: few		Andy Lamb								PRESENT				Pista elongata					iNaturalist:338339								Pista elongata							Animalia	Annelida	Polychaeta	Terebellida	Terebellidae	Pista	elongata		species		Moore, 1909
	imerss.org:PMLS:17830			Count: some		Andy Lamb								PRESENT				Thelepus spp.					iNaturalist:117588								Thelepus							Animalia	Annelida	Polychaeta	Terebellida	Terebellidae	Thelepus			genus
	imerss.org:PMLS:17831			Count: some		Andy Lamb								PRESENT				Spiochaetopterus costarum pottsi					iNaturalist:130236								Spiochaetopterus costarum							Animalia	Annelida	Polychaeta		Chaetopteridae	Spiochaetopterus	costarum		species		(Claparède, 1869)
	imerss.org:PMLS:17915			Count: few		Andy Lamb								PRESENT				Eudistylia vancouveri					iNaturalist:84864								Eudistylia vancouveri							Animalia	Annelida	Polychaeta	Sabellida	Sabellidae	Eudistylia	vancouveri		species		(Kinberg, 1866)
	imerss.org:PMLS:17975					Andy Lamb		1						PRESENT				Nereis spp.					iNaturalist:81791								Nereis							Animalia	Annelida	Polychaeta	Phyllodocida	Nereididae	Nereis			genus
	imerss.org:PMLS:17976					Andy Lamb		2						PRESENT				Protula pacifica					iNaturalist:538108								Protula pacifica							Animalia	Annelida	Polychaeta	Sabellida	Serpulidae	Protula	pacifica		species		Pixell, 1912
	imerss.org:PMLS:17977			Count: some		Andy Lamb								PRESENT				Serpula columbiana					iNaturalist:131207								Serpula columbiana							Animalia	Annelida	Polychaeta	Sabellida	Serpulidae	Serpula	columbiana		species		Johnson, 1901
	imerss.org:PMLS:17978			Count: abundant		Andy Lamb								PRESENT				Dodecaceria fewkesi					iNaturalist:192656								Dodecaceria fewkesi							Animalia	Annelida	Polychaeta	Terebellida	Cirratulidae	Dodecaceria	fewkesi		species		Berkeley & Berkeley, 1954
	imerss.org:PMLS:17979			Count: some		Andy Lamb								PRESENT				Myxicola sp.B					iNaturalist:49533								Myxicola infundibulum							Animalia	Annelida	Polychaeta	Sabellida	Sabellidae	Myxicola	infundibulum		species
	imerss.org:PMLS:17980					Andy Lamb		2						PRESENT				Pista elongata					iNaturalist:338339								Pista elongata							Animalia	Annelida	Polychaeta	Terebellida	Terebellidae	Pista	elongata		species		Moore, 1909
	imerss.org:PMLS:17981			Count: few		Andy Lamb								PRESENT				Phyllochaetopterus prolifica					iNaturalist:467241								Phyllochaetopterus prolifica							Animalia	Annelida	Polychaeta		Chaetopteridae	Phyllochaetopterus	prolifica		species		Potts, 1914
	imerss.org:PMLS:18054					Andy Lamb		2						PRESENT				Protula pacifica					iNaturalist:538108								Protula pacifica							Animalia	Annelida	Polychaeta	Sabellida	Serpulidae	Protula	pacifica		species		Pixell, 1912
	imerss.org:PMLS:18055			Count: many		Andy Lamb								PRESENT				Serpula columbiana					iNaturalist:131207								Serpula columbiana							Animalia	Annelida	Polychaeta	Sabellida	Serpulidae	Serpula	columbiana		species		Johnson, 1901
	imerss.org:PMLS:18056			Count: some		Andy Lamb								PRESENT				Dodecaceria fewkesi					iNaturalist:192656								Dodecaceria fewkesi							Animalia	Annelida	Polychaeta	Terebellida	Cirratulidae	Dodecaceria	fewkesi		species		Berkeley & Berkeley, 1954
	imerss.org:PMLS:18057			Count: few		Andy Lamb								PRESENT				Myxicola sp.B					iNaturalist:49533								Myxicola infundibulum							Animalia	Annelida	Polychaeta	Sabellida	Sabellidae	Myxicola	infundibulum		species
	imerss.org:PMLS:18140					Andy Lamb		3						PRESENT				Arctonoe pulchra					iNaturalist:465156								Arctonoe pulchra							Animalia	Annelida	Polychaeta	Phyllodocida	Polynoidae	Arctonoe	pulchra		species		(Johnson, 1897)
	imerss.org:PMLS:18141					Andy Lamb		3						PRESENT				Protula pacifica					iNaturalist:538108								Protula pacifica							Animalia	Annelida	Polychaeta	Sabellida	Serpulidae	Protula	pacifica		species		Pixell, 1912
	imerss.org:PMLS:18142			Count: some		Andy Lamb								PRESENT				Serpula columbiana					iNaturalist:131207								Serpula columbiana							Animalia	Annelida	Polychaeta	Sabellida	Serpulidae	Serpula	columbiana		species		Johnson, 1901
	imerss.org:PMLS:18143			Count: very many		Andy Lamb								PRESENT				Crucigera spp.					iNaturalist:543578								Crucigera							Animalia	Annelida	Polychaeta	Sabellida	Serpulidae	Crucigera			genus
	imerss.org:PMLS:18144			Count: very many		Andy Lamb								PRESENT				Dodecaceria fewkesi					iNaturalist:192656								Dodecaceria fewkesi							Animalia	Annelida	Polychaeta	Terebellida	Cirratulidae	Dodecaceria	fewkesi		species		Berkeley & Berkeley, 1954
	imerss.org:PMLS:18145			Count: few		Andy Lamb								PRESENT				Myxicola sp.B					iNaturalist:49533								Myxicola infundibulum							Animalia	Annelida	Polychaeta	Sabellida	Sabellidae	Myxicola	infundibulum		species
	imerss.org:PMLS:18146			Count: few		Andy Lamb								PRESENT				Myxicola sp.A					iNaturalist:492594								Myxicola aesthetica							Animalia	Annelida	Polychaeta	Sabellida	Sabellidae	Myxicola	aesthetica		species
	imerss.org:PMLS:18147			Count: few		Andy Lamb								PRESENT				Pista elongata					iNaturalist:338339								Pista elongata							Animalia	Annelida	Polychaeta	Terebellida	Terebellidae	Pista	elongata		species		Moore, 1909
	imerss.org:PMLS:18148			Count: few		Andy Lamb								PRESENT				Thelepus spp.					iNaturalist:117588								Thelepus							Animalia	Annelida	Polychaeta	Terebellida	Terebellidae	Thelepus			genus
	imerss.org:PMLS:18149			Count: very many		Andy Lamb								PRESENT				Spiochaetopterus costarum pottsi					iNaturalist:130236								Spiochaetopterus costarum							Animalia	Annelida	Polychaeta		Chaetopteridae	Spiochaetopterus	costarum		species		(Claparède, 1869)
	imerss.org:PMLS:18254			Count: many		Andy Lamb								PRESENT				Serpula columbiana					iNaturalist:131207								Serpula columbiana							Animalia	Annelida	Polychaeta	Sabellida	Serpulidae	Serpula	columbiana		species		Johnson, 1901
	imerss.org:PMLS:18255			Count: many		Andy Lamb								PRESENT				Dodecaceria fewkesi					iNaturalist:192656								Dodecaceria fewkesi							Animalia	Annelida	Polychaeta	Terebellida	Cirratulidae	Dodecaceria	fewkesi		species		Berkeley & Berkeley, 1954
	imerss.org:PMLS:18256			Count: few		Andy Lamb								PRESENT				Eudistylia vancouveri					iNaturalist:84864								Eudistylia vancouveri							Animalia	Annelida	Polychaeta	Sabellida	Sabellidae	Eudistylia	vancouveri		species		(Kinberg, 1866)
	imerss.org:PMLS:18257					Andy Lamb		1						PRESENT				Myxicola sp.A					iNaturalist:492594								Myxicola aesthetica							Animalia	Annelida	Polychaeta	Sabellida	Sabellidae	Myxicola	aesthetica		species
	imerss.org:PMLS:18258			Count: some		Andy Lamb								PRESENT				Pista elongata					iNaturalist:338339								Pista elongata							Animalia	Annelida	Polychaeta	Terebellida	Terebellidae	Pista	elongata		species		Moore, 1909
	imerss.org:PMLS:18259					Andy Lamb		1						PRESENT				Thelepus spp.					iNaturalist:117588								Thelepus							Animalia	Annelida	Polychaeta	Terebellida	Terebellidae	Thelepus			genus
	imerss.org:PMLS:18327			Count: few		Andy Lamb								PRESENT				Diopatra ornata					iNaturalist:339286								Diopatra ornata							Animalia	Annelida	Polychaeta	Eunicida	Onuphidae	Diopatra	ornata		species		Moore, 1911
	imerss.org:PMLS:18328			Count: abundant		Andy Lamb								PRESENT				Serpula columbiana					iNaturalist:131207								Serpula columbiana							Animalia	Annelida	Polychaeta	Sabellida	Serpulidae	Serpula	columbiana		species		Johnson, 1901
	imerss.org:PMLS:18329			Count: very abundant		Andy Lamb								PRESENT				Dodecaceria fewkesi					iNaturalist:192656								Dodecaceria fewkesi							Animalia	Annelida	Polychaeta	Terebellida	Cirratulidae	Dodecaceria	fewkesi		species		Berkeley & Berkeley, 1954
	imerss.org:PMLS:18330					Andy Lamb		1						PRESENT				Chone aurantiaca					iNaturalist:356415								Chone aurantiaca							Animalia	Annelida	Polychaeta	Sabellida	Sabellidae	Chone	aurantiaca		species		(Johnson, 1901)
	imerss.org:PMLS:18331			Count: few		Andy Lamb								PRESENT				Eudistylia vancouveri					iNaturalist:84864								Eudistylia vancouveri							Animalia	Annelida	Polychaeta	Sabellida	Sabellidae	Eudistylia	vancouveri		species		(Kinberg, 1866)
	imerss.org:PMLS:18332					Andy Lamb		1						PRESENT				Myxicola sp.B					iNaturalist:49533								Myxicola infundibulum							Animalia	Annelida	Polychaeta	Sabellida	Sabellidae	Myxicola	infundibulum		species
	imerss.org:PMLS:18333			Count: few		Andy Lamb								PRESENT				Pista elongata					iNaturalist:338339								Pista elongata							Animalia	Annelida	Polychaeta	Terebellida	Terebellidae	Pista	elongata		species		Moore, 1909
	imerss.org:PMLS:18334			Count: few		Andy Lamb								PRESENT				Thelepus spp.					iNaturalist:117588								Thelepus							Animalia	Annelida	Polychaeta	Terebellida	Terebellidae	Thelepus			genus
	imerss.org:PMLS:18406			Count: few		Emily Adamczyk								PRESENT				Nereis spp.					iNaturalist:81791								Nereis							Animalia	Annelida	Polychaeta	Phyllodocida	Nereididae	Nereis			genus
	imerss.org:PMLS:18450			Count: very many		Larry Taylor								PRESENT				Dodecaceria fewkesi					iNaturalist:192656								Dodecaceria fewkesi							Animalia	Annelida	Polychaeta	Terebellida	Cirratulidae	Dodecaceria	fewkesi		species		Berkeley & Berkeley, 1954
	imerss.org:PMLS:18474			Count: few		Isabelle Cote								PRESENT				Dodecaceria fewkesi					iNaturalist:192656								Dodecaceria fewkesi							Animalia	Annelida	Polychaeta	Terebellida	Cirratulidae	Dodecaceria	fewkesi		species		Berkeley & Berkeley, 1954
	imerss.org:PMLS:18570					Stefania Gorgopa		1						PRESENT				Serpula columbiana					iNaturalist:131207								Serpula columbiana							Animalia	Annelida	Polychaeta	Sabellida	Serpulidae	Serpula	columbiana		species		Johnson, 1901
	imerss.org:iNat:2763488					Peter								PRESENT				Dodecaceria fewkesi					iNaturalist:192656								Dodecaceria fewkesi							Animalia	Annelida	Polychaeta	Terebellida	Cirratulidae	Dodecaceria	fewkesi		species		Berkeley & Berkeley, 1954
	imerss.org:iNat:2797277					Peter								PRESENT				Eudistylia vancouveri					iNaturalist:84864								Eudistylia vancouveri							Animalia	Annelida	Polychaeta	Sabellida	Sabellidae	Eudistylia	vancouveri		species		(Kinberg, 1866)
	imerss.org:iNat:2854969					Peter								PRESENT				Eudistylia vancouveri					iNaturalist:84864								Eudistylia vancouveri							Animalia	Annelida	Polychaeta	Sabellida	Sabellidae	Eudistylia	vancouveri		species		(Kinberg, 1866)
	imerss.org:iNat:3706037					Karolle Wall								PRESENT				Serpula columbiana					iNaturalist:131207								Serpula columbiana							Animalia	Annelida	Polychaeta	Sabellida	Serpulidae	Serpula	columbiana		species		Johnson, 1901
	imerss.org:iNat:3910071					Andrew Simon								PRESENT				Eudistylia vancouveri					iNaturalist:84864								Eudistylia vancouveri							Animalia	Annelida	Polychaeta	Sabellida	Sabellidae	Eudistylia	vancouveri		species		(Kinberg, 1866)
	imerss.org:iNat:4052030					Karolle Wall								PRESENT				Myxicola					iNaturalist:49534								Myxicola							Animalia	Annelida	Polychaeta	Sabellida	Sabellidae	Myxicola			genus
	imerss.org:iNat:5704172					KK								PRESENT				Serpula columbiana					iNaturalist:131207								Serpula columbiana							Animalia	Annelida	Polychaeta	Sabellida	Serpulidae	Serpula	columbiana		species		Johnson, 1901
	imerss.org:iNat:5796200					Nomadkris								PRESENT				Alitta williami					iNaturalist:1115984								Alitta williami							Animalia	Annelida	Polychaeta	Phyllodocida	Nereididae	Alitta	williami		species		Villalobos-Guerrero & Bakken, 2018
	imerss.org:iNat:6601087					Ayla M								PRESENT				Eudistylia vancouveri					iNaturalist:84864								Eudistylia vancouveri							Animalia	Annelida	Polychaeta	Sabellida	Sabellidae	Eudistylia	vancouveri		species		(Kinberg, 1866)
	imerss.org:iNat:7674351					Karolle Wall								PRESENT				Myxicola					iNaturalist:49534								Myxicola							Animalia	Annelida	Polychaeta	Sabellida	Sabellidae	Myxicola			genus
	imerss.org:iNat:7674363					Karolle Wall								PRESENT				Schizobranchia insignis					iNaturalist:339561								Schizobranchia insignis							Animalia	Annelida	Polychaeta	Sabellida	Sabellidae	Schizobranchia	insignis		species		Bush, 1905
	imerss.org:iNat:7701427					Karolle Wall								PRESENT				Serpula columbiana					iNaturalist:131207								Serpula columbiana							Animalia	Annelida	Polychaeta	Sabellida	Serpulidae	Serpula	columbiana		species		Johnson, 1901
	imerss.org:iNat:10538329					Karolle Wall								PRESENT				Serpula columbiana					iNaturalist:131207								Serpula columbiana							Animalia	Annelida	Polychaeta	Sabellida	Serpulidae	Serpula	columbiana		species		Johnson, 1901
	imerss.org:iNat:15702529					Karolle Wall								PRESENT				Myxicola					iNaturalist:49534								Myxicola							Animalia	Annelida	Polychaeta	Sabellida	Sabellidae	Myxicola			genus
	imerss.org:iNat:15702535					Karolle Wall								PRESENT				Oxydromus pugettensis					iNaturalist:494514								Oxydromus pugettensis							Animalia	Annelida	Polychaeta	Phyllodocida	Hesionidae	Oxydromus	pugettensis		species		(Johnson, 1901)
	imerss.org:iNat:24535513					Norah Brown								PRESENT				Arctonoe pulchra					iNaturalist:465156								Arctonoe pulchra							Animalia	Annelida	Polychaeta	Phyllodocida	Polynoidae	Arctonoe	pulchra		species		(Johnson, 1897)
	imerss.org:iNat:24541323					Norah Brown								PRESENT				Platynereis bicanaliculata					iNaturalist:129876								Platynereis bicanaliculata							Animalia	Annelida	Polychaeta	Phyllodocida	Nereididae	Platynereis	bicanaliculata		species		(Baird, 1863)
	imerss.org:iNat:24714358					Lena Dietz Chiasson								PRESENT				Nereis vexillosa					iNaturalist:81790								Nereis vexillosa							Animalia	Annelida	Polychaeta	Phyllodocida	Nereididae	Nereis	vexillosa		species		Grube, 1851
	imerss.org:iNat:24749850					Emily Adamczyk								PRESENT				Platynereis bicanaliculata					iNaturalist:129876								Platynereis bicanaliculata							Animalia	Annelida	Polychaeta	Phyllodocida	Nereididae	Platynereis	bicanaliculata		species		(Baird, 1863)
	imerss.org:iNat:24769046					Kelly Fretwell								PRESENT				Platynereis bicanaliculata					iNaturalist:129876								Platynereis bicanaliculata							Animalia	Annelida	Polychaeta	Phyllodocida	Nereididae	Platynereis	bicanaliculata		species		(Baird, 1863)
	imerss.org:iNat:24937295					Lena Dietz Chiasson								PRESENT				Serpula columbiana					iNaturalist:131207								Serpula columbiana							Animalia	Annelida	Polychaeta	Sabellida	Serpulidae	Serpula	columbiana		species		Johnson, 1901
	imerss.org:iNat:25199628					Aimee Pelletier								PRESENT				Platynereis bicanaliculata					iNaturalist:129876								Platynereis bicanaliculata							Animalia	Annelida	Polychaeta	Phyllodocida	Nereididae	Platynereis	bicanaliculata		species		(Baird, 1863)
	imerss.org:iNat:25586752													PRESENT				Halosydna brevisetosa					iNaturalist:71236								Halosydna brevisetosa							Animalia	Annelida	Polychaeta	Phyllodocida	Polynoidae	Halosydna	brevisetosa		species		Kinberg, 1856
	imerss.org:iNat:29520034													PRESENT				Eudistylia vancouveri					iNaturalist:84864								Eudistylia vancouveri							Animalia	Annelida	Polychaeta	Sabellida	Sabellidae	Eudistylia	vancouveri		species		(Kinberg, 1866)
	imerss.org:iNat:30012078					Galiano observer								PRESENT				Serpula columbiana					iNaturalist:131207								Serpula columbiana							Animalia	Annelida	Polychaeta	Sabellida	Serpulidae	Serpula	columbiana		species		Johnson, 1901
	imerss.org:iNat:33479377					Dave Zeuss Cochrane								PRESENT				Halosydna brevisetosa					iNaturalist:71236								Halosydna brevisetosa							Animalia	Annelida	Polychaeta	Phyllodocida	Polynoidae	Halosydna	brevisetosa		species		Kinberg, 1856
	imerss.org:iNat:43026878					Nikki Beaudoin								PRESENT				Eudistylia vancouveri					iNaturalist:84864								Eudistylia vancouveri							Animalia	Annelida	Polychaeta	Sabellida	Sabellidae	Eudistylia	vancouveri		species		(Kinberg, 1866)
	imerss.org:iNat:49172988													PRESENT				Diopatra ornata					iNaturalist:339286								Diopatra ornata							Animalia	Annelida	Polychaeta	Eunicida	Onuphidae	Diopatra	ornata		species		Moore, 1911
	imerss.org:iNat:49173169													PRESENT				Eudistylia vancouveri					iNaturalist:84864								Eudistylia vancouveri							Animalia	Annelida	Polychaeta	Sabellida	Sabellidae	Eudistylia	vancouveri		species		(Kinberg, 1866)
	imerss.org:iNat:57790054													PRESENT				Serpula columbiana					iNaturalist:131207								Serpula columbiana							Animalia	Annelida	Polychaeta	Sabellida	Serpulidae	Serpula	columbiana		species		Johnson, 1901
	imerss.org:iNat:67834429					Andrew Simon								PRESENT				Dodecaceria concharum					iNaturalist:464813								Dodecaceria concharum							Animalia	Annelida	Polychaeta	Terebellida	Cirratulidae	Dodecaceria	concharum		species		Örsted, 1843
	imerss.org:iNat:69181283					Andrew Simon								PRESENT				Eudistylia vancouveri					iNaturalist:84864								Eudistylia vancouveri							Animalia	Annelida	Polychaeta	Sabellida	Sabellidae	Eudistylia	vancouveri		species		(Kinberg, 1866)
	imerss.org:iNat:70500169					Andrew Simon								PRESENT				Dodecaceria fewkesi					iNaturalist:192656								Dodecaceria fewkesi							Animalia	Annelida	Polychaeta	Terebellida	Cirratulidae	Dodecaceria	fewkesi		species		Berkeley & Berkeley, 1954
	imerss.org:iNat:70864446					Andrew Simon								PRESENT				Dodecaceria fewkesi					iNaturalist:192656								Dodecaceria fewkesi							Animalia	Annelida	Polychaeta	Terebellida	Cirratulidae	Dodecaceria	fewkesi		species		Berkeley & Berkeley, 1954
	imerss.org:iNat:70981826					Andrew Simon								PRESENT				Parasabella media					iNaturalist:367054								Parasabella media							Animalia	Annelida	Polychaeta	Sabellida	Sabellidae	Parasabella	media		species		Bush, 1905
	imerss.org:iNat:71173020					Andrew Simon								PRESENT				Serpula columbiana					iNaturalist:131207								Serpula columbiana							Animalia	Annelida	Polychaeta	Sabellida	Serpulidae	Serpula	columbiana		species		Johnson, 1901
	imerss.org:iNat:72907409					Dave Zeuss Cochrane								PRESENT				Serpula columbiana					iNaturalist:131207								Serpula columbiana							Animalia	Annelida	Polychaeta	Sabellida	Serpulidae	Serpula	columbiana		species		Johnson, 1901
	imerss.org:iNat:73718022					Andrew Simon								PRESENT				Tomopteris					iNaturalist:194976								Tomopteris							Animalia	Annelida	Polychaeta	Phyllodocida	Tomopteridae	Tomopteris			genus
	imerss.org:iNat:76343025					Audrey Irvine-Broque								PRESENT				Serpula columbiana					iNaturalist:131207								Serpula columbiana							Animalia	Annelida	Polychaeta	Sabellida	Serpulidae	Serpula	columbiana		species		Johnson, 1901
	imerss.org:iNat:84819147					Andrew Simon								PRESENT				Dodecaceria fewkesi					iNaturalist:192656								Dodecaceria fewkesi							Animalia	Annelida	Polychaeta	Terebellida	Cirratulidae	Dodecaceria	fewkesi		species		Berkeley & Berkeley, 1954
	imerss.org:iNat:86787972					Emily Adamczyk								PRESENT				Eudistylia vancouveri					iNaturalist:84864								Eudistylia vancouveri							Animalia	Annelida	Polychaeta	Sabellida	Sabellidae	Eudistylia	vancouveri		species		(Kinberg, 1866)
	imerss.org:iNat:89818314													PRESENT				Eudistylia vancouveri					iNaturalist:84864								Eudistylia vancouveri							Animalia	Annelida	Polychaeta	Sabellida	Sabellidae	Eudistylia	vancouveri		species		(Kinberg, 1866)
	f71ac1dd-a629-4903-b97c-bc4e5ba8b074	974-00265-001						1						PRESENT				Aphrodita negligens					iNaturalist:733687								Aphrodita negligens							Animalia	Annelida	Polychaeta	Phyllodocida	Aphroditidae	Aphrodita	negligens		species		Moore, 1905
	f6bcd71a-c1b4-4d52-8e5b-77376d9552b9	989-00278-024				Dan Quayle		1						PRESENT				Eumida					iNaturalist:347275								Eumida							Animalia	Annelida	Polychaeta	Phyllodocida	Phyllodocidae	Eumida			genus
	e430f4e1-73e7-4144-9c14-e2f947a584b5	986-00197-067												PRESENT				Crucigera zygophora					iNaturalist:543574								Crucigera zygophora							Animalia	Annelida	Polychaeta	Sabellida	Serpulidae	Crucigera	zygophora		species		(Johnson, 1901)
	de1b8600-673e-43a6-ad90-de4c5bdf3286	986-00197-015						1						PRESENT				Neoleprea spiralis					iNaturalist:1136118								Neoleprea spiralis							Animalia	Annelida	Polychaeta	Terebellida	Terebellidae	Neoleprea	spiralis		species		(Johnson, 1901)
	dc35ef4a-5756-4875-abd8-14d04ed5ea3a	975-00227-001				T. Kessler		1						PRESENT				Arctonoe fragilis					iNaturalist:69914								Arctonoe fragilis							Animalia	Annelida	Polychaeta	Phyllodocida	Polynoidae	Arctonoe	fragilis		species		(Baird, 1863)
	d7b8714f-f1b1-4b32-9fca-8a5642ffd244	975-00227-003				T. Kessler		1						PRESENT				Arctonoe pulchra					iNaturalist:465156								Arctonoe pulchra							Animalia	Annelida	Polychaeta	Phyllodocida	Polynoidae	Arctonoe	pulchra		species		(Johnson, 1897)
	cc9fcfab-f833-445d-b50a-a5102f68dcb9	986-00197-062						3						PRESENT				Pseudopotamilla occelata					iNaturalist:485471								Pseudopotamilla occelata							Animalia	Annelida	Polychaeta	Sabellida	Sabellidae	Pseudopotamilla	occelata		species		Moore, 1905
	cae2e3b0-cb54-47a1-8c83-c1afd4a5cce8	986-00197-017						2						PRESENT				Trypanedenta gemmipara					iNaturalist:1136121								Trypanedenta gemmipara							Animalia	Annelida	Polychaeta	Phyllodocida	Syllidae	Trypanedenta	gemmipara		species		(Johnson, 1901)
	c7ca2146-f62e-4f3f-a71d-cdc3f022f28c	986-00197-016						3						PRESENT				Nereis zonata					iNaturalist:347330								Nereis zonata							Animalia	Annelida	Polychaeta	Phyllodocida	Nereididae	Nereis	zonata		species
	ad9c6eda-4e61-4a31-a9fc-9ad75807b435	986-00197-065						5						PRESENT				Pseudopotamilla occelata					iNaturalist:485471								Pseudopotamilla occelata							Animalia	Annelida	Polychaeta	Sabellida	Sabellidae	Pseudopotamilla	occelata		species		Moore, 1905
	ad8c83b9-d87b-4552-a45a-bfead3ac9264	978-00056-002				W. Barraclough		1						PRESENT				Tomopteridae					iNaturalist:195012															Animalia	Annelida	Polychaeta	Phyllodocida	Tomopteridae				family
	ad5111b7-2a49-44ff-b558-2da3f2f9b698	991-00598-002				Randy Baker		1						PRESENT				Limnodriloides victoriensis					iNaturalist:957352								Limnodriloides victoriensis							Animalia	Annelida	Clitellata	Tubificida	Naididae	Limnodriloides	victoriensis		species		Brinkhurst & Baker, 1979
	935b412f-8dae-4dc9-89c8-7ddb7d0a4dd2	991-00598-004				Randy Baker								PRESENT				Limnodriloides victoriensis					iNaturalist:957352								Limnodriloides victoriensis							Animalia	Annelida	Clitellata	Tubificida	Naididae	Limnodriloides	victoriensis		species		Brinkhurst & Baker, 1979
	92c5ce54-781a-40cd-9b35-d6da7ec5dc7e	986-00197-019												PRESENT				Serpula columbiana					iNaturalist:131207								Serpula columbiana							Animalia	Annelida	Polychaeta	Sabellida	Serpulidae	Serpula	columbiana		species		Johnson, 1901
	878d5251-d8ed-4009-a3b8-30b7d5afb023	975-00227-002				T. Kessler		2						PRESENT				Arctonoe vittata					iNaturalist:122163								Arctonoe vittata							Animalia	Annelida	Polychaeta	Phyllodocida	Polynoidae	Arctonoe	vittata		species		(Grube, 1855)
	8585a84d-535f-4a39-80e1-888c39e7f1ae	986-00197-020						1						PRESENT				Schizobranchia insignis					iNaturalist:339561								Schizobranchia insignis							Animalia	Annelida	Polychaeta	Sabellida	Sabellidae	Schizobranchia	insignis		species		Bush, 1905
	8355aabb-7665-4df4-806c-6e1bb84a1a02	991-00719-001				Randy Baker								PRESENT				Limnodriloides victoriensis					iNaturalist:957352								Limnodriloides victoriensis							Animalia	Annelida	Clitellata	Tubificida	Naididae	Limnodriloides	victoriensis		species		Brinkhurst & Baker, 1979
	82e061b9-1bc1-4f14-913f-e220fb993492	991-00598-003				Randy Baker								PRESENT				Limnodriloides victoriensis					iNaturalist:957352								Limnodriloides victoriensis							Animalia	Annelida	Clitellata	Tubificida	Naididae	Limnodriloides	victoriensis		species		Brinkhurst & Baker, 1979
	82d6ba94-de79-4901-bb4c-eb83a3a8f2b7	986-00197-018						1						PRESENT				Epigamia alexandri					iNaturalist:1136117								Epigamia alexandri							Animalia	Annelida	Polychaeta	Phyllodocida	Syllidae	Epigamia	alexandri		species
	7249380c-dd63-4708-9328-0a4088a3eb8a	991-00719-002				Randy Baker								PRESENT				Limnodriloides victoriensis					iNaturalist:957352								Limnodriloides victoriensis							Animalia	Annelida	Clitellata	Tubificida	Naididae	Limnodriloides	victoriensis		species		Brinkhurst & Baker, 1979
	6f43baef-3255-4f1d-9f45-2c810092c4da	986-00197-064						1						PRESENT				Cirratulus spectabilis					iNaturalist:1136116								Cirratulus spectabilis							Animalia	Annelida	Polychaeta	Terebellida	Cirratulidae	Cirratulus	spectabilis		species		(Kinberg, 1866)
	6cb4c31f-4bb3-45a0-aa37-023961344158	986-00197-014						8						PRESENT				Polynoidae					iNaturalist:53607															Animalia	Annelida	Polychaeta	Phyllodocida	Polynoidae				family
	64dc1954-4b94-4b24-9c8e-c744297d1485	991-00720-001				Randy Baker								PRESENT				Limnodriloides victoriensis					iNaturalist:957352								Limnodriloides victoriensis							Animalia	Annelida	Clitellata	Tubificida	Naididae	Limnodriloides	victoriensis		species		Brinkhurst & Baker, 1979
	591bfd98-7642-4898-a33c-f14c8ba22f67	986-00197-068						5						PRESENT				Pseudochitinopoma occidentalis					iNaturalist:538107								Pseudochitinopoma occidentalis							Animalia	Annelida	Polychaeta	Sabellida	Serpulidae	Pseudochitinopoma	occidentalis		species		(Bush, 1905)
	3a3cd972-ad42-4dbf-9fcf-a583dd32d73d	986-00197-066						1						PRESENT				Sabellidae					iNaturalist:49282															Animalia	Annelida	Polychaeta	Sabellida	Sabellidae				family
	2b477dc2-12d6-4d13-aedc-fa0e7911a967	976-01146-001						1						PRESENT				Glyceridae					iNaturalist:67315															Animalia	Annelida	Polychaeta	Phyllodocida	Glyceridae				family
	21c4331b-b493-4b98-bafb-1a7e985b1300	991-00719-005				Randy Baker								PRESENT				Limnodriloides victoriensis					iNaturalist:957352								Limnodriloides victoriensis							Animalia	Annelida	Clitellata	Tubificida	Naididae	Limnodriloides	victoriensis		species		Brinkhurst & Baker, 1979
	20cc3d3b-2689-4add-a33b-5430a5d3399e	991-00719-003				Randy Baker								PRESENT				Limnodriloides victoriensis					iNaturalist:957352								Limnodriloides victoriensis							Animalia	Annelida	Clitellata	Tubificida	Naididae	Limnodriloides	victoriensis		species		Brinkhurst & Baker, 1979
	1c33c143-5ab6-49a3-b385-ccc06def31cd	991-00719-004				Randy Baker								PRESENT				Limnodriloides victoriensis					iNaturalist:957352								Limnodriloides victoriensis							Animalia	Annelida	Clitellata	Tubificida	Naididae	Limnodriloides	victoriensis		species		Brinkhurst & Baker, 1979
	1acab3aa-c172-4513-97f1-36a04dbe76b6	986-00191-010						1						PRESENT				Serpula columbiana					iNaturalist:131207								Serpula columbiana							Animalia	Annelida	Polychaeta	Sabellida	Serpulidae	Serpula	columbiana		species		Johnson, 1901
	19360fb2-4031-4642-aa57-015eac7bd894	986-00197-063												PRESENT				Platynereis bicanaliculata					iNaturalist:129876								Platynereis bicanaliculata							Animalia	Annelida	Polychaeta	Phyllodocida	Nereididae	Platynereis	bicanaliculata		species		(Baird, 1863)
	101160e6-0e15-4b1b-a83c-5c24445b9592	991-00598-001				Randy Baker		1						PRESENT				Bathydrilus litoreus					iNaturalist:957359								Bathydrilus litoreus							Animalia	Annelida	Clitellata	Tubificida	Naididae	Bathydrilus	litoreus		species		Baker, 1983
	imerss.org:CHU2010:19849					Jackson W.F. Chu		2						PRESENT				Sabellida		Chu JWF, Leys SP (2010) High resolution mapping of community structure in three glass sponge reefs (Porifera, Hexactinellida). Marine Ecology Progress Series 417: 97‑113. https://doi.org/10.7939/r36k3q			iNaturalist:152937															Animalia	Annelida	Polychaeta	Sabellida					order
	imerss.org:CHU2010:19864					Jackson W.F. Chu		1						PRESENT				Sabellida		Chu JWF, Leys SP (2010) High resolution mapping of community structure in three glass sponge reefs (Porifera, Hexactinellida). Marine Ecology Progress Series 417: 97‑113. https://doi.org/10.7939/r36k3q			iNaturalist:152937															Animalia	Annelida	Polychaeta	Sabellida					order
	imerss.org:CHU2010:20181					Jackson W.F. Chu		2						PRESENT				Sabellida		Chu JWF, Leys SP (2010) High resolution mapping of community structure in three glass sponge reefs (Porifera, Hexactinellida). Marine Ecology Progress Series 417: 97‑113. https://doi.org/10.7939/r36k3q			iNaturalist:152937															Animalia	Annelida	Polychaeta	Sabellida					order
	imerss.org:CHU2010:20182					Jackson W.F. Chu		1						PRESENT				Sabellida		Chu JWF, Leys SP (2010) High resolution mapping of community structure in three glass sponge reefs (Porifera, Hexactinellida). Marine Ecology Progress Series 417: 97‑113. https://doi.org/10.7939/r36k3q			iNaturalist:152937															Animalia	Annelida	Polychaeta	Sabellida					order
[truncated: 105 more columns]

## Sheet: ExternalLinks
Taxon_Local_ID	Link type	Link
