# Supplementary material for: Toward an atlas of Salish Sea biodiversity: the flora and fauna of Galiano Island, British Columbia, Canada. Part I. Marine zoology
Source: Biodivers Data J. 2022 Mar 10;10:e76050. doi: 10.3897/BDJ.10.e76050 (PMC8930920; doi:10.3897/BDJ.10.e76050)
Supplement: Supplementary material 14 — Bryozoa of Galiano Island, British Columbia, Canada [file bdj-10-e76050-s014.xlsx]

## Sheet: Taxa
Taxon_Local_ID	Kingdom	Subkingdom	Phylum	Subphylum	Superclass	Class	Subclass	Superorder	Order	Suborder	Infraorder	Superfamily	Family	Subfamily	Tribe	Subtribe	Genus	Subgenus	Species	Subspecies	Variety	Form	Authorship	Nomenclature	Feeds on	symbioticWith	parasiteOf	Host of	Native Status	Conservation Status	Distribution	Horizon	Notes
551808	Animalia		Bryozoa			Gymnolaemata			Cheilostomatida	Flustrina		Buguloidea	Bugulidae				Bugulina		californica				(Robertson, 1905)
802658	Animalia		Bryozoa			Gymnolaemata			Cheilostomatida	Flustrina		Buguloidea	Bugulidae				Caulibugula		californica				Robertson, 1905
339213	Animalia		Bryozoa			Gymnolaemata			Cheilostomatida	Flustrina		Buguloidea	Bugulidae				Dendrobeania		lichenoides				(Robertson, 1900)
205170	Animalia		Bryozoa			Gymnolaemata			Cheilostomatida	Flustrina		Buguloidea	Bugulidae				Dendrobeania		murrayana				(Bean in Johnston, 1847)
196077	Animalia		Bryozoa			Gymnolaemata			Cheilostomatida	Flustrina		Cellarioidea	Cellariidae				Cellaria		diffusa				Robertson, 1905
485340	Animalia		Bryozoa			Gymnolaemata			Cheilostomatida	Flustrina		Celleporoidea	Celleporidae				Celleporina		robertsoniae				(Canu & Bassler, 1923)
51796	Animalia		Bryozoa			Gymnolaemata			Cheilostomatida	Flustrina		Celleporoidea	Phidoloporidae				Phidolopora		pacifica				(Robertson, 1908)
429861	Animalia		Bryozoa			Gymnolaemata			Cheilostomatida	Flustrina		Schizoporelloidea	Pacificincolidae				Primavelans		insculpta				(Hincks, 1883)
519486	Animalia		Bryozoa			Gymnolaemata			Cheilostomatida	Flustrina		Schizoporelloidea	Schizoporellidae				Schizoporella		japonica				Ortmann, 1890										Schizoporella japonica is an introduced species in the NEP, although we have at least one other introduced Schizoporella in California. Schizoporella unicornis is now restricted to Europe." (Jim Carlton pers. comm 2019)
360867	Animalia		Bryozoa			Gymnolaemata			Cheilostomatida	Membraniporina		Membraniporoidea	Membraniporidae				Membranipora		villosa				Hincks, 1880
873864	Animalia		Bryozoa			Gymnolaemata			Ctenostomatida	Alcyonidiina		Alcyonidioidea	Alcyonidiidae				Alcyonidium		pedunculatum				Robertson, 1902
195986	Animalia		Bryozoa			Gymnolaemata			Ctenostomatida	Vesicularina		Vesicularioidea	Vesiculariidae				Amathia		sp.														Reported as Bowerbankia Farre, 1837, an unaccepted synonym (WoRMS Editorial Board 2022).
345872	Animalia		Bryozoa			Stenolaemata			Cyclostomatida								Diaperoforma		californica				(d'Orbigny, 1853)
192680	Animalia		Bryozoa			Stenolaemata			Cyclostomatida	Articulina			Crisiidae				Crisia		spp.
873902	Animalia		Bryozoa			Stenolaemata			Cyclostomatida	Cerioporina			Heteroporidae				Heteropora		alaskensis				Borg, 1933
465163	Animalia		Bryozoa			Stenolaemata			Cyclostomatida	Cerioporina			Heteroporidae				Heteropora		pacifica				Borg, 1933
465160	Animalia		Bryozoa			Stenolaemata			Cyclostomatida	Rectangulata			Lichenoporidae				Disporella		separata				Osburn, 1953

## Sheet: Materials
typeStatus	occurrenceID	catalogNumber	occurrenceDetails	occurrenceRemarks	recordNumber	recordedBy	individualID	individualCount	sex	lifeStage	reproductiveCondition	behavior	establishmentMeans	occurrenceStatus	preparations	disposition	otherCatalogNumbers	previousIdentifications	associatedMedia	associatedReferences	associatedOccurrences	associatedSequences	taxonID	scientificNameID	acceptedNameUsageID	parentNameUsageID	originalNameUsageID	nameAccordingToID	namePublishedInID	taxonConceptID	scientificName	acceptedNameUsage	parentNameUsage	originalNameUsage	nameAccordingTo	namePublishedIn	higherClassification	kingdom	phylum	class	order	family	genus	specificEpithet	infraspecificEpithet	taxonRank	verbatimTaxonRank	scientificNameAuthorship	vernacularName
	imerss.org:PMLS:67					Andy Lamb								PRESENT				Bugulina californica					iNaturalist:551808								Bugulina californica							Animalia	Bryozoa	Gymnolaemata	Cheilostomatida	Bugulidae	Bugulina	californica		species		(Robertson, 1905)
	imerss.org:PMLS:108					Andy Lamb								PRESENT				Heteropora pacifica					iNaturalist:465163								Heteropora pacifica							Animalia	Bryozoa	Stenolaemata	Cyclostomatida	Heteroporidae	Heteropora	pacifica		species		Borg, 1933
	imerss.org:PMLS:149					Andy Lamb								PRESENT				Schizoporella japonica					iNaturalist:519486								Schizoporella japonica							Animalia	Bryozoa	Gymnolaemata	Cheilostomatida	Schizoporellidae	Schizoporella	japonica		species		Ortmann, 1890
	imerss.org:PMLS:150					Andy Lamb								PRESENT				Bugulina californica					iNaturalist:551808								Bugulina californica							Animalia	Bryozoa	Gymnolaemata	Cheilostomatida	Bugulidae	Bugulina	californica		species		(Robertson, 1905)
	imerss.org:PMLS:198					Andy Lamb								PRESENT				Bugulina californica					iNaturalist:551808								Bugulina californica							Animalia	Bryozoa	Gymnolaemata	Cheilostomatida	Bugulidae	Bugulina	californica		species		(Robertson, 1905)
	imerss.org:PMLS:245					Andy Lamb								PRESENT				Heteropora pacifica					iNaturalist:465163								Heteropora pacifica							Animalia	Bryozoa	Stenolaemata	Cyclostomatida	Heteroporidae	Heteropora	pacifica		species		Borg, 1933
	imerss.org:PMLS:298					Andy Lamb								PRESENT				Bugulina californica					iNaturalist:551808								Bugulina californica							Animalia	Bryozoa	Gymnolaemata	Cheilostomatida	Bugulidae	Bugulina	californica		species		(Robertson, 1905)
	imerss.org:PMLS:299					Andy Lamb								PRESENT				Dendrobeania lichenoides					iNaturalist:339213								Dendrobeania lichenoides							Animalia	Bryozoa	Gymnolaemata	Cheilostomatida	Bugulidae	Dendrobeania	lichenoides		species		(Robertson, 1900)
	imerss.org:PMLS:300					Andy Lamb								PRESENT				Crisia spp.					iNaturalist:192680								Crisia							Animalia	Bryozoa	Stenolaemata	Cyclostomatida	Crisiidae	Crisia			genus
	imerss.org:PMLS:301					Andy Lamb								PRESENT				Heteropora pacifica					iNaturalist:465163								Heteropora pacifica							Animalia	Bryozoa	Stenolaemata	Cyclostomatida	Heteroporidae	Heteropora	pacifica		species		Borg, 1933
	imerss.org:PMLS:395					Andy Lamb								PRESENT				Schizoporella japonica					iNaturalist:519486								Schizoporella japonica							Animalia	Bryozoa	Gymnolaemata	Cheilostomatida	Schizoporellidae	Schizoporella	japonica		species		Ortmann, 1890
	imerss.org:PMLS:396			Count: some		Andy Lamb								PRESENT				Bugulina californica					iNaturalist:551808								Bugulina californica							Animalia	Bryozoa	Gymnolaemata	Cheilostomatida	Bugulidae	Bugulina	californica		species		(Robertson, 1905)
	imerss.org:PMLS:397					Andy Lamb								PRESENT				Dendrobeania murrayana					iNaturalist:205170								Dendrobeania murrayana							Animalia	Bryozoa	Gymnolaemata	Cheilostomatida	Bugulidae	Dendrobeania	murrayana		species		(Bean in Johnston, 1847)
	imerss.org:PMLS:398			Count: abundant		Andy Lamb								PRESENT				Heteropora pacifica					iNaturalist:465163								Heteropora pacifica							Animalia	Bryozoa	Stenolaemata	Cyclostomatida	Heteroporidae	Heteropora	pacifica		species		Borg, 1933
	imerss.org:PMLS:484			Count: some		Andy Lamb								PRESENT				Bugulina californica					iNaturalist:551808								Bugulina californica							Animalia	Bryozoa	Gymnolaemata	Cheilostomatida	Bugulidae	Bugulina	californica		species		(Robertson, 1905)
	imerss.org:PMLS:485					Andy Lamb								PRESENT				Dendrobeania murrayana					iNaturalist:205170								Dendrobeania murrayana							Animalia	Bryozoa	Gymnolaemata	Cheilostomatida	Bugulidae	Dendrobeania	murrayana		species		(Bean in Johnston, 1847)
	imerss.org:PMLS:486					Andy Lamb								PRESENT				Crisia spp.					iNaturalist:192680								Crisia							Animalia	Bryozoa	Stenolaemata	Cyclostomatida	Crisiidae	Crisia			genus
	imerss.org:PMLS:487					Andy Lamb								PRESENT				Phidolopora pacifica					iNaturalist:51796								Phidolopora pacifica							Animalia	Bryozoa	Gymnolaemata	Cheilostomatida	Phidoloporidae	Phidolopora	pacifica		species		(Robertson, 1908)
	imerss.org:PMLS:488					Andy Lamb								PRESENT				Heteropora pacifica					iNaturalist:465163								Heteropora pacifica							Animalia	Bryozoa	Stenolaemata	Cyclostomatida	Heteroporidae	Heteropora	pacifica		species		Borg, 1933
	imerss.org:PMLS:489					Andy Lamb								PRESENT				Diaperoforma californica					iNaturalist:345872								Diaperoforma californica							Animalia	Bryozoa	Stenolaemata	Cyclostomatida		Diaperoforma	californica		species		(d'Orbigny, 1853)
	imerss.org:PMLS:568			Count: some		Andy Lamb								PRESENT				Crisia spp.					iNaturalist:192680								Crisia							Animalia	Bryozoa	Stenolaemata	Cyclostomatida	Crisiidae	Crisia			genus
	imerss.org:PMLS:639					Charlie Gibbs								PRESENT				Phidolopora pacifica					iNaturalist:51796								Phidolopora pacifica							Animalia	Bryozoa	Gymnolaemata	Cheilostomatida	Phidoloporidae	Phidolopora	pacifica		species		(Robertson, 1908)
	imerss.org:PMLS:731			Count: some		Andy Lamb								PRESENT				Diaperoforma californica					iNaturalist:345872								Diaperoforma californica							Animalia	Bryozoa	Stenolaemata	Cyclostomatida		Diaperoforma	californica		species		(d'Orbigny, 1853)
	imerss.org:PMLS:732			Count: some		Andy Lamb								PRESENT				Heteropora pacifica					iNaturalist:465163								Heteropora pacifica							Animalia	Bryozoa	Stenolaemata	Cyclostomatida	Heteroporidae	Heteropora	pacifica		species		Borg, 1933
	imerss.org:PMLS:733			Count: some		Andy Lamb								PRESENT				Membranipora villosa					iNaturalist:360867								Membranipora villosa							Animalia	Bryozoa	Gymnolaemata	Cheilostomatida	Membraniporidae	Membranipora	villosa		species		Hincks, 1880
	imerss.org:PMLS:806					Charlie Gibbs								PRESENT				Crisia spp.					iNaturalist:192680								Crisia							Animalia	Bryozoa	Stenolaemata	Cyclostomatida	Crisiidae	Crisia			genus
	imerss.org:PMLS:807					Charlie Gibbs								PRESENT				Heteropora pacifica					iNaturalist:465163								Heteropora pacifica							Animalia	Bryozoa	Stenolaemata	Cyclostomatida	Heteroporidae	Heteropora	pacifica		species		Borg, 1933
	imerss.org:PMLS:808					Charlie Gibbs								PRESENT				Alcyonidium pedunculatum					iNaturalist:873864								Alcyonidium pedunculatum							Animalia	Bryozoa	Gymnolaemata	Ctenostomatida	Alcyonidiidae	Alcyonidium	pedunculatum		species		Robertson, 1902
	imerss.org:PMLS:809					Charlie Gibbs								PRESENT				Phidolopora pacifica					iNaturalist:51796								Phidolopora pacifica							Animalia	Bryozoa	Gymnolaemata	Cheilostomatida	Phidoloporidae	Phidolopora	pacifica		species		(Robertson, 1908)
	imerss.org:PMLS:865					Charlie Gibbs								PRESENT				Crisia spp.					iNaturalist:192680								Crisia							Animalia	Bryozoa	Stenolaemata	Cyclostomatida	Crisiidae	Crisia			genus
	imerss.org:PMLS:866					Charlie Gibbs								PRESENT				Alcyonidium pedunculatum					iNaturalist:873864								Alcyonidium pedunculatum							Animalia	Bryozoa	Gymnolaemata	Ctenostomatida	Alcyonidiidae	Alcyonidium	pedunculatum		species		Robertson, 1902
	imerss.org:PMLS:867					Charlie Gibbs								PRESENT				Heteropora pacifica					iNaturalist:465163								Heteropora pacifica							Animalia	Bryozoa	Stenolaemata	Cyclostomatida	Heteroporidae	Heteropora	pacifica		species		Borg, 1933
	imerss.org:PMLS:936					Charlie Gibbs								PRESENT				Crisia spp.					iNaturalist:192680								Crisia							Animalia	Bryozoa	Stenolaemata	Cyclostomatida	Crisiidae	Crisia			genus
	imerss.org:PMLS:1024			Count: many		Andy Lamb								PRESENT				Membranipora villosa					iNaturalist:360867								Membranipora villosa							Animalia	Bryozoa	Gymnolaemata	Cheilostomatida	Membraniporidae	Membranipora	villosa		species		Hincks, 1880
	imerss.org:PMLS:1025			Count: many		Andy Lamb								PRESENT				Schizoporella japonica					iNaturalist:519486								Schizoporella japonica							Animalia	Bryozoa	Gymnolaemata	Cheilostomatida	Schizoporellidae	Schizoporella	japonica		species		Ortmann, 1890
	imerss.org:PMLS:1026			Count: few		Andy Lamb								PRESENT				Crisia spp.					iNaturalist:192680								Crisia							Animalia	Bryozoa	Stenolaemata	Cyclostomatida	Crisiidae	Crisia			genus
	imerss.org:PMLS:1027			Count: some		Andy Lamb								PRESENT				Heteropora pacifica					iNaturalist:465163								Heteropora pacifica							Animalia	Bryozoa	Stenolaemata	Cyclostomatida	Heteroporidae	Heteropora	pacifica		species		Borg, 1933
	imerss.org:PMLS:1028					Andy Lamb								PRESENT				Diaperoforma californica					iNaturalist:345872								Diaperoforma californica							Animalia	Bryozoa	Stenolaemata	Cyclostomatida		Diaperoforma	californica		species		(d'Orbigny, 1853)
	imerss.org:PMLS:1116			Count: abundant		Andy Lamb								PRESENT				Crisia spp.					iNaturalist:192680								Crisia							Animalia	Bryozoa	Stenolaemata	Cyclostomatida	Crisiidae	Crisia			genus
	imerss.org:PMLS:1117					Andy Lamb								PRESENT				Diaperoforma californica					iNaturalist:345872								Diaperoforma californica							Animalia	Bryozoa	Stenolaemata	Cyclostomatida		Diaperoforma	californica		species		(d'Orbigny, 1853)
	imerss.org:PMLS:1278			Count: some		Andy Lamb								PRESENT				Diaperoforma californica					iNaturalist:345872								Diaperoforma californica							Animalia	Bryozoa	Stenolaemata	Cyclostomatida		Diaperoforma	californica		species		(d'Orbigny, 1853)
	imerss.org:PMLS:1279					Andy Lamb								PRESENT				Crisia spp.					iNaturalist:192680								Crisia							Animalia	Bryozoa	Stenolaemata	Cyclostomatida	Crisiidae	Crisia			genus
	imerss.org:PMLS:1280			Count: few		Andy Lamb								PRESENT				Heteropora pacifica					iNaturalist:465163								Heteropora pacifica							Animalia	Bryozoa	Stenolaemata	Cyclostomatida	Heteroporidae	Heteropora	pacifica		species		Borg, 1933
	imerss.org:PMLS:1281					Andy Lamb								PRESENT				Membranipora villosa					iNaturalist:360867								Membranipora villosa							Animalia	Bryozoa	Gymnolaemata	Cheilostomatida	Membraniporidae	Membranipora	villosa		species		Hincks, 1880
	imerss.org:PMLS:1282					Andy Lamb								PRESENT				Bugulina californica					iNaturalist:551808								Bugulina californica							Animalia	Bryozoa	Gymnolaemata	Cheilostomatida	Bugulidae	Bugulina	californica		species		(Robertson, 1905)
	imerss.org:PMLS:1283					Andy Lamb		1						PRESENT				Dendrobeania lichenoides					iNaturalist:339213								Dendrobeania lichenoides							Animalia	Bryozoa	Gymnolaemata	Cheilostomatida	Bugulidae	Dendrobeania	lichenoides		species		(Robertson, 1900)
	imerss.org:PMLS:1284					Andy Lamb								PRESENT				Schizoporella japonica					iNaturalist:519486								Schizoporella japonica							Animalia	Bryozoa	Gymnolaemata	Cheilostomatida	Schizoporellidae	Schizoporella	japonica		species		Ortmann, 1890
	imerss.org:PMLS:1393					Charlie Gibbs								PRESENT				Phidolopora pacifica					iNaturalist:51796								Phidolopora pacifica							Animalia	Bryozoa	Gymnolaemata	Cheilostomatida	Phidoloporidae	Phidolopora	pacifica		species		(Robertson, 1908)
	imerss.org:PMLS:1394					Charlie Gibbs								PRESENT				Diaperoforma californica					iNaturalist:345872								Diaperoforma californica							Animalia	Bryozoa	Stenolaemata	Cyclostomatida		Diaperoforma	californica		species		(d'Orbigny, 1853)
	imerss.org:PMLS:1481					Charlie Gibbs								PRESENT				Crisia spp.					iNaturalist:192680								Crisia							Animalia	Bryozoa	Stenolaemata	Cyclostomatida	Crisiidae	Crisia			genus
	imerss.org:PMLS:1482					Charlie Gibbs								PRESENT				Cellaria diffusa					iNaturalist:196077								Cellaria diffusa							Animalia	Bryozoa	Gymnolaemata	Cheilostomatida	Cellariidae	Cellaria	diffusa		species		Robertson, 1905
	imerss.org:PMLS:1483					Charlie Gibbs								PRESENT				Phidolopora pacifica					iNaturalist:51796								Phidolopora pacifica							Animalia	Bryozoa	Gymnolaemata	Cheilostomatida	Phidoloporidae	Phidolopora	pacifica		species		(Robertson, 1908)
	imerss.org:PMLS:1484					Charlie Gibbs								PRESENT				Heteropora pacifica					iNaturalist:465163								Heteropora pacifica							Animalia	Bryozoa	Stenolaemata	Cyclostomatida	Heteroporidae	Heteropora	pacifica		species		Borg, 1933
	imerss.org:PMLS:1485					Charlie Gibbs								PRESENT				Diaperoforma californica					iNaturalist:345872								Diaperoforma californica							Animalia	Bryozoa	Stenolaemata	Cyclostomatida		Diaperoforma	californica		species		(d'Orbigny, 1853)
	imerss.org:PMLS:1582					Charlie Gibbs								PRESENT				Dendrobeania murrayana					iNaturalist:205170								Dendrobeania murrayana							Animalia	Bryozoa	Gymnolaemata	Cheilostomatida	Bugulidae	Dendrobeania	murrayana		species		(Bean in Johnston, 1847)
	imerss.org:PMLS:1583					Charlie Gibbs								PRESENT				Crisia spp.					iNaturalist:192680								Crisia							Animalia	Bryozoa	Stenolaemata	Cyclostomatida	Crisiidae	Crisia			genus
	imerss.org:PMLS:1584					Charlie Gibbs								PRESENT				Phidolopora pacifica					iNaturalist:51796								Phidolopora pacifica							Animalia	Bryozoa	Gymnolaemata	Cheilostomatida	Phidoloporidae	Phidolopora	pacifica		species		(Robertson, 1908)
	imerss.org:PMLS:1585					Charlie Gibbs								PRESENT				Heteropora pacifica					iNaturalist:465163								Heteropora pacifica							Animalia	Bryozoa	Stenolaemata	Cyclostomatida	Heteroporidae	Heteropora	pacifica		species		Borg, 1933
	imerss.org:PMLS:1676					Charlie Gibbs								PRESENT				Dendrobeania murrayana					iNaturalist:205170								Dendrobeania murrayana							Animalia	Bryozoa	Gymnolaemata	Cheilostomatida	Bugulidae	Dendrobeania	murrayana		species		(Bean in Johnston, 1847)
	imerss.org:PMLS:1677					Charlie Gibbs								PRESENT				Crisia spp.					iNaturalist:192680								Crisia							Animalia	Bryozoa	Stenolaemata	Cyclostomatida	Crisiidae	Crisia			genus
	imerss.org:PMLS:1678					Charlie Gibbs								PRESENT				Phidolopora pacifica					iNaturalist:51796								Phidolopora pacifica							Animalia	Bryozoa	Gymnolaemata	Cheilostomatida	Phidoloporidae	Phidolopora	pacifica		species		(Robertson, 1908)
	imerss.org:PMLS:1679					Charlie Gibbs								PRESENT				Heteropora pacifica					iNaturalist:465163								Heteropora pacifica							Animalia	Bryozoa	Stenolaemata	Cyclostomatida	Heteroporidae	Heteropora	pacifica		species		Borg, 1933
	imerss.org:PMLS:1790					Charlie Gibbs								PRESENT				Heteropora pacifica					iNaturalist:465163								Heteropora pacifica							Animalia	Bryozoa	Stenolaemata	Cyclostomatida	Heteroporidae	Heteropora	pacifica		species		Borg, 1933
	imerss.org:PMLS:1791					Charlie Gibbs								PRESENT				Dendrobeania murrayana					iNaturalist:205170								Dendrobeania murrayana							Animalia	Bryozoa	Gymnolaemata	Cheilostomatida	Bugulidae	Dendrobeania	murrayana		species		(Bean in Johnston, 1847)
	imerss.org:PMLS:1792					Charlie Gibbs								PRESENT				Phidolopora pacifica					iNaturalist:51796								Phidolopora pacifica							Animalia	Bryozoa	Gymnolaemata	Cheilostomatida	Phidoloporidae	Phidolopora	pacifica		species		(Robertson, 1908)
	imerss.org:PMLS:1849					Charlie Gibbs								PRESENT				Crisia spp.					iNaturalist:192680								Crisia							Animalia	Bryozoa	Stenolaemata	Cyclostomatida	Crisiidae	Crisia			genus
	imerss.org:PMLS:1850					Charlie Gibbs								PRESENT				Phidolopora pacifica					iNaturalist:51796								Phidolopora pacifica							Animalia	Bryozoa	Gymnolaemata	Cheilostomatida	Phidoloporidae	Phidolopora	pacifica		species		(Robertson, 1908)
	imerss.org:PMLS:1851					Charlie Gibbs								PRESENT				Heteropora pacifica					iNaturalist:465163								Heteropora pacifica							Animalia	Bryozoa	Stenolaemata	Cyclostomatida	Heteroporidae	Heteropora	pacifica		species		Borg, 1933
	imerss.org:PMLS:1852					Charlie Gibbs								PRESENT				Primavelans insculpta					iNaturalist:429861								Primavelans insculpta							Animalia	Bryozoa	Gymnolaemata	Cheilostomatida	Pacificincolidae	Primavelans	insculpta		species		(Hincks, 1883)
	imerss.org:PMLS:1923					Charlie Gibbs								PRESENT				Dendrobeania murrayana					iNaturalist:205170								Dendrobeania murrayana							Animalia	Bryozoa	Gymnolaemata	Cheilostomatida	Bugulidae	Dendrobeania	murrayana		species		(Bean in Johnston, 1847)
	imerss.org:PMLS:1924					Charlie Gibbs								PRESENT				Crisia spp.					iNaturalist:192680								Crisia							Animalia	Bryozoa	Stenolaemata	Cyclostomatida	Crisiidae	Crisia			genus
	imerss.org:PMLS:1925					Charlie Gibbs								PRESENT				Phidolopora pacifica					iNaturalist:51796								Phidolopora pacifica							Animalia	Bryozoa	Gymnolaemata	Cheilostomatida	Phidoloporidae	Phidolopora	pacifica		species		(Robertson, 1908)
	imerss.org:PMLS:1926					Charlie Gibbs								PRESENT				Heteropora pacifica					iNaturalist:465163								Heteropora pacifica							Animalia	Bryozoa	Stenolaemata	Cyclostomatida	Heteroporidae	Heteropora	pacifica		species		Borg, 1933
	imerss.org:PMLS:1927					Charlie Gibbs								PRESENT				Primavelans insculpta					iNaturalist:429861								Primavelans insculpta							Animalia	Bryozoa	Gymnolaemata	Cheilostomatida	Pacificincolidae	Primavelans	insculpta		species		(Hincks, 1883)
	imerss.org:PMLS:2036					Charlie Gibbs								PRESENT				Diaperoforma californica					iNaturalist:345872								Diaperoforma californica							Animalia	Bryozoa	Stenolaemata	Cyclostomatida		Diaperoforma	californica		species		(d'Orbigny, 1853)
	imerss.org:PMLS:2037					Charlie Gibbs								PRESENT				Crisia spp.					iNaturalist:192680								Crisia							Animalia	Bryozoa	Stenolaemata	Cyclostomatida	Crisiidae	Crisia			genus
	imerss.org:PMLS:2038					Charlie Gibbs								PRESENT				Heteropora pacifica					iNaturalist:465163								Heteropora pacifica							Animalia	Bryozoa	Stenolaemata	Cyclostomatida	Heteroporidae	Heteropora	pacifica		species		Borg, 1933
	imerss.org:PMLS:2039					Charlie Gibbs								PRESENT				Schizoporella japonica					iNaturalist:519486								Schizoporella japonica							Animalia	Bryozoa	Gymnolaemata	Cheilostomatida	Schizoporellidae	Schizoporella	japonica		species		Ortmann, 1890
	imerss.org:PMLS:2040					Charlie Gibbs								PRESENT				Primavelans insculpta					iNaturalist:429861								Primavelans insculpta							Animalia	Bryozoa	Gymnolaemata	Cheilostomatida	Pacificincolidae	Primavelans	insculpta		species		(Hincks, 1883)
	imerss.org:PMLS:2100					Charlie Gibbs								PRESENT				Schizoporella japonica					iNaturalist:519486								Schizoporella japonica							Animalia	Bryozoa	Gymnolaemata	Cheilostomatida	Schizoporellidae	Schizoporella	japonica		species		Ortmann, 1890
	imerss.org:PMLS:2101					Charlie Gibbs								PRESENT				Crisia spp.					iNaturalist:192680								Crisia							Animalia	Bryozoa	Stenolaemata	Cyclostomatida	Crisiidae	Crisia			genus
	imerss.org:PMLS:2102					Charlie Gibbs								PRESENT				Heteropora pacifica					iNaturalist:465163								Heteropora pacifica							Animalia	Bryozoa	Stenolaemata	Cyclostomatida	Heteroporidae	Heteropora	pacifica		species		Borg, 1933
	imerss.org:PMLS:2103					Charlie Gibbs								PRESENT				Primavelans insculpta					iNaturalist:429861								Primavelans insculpta							Animalia	Bryozoa	Gymnolaemata	Cheilostomatida	Pacificincolidae	Primavelans	insculpta		species		(Hincks, 1883)
	imerss.org:PMLS:2236					Charlie Gibbs								PRESENT				Crisia spp.					iNaturalist:192680								Crisia							Animalia	Bryozoa	Stenolaemata	Cyclostomatida	Crisiidae	Crisia			genus
	imerss.org:PMLS:2237					Charlie Gibbs								PRESENT				Heteropora pacifica					iNaturalist:465163								Heteropora pacifica							Animalia	Bryozoa	Stenolaemata	Cyclostomatida	Heteroporidae	Heteropora	pacifica		species		Borg, 1933
	imerss.org:PMLS:2330					Charlie Gibbs								PRESENT				Heteropora pacifica					iNaturalist:465163								Heteropora pacifica							Animalia	Bryozoa	Stenolaemata	Cyclostomatida	Heteroporidae	Heteropora	pacifica		species		Borg, 1933
	imerss.org:PMLS:2331					Charlie Gibbs								PRESENT				Bugulina californica					iNaturalist:551808								Bugulina californica							Animalia	Bryozoa	Gymnolaemata	Cheilostomatida	Bugulidae	Bugulina	californica		species		(Robertson, 1905)
	imerss.org:PMLS:2332					Charlie Gibbs								PRESENT				Phidolopora pacifica					iNaturalist:51796								Phidolopora pacifica							Animalia	Bryozoa	Gymnolaemata	Cheilostomatida	Phidoloporidae	Phidolopora	pacifica		species		(Robertson, 1908)
	imerss.org:PMLS:2438					Charlie Gibbs								PRESENT				Diaperoforma californica					iNaturalist:345872								Diaperoforma californica							Animalia	Bryozoa	Stenolaemata	Cyclostomatida		Diaperoforma	californica		species		(d'Orbigny, 1853)
	imerss.org:PMLS:2439					Charlie Gibbs								PRESENT				Crisia spp.					iNaturalist:192680								Crisia							Animalia	Bryozoa	Stenolaemata	Cyclostomatida	Crisiidae	Crisia			genus
	imerss.org:PMLS:2440					Charlie Gibbs								PRESENT				Membranipora villosa					iNaturalist:360867								Membranipora villosa							Animalia	Bryozoa	Gymnolaemata	Cheilostomatida	Membraniporidae	Membranipora	villosa		species		Hincks, 1880
	imerss.org:PMLS:2441					Charlie Gibbs								PRESENT				Phidolopora pacifica					iNaturalist:51796								Phidolopora pacifica							Animalia	Bryozoa	Gymnolaemata	Cheilostomatida	Phidoloporidae	Phidolopora	pacifica		species		(Robertson, 1908)
	imerss.org:PMLS:2522					Charlie Gibbs								PRESENT				Diaperoforma californica					iNaturalist:345872								Diaperoforma californica							Animalia	Bryozoa	Stenolaemata	Cyclostomatida		Diaperoforma	californica		species		(d'Orbigny, 1853)
	imerss.org:PMLS:2523					Charlie Gibbs								PRESENT				Crisia spp.					iNaturalist:192680								Crisia							Animalia	Bryozoa	Stenolaemata	Cyclostomatida	Crisiidae	Crisia			genus
	imerss.org:PMLS:2524					Charlie Gibbs								PRESENT				Membranipora villosa					iNaturalist:360867								Membranipora villosa							Animalia	Bryozoa	Gymnolaemata	Cheilostomatida	Membraniporidae	Membranipora	villosa		species		Hincks, 1880
	imerss.org:PMLS:2608					Charlie Gibbs								PRESENT				Diaperoforma californica					iNaturalist:345872								Diaperoforma californica							Animalia	Bryozoa	Stenolaemata	Cyclostomatida		Diaperoforma	californica		species		(d'Orbigny, 1853)
	imerss.org:PMLS:2609					Charlie Gibbs								PRESENT				Crisia spp.					iNaturalist:192680								Crisia							Animalia	Bryozoa	Stenolaemata	Cyclostomatida	Crisiidae	Crisia			genus
	imerss.org:PMLS:2610					Charlie Gibbs								PRESENT				Membranipora villosa					iNaturalist:360867								Membranipora villosa							Animalia	Bryozoa	Gymnolaemata	Cheilostomatida	Membraniporidae	Membranipora	villosa		species		Hincks, 1880
	imerss.org:PMLS:2611					Charlie Gibbs								PRESENT				Dendrobeania murrayana					iNaturalist:205170								Dendrobeania murrayana							Animalia	Bryozoa	Gymnolaemata	Cheilostomatida	Bugulidae	Dendrobeania	murrayana		species		(Bean in Johnston, 1847)
	imerss.org:PMLS:2702					Charlie Gibbs								PRESENT				Crisia spp.					iNaturalist:192680								Crisia							Animalia	Bryozoa	Stenolaemata	Cyclostomatida	Crisiidae	Crisia			genus
	imerss.org:PMLS:2703					Charlie Gibbs								PRESENT				Membranipora villosa					iNaturalist:360867								Membranipora villosa							Animalia	Bryozoa	Gymnolaemata	Cheilostomatida	Membraniporidae	Membranipora	villosa		species		Hincks, 1880
	imerss.org:PMLS:2704					Charlie Gibbs								PRESENT				Schizoporella japonica					iNaturalist:519486								Schizoporella japonica							Animalia	Bryozoa	Gymnolaemata	Cheilostomatida	Schizoporellidae	Schizoporella	japonica		species		Ortmann, 1890
	imerss.org:PMLS:2751					Donna Gibbs								PRESENT				Heteropora pacifica					iNaturalist:465163								Heteropora pacifica							Animalia	Bryozoa	Stenolaemata	Cyclostomatida	Heteroporidae	Heteropora	pacifica		species		Borg, 1933
	imerss.org:PMLS:2757					Donna Gibbs								PRESENT				Disporella separata					iNaturalist:465160								Disporella separata							Animalia	Bryozoa	Stenolaemata	Cyclostomatida	Lichenoporidae	Disporella	separata		species		Osburn, 1953
	imerss.org:PMLS:2758					Donna Gibbs								PRESENT				Heteropora pacifica					iNaturalist:465163								Heteropora pacifica							Animalia	Bryozoa	Stenolaemata	Cyclostomatida	Heteroporidae	Heteropora	pacifica		species		Borg, 1933
	imerss.org:PMLS:2759					Donna Gibbs								PRESENT				Diaperoforma californica					iNaturalist:345872								Diaperoforma californica							Animalia	Bryozoa	Stenolaemata	Cyclostomatida		Diaperoforma	californica		species		(d'Orbigny, 1853)
	imerss.org:PMLS:2760					Donna Gibbs								PRESENT				Celleporina robertsoniae					iNaturalist:485340								Celleporina robertsoniae							Animalia	Bryozoa	Gymnolaemata	Cheilostomatida	Celleporidae	Celleporina	robertsoniae		species		(Canu & Bassler, 1923)
	imerss.org:PMLS:2795			Count: few		Andy Lamb								PRESENT				Crisia spp.					iNaturalist:192680								Crisia							Animalia	Bryozoa	Stenolaemata	Cyclostomatida	Crisiidae	Crisia			genus
	imerss.org:PMLS:2887					Charlie Gibbs								PRESENT				Membranipora villosa					iNaturalist:360867								Membranipora villosa							Animalia	Bryozoa	Gymnolaemata	Cheilostomatida	Membraniporidae	Membranipora	villosa		species		Hincks, 1880
	imerss.org:PMLS:2888					Charlie Gibbs								PRESENT				Schizoporella japonica					iNaturalist:519486								Schizoporella japonica							Animalia	Bryozoa	Gymnolaemata	Cheilostomatida	Schizoporellidae	Schizoporella	japonica		species		Ortmann, 1890
	imerss.org:PMLS:2889					Charlie Gibbs		1						PRESENT				Bugulina californica					iNaturalist:551808								Bugulina californica							Animalia	Bryozoa	Gymnolaemata	Cheilostomatida	Bugulidae	Bugulina	californica		species		(Robertson, 1905)
	imerss.org:PMLS:2890			Count: abundant		Charlie Gibbs								PRESENT				Dendrobeania lichenoides					iNaturalist:339213								Dendrobeania lichenoides							Animalia	Bryozoa	Gymnolaemata	Cheilostomatida	Bugulidae	Dendrobeania	lichenoides		species		(Robertson, 1900)
	imerss.org:PMLS:2891					Charlie Gibbs								PRESENT				Crisia spp.					iNaturalist:192680								Crisia							Animalia	Bryozoa	Stenolaemata	Cyclostomatida	Crisiidae	Crisia			genus
	imerss.org:PMLS:2892					Charlie Gibbs								PRESENT				Heteropora pacifica					iNaturalist:465163								Heteropora pacifica							Animalia	Bryozoa	Stenolaemata	Cyclostomatida	Heteroporidae	Heteropora	pacifica		species		Borg, 1933
	imerss.org:PMLS:2893					Charlie Gibbs								PRESENT				Diaperoforma californica					iNaturalist:345872								Diaperoforma californica							Animalia	Bryozoa	Stenolaemata	Cyclostomatida		Diaperoforma	californica		species		(d'Orbigny, 1853)
	imerss.org:PMLS:2894					Charlie Gibbs		1						PRESENT				Celleporina robertsoniae					iNaturalist:485340								Celleporina robertsoniae							Animalia	Bryozoa	Gymnolaemata	Cheilostomatida	Celleporidae	Celleporina	robertsoniae		species		(Canu & Bassler, 1923)
	imerss.org:PMLS:3025			Count: some		Andy Lamb								PRESENT				Membranipora villosa					iNaturalist:360867								Membranipora villosa							Animalia	Bryozoa	Gymnolaemata	Cheilostomatida	Membraniporidae	Membranipora	villosa		species		Hincks, 1880
	imerss.org:PMLS:3137			Count: few		Andy Lamb								PRESENT				Diaperoforma californica					iNaturalist:345872								Diaperoforma californica							Animalia	Bryozoa	Stenolaemata	Cyclostomatida		Diaperoforma	californica		species		(d'Orbigny, 1853)
	imerss.org:PMLS:3207			Count: few		Andy Lamb								PRESENT				Disporella separata					iNaturalist:465160								Disporella separata							Animalia	Bryozoa	Stenolaemata	Cyclostomatida	Lichenoporidae	Disporella	separata		species		Osburn, 1953
	imerss.org:PMLS:3208			Count: some		Andy Lamb								PRESENT				Dendrobeania lichenoides					iNaturalist:339213								Dendrobeania lichenoides							Animalia	Bryozoa	Gymnolaemata	Cheilostomatida	Bugulidae	Dendrobeania	lichenoides		species		(Robertson, 1900)
	imerss.org:PMLS:3209			Count: very many		Andy Lamb								PRESENT				Crisia spp.					iNaturalist:192680								Crisia							Animalia	Bryozoa	Stenolaemata	Cyclostomatida	Crisiidae	Crisia			genus
	imerss.org:PMLS:3210			Count: some		Andy Lamb								PRESENT				Heteropora pacifica					iNaturalist:465163								Heteropora pacifica							Animalia	Bryozoa	Stenolaemata	Cyclostomatida	Heteroporidae	Heteropora	pacifica		species		Borg, 1933
	imerss.org:PMLS:3211			Count: very many		Andy Lamb								PRESENT				Diaperoforma californica					iNaturalist:345872								Diaperoforma californica							Animalia	Bryozoa	Stenolaemata	Cyclostomatida		Diaperoforma	californica		species		(d'Orbigny, 1853)
	imerss.org:PMLS:3319			Count: some		Andy Lamb								PRESENT				Dendrobeania murrayana					iNaturalist:205170								Dendrobeania murrayana							Animalia	Bryozoa	Gymnolaemata	Cheilostomatida	Bugulidae	Dendrobeania	murrayana		species		(Bean in Johnston, 1847)
	imerss.org:PMLS:3320			Count: few		Andy Lamb								PRESENT				Crisia spp.					iNaturalist:192680								Crisia							Animalia	Bryozoa	Stenolaemata	Cyclostomatida	Crisiidae	Crisia			genus
	imerss.org:PMLS:3415			Count: very many		Andy Lamb								PRESENT				Membranipora villosa					iNaturalist:360867								Membranipora villosa							Animalia	Bryozoa	Gymnolaemata	Cheilostomatida	Membraniporidae	Membranipora	villosa		species		Hincks, 1880
	imerss.org:PMLS:3416			Count: few		Andy Lamb								PRESENT				Bowerbankia sp.					iNaturalist:195986								Amathia							Animalia	Bryozoa	Gymnolaemata	Ctenostomatida	Vesiculariidae	Amathia			genus
	imerss.org:PMLS:3417					Andy Lamb		2						PRESENT				Bugulina californica					iNaturalist:551808								Bugulina californica							Animalia	Bryozoa	Gymnolaemata	Cheilostomatida	Bugulidae	Bugulina	californica		species		(Robertson, 1905)
	imerss.org:PMLS:3418			Count: few		Andy Lamb								PRESENT				Crisia spp.					iNaturalist:192680								Crisia							Animalia	Bryozoa	Stenolaemata	Cyclostomatida	Crisiidae	Crisia			genus
	imerss.org:PMLS:3544			Count: some		Andy Lamb								PRESENT				Membranipora villosa					iNaturalist:360867								Membranipora villosa							Animalia	Bryozoa	Gymnolaemata	Cheilostomatida	Membraniporidae	Membranipora	villosa		species		Hincks, 1880
	imerss.org:PMLS:3545			Count: few		Andy Lamb								PRESENT				Bugulina californica					iNaturalist:551808								Bugulina californica							Animalia	Bryozoa	Gymnolaemata	Cheilostomatida	Bugulidae	Bugulina	californica		species		(Robertson, 1905)
	imerss.org:PMLS:3546			Count: few		Andy Lamb								PRESENT				Crisia spp.					iNaturalist:192680								Crisia							Animalia	Bryozoa	Stenolaemata	Cyclostomatida	Crisiidae	Crisia			genus
	imerss.org:PMLS:3547			Count: few		Andy Lamb								PRESENT				Heteropora pacifica					iNaturalist:465163								Heteropora pacifica							Animalia	Bryozoa	Stenolaemata	Cyclostomatida	Heteroporidae	Heteropora	pacifica		species		Borg, 1933
	imerss.org:PMLS:3680			Count: very many		Andy Lamb								PRESENT				Schizoporella japonica					iNaturalist:519486								Schizoporella japonica							Animalia	Bryozoa	Gymnolaemata	Cheilostomatida	Schizoporellidae	Schizoporella	japonica		species		Ortmann, 1890
	imerss.org:PMLS:3681			Count: some		Andy Lamb								PRESENT				Crisia spp.					iNaturalist:192680								Crisia							Animalia	Bryozoa	Stenolaemata	Cyclostomatida	Crisiidae	Crisia			genus
	imerss.org:PMLS:3791			Count: very many		Andy Lamb								PRESENT				Membranipora villosa					iNaturalist:360867								Membranipora villosa							Animalia	Bryozoa	Gymnolaemata	Cheilostomatida	Membraniporidae	Membranipora	villosa		species		Hincks, 1880
	imerss.org:PMLS:3792			Count: many		Andy Lamb								PRESENT				Schizoporella japonica					iNaturalist:519486								Schizoporella japonica							Animalia	Bryozoa	Gymnolaemata	Cheilostomatida	Schizoporellidae	Schizoporella	japonica		species		Ortmann, 1890
	imerss.org:PMLS:3793					Andy Lamb		1						PRESENT				Heteropora pacifica					iNaturalist:465163								Heteropora pacifica							Animalia	Bryozoa	Stenolaemata	Cyclostomatida	Heteroporidae	Heteropora	pacifica		species		Borg, 1933
	imerss.org:PMLS:3916			Count: very many		Andy Lamb								PRESENT				Membranipora villosa					iNaturalist:360867								Membranipora villosa							Animalia	Bryozoa	Gymnolaemata	Cheilostomatida	Membraniporidae	Membranipora	villosa		species		Hincks, 1880
	imerss.org:PMLS:3917			Count: some		Andy Lamb								PRESENT				Dendrobeania lichenoides					iNaturalist:339213								Dendrobeania lichenoides							Animalia	Bryozoa	Gymnolaemata	Cheilostomatida	Bugulidae	Dendrobeania	lichenoides		species		(Robertson, 1900)
	imerss.org:PMLS:3918			Count: some		Andy Lamb								PRESENT				Crisia spp.					iNaturalist:192680								Crisia							Animalia	Bryozoa	Stenolaemata	Cyclostomatida	Crisiidae	Crisia			genus
	imerss.org:PMLS:3919			Count: some		Andy Lamb								PRESENT				Diaperoforma californica					iNaturalist:345872								Diaperoforma californica							Animalia	Bryozoa	Stenolaemata	Cyclostomatida		Diaperoforma	californica		species		(d'Orbigny, 1853)
	imerss.org:PMLS:4002			Count: some		Andy Lamb								PRESENT				Schizoporella japonica					iNaturalist:519486								Schizoporella japonica							Animalia	Bryozoa	Gymnolaemata	Cheilostomatida	Schizoporellidae	Schizoporella	japonica		species		Ortmann, 1890
	imerss.org:PMLS:4003			Count: some		Andy Lamb								PRESENT				Crisia spp.					iNaturalist:192680								Crisia							Animalia	Bryozoa	Stenolaemata	Cyclostomatida	Crisiidae	Crisia			genus
	imerss.org:PMLS:4004			Count: some		Andy Lamb								PRESENT				Diaperoforma californica					iNaturalist:345872								Diaperoforma californica							Animalia	Bryozoa	Stenolaemata	Cyclostomatida		Diaperoforma	californica		species		(d'Orbigny, 1853)
	imerss.org:PMLS:4119			Count: some		Andy Lamb								PRESENT				Membranipora villosa					iNaturalist:360867								Membranipora villosa							Animalia	Bryozoa	Gymnolaemata	Cheilostomatida	Membraniporidae	Membranipora	villosa		species		Hincks, 1880
	imerss.org:PMLS:4120			Count: few		Andy Lamb								PRESENT				Bugulina californica					iNaturalist:551808								Bugulina californica							Animalia	Bryozoa	Gymnolaemata	Cheilostomatida	Bugulidae	Bugulina	californica		species		(Robertson, 1905)
	imerss.org:PMLS:4121			Count: some		Andy Lamb								PRESENT				Crisia spp.					iNaturalist:192680								Crisia							Animalia	Bryozoa	Stenolaemata	Cyclostomatida	Crisiidae	Crisia			genus
	imerss.org:PMLS:4122			Count: many		Andy Lamb								PRESENT				Diaperoforma californica					iNaturalist:345872								Diaperoforma californica							Animalia	Bryozoa	Stenolaemata	Cyclostomatida		Diaperoforma	californica		species		(d'Orbigny, 1853)
	imerss.org:PMLS:4229			Count: some		Andy Lamb								PRESENT				Membranipora villosa					iNaturalist:360867								Membranipora villosa							Animalia	Bryozoa	Gymnolaemata	Cheilostomatida	Membraniporidae	Membranipora	villosa		species		Hincks, 1880
	imerss.org:PMLS:4230			Count: some		Andy Lamb								PRESENT				Schizoporella japonica					iNaturalist:519486								Schizoporella japonica							Animalia	Bryozoa	Gymnolaemata	Cheilostomatida	Schizoporellidae	Schizoporella	japonica		species		Ortmann, 1890
	imerss.org:PMLS:4231			Count: few		Andy Lamb								PRESENT				Bowerbankia sp.					iNaturalist:195986								Amathia							Animalia	Bryozoa	Gymnolaemata	Ctenostomatida	Vesiculariidae	Amathia			genus
	imerss.org:PMLS:4232			Count: few		Andy Lamb								PRESENT				Bugulina californica					iNaturalist:551808								Bugulina californica							Animalia	Bryozoa	Gymnolaemata	Cheilostomatida	Bugulidae	Bugulina	californica		species		(Robertson, 1905)
	imerss.org:PMLS:4233			Count: many		Andy Lamb								PRESENT				Phidolopora pacifica					iNaturalist:51796								Phidolopora pacifica							Animalia	Bryozoa	Gymnolaemata	Cheilostomatida	Phidoloporidae	Phidolopora	pacifica		species		(Robertson, 1908)
	imerss.org:PMLS:4234			Count: many		Andy Lamb								PRESENT				Diaperoforma californica					iNaturalist:345872								Diaperoforma californica							Animalia	Bryozoa	Stenolaemata	Cyclostomatida		Diaperoforma	californica		species		(d'Orbigny, 1853)
	imerss.org:PMLS:4345					Andy Lamb		1						PRESENT				Cellaria diffusa					iNaturalist:196077								Cellaria diffusa							Animalia	Bryozoa	Gymnolaemata	Cheilostomatida	Cellariidae	Cellaria	diffusa		species		Robertson, 1905
	imerss.org:PMLS:4346					Andy Lamb		1						PRESENT				Heteropora pacifica					iNaturalist:465163								Heteropora pacifica							Animalia	Bryozoa	Stenolaemata	Cyclostomatida	Heteroporidae	Heteropora	pacifica		species		Borg, 1933
	imerss.org:PMLS:4347			Count: many		Andy Lamb								PRESENT				Diaperoforma californica					iNaturalist:345872								Diaperoforma californica							Animalia	Bryozoa	Stenolaemata	Cyclostomatida		Diaperoforma	californica		species		(d'Orbigny, 1853)
	imerss.org:PMLS:4429			Count: some		Charlie Gibbs								PRESENT				Crisia spp.					iNaturalist:192680								Crisia							Animalia	Bryozoa	Stenolaemata	Cyclostomatida	Crisiidae	Crisia			genus
	imerss.org:PMLS:4430			Count: few		Charlie Gibbs								PRESENT				Phidolopora pacifica					iNaturalist:51796								Phidolopora pacifica							Animalia	Bryozoa	Gymnolaemata	Cheilostomatida	Phidoloporidae	Phidolopora	pacifica		species		(Robertson, 1908)
	imerss.org:PMLS:4431			Count: some		Charlie Gibbs								PRESENT				Diaperoforma californica					iNaturalist:345872								Diaperoforma californica							Animalia	Bryozoa	Stenolaemata	Cyclostomatida		Diaperoforma	californica		species		(d'Orbigny, 1853)
	imerss.org:PMLS:4515			Count: some		Charlie Gibbs								PRESENT				Diaperoforma californica					iNaturalist:345872								Diaperoforma californica							Animalia	Bryozoa	Stenolaemata	Cyclostomatida		Diaperoforma	californica		species		(d'Orbigny, 1853)
	imerss.org:PMLS:4626			Count: few		Andy Lamb								PRESENT				Dendrobeania murrayana					iNaturalist:205170								Dendrobeania murrayana							Animalia	Bryozoa	Gymnolaemata	Cheilostomatida	Bugulidae	Dendrobeania	murrayana		species		(Bean in Johnston, 1847)
	imerss.org:PMLS:4627			Count: some		Andy Lamb								PRESENT				Dendrobeania lichenoides					iNaturalist:339213								Dendrobeania lichenoides							Animalia	Bryozoa	Gymnolaemata	Cheilostomatida	Bugulidae	Dendrobeania	lichenoides		species		(Robertson, 1900)
	imerss.org:PMLS:4628			Count: some		Andy Lamb								PRESENT				Crisia spp.					iNaturalist:192680								Crisia							Animalia	Bryozoa	Stenolaemata	Cyclostomatida	Crisiidae	Crisia			genus
	imerss.org:PMLS:4629			Count: some		Andy Lamb								PRESENT				Phidolopora pacifica					iNaturalist:51796								Phidolopora pacifica							Animalia	Bryozoa	Gymnolaemata	Cheilostomatida	Phidoloporidae	Phidolopora	pacifica		species		(Robertson, 1908)
	imerss.org:PMLS:4630			Count: very many		Andy Lamb								PRESENT				Diaperoforma californica					iNaturalist:345872								Diaperoforma californica							Animalia	Bryozoa	Stenolaemata	Cyclostomatida		Diaperoforma	californica		species		(d'Orbigny, 1853)
	imerss.org:PMLS:4739			Count: very many		Andy Lamb								PRESENT				Membranipora villosa					iNaturalist:360867								Membranipora villosa							Animalia	Bryozoa	Gymnolaemata	Cheilostomatida	Membraniporidae	Membranipora	villosa		species		Hincks, 1880
	imerss.org:PMLS:4740			Count: some		Andy Lamb								PRESENT				Crisia spp.					iNaturalist:192680								Crisia							Animalia	Bryozoa	Stenolaemata	Cyclostomatida	Crisiidae	Crisia			genus
	imerss.org:PMLS:4741			Count: few		Andy Lamb								PRESENT				Heteropora pacifica					iNaturalist:465163								Heteropora pacifica							Animalia	Bryozoa	Stenolaemata	Cyclostomatida	Heteroporidae	Heteropora	pacifica		species		Borg, 1933
	imerss.org:PMLS:4742			Count: many		Andy Lamb								PRESENT				Diaperoforma californica					iNaturalist:345872								Diaperoforma californica							Animalia	Bryozoa	Stenolaemata	Cyclostomatida		Diaperoforma	californica		species		(d'Orbigny, 1853)
	imerss.org:PMLS:4863			Count: many		Andy Lamb								PRESENT				Schizoporella japonica					iNaturalist:519486								Schizoporella japonica							Animalia	Bryozoa	Gymnolaemata	Cheilostomatida	Schizoporellidae	Schizoporella	japonica		species		Ortmann, 1890
	imerss.org:PMLS:4864			Count: very many		Andy Lamb								PRESENT				Crisia spp.					iNaturalist:192680								Crisia							Animalia	Bryozoa	Stenolaemata	Cyclostomatida	Crisiidae	Crisia			genus
	imerss.org:PMLS:4865			Count: very many		Andy Lamb								PRESENT				Diaperoforma californica					iNaturalist:345872								Diaperoforma californica							Animalia	Bryozoa	Stenolaemata	Cyclostomatida		Diaperoforma	californica		species		(d'Orbigny, 1853)
	imerss.org:PMLS:4965			Count: very many		Andy Lamb								PRESENT				Membranipora villosa					iNaturalist:360867								Membranipora villosa							Animalia	Bryozoa	Gymnolaemata	Cheilostomatida	Membraniporidae	Membranipora	villosa		species		Hincks, 1880
	imerss.org:PMLS:4966			Count: some		Andy Lamb								PRESENT				Schizoporella japonica					iNaturalist:519486								Schizoporella japonica							Animalia	Bryozoa	Gymnolaemata	Cheilostomatida	Schizoporellidae	Schizoporella	japonica		species		Ortmann, 1890
	imerss.org:PMLS:4967			Count: few		Andy Lamb								PRESENT				Diaperoforma californica					iNaturalist:345872								Diaperoforma californica							Animalia	Bryozoa	Stenolaemata	Cyclostomatida		Diaperoforma	californica		species		(d'Orbigny, 1853)
	imerss.org:PMLS:5056			Count: very many		Andy Lamb								PRESENT				Membranipora villosa					iNaturalist:360867								Membranipora villosa							Animalia	Bryozoa	Gymnolaemata	Cheilostomatida	Membraniporidae	Membranipora	villosa		species		Hincks, 1880
	imerss.org:PMLS:5057			Count: very many		Andy Lamb								PRESENT				Schizoporella japonica					iNaturalist:519486								Schizoporella japonica							Animalia	Bryozoa	Gymnolaemata	Cheilostomatida	Schizoporellidae	Schizoporella	japonica		species		Ortmann, 1890
	imerss.org:PMLS:5058			Count: some		Andy Lamb								PRESENT				Dendrobeania murrayana					iNaturalist:205170								Dendrobeania murrayana							Animalia	Bryozoa	Gymnolaemata	Cheilostomatida	Bugulidae	Dendrobeania	murrayana		species		(Bean in Johnston, 1847)
	imerss.org:PMLS:5059			Count: abundant		Andy Lamb								PRESENT				Crisia spp.					iNaturalist:192680								Crisia							Animalia	Bryozoa	Stenolaemata	Cyclostomatida	Crisiidae	Crisia			genus
	imerss.org:PMLS:5060					Andy Lamb		1						PRESENT				Phidolopora pacifica					iNaturalist:51796								Phidolopora pacifica							Animalia	Bryozoa	Gymnolaemata	Cheilostomatida	Phidoloporidae	Phidolopora	pacifica		species		(Robertson, 1908)
	imerss.org:PMLS:5061			Count: many		Andy Lamb								PRESENT				Diaperoforma californica					iNaturalist:345872								Diaperoforma californica							Animalia	Bryozoa	Stenolaemata	Cyclostomatida		Diaperoforma	californica		species		(d'Orbigny, 1853)
	imerss.org:PMLS:5198			Count: very many		Andy Lamb								PRESENT				Membranipora villosa					iNaturalist:360867								Membranipora villosa							Animalia	Bryozoa	Gymnolaemata	Cheilostomatida	Membraniporidae	Membranipora	villosa		species		Hincks, 1880
	imerss.org:PMLS:5199			Count: some		Andy Lamb								PRESENT				Schizoporella japonica					iNaturalist:519486								Schizoporella japonica							Animalia	Bryozoa	Gymnolaemata	Cheilostomatida	Schizoporellidae	Schizoporella	japonica		species		Ortmann, 1890
	imerss.org:PMLS:5200			Count: some		Andy Lamb								PRESENT				Crisia spp.					iNaturalist:192680								Crisia							Animalia	Bryozoa	Stenolaemata	Cyclostomatida	Crisiidae	Crisia			genus
	imerss.org:PMLS:5201			Count: very many		Andy Lamb								PRESENT				Diaperoforma californica					iNaturalist:345872								Diaperoforma californica							Animalia	Bryozoa	Stenolaemata	Cyclostomatida		Diaperoforma	californica		species		(d'Orbigny, 1853)
	imerss.org:PMLS:5299					Andy Lamb		1						PRESENT				Crisia spp.					iNaturalist:192680								Crisia							Animalia	Bryozoa	Stenolaemata	Cyclostomatida	Crisiidae	Crisia			genus
	imerss.org:PMLS:5300			Count: very many		Andy Lamb								PRESENT				Diaperoforma californica					iNaturalist:345872								Diaperoforma californica							Animalia	Bryozoa	Stenolaemata	Cyclostomatida		Diaperoforma	californica		species		(d'Orbigny, 1853)
	imerss.org:PMLS:5387			Count: some		Andy Lamb								PRESENT				Schizoporella japonica					iNaturalist:519486								Schizoporella japonica							Animalia	Bryozoa	Gymnolaemata	Cheilostomatida	Schizoporellidae	Schizoporella	japonica		species		Ortmann, 1890
	imerss.org:PMLS:5388			Count: few		Andy Lamb								PRESENT				Caulibugula californica					iNaturalist:802658								Caulibugula californica							Animalia	Bryozoa	Gymnolaemata	Cheilostomatida	Bugulidae	Caulibugula	californica		species		Robertson, 1905
	imerss.org:PMLS:5389			Count: abundant		Andy Lamb								PRESENT				Diaperoforma californica					iNaturalist:345872								Diaperoforma californica							Animalia	Bryozoa	Stenolaemata	Cyclostomatida		Diaperoforma	californica		species		(d'Orbigny, 1853)
	imerss.org:PMLS:5491			Count: few		Andy Lamb								PRESENT				Schizoporella japonica					iNaturalist:519486								Schizoporella japonica							Animalia	Bryozoa	Gymnolaemata	Cheilostomatida	Schizoporellidae	Schizoporella	japonica		species		Ortmann, 1890
	imerss.org:PMLS:5492			Count: some		Andy Lamb								PRESENT				Diaperoforma californica					iNaturalist:345872								Diaperoforma californica							Animalia	Bryozoa	Stenolaemata	Cyclostomatida		Diaperoforma	californica		species		(d'Orbigny, 1853)
	imerss.org:PMLS:5575			Count: many		Andy Lamb								PRESENT				Schizoporella japonica					iNaturalist:519486								Schizoporella japonica							Animalia	Bryozoa	Gymnolaemata	Cheilostomatida	Schizoporellidae	Schizoporella	japonica		species		Ortmann, 1890
	imerss.org:PMLS:5576			Count: abundant		Andy Lamb								PRESENT				Crisia spp.					iNaturalist:192680								Crisia							Animalia	Bryozoa	Stenolaemata	Cyclostomatida	Crisiidae	Crisia			genus
	imerss.org:PMLS:5577			Count: very many		Andy Lamb								PRESENT				Diaperoforma californica					iNaturalist:345872								Diaperoforma californica							Animalia	Bryozoa	Stenolaemata	Cyclostomatida		Diaperoforma	californica		species		(d'Orbigny, 1853)
	imerss.org:PMLS:5663			Count: some		Andy Lamb								PRESENT				Schizoporella japonica					iNaturalist:519486								Schizoporella japonica							Animalia	Bryozoa	Gymnolaemata	Cheilostomatida	Schizoporellidae	Schizoporella	japonica		species		Ortmann, 1890
	imerss.org:PMLS:5664			Count: few		Andy Lamb								PRESENT				Dendrobeania murrayana					iNaturalist:205170								Dendrobeania murrayana							Animalia	Bryozoa	Gymnolaemata	Cheilostomatida	Bugulidae	Dendrobeania	murrayana		species		(Bean in Johnston, 1847)
	imerss.org:PMLS:5665			Count: some		Andy Lamb								PRESENT				Crisia spp.					iNaturalist:192680								Crisia							Animalia	Bryozoa	Stenolaemata	Cyclostomatida	Crisiidae	Crisia			genus
	imerss.org:PMLS:5666			Count: many		Andy Lamb								PRESENT				Diaperoforma californica					iNaturalist:345872								Diaperoforma californica							Animalia	Bryozoa	Stenolaemata	Cyclostomatida		Diaperoforma	californica		species		(d'Orbigny, 1853)
	imerss.org:PMLS:5762			Count: few		Andy Lamb								PRESENT				Schizoporella japonica					iNaturalist:519486								Schizoporella japonica							Animalia	Bryozoa	Gymnolaemata	Cheilostomatida	Schizoporellidae	Schizoporella	japonica		species		Ortmann, 1890
	imerss.org:PMLS:5763			Count: few		Andy Lamb								PRESENT				Bugulina californica					iNaturalist:551808								Bugulina californica							Animalia	Bryozoa	Gymnolaemata	Cheilostomatida	Bugulidae	Bugulina	californica		species		(Robertson, 1905)
	imerss.org:PMLS:5764			Count: few		Andy Lamb								PRESENT				Crisia spp.					iNaturalist:192680								Crisia							Animalia	Bryozoa	Stenolaemata	Cyclostomatida	Crisiidae	Crisia			genus
	imerss.org:PMLS:5765			Count: few		Andy Lamb								PRESENT				Heteropora pacifica					iNaturalist:465163								Heteropora pacifica							Animalia	Bryozoa	Stenolaemata	Cyclostomatida	Heteroporidae	Heteropora	pacifica		species		Borg, 1933
	imerss.org:PMLS:5766			Count: some		Andy Lamb								PRESENT				Diaperoforma californica					iNaturalist:345872								Diaperoforma californica							Animalia	Bryozoa	Stenolaemata	Cyclostomatida		Diaperoforma	californica		species		(d'Orbigny, 1853)
	imerss.org:PMLS:5862			Count: some		Andy Lamb								PRESENT				Schizoporella japonica					iNaturalist:519486								Schizoporella japonica							Animalia	Bryozoa	Gymnolaemata	Cheilostomatida	Schizoporellidae	Schizoporella	japonica		species		Ortmann, 1890
	imerss.org:PMLS:5863			Count: some		Andy Lamb								PRESENT				Cellaria diffusa					iNaturalist:196077								Cellaria diffusa							Animalia	Bryozoa	Gymnolaemata	Cheilostomatida	Cellariidae	Cellaria	diffusa		species		Robertson, 1905
	imerss.org:PMLS:5864			Count: very many		Andy Lamb								PRESENT				Diaperoforma californica					iNaturalist:345872								Diaperoforma californica							Animalia	Bryozoa	Stenolaemata	Cyclostomatida		Diaperoforma	californica		species		(d'Orbigny, 1853)
	imerss.org:PMLS:5992			Count: some		Andy Lamb								PRESENT				Crisia spp.					iNaturalist:192680								Crisia							Animalia	Bryozoa	Stenolaemata	Cyclostomatida	Crisiidae	Crisia			genus
	imerss.org:PMLS:5993			Count: some		Andy Lamb								PRESENT				Heteropora pacifica					iNaturalist:465163								Heteropora pacifica							Animalia	Bryozoa	Stenolaemata	Cyclostomatida	Heteroporidae	Heteropora	pacifica		species		Borg, 1933
	imerss.org:PMLS:6092			Count: some		Andy Lamb								PRESENT				Bugulina californica					iNaturalist:551808								Bugulina californica							Animalia	Bryozoa	Gymnolaemata	Cheilostomatida	Bugulidae	Bugulina	californica		species		(Robertson, 1905)
	imerss.org:PMLS:6093			Count: some		Andy Lamb								PRESENT				Crisia spp.					iNaturalist:192680								Crisia							Animalia	Bryozoa	Stenolaemata	Cyclostomatida	Crisiidae	Crisia			genus
	imerss.org:PMLS:6094			Count: many		Andy Lamb								PRESENT				Diaperoforma californica					iNaturalist:345872								Diaperoforma californica							Animalia	Bryozoa	Stenolaemata	Cyclostomatida		Diaperoforma	californica		species		(d'Orbigny, 1853)
	imerss.org:PMLS:6211			Count: some		Andy Lamb								PRESENT				Crisia spp.					iNaturalist:192680								Crisia							Animalia	Bryozoa	Stenolaemata	Cyclostomatida	Crisiidae	Crisia			genus
	imerss.org:PMLS:6212			Count: few		Andy Lamb								PRESENT				Heteropora pacifica					iNaturalist:465163								Heteropora pacifica							Animalia	Bryozoa	Stenolaemata	Cyclostomatida	Heteroporidae	Heteropora	pacifica		species		Borg, 1933
	imerss.org:PMLS:6213			Count: very many		Andy Lamb								PRESENT				Diaperoforma californica					iNaturalist:345872								Diaperoforma californica							Animalia	Bryozoa	Stenolaemata	Cyclostomatida		Diaperoforma	californica		species		(d'Orbigny, 1853)
	imerss.org:PMLS:6302			Count: some		Andy Lamb								PRESENT				Schizoporella japonica					iNaturalist:519486								Schizoporella japonica							Animalia	Bryozoa	Gymnolaemata	Cheilostomatida	Schizoporellidae	Schizoporella	japonica		species		Ortmann, 1890
	imerss.org:PMLS:6303			Count: some		Andy Lamb								PRESENT				Crisia spp.					iNaturalist:192680								Crisia							Animalia	Bryozoa	Stenolaemata	Cyclostomatida	Crisiidae	Crisia			genus
	imerss.org:PMLS:6304			Count: few		Andy Lamb								PRESENT				Heteropora pacifica					iNaturalist:465163								Heteropora pacifica							Animalia	Bryozoa	Stenolaemata	Cyclostomatida	Heteroporidae	Heteropora	pacifica		species		Borg, 1933
	imerss.org:PMLS:6305			Count: very many		Andy Lamb								PRESENT				Diaperoforma californica					iNaturalist:345872								Diaperoforma californica							Animalia	Bryozoa	Stenolaemata	Cyclostomatida		Diaperoforma	californica		species		(d'Orbigny, 1853)
	imerss.org:PMLS:6398			Count: some		Andy Lamb								PRESENT				Schizoporella japonica					iNaturalist:519486								Schizoporella japonica							Animalia	Bryozoa	Gymnolaemata	Cheilostomatida	Schizoporellidae	Schizoporella	japonica		species		Ortmann, 1890
	imerss.org:PMLS:6399			Count: few		Andy Lamb								PRESENT				Bugulina californica					iNaturalist:551808								Bugulina californica							Animalia	Bryozoa	Gymnolaemata	Cheilostomatida	Bugulidae	Bugulina	californica		species		(Robertson, 1905)
	imerss.org:PMLS:6400			Count: very many		Andy Lamb								PRESENT				Diaperoforma californica					iNaturalist:345872								Diaperoforma californica							Animalia	Bryozoa	Stenolaemata	Cyclostomatida		Diaperoforma	californica		species		(d'Orbigny, 1853)
	imerss.org:PMLS:6497			Count: very many		Andy Lamb								PRESENT				Heteropora pacifica					iNaturalist:465163								Heteropora pacifica							Animalia	Bryozoa	Stenolaemata	Cyclostomatida	Heteroporidae	Heteropora	pacifica		species		Borg, 1933
	imerss.org:PMLS:6498			Count: some		Andy Lamb								PRESENT				Diaperoforma californica					iNaturalist:345872								Diaperoforma californica							Animalia	Bryozoa	Stenolaemata	Cyclostomatida		Diaperoforma	californica		species		(d'Orbigny, 1853)
	imerss.org:PMLS:6574			Count: very many		Andy Lamb								PRESENT				Diaperoforma californica					iNaturalist:345872								Diaperoforma californica							Animalia	Bryozoa	Stenolaemata	Cyclostomatida		Diaperoforma	californica		species		(d'Orbigny, 1853)
	imerss.org:PMLS:6663			Count: some		Andy Lamb								PRESENT				Schizoporella japonica					iNaturalist:519486								Schizoporella japonica							Animalia	Bryozoa	Gymnolaemata	Cheilostomatida	Schizoporellidae	Schizoporella	japonica		species		Ortmann, 1890
	imerss.org:PMLS:6664			Count: few		Andy Lamb								PRESENT				Dendrobeania murrayana					iNaturalist:205170								Dendrobeania murrayana							Animalia	Bryozoa	Gymnolaemata	Cheilostomatida	Bugulidae	Dendrobeania	murrayana		species		(Bean in Johnston, 1847)
	imerss.org:PMLS:6665			Count: some		Andy Lamb								PRESENT				Crisia spp.					iNaturalist:192680								Crisia							Animalia	Bryozoa	Stenolaemata	Cyclostomatida	Crisiidae	Crisia			genus
	imerss.org:PMLS:6666			Count: some		Andy Lamb								PRESENT				Heteropora pacifica					iNaturalist:465163								Heteropora pacifica							Animalia	Bryozoa	Stenolaemata	Cyclostomatida	Heteroporidae	Heteropora	pacifica		species		Borg, 1933
	imerss.org:PMLS:6667			Count: some		Andy Lamb								PRESENT				Diaperoforma californica					iNaturalist:345872								Diaperoforma californica							Animalia	Bryozoa	Stenolaemata	Cyclostomatida		Diaperoforma	californica		species		(d'Orbigny, 1853)
	imerss.org:PMLS:6764			Count: some		Andy Lamb								PRESENT				Disporella separata					iNaturalist:465160								Disporella separata							Animalia	Bryozoa	Stenolaemata	Cyclostomatida	Lichenoporidae	Disporella	separata		species		Osburn, 1953
	imerss.org:PMLS:6765			Count: some		Andy Lamb								PRESENT				Crisia spp.					iNaturalist:192680								Crisia							Animalia	Bryozoa	Stenolaemata	Cyclostomatida	Crisiidae	Crisia			genus
	imerss.org:PMLS:6766			Count: very many		Andy Lamb								PRESENT				Heteropora pacifica					iNaturalist:465163								Heteropora pacifica							Animalia	Bryozoa	Stenolaemata	Cyclostomatida	Heteroporidae	Heteropora	pacifica		species		Borg, 1933
	imerss.org:PMLS:6767			Count: very many		Andy Lamb								PRESENT				Diaperoforma californica					iNaturalist:345872								Diaperoforma californica							Animalia	Bryozoa	Stenolaemata	Cyclostomatida		Diaperoforma	californica		species		(d'Orbigny, 1853)
	imerss.org:PMLS:6873			Count: very many		Andy Lamb								PRESENT				Dendrobeania murrayana					iNaturalist:205170								Dendrobeania murrayana							Animalia	Bryozoa	Gymnolaemata	Cheilostomatida	Bugulidae	Dendrobeania	murrayana		species		(Bean in Johnston, 1847)
	imerss.org:PMLS:6874			Count: some		Andy Lamb								PRESENT				Crisia spp.					iNaturalist:192680								Crisia							Animalia	Bryozoa	Stenolaemata	Cyclostomatida	Crisiidae	Crisia			genus
	imerss.org:PMLS:6875					Andy Lamb		1						PRESENT				Phidolopora pacifica					iNaturalist:51796								Phidolopora pacifica							Animalia	Bryozoa	Gymnolaemata	Cheilostomatida	Phidoloporidae	Phidolopora	pacifica		species		(Robertson, 1908)
	imerss.org:PMLS:6876			Count: many		Andy Lamb								PRESENT				Heteropora pacifica					iNaturalist:465163								Heteropora pacifica							Animalia	Bryozoa	Stenolaemata	Cyclostomatida	Heteroporidae	Heteropora	pacifica		species		Borg, 1933
	imerss.org:PMLS:6877			Count: many		Andy Lamb								PRESENT				Diaperoforma californica					iNaturalist:345872								Diaperoforma californica							Animalia	Bryozoa	Stenolaemata	Cyclostomatida		Diaperoforma	californica		species		(d'Orbigny, 1853)
	imerss.org:PMLS:6997			Count: very many		Andy Lamb								PRESENT				Membranipora villosa					iNaturalist:360867								Membranipora villosa							Animalia	Bryozoa	Gymnolaemata	Cheilostomatida	Membraniporidae	Membranipora	villosa		species		Hincks, 1880
	imerss.org:PMLS:6998			Count: few		Andy Lamb								PRESENT				Schizoporella japonica					iNaturalist:519486								Schizoporella japonica							Animalia	Bryozoa	Gymnolaemata	Cheilostomatida	Schizoporellidae	Schizoporella	japonica		species		Ortmann, 1890
	imerss.org:PMLS:6999			Count: some		Andy Lamb								PRESENT				Bugulina californica					iNaturalist:551808								Bugulina californica							Animalia	Bryozoa	Gymnolaemata	Cheilostomatida	Bugulidae	Bugulina	californica		species		(Robertson, 1905)
	imerss.org:PMLS:7000			Count: few		Andy Lamb								PRESENT				Dendrobeania murrayana					iNaturalist:205170								Dendrobeania murrayana							Animalia	Bryozoa	Gymnolaemata	Cheilostomatida	Bugulidae	Dendrobeania	murrayana		species		(Bean in Johnston, 1847)
	imerss.org:PMLS:7001			Count: some		Andy Lamb								PRESENT				Crisia spp.					iNaturalist:192680								Crisia							Animalia	Bryozoa	Stenolaemata	Cyclostomatida	Crisiidae	Crisia			genus
	imerss.org:PMLS:7002			Count: few		Andy Lamb								PRESENT				Phidolopora pacifica					iNaturalist:51796								Phidolopora pacifica							Animalia	Bryozoa	Gymnolaemata	Cheilostomatida	Phidoloporidae	Phidolopora	pacifica		species		(Robertson, 1908)
	imerss.org:PMLS:7003			Count: few		Andy Lamb								PRESENT				Heteropora pacifica					iNaturalist:465163								Heteropora pacifica							Animalia	Bryozoa	Stenolaemata	Cyclostomatida	Heteroporidae	Heteropora	pacifica		species		Borg, 1933
	imerss.org:PMLS:7004			Count: some		Andy Lamb								PRESENT				Diaperoforma californica					iNaturalist:345872								Diaperoforma californica							Animalia	Bryozoa	Stenolaemata	Cyclostomatida		Diaperoforma	californica		species		(d'Orbigny, 1853)
	imerss.org:PMLS:7130			Count: very many		Andy Lamb								PRESENT				Membranipora villosa					iNaturalist:360867								Membranipora villosa							Animalia	Bryozoa	Gymnolaemata	Cheilostomatida	Membraniporidae	Membranipora	villosa		species		Hincks, 1880
	imerss.org:PMLS:7131			Count: few		Andy Lamb								PRESENT				Bugulina californica					iNaturalist:551808								Bugulina californica							Animalia	Bryozoa	Gymnolaemata	Cheilostomatida	Bugulidae	Bugulina	californica		species		(Robertson, 1905)
	imerss.org:PMLS:7132			Count: many		Andy Lamb								PRESENT				Dendrobeania murrayana					iNaturalist:205170								Dendrobeania murrayana							Animalia	Bryozoa	Gymnolaemata	Cheilostomatida	Bugulidae	Dendrobeania	murrayana		species		(Bean in Johnston, 1847)
	imerss.org:PMLS:7133			Count: some		Andy Lamb								PRESENT				Diaperoforma californica					iNaturalist:345872								Diaperoforma californica							Animalia	Bryozoa	Stenolaemata	Cyclostomatida		Diaperoforma	californica		species		(d'Orbigny, 1853)
	imerss.org:PMLS:7222			Count: abundant		Andy Lamb								PRESENT				Membranipora villosa					iNaturalist:360867								Membranipora villosa							Animalia	Bryozoa	Gymnolaemata	Cheilostomatida	Membraniporidae	Membranipora	villosa		species		Hincks, 1880
	imerss.org:PMLS:7223			Count: very many		Andy Lamb								PRESENT				Dendrobeania murrayana					iNaturalist:205170								Dendrobeania murrayana							Animalia	Bryozoa	Gymnolaemata	Cheilostomatida	Bugulidae	Dendrobeania	murrayana		species		(Bean in Johnston, 1847)
	imerss.org:PMLS:7290			Count: many		Andy Lamb								PRESENT				Schizoporella japonica					iNaturalist:519486								Schizoporella japonica							Animalia	Bryozoa	Gymnolaemata	Cheilostomatida	Schizoporellidae	Schizoporella	japonica		species		Ortmann, 1890
	imerss.org:PMLS:7291			Count: very many		Andy Lamb								PRESENT				Diaperoforma californica					iNaturalist:345872								Diaperoforma californica							Animalia	Bryozoa	Stenolaemata	Cyclostomatida		Diaperoforma	californica		species		(d'Orbigny, 1853)
	imerss.org:PMLS:7411			Count: some		Andy Lamb								PRESENT				Membranipora villosa					iNaturalist:360867								Membranipora villosa							Animalia	Bryozoa	Gymnolaemata	Cheilostomatida	Membraniporidae	Membranipora	villosa		species		Hincks, 1880
	imerss.org:PMLS:7412			Count: very many		Andy Lamb								PRESENT				Bugulina californica					iNaturalist:551808								Bugulina californica							Animalia	Bryozoa	Gymnolaemata	Cheilostomatida	Bugulidae	Bugulina	californica		species		(Robertson, 1905)
	imerss.org:PMLS:7413			Count: few		Andy Lamb								PRESENT				Dendrobeania murrayana					iNaturalist:205170								Dendrobeania murrayana							Animalia	Bryozoa	Gymnolaemata	Cheilostomatida	Bugulidae	Dendrobeania	murrayana		species		(Bean in Johnston, 1847)
	imerss.org:PMLS:7414			Count: some		Andy Lamb								PRESENT				Diaperoforma californica					iNaturalist:345872								Diaperoforma californica							Animalia	Bryozoa	Stenolaemata	Cyclostomatida		Diaperoforma	californica		species		(d'Orbigny, 1853)
	imerss.org:PMLS:7524			Count: very many		Andy Lamb								PRESENT				Bugulina californica					iNaturalist:551808								Bugulina californica							Animalia	Bryozoa	Gymnolaemata	Cheilostomatida	Bugulidae	Bugulina	californica		species		(Robertson, 1905)
	imerss.org:PMLS:7525			Count: few		Andy Lamb								PRESENT				Crisia spp.					iNaturalist:192680								Crisia							Animalia	Bryozoa	Stenolaemata	Cyclostomatida	Crisiidae	Crisia			genus
	imerss.org:PMLS:7625			Count: some		Andy Lamb								PRESENT				Membranipora villosa					iNaturalist:360867								Membranipora villosa							Animalia	Bryozoa	Gymnolaemata	Cheilostomatida	Membraniporidae	Membranipora	villosa		species		Hincks, 1880
	imerss.org:PMLS:7626			Count: many		Andy Lamb								PRESENT				Schizoporella japonica					iNaturalist:519486								Schizoporella japonica							Animalia	Bryozoa	Gymnolaemata	Cheilostomatida	Schizoporellidae	Schizoporella	japonica		species		Ortmann, 1890
	imerss.org:PMLS:7627			Count: many		Andy Lamb								PRESENT				Bugulina californica					iNaturalist:551808								Bugulina californica							Animalia	Bryozoa	Gymnolaemata	Cheilostomatida	Bugulidae	Bugulina	californica		species		(Robertson, 1905)
	imerss.org:PMLS:7628			Count: few		Andy Lamb								PRESENT				Heteropora alaskensis					iNaturalist:873902								Heteropora alaskensis							Animalia	Bryozoa	Stenolaemata	Cyclostomatida	Heteroporidae	Heteropora	alaskensis		species		Borg, 1933
	imerss.org:PMLS:7629			Count: some		Andy Lamb								PRESENT				Diaperoforma californica					iNaturalist:345872								Diaperoforma californica							Animalia	Bryozoa	Stenolaemata	Cyclostomatida		Diaperoforma	californica		species		(d'Orbigny, 1853)
	imerss.org:PMLS:7727			Count: some		Andy Lamb								PRESENT				Bugulina californica					iNaturalist:551808								Bugulina californica							Animalia	Bryozoa	Gymnolaemata	Cheilostomatida	Bugulidae	Bugulina	californica		species		(Robertson, 1905)
	imerss.org:PMLS:7728			Count: some		Andy Lamb								PRESENT				Crisia spp.					iNaturalist:192680								Crisia							Animalia	Bryozoa	Stenolaemata	Cyclostomatida	Crisiidae	Crisia			genus
	imerss.org:PMLS:7729			Count: few		Andy Lamb								PRESENT				Heteropora pacifica					iNaturalist:465163								Heteropora pacifica							Animalia	Bryozoa	Stenolaemata	Cyclostomatida	Heteroporidae	Heteropora	pacifica		species		Borg, 1933
	imerss.org:PMLS:7730			Count: very many		Andy Lamb								PRESENT				Diaperoforma californica					iNaturalist:345872								Diaperoforma californica							Animalia	Bryozoa	Stenolaemata	Cyclostomatida		Diaperoforma	californica		species		(d'Orbigny, 1853)
	imerss.org:PMLS:7832			Count: some		Andy Lamb								PRESENT				Membranipora villosa					iNaturalist:360867								Membranipora villosa							Animalia	Bryozoa	Gymnolaemata	Cheilostomatida	Membraniporidae	Membranipora	villosa		species		Hincks, 1880
	imerss.org:PMLS:7833			Count: some		Andy Lamb								PRESENT				Heteropora pacifica					iNaturalist:465163								Heteropora pacifica							Animalia	Bryozoa	Stenolaemata	Cyclostomatida	Heteroporidae	Heteropora	pacifica		species		Borg, 1933
	imerss.org:PMLS:7922			Count: few		Andy Lamb								PRESENT				Dendrobeania murrayana					iNaturalist:205170								Dendrobeania murrayana							Animalia	Bryozoa	Gymnolaemata	Cheilostomatida	Bugulidae	Dendrobeania	murrayana		species		(Bean in Johnston, 1847)
	imerss.org:PMLS:7923			Count: few		Andy Lamb								PRESENT				Crisia spp.					iNaturalist:192680								Crisia							Animalia	Bryozoa	Stenolaemata	Cyclostomatida	Crisiidae	Crisia			genus
	imerss.org:PMLS:7924			Count: some		Andy Lamb								PRESENT				Cellaria diffusa					iNaturalist:196077								Cellaria diffusa							Animalia	Bryozoa	Gymnolaemata	Cheilostomatida	Cellariidae	Cellaria	diffusa		species		Robertson, 1905
	imerss.org:PMLS:7925			Count: few		Andy Lamb								PRESENT				Heteropora pacifica					iNaturalist:465163								Heteropora pacifica							Animalia	Bryozoa	Stenolaemata	Cyclostomatida	Heteroporidae	Heteropora	pacifica		species		Borg, 1933
	imerss.org:PMLS:7926			Count: some		Andy Lamb								PRESENT				Heteropora alaskensis					iNaturalist:873902								Heteropora alaskensis							Animalia	Bryozoa	Stenolaemata	Cyclostomatida	Heteroporidae	Heteropora	alaskensis		species		Borg, 1933
	imerss.org:PMLS:8029			Count: many		Andy Lamb								PRESENT				Schizoporella japonica					iNaturalist:519486								Schizoporella japonica							Animalia	Bryozoa	Gymnolaemata	Cheilostomatida	Schizoporellidae	Schizoporella	japonica		species		Ortmann, 1890
	imerss.org:PMLS:8030			Count: few		Andy Lamb								PRESENT				Bugulina californica					iNaturalist:551808								Bugulina californica							Animalia	Bryozoa	Gymnolaemata	Cheilostomatida	Bugulidae	Bugulina	californica		species		(Robertson, 1905)
	imerss.org:PMLS:8031			Count: some		Andy Lamb								PRESENT				Dendrobeania murrayana					iNaturalist:205170								Dendrobeania murrayana							Animalia	Bryozoa	Gymnolaemata	Cheilostomatida	Bugulidae	Dendrobeania	murrayana		species		(Bean in Johnston, 1847)
	imerss.org:PMLS:8032			Count: some		Andy Lamb								PRESENT				Dendrobeania lichenoides					iNaturalist:339213								Dendrobeania lichenoides							Animalia	Bryozoa	Gymnolaemata	Cheilostomatida	Bugulidae	Dendrobeania	lichenoides		species		(Robertson, 1900)
	imerss.org:PMLS:8033			Count: few		Andy Lamb								PRESENT				Crisia spp.					iNaturalist:192680								Crisia							Animalia	Bryozoa	Stenolaemata	Cyclostomatida	Crisiidae	Crisia			genus
	imerss.org:PMLS:8034			Count: very many		Andy Lamb								PRESENT				Diaperoforma californica					iNaturalist:345872								Diaperoforma californica							Animalia	Bryozoa	Stenolaemata	Cyclostomatida		Diaperoforma	californica		species		(d'Orbigny, 1853)
	imerss.org:PMLS:8128			Count: some		Andy Lamb								PRESENT				Schizoporella japonica					iNaturalist:519486								Schizoporella japonica							Animalia	Bryozoa	Gymnolaemata	Cheilostomatida	Schizoporellidae	Schizoporella	japonica		species		Ortmann, 1890
	imerss.org:PMLS:8129			Count: very many		Andy Lamb								PRESENT				Diaperoforma californica					iNaturalist:345872								Diaperoforma californica							Animalia	Bryozoa	Stenolaemata	Cyclostomatida		Diaperoforma	californica		species		(d'Orbigny, 1853)
	imerss.org:PMLS:8226			Count: some		Andy Lamb								PRESENT				Diaperoforma californica					iNaturalist:345872								Diaperoforma californica							Animalia	Bryozoa	Stenolaemata	Cyclostomatida		Diaperoforma	californica		species		(d'Orbigny, 1853)
	imerss.org:PMLS:8312			Count: some		Andy Lamb								PRESENT				Heteropora pacifica					iNaturalist:465163								Heteropora pacifica							Animalia	Bryozoa	Stenolaemata	Cyclostomatida	Heteroporidae	Heteropora	pacifica		species		Borg, 1933
	imerss.org:PMLS:8313			Count: very many		Andy Lamb								PRESENT				Diaperoforma californica					iNaturalist:345872								Diaperoforma californica							Animalia	Bryozoa	Stenolaemata	Cyclostomatida		Diaperoforma	californica		species		(d'Orbigny, 1853)
	imerss.org:PMLS:8492			Count: some		Andy Lamb								PRESENT				Dendrobeania murrayana					iNaturalist:205170								Dendrobeania murrayana							Animalia	Bryozoa	Gymnolaemata	Cheilostomatida	Bugulidae	Dendrobeania	murrayana		species		(Bean in Johnston, 1847)
	imerss.org:PMLS:8493			Count: very many		Andy Lamb								PRESENT				Diaperoforma californica					iNaturalist:345872								Diaperoforma californica							Animalia	Bryozoa	Stenolaemata	Cyclostomatida		Diaperoforma	californica		species		(d'Orbigny, 1853)
	imerss.org:PMLS:8587			Count: many		Andy Lamb								PRESENT				Diaperoforma californica					iNaturalist:345872								Diaperoforma californica							Animalia	Bryozoa	Stenolaemata	Cyclostomatida		Diaperoforma	californica		species		(d'Orbigny, 1853)
	imerss.org:PMLS:8675			Count: some		Andy Lamb								PRESENT				Bugulina californica					iNaturalist:551808								Bugulina californica							Animalia	Bryozoa	Gymnolaemata	Cheilostomatida	Bugulidae	Bugulina	californica		species		(Robertson, 1905)
	imerss.org:PMLS:8676			Count: some		Andy Lamb								PRESENT				Crisia spp.					iNaturalist:192680								Crisia							Animalia	Bryozoa	Stenolaemata	Cyclostomatida	Crisiidae	Crisia			genus
	imerss.org:PMLS:8677			Count: some		Andy Lamb								PRESENT				Diaperoforma californica					iNaturalist:345872								Diaperoforma californica							Animalia	Bryozoa	Stenolaemata	Cyclostomatida		Diaperoforma	californica		species		(d'Orbigny, 1853)
	imerss.org:PMLS:8770			Count: few		Andy Lamb								PRESENT				Heteropora pacifica					iNaturalist:465163								Heteropora pacifica							Animalia	Bryozoa	Stenolaemata	Cyclostomatida	Heteroporidae	Heteropora	pacifica		species		Borg, 1933
	imerss.org:PMLS:8771			Count: some		Andy Lamb								PRESENT				Diaperoforma californica					iNaturalist:345872								Diaperoforma californica							Animalia	Bryozoa	Stenolaemata	Cyclostomatida		Diaperoforma	californica		species		(d'Orbigny, 1853)
	imerss.org:PMLS:8851			Count: some		Andy Lamb								PRESENT				Schizoporella japonica					iNaturalist:519486								Schizoporella japonica							Animalia	Bryozoa	Gymnolaemata	Cheilostomatida	Schizoporellidae	Schizoporella	japonica		species		Ortmann, 1890
	imerss.org:PMLS:8852			Count: very many		Andy Lamb								PRESENT				Crisia spp.					iNaturalist:192680								Crisia							Animalia	Bryozoa	Stenolaemata	Cyclostomatida	Crisiidae	Crisia			genus
	imerss.org:PMLS:8853			Count: many		Andy Lamb								PRESENT				Heteropora pacifica					iNaturalist:465163								Heteropora pacifica							Animalia	Bryozoa	Stenolaemata	Cyclostomatida	Heteroporidae	Heteropora	pacifica		species		Borg, 1933
	imerss.org:PMLS:8854			Count: very many		Andy Lamb								PRESENT				Diaperoforma californica					iNaturalist:345872								Diaperoforma californica							Animalia	Bryozoa	Stenolaemata	Cyclostomatida		Diaperoforma	californica		species		(d'Orbigny, 1853)
	imerss.org:PMLS:8932			Count: some		Andy Lamb								PRESENT				Heteropora pacifica					iNaturalist:465163								Heteropora pacifica							Animalia	Bryozoa	Stenolaemata	Cyclostomatida	Heteroporidae	Heteropora	pacifica		species		Borg, 1933
	imerss.org:PMLS:8933			Count: very many		Andy Lamb								PRESENT				Diaperoforma californica					iNaturalist:345872								Diaperoforma californica							Animalia	Bryozoa	Stenolaemata	Cyclostomatida		Diaperoforma	californica		species		(d'Orbigny, 1853)
	imerss.org:PMLS:9006			Count: few		Andy Lamb								PRESENT				Dendrobeania murrayana					iNaturalist:205170								Dendrobeania murrayana							Animalia	Bryozoa	Gymnolaemata	Cheilostomatida	Bugulidae	Dendrobeania	murrayana		species		(Bean in Johnston, 1847)
	imerss.org:PMLS:9007			Count: abundant		Andy Lamb								PRESENT				Diaperoforma californica					iNaturalist:345872								Diaperoforma californica							Animalia	Bryozoa	Stenolaemata	Cyclostomatida		Diaperoforma	californica		species		(d'Orbigny, 1853)
	imerss.org:PMLS:9094			Count: few		Andy Lamb								PRESENT				Dendrobeania murrayana					iNaturalist:205170								Dendrobeania murrayana							Animalia	Bryozoa	Gymnolaemata	Cheilostomatida	Bugulidae	Dendrobeania	murrayana		species		(Bean in Johnston, 1847)
	imerss.org:PMLS:9095			Count: many		Andy Lamb								PRESENT				Diaperoforma californica					iNaturalist:345872								Diaperoforma californica							Animalia	Bryozoa	Stenolaemata	Cyclostomatida		Diaperoforma	californica		species		(d'Orbigny, 1853)
	imerss.org:PMLS:9182			Count: many		Andy Lamb								PRESENT				Crisia spp.					iNaturalist:192680								Crisia							Animalia	Bryozoa	Stenolaemata	Cyclostomatida	Crisiidae	Crisia			genus
	imerss.org:PMLS:9332			Count: some		Andy Lamb								PRESENT				Crisia spp.					iNaturalist:192680								Crisia							Animalia	Bryozoa	Stenolaemata	Cyclostomatida	Crisiidae	Crisia			genus
	imerss.org:PMLS:9333			Count: many		Andy Lamb								PRESENT				Diaperoforma californica					iNaturalist:345872								Diaperoforma californica							Animalia	Bryozoa	Stenolaemata	Cyclostomatida		Diaperoforma	californica		species		(d'Orbigny, 1853)
	imerss.org:PMLS:9427			Count: few		Andy Lamb								PRESENT				Schizoporella japonica					iNaturalist:519486								Schizoporella japonica							Animalia	Bryozoa	Gymnolaemata	Cheilostomatida	Schizoporellidae	Schizoporella	japonica		species		Ortmann, 1890
	imerss.org:PMLS:9428			Count: few		Andy Lamb								PRESENT				Crisia spp.					iNaturalist:192680								Crisia							Animalia	Bryozoa	Stenolaemata	Cyclostomatida	Crisiidae	Crisia			genus
	imerss.org:PMLS:9429					Andy Lamb		1						PRESENT				Heteropora pacifica					iNaturalist:465163								Heteropora pacifica							Animalia	Bryozoa	Stenolaemata	Cyclostomatida	Heteroporidae	Heteropora	pacifica		species		Borg, 1933
	imerss.org:PMLS:9430			Count: abundant		Andy Lamb								PRESENT				Diaperoforma californica					iNaturalist:345872								Diaperoforma californica							Animalia	Bryozoa	Stenolaemata	Cyclostomatida		Diaperoforma	californica		species		(d'Orbigny, 1853)
	imerss.org:PMLS:9537			Count: few		Andy Lamb								PRESENT				Bugulina californica					iNaturalist:551808								Bugulina californica							Animalia	Bryozoa	Gymnolaemata	Cheilostomatida	Bugulidae	Bugulina	californica		species		(Robertson, 1905)
	imerss.org:PMLS:9538			Count: many		Andy Lamb								PRESENT				Dendrobeania murrayana					iNaturalist:205170								Dendrobeania murrayana							Animalia	Bryozoa	Gymnolaemata	Cheilostomatida	Bugulidae	Dendrobeania	murrayana		species		(Bean in Johnston, 1847)
	imerss.org:PMLS:9539			Count: few		Andy Lamb								PRESENT				Crisia spp.					iNaturalist:192680								Crisia							Animalia	Bryozoa	Stenolaemata	Cyclostomatida	Crisiidae	Crisia			genus
	imerss.org:PMLS:9652			Count: abundant		Andy Lamb								PRESENT				Dendrobeania murrayana					iNaturalist:205170								Dendrobeania murrayana							Animalia	Bryozoa	Gymnolaemata	Cheilostomatida	Bugulidae	Dendrobeania	murrayana		species		(Bean in Johnston, 1847)
	imerss.org:PMLS:9653			Count: very many		Andy Lamb								PRESENT				Diaperoforma californica					iNaturalist:345872								Diaperoforma californica							Animalia	Bryozoa	Stenolaemata	Cyclostomatida		Diaperoforma	californica		species		(d'Orbigny, 1853)
	imerss.org:PMLS:9769			Count: many		Andy Lamb								PRESENT				Schizoporella japonica					iNaturalist:519486								Schizoporella japonica							Animalia	Bryozoa	Gymnolaemata	Cheilostomatida	Schizoporellidae	Schizoporella	japonica		species		Ortmann, 1890
	imerss.org:PMLS:9770			Count: very many		Andy Lamb								PRESENT				Diaperoforma californica					iNaturalist:345872								Diaperoforma californica							Animalia	Bryozoa	Stenolaemata	Cyclostomatida		Diaperoforma	californica		species		(d'Orbigny, 1853)
	imerss.org:PMLS:9890			Count: many		Andy Lamb								PRESENT				Schizoporella japonica					iNaturalist:519486								Schizoporella japonica							Animalia	Bryozoa	Gymnolaemata	Cheilostomatida	Schizoporellidae	Schizoporella	japonica		species		Ortmann, 1890
	imerss.org:PMLS:9891			Count: some		Andy Lamb								PRESENT				Crisia spp.					iNaturalist:192680								Crisia							Animalia	Bryozoa	Stenolaemata	Cyclostomatida	Crisiidae	Crisia			genus
	imerss.org:PMLS:9892			Count: abundant		Andy Lamb								PRESENT				Diaperoforma californica					iNaturalist:345872								Diaperoforma californica							Animalia	Bryozoa	Stenolaemata	Cyclostomatida		Diaperoforma	californica		species		(d'Orbigny, 1853)
	imerss.org:PMLS:9991			Count: some		Andy Lamb								PRESENT				Schizoporella japonica					iNaturalist:519486								Schizoporella japonica							Animalia	Bryozoa	Gymnolaemata	Cheilostomatida	Schizoporellidae	Schizoporella	japonica		species		Ortmann, 1890
	imerss.org:PMLS:9992			Count: some		Andy Lamb								PRESENT				Crisia spp.					iNaturalist:192680								Crisia							Animalia	Bryozoa	Stenolaemata	Cyclostomatida	Crisiidae	Crisia			genus
	imerss.org:PMLS:9993			Count: many		Andy Lamb								PRESENT				Diaperoforma californica					iNaturalist:345872								Diaperoforma californica							Animalia	Bryozoa	Stenolaemata	Cyclostomatida		Diaperoforma	californica		species		(d'Orbigny, 1853)
	imerss.org:PMLS:10099			Count: some		Andy Lamb								PRESENT				Crisia spp.					iNaturalist:192680								Crisia							Animalia	Bryozoa	Stenolaemata	Cyclostomatida	Crisiidae	Crisia			genus
	imerss.org:PMLS:10100			Count: many		Andy Lamb								PRESENT				Diaperoforma californica					iNaturalist:345872								Diaperoforma californica							Animalia	Bryozoa	Stenolaemata	Cyclostomatida		Diaperoforma	californica		species		(d'Orbigny, 1853)
	imerss.org:PMLS:10425			Count: few		Andy Lamb								PRESENT				Diaperoforma californica					iNaturalist:345872								Diaperoforma californica							Animalia	Bryozoa	Stenolaemata	Cyclostomatida		Diaperoforma	californica		species		(d'Orbigny, 1853)
	imerss.org:PMLS:10578			Count: some		Andy Lamb								PRESENT				Schizoporella japonica					iNaturalist:519486								Schizoporella japonica							Animalia	Bryozoa	Gymnolaemata	Cheilostomatida	Schizoporellidae	Schizoporella	japonica		species		Ortmann, 1890
	imerss.org:PMLS:10579			Count: few		Andy Lamb								PRESENT				Heteropora pacifica					iNaturalist:465163								Heteropora pacifica							Animalia	Bryozoa	Stenolaemata	Cyclostomatida	Heteroporidae	Heteropora	pacifica		species		Borg, 1933
	imerss.org:PMLS:10580			Count: some		Andy Lamb								PRESENT				Diaperoforma californica					iNaturalist:345872								Diaperoforma californica							Animalia	Bryozoa	Stenolaemata	Cyclostomatida		Diaperoforma	californica		species		(d'Orbigny, 1853)
	imerss.org:PMLS:10685			Count: some		Andy Lamb								PRESENT				Diaperoforma californica					iNaturalist:345872								Diaperoforma californica							Animalia	Bryozoa	Stenolaemata	Cyclostomatida		Diaperoforma	californica		species		(d'Orbigny, 1853)
	imerss.org:PMLS:10842			Count: many		Andy Lamb								PRESENT				Schizoporella japonica					iNaturalist:519486								Schizoporella japonica							Animalia	Bryozoa	Gymnolaemata	Cheilostomatida	Schizoporellidae	Schizoporella	japonica		species		Ortmann, 1890
	imerss.org:PMLS:10843			Count: few		Andy Lamb								PRESENT				Bugulina californica					iNaturalist:551808								Bugulina californica							Animalia	Bryozoa	Gymnolaemata	Cheilostomatida	Bugulidae	Bugulina	californica		species		(Robertson, 1905)
	imerss.org:PMLS:10844			Count: few		Andy Lamb								PRESENT				Dendrobeania murrayana					iNaturalist:205170								Dendrobeania murrayana							Animalia	Bryozoa	Gymnolaemata	Cheilostomatida	Bugulidae	Dendrobeania	murrayana		species		(Bean in Johnston, 1847)
	imerss.org:PMLS:10845			Count: few		Andy Lamb								PRESENT				Crisia spp.					iNaturalist:192680								Crisia							Animalia	Bryozoa	Stenolaemata	Cyclostomatida	Crisiidae	Crisia			genus
	imerss.org:PMLS:10846			Count: many		Andy Lamb								PRESENT				Heteropora pacifica					iNaturalist:465163								Heteropora pacifica							Animalia	Bryozoa	Stenolaemata	Cyclostomatida	Heteroporidae	Heteropora	pacifica		species		Borg, 1933
	imerss.org:PMLS:10847					Andy Lamb		2						PRESENT				Heteropora alaskensis					iNaturalist:873902								Heteropora alaskensis							Animalia	Bryozoa	Stenolaemata	Cyclostomatida	Heteroporidae	Heteropora	alaskensis		species		Borg, 1933
	imerss.org:PMLS:10848			Count: many		Andy Lamb								PRESENT				Diaperoforma californica					iNaturalist:345872								Diaperoforma californica							Animalia	Bryozoa	Stenolaemata	Cyclostomatida		Diaperoforma	californica		species		(d'Orbigny, 1853)
	imerss.org:PMLS:11004			Count: some		Andy Lamb								PRESENT				Schizoporella japonica					iNaturalist:519486								Schizoporella japonica							Animalia	Bryozoa	Gymnolaemata	Cheilostomatida	Schizoporellidae	Schizoporella	japonica		species		Ortmann, 1890
	imerss.org:PMLS:11005			Count: some		Andy Lamb								PRESENT				Crisia spp.					iNaturalist:192680								Crisia							Animalia	Bryozoa	Stenolaemata	Cyclostomatida	Crisiidae	Crisia			genus
	imerss.org:PMLS:11006			Count: very many		Andy Lamb								PRESENT				Heteropora pacifica					iNaturalist:465163								Heteropora pacifica							Animalia	Bryozoa	Stenolaemata	Cyclostomatida	Heteroporidae	Heteropora	pacifica		species		Borg, 1933
	imerss.org:PMLS:11007			Count: few		Andy Lamb								PRESENT				Diaperoforma californica					iNaturalist:345872								Diaperoforma californica							Animalia	Bryozoa	Stenolaemata	Cyclostomatida		Diaperoforma	californica		species		(d'Orbigny, 1853)
	imerss.org:PMLS:11120			Count: many		Andy Lamb								PRESENT				Schizoporella japonica					iNaturalist:519486								Schizoporella japonica							Animalia	Bryozoa	Gymnolaemata	Cheilostomatida	Schizoporellidae	Schizoporella	japonica		species		Ortmann, 1890
	imerss.org:PMLS:11300			Count: some		Andy Lamb								PRESENT				Bugulina californica					iNaturalist:551808								Bugulina californica							Animalia	Bryozoa	Gymnolaemata	Cheilostomatida	Bugulidae	Bugulina	californica		species		(Robertson, 1905)
	imerss.org:PMLS:11301			Count: some		Andy Lamb								PRESENT				Dendrobeania murrayana					iNaturalist:205170								Dendrobeania murrayana							Animalia	Bryozoa	Gymnolaemata	Cheilostomatida	Bugulidae	Dendrobeania	murrayana		species		(Bean in Johnston, 1847)
	imerss.org:PMLS:11302			Count: some		Andy Lamb								PRESENT				Crisia spp.					iNaturalist:192680								Crisia							Animalia	Bryozoa	Stenolaemata	Cyclostomatida	Crisiidae	Crisia			genus
	imerss.org:PMLS:11303			Count: some		Andy Lamb								PRESENT				Diaperoforma californica					iNaturalist:345872								Diaperoforma californica							Animalia	Bryozoa	Stenolaemata	Cyclostomatida		Diaperoforma	californica		species		(d'Orbigny, 1853)
	imerss.org:PMLS:11428			Count: some		Andy Lamb								PRESENT				Crisia spp.					iNaturalist:192680								Crisia							Animalia	Bryozoa	Stenolaemata	Cyclostomatida	Crisiidae	Crisia			genus
	imerss.org:PMLS:11429			Count: few		Andy Lamb								PRESENT				Heteropora pacifica					iNaturalist:465163								Heteropora pacifica							Animalia	Bryozoa	Stenolaemata	Cyclostomatida	Heteroporidae	Heteropora	pacifica		species		Borg, 1933
	imerss.org:PMLS:11430			Count: very many		Andy Lamb								PRESENT				Diaperoforma californica					iNaturalist:345872								Diaperoforma californica							Animalia	Bryozoa	Stenolaemata	Cyclostomatida		Diaperoforma	californica		species		(d'Orbigny, 1853)
	imerss.org:PMLS:11522			Count: few		Andy Lamb								PRESENT				Crisia spp.					iNaturalist:192680								Crisia							Animalia	Bryozoa	Stenolaemata	Cyclostomatida	Crisiidae	Crisia			genus
	imerss.org:PMLS:11523			Count: few		Andy Lamb								PRESENT				Heteropora pacifica					iNaturalist:465163								Heteropora pacifica							Animalia	Bryozoa	Stenolaemata	Cyclostomatida	Heteroporidae	Heteropora	pacifica		species		Borg, 1933
	imerss.org:PMLS:11524			Count: some		Andy Lamb								PRESENT				Diaperoforma californica					iNaturalist:345872								Diaperoforma californica							Animalia	Bryozoa	Stenolaemata	Cyclostomatida		Diaperoforma	californica		species		(d'Orbigny, 1853)
	imerss.org:PMLS:11624					Andy Lamb		1						PRESENT				Phidolopora pacifica					iNaturalist:51796								Phidolopora pacifica							Animalia	Bryozoa	Gymnolaemata	Cheilostomatida	Phidoloporidae	Phidolopora	pacifica		species		(Robertson, 1908)
	imerss.org:PMLS:11625			Count: some		Andy Lamb								PRESENT				Heteropora pacifica					iNaturalist:465163								Heteropora pacifica							Animalia	Bryozoa	Stenolaemata	Cyclostomatida	Heteroporidae	Heteropora	pacifica		species		Borg, 1933
	imerss.org:PMLS:11814			Count: some		Andy Lamb								PRESENT				Crisia spp.					iNaturalist:192680								Crisia							Animalia	Bryozoa	Stenolaemata	Cyclostomatida	Crisiidae	Crisia			genus
	imerss.org:PMLS:11815			Count: few		Andy Lamb								PRESENT				Heteropora pacifica					iNaturalist:465163								Heteropora pacifica							Animalia	Bryozoa	Stenolaemata	Cyclostomatida	Heteroporidae	Heteropora	pacifica		species		Borg, 1933
	imerss.org:PMLS:11916			Count: very many		Andy Lamb								PRESENT				Membranipora villosa					iNaturalist:360867								Membranipora villosa							Animalia	Bryozoa	Gymnolaemata	Cheilostomatida	Membraniporidae	Membranipora	villosa		species		Hincks, 1880
	imerss.org:PMLS:11917			Count: few		Andy Lamb								PRESENT				Crisia spp.					iNaturalist:192680								Crisia							Animalia	Bryozoa	Stenolaemata	Cyclostomatida	Crisiidae	Crisia			genus
	imerss.org:PMLS:11918			Count: many		Andy Lamb								PRESENT				Heteropora pacifica					iNaturalist:465163								Heteropora pacifica							Animalia	Bryozoa	Stenolaemata	Cyclostomatida	Heteroporidae	Heteropora	pacifica		species		Borg, 1933
	imerss.org:PMLS:11919			Count: very many		Andy Lamb								PRESENT				Diaperoforma californica					iNaturalist:345872								Diaperoforma californica							Animalia	Bryozoa	Stenolaemata	Cyclostomatida		Diaperoforma	californica		species		(d'Orbigny, 1853)
	imerss.org:PMLS:12022			Count: many		Andy Lamb								PRESENT				Heteropora pacifica					iNaturalist:465163								Heteropora pacifica							Animalia	Bryozoa	Stenolaemata	Cyclostomatida	Heteroporidae	Heteropora	pacifica		species		Borg, 1933
	imerss.org:PMLS:12023			Count: many		Andy Lamb								PRESENT				Diaperoforma californica					iNaturalist:345872								Diaperoforma californica							Animalia	Bryozoa	Stenolaemata	Cyclostomatida		Diaperoforma	californica		species		(d'Orbigny, 1853)
	imerss.org:PMLS:12107			Count: some		Andy Lamb								PRESENT				Crisia spp.					iNaturalist:192680								Crisia							Animalia	Bryozoa	Stenolaemata	Cyclostomatida	Crisiidae	Crisia			genus
	imerss.org:PMLS:12108			Count: few		Andy Lamb								PRESENT				Phidolopora pacifica					iNaturalist:51796								Phidolopora pacifica							Animalia	Bryozoa	Gymnolaemata	Cheilostomatida	Phidoloporidae	Phidolopora	pacifica		species		(Robertson, 1908)
	imerss.org:PMLS:12109			Count: many		Andy Lamb								PRESENT				Diaperoforma californica					iNaturalist:345872								Diaperoforma californica							Animalia	Bryozoa	Stenolaemata	Cyclostomatida		Diaperoforma	californica		species		(d'Orbigny, 1853)
	imerss.org:PMLS:12209			Count: few		Andy Lamb								PRESENT				Heteropora pacifica					iNaturalist:465163								Heteropora pacifica							Animalia	Bryozoa	Stenolaemata	Cyclostomatida	Heteroporidae	Heteropora	pacifica		species		Borg, 1933
	imerss.org:PMLS:12210			Count: some		Andy Lamb								PRESENT				Diaperoforma californica					iNaturalist:345872								Diaperoforma californica							Animalia	Bryozoa	Stenolaemata	Cyclostomatida		Diaperoforma	californica		species		(d'Orbigny, 1853)
	imerss.org:PMLS:12301			Count: few		Andy Lamb								PRESENT				Diaperoforma californica					iNaturalist:345872								Diaperoforma californica							Animalia	Bryozoa	Stenolaemata	Cyclostomatida		Diaperoforma	californica		species		(d'Orbigny, 1853)
	imerss.org:PMLS:12371			Count: many		Andy Lamb								PRESENT				Diaperoforma californica					iNaturalist:345872								Diaperoforma californica							Animalia	Bryozoa	Stenolaemata	Cyclostomatida		Diaperoforma	californica		species		(d'Orbigny, 1853)
	imerss.org:PMLS:12456			Count: few		Andy Lamb								PRESENT				Heteropora pacifica					iNaturalist:465163								Heteropora pacifica							Animalia	Bryozoa	Stenolaemata	Cyclostomatida	Heteroporidae	Heteropora	pacifica		species		Borg, 1933
	imerss.org:PMLS:12539			Count: some		Andy Lamb								PRESENT				Schizoporella japonica					iNaturalist:519486								Schizoporella japonica							Animalia	Bryozoa	Gymnolaemata	Cheilostomatida	Schizoporellidae	Schizoporella	japonica		species		Ortmann, 1890
	imerss.org:PMLS:12540			Count: some		Andy Lamb								PRESENT				Dendrobeania murrayana					iNaturalist:205170								Dendrobeania murrayana							Animalia	Bryozoa	Gymnolaemata	Cheilostomatida	Bugulidae	Dendrobeania	murrayana		species		(Bean in Johnston, 1847)
	imerss.org:PMLS:12541			Count: some		Andy Lamb								PRESENT				Heteropora pacifica					iNaturalist:465163								Heteropora pacifica							Animalia	Bryozoa	Stenolaemata	Cyclostomatida	Heteroporidae	Heteropora	pacifica		species		Borg, 1933
	imerss.org:PMLS:12542			Count: very many		Andy Lamb								PRESENT				Heteropora alaskensis					iNaturalist:873902								Heteropora alaskensis							Animalia	Bryozoa	Stenolaemata	Cyclostomatida	Heteroporidae	Heteropora	alaskensis		species		Borg, 1933
	imerss.org:PMLS:12639			Count: some		Andy Lamb								PRESENT				Heteropora pacifica					iNaturalist:465163								Heteropora pacifica							Animalia	Bryozoa	Stenolaemata	Cyclostomatida	Heteroporidae	Heteropora	pacifica		species		Borg, 1933
	imerss.org:PMLS:12721			Count: some		Andy Lamb								PRESENT				Dendrobeania murrayana					iNaturalist:205170								Dendrobeania murrayana							Animalia	Bryozoa	Gymnolaemata	Cheilostomatida	Bugulidae	Dendrobeania	murrayana		species		(Bean in Johnston, 1847)
	imerss.org:PMLS:12722			Count: few		Andy Lamb								PRESENT				Heteropora pacifica					iNaturalist:465163								Heteropora pacifica							Animalia	Bryozoa	Stenolaemata	Cyclostomatida	Heteroporidae	Heteropora	pacifica		species		Borg, 1933
	imerss.org:PMLS:12723			Count: some		Andy Lamb								PRESENT				Heteropora alaskensis					iNaturalist:873902								Heteropora alaskensis							Animalia	Bryozoa	Stenolaemata	Cyclostomatida	Heteroporidae	Heteropora	alaskensis		species		Borg, 1933
	imerss.org:PMLS:12724			Count: some		Andy Lamb								PRESENT				Diaperoforma californica					iNaturalist:345872								Diaperoforma californica							Animalia	Bryozoa	Stenolaemata	Cyclostomatida		Diaperoforma	californica		species		(d'Orbigny, 1853)
	imerss.org:PMLS:12845			Count: some		Andy Lamb								PRESENT				Dendrobeania murrayana					iNaturalist:205170								Dendrobeania murrayana							Animalia	Bryozoa	Gymnolaemata	Cheilostomatida	Bugulidae	Dendrobeania	murrayana		species		(Bean in Johnston, 1847)
	imerss.org:PMLS:12846			Count: very many		Andy Lamb								PRESENT				Crisia spp.					iNaturalist:192680								Crisia							Animalia	Bryozoa	Stenolaemata	Cyclostomatida	Crisiidae	Crisia			genus
	imerss.org:PMLS:12847			Count: some		Andy Lamb								PRESENT				Heteropora pacifica					iNaturalist:465163								Heteropora pacifica							Animalia	Bryozoa	Stenolaemata	Cyclostomatida	Heteroporidae	Heteropora	pacifica		species		Borg, 1933
	imerss.org:PMLS:12968			Count: some		Andy Lamb								PRESENT				Dendrobeania murrayana					iNaturalist:205170								Dendrobeania murrayana							Animalia	Bryozoa	Gymnolaemata	Cheilostomatida	Bugulidae	Dendrobeania	murrayana		species		(Bean in Johnston, 1847)
	imerss.org:PMLS:12969			Count: some		Andy Lamb								PRESENT				Crisia spp.					iNaturalist:192680								Crisia							Animalia	Bryozoa	Stenolaemata	Cyclostomatida	Crisiidae	Crisia			genus
	imerss.org:PMLS:12970			Count: many		Andy Lamb								PRESENT				Heteropora alaskensis					iNaturalist:873902								Heteropora alaskensis							Animalia	Bryozoa	Stenolaemata	Cyclostomatida	Heteroporidae	Heteropora	alaskensis		species		Borg, 1933
	imerss.org:PMLS:13168			Count: very many		Andy Lamb								PRESENT				Schizoporella japonica					iNaturalist:519486								Schizoporella japonica							Animalia	Bryozoa	Gymnolaemata	Cheilostomatida	Schizoporellidae	Schizoporella	japonica		species		Ortmann, 1890
	imerss.org:PMLS:13169			Count: very many		Andy Lamb								PRESENT				Bugulina californica					iNaturalist:551808								Bugulina californica							Animalia	Bryozoa	Gymnolaemata	Cheilostomatida	Bugulidae	Bugulina	californica		species		(Robertson, 1905)
	imerss.org:PMLS:13170			Count: some		Andy Lamb								PRESENT				Dendrobeania murrayana					iNaturalist:205170								Dendrobeania murrayana							Animalia	Bryozoa	Gymnolaemata	Cheilostomatida	Bugulidae	Dendrobeania	murrayana		species		(Bean in Johnston, 1847)
	imerss.org:PMLS:13171			Count: very many		Andy Lamb								PRESENT				Crisia spp.					iNaturalist:192680								Crisia							Animalia	Bryozoa	Stenolaemata	Cyclostomatida	Crisiidae	Crisia			genus
	imerss.org:PMLS:13172			Count: few		Andy Lamb								PRESENT				Phidolopora pacifica					iNaturalist:51796								Phidolopora pacifica							Animalia	Bryozoa	Gymnolaemata	Cheilostomatida	Phidoloporidae	Phidolopora	pacifica		species		(Robertson, 1908)
	imerss.org:PMLS:13173			Count: some		Andy Lamb								PRESENT				Heteropora pacifica					iNaturalist:465163								Heteropora pacifica							Animalia	Bryozoa	Stenolaemata	Cyclostomatida	Heteroporidae	Heteropora	pacifica		species		Borg, 1933
	imerss.org:PMLS:13174			Count: many		Andy Lamb								PRESENT				Diaperoforma californica					iNaturalist:345872								Diaperoforma californica							Animalia	Bryozoa	Stenolaemata	Cyclostomatida		Diaperoforma	californica		species		(d'Orbigny, 1853)
	imerss.org:PMLS:13297			Count: some		Andy Lamb								PRESENT				Membranipora villosa					iNaturalist:360867								Membranipora villosa							Animalia	Bryozoa	Gymnolaemata	Cheilostomatida	Membraniporidae	Membranipora	villosa		species		Hincks, 1880
	imerss.org:PMLS:13298			Count: some		Andy Lamb								PRESENT				Crisia spp.					iNaturalist:192680								Crisia							Animalia	Bryozoa	Stenolaemata	Cyclostomatida	Crisiidae	Crisia			genus
	imerss.org:PMLS:13299			Count: some		Andy Lamb								PRESENT				Heteropora pacifica					iNaturalist:465163								Heteropora pacifica							Animalia	Bryozoa	Stenolaemata	Cyclostomatida	Heteroporidae	Heteropora	pacifica		species		Borg, 1933
	imerss.org:PMLS:13406			Count: many		Andy Lamb								PRESENT				Membranipora villosa					iNaturalist:360867								Membranipora villosa							Animalia	Bryozoa	Gymnolaemata	Cheilostomatida	Membraniporidae	Membranipora	villosa		species		Hincks, 1880
	imerss.org:PMLS:13407			Count: some		Andy Lamb								PRESENT				Schizoporella japonica					iNaturalist:519486								Schizoporella japonica							Animalia	Bryozoa	Gymnolaemata	Cheilostomatida	Schizoporellidae	Schizoporella	japonica		species		Ortmann, 1890
	imerss.org:PMLS:13408			Count: few		Andy Lamb								PRESENT				Dendrobeania murrayana					iNaturalist:205170								Dendrobeania murrayana							Animalia	Bryozoa	Gymnolaemata	Cheilostomatida	Bugulidae	Dendrobeania	murrayana		species		(Bean in Johnston, 1847)
	imerss.org:PMLS:13489			Count: some		Andy Lamb								PRESENT				Membranipora villosa					iNaturalist:360867								Membranipora villosa							Animalia	Bryozoa	Gymnolaemata	Cheilostomatida	Membraniporidae	Membranipora	villosa		species		Hincks, 1880
	imerss.org:PMLS:13490			Count: few		Andy Lamb								PRESENT				Crisia spp.					iNaturalist:192680								Crisia							Animalia	Bryozoa	Stenolaemata	Cyclostomatida	Crisiidae	Crisia			genus
	imerss.org:PMLS:13491			Count: few		Andy Lamb								PRESENT				Diaperoforma californica					iNaturalist:345872								Diaperoforma californica							Animalia	Bryozoa	Stenolaemata	Cyclostomatida		Diaperoforma	californica		species		(d'Orbigny, 1853)
	imerss.org:PMLS:13575			Count: some		Andy Lamb								PRESENT				Diaperoforma californica					iNaturalist:345872								Diaperoforma californica							Animalia	Bryozoa	Stenolaemata	Cyclostomatida		Diaperoforma	californica		species		(d'Orbigny, 1853)
	imerss.org:PMLS:13677			Count: some		Andy Lamb								PRESENT				Membranipora villosa					iNaturalist:360867								Membranipora villosa							Animalia	Bryozoa	Gymnolaemata	Cheilostomatida	Membraniporidae	Membranipora	villosa		species		Hincks, 1880
	imerss.org:PMLS:13678			Count: some		Andy Lamb								PRESENT				Schizoporella japonica					iNaturalist:519486								Schizoporella japonica							Animalia	Bryozoa	Gymnolaemata	Cheilostomatida	Schizoporellidae	Schizoporella	japonica		species		Ortmann, 1890
	imerss.org:PMLS:13679			Count: few		Andy Lamb								PRESENT				Dendrobeania murrayana					iNaturalist:205170								Dendrobeania murrayana							Animalia	Bryozoa	Gymnolaemata	Cheilostomatida	Bugulidae	Dendrobeania	murrayana		species		(Bean in Johnston, 1847)
	imerss.org:PMLS:13680			Count: very many		Andy Lamb								PRESENT				Crisia spp.					iNaturalist:192680								Crisia							Animalia	Bryozoa	Stenolaemata	Cyclostomatida	Crisiidae	Crisia			genus
	imerss.org:PMLS:13681			Count: very many		Andy Lamb								PRESENT				Diaperoforma californica					iNaturalist:345872								Diaperoforma californica							Animalia	Bryozoa	Stenolaemata	Cyclostomatida		Diaperoforma	californica		species		(d'Orbigny, 1853)
	imerss.org:PMLS:13792			Count: some		Andy Lamb								PRESENT				Schizoporella japonica					iNaturalist:519486								Schizoporella japonica							Animalia	Bryozoa	Gymnolaemata	Cheilostomatida	Schizoporellidae	Schizoporella	japonica		species		Ortmann, 1890
	imerss.org:PMLS:13793			Count: few		Andy Lamb								PRESENT				Dendrobeania murrayana					iNaturalist:205170								Dendrobeania murrayana							Animalia	Bryozoa	Gymnolaemata	Cheilostomatida	Bugulidae	Dendrobeania	murrayana		species		(Bean in Johnston, 1847)
	imerss.org:PMLS:13794			Count: few		Andy Lamb								PRESENT				Crisia spp.					iNaturalist:192680								Crisia							Animalia	Bryozoa	Stenolaemata	Cyclostomatida	Crisiidae	Crisia			genus
	imerss.org:PMLS:13880			Count: some		Andy Lamb								PRESENT				Schizoporella japonica					iNaturalist:519486								Schizoporella japonica							Animalia	Bryozoa	Gymnolaemata	Cheilostomatida	Schizoporellidae	Schizoporella	japonica		species		Ortmann, 1890
	imerss.org:PMLS:13881			Count: few		Andy Lamb								PRESENT				Dendrobeania murrayana					iNaturalist:205170								Dendrobeania murrayana							Animalia	Bryozoa	Gymnolaemata	Cheilostomatida	Bugulidae	Dendrobeania	murrayana		species		(Bean in Johnston, 1847)
	imerss.org:PMLS:13882			Count: some		Andy Lamb								PRESENT				Crisia spp.					iNaturalist:192680								Crisia							Animalia	Bryozoa	Stenolaemata	Cyclostomatida	Crisiidae	Crisia			genus
	imerss.org:PMLS:13883			Count: few		Andy Lamb								PRESENT				Heteropora alaskensis					iNaturalist:873902								Heteropora alaskensis							Animalia	Bryozoa	Stenolaemata	Cyclostomatida	Heteroporidae	Heteropora	alaskensis		species		Borg, 1933
	imerss.org:PMLS:13884			Count: very many		Andy Lamb								PRESENT				Diaperoforma californica					iNaturalist:345872								Diaperoforma californica							Animalia	Bryozoa	Stenolaemata	Cyclostomatida		Diaperoforma	californica		species		(d'Orbigny, 1853)
	imerss.org:PMLS:14050			Count: few		Andy Lamb								PRESENT				Crisia spp.					iNaturalist:192680								Crisia							Animalia	Bryozoa	Stenolaemata	Cyclostomatida	Crisiidae	Crisia			genus
	imerss.org:PMLS:14051			Count: few		Andy Lamb								PRESENT				Heteropora pacifica					iNaturalist:465163								Heteropora pacifica							Animalia	Bryozoa	Stenolaemata	Cyclostomatida	Heteroporidae	Heteropora	pacifica		species		Borg, 1933
	imerss.org:PMLS:14121			Count: some		Andy Lamb								PRESENT				Crisia spp.					iNaturalist:192680								Crisia							Animalia	Bryozoa	Stenolaemata	Cyclostomatida	Crisiidae	Crisia			genus
	imerss.org:PMLS:14189			Count: some		Andy Lamb								PRESENT				Schizoporella japonica					iNaturalist:519486								Schizoporella japonica							Animalia	Bryozoa	Gymnolaemata	Cheilostomatida	Schizoporellidae	Schizoporella	japonica		species		Ortmann, 1890
	imerss.org:PMLS:14190			Count: some		Andy Lamb								PRESENT				Crisia spp.					iNaturalist:192680								Crisia							Animalia	Bryozoa	Stenolaemata	Cyclostomatida	Crisiidae	Crisia			genus
	imerss.org:PMLS:14191			Count: very many		Andy Lamb								PRESENT				Heteropora pacifica					iNaturalist:465163								Heteropora pacifica							Animalia	Bryozoa	Stenolaemata	Cyclostomatida	Heteroporidae	Heteropora	pacifica		species		Borg, 1933
	imerss.org:PMLS:14192			Count: some		Andy Lamb								PRESENT				Diaperoforma californica					iNaturalist:345872								Diaperoforma californica							Animalia	Bryozoa	Stenolaemata	Cyclostomatida		Diaperoforma	californica		species		(d'Orbigny, 1853)
	imerss.org:PMLS:14281			Count: few		Andy Lamb								PRESENT				Schizoporella japonica					iNaturalist:519486								Schizoporella japonica							Animalia	Bryozoa	Gymnolaemata	Cheilostomatida	Schizoporellidae	Schizoporella	japonica		species		Ortmann, 1890
	imerss.org:PMLS:14381			Count: some		Andy Lamb								PRESENT				Schizoporella japonica					iNaturalist:519486								Schizoporella japonica							Animalia	Bryozoa	Gymnolaemata	Cheilostomatida	Schizoporellidae	Schizoporella	japonica		species		Ortmann, 1890
	imerss.org:PMLS:14382			Count: few		Andy Lamb								PRESENT				Crisia spp.					iNaturalist:192680								Crisia							Animalia	Bryozoa	Stenolaemata	Cyclostomatida	Crisiidae	Crisia			genus
	imerss.org:PMLS:14473			Count: some		Andy Lamb								PRESENT				Dendrobeania murrayana					iNaturalist:205170								Dendrobeania murrayana							Animalia	Bryozoa	Gymnolaemata	Cheilostomatida	Bugulidae	Dendrobeania	murrayana		species		(Bean in Johnston, 1847)
	imerss.org:PMLS:14474			Count: some		Andy Lamb								PRESENT				Crisia spp.					iNaturalist:192680								Crisia							Animalia	Bryozoa	Stenolaemata	Cyclostomatida	Crisiidae	Crisia			genus
	imerss.org:PMLS:14556			Count: very many		Andy Lamb								PRESENT				Membranipora villosa					iNaturalist:360867								Membranipora villosa							Animalia	Bryozoa	Gymnolaemata	Cheilostomatida	Membraniporidae	Membranipora	villosa		species		Hincks, 1880
	imerss.org:PMLS:14557			Count: some		Andy Lamb								PRESENT				Dendrobeania murrayana					iNaturalist:205170								Dendrobeania murrayana							Animalia	Bryozoa	Gymnolaemata	Cheilostomatida	Bugulidae	Dendrobeania	murrayana		species		(Bean in Johnston, 1847)
	imerss.org:PMLS:14558			Count: few		Andy Lamb								PRESENT				Crisia spp.					iNaturalist:192680								Crisia							Animalia	Bryozoa	Stenolaemata	Cyclostomatida	Crisiidae	Crisia			genus
	imerss.org:PMLS:14646			Count: many		Andy Lamb								PRESENT				Membranipora villosa					iNaturalist:360867								Membranipora villosa							Animalia	Bryozoa	Gymnolaemata	Cheilostomatida	Membraniporidae	Membranipora	villosa		species		Hincks, 1880
	imerss.org:PMLS:14647			Count: some		Andy Lamb								PRESENT				Crisia spp.					iNaturalist:192680								Crisia							Animalia	Bryozoa	Stenolaemata	Cyclostomatida	Crisiidae	Crisia			genus
	imerss.org:PMLS:14648					Andy Lamb		2						PRESENT				Phidolopora pacifica					iNaturalist:51796								Phidolopora pacifica							Animalia	Bryozoa	Gymnolaemata	Cheilostomatida	Phidoloporidae	Phidolopora	pacifica		species		(Robertson, 1908)
	imerss.org:PMLS:14649			Count: many		Andy Lamb								PRESENT				Diaperoforma californica					iNaturalist:345872								Diaperoforma californica							Animalia	Bryozoa	Stenolaemata	Cyclostomatida		Diaperoforma	californica		species		(d'Orbigny, 1853)
	imerss.org:PMLS:14749			Count: some		Andy Lamb								PRESENT				Membranipora villosa					iNaturalist:360867								Membranipora villosa							Animalia	Bryozoa	Gymnolaemata	Cheilostomatida	Membraniporidae	Membranipora	villosa		species		Hincks, 1880
	imerss.org:PMLS:14750			Count: some		Andy Lamb								PRESENT				Crisia spp.					iNaturalist:192680								Crisia							Animalia	Bryozoa	Stenolaemata	Cyclostomatida	Crisiidae	Crisia			genus
	imerss.org:PMLS:14751			Count: some		Andy Lamb								PRESENT				Diaperoforma californica					iNaturalist:345872								Diaperoforma californica							Animalia	Bryozoa	Stenolaemata	Cyclostomatida		Diaperoforma	californica		species		(d'Orbigny, 1853)
	imerss.org:PMLS:14854			Count: many		Andy Lamb								PRESENT				Crisia spp.					iNaturalist:192680								Crisia							Animalia	Bryozoa	Stenolaemata	Cyclostomatida	Crisiidae	Crisia			genus
	imerss.org:PMLS:14855					Andy Lamb		1						PRESENT				Heteropora pacifica					iNaturalist:465163								Heteropora pacifica							Animalia	Bryozoa	Stenolaemata	Cyclostomatida	Heteroporidae	Heteropora	pacifica		species		Borg, 1933
	imerss.org:PMLS:14856			Count: few		Andy Lamb								PRESENT				Diaperoforma californica					iNaturalist:345872								Diaperoforma californica							Animalia	Bryozoa	Stenolaemata	Cyclostomatida		Diaperoforma	californica		species		(d'Orbigny, 1853)
	imerss.org:PMLS:14963			Count: some		Andy Lamb								PRESENT				Schizoporella japonica					iNaturalist:519486								Schizoporella japonica							Animalia	Bryozoa	Gymnolaemata	Cheilostomatida	Schizoporellidae	Schizoporella	japonica		species		Ortmann, 1890
	imerss.org:PMLS:14964			Count: few		Andy Lamb								PRESENT				Crisia spp.					iNaturalist:192680								Crisia							Animalia	Bryozoa	Stenolaemata	Cyclostomatida	Crisiidae	Crisia			genus
	imerss.org:PMLS:15058			Count: many		Andy Lamb								PRESENT				Membranipora villosa					iNaturalist:360867								Membranipora villosa							Animalia	Bryozoa	Gymnolaemata	Cheilostomatida	Membraniporidae	Membranipora	villosa		species		Hincks, 1880
	imerss.org:PMLS:15059			Count: some		Andy Lamb								PRESENT				Crisia spp.					iNaturalist:192680								Crisia							Animalia	Bryozoa	Stenolaemata	Cyclostomatida	Crisiidae	Crisia			genus
	imerss.org:PMLS:15060					Andy Lamb		2						PRESENT				Heteropora pacifica					iNaturalist:465163								Heteropora pacifica							Animalia	Bryozoa	Stenolaemata	Cyclostomatida	Heteroporidae	Heteropora	pacifica		species		Borg, 1933
	imerss.org:PMLS:15166			Count: some		Andy Lamb								PRESENT				Membranipora villosa					iNaturalist:360867								Membranipora villosa							Animalia	Bryozoa	Gymnolaemata	Cheilostomatida	Membraniporidae	Membranipora	villosa		species		Hincks, 1880
	imerss.org:PMLS:15167			Count: some		Andy Lamb								PRESENT				Crisia spp.					iNaturalist:192680								Crisia							Animalia	Bryozoa	Stenolaemata	Cyclostomatida	Crisiidae	Crisia			genus
	imerss.org:PMLS:15263			Count: abundant		Andy Lamb								PRESENT				Membranipora villosa					iNaturalist:360867								Membranipora villosa							Animalia	Bryozoa	Gymnolaemata	Cheilostomatida	Membraniporidae	Membranipora	villosa		species		Hincks, 1880
	imerss.org:PMLS:15264			Count: many		Andy Lamb								PRESENT				Dendrobeania murrayana					iNaturalist:205170								Dendrobeania murrayana							Animalia	Bryozoa	Gymnolaemata	Cheilostomatida	Bugulidae	Dendrobeania	murrayana		species		(Bean in Johnston, 1847)
	imerss.org:PMLS:15265			Count: some		Andy Lamb								PRESENT				Crisia spp.					iNaturalist:192680								Crisia							Animalia	Bryozoa	Stenolaemata	Cyclostomatida	Crisiidae	Crisia			genus
	imerss.org:PMLS:15359					Andy Lamb		2						PRESENT				Bugulina californica					iNaturalist:551808								Bugulina californica							Animalia	Bryozoa	Gymnolaemata	Cheilostomatida	Bugulidae	Bugulina	californica		species		(Robertson, 1905)
	imerss.org:PMLS:15360			Count: some		Andy Lamb								PRESENT				Diaperoforma californica					iNaturalist:345872								Diaperoforma californica							Animalia	Bryozoa	Stenolaemata	Cyclostomatida		Diaperoforma	californica		species		(d'Orbigny, 1853)
	imerss.org:PMLS:15477			Count: some		Andy Lamb								PRESENT				Crisia spp.					iNaturalist:192680								Crisia							Animalia	Bryozoa	Stenolaemata	Cyclostomatida	Crisiidae	Crisia			genus
	imerss.org:PMLS:15478			Count: some		Andy Lamb								PRESENT				Heteropora pacifica					iNaturalist:465163								Heteropora pacifica							Animalia	Bryozoa	Stenolaemata	Cyclostomatida	Heteroporidae	Heteropora	pacifica		species		Borg, 1933
	imerss.org:PMLS:15479			Count: few		Andy Lamb								PRESENT				Diaperoforma californica					iNaturalist:345872								Diaperoforma californica							Animalia	Bryozoa	Stenolaemata	Cyclostomatida		Diaperoforma	californica		species		(d'Orbigny, 1853)
	imerss.org:PMLS:15588			Count: few		Andy Lamb								PRESENT				Membranipora villosa					iNaturalist:360867								Membranipora villosa							Animalia	Bryozoa	Gymnolaemata	Cheilostomatida	Membraniporidae	Membranipora	villosa		species		Hincks, 1880
	imerss.org:PMLS:15589			Count: some		Andy Lamb								PRESENT				Crisia spp.					iNaturalist:192680								Crisia							Animalia	Bryozoa	Stenolaemata	Cyclostomatida	Crisiidae	Crisia			genus
	imerss.org:PMLS:15590					Andy Lamb		2						PRESENT				Heteropora pacifica					iNaturalist:465163								Heteropora pacifica							Animalia	Bryozoa	Stenolaemata	Cyclostomatida	Heteroporidae	Heteropora	pacifica		species		Borg, 1933
	imerss.org:PMLS:15591			Count: some		Andy Lamb								PRESENT				Diaperoforma californica					iNaturalist:345872								Diaperoforma californica							Animalia	Bryozoa	Stenolaemata	Cyclostomatida		Diaperoforma	californica		species		(d'Orbigny, 1853)
	imerss.org:PMLS:15705			Count: very many		Andy Lamb								PRESENT				Bugulina californica					iNaturalist:551808								Bugulina californica							Animalia	Bryozoa	Gymnolaemata	Cheilostomatida	Bugulidae	Bugulina	californica		species		(Robertson, 1905)
	imerss.org:PMLS:15706			Count: few		Andy Lamb								PRESENT				Crisia spp.					iNaturalist:192680								Crisia							Animalia	Bryozoa	Stenolaemata	Cyclostomatida	Crisiidae	Crisia			genus
	imerss.org:PMLS:15707			Count: few		Andy Lamb								PRESENT				Diaperoforma californica					iNaturalist:345872								Diaperoforma californica							Animalia	Bryozoa	Stenolaemata	Cyclostomatida		Diaperoforma	californica		species		(d'Orbigny, 1853)
	imerss.org:PMLS:15815			Count: few		Andy Lamb								PRESENT				Crisia spp.					iNaturalist:192680								Crisia							Animalia	Bryozoa	Stenolaemata	Cyclostomatida	Crisiidae	Crisia			genus
	imerss.org:PMLS:15816			Count: few		Andy Lamb								PRESENT				Diaperoforma californica					iNaturalist:345872								Diaperoforma californica							Animalia	Bryozoa	Stenolaemata	Cyclostomatida		Diaperoforma	californica		species		(d'Orbigny, 1853)
	imerss.org:PMLS:15937					Andy Lamb		2						PRESENT				Bugulina californica					iNaturalist:551808								Bugulina californica							Animalia	Bryozoa	Gymnolaemata	Cheilostomatida	Bugulidae	Bugulina	californica		species		(Robertson, 1905)
	imerss.org:PMLS:15938			Count: few		Andy Lamb								PRESENT				Dendrobeania murrayana					iNaturalist:205170								Dendrobeania murrayana							Animalia	Bryozoa	Gymnolaemata	Cheilostomatida	Bugulidae	Dendrobeania	murrayana		species		(Bean in Johnston, 1847)
	imerss.org:PMLS:15939			Count: few		Andy Lamb								PRESENT				Crisia spp.					iNaturalist:192680								Crisia							Animalia	Bryozoa	Stenolaemata	Cyclostomatida	Crisiidae	Crisia			genus
	imerss.org:PMLS:15940					Andy Lamb		3						PRESENT				Phidolopora pacifica					iNaturalist:51796								Phidolopora pacifica							Animalia	Bryozoa	Gymnolaemata	Cheilostomatida	Phidoloporidae	Phidolopora	pacifica		species		(Robertson, 1908)
	imerss.org:PMLS:16053			Count: some		Andy Lamb								PRESENT				Crisia spp.					iNaturalist:192680								Crisia							Animalia	Bryozoa	Stenolaemata	Cyclostomatida	Crisiidae	Crisia			genus
	imerss.org:PMLS:16054			Count: some		Andy Lamb								PRESENT				Heteropora pacifica					iNaturalist:465163								Heteropora pacifica							Animalia	Bryozoa	Stenolaemata	Cyclostomatida	Heteroporidae	Heteropora	pacifica		species		Borg, 1933
	imerss.org:PMLS:16055			Count: many		Andy Lamb								PRESENT				Diaperoforma californica					iNaturalist:345872								Diaperoforma californica							Animalia	Bryozoa	Stenolaemata	Cyclostomatida		Diaperoforma	californica		species		(d'Orbigny, 1853)
	imerss.org:PMLS:16152			Count: few		Andy Lamb								PRESENT				Heteropora pacifica					iNaturalist:465163								Heteropora pacifica							Animalia	Bryozoa	Stenolaemata	Cyclostomatida	Heteroporidae	Heteropora	pacifica		species		Borg, 1933
	imerss.org:PMLS:16153			Count: some		Andy Lamb								PRESENT				Diaperoforma californica					iNaturalist:345872								Diaperoforma californica							Animalia	Bryozoa	Stenolaemata	Cyclostomatida		Diaperoforma	californica		species		(d'Orbigny, 1853)
	imerss.org:PMLS:16233			Count: few		Andy Lamb								PRESENT				Bugulina californica					iNaturalist:551808								Bugulina californica							Animalia	Bryozoa	Gymnolaemata	Cheilostomatida	Bugulidae	Bugulina	californica		species		(Robertson, 1905)
	imerss.org:PMLS:16322			Count: very many		Andy Lamb								PRESENT				Bugulina californica					iNaturalist:551808								Bugulina californica							Animalia	Bryozoa	Gymnolaemata	Cheilostomatida	Bugulidae	Bugulina	californica		species		(Robertson, 1905)
	imerss.org:PMLS:16405			Count: some		Andy Lamb								PRESENT				Dendrobeania murrayana					iNaturalist:205170								Dendrobeania murrayana							Animalia	Bryozoa	Gymnolaemata	Cheilostomatida	Bugulidae	Dendrobeania	murrayana		species		(Bean in Johnston, 1847)
	imerss.org:PMLS:16498			Count: few		Andy Lamb								PRESENT				Dendrobeania murrayana					iNaturalist:205170								Dendrobeania murrayana							Animalia	Bryozoa	Gymnolaemata	Cheilostomatida	Bugulidae	Dendrobeania	murrayana		species		(Bean in Johnston, 1847)
	imerss.org:PMLS:16499			Count: few		Andy Lamb								PRESENT				Crisia spp.					iNaturalist:192680								Crisia							Animalia	Bryozoa	Stenolaemata	Cyclostomatida	Crisiidae	Crisia			genus
	imerss.org:PMLS:16500			Count: many		Andy Lamb								PRESENT				Heteropora pacifica					iNaturalist:465163								Heteropora pacifica							Animalia	Bryozoa	Stenolaemata	Cyclostomatida	Heteroporidae	Heteropora	pacifica		species		Borg, 1933
	imerss.org:PMLS:16501			Count: some		Andy Lamb								PRESENT				Diaperoforma californica					iNaturalist:345872								Diaperoforma californica							Animalia	Bryozoa	Stenolaemata	Cyclostomatida		Diaperoforma	californica		species		(d'Orbigny, 1853)
	imerss.org:PMLS:16596			Count: few		Andy Lamb								PRESENT				Crisia spp.					iNaturalist:192680								Crisia							Animalia	Bryozoa	Stenolaemata	Cyclostomatida	Crisiidae	Crisia			genus
	imerss.org:PMLS:16682			Count: few		Andy Lamb								PRESENT				Heteropora pacifica					iNaturalist:465163								Heteropora pacifica							Animalia	Bryozoa	Stenolaemata	Cyclostomatida	Heteroporidae	Heteropora	pacifica		species		Borg, 1933
	imerss.org:PMLS:16683			Count: some		Andy Lamb								PRESENT				Diaperoforma californica					iNaturalist:345872								Diaperoforma californica							Animalia	Bryozoa	Stenolaemata	Cyclostomatida		Diaperoforma	californica		species		(d'Orbigny, 1853)
	imerss.org:PMLS:16749			Count: some		Andy Lamb								PRESENT				Membranipora villosa					iNaturalist:360867								Membranipora villosa							Animalia	Bryozoa	Gymnolaemata	Cheilostomatida	Membraniporidae	Membranipora	villosa		species		Hincks, 1880
	imerss.org:PMLS:16815			Count: few		Andy Lamb								PRESENT				Diaperoforma californica					iNaturalist:345872								Diaperoforma californica							Animalia	Bryozoa	Stenolaemata	Cyclostomatida		Diaperoforma	californica		species		(d'Orbigny, 1853)
	imerss.org:PMLS:16915			Count: some		Andy Lamb								PRESENT				Schizoporella japonica					iNaturalist:519486								Schizoporella japonica							Animalia	Bryozoa	Gymnolaemata	Cheilostomatida	Schizoporellidae	Schizoporella	japonica		species		Ortmann, 1890
	imerss.org:PMLS:16916			Count: some		Andy Lamb								PRESENT				Diaperoforma californica					iNaturalist:345872								Diaperoforma californica							Animalia	Bryozoa	Stenolaemata	Cyclostomatida		Diaperoforma	californica		species		(d'Orbigny, 1853)
	imerss.org:PMLS:17111					Andy Lamb		3						PRESENT				Schizoporella japonica					iNaturalist:519486								Schizoporella japonica							Animalia	Bryozoa	Gymnolaemata	Cheilostomatida	Schizoporellidae	Schizoporella	japonica		species		Ortmann, 1890
	imerss.org:PMLS:17195			Count: few		Andy Lamb								PRESENT				Schizoporella japonica					iNaturalist:519486								Schizoporella japonica							Animalia	Bryozoa	Gymnolaemata	Cheilostomatida	Schizoporellidae	Schizoporella	japonica		species		Ortmann, 1890
	imerss.org:PMLS:17196			Count: few		Andy Lamb								PRESENT				Crisia spp.					iNaturalist:192680								Crisia							Animalia	Bryozoa	Stenolaemata	Cyclostomatida	Crisiidae	Crisia			genus
	imerss.org:PMLS:17299			Count: many		Andy Lamb								PRESENT				Schizoporella japonica					iNaturalist:519486								Schizoporella japonica							Animalia	Bryozoa	Gymnolaemata	Cheilostomatida	Schizoporellidae	Schizoporella	japonica		species		Ortmann, 1890
	imerss.org:PMLS:17300			Count: few		Andy Lamb								PRESENT				Crisia spp.					iNaturalist:192680								Crisia							Animalia	Bryozoa	Stenolaemata	Cyclostomatida	Crisiidae	Crisia			genus
	imerss.org:PMLS:17301			Count: few		Andy Lamb								PRESENT				Heteropora pacifica					iNaturalist:465163								Heteropora pacifica							Animalia	Bryozoa	Stenolaemata	Cyclostomatida	Heteroporidae	Heteropora	pacifica		species		Borg, 1933
	imerss.org:PMLS:17392			Count: some		Andy Lamb								PRESENT				Crisia spp.					iNaturalist:192680								Crisia							Animalia	Bryozoa	Stenolaemata	Cyclostomatida	Crisiidae	Crisia			genus
	imerss.org:PMLS:17489			Count: many		Andy Lamb								PRESENT				Membranipora villosa					iNaturalist:360867								Membranipora villosa							Animalia	Bryozoa	Gymnolaemata	Cheilostomatida	Membraniporidae	Membranipora	villosa		species		Hincks, 1880
	imerss.org:PMLS:17490			Count: some		Andy Lamb								PRESENT				Schizoporella japonica					iNaturalist:519486								Schizoporella japonica							Animalia	Bryozoa	Gymnolaemata	Cheilostomatida	Schizoporellidae	Schizoporella	japonica		species		Ortmann, 1890
	imerss.org:PMLS:17491			Count: some		Andy Lamb								PRESENT				Dendrobeania murrayana					iNaturalist:205170								Dendrobeania murrayana							Animalia	Bryozoa	Gymnolaemata	Cheilostomatida	Bugulidae	Dendrobeania	murrayana		species		(Bean in Johnston, 1847)
	imerss.org:PMLS:17492			Count: many		Andy Lamb								PRESENT				Crisia spp.					iNaturalist:192680								Crisia							Animalia	Bryozoa	Stenolaemata	Cyclostomatida	Crisiidae	Crisia			genus
	imerss.org:PMLS:17493			Count: many		Andy Lamb								PRESENT				Diaperoforma californica					iNaturalist:345872								Diaperoforma californica							Animalia	Bryozoa	Stenolaemata	Cyclostomatida		Diaperoforma	californica		species		(d'Orbigny, 1853)
	imerss.org:PMLS:17599			Count: some		Andy Lamb								PRESENT				Membranipora villosa					iNaturalist:360867								Membranipora villosa							Animalia	Bryozoa	Gymnolaemata	Cheilostomatida	Membraniporidae	Membranipora	villosa		species		Hincks, 1880
	imerss.org:PMLS:17600			Count: some		Andy Lamb								PRESENT				Schizoporella japonica					iNaturalist:519486								Schizoporella japonica							Animalia	Bryozoa	Gymnolaemata	Cheilostomatida	Schizoporellidae	Schizoporella	japonica		species		Ortmann, 1890
	imerss.org:PMLS:17601			Count: some		Andy Lamb								PRESENT				Dendrobeania murrayana					iNaturalist:205170								Dendrobeania murrayana							Animalia	Bryozoa	Gymnolaemata	Cheilostomatida	Bugulidae	Dendrobeania	murrayana		species		(Bean in Johnston, 1847)
	imerss.org:PMLS:17602			Count: few		Andy Lamb								PRESENT				Crisia spp.					iNaturalist:192680								Crisia							Animalia	Bryozoa	Stenolaemata	Cyclostomatida	Crisiidae	Crisia			genus
	imerss.org:PMLS:17711			Count: some		Andy Lamb								PRESENT				Membranipora villosa					iNaturalist:360867								Membranipora villosa							Animalia	Bryozoa	Gymnolaemata	Cheilostomatida	Membraniporidae	Membranipora	villosa		species		Hincks, 1880
	imerss.org:PMLS:17712					Andy Lamb		2						PRESENT				Bugulina californica					iNaturalist:551808								Bugulina californica							Animalia	Bryozoa	Gymnolaemata	Cheilostomatida	Bugulidae	Bugulina	californica		species		(Robertson, 1905)
	imerss.org:PMLS:17713			Count: some		Andy Lamb								PRESENT				Crisia spp.					iNaturalist:192680								Crisia							Animalia	Bryozoa	Stenolaemata	Cyclostomatida	Crisiidae	Crisia			genus
	imerss.org:PMLS:17786			Count: some		Andy Lamb								PRESENT				Membranipora villosa					iNaturalist:360867								Membranipora villosa							Animalia	Bryozoa	Gymnolaemata	Cheilostomatida	Membraniporidae	Membranipora	villosa		species		Hincks, 1880
	imerss.org:PMLS:17787			Count: some		Andy Lamb								PRESENT				Schizoporella japonica					iNaturalist:519486								Schizoporella japonica							Animalia	Bryozoa	Gymnolaemata	Cheilostomatida	Schizoporellidae	Schizoporella	japonica		species		Ortmann, 1890
	imerss.org:PMLS:17832			Count: some		Andy Lamb								PRESENT				Schizoporella japonica					iNaturalist:519486								Schizoporella japonica							Animalia	Bryozoa	Gymnolaemata	Cheilostomatida	Schizoporellidae	Schizoporella	japonica		species		Ortmann, 1890
	imerss.org:PMLS:17833			Count: some		Andy Lamb								PRESENT				Crisia spp.					iNaturalist:192680								Crisia							Animalia	Bryozoa	Stenolaemata	Cyclostomatida	Crisiidae	Crisia			genus
	imerss.org:PMLS:17982			Count: some		Andy Lamb								PRESENT				Crisia spp.					iNaturalist:192680								Crisia							Animalia	Bryozoa	Stenolaemata	Cyclostomatida	Crisiidae	Crisia			genus
	imerss.org:PMLS:17983			Count: some		Andy Lamb								PRESENT				Diaperoforma californica					iNaturalist:345872								Diaperoforma californica							Animalia	Bryozoa	Stenolaemata	Cyclostomatida		Diaperoforma	californica		species		(d'Orbigny, 1853)
	imerss.org:PMLS:18058			Count: some		Andy Lamb								PRESENT				Schizoporella japonica					iNaturalist:519486								Schizoporella japonica							Animalia	Bryozoa	Gymnolaemata	Cheilostomatida	Schizoporellidae	Schizoporella	japonica		species		Ortmann, 1890
	imerss.org:PMLS:18059					Andy Lamb		3						PRESENT				Crisia spp.					iNaturalist:192680								Crisia							Animalia	Bryozoa	Stenolaemata	Cyclostomatida	Crisiidae	Crisia			genus
	imerss.org:PMLS:18150			Count: some		Andy Lamb								PRESENT				Schizoporella japonica					iNaturalist:519486								Schizoporella japonica							Animalia	Bryozoa	Gymnolaemata	Cheilostomatida	Schizoporellidae	Schizoporella	japonica		species		Ortmann, 1890
	imerss.org:PMLS:18151					Andy Lamb		2						PRESENT				Crisia spp.					iNaturalist:192680								Crisia							Animalia	Bryozoa	Stenolaemata	Cyclostomatida	Crisiidae	Crisia			genus
	imerss.org:PMLS:18152					Andy Lamb		3						PRESENT				Heteropora pacifica					iNaturalist:465163								Heteropora pacifica							Animalia	Bryozoa	Stenolaemata	Cyclostomatida	Heteroporidae	Heteropora	pacifica		species		Borg, 1933
	imerss.org:PMLS:18260			Count: few		Andy Lamb								PRESENT				Heteropora pacifica					iNaturalist:465163								Heteropora pacifica							Animalia	Bryozoa	Stenolaemata	Cyclostomatida	Heteroporidae	Heteropora	pacifica		species		Borg, 1933
	imerss.org:PMLS:18335			Count: few		Andy Lamb								PRESENT				Bugulina californica					iNaturalist:551808								Bugulina californica							Animalia	Bryozoa	Gymnolaemata	Cheilostomatida	Bugulidae	Bugulina	californica		species		(Robertson, 1905)
	imerss.org:PMLS:18336			Count: few		Andy Lamb								PRESENT				Crisia spp.					iNaturalist:192680								Crisia							Animalia	Bryozoa	Stenolaemata	Cyclostomatida	Crisiidae	Crisia			genus
	imerss.org:PMLS:18475					Isabelle Cote								PRESENT				Primavelans insculpta					iNaturalist:429861								Primavelans insculpta							Animalia	Bryozoa	Gymnolaemata	Cheilostomatida	Pacificincolidae	Primavelans	insculpta		species		(Hincks, 1883)
	imerss.org:PMLS:18538					Isabelle Cote								PRESENT				Phidolopora pacifica					iNaturalist:51796								Phidolopora pacifica							Animalia	Bryozoa	Gymnolaemata	Cheilostomatida	Phidoloporidae	Phidolopora	pacifica		species		(Robertson, 1908)
	imerss.org:PMLS:18571			Count: few		Stefania Gorgopa								PRESENT				Bugulina californica					iNaturalist:551808								Bugulina californica							Animalia	Bryozoa	Gymnolaemata	Cheilostomatida	Bugulidae	Bugulina	californica		species		(Robertson, 1905)
	imerss.org:iNat:7674532					Karolle Wall								PRESENT				Bugulina californica					iNaturalist:551808								Bugulina californica							Animalia	Bryozoa	Gymnolaemata	Cheilostomatida	Bugulidae	Bugulina	californica		species		(Robertson, 1905)
	imerss.org:iNat:24768697													PRESENT				Schizoporella japonica					iNaturalist:519486								Schizoporella japonica							Animalia	Bryozoa	Gymnolaemata	Cheilostomatida	Schizoporellidae	Schizoporella	japonica		species		Ortmann, 1890
	imerss.org:iNat:30012077					Galiano observer								PRESENT				Bugulina californica					iNaturalist:551808								Bugulina californica							Animalia	Bryozoa	Gymnolaemata	Cheilostomatida	Bugulidae	Bugulina	californica		species		(Robertson, 1905)
	imerss.org:iNat:30217323					Andrew Simon								PRESENT				Membranipora villosa					iNaturalist:360867								Membranipora villosa							Animalia	Bryozoa	Gymnolaemata	Cheilostomatida	Membraniporidae	Membranipora	villosa		species		Hincks, 1880
[truncated: 105 more columns]

## Sheet: ExternalLinks
Taxon_Local_ID	Link type	Link
