# Supplementary material for: Toward an atlas of Salish Sea biodiversity: the flora and fauna of Galiano Island, British Columbia, Canada. Part I. Marine zoology
Source: Biodivers Data J. 2022 Mar 10;10:e76050. doi: 10.3897/BDJ.10.e76050 (PMC8930920; doi:10.3897/BDJ.10.e76050)
Supplement: Supplementary material 19 — Chondrichthyes of Galiano Island, British Columbia, Canada [file bdj-10-e76050-s019.xlsx]

## Sheet: Taxa
Taxon_Local_ID	Kingdom	Subkingdom	Phylum	Subphylum	Superclass	Class	Subclass	Superorder	Order	Suborder	Infraorder	Superfamily	Family	Subfamily	Tribe	Subtribe	Genus	Subgenus	Species	Subspecies	Variety	Form	Authorship	Nomenclature	Feeds on	symbioticWith	parasiteOf	Host of	Native Status	Conservation Status	Distribution	Horizon	Notes
607477	Animalia		Chordata	Vertebrata		Elasmobranchii	Neoselachii		Rajiformes				Rajidae				Beringraja		binoculata				(Girard, 1855)
883875	Animalia		Chordata	Vertebrata		Elasmobranchii	Neoselachii		Rajiformes				Rajidae				Beringraja		rhina				(Jordan & Gilbert, 1880)
201523	Animalia		Chordata	Vertebrata		Elasmobranchii	Neoselachii	Squalomorphi	Squaliformes				Squalidae				Squalus		suckleyi				(Girard, 1855)										Reported as Squalus acanthias (CMNFI 1985-0086.5) in CMN records; Squalus suckleyi replaces Squalus acanthias in the NEP.
84182	Animalia		Chordata	Vertebrata		Holocephali			Chimaeriformes				Chimaeridae				Hydrolagus		colliei				(Lay & Bennett, 1839)

## Sheet: Materials
typeStatus	occurrenceID	catalogNumber	occurrenceDetails	occurrenceRemarks	recordNumber	recordedBy	individualID	individualCount	sex	lifeStage	reproductiveCondition	behavior	establishmentMeans	occurrenceStatus	preparations	disposition	otherCatalogNumbers	previousIdentifications	associatedMedia	associatedReferences	associatedOccurrences	associatedSequences	taxonID	scientificNameID	acceptedNameUsageID	parentNameUsageID	originalNameUsageID	nameAccordingToID	namePublishedInID	taxonConceptID	scientificName	acceptedNameUsage	parentNameUsage	originalNameUsage	nameAccordingTo	namePublishedIn	higherClassification	kingdom	phylum	class	order	family	genus	specificEpithet	infraspecificEpithet	taxonRank	verbatimTaxonRank	scientificNameAuthorship	vernacularName
	imerss.org:PMLS:121					Andy Lamb								PRESENT				Hydrolagus colliei					iNaturalist:84182								Hydrolagus colliei							Animalia	Chordata	Holocephali	Chimaeriformes	Chimaeridae	Hydrolagus	colliei		species		(Lay & Bennett, 1839)
	imerss.org:PMLS:177					Andy Lamb								PRESENT				Squalus suckleyi					iNaturalist:201523								Squalus suckleyi							Animalia	Chordata	Elasmobranchii	Squaliformes	Squalidae	Squalus	suckleyi		species		(Girard, 1855)
	imerss.org:PMLS:215					Andy Lamb								PRESENT				Squalus suckleyi					iNaturalist:201523								Squalus suckleyi							Animalia	Chordata	Elasmobranchii	Squaliformes	Squalidae	Squalus	suckleyi		species		(Girard, 1855)
	imerss.org:PMLS:1352					Charlie Gibbs								PRESENT				Beringraja binoculata					iNaturalist:607477								Beringraja binoculata							Animalia	Chordata	Elasmobranchii	Rajiformes	Rajidae	Beringraja	binoculata		species		(Girard, 1855)
	imerss.org:PMLS:13939					Andy Lamb		1						PRESENT				Beringraja rhina					iNaturalist:883875								Beringraja rhina							Animalia	Chordata	Elasmobranchii	Rajiformes	Rajidae	Beringraja	rhina		species		(Jordan & Gilbert, 1880)
	imerss.org:PMLS:14510					Andy Lamb		1						PRESENT				Squalus suckleyi					iNaturalist:201523								Squalus suckleyi							Animalia	Chordata	Elasmobranchii	Squaliformes	Squalidae	Squalus	suckleyi		species		(Girard, 1855)
	imerss.org:PMLS:14788					Andy Lamb		1						PRESENT				Squalus suckleyi					iNaturalist:201523								Squalus suckleyi							Animalia	Chordata	Elasmobranchii	Squaliformes	Squalidae	Squalus	suckleyi		species		(Girard, 1855)
	imerss.org:iNat:8898612					Tyson Ehlers								PRESENT				Squalus suckleyi					iNaturalist:201523								Squalus suckleyi							Animalia	Chordata	Elasmobranchii	Squaliformes	Squalidae	Squalus	suckleyi		species		(Girard, 1855)
	imerss.org:iNat:54324385					vickie gould								PRESENT				Squalus suckleyi					iNaturalist:201523								Squalus suckleyi							Animalia	Chordata	Elasmobranchii	Squaliformes	Squalidae	Squalus	suckleyi		species		(Girard, 1855)
	imerss.org:iNat:59908560					Jackson W.F. Chu								PRESENT				Hydrolagus colliei					iNaturalist:84182								Hydrolagus colliei							Animalia	Chordata	Holocephali	Chimaeriformes	Chimaeridae	Hydrolagus	colliei		species		(Lay & Bennett, 1839)
	imerss.org:iNat:60467712					Jackson W.F. Chu								PRESENT				Hydrolagus colliei					iNaturalist:84182								Hydrolagus colliei							Animalia	Chordata	Holocephali	Chimaeriformes	Chimaeridae	Hydrolagus	colliei		species		(Lay & Bennett, 1839)
	imerss.org:iNat:60468754					Jackson W.F. Chu								PRESENT				Hydrolagus colliei					iNaturalist:84182								Hydrolagus colliei							Animalia	Chordata	Holocephali	Chimaeriformes	Chimaeridae	Hydrolagus	colliei		species		(Lay & Bennett, 1839)
	imerss.org:iNat:61341020					Jackson W.F. Chu								PRESENT				Hydrolagus colliei					iNaturalist:84182								Hydrolagus colliei							Animalia	Chordata	Holocephali	Chimaeriformes	Chimaeridae	Hydrolagus	colliei		species		(Lay & Bennett, 1839)
	imerss.org:CMN:CMNFI 1985-0086.5	CMNFI 1985-0086.5				Kasserra, Claudia E.		5						PRESENT				Squalus acanthias					iNaturalist:201523								Squalus suckleyi							Animalia	Chordata	Elasmobranchii	Squaliformes	Squalidae	Squalus	suckleyi		species		(Girard, 1855)
	imerss.org:CHU2010:18764					Jackson W.F. Chu		1						PRESENT				Hydrolagus colliei		Chu JWF, Leys SP (2010) High resolution mapping of community structure in three glass sponge reefs (Porifera, Hexactinellida). Marine Ecology Progress Series 417: 97‑113. https://doi.org/10.7939/r36k3q			iNaturalist:84182								Hydrolagus colliei							Animalia	Chordata	Holocephali	Chimaeriformes	Chimaeridae	Hydrolagus	colliei		species		(Lay & Bennett, 1839)
	imerss.org:CHU2010:18778					Jackson W.F. Chu		1						PRESENT				Hydrolagus colliei		Chu JWF, Leys SP (2010) High resolution mapping of community structure in three glass sponge reefs (Porifera, Hexactinellida). Marine Ecology Progress Series 417: 97‑113. https://doi.org/10.7939/r36k3q			iNaturalist:84182								Hydrolagus colliei							Animalia	Chordata	Holocephali	Chimaeriformes	Chimaeridae	Hydrolagus	colliei		species		(Lay & Bennett, 1839)
	imerss.org:CHU2010:18785					Jackson W.F. Chu		2						PRESENT				Hydrolagus colliei		Chu JWF, Leys SP (2010) High resolution mapping of community structure in three glass sponge reefs (Porifera, Hexactinellida). Marine Ecology Progress Series 417: 97‑113. https://doi.org/10.7939/r36k3q			iNaturalist:84182								Hydrolagus colliei							Animalia	Chordata	Holocephali	Chimaeriformes	Chimaeridae	Hydrolagus	colliei		species		(Lay & Bennett, 1839)
	imerss.org:CHU2010:18786					Jackson W.F. Chu		1						PRESENT				Hydrolagus colliei		Chu JWF, Leys SP (2010) High resolution mapping of community structure in three glass sponge reefs (Porifera, Hexactinellida). Marine Ecology Progress Series 417: 97‑113. https://doi.org/10.7939/r36k3q			iNaturalist:84182								Hydrolagus colliei							Animalia	Chordata	Holocephali	Chimaeriformes	Chimaeridae	Hydrolagus	colliei		species		(Lay & Bennett, 1839)
	imerss.org:CHU2010:18844					Jackson W.F. Chu		1						PRESENT				Hydrolagus colliei		Chu JWF, Leys SP (2010) High resolution mapping of community structure in three glass sponge reefs (Porifera, Hexactinellida). Marine Ecology Progress Series 417: 97‑113. https://doi.org/10.7939/r36k3q			iNaturalist:84182								Hydrolagus colliei							Animalia	Chordata	Holocephali	Chimaeriformes	Chimaeridae	Hydrolagus	colliei		species		(Lay & Bennett, 1839)
	imerss.org:CHU2010:18856					Jackson W.F. Chu		1						PRESENT				Hydrolagus colliei		Chu JWF, Leys SP (2010) High resolution mapping of community structure in three glass sponge reefs (Porifera, Hexactinellida). Marine Ecology Progress Series 417: 97‑113. https://doi.org/10.7939/r36k3q			iNaturalist:84182								Hydrolagus colliei							Animalia	Chordata	Holocephali	Chimaeriformes	Chimaeridae	Hydrolagus	colliei		species		(Lay & Bennett, 1839)
	imerss.org:CHU2010:18871					Jackson W.F. Chu		1						PRESENT				Hydrolagus colliei		Chu JWF, Leys SP (2010) High resolution mapping of community structure in three glass sponge reefs (Porifera, Hexactinellida). Marine Ecology Progress Series 417: 97‑113. https://doi.org/10.7939/r36k3q			iNaturalist:84182								Hydrolagus colliei							Animalia	Chordata	Holocephali	Chimaeriformes	Chimaeridae	Hydrolagus	colliei		species		(Lay & Bennett, 1839)
	imerss.org:CHU2010:18893					Jackson W.F. Chu		1						PRESENT				Hydrolagus colliei		Chu JWF, Leys SP (2010) High resolution mapping of community structure in three glass sponge reefs (Porifera, Hexactinellida). Marine Ecology Progress Series 417: 97‑113. https://doi.org/10.7939/r36k3q			iNaturalist:84182								Hydrolagus colliei							Animalia	Chordata	Holocephali	Chimaeriformes	Chimaeridae	Hydrolagus	colliei		species		(Lay & Bennett, 1839)
	imerss.org:CHU2010:19114					Jackson W.F. Chu		1						PRESENT				Hydrolagus colliei		Chu JWF, Leys SP (2010) High resolution mapping of community structure in three glass sponge reefs (Porifera, Hexactinellida). Marine Ecology Progress Series 417: 97‑113. https://doi.org/10.7939/r36k3q			iNaturalist:84182								Hydrolagus colliei							Animalia	Chordata	Holocephali	Chimaeriformes	Chimaeridae	Hydrolagus	colliei		species		(Lay & Bennett, 1839)
	imerss.org:CHU2010:19153					Jackson W.F. Chu		1						PRESENT				Hydrolagus colliei		Chu JWF, Leys SP (2010) High resolution mapping of community structure in three glass sponge reefs (Porifera, Hexactinellida). Marine Ecology Progress Series 417: 97‑113. https://doi.org/10.7939/r36k3q			iNaturalist:84182								Hydrolagus colliei							Animalia	Chordata	Holocephali	Chimaeriformes	Chimaeridae	Hydrolagus	colliei		species		(Lay & Bennett, 1839)
	imerss.org:CHU2010:19196					Jackson W.F. Chu		1						PRESENT				Hydrolagus colliei		Chu JWF, Leys SP (2010) High resolution mapping of community structure in three glass sponge reefs (Porifera, Hexactinellida). Marine Ecology Progress Series 417: 97‑113. https://doi.org/10.7939/r36k3q			iNaturalist:84182								Hydrolagus colliei							Animalia	Chordata	Holocephali	Chimaeriformes	Chimaeridae	Hydrolagus	colliei		species		(Lay & Bennett, 1839)
[truncated: 105 more columns]

## Sheet: ExternalLinks
Taxon_Local_ID	Link type	Link
