# Supplementary material for: Toward an atlas of Salish Sea biodiversity: the flora and fauna of Galiano Island, British Columbia, Canada. Part I. Marine zoology
Source: Biodivers Data J. 2022 Mar 10;10:e76050. doi: 10.3897/BDJ.10.e76050 (PMC8930920; doi:10.3897/BDJ.10.e76050)
Supplement: Supplementary material 20 — Mammalia of Galiano Island, British Columbia, Canada [file bdj-10-e76050-s020.xlsx]

## Sheet: Taxa
Taxon_Local_ID	Kingdom	Subkingdom	Phylum	Subphylum	Superclass	Class	Subclass	Superorder	Order	Suborder	Infraorder	Superfamily	Family	Subfamily	Tribe	Subtribe	Genus	Subgenus	Species	Subspecies	Variety	Form	Authorship	Nomenclature	Feeds on	symbioticWith	parasiteOf	Host of	Native Status	Conservation Status	Distribution	Horizon	Notes
41550	Animalia		Chordata	Vertebrata		Mammalia	Theria	Laurasiatheria	Artiodactyla	Whippomorpha	Cetacea		Balaenopteridae				Balaenoptera		acutorostrata				Lacépède, 1804
41562	Animalia		Chordata	Vertebrata		Mammalia	Theria	Laurasiatheria	Artiodactyla	Whippomorpha	Cetacea		Balaenopteridae				Balaenoptera		physalus				(Linnaeus, 1758)
41566	Animalia		Chordata	Vertebrata		Mammalia	Theria	Laurasiatheria	Artiodactyla	Whippomorpha	Cetacea		Balaenopteridae				Megaptera		novaeangliae				(Borowski, 1781)
41478	Animalia		Chordata	Vertebrata		Mammalia	Theria	Laurasiatheria	Artiodactyla	Whippomorpha	Cetacea		Eschrichtiidae				Eschrichtius		robustus				(Lilljeborg, 1861)
41510	Animalia		Chordata	Vertebrata		Mammalia	Theria	Laurasiatheria	Artiodactyla	Whippomorpha	Cetacea	Delphinoidea	Delphinidae				Lagenorhynchus		obliquidens				Gill, 1865
41521	Animalia		Chordata	Vertebrata		Mammalia	Theria	Laurasiatheria	Artiodactyla	Whippomorpha	Cetacea	Delphinoidea	Delphinidae				Orcinus		orca				(Linnaeus, 1758)
41440	Animalia		Chordata	Vertebrata		Mammalia	Theria	Laurasiatheria	Artiodactyla	Whippomorpha	Cetacea	Delphinoidea	Phocoenidae				Phocoena		phocoena				(Linnaeus, 1758)
41446	Animalia		Chordata	Vertebrata		Mammalia	Theria	Laurasiatheria	Artiodactyla	Whippomorpha	Cetacea	Delphinoidea	Phocoenidae				Phocoenoides		dalli				(True, 1885)
41777	Animalia		Chordata	Vertebrata		Mammalia	Theria	Laurasiatheria	Carnivora				Mustelidae	Lutrinae			Lontra		canadensis				Schreber, 1777
1264432	Animalia		Chordata	Vertebrata		Mammalia	Theria	Laurasiatheria	Carnivora				Mustelidae	Mustelinae			Neogale		vison				(Schreber, 1777)
41755	Animalia		Chordata	Vertebrata		Mammalia	Theria	Laurasiatheria	Carnivora				Otariidae				Eumetopias		jubatus				(Schreber, 1776)
41740	Animalia		Chordata	Vertebrata		Mammalia	Theria	Laurasiatheria	Carnivora				Otariidae				Zalophus		californianus				(Lesson, 1828)
117766	Animalia		Chordata	Vertebrata		Mammalia	Theria	Laurasiatheria	Carnivora				Phocidae				Phoca		vitulina	richardii			Gray, 1864

## Sheet: Materials
typeStatus	occurrenceID	catalogNumber	occurrenceDetails	occurrenceRemarks	recordNumber	recordedBy	individualID	individualCount	sex	lifeStage	reproductiveCondition	behavior	establishmentMeans	occurrenceStatus	preparations	disposition	otherCatalogNumbers	previousIdentifications	associatedMedia	associatedReferences	associatedOccurrences	associatedSequences	taxonID	scientificNameID	acceptedNameUsageID	parentNameUsageID	originalNameUsageID	nameAccordingToID	namePublishedInID	taxonConceptID	scientificName	acceptedNameUsage	parentNameUsage	originalNameUsage	nameAccordingTo	namePublishedIn	higherClassification	kingdom	phylum	class	order	family	genus	specificEpithet	infraspecificEpithet	taxonRank	verbatimTaxonRank	scientificNameAuthorship	vernacularName
	imerss.org:PMLS:557					Andy Lamb								PRESENT				Eumetopias jubatus					iNaturalist:41755								Eumetopias jubatus							Animalia	Chordata	Mammalia	Carnivora	Otariidae	Eumetopias	jubatus		species		(Schreber, 1776)
	imerss.org:PMLS:1551					Charlie Gibbs								PRESENT				Phoca vitulina richardii					iNaturalist:117766								Phoca vitulina richardii							Animalia	Chordata	Mammalia	Carnivora	Phocidae	Phoca	vitulina	richardii	subspecies		Gray, 1864
	imerss.org:PMLS:4074					Andy Lamb		1						PRESENT				Eumetopias jubatus					iNaturalist:41755								Eumetopias jubatus							Animalia	Chordata	Mammalia	Carnivora	Otariidae	Eumetopias	jubatus		species		(Schreber, 1776)
	imerss.org:PMLS:5029					Andy Lamb		1						PRESENT				Eumetopias jubatus					iNaturalist:41755								Eumetopias jubatus							Animalia	Chordata	Mammalia	Carnivora	Otariidae	Eumetopias	jubatus		species		(Schreber, 1776)
	imerss.org:PMLS:5555					Andy Lamb		1						PRESENT				Phoca vitulina richardii					iNaturalist:117766								Phoca vitulina richardii							Animalia	Chordata	Mammalia	Carnivora	Phocidae	Phoca	vitulina	richardii	subspecies		Gray, 1864
	imerss.org:PMLS:5629					Andy Lamb		1						PRESENT				Eumetopias jubatus					iNaturalist:41755								Eumetopias jubatus							Animalia	Chordata	Mammalia	Carnivora	Otariidae	Eumetopias	jubatus		species		(Schreber, 1776)
	imerss.org:PMLS:9723					Andy Lamb		1						PRESENT				Eumetopias jubatus					iNaturalist:41755								Eumetopias jubatus							Animalia	Chordata	Mammalia	Carnivora	Otariidae	Eumetopias	jubatus		species		(Schreber, 1776)
	imerss.org:PMLS:13124					Andy Lamb		1						PRESENT				Eumetopias jubatus					iNaturalist:41755								Eumetopias jubatus							Animalia	Chordata	Mammalia	Carnivora	Otariidae	Eumetopias	jubatus		species		(Schreber, 1776)
	imerss.org:PMLS:13760					Andy Lamb		3						PRESENT				Phoca vitulina richardii					iNaturalist:117766								Phoca vitulina richardii							Animalia	Chordata	Mammalia	Carnivora	Phocidae	Phoca	vitulina	richardii	subspecies		Gray, 1864
	imerss.org:PMLS:13840					Andy Lamb		1						PRESENT				Eumetopias jubatus					iNaturalist:41755								Eumetopias jubatus							Animalia	Chordata	Mammalia	Carnivora	Otariidae	Eumetopias	jubatus		species		(Schreber, 1776)
	imerss.org:PMLS:14928					Andy Lamb		1						PRESENT				Eumetopias jubatus					iNaturalist:41755								Eumetopias jubatus							Animalia	Chordata	Mammalia	Carnivora	Otariidae	Eumetopias	jubatus		species		(Schreber, 1776)
	imerss.org:PMLS:15029					Andy Lamb		1						PRESENT				Eumetopias jubatus					iNaturalist:41755								Eumetopias jubatus							Animalia	Chordata	Mammalia	Carnivora	Otariidae	Eumetopias	jubatus		species		(Schreber, 1776)
	imerss.org:PMLS:16471					Andy Lamb		1						PRESENT				Eumetopias jubatus					iNaturalist:41755								Eumetopias jubatus							Animalia	Chordata	Mammalia	Carnivora	Otariidae	Eumetopias	jubatus		species		(Schreber, 1776)
	imerss.org:PMLS:16652					Andy Lamb		1						PRESENT				Eumetopias jubatus					iNaturalist:41755								Eumetopias jubatus							Animalia	Chordata	Mammalia	Carnivora	Otariidae	Eumetopias	jubatus		species		(Schreber, 1776)
	imerss.org:PMLS:17085					Andy Lamb		4						PRESENT				Eumetopias jubatus					iNaturalist:41755								Eumetopias jubatus							Animalia	Chordata	Mammalia	Carnivora	Otariidae	Eumetopias	jubatus		species		(Schreber, 1776)
	imerss.org:iNat:730361					Andrew Simon								PRESENT				Lontra canadensis					iNaturalist:41777								Lontra canadensis							Animalia	Chordata	Mammalia	Carnivora	Mustelidae	Lontra	canadensis		species		Schreber, 1777
	imerss.org:iNat:731418					Andrew Simon								PRESENT				Phoca vitulina richardii					iNaturalist:117766								Phoca vitulina richardii							Animalia	Chordata	Mammalia	Carnivora	Phocidae	Phoca	vitulina	richardii	subspecies		Gray, 1864
	imerss.org:iNat:2565228					Lauren Magner								PRESENT				Phoca vitulina					iNaturalist:117766								Phoca vitulina richardii							Animalia	Chordata	Mammalia	Carnivora	Phocidae	Phoca	vitulina	richardii	subspecies		Gray, 1864
	imerss.org:iNat:2583362													PRESENT				Lontra canadensis					iNaturalist:41777								Lontra canadensis							Animalia	Chordata	Mammalia	Carnivora	Mustelidae	Lontra	canadensis		species		Schreber, 1777
	imerss.org:iNat:2635114													PRESENT				Lontra canadensis					iNaturalist:41777								Lontra canadensis							Animalia	Chordata	Mammalia	Carnivora	Mustelidae	Lontra	canadensis		species		Schreber, 1777
	imerss.org:iNat:2635258													PRESENT				Lontra canadensis					iNaturalist:41777								Lontra canadensis							Animalia	Chordata	Mammalia	Carnivora	Mustelidae	Lontra	canadensis		species		Schreber, 1777
	imerss.org:iNat:2635269													PRESENT				Lontra canadensis					iNaturalist:41777								Lontra canadensis							Animalia	Chordata	Mammalia	Carnivora	Mustelidae	Lontra	canadensis		species		Schreber, 1777
	imerss.org:iNat:2635275													PRESENT				Lontra canadensis					iNaturalist:41777								Lontra canadensis							Animalia	Chordata	Mammalia	Carnivora	Mustelidae	Lontra	canadensis		species		Schreber, 1777
	imerss.org:iNat:2635284													PRESENT				Lontra canadensis					iNaturalist:41777								Lontra canadensis							Animalia	Chordata	Mammalia	Carnivora	Mustelidae	Lontra	canadensis		species		Schreber, 1777
	imerss.org:iNat:2929506													PRESENT				Lontra canadensis					iNaturalist:41777								Lontra canadensis							Animalia	Chordata	Mammalia	Carnivora	Mustelidae	Lontra	canadensis		species		Schreber, 1777
	imerss.org:iNat:3059591													PRESENT				Phoca vitulina					iNaturalist:117766								Phoca vitulina richardii							Animalia	Chordata	Mammalia	Carnivora	Phocidae	Phoca	vitulina	richardii	subspecies		Gray, 1864
	imerss.org:iNat:3291897					KK								PRESENT				Orcinus orca					iNaturalist:41521								Orcinus orca							Animalia	Chordata	Mammalia	Artiodactyla	Delphinidae	Orcinus	orca		species		(Linnaeus, 1758)
	imerss.org:iNat:3598717													PRESENT				Orcinus orca					iNaturalist:41521								Orcinus orca							Animalia	Chordata	Mammalia	Artiodactyla	Delphinidae	Orcinus	orca		species		(Linnaeus, 1758)
	imerss.org:iNat:3598720													PRESENT				Zalophus californianus					iNaturalist:41740								Zalophus californianus							Animalia	Chordata	Mammalia	Carnivora	Otariidae	Zalophus	californianus		species		(Lesson, 1828)
	imerss.org:iNat:3684474													PRESENT				Phoca vitulina					iNaturalist:117766								Phoca vitulina richardii							Animalia	Chordata	Mammalia	Carnivora	Phocidae	Phoca	vitulina	richardii	subspecies		Gray, 1864
	imerss.org:iNat:3684489													PRESENT				Phoca vitulina					iNaturalist:117766								Phoca vitulina richardii							Animalia	Chordata	Mammalia	Carnivora	Phocidae	Phoca	vitulina	richardii	subspecies		Gray, 1864
	imerss.org:iNat:3840467													PRESENT				Phoca vitulina					iNaturalist:117766								Phoca vitulina richardii							Animalia	Chordata	Mammalia	Carnivora	Phocidae	Phoca	vitulina	richardii	subspecies		Gray, 1864
	imerss.org:iNat:3840468													PRESENT				Phoca vitulina					iNaturalist:117766								Phoca vitulina richardii							Animalia	Chordata	Mammalia	Carnivora	Phocidae	Phoca	vitulina	richardii	subspecies		Gray, 1864
	imerss.org:iNat:3840471													PRESENT				Phoca vitulina					iNaturalist:117766								Phoca vitulina richardii							Animalia	Chordata	Mammalia	Carnivora	Phocidae	Phoca	vitulina	richardii	subspecies		Gray, 1864
	imerss.org:iNat:4124479													PRESENT				Lontra canadensis					iNaturalist:41777								Lontra canadensis							Animalia	Chordata	Mammalia	Carnivora	Mustelidae	Lontra	canadensis		species		Schreber, 1777
	imerss.org:iNat:4160285					Mike								PRESENT				Phoca vitulina					iNaturalist:117766								Phoca vitulina richardii							Animalia	Chordata	Mammalia	Carnivora	Phocidae	Phoca	vitulina	richardii	subspecies		Gray, 1864
	imerss.org:iNat:4160291					Mike								PRESENT				Phoca vitulina					iNaturalist:117766								Phoca vitulina richardii							Animalia	Chordata	Mammalia	Carnivora	Phocidae	Phoca	vitulina	richardii	subspecies		Gray, 1864
	imerss.org:iNat:4727219													PRESENT				Phoca vitulina					iNaturalist:117766								Phoca vitulina richardii							Animalia	Chordata	Mammalia	Carnivora	Phocidae	Phoca	vitulina	richardii	subspecies		Gray, 1864
	imerss.org:iNat:4833811					Lauren Magner								PRESENT				Eumetopias jubatus					iNaturalist:41755								Eumetopias jubatus							Animalia	Chordata	Mammalia	Carnivora	Otariidae	Eumetopias	jubatus		species		(Schreber, 1776)
	imerss.org:iNat:4833849					Lauren Magner								PRESENT				Eumetopias jubatus					iNaturalist:41755								Eumetopias jubatus							Animalia	Chordata	Mammalia	Carnivora	Otariidae	Eumetopias	jubatus		species		(Schreber, 1776)
	imerss.org:iNat:4833935					Andrew Simon								PRESENT				Eumetopias jubatus					iNaturalist:41755								Eumetopias jubatus							Animalia	Chordata	Mammalia	Carnivora	Otariidae	Eumetopias	jubatus		species		(Schreber, 1776)
	imerss.org:iNat:4929630					Lauren Magner								PRESENT				Phoca vitulina					iNaturalist:117766								Phoca vitulina richardii							Animalia	Chordata	Mammalia	Carnivora	Phocidae	Phoca	vitulina	richardii	subspecies		Gray, 1864
	imerss.org:iNat:5165880					Andrew Simon								PRESENT				Phoca vitulina					iNaturalist:117766								Phoca vitulina richardii							Animalia	Chordata	Mammalia	Carnivora	Phocidae	Phoca	vitulina	richardii	subspecies		Gray, 1864
	imerss.org:iNat:5646953					Andrew Simon								PRESENT				Phoca vitulina					iNaturalist:117766								Phoca vitulina richardii							Animalia	Chordata	Mammalia	Carnivora	Phocidae	Phoca	vitulina	richardii	subspecies		Gray, 1864
	imerss.org:iNat:5676723					KK								PRESENT				Orcinus orca					iNaturalist:41521								Orcinus orca							Animalia	Chordata	Mammalia	Artiodactyla	Delphinidae	Orcinus	orca		species		(Linnaeus, 1758)
	imerss.org:iNat:6231117					Scott Gilmore								PRESENT				Phoca vitulina					iNaturalist:117766								Phoca vitulina richardii							Animalia	Chordata	Mammalia	Carnivora	Phocidae	Phoca	vitulina	richardii	subspecies		Gray, 1864
	imerss.org:iNat:6297697					Andrew Simon								PRESENT				Phoca vitulina richardii					iNaturalist:117766								Phoca vitulina richardii							Animalia	Chordata	Mammalia	Carnivora	Phocidae	Phoca	vitulina	richardii	subspecies		Gray, 1864
	imerss.org:iNat:6298735					Andrew Simon								PRESENT				Phoca vitulina					iNaturalist:117766								Phoca vitulina richardii							Animalia	Chordata	Mammalia	Carnivora	Phocidae	Phoca	vitulina	richardii	subspecies		Gray, 1864
	imerss.org:iNat:6425051					Andrew Simon								PRESENT				Lontra canadensis					iNaturalist:41777								Lontra canadensis							Animalia	Chordata	Mammalia	Carnivora	Mustelidae	Lontra	canadensis		species		Schreber, 1777
	imerss.org:iNat:6425101					Andrew Simon								PRESENT				Phoca vitulina					iNaturalist:117766								Phoca vitulina richardii							Animalia	Chordata	Mammalia	Carnivora	Phocidae	Phoca	vitulina	richardii	subspecies		Gray, 1864
	imerss.org:iNat:6425116					Andrew Simon								PRESENT				Zalophus californianus					iNaturalist:41740								Zalophus californianus							Animalia	Chordata	Mammalia	Carnivora	Otariidae	Zalophus	californianus		species		(Lesson, 1828)
	imerss.org:iNat:6425129					Andrew Simon								PRESENT				Lontra canadensis					iNaturalist:41777								Lontra canadensis							Animalia	Chordata	Mammalia	Carnivora	Mustelidae	Lontra	canadensis		species		Schreber, 1777
	imerss.org:iNat:6485976					Ayla M								PRESENT				Neogale vison					iNaturalist:1264432								Neogale vison							Animalia	Chordata	Mammalia	Carnivora	Mustelidae	Neogale	vison		species		(Schreber, 1777)
	imerss.org:iNat:6532303					Andrew Simon								PRESENT				Megaptera novaeangliae					iNaturalist:41566								Megaptera novaeangliae							Animalia	Chordata	Mammalia	Artiodactyla	Balaenopteridae	Megaptera	novaeangliae		species		(Borowski, 1781)
	imerss.org:iNat:6571302					Ayla M								PRESENT				Phoca vitulina					iNaturalist:117766								Phoca vitulina richardii							Animalia	Chordata	Mammalia	Carnivora	Phocidae	Phoca	vitulina	richardii	subspecies		Gray, 1864
	imerss.org:iNat:6611338					Ayla M								PRESENT				Lontra canadensis					iNaturalist:41777								Lontra canadensis							Animalia	Chordata	Mammalia	Carnivora	Mustelidae	Lontra	canadensis		species		Schreber, 1777
	imerss.org:iNat:7577694					Tony Wood								PRESENT				Phoca vitulina					iNaturalist:117766								Phoca vitulina richardii							Animalia	Chordata	Mammalia	Carnivora	Phocidae	Phoca	vitulina	richardii	subspecies		Gray, 1864
	imerss.org:iNat:7580656					Tony Wood								PRESENT				Phoca vitulina					iNaturalist:117766								Phoca vitulina richardii							Animalia	Chordata	Mammalia	Carnivora	Phocidae	Phoca	vitulina	richardii	subspecies		Gray, 1864
	imerss.org:iNat:7580929					Tony Wood								PRESENT				Lontra canadensis					iNaturalist:41777								Lontra canadensis							Animalia	Chordata	Mammalia	Carnivora	Mustelidae	Lontra	canadensis		species		Schreber, 1777
	imerss.org:iNat:7581543					Tony Wood								PRESENT				Lontra canadensis					iNaturalist:41777								Lontra canadensis							Animalia	Chordata	Mammalia	Carnivora	Mustelidae	Lontra	canadensis		species		Schreber, 1777
	imerss.org:iNat:7917880					Bob McDougall								PRESENT				Phoca vitulina					iNaturalist:117766								Phoca vitulina richardii							Animalia	Chordata	Mammalia	Carnivora	Phocidae	Phoca	vitulina	richardii	subspecies		Gray, 1864
	imerss.org:iNat:9244784					Kevin Toomer								PRESENT				Orcinus orca					iNaturalist:41521								Orcinus orca							Animalia	Chordata	Mammalia	Artiodactyla	Delphinidae	Orcinus	orca		species		(Linnaeus, 1758)
	imerss.org:iNat:9261151					Kevin Toomer								PRESENT				Phoca vitulina					iNaturalist:117766								Phoca vitulina richardii							Animalia	Chordata	Mammalia	Carnivora	Phocidae	Phoca	vitulina	richardii	subspecies		Gray, 1864
	imerss.org:iNat:10396563					Dana								PRESENT				Orcinus orca					iNaturalist:41521								Orcinus orca							Animalia	Chordata	Mammalia	Artiodactyla	Delphinidae	Orcinus	orca		species		(Linnaeus, 1758)
	imerss.org:iNat:10714107					Kevin Toomer								PRESENT				Phoca vitulina					iNaturalist:117766								Phoca vitulina richardii							Animalia	Chordata	Mammalia	Carnivora	Phocidae	Phoca	vitulina	richardii	subspecies		Gray, 1864
	imerss.org:iNat:13094546					Maria								PRESENT				Orcinus orca					iNaturalist:41521								Orcinus orca							Animalia	Chordata	Mammalia	Artiodactyla	Delphinidae	Orcinus	orca		species		(Linnaeus, 1758)
	imerss.org:iNat:13431794					Kevin Toomer								PRESENT				Megaptera novaeangliae					iNaturalist:41566								Megaptera novaeangliae							Animalia	Chordata	Mammalia	Artiodactyla	Balaenopteridae	Megaptera	novaeangliae		species		(Borowski, 1781)
	imerss.org:iNat:16335612					Ian McMaster								PRESENT				Orcinus orca					iNaturalist:41521								Orcinus orca							Animalia	Chordata	Mammalia	Artiodactyla	Delphinidae	Orcinus	orca		species		(Linnaeus, 1758)
	imerss.org:iNat:16404660					Karen Steve Smith								PRESENT				Lontra canadensis					iNaturalist:41777								Lontra canadensis							Animalia	Chordata	Mammalia	Carnivora	Mustelidae	Lontra	canadensis		species		Schreber, 1777
	imerss.org:iNat:16407423					Karen Steve Smith								PRESENT				Eumetopias jubatus					iNaturalist:41755								Eumetopias jubatus							Animalia	Chordata	Mammalia	Carnivora	Otariidae	Eumetopias	jubatus		species		(Schreber, 1776)
	imerss.org:iNat:16745581					Jerome Ko								PRESENT				Phoca vitulina					iNaturalist:117766								Phoca vitulina richardii							Animalia	Chordata	Mammalia	Carnivora	Phocidae	Phoca	vitulina	richardii	subspecies		Gray, 1864
	imerss.org:iNat:17235865					Brian Starzomski								PRESENT				Phoca vitulina					iNaturalist:117766								Phoca vitulina richardii							Animalia	Chordata	Mammalia	Carnivora	Phocidae	Phoca	vitulina	richardii	subspecies		Gray, 1864
	imerss.org:iNat:17772044													PRESENT				Orcinus orca					iNaturalist:41521								Orcinus orca							Animalia	Chordata	Mammalia	Artiodactyla	Delphinidae	Orcinus	orca		species		(Linnaeus, 1758)
	imerss.org:iNat:17772045													PRESENT				Orcinus orca					iNaturalist:41521								Orcinus orca							Animalia	Chordata	Mammalia	Artiodactyla	Delphinidae	Orcinus	orca		species		(Linnaeus, 1758)
	imerss.org:iNat:17772046													PRESENT				Orcinus orca					iNaturalist:41521								Orcinus orca							Animalia	Chordata	Mammalia	Artiodactyla	Delphinidae	Orcinus	orca		species		(Linnaeus, 1758)
	imerss.org:iNat:18663974													PRESENT				Orcinus orca					iNaturalist:41521								Orcinus orca							Animalia	Chordata	Mammalia	Artiodactyla	Delphinidae	Orcinus	orca		species		(Linnaeus, 1758)
	imerss.org:iNat:18987230					Donna Talluto								PRESENT				Phoca vitulina					iNaturalist:117766								Phoca vitulina richardii							Animalia	Chordata	Mammalia	Carnivora	Phocidae	Phoca	vitulina	richardii	subspecies		Gray, 1864
	imerss.org:iNat:19202276					Adam J								PRESENT				Phoca vitulina					iNaturalist:117766								Phoca vitulina richardii							Animalia	Chordata	Mammalia	Carnivora	Phocidae	Phoca	vitulina	richardii	subspecies		Gray, 1864
	imerss.org:iNat:19202316					Adam J								PRESENT				Eumetopias jubatus					iNaturalist:41755								Eumetopias jubatus							Animalia	Chordata	Mammalia	Carnivora	Otariidae	Eumetopias	jubatus		species		(Schreber, 1776)
	imerss.org:iNat:19963152					Donna Talluto								PRESENT				Lontra canadensis					iNaturalist:41777								Lontra canadensis							Animalia	Chordata	Mammalia	Carnivora	Mustelidae	Lontra	canadensis		species		Schreber, 1777
	imerss.org:iNat:20313581					Andrew Simon								PRESENT				Phoca vitulina					iNaturalist:117766								Phoca vitulina richardii							Animalia	Chordata	Mammalia	Carnivora	Phocidae	Phoca	vitulina	richardii	subspecies		Gray, 1864
	imerss.org:iNat:20823097					Jonah Timms								PRESENT				Lontra canadensis					iNaturalist:41777								Lontra canadensis							Animalia	Chordata	Mammalia	Carnivora	Mustelidae	Lontra	canadensis		species		Schreber, 1777
	imerss.org:iNat:21351432													PRESENT				Phoca vitulina					iNaturalist:117766								Phoca vitulina richardii							Animalia	Chordata	Mammalia	Carnivora	Phocidae	Phoca	vitulina	richardii	subspecies		Gray, 1864
	imerss.org:iNat:21442987					Andrew Simon								PRESENT				Eumetopias jubatus					iNaturalist:41755								Eumetopias jubatus							Animalia	Chordata	Mammalia	Carnivora	Otariidae	Eumetopias	jubatus		species		(Schreber, 1776)
	imerss.org:iNat:21616577					Karen Steve Smith								PRESENT				Phocoena phocoena					iNaturalist:41440								Phocoena phocoena							Animalia	Chordata	Mammalia	Artiodactyla	Phocoenidae	Phocoena	phocoena		species		(Linnaeus, 1758)
	imerss.org:iNat:22642612													PRESENT				Lontra canadensis					iNaturalist:41777								Lontra canadensis							Animalia	Chordata	Mammalia	Carnivora	Mustelidae	Lontra	canadensis		species		Schreber, 1777
	imerss.org:iNat:22842730													PRESENT				Lontra canadensis					iNaturalist:41777								Lontra canadensis							Animalia	Chordata	Mammalia	Carnivora	Mustelidae	Lontra	canadensis		species		Schreber, 1777
	imerss.org:iNat:24259194					Andrew Simon								PRESENT				Zalophus californianus					iNaturalist:41740								Zalophus californianus							Animalia	Chordata	Mammalia	Carnivora	Otariidae	Zalophus	californianus		species		(Lesson, 1828)
	imerss.org:iNat:24702030					Jason Headley								PRESENT				Phoca vitulina richardii					iNaturalist:117766								Phoca vitulina richardii							Animalia	Chordata	Mammalia	Carnivora	Phocidae	Phoca	vitulina	richardii	subspecies		Gray, 1864
	imerss.org:iNat:24703213					Jason Headley								PRESENT				Phoca vitulina richardii					iNaturalist:117766								Phoca vitulina richardii							Animalia	Chordata	Mammalia	Carnivora	Phocidae	Phoca	vitulina	richardii	subspecies		Gray, 1864
	imerss.org:iNat:24703244					Jason Headley								PRESENT				Eumetopias jubatus					iNaturalist:41755								Eumetopias jubatus							Animalia	Chordata	Mammalia	Carnivora	Otariidae	Eumetopias	jubatus		species		(Schreber, 1776)
	imerss.org:iNat:24708396													PRESENT				Phoca vitulina					iNaturalist:117766								Phoca vitulina richardii							Animalia	Chordata	Mammalia	Carnivora	Phocidae	Phoca	vitulina	richardii	subspecies		Gray, 1864
	imerss.org:iNat:24714323													PRESENT				Phoca vitulina					iNaturalist:117766								Phoca vitulina richardii							Animalia	Chordata	Mammalia	Carnivora	Phocidae	Phoca	vitulina	richardii	subspecies		Gray, 1864
	imerss.org:iNat:24714546					Katie Kushneryk								PRESENT				Phoca vitulina					iNaturalist:117766								Phoca vitulina richardii							Animalia	Chordata	Mammalia	Carnivora	Phocidae	Phoca	vitulina	richardii	subspecies		Gray, 1864
	imerss.org:iNat:24748307													PRESENT				Lontra canadensis					iNaturalist:41777								Lontra canadensis							Animalia	Chordata	Mammalia	Carnivora	Mustelidae	Lontra	canadensis		species		Schreber, 1777
	imerss.org:iNat:24857240													PRESENT				Phoca vitulina					iNaturalist:117766								Phoca vitulina richardii							Animalia	Chordata	Mammalia	Carnivora	Phocidae	Phoca	vitulina	richardii	subspecies		Gray, 1864
	imerss.org:iNat:24870119					John D Reynolds								PRESENT				Phoca vitulina					iNaturalist:117766								Phoca vitulina richardii							Animalia	Chordata	Mammalia	Carnivora	Phocidae	Phoca	vitulina	richardii	subspecies		Gray, 1864
	imerss.org:iNat:24957462					Nomadkris								PRESENT				Neogale vison					iNaturalist:1264432								Neogale vison							Animalia	Chordata	Mammalia	Carnivora	Mustelidae	Neogale	vison		species		(Schreber, 1777)
	imerss.org:iNat:26396676					Tim Hirsch								PRESENT				Phoca vitulina richardii					iNaturalist:117766								Phoca vitulina richardii							Animalia	Chordata	Mammalia	Carnivora	Phocidae	Phoca	vitulina	richardii	subspecies		Gray, 1864
	imerss.org:iNat:27458719													PRESENT				Phoca vitulina					iNaturalist:117766								Phoca vitulina richardii							Animalia	Chordata	Mammalia	Carnivora	Phocidae	Phoca	vitulina	richardii	subspecies		Gray, 1864
	imerss.org:iNat:27469833					Katie Kushneryk								PRESENT				Phoca vitulina					iNaturalist:117766								Phoca vitulina richardii							Animalia	Chordata	Mammalia	Carnivora	Phocidae	Phoca	vitulina	richardii	subspecies		Gray, 1864
	imerss.org:iNat:28673317													PRESENT				Megaptera novaeangliae					iNaturalist:41566								Megaptera novaeangliae							Animalia	Chordata	Mammalia	Artiodactyla	Balaenopteridae	Megaptera	novaeangliae		species		(Borowski, 1781)
	imerss.org:iNat:29303229					Tycho Mommsen-Smith								PRESENT				Lontra canadensis					iNaturalist:41777								Lontra canadensis							Animalia	Chordata	Mammalia	Carnivora	Mustelidae	Lontra	canadensis		species		Schreber, 1777
	imerss.org:iNat:31481274					Mews								PRESENT				Phoca vitulina richardii					iNaturalist:117766								Phoca vitulina richardii							Animalia	Chordata	Mammalia	Carnivora	Phocidae	Phoca	vitulina	richardii	subspecies		Gray, 1864
	imerss.org:iNat:35113770					Andrew Simon								PRESENT				Phoca vitulina richardii					iNaturalist:117766								Phoca vitulina richardii							Animalia	Chordata	Mammalia	Carnivora	Phocidae	Phoca	vitulina	richardii	subspecies		Gray, 1864
	imerss.org:iNat:35113777					Andrew Simon								PRESENT				Phoca vitulina richardii					iNaturalist:117766								Phoca vitulina richardii							Animalia	Chordata	Mammalia	Carnivora	Phocidae	Phoca	vitulina	richardii	subspecies		Gray, 1864
	imerss.org:iNat:35113780					Andrew Simon								PRESENT				Zalophus californianus					iNaturalist:41740								Zalophus californianus							Animalia	Chordata	Mammalia	Carnivora	Otariidae	Zalophus	californianus		species		(Lesson, 1828)
	imerss.org:iNat:35359202					Andrew Simon								PRESENT				Megaptera novaeangliae					iNaturalist:41566								Megaptera novaeangliae							Animalia	Chordata	Mammalia	Artiodactyla	Balaenopteridae	Megaptera	novaeangliae		species		(Borowski, 1781)
	imerss.org:iNat:36169878													PRESENT				Eumetopias jubatus					iNaturalist:41755								Eumetopias jubatus							Animalia	Chordata	Mammalia	Carnivora	Otariidae	Eumetopias	jubatus		species		(Schreber, 1776)
	imerss.org:iNat:37085377					Lauren Magner								PRESENT				Phoca vitulina					iNaturalist:117766								Phoca vitulina richardii							Animalia	Chordata	Mammalia	Carnivora	Phocidae	Phoca	vitulina	richardii	subspecies		Gray, 1864
	imerss.org:iNat:37734291													PRESENT				Orcinus orca					iNaturalist:41521								Orcinus orca							Animalia	Chordata	Mammalia	Artiodactyla	Delphinidae	Orcinus	orca		species		(Linnaeus, 1758)
	imerss.org:iNat:38778284					Michael Butler								PRESENT				Phoca vitulina richardii					iNaturalist:117766								Phoca vitulina richardii							Animalia	Chordata	Mammalia	Carnivora	Phocidae	Phoca	vitulina	richardii	subspecies		Gray, 1864
	imerss.org:iNat:41387284													PRESENT				Phoca vitulina richardii					iNaturalist:117766								Phoca vitulina richardii							Animalia	Chordata	Mammalia	Carnivora	Phocidae	Phoca	vitulina	richardii	subspecies		Gray, 1864
	imerss.org:iNat:45033229					Andrew Simon								PRESENT				Phoca vitulina richardii					iNaturalist:117766								Phoca vitulina richardii							Animalia	Chordata	Mammalia	Carnivora	Phocidae	Phoca	vitulina	richardii	subspecies		Gray, 1864
	imerss.org:iNat:48408603					Lauren Magner								PRESENT				Phoca vitulina richardii					iNaturalist:117766								Phoca vitulina richardii							Animalia	Chordata	Mammalia	Carnivora	Phocidae	Phoca	vitulina	richardii	subspecies		Gray, 1864
	imerss.org:iNat:49173154													PRESENT				Lontra canadensis					iNaturalist:41777								Lontra canadensis							Animalia	Chordata	Mammalia	Carnivora	Mustelidae	Lontra	canadensis		species		Schreber, 1777
	imerss.org:iNat:49178976					Gabe Schp								PRESENT				Phoca vitulina richardii					iNaturalist:117766								Phoca vitulina richardii							Animalia	Chordata	Mammalia	Carnivora	Phocidae	Phoca	vitulina	richardii	subspecies		Gray, 1864
	imerss.org:iNat:51552255													PRESENT				Lontra canadensis					iNaturalist:41777								Lontra canadensis							Animalia	Chordata	Mammalia	Carnivora	Mustelidae	Lontra	canadensis		species		Schreber, 1777
	imerss.org:iNat:53604984					David O'Connor								PRESENT				Orcinus orca					iNaturalist:41521								Orcinus orca							Animalia	Chordata	Mammalia	Artiodactyla	Delphinidae	Orcinus	orca		species		(Linnaeus, 1758)
	imerss.org:iNat:55386053					Liam Steele								PRESENT				Lontra canadensis					iNaturalist:41777								Lontra canadensis							Animalia	Chordata	Mammalia	Carnivora	Mustelidae	Lontra	canadensis		species		Schreber, 1777
	imerss.org:iNat:55386880					Liam Steele								PRESENT				Phoca vitulina richardii					iNaturalist:117766								Phoca vitulina richardii							Animalia	Chordata	Mammalia	Carnivora	Phocidae	Phoca	vitulina	richardii	subspecies		Gray, 1864
	imerss.org:iNat:55386881					Liam Steele								PRESENT				Lontra canadensis					iNaturalist:41777								Lontra canadensis							Animalia	Chordata	Mammalia	Carnivora	Mustelidae	Lontra	canadensis		species		Schreber, 1777
	imerss.org:iNat:55389178					Liam Steele								PRESENT				Phoca vitulina richardii					iNaturalist:117766								Phoca vitulina richardii							Animalia	Chordata	Mammalia	Carnivora	Phocidae	Phoca	vitulina	richardii	subspecies		Gray, 1864
	imerss.org:iNat:55389179					Liam Steele								PRESENT				Lontra canadensis					iNaturalist:41777								Lontra canadensis							Animalia	Chordata	Mammalia	Carnivora	Mustelidae	Lontra	canadensis		species		Schreber, 1777
	imerss.org:iNat:55396566					Liam Steele								PRESENT				Phoca vitulina richardii					iNaturalist:117766								Phoca vitulina richardii							Animalia	Chordata	Mammalia	Carnivora	Phocidae	Phoca	vitulina	richardii	subspecies		Gray, 1864
	imerss.org:iNat:55615459													PRESENT				Lontra canadensis					iNaturalist:41777								Lontra canadensis							Animalia	Chordata	Mammalia	Carnivora	Mustelidae	Lontra	canadensis		species		Schreber, 1777
	imerss.org:iNat:57099169					Andrew Simon								PRESENT				Neogale vison					iNaturalist:1264432								Neogale vison							Animalia	Chordata	Mammalia	Carnivora	Mustelidae	Neogale	vison		species		(Schreber, 1777)
	imerss.org:iNat:57789804													PRESENT				Lontra canadensis					iNaturalist:41777								Lontra canadensis							Animalia	Chordata	Mammalia	Carnivora	Mustelidae	Lontra	canadensis		species		Schreber, 1777
	imerss.org:iNat:58969738					Erin Springinotic								PRESENT				Phocoena phocoena					iNaturalist:41440								Phocoena phocoena							Animalia	Chordata	Mammalia	Artiodactyla	Phocoenidae	Phocoena	phocoena		species		(Linnaeus, 1758)
	imerss.org:iNat:59082575					dante m								PRESENT				Phoca vitulina					iNaturalist:117766								Phoca vitulina richardii							Animalia	Chordata	Mammalia	Carnivora	Phocidae	Phoca	vitulina	richardii	subspecies		Gray, 1864
	imerss.org:iNat:59198382					Bill Halliday								PRESENT				Phoca vitulina richardii					iNaturalist:117766								Phoca vitulina richardii							Animalia	Chordata	Mammalia	Carnivora	Phocidae	Phoca	vitulina	richardii	subspecies		Gray, 1864
	imerss.org:iNat:61519484					Jackson W.F. Chu								PRESENT				Phoca vitulina richardii					iNaturalist:117766								Phoca vitulina richardii							Animalia	Chordata	Mammalia	Carnivora	Phocidae	Phoca	vitulina	richardii	subspecies		Gray, 1864
	imerss.org:iNat:61742617					Jackson W.F. Chu								PRESENT				Phoca vitulina richardii					iNaturalist:117766								Phoca vitulina richardii							Animalia	Chordata	Mammalia	Carnivora	Phocidae	Phoca	vitulina	richardii	subspecies		Gray, 1864
	imerss.org:iNat:61754652													PRESENT				Phoca vitulina richardii					iNaturalist:117766								Phoca vitulina richardii							Animalia	Chordata	Mammalia	Carnivora	Phocidae	Phoca	vitulina	richardii	subspecies		Gray, 1864
	imerss.org:iNat:62872062					Sean Daniels								PRESENT				Phoca vitulina richardii					iNaturalist:117766								Phoca vitulina richardii							Animalia	Chordata	Mammalia	Carnivora	Phocidae	Phoca	vitulina	richardii	subspecies		Gray, 1864
	imerss.org:iNat:64809317					Randal								PRESENT				Lontra canadensis					iNaturalist:41777								Lontra canadensis							Animalia	Chordata	Mammalia	Carnivora	Mustelidae	Lontra	canadensis		species		Schreber, 1777
	imerss.org:iNat:65914927					K. B.								PRESENT				Megaptera novaeangliae					iNaturalist:41566								Megaptera novaeangliae							Animalia	Chordata	Mammalia	Artiodactyla	Balaenopteridae	Megaptera	novaeangliae		species		(Borowski, 1781)
	imerss.org:iNat:67834834					Liam Steele								PRESENT				Phoca vitulina richardii					iNaturalist:117766								Phoca vitulina richardii							Animalia	Chordata	Mammalia	Carnivora	Phocidae	Phoca	vitulina	richardii	subspecies		Gray, 1864
	imerss.org:iNat:69308195													PRESENT				Megaptera novaeangliae					iNaturalist:41566								Megaptera novaeangliae							Animalia	Chordata	Mammalia	Artiodactyla	Balaenopteridae	Megaptera	novaeangliae		species		(Borowski, 1781)
	imerss.org:iNat:69770939													PRESENT				Lontra canadensis					iNaturalist:41777								Lontra canadensis							Animalia	Chordata	Mammalia	Carnivora	Mustelidae	Lontra	canadensis		species		Schreber, 1777
	imerss.org:iNat:69844517					Andrew Simon								PRESENT				Zalophus californianus					iNaturalist:41740								Zalophus californianus							Animalia	Chordata	Mammalia	Carnivora	Otariidae	Zalophus	californianus		species		(Lesson, 1828)
	imerss.org:iNat:70864457					Andrew Simon								PRESENT				Phoca vitulina richardii					iNaturalist:117766								Phoca vitulina richardii							Animalia	Chordata	Mammalia	Carnivora	Phocidae	Phoca	vitulina	richardii	subspecies		Gray, 1864
	imerss.org:iNat:71173047					Andrew Simon								PRESENT				Phoca vitulina richardii					iNaturalist:117766								Phoca vitulina richardii							Animalia	Chordata	Mammalia	Carnivora	Phocidae	Phoca	vitulina	richardii	subspecies		Gray, 1864
	imerss.org:iNat:71223901					Dave Zeuss Cochrane								PRESENT				Lontra canadensis					iNaturalist:41777								Lontra canadensis							Animalia	Chordata	Mammalia	Carnivora	Mustelidae	Lontra	canadensis		species		Schreber, 1777
	imerss.org:iNat:73917800					Catiemac								PRESENT				Neogale vison					iNaturalist:1264432								Neogale vison							Animalia	Chordata	Mammalia	Carnivora	Mustelidae	Neogale	vison		species		(Schreber, 1777)
	imerss.org:iNat:78431791					Andrew Simon								PRESENT				Phoca vitulina richardii					iNaturalist:117766								Phoca vitulina richardii							Animalia	Chordata	Mammalia	Carnivora	Phocidae	Phoca	vitulina	richardii	subspecies		Gray, 1864
	imerss.org:iNat:79736578					Audrey Irvine-Broque								PRESENT				Neogale vison					iNaturalist:1264432								Neogale vison							Animalia	Chordata	Mammalia	Carnivora	Mustelidae	Neogale	vison		species		(Schreber, 1777)
	imerss.org:iNat:82260688					Andrew Simon								PRESENT				Phoca vitulina richardii					iNaturalist:117766								Phoca vitulina richardii							Animalia	Chordata	Mammalia	Carnivora	Phocidae	Phoca	vitulina	richardii	subspecies		Gray, 1864
	imerss.org:iNat:83574038					Jackson W.F. Chu								PRESENT				Phoca vitulina richardii					iNaturalist:117766								Phoca vitulina richardii							Animalia	Chordata	Mammalia	Carnivora	Phocidae	Phoca	vitulina	richardii	subspecies		Gray, 1864
	imerss.org:iNat:86685774					Andrew Simon								PRESENT				Megaptera novaeangliae					iNaturalist:41566								Megaptera novaeangliae							Animalia	Chordata	Mammalia	Artiodactyla	Balaenopteridae	Megaptera	novaeangliae		species		(Borowski, 1781)
	imerss.org:iNat:88354471					FreckLes								PRESENT				Phoca vitulina richardii					iNaturalist:117766								Phoca vitulina richardii							Animalia	Chordata	Mammalia	Carnivora	Phocidae	Phoca	vitulina	richardii	subspecies		Gray, 1864
	imerss.org:BCCSN:67	67						12						PRESENT				Orcinus orca					iNaturalist:41521								Orcinus orca							Animalia	Chordata	Mammalia	Artiodactyla	Delphinidae	Orcinus	orca		species		(Linnaeus, 1758)
	imerss.org:BCCSN:471	471												PRESENT				Orcinus orca					iNaturalist:41521								Orcinus orca							Animalia	Chordata	Mammalia	Artiodactyla	Delphinidae	Orcinus	orca		species		(Linnaeus, 1758)
	imerss.org:BCCSN:523	523												PRESENT				Orcinus orca					iNaturalist:41521								Orcinus orca							Animalia	Chordata	Mammalia	Artiodactyla	Delphinidae	Orcinus	orca		species		(Linnaeus, 1758)
	imerss.org:BCCSN:636	636												PRESENT				Orcinus orca					iNaturalist:41521								Orcinus orca							Animalia	Chordata	Mammalia	Artiodactyla	Delphinidae	Orcinus	orca		species		(Linnaeus, 1758)
	imerss.org:BCCSN:1044	1044												PRESENT				Orcinus orca					iNaturalist:41521								Orcinus orca							Animalia	Chordata	Mammalia	Artiodactyla	Delphinidae	Orcinus	orca		species		(Linnaeus, 1758)
	imerss.org:BCCSN:1409	1409						1						PRESENT				Megaptera novaeangliae					iNaturalist:41566								Megaptera novaeangliae							Animalia	Chordata	Mammalia	Artiodactyla	Balaenopteridae	Megaptera	novaeangliae		species		(Borowski, 1781)
	imerss.org:BCCSN:1439	1439						4						PRESENT				Phocoena phocoena					iNaturalist:41440								Phocoena phocoena							Animalia	Chordata	Mammalia	Artiodactyla	Phocoenidae	Phocoena	phocoena		species		(Linnaeus, 1758)
	imerss.org:BCCSN:1573	1573												PRESENT				Orcinus orca					iNaturalist:41521								Orcinus orca							Animalia	Chordata	Mammalia	Artiodactyla	Delphinidae	Orcinus	orca		species		(Linnaeus, 1758)
	imerss.org:BCCSN:1644	1644						20						PRESENT				Orcinus orca					iNaturalist:41521								Orcinus orca							Animalia	Chordata	Mammalia	Artiodactyla	Delphinidae	Orcinus	orca		species		(Linnaeus, 1758)
	imerss.org:BCCSN:1782	1782						27						PRESENT				Phocoenoides dalli					iNaturalist:41446								Phocoenoides dalli							Animalia	Chordata	Mammalia	Artiodactyla	Phocoenidae	Phocoenoides	dalli		species		(True, 1885)
	imerss.org:BCCSN:1845	1845												PRESENT				Orcinus orca					iNaturalist:41521								Orcinus orca							Animalia	Chordata	Mammalia	Artiodactyla	Delphinidae	Orcinus	orca		species		(Linnaeus, 1758)
	imerss.org:BCCSN:1938	1938						6						PRESENT				Orcinus orca					iNaturalist:41521								Orcinus orca							Animalia	Chordata	Mammalia	Artiodactyla	Delphinidae	Orcinus	orca		species		(Linnaeus, 1758)
	imerss.org:BCCSN:2120	2120						8						PRESENT				Orcinus orca					iNaturalist:41521								Orcinus orca							Animalia	Chordata	Mammalia	Artiodactyla	Delphinidae	Orcinus	orca		species		(Linnaeus, 1758)
	imerss.org:BCCSN:2215	2215						6						PRESENT				Orcinus orca					iNaturalist:41521								Orcinus orca							Animalia	Chordata	Mammalia	Artiodactyla	Delphinidae	Orcinus	orca		species		(Linnaeus, 1758)
	imerss.org:BCCSN:2476	2476						10						PRESENT				Orcinus orca					iNaturalist:41521								Orcinus orca							Animalia	Chordata	Mammalia	Artiodactyla	Delphinidae	Orcinus	orca		species		(Linnaeus, 1758)
	imerss.org:BCCSN:2697	2697						1						PRESENT				Phocoena phocoena					iNaturalist:41440								Phocoena phocoena							Animalia	Chordata	Mammalia	Artiodactyla	Phocoenidae	Phocoena	phocoena		species		(Linnaeus, 1758)
	imerss.org:BCCSN:3006	3006						6						PRESENT				Orcinus orca					iNaturalist:41521								Orcinus orca							Animalia	Chordata	Mammalia	Artiodactyla	Delphinidae	Orcinus	orca		species		(Linnaeus, 1758)
	imerss.org:BCCSN:3808	3808												PRESENT				Orcinus orca					iNaturalist:41521								Orcinus orca							Animalia	Chordata	Mammalia	Artiodactyla	Delphinidae	Orcinus	orca		species		(Linnaeus, 1758)
	imerss.org:BCCSN:4283	4283						12						PRESENT				Orcinus orca					iNaturalist:41521								Orcinus orca							Animalia	Chordata	Mammalia	Artiodactyla	Delphinidae	Orcinus	orca		species		(Linnaeus, 1758)
	imerss.org:BCCSN:4512	4512						5						PRESENT				Orcinus orca					iNaturalist:41521								Orcinus orca							Animalia	Chordata	Mammalia	Artiodactyla	Delphinidae	Orcinus	orca		species		(Linnaeus, 1758)
	imerss.org:BCCSN:4935	4935												PRESENT				Orcinus orca					iNaturalist:41521								Orcinus orca							Animalia	Chordata	Mammalia	Artiodactyla	Delphinidae	Orcinus	orca		species		(Linnaeus, 1758)
	imerss.org:BCCSN:5114	5114						7						PRESENT				Orcinus orca					iNaturalist:41521								Orcinus orca							Animalia	Chordata	Mammalia	Artiodactyla	Delphinidae	Orcinus	orca		species		(Linnaeus, 1758)
	imerss.org:BCCSN:5422	5422						10						PRESENT				Orcinus orca					iNaturalist:41521								Orcinus orca							Animalia	Chordata	Mammalia	Artiodactyla	Delphinidae	Orcinus	orca		species		(Linnaeus, 1758)
	imerss.org:BCCSN:6695	6695						6						PRESENT				Orcinus orca					iNaturalist:41521								Orcinus orca							Animalia	Chordata	Mammalia	Artiodactyla	Delphinidae	Orcinus	orca		species		(Linnaeus, 1758)
	imerss.org:BCCSN:6928	6928						12						PRESENT				Orcinus orca					iNaturalist:41521								Orcinus orca							Animalia	Chordata	Mammalia	Artiodactyla	Delphinidae	Orcinus	orca		species		(Linnaeus, 1758)
	imerss.org:BCCSN:8133	8133												PRESENT				Orcinus orca					iNaturalist:41521								Orcinus orca							Animalia	Chordata	Mammalia	Artiodactyla	Delphinidae	Orcinus	orca		species		(Linnaeus, 1758)
	imerss.org:BCCSN:8325	8325												PRESENT				Orcinus orca					iNaturalist:41521								Orcinus orca							Animalia	Chordata	Mammalia	Artiodactyla	Delphinidae	Orcinus	orca		species		(Linnaeus, 1758)
	imerss.org:BCCSN:8459	8459						10						PRESENT				Orcinus orca					iNaturalist:41521								Orcinus orca							Animalia	Chordata	Mammalia	Artiodactyla	Delphinidae	Orcinus	orca		species		(Linnaeus, 1758)
	imerss.org:BCCSN:8698	8698												PRESENT				Orcinus orca					iNaturalist:41521								Orcinus orca							Animalia	Chordata	Mammalia	Artiodactyla	Delphinidae	Orcinus	orca		species		(Linnaeus, 1758)
	imerss.org:BCCSN:8765	8765						2						PRESENT				Megaptera novaeangliae					iNaturalist:41566								Megaptera novaeangliae							Animalia	Chordata	Mammalia	Artiodactyla	Balaenopteridae	Megaptera	novaeangliae		species		(Borowski, 1781)
	imerss.org:BCCSN:9428	9428						7						PRESENT				Orcinus orca					iNaturalist:41521								Orcinus orca							Animalia	Chordata	Mammalia	Artiodactyla	Delphinidae	Orcinus	orca		species		(Linnaeus, 1758)
	imerss.org:BCCSN:9592	9592						2						PRESENT				Orcinus orca					iNaturalist:41521								Orcinus orca							Animalia	Chordata	Mammalia	Artiodactyla	Delphinidae	Orcinus	orca		species		(Linnaeus, 1758)
	imerss.org:BCCSN:9599	9599												PRESENT				Orcinus orca					iNaturalist:41521								Orcinus orca							Animalia	Chordata	Mammalia	Artiodactyla	Delphinidae	Orcinus	orca		species		(Linnaeus, 1758)
	imerss.org:BCCSN:10044	10044												PRESENT				Orcinus orca					iNaturalist:41521								Orcinus orca							Animalia	Chordata	Mammalia	Artiodactyla	Delphinidae	Orcinus	orca		species		(Linnaeus, 1758)
	imerss.org:BCCSN:10313	10313						30						PRESENT				Orcinus orca					iNaturalist:41521								Orcinus orca							Animalia	Chordata	Mammalia	Artiodactyla	Delphinidae	Orcinus	orca		species		(Linnaeus, 1758)
	imerss.org:BCCSN:10427	10427						15						PRESENT				Orcinus orca					iNaturalist:41521								Orcinus orca							Animalia	Chordata	Mammalia	Artiodactyla	Delphinidae	Orcinus	orca		species		(Linnaeus, 1758)
	imerss.org:BCCSN:10490	10490												PRESENT				Orcinus orca					iNaturalist:41521								Orcinus orca							Animalia	Chordata	Mammalia	Artiodactyla	Delphinidae	Orcinus	orca		species		(Linnaeus, 1758)
	imerss.org:BCCSN:11030	11030						40						PRESENT				Orcinus orca					iNaturalist:41521								Orcinus orca							Animalia	Chordata	Mammalia	Artiodactyla	Delphinidae	Orcinus	orca		species		(Linnaeus, 1758)
	imerss.org:BCCSN:11482	11482												PRESENT				Orcinus orca					iNaturalist:41521								Orcinus orca							Animalia	Chordata	Mammalia	Artiodactyla	Delphinidae	Orcinus	orca		species		(Linnaeus, 1758)
	imerss.org:BCCSN:11709	11709						20						PRESENT				Orcinus orca					iNaturalist:41521								Orcinus orca							Animalia	Chordata	Mammalia	Artiodactyla	Delphinidae	Orcinus	orca		species		(Linnaeus, 1758)
	imerss.org:BCCSN:11851	11851						1						PRESENT				Orcinus orca					iNaturalist:41521								Orcinus orca							Animalia	Chordata	Mammalia	Artiodactyla	Delphinidae	Orcinus	orca		species		(Linnaeus, 1758)
	imerss.org:BCCSN:11895	11895						5						PRESENT				Orcinus orca					iNaturalist:41521								Orcinus orca							Animalia	Chordata	Mammalia	Artiodactyla	Delphinidae	Orcinus	orca		species		(Linnaeus, 1758)
	imerss.org:BCCSN:12134	12134						2						PRESENT				Megaptera novaeangliae					iNaturalist:41566								Megaptera novaeangliae							Animalia	Chordata	Mammalia	Artiodactyla	Balaenopteridae	Megaptera	novaeangliae		species		(Borowski, 1781)
	imerss.org:BCCSN:13012	13012						3						PRESENT				Orcinus orca					iNaturalist:41521								Orcinus orca							Animalia	Chordata	Mammalia	Artiodactyla	Delphinidae	Orcinus	orca		species		(Linnaeus, 1758)
	imerss.org:BCCSN:13695	13695						3						PRESENT				Orcinus orca					iNaturalist:41521								Orcinus orca							Animalia	Chordata	Mammalia	Artiodactyla	Delphinidae	Orcinus	orca		species		(Linnaeus, 1758)
	imerss.org:BCCSN:13793	13793												PRESENT				Orcinus orca					iNaturalist:41521								Orcinus orca							Animalia	Chordata	Mammalia	Artiodactyla	Delphinidae	Orcinus	orca		species		(Linnaeus, 1758)
	imerss.org:BCCSN:14113	14113												PRESENT				Orcinus orca					iNaturalist:41521								Orcinus orca							Animalia	Chordata	Mammalia	Artiodactyla	Delphinidae	Orcinus	orca		species		(Linnaeus, 1758)
	imerss.org:BCCSN:14239	14239						12						PRESENT				Orcinus orca					iNaturalist:41521								Orcinus orca							Animalia	Chordata	Mammalia	Artiodactyla	Delphinidae	Orcinus	orca		species		(Linnaeus, 1758)
	imerss.org:BCCSN:14510	14510						20						PRESENT				Orcinus orca					iNaturalist:41521								Orcinus orca							Animalia	Chordata	Mammalia	Artiodactyla	Delphinidae	Orcinus	orca		species		(Linnaeus, 1758)
	imerss.org:BCCSN:15719	15719												PRESENT				Orcinus orca					iNaturalist:41521								Orcinus orca							Animalia	Chordata	Mammalia	Artiodactyla	Delphinidae	Orcinus	orca		species		(Linnaeus, 1758)
	imerss.org:BCCSN:15812	15812												PRESENT				Orcinus orca					iNaturalist:41521								Orcinus orca							Animalia	Chordata	Mammalia	Artiodactyla	Delphinidae	Orcinus	orca		species		(Linnaeus, 1758)
	imerss.org:BCCSN:15847	15847												PRESENT				Orcinus orca					iNaturalist:41521								Orcinus orca							Animalia	Chordata	Mammalia	Artiodactyla	Delphinidae	Orcinus	orca		species		(Linnaeus, 1758)
	imerss.org:BCCSN:16223	16223						12						PRESENT				Orcinus orca					iNaturalist:41521								Orcinus orca							Animalia	Chordata	Mammalia	Artiodactyla	Delphinidae	Orcinus	orca		species		(Linnaeus, 1758)
	imerss.org:BCCSN:17055	17055						50						PRESENT				Orcinus orca					iNaturalist:41521								Orcinus orca							Animalia	Chordata	Mammalia	Artiodactyla	Delphinidae	Orcinus	orca		species		(Linnaeus, 1758)
	imerss.org:BCCSN:17450	17450												PRESENT				Orcinus orca					iNaturalist:41521								Orcinus orca							Animalia	Chordata	Mammalia	Artiodactyla	Delphinidae	Orcinus	orca		species		(Linnaeus, 1758)
	imerss.org:BCCSN:17583	17583												PRESENT				Orcinus orca					iNaturalist:41521								Orcinus orca							Animalia	Chordata	Mammalia	Artiodactyla	Delphinidae	Orcinus	orca		species		(Linnaeus, 1758)
	imerss.org:BCCSN:17949	17949												PRESENT				Orcinus orca					iNaturalist:41521								Orcinus orca							Animalia	Chordata	Mammalia	Artiodactyla	Delphinidae	Orcinus	orca		species		(Linnaeus, 1758)
	imerss.org:BCCSN:18944	18944												PRESENT				Orcinus orca					iNaturalist:41521								Orcinus orca							Animalia	Chordata	Mammalia	Artiodactyla	Delphinidae	Orcinus	orca		species		(Linnaeus, 1758)
	imerss.org:BCCSN:19199	19199						3						PRESENT				Orcinus orca					iNaturalist:41521								Orcinus orca							Animalia	Chordata	Mammalia	Artiodactyla	Delphinidae	Orcinus	orca		species		(Linnaeus, 1758)
	imerss.org:BCCSN:20035	20035						3						PRESENT				Eschrichtius robustus					iNaturalist:41478								Eschrichtius robustus							Animalia	Chordata	Mammalia	Artiodactyla	Eschrichtiidae	Eschrichtius	robustus		species		(Lilljeborg, 1861)
	imerss.org:BCCSN:22587	22587												PRESENT				Orcinus orca					iNaturalist:41521								Orcinus orca							Animalia	Chordata	Mammalia	Artiodactyla	Delphinidae	Orcinus	orca		species		(Linnaeus, 1758)
	imerss.org:BCCSN:22851	22851												PRESENT				Orcinus orca					iNaturalist:41521								Orcinus orca							Animalia	Chordata	Mammalia	Artiodactyla	Delphinidae	Orcinus	orca		species		(Linnaeus, 1758)
	imerss.org:BCCSN:23568	23568						11						PRESENT				Orcinus orca					iNaturalist:41521								Orcinus orca							Animalia	Chordata	Mammalia	Artiodactyla	Delphinidae	Orcinus	orca		species		(Linnaeus, 1758)
	imerss.org:BCCSN:24068	24068												PRESENT				Orcinus orca					iNaturalist:41521								Orcinus orca							Animalia	Chordata	Mammalia	Artiodactyla	Delphinidae	Orcinus	orca		species		(Linnaeus, 1758)
	imerss.org:BCCSN:24237	24237						8						PRESENT				Orcinus orca					iNaturalist:41521								Orcinus orca							Animalia	Chordata	Mammalia	Artiodactyla	Delphinidae	Orcinus	orca		species		(Linnaeus, 1758)
	imerss.org:BCCSN:25225	25225						10						PRESENT				Orcinus orca					iNaturalist:41521								Orcinus orca							Animalia	Chordata	Mammalia	Artiodactyla	Delphinidae	Orcinus	orca		species		(Linnaeus, 1758)
	imerss.org:BCCSN:25295	25295												PRESENT				Orcinus orca					iNaturalist:41521								Orcinus orca							Animalia	Chordata	Mammalia	Artiodactyla	Delphinidae	Orcinus	orca		species		(Linnaeus, 1758)
	imerss.org:BCCSN:25859	25859						8						PRESENT				Orcinus orca					iNaturalist:41521								Orcinus orca							Animalia	Chordata	Mammalia	Artiodactyla	Delphinidae	Orcinus	orca		species		(Linnaeus, 1758)
	imerss.org:BCCSN:26315	26315												PRESENT				Orcinus orca					iNaturalist:41521								Orcinus orca							Animalia	Chordata	Mammalia	Artiodactyla	Delphinidae	Orcinus	orca		species		(Linnaeus, 1758)
	imerss.org:BCCSN:26336	26336												PRESENT				Orcinus orca					iNaturalist:41521								Orcinus orca							Animalia	Chordata	Mammalia	Artiodactyla	Delphinidae	Orcinus	orca		species		(Linnaeus, 1758)
	imerss.org:BCCSN:26435	26435						6						PRESENT				Orcinus orca					iNaturalist:41521								Orcinus orca							Animalia	Chordata	Mammalia	Artiodactyla	Delphinidae	Orcinus	orca		species		(Linnaeus, 1758)
	imerss.org:BCCSN:26635	26635												PRESENT				Orcinus orca					iNaturalist:41521								Orcinus orca							Animalia	Chordata	Mammalia	Artiodactyla	Delphinidae	Orcinus	orca		species		(Linnaeus, 1758)
	imerss.org:BCCSN:26807	26807						6						PRESENT				Orcinus orca					iNaturalist:41521								Orcinus orca							Animalia	Chordata	Mammalia	Artiodactyla	Delphinidae	Orcinus	orca		species		(Linnaeus, 1758)
	imerss.org:BCCSN:26891	26891												PRESENT				Orcinus orca					iNaturalist:41521								Orcinus orca							Animalia	Chordata	Mammalia	Artiodactyla	Delphinidae	Orcinus	orca		species		(Linnaeus, 1758)
	imerss.org:BCCSN:27197	27197						12						PRESENT				Orcinus orca					iNaturalist:41521								Orcinus orca							Animalia	Chordata	Mammalia	Artiodactyla	Delphinidae	Orcinus	orca		species		(Linnaeus, 1758)
	imerss.org:BCCSN:27210	27210												PRESENT				Orcinus orca					iNaturalist:41521								Orcinus orca							Animalia	Chordata	Mammalia	Artiodactyla	Delphinidae	Orcinus	orca		species		(Linnaeus, 1758)
	imerss.org:BCCSN:27402	27402						20						PRESENT				Orcinus orca					iNaturalist:41521								Orcinus orca							Animalia	Chordata	Mammalia	Artiodactyla	Delphinidae	Orcinus	orca		species		(Linnaeus, 1758)
	imerss.org:BCCSN:27422	27422						30						PRESENT				Orcinus orca					iNaturalist:41521								Orcinus orca							Animalia	Chordata	Mammalia	Artiodactyla	Delphinidae	Orcinus	orca		species		(Linnaeus, 1758)
	imerss.org:BCCSN:27560	27560						10						PRESENT				Orcinus orca					iNaturalist:41521								Orcinus orca							Animalia	Chordata	Mammalia	Artiodactyla	Delphinidae	Orcinus	orca		species		(Linnaeus, 1758)
	imerss.org:BCCSN:28363	28363						12						PRESENT				Orcinus orca					iNaturalist:41521								Orcinus orca							Animalia	Chordata	Mammalia	Artiodactyla	Delphinidae	Orcinus	orca		species		(Linnaeus, 1758)
	imerss.org:BCCSN:28530	28530						10						PRESENT				Orcinus orca					iNaturalist:41521								Orcinus orca							Animalia	Chordata	Mammalia	Artiodactyla	Delphinidae	Orcinus	orca		species		(Linnaeus, 1758)
	imerss.org:BCCSN:28897	28897												PRESENT				Orcinus orca					iNaturalist:41521								Orcinus orca							Animalia	Chordata	Mammalia	Artiodactyla	Delphinidae	Orcinus	orca		species		(Linnaeus, 1758)
	imerss.org:BCCSN:29088	29088												PRESENT				Orcinus orca					iNaturalist:41521								Orcinus orca							Animalia	Chordata	Mammalia	Artiodactyla	Delphinidae	Orcinus	orca		species		(Linnaeus, 1758)
	imerss.org:BCCSN:29107	29107												PRESENT				Orcinus orca					iNaturalist:41521								Orcinus orca							Animalia	Chordata	Mammalia	Artiodactyla	Delphinidae	Orcinus	orca		species		(Linnaeus, 1758)
	imerss.org:BCCSN:29362	29362						3						PRESENT				Orcinus orca					iNaturalist:41521								Orcinus orca							Animalia	Chordata	Mammalia	Artiodactyla	Delphinidae	Orcinus	orca		species		(Linnaeus, 1758)
	imerss.org:BCCSN:29726	29726												PRESENT				Orcinus orca					iNaturalist:41521								Orcinus orca							Animalia	Chordata	Mammalia	Artiodactyla	Delphinidae	Orcinus	orca		species		(Linnaeus, 1758)
	imerss.org:BCCSN:30046	30046						7						PRESENT				Orcinus orca					iNaturalist:41521								Orcinus orca							Animalia	Chordata	Mammalia	Artiodactyla	Delphinidae	Orcinus	orca		species		(Linnaeus, 1758)
	imerss.org:BCCSN:30656	30656						7						PRESENT				Orcinus orca					iNaturalist:41521								Orcinus orca							Animalia	Chordata	Mammalia	Artiodactyla	Delphinidae	Orcinus	orca		species		(Linnaeus, 1758)
	imerss.org:BCCSN:30863	30863												PRESENT				Orcinus orca					iNaturalist:41521								Orcinus orca							Animalia	Chordata	Mammalia	Artiodactyla	Delphinidae	Orcinus	orca		species		(Linnaeus, 1758)
	imerss.org:BCCSN:31161	31161						1						PRESENT				Balaenoptera acutorostrata					iNaturalist:41550								Balaenoptera acutorostrata							Animalia	Chordata	Mammalia	Artiodactyla	Balaenopteridae	Balaenoptera	acutorostrata		species		Lacépède, 1804
	imerss.org:BCCSN:31289	31289						1						PRESENT				Orcinus orca					iNaturalist:41521								Orcinus orca							Animalia	Chordata	Mammalia	Artiodactyla	Delphinidae	Orcinus	orca		species		(Linnaeus, 1758)
	imerss.org:BCCSN:31470	31470						20						PRESENT				Orcinus orca					iNaturalist:41521								Orcinus orca							Animalia	Chordata	Mammalia	Artiodactyla	Delphinidae	Orcinus	orca		species		(Linnaeus, 1758)
	imerss.org:BCCSN:31563	31563												PRESENT				Orcinus orca					iNaturalist:41521								Orcinus orca							Animalia	Chordata	Mammalia	Artiodactyla	Delphinidae	Orcinus	orca		species		(Linnaeus, 1758)
	imerss.org:BCCSN:31591	31591						11						PRESENT				Orcinus orca					iNaturalist:41521								Orcinus orca							Animalia	Chordata	Mammalia	Artiodactyla	Delphinidae	Orcinus	orca		species		(Linnaeus, 1758)
	imerss.org:BCCSN:31606	31606												PRESENT				Orcinus orca					iNaturalist:41521								Orcinus orca							Animalia	Chordata	Mammalia	Artiodactyla	Delphinidae	Orcinus	orca		species		(Linnaeus, 1758)
	imerss.org:BCCSN:31667	31667						5						PRESENT				Orcinus orca					iNaturalist:41521								Orcinus orca							Animalia	Chordata	Mammalia	Artiodactyla	Delphinidae	Orcinus	orca		species		(Linnaeus, 1758)
	imerss.org:BCCSN:32478	32478						10						PRESENT				Orcinus orca					iNaturalist:41521								Orcinus orca							Animalia	Chordata	Mammalia	Artiodactyla	Delphinidae	Orcinus	orca		species		(Linnaeus, 1758)
	imerss.org:BCCSN:32496	32496												PRESENT				Orcinus orca					iNaturalist:41521								Orcinus orca							Animalia	Chordata	Mammalia	Artiodactyla	Delphinidae	Orcinus	orca		species		(Linnaeus, 1758)
	imerss.org:BCCSN:32556	32556						20						PRESENT				Orcinus orca					iNaturalist:41521								Orcinus orca							Animalia	Chordata	Mammalia	Artiodactyla	Delphinidae	Orcinus	orca		species		(Linnaeus, 1758)
	imerss.org:BCCSN:32580	32580						10						PRESENT				Orcinus orca					iNaturalist:41521								Orcinus orca							Animalia	Chordata	Mammalia	Artiodactyla	Delphinidae	Orcinus	orca		species		(Linnaeus, 1758)
	imerss.org:BCCSN:32909	32909						4						PRESENT				Orcinus orca					iNaturalist:41521								Orcinus orca							Animalia	Chordata	Mammalia	Artiodactyla	Delphinidae	Orcinus	orca		species		(Linnaeus, 1758)
	imerss.org:BCCSN:33113	33113												PRESENT				Orcinus orca					iNaturalist:41521								Orcinus orca							Animalia	Chordata	Mammalia	Artiodactyla	Delphinidae	Orcinus	orca		species		(Linnaeus, 1758)
	imerss.org:BCCSN:33134	33134						7						PRESENT				Orcinus orca					iNaturalist:41521								Orcinus orca							Animalia	Chordata	Mammalia	Artiodactyla	Delphinidae	Orcinus	orca		species		(Linnaeus, 1758)
	imerss.org:BCCSN:33167	33167						2						PRESENT				Orcinus orca					iNaturalist:41521								Orcinus orca							Animalia	Chordata	Mammalia	Artiodactyla	Delphinidae	Orcinus	orca		species		(Linnaeus, 1758)
	imerss.org:BCCSN:33244	33244												PRESENT				Orcinus orca					iNaturalist:41521								Orcinus orca							Animalia	Chordata	Mammalia	Artiodactyla	Delphinidae	Orcinus	orca		species		(Linnaeus, 1758)
	imerss.org:BCCSN:33419	33419						3						PRESENT				Phocoena phocoena					iNaturalist:41440								Phocoena phocoena							Animalia	Chordata	Mammalia	Artiodactyla	Phocoenidae	Phocoena	phocoena		species		(Linnaeus, 1758)
	imerss.org:BCCSN:33748	33748												PRESENT				Orcinus orca					iNaturalist:41521								Orcinus orca							Animalia	Chordata	Mammalia	Artiodactyla	Delphinidae	Orcinus	orca		species		(Linnaeus, 1758)
	imerss.org:BCCSN:33864	33864						1						PRESENT				Orcinus orca					iNaturalist:41521								Orcinus orca							Animalia	Chordata	Mammalia	Artiodactyla	Delphinidae	Orcinus	orca		species		(Linnaeus, 1758)
	imerss.org:BCCSN:34171	34171						2						PRESENT				Phocoena phocoena					iNaturalist:41440								Phocoena phocoena							Animalia	Chordata	Mammalia	Artiodactyla	Phocoenidae	Phocoena	phocoena		species		(Linnaeus, 1758)
	imerss.org:BCCSN:34436	34436						20						PRESENT				Orcinus orca					iNaturalist:41521								Orcinus orca							Animalia	Chordata	Mammalia	Artiodactyla	Delphinidae	Orcinus	orca		species		(Linnaeus, 1758)
	imerss.org:BCCSN:34707	34707						15						PRESENT				Orcinus orca					iNaturalist:41521								Orcinus orca							Animalia	Chordata	Mammalia	Artiodactyla	Delphinidae	Orcinus	orca		species		(Linnaeus, 1758)
	imerss.org:BCCSN:35193	35193						20						PRESENT				Phocoenoides dalli					iNaturalist:41446								Phocoenoides dalli							Animalia	Chordata	Mammalia	Artiodactyla	Phocoenidae	Phocoenoides	dalli		species		(True, 1885)
	imerss.org:BCCSN:35910	35910						20						PRESENT				Orcinus orca					iNaturalist:41521								Orcinus orca							Animalia	Chordata	Mammalia	Artiodactyla	Delphinidae	Orcinus	orca		species		(Linnaeus, 1758)
	imerss.org:BCCSN:36001	36001												PRESENT				Orcinus orca					iNaturalist:41521								Orcinus orca							Animalia	Chordata	Mammalia	Artiodactyla	Delphinidae	Orcinus	orca		species		(Linnaeus, 1758)
	imerss.org:BCCSN:36673	36673												PRESENT				Orcinus orca					iNaturalist:41521								Orcinus orca							Animalia	Chordata	Mammalia	Artiodactyla	Delphinidae	Orcinus	orca		species		(Linnaeus, 1758)
	imerss.org:BCCSN:36803	36803						3						PRESENT				Orcinus orca					iNaturalist:41521								Orcinus orca							Animalia	Chordata	Mammalia	Artiodactyla	Delphinidae	Orcinus	orca		species		(Linnaeus, 1758)
	imerss.org:BCCSN:36850	36850												PRESENT				Orcinus orca					iNaturalist:41521								Orcinus orca							Animalia	Chordata	Mammalia	Artiodactyla	Delphinidae	Orcinus	orca		species		(Linnaeus, 1758)
	imerss.org:BCCSN:36974	36974												PRESENT				Orcinus orca					iNaturalist:41521								Orcinus orca							Animalia	Chordata	Mammalia	Artiodactyla	Delphinidae	Orcinus	orca		species		(Linnaeus, 1758)
	imerss.org:BCCSN:37058	37058												PRESENT				Orcinus orca					iNaturalist:41521								Orcinus orca							Animalia	Chordata	Mammalia	Artiodactyla	Delphinidae	Orcinus	orca		species		(Linnaeus, 1758)
	imerss.org:BCCSN:37563	37563												PRESENT				Orcinus orca					iNaturalist:41521								Orcinus orca							Animalia	Chordata	Mammalia	Artiodactyla	Delphinidae	Orcinus	orca		species		(Linnaeus, 1758)
	imerss.org:BCCSN:37636	37636						12						PRESENT				Orcinus orca					iNaturalist:41521								Orcinus orca							Animalia	Chordata	Mammalia	Artiodactyla	Delphinidae	Orcinus	orca		species		(Linnaeus, 1758)
	imerss.org:BCCSN:37840	37840												PRESENT				Orcinus orca					iNaturalist:41521								Orcinus orca							Animalia	Chordata	Mammalia	Artiodactyla	Delphinidae	Orcinus	orca		species		(Linnaeus, 1758)
	imerss.org:BCCSN:38056	38056						12						PRESENT				Orcinus orca					iNaturalist:41521								Orcinus orca							Animalia	Chordata	Mammalia	Artiodactyla	Delphinidae	Orcinus	orca		species		(Linnaeus, 1758)
	imerss.org:BCCSN:38251	38251						11						PRESENT				Orcinus orca					iNaturalist:41521								Orcinus orca							Animalia	Chordata	Mammalia	Artiodactyla	Delphinidae	Orcinus	orca		species		(Linnaeus, 1758)
	imerss.org:BCCSN:40116	40116						1						PRESENT				Orcinus orca					iNaturalist:41521								Orcinus orca							Animalia	Chordata	Mammalia	Artiodactyla	Delphinidae	Orcinus	orca		species		(Linnaeus, 1758)
	imerss.org:BCCSN:40140	40140												PRESENT				Orcinus orca					iNaturalist:41521								Orcinus orca							Animalia	Chordata	Mammalia	Artiodactyla	Delphinidae	Orcinus	orca		species		(Linnaeus, 1758)
	imerss.org:BCCSN:40276	40276												PRESENT				Orcinus orca					iNaturalist:41521								Orcinus orca							Animalia	Chordata	Mammalia	Artiodactyla	Delphinidae	Orcinus	orca		species		(Linnaeus, 1758)
	imerss.org:BCCSN:40339	40339												PRESENT				Orcinus orca					iNaturalist:41521								Orcinus orca							Animalia	Chordata	Mammalia	Artiodactyla	Delphinidae	Orcinus	orca		species		(Linnaeus, 1758)
	imerss.org:BCCSN:40603	40603						6						PRESENT				Orcinus orca					iNaturalist:41521								Orcinus orca							Animalia	Chordata	Mammalia	Artiodactyla	Delphinidae	Orcinus	orca		species		(Linnaeus, 1758)
	imerss.org:BCCSN:41276	41276												PRESENT				Orcinus orca					iNaturalist:41521								Orcinus orca							Animalia	Chordata	Mammalia	Artiodactyla	Delphinidae	Orcinus	orca		species		(Linnaeus, 1758)
	imerss.org:BCCSN:41524	41524						5						PRESENT				Orcinus orca					iNaturalist:41521								Orcinus orca							Animalia	Chordata	Mammalia	Artiodactyla	Delphinidae	Orcinus	orca		species		(Linnaeus, 1758)
	imerss.org:BCCSN:41824	41824						4						PRESENT				Orcinus orca					iNaturalist:41521								Orcinus orca							Animalia	Chordata	Mammalia	Artiodactyla	Delphinidae	Orcinus	orca		species		(Linnaeus, 1758)
	imerss.org:BCCSN:41846	41846						10						PRESENT				Phocoena phocoena					iNaturalist:41440								Phocoena phocoena							Animalia	Chordata	Mammalia	Artiodactyla	Phocoenidae	Phocoena	phocoena		species		(Linnaeus, 1758)
	imerss.org:BCCSN:41876	41876												PRESENT				Orcinus orca					iNaturalist:41521								Orcinus orca							Animalia	Chordata	Mammalia	Artiodactyla	Delphinidae	Orcinus	orca		species		(Linnaeus, 1758)
	imerss.org:BCCSN:43909	43909						3						PRESENT				Phocoena phocoena					iNaturalist:41440								Phocoena phocoena							Animalia	Chordata	Mammalia	Artiodactyla	Phocoenidae	Phocoena	phocoena		species		(Linnaeus, 1758)
	imerss.org:BCCSN:43915	43915						4						PRESENT				Orcinus orca					iNaturalist:41521								Orcinus orca							Animalia	Chordata	Mammalia	Artiodactyla	Delphinidae	Orcinus	orca		species		(Linnaeus, 1758)
	imerss.org:BCCSN:48231	48231						8						PRESENT				Orcinus orca					iNaturalist:41521								Orcinus orca							Animalia	Chordata	Mammalia	Artiodactyla	Delphinidae	Orcinus	orca		species		(Linnaeus, 1758)
	imerss.org:BCCSN:48310	48310						12						PRESENT				Orcinus orca					iNaturalist:41521								Orcinus orca							Animalia	Chordata	Mammalia	Artiodactyla	Delphinidae	Orcinus	orca		species		(Linnaeus, 1758)
	imerss.org:BCCSN:48339	48339						5						PRESENT				Phocoenoides dalli					iNaturalist:41446								Phocoenoides dalli							Animalia	Chordata	Mammalia	Artiodactyla	Phocoenidae	Phocoenoides	dalli		species		(True, 1885)
	imerss.org:BCCSN:48761	48761						7						PRESENT				Orcinus orca					iNaturalist:41521								Orcinus orca							Animalia	Chordata	Mammalia	Artiodactyla	Delphinidae	Orcinus	orca		species		(Linnaeus, 1758)
	imerss.org:BCCSN:49121	49121						4						PRESENT				Orcinus orca					iNaturalist:41521								Orcinus orca							Animalia	Chordata	Mammalia	Artiodactyla	Delphinidae	Orcinus	orca		species		(Linnaeus, 1758)
	imerss.org:BCCSN:51515	51515						10						PRESENT				Orcinus orca					iNaturalist:41521								Orcinus orca							Animalia	Chordata	Mammalia	Artiodactyla	Delphinidae	Orcinus	orca		species		(Linnaeus, 1758)
	imerss.org:BCCSN:51929	51929												PRESENT				Orcinus orca					iNaturalist:41521								Orcinus orca							Animalia	Chordata	Mammalia	Artiodactyla	Delphinidae	Orcinus	orca		species		(Linnaeus, 1758)
	imerss.org:BCCSN:53235	53235						6						PRESENT				Orcinus orca					iNaturalist:41521								Orcinus orca							Animalia	Chordata	Mammalia	Artiodactyla	Delphinidae	Orcinus	orca		species		(Linnaeus, 1758)
	imerss.org:BCCSN:53237	53237						20						PRESENT				Orcinus orca					iNaturalist:41521								Orcinus orca							Animalia	Chordata	Mammalia	Artiodactyla	Delphinidae	Orcinus	orca		species		(Linnaeus, 1758)
	imerss.org:BCCSN:53247	53247						10						PRESENT				Orcinus orca					iNaturalist:41521								Orcinus orca							Animalia	Chordata	Mammalia	Artiodactyla	Delphinidae	Orcinus	orca		species		(Linnaeus, 1758)
	imerss.org:BCCSN:53698	53698						2						PRESENT				Phocoena phocoena					iNaturalist:41440								Phocoena phocoena							Animalia	Chordata	Mammalia	Artiodactyla	Phocoenidae	Phocoena	phocoena		species		(Linnaeus, 1758)
	imerss.org:BCCSN:53840	53840						5						PRESENT				Orcinus orca					iNaturalist:41521								Orcinus orca							Animalia	Chordata	Mammalia	Artiodactyla	Delphinidae	Orcinus	orca		species		(Linnaeus, 1758)
	imerss.org:BCCSN:53899	53899						8						PRESENT				Orcinus orca					iNaturalist:41521								Orcinus orca							Animalia	Chordata	Mammalia	Artiodactyla	Delphinidae	Orcinus	orca		species		(Linnaeus, 1758)
	imerss.org:BCCSN:53916	53916						2						PRESENT				Phocoena phocoena					iNaturalist:41440								Phocoena phocoena							Animalia	Chordata	Mammalia	Artiodactyla	Phocoenidae	Phocoena	phocoena		species		(Linnaeus, 1758)
	imerss.org:BCCSN:54495	54495						20						PRESENT				Orcinus orca					iNaturalist:41521								Orcinus orca							Animalia	Chordata	Mammalia	Artiodactyla	Delphinidae	Orcinus	orca		species		(Linnaeus, 1758)
	imerss.org:BCCSN:54496	54496												PRESENT				Orcinus orca					iNaturalist:41521								Orcinus orca							Animalia	Chordata	Mammalia	Artiodactyla	Delphinidae	Orcinus	orca		species		(Linnaeus, 1758)
	imerss.org:BCCSN:54522	54522						10						PRESENT				Orcinus orca					iNaturalist:41521								Orcinus orca							Animalia	Chordata	Mammalia	Artiodactyla	Delphinidae	Orcinus	orca		species		(Linnaeus, 1758)
	imerss.org:BCCSN:54616	54616						20						PRESENT				Orcinus orca					iNaturalist:41521								Orcinus orca							Animalia	Chordata	Mammalia	Artiodactyla	Delphinidae	Orcinus	orca		species		(Linnaeus, 1758)
	imerss.org:BCCSN:54681	54681						10						PRESENT				Orcinus orca					iNaturalist:41521								Orcinus orca							Animalia	Chordata	Mammalia	Artiodactyla	Delphinidae	Orcinus	orca		species		(Linnaeus, 1758)
	imerss.org:BCCSN:55789	55789						1						PRESENT				Eschrichtius robustus					iNaturalist:41478								Eschrichtius robustus							Animalia	Chordata	Mammalia	Artiodactyla	Eschrichtiidae	Eschrichtius	robustus		species		(Lilljeborg, 1861)
	imerss.org:BCCSN:55826	55826						18						PRESENT				Orcinus orca					iNaturalist:41521								Orcinus orca							Animalia	Chordata	Mammalia	Artiodactyla	Delphinidae	Orcinus	orca		species		(Linnaeus, 1758)
	imerss.org:BCCSN:55827	55827						5						PRESENT				Orcinus orca					iNaturalist:41521								Orcinus orca							Animalia	Chordata	Mammalia	Artiodactyla	Delphinidae	Orcinus	orca		species		(Linnaeus, 1758)
	imerss.org:BCCSN:55858	55858						3						PRESENT				Orcinus orca					iNaturalist:41521								Orcinus orca							Animalia	Chordata	Mammalia	Artiodactyla	Delphinidae	Orcinus	orca		species		(Linnaeus, 1758)
	imerss.org:BCCSN:56681	56681						10						PRESENT				Orcinus orca					iNaturalist:41521								Orcinus orca							Animalia	Chordata	Mammalia	Artiodactyla	Delphinidae	Orcinus	orca		species		(Linnaeus, 1758)
	imerss.org:BCCSN:56926	56926						1						PRESENT				Eschrichtius robustus					iNaturalist:41478								Eschrichtius robustus							Animalia	Chordata	Mammalia	Artiodactyla	Eschrichtiidae	Eschrichtius	robustus		species		(Lilljeborg, 1861)
	imerss.org:BCCSN:57046	57046						5						PRESENT				Orcinus orca					iNaturalist:41521								Orcinus orca							Animalia	Chordata	Mammalia	Artiodactyla	Delphinidae	Orcinus	orca		species		(Linnaeus, 1758)
	imerss.org:BCCSN:57409	57409						3						PRESENT				Orcinus orca					iNaturalist:41521								Orcinus orca							Animalia	Chordata	Mammalia	Artiodactyla	Delphinidae	Orcinus	orca		species		(Linnaeus, 1758)
	imerss.org:BCCSN:57413	57413						7						PRESENT				Orcinus orca					iNaturalist:41521								Orcinus orca							Animalia	Chordata	Mammalia	Artiodactyla	Delphinidae	Orcinus	orca		species		(Linnaeus, 1758)
	imerss.org:BCCSN:58120	58120												PRESENT				Orcinus orca					iNaturalist:41521								Orcinus orca							Animalia	Chordata	Mammalia	Artiodactyla	Delphinidae	Orcinus	orca		species		(Linnaeus, 1758)
	imerss.org:BCCSN:58165	58165						12						PRESENT				Orcinus orca					iNaturalist:41521								Orcinus orca							Animalia	Chordata	Mammalia	Artiodactyla	Delphinidae	Orcinus	orca		species		(Linnaeus, 1758)
	imerss.org:BCCSN:58189	58189						1						PRESENT				Phocoena phocoena					iNaturalist:41440								Phocoena phocoena							Animalia	Chordata	Mammalia	Artiodactyla	Phocoenidae	Phocoena	phocoena		species		(Linnaeus, 1758)
	imerss.org:BCCSN:58550	58550						1						PRESENT				Megaptera novaeangliae					iNaturalist:41566								Megaptera novaeangliae							Animalia	Chordata	Mammalia	Artiodactyla	Balaenopteridae	Megaptera	novaeangliae		species		(Borowski, 1781)
	imerss.org:BCCSN:58552	58552						1						PRESENT				Phocoena phocoena					iNaturalist:41440								Phocoena phocoena							Animalia	Chordata	Mammalia	Artiodactyla	Phocoenidae	Phocoena	phocoena		species		(Linnaeus, 1758)
	imerss.org:BCCSN:58685	58685						1						PRESENT				Phocoena phocoena					iNaturalist:41440								Phocoena phocoena							Animalia	Chordata	Mammalia	Artiodactyla	Phocoenidae	Phocoena	phocoena		species		(Linnaeus, 1758)
	imerss.org:BCCSN:58854	58854						4						PRESENT				Orcinus orca					iNaturalist:41521								Orcinus orca							Animalia	Chordata	Mammalia	Artiodactyla	Delphinidae	Orcinus	orca		species		(Linnaeus, 1758)
	imerss.org:BCCSN:58866	58866						12						PRESENT				Orcinus orca					iNaturalist:41521								Orcinus orca							Animalia	Chordata	Mammalia	Artiodactyla	Delphinidae	Orcinus	orca		species		(Linnaeus, 1758)
	imerss.org:BCCSN:58877	58877						4						PRESENT				Orcinus orca					iNaturalist:41521								Orcinus orca							Animalia	Chordata	Mammalia	Artiodactyla	Delphinidae	Orcinus	orca		species		(Linnaeus, 1758)
	imerss.org:BCCSN:59180	59180						1						PRESENT				Eschrichtius robustus					iNaturalist:41478								Eschrichtius robustus							Animalia	Chordata	Mammalia	Artiodactyla	Eschrichtiidae	Eschrichtius	robustus		species		(Lilljeborg, 1861)
	imerss.org:BCCSN:59185	59185						1						PRESENT				Megaptera novaeangliae					iNaturalist:41566								Megaptera novaeangliae							Animalia	Chordata	Mammalia	Artiodactyla	Balaenopteridae	Megaptera	novaeangliae		species		(Borowski, 1781)
	imerss.org:BCCSN:59557	59557						30						PRESENT				Orcinus orca					iNaturalist:41521								Orcinus orca							Animalia	Chordata	Mammalia	Artiodactyla	Delphinidae	Orcinus	orca		species		(Linnaeus, 1758)
	imerss.org:BCCSN:59830	59830												PRESENT				Orcinus orca					iNaturalist:41521								Orcinus orca							Animalia	Chordata	Mammalia	Artiodactyla	Delphinidae	Orcinus	orca		species		(Linnaeus, 1758)
	imerss.org:BCCSN:70526	70526						1						PRESENT				Phocoena phocoena					iNaturalist:41440								Phocoena phocoena							Animalia	Chordata	Mammalia	Artiodactyla	Phocoenidae	Phocoena	phocoena		species		(Linnaeus, 1758)
	imerss.org:BCCSN:70625	70625						3						PRESENT				Phocoenoides dalli					iNaturalist:41446								Phocoenoides dalli							Animalia	Chordata	Mammalia	Artiodactyla	Phocoenidae	Phocoenoides	dalli		species		(True, 1885)
	imerss.org:BCCSN:72767	72767						3						PRESENT				Phocoena phocoena					iNaturalist:41440								Phocoena phocoena							Animalia	Chordata	Mammalia	Artiodactyla	Phocoenidae	Phocoena	phocoena		species		(Linnaeus, 1758)
	imerss.org:BCCSN:75162	75162						7						PRESENT				Orcinus orca					iNaturalist:41521								Orcinus orca							Animalia	Chordata	Mammalia	Artiodactyla	Delphinidae	Orcinus	orca		species		(Linnaeus, 1758)
	imerss.org:BCCSN:75370	75370						4						PRESENT				Orcinus orca					iNaturalist:41521								Orcinus orca							Animalia	Chordata	Mammalia	Artiodactyla	Delphinidae	Orcinus	orca		species		(Linnaeus, 1758)
	imerss.org:BCCSN:76061	76061						1						PRESENT				Phocoena phocoena					iNaturalist:41440								Phocoena phocoena							Animalia	Chordata	Mammalia	Artiodactyla	Phocoenidae	Phocoena	phocoena		species		(Linnaeus, 1758)
	imerss.org:BCCSN:76077	76077						6						PRESENT				Orcinus orca					iNaturalist:41521								Orcinus orca							Animalia	Chordata	Mammalia	Artiodactyla	Delphinidae	Orcinus	orca		species		(Linnaeus, 1758)
	imerss.org:BCCSN:76677	76677						12						PRESENT				Orcinus orca					iNaturalist:41521								Orcinus orca							Animalia	Chordata	Mammalia	Artiodactyla	Delphinidae	Orcinus	orca		species		(Linnaeus, 1758)
	imerss.org:BCCSN:76758	76758						5						PRESENT				Orcinus orca					iNaturalist:41521								Orcinus orca							Animalia	Chordata	Mammalia	Artiodactyla	Delphinidae	Orcinus	orca		species		(Linnaeus, 1758)
	imerss.org:BCCSN:76847	76847						25						PRESENT				Orcinus orca					iNaturalist:41521								Orcinus orca							Animalia	Chordata	Mammalia	Artiodactyla	Delphinidae	Orcinus	orca		species		(Linnaeus, 1758)
	imerss.org:BCCSN:77148	77148						7						PRESENT				Orcinus orca					iNaturalist:41521								Orcinus orca							Animalia	Chordata	Mammalia	Artiodactyla	Delphinidae	Orcinus	orca		species		(Linnaeus, 1758)
	imerss.org:BCCSN:77158	77158						1						PRESENT				Orcinus orca					iNaturalist:41521								Orcinus orca							Animalia	Chordata	Mammalia	Artiodactyla	Delphinidae	Orcinus	orca		species		(Linnaeus, 1758)
	imerss.org:BCCSN:77197	77197						12						PRESENT				Orcinus orca					iNaturalist:41521								Orcinus orca							Animalia	Chordata	Mammalia	Artiodactyla	Delphinidae	Orcinus	orca		species		(Linnaeus, 1758)
	imerss.org:BCCSN:77204	77204						3						PRESENT				Phocoena phocoena					iNaturalist:41440								Phocoena phocoena							Animalia	Chordata	Mammalia	Artiodactyla	Phocoenidae	Phocoena	phocoena		species		(Linnaeus, 1758)
	imerss.org:BCCSN:77214	77214						4						PRESENT				Orcinus orca					iNaturalist:41521								Orcinus orca							Animalia	Chordata	Mammalia	Artiodactyla	Delphinidae	Orcinus	orca		species		(Linnaeus, 1758)
	imerss.org:BCCSN:77216	77216						10						PRESENT				Orcinus orca					iNaturalist:41521								Orcinus orca							Animalia	Chordata	Mammalia	Artiodactyla	Delphinidae	Orcinus	orca		species		(Linnaeus, 1758)
	imerss.org:BCCSN:77228	77228						1						PRESENT				Phocoena phocoena					iNaturalist:41440								Phocoena phocoena							Animalia	Chordata	Mammalia	Artiodactyla	Phocoenidae	Phocoena	phocoena		species		(Linnaeus, 1758)
	imerss.org:BCCSN:77229	77229						3						PRESENT				Orcinus orca					iNaturalist:41521								Orcinus orca							Animalia	Chordata	Mammalia	Artiodactyla	Delphinidae	Orcinus	orca		species		(Linnaeus, 1758)
	imerss.org:BCCSN:77233	77233						4						PRESENT				Orcinus orca					iNaturalist:41521								Orcinus orca							Animalia	Chordata	Mammalia	Artiodactyla	Delphinidae	Orcinus	orca		species		(Linnaeus, 1758)
	imerss.org:BCCSN:77298	77298						1						PRESENT				Phocoena phocoena					iNaturalist:41440								Phocoena phocoena							Animalia	Chordata	Mammalia	Artiodactyla	Phocoenidae	Phocoena	phocoena		species		(Linnaeus, 1758)
	imerss.org:BCCSN:77343	77343						5						PRESENT				Phocoenoides dalli					iNaturalist:41446								Phocoenoides dalli							Animalia	Chordata	Mammalia	Artiodactyla	Phocoenidae	Phocoenoides	dalli		species		(True, 1885)
	imerss.org:BCCSN:78122	78122						4						PRESENT				Orcinus orca					iNaturalist:41521								Orcinus orca							Animalia	Chordata	Mammalia	Artiodactyla	Delphinidae	Orcinus	orca		species		(Linnaeus, 1758)
	imerss.org:BCCSN:78245	78245						5						PRESENT				Orcinus orca					iNaturalist:41521								Orcinus orca							Animalia	Chordata	Mammalia	Artiodactyla	Delphinidae	Orcinus	orca		species		(Linnaeus, 1758)
	imerss.org:BCCSN:78303	78303						12						PRESENT				Orcinus orca					iNaturalist:41521								Orcinus orca							Animalia	Chordata	Mammalia	Artiodactyla	Delphinidae	Orcinus	orca		species		(Linnaeus, 1758)
	imerss.org:BCCSN:78370	78370						7						PRESENT				Orcinus orca					iNaturalist:41521								Orcinus orca							Animalia	Chordata	Mammalia	Artiodactyla	Delphinidae	Orcinus	orca		species		(Linnaeus, 1758)
	imerss.org:BCCSN:78589	78589						8						PRESENT				Orcinus orca					iNaturalist:41521								Orcinus orca							Animalia	Chordata	Mammalia	Artiodactyla	Delphinidae	Orcinus	orca		species		(Linnaeus, 1758)
	imerss.org:BCCSN:79199	79199						1						PRESENT				Megaptera novaeangliae					iNaturalist:41566								Megaptera novaeangliae							Animalia	Chordata	Mammalia	Artiodactyla	Balaenopteridae	Megaptera	novaeangliae		species		(Borowski, 1781)
	imerss.org:BCCSN:79212	79212						3						PRESENT				Phocoenoides dalli					iNaturalist:41446								Phocoenoides dalli							Animalia	Chordata	Mammalia	Artiodactyla	Phocoenidae	Phocoenoides	dalli		species		(True, 1885)
	imerss.org:BCCSN:79414	79414						1						PRESENT				Phocoena phocoena					iNaturalist:41440								Phocoena phocoena							Animalia	Chordata	Mammalia	Artiodactyla	Phocoenidae	Phocoena	phocoena		species		(Linnaeus, 1758)
	imerss.org:BCCSN:79415	79415						5						PRESENT				Orcinus orca					iNaturalist:41521								Orcinus orca							Animalia	Chordata	Mammalia	Artiodactyla	Delphinidae	Orcinus	orca		species		(Linnaeus, 1758)
	imerss.org:BCCSN:79424	79424						12						PRESENT				Orcinus orca					iNaturalist:41521								Orcinus orca							Animalia	Chordata	Mammalia	Artiodactyla	Delphinidae	Orcinus	orca		species		(Linnaeus, 1758)
	imerss.org:BCCSN:79425	79425						12						PRESENT				Orcinus orca					iNaturalist:41521								Orcinus orca							Animalia	Chordata	Mammalia	Artiodactyla	Delphinidae	Orcinus	orca		species		(Linnaeus, 1758)
	imerss.org:BCCSN:79426	79426						5						PRESENT				Orcinus orca					iNaturalist:41521								Orcinus orca							Animalia	Chordata	Mammalia	Artiodactyla	Delphinidae	Orcinus	orca		species		(Linnaeus, 1758)
	imerss.org:BCCSN:79434	79434						2						PRESENT				Phocoena phocoena					iNaturalist:41440								Phocoena phocoena							Animalia	Chordata	Mammalia	Artiodactyla	Phocoenidae	Phocoena	phocoena		species		(Linnaeus, 1758)
	imerss.org:BCCSN:79439	79439						2						PRESENT				Phocoena phocoena					iNaturalist:41440								Phocoena phocoena							Animalia	Chordata	Mammalia	Artiodactyla	Phocoenidae	Phocoena	phocoena		species		(Linnaeus, 1758)
	imerss.org:BCCSN:79440	79440						3						PRESENT				Phocoena phocoena					iNaturalist:41440								Phocoena phocoena							Animalia	Chordata	Mammalia	Artiodactyla	Phocoenidae	Phocoena	phocoena		species		(Linnaeus, 1758)
	imerss.org:BCCSN:79914	79914						1						PRESENT				Megaptera novaeangliae					iNaturalist:41566								Megaptera novaeangliae							Animalia	Chordata	Mammalia	Artiodactyla	Balaenopteridae	Megaptera	novaeangliae		species		(Borowski, 1781)
	imerss.org:BCCSN:79993	79993						1						PRESENT				Megaptera novaeangliae					iNaturalist:41566								Megaptera novaeangliae							Animalia	Chordata	Mammalia	Artiodactyla	Balaenopteridae	Megaptera	novaeangliae		species		(Borowski, 1781)
	imerss.org:BCCSN:80609	80609						1						PRESENT				Megaptera novaeangliae					iNaturalist:41566								Megaptera novaeangliae							Animalia	Chordata	Mammalia	Artiodactyla	Balaenopteridae	Megaptera	novaeangliae		species		(Borowski, 1781)
	imerss.org:BCCSN:81288	81288						2						PRESENT				Phocoena phocoena					iNaturalist:41440								Phocoena phocoena							Animalia	Chordata	Mammalia	Artiodactyla	Phocoenidae	Phocoena	phocoena		species		(Linnaeus, 1758)
	imerss.org:BCCSN:81918	81918						2						PRESENT				Orcinus orca					iNaturalist:41521								Orcinus orca							Animalia	Chordata	Mammalia	Artiodactyla	Delphinidae	Orcinus	orca		species		(Linnaeus, 1758)
	imerss.org:BCCSN:82268	82268						3						PRESENT				Orcinus orca					iNaturalist:41521								Orcinus orca							Animalia	Chordata	Mammalia	Artiodactyla	Delphinidae	Orcinus	orca		species		(Linnaeus, 1758)
	imerss.org:BCCSN:82433	82433						4						PRESENT				Orcinus orca					iNaturalist:41521								Orcinus orca							Animalia	Chordata	Mammalia	Artiodactyla	Delphinidae	Orcinus	orca		species		(Linnaeus, 1758)
	imerss.org:BCCSN:82434	82434						5						PRESENT				Orcinus orca					iNaturalist:41521								Orcinus orca							Animalia	Chordata	Mammalia	Artiodactyla	Delphinidae	Orcinus	orca		species		(Linnaeus, 1758)
	imerss.org:BCCSN:82435	82435						8						PRESENT				Orcinus orca					iNaturalist:41521								Orcinus orca							Animalia	Chordata	Mammalia	Artiodactyla	Delphinidae	Orcinus	orca		species		(Linnaeus, 1758)
	imerss.org:BCCSN:82439	82439						2						PRESENT				Orcinus orca					iNaturalist:41521								Orcinus orca							Animalia	Chordata	Mammalia	Artiodactyla	Delphinidae	Orcinus	orca		species		(Linnaeus, 1758)
	imerss.org:BCCSN:82440	82440						3						PRESENT				Orcinus orca					iNaturalist:41521								Orcinus orca							Animalia	Chordata	Mammalia	Artiodactyla	Delphinidae	Orcinus	orca		species		(Linnaeus, 1758)
	imerss.org:BCCSN:82895	82895						7						PRESENT				Orcinus orca					iNaturalist:41521								Orcinus orca							Animalia	Chordata	Mammalia	Artiodactyla	Delphinidae	Orcinus	orca		species		(Linnaeus, 1758)
	imerss.org:BCCSN:82896	82896						5						PRESENT				Orcinus orca					iNaturalist:41521								Orcinus orca							Animalia	Chordata	Mammalia	Artiodactyla	Delphinidae	Orcinus	orca		species		(Linnaeus, 1758)
	imerss.org:BCCSN:83467	83467						1						PRESENT				Megaptera novaeangliae					iNaturalist:41566								Megaptera novaeangliae							Animalia	Chordata	Mammalia	Artiodactyla	Balaenopteridae	Megaptera	novaeangliae		species		(Borowski, 1781)
	imerss.org:BCCSN:83523	83523						1						PRESENT				Megaptera novaeangliae					iNaturalist:41566								Megaptera novaeangliae							Animalia	Chordata	Mammalia	Artiodactyla	Balaenopteridae	Megaptera	novaeangliae		species		(Borowski, 1781)
	imerss.org:BCCSN:83524	83524						6						PRESENT				Orcinus orca					iNaturalist:41521								Orcinus orca							Animalia	Chordata	Mammalia	Artiodactyla	Delphinidae	Orcinus	orca		species		(Linnaeus, 1758)
	imerss.org:BCCSN:83527	83527						4						PRESENT				Orcinus orca					iNaturalist:41521								Orcinus orca							Animalia	Chordata	Mammalia	Artiodactyla	Delphinidae	Orcinus	orca		species		(Linnaeus, 1758)
	imerss.org:BCCSN:83582	83582						11						PRESENT				Orcinus orca					iNaturalist:41521								Orcinus orca							Animalia	Chordata	Mammalia	Artiodactyla	Delphinidae	Orcinus	orca		species		(Linnaeus, 1758)
	imerss.org:BCCSN:83914	83914						1						PRESENT				Megaptera novaeangliae					iNaturalist:41566								Megaptera novaeangliae							Animalia	Chordata	Mammalia	Artiodactyla	Balaenopteridae	Megaptera	novaeangliae		species		(Borowski, 1781)
	imerss.org:BCCSN:84403	84403						10						PRESENT				Orcinus orca					iNaturalist:41521								Orcinus orca							Animalia	Chordata	Mammalia	Artiodactyla	Delphinidae	Orcinus	orca		species		(Linnaeus, 1758)
	imerss.org:BCCSN:84553	84553						4						PRESENT				Orcinus orca					iNaturalist:41521								Orcinus orca							Animalia	Chordata	Mammalia	Artiodactyla	Delphinidae	Orcinus	orca		species		(Linnaeus, 1758)
	imerss.org:BCCSN:84599	84599						4						PRESENT				Orcinus orca					iNaturalist:41521								Orcinus orca							Animalia	Chordata	Mammalia	Artiodactyla	Delphinidae	Orcinus	orca		species		(Linnaeus, 1758)
	imerss.org:BCCSN:84640	84640						1						PRESENT				Orcinus orca					iNaturalist:41521								Orcinus orca							Animalia	Chordata	Mammalia	Artiodactyla	Delphinidae	Orcinus	orca		species		(Linnaeus, 1758)
	imerss.org:BCCSN:84641	84641						4						PRESENT				Orcinus orca					iNaturalist:41521								Orcinus orca							Animalia	Chordata	Mammalia	Artiodactyla	Delphinidae	Orcinus	orca		species		(Linnaeus, 1758)
	imerss.org:BCCSN:84677	84677						15						PRESENT				Orcinus orca					iNaturalist:41521								Orcinus orca							Animalia	Chordata	Mammalia	Artiodactyla	Delphinidae	Orcinus	orca		species		(Linnaeus, 1758)
	imerss.org:BCCSN:84708	84708						5						PRESENT				Orcinus orca					iNaturalist:41521								Orcinus orca							Animalia	Chordata	Mammalia	Artiodactyla	Delphinidae	Orcinus	orca		species		(Linnaeus, 1758)
	imerss.org:BCCSN:84752	84752						2						PRESENT				Orcinus orca					iNaturalist:41521								Orcinus orca							Animalia	Chordata	Mammalia	Artiodactyla	Delphinidae	Orcinus	orca		species		(Linnaeus, 1758)
	imerss.org:BCCSN:84802	84802						2						PRESENT				Orcinus orca					iNaturalist:41521								Orcinus orca							Animalia	Chordata	Mammalia	Artiodactyla	Delphinidae	Orcinus	orca		species		(Linnaeus, 1758)
	imerss.org:BCCSN:85607	85607						13						PRESENT				Orcinus orca					iNaturalist:41521								Orcinus orca							Animalia	Chordata	Mammalia	Artiodactyla	Delphinidae	Orcinus	orca		species		(Linnaeus, 1758)
	imerss.org:BCCSN:85702	85702						12						PRESENT				Lagenorhynchus obliquidens					iNaturalist:41510								Lagenorhynchus obliquidens							Animalia	Chordata	Mammalia	Artiodactyla	Delphinidae	Lagenorhynchus	obliquidens		species		Gill, 1865
	imerss.org:BCCSN:85867	85867						1						PRESENT				Megaptera novaeangliae					iNaturalist:41566								Megaptera novaeangliae							Animalia	Chordata	Mammalia	Artiodactyla	Balaenopteridae	Megaptera	novaeangliae		species		(Borowski, 1781)
	imerss.org:BCCSN:85912	85912						2						PRESENT				Megaptera novaeangliae					iNaturalist:41566								Megaptera novaeangliae							Animalia	Chordata	Mammalia	Artiodactyla	Balaenopteridae	Megaptera	novaeangliae		species		(Borowski, 1781)
	imerss.org:BCCSN:85975	85975						10						PRESENT				Orcinus orca					iNaturalist:41521								Orcinus orca							Animalia	Chordata	Mammalia	Artiodactyla	Delphinidae	Orcinus	orca		species		(Linnaeus, 1758)
	imerss.org:BCCSN:87191	87191						2						PRESENT				Phocoena phocoena					iNaturalist:41440								Phocoena phocoena							Animalia	Chordata	Mammalia	Artiodactyla	Phocoenidae	Phocoena	phocoena		species		(Linnaeus, 1758)
	imerss.org:BCCSN:88709	88709						1						PRESENT				Orcinus orca					iNaturalist:41521								Orcinus orca							Animalia	Chordata	Mammalia	Artiodactyla	Delphinidae	Orcinus	orca		species		(Linnaeus, 1758)
	imerss.org:BCCSN:89399	89399						1						PRESENT				Orcinus orca					iNaturalist:41521								Orcinus orca							Animalia	Chordata	Mammalia	Artiodactyla	Delphinidae	Orcinus	orca		species		(Linnaeus, 1758)
	imerss.org:BCCSN:89407	89407						2						PRESENT				Orcinus orca					iNaturalist:41521								Orcinus orca							Animalia	Chordata	Mammalia	Artiodactyla	Delphinidae	Orcinus	orca		species		(Linnaeus, 1758)
	imerss.org:BCCSN:89410	89410						5						PRESENT				Orcinus orca					iNaturalist:41521								Orcinus orca							Animalia	Chordata	Mammalia	Artiodactyla	Delphinidae	Orcinus	orca		species		(Linnaeus, 1758)
	imerss.org:BCCSN:89465	89465						5						PRESENT				Orcinus orca					iNaturalist:41521								Orcinus orca							Animalia	Chordata	Mammalia	Artiodactyla	Delphinidae	Orcinus	orca		species		(Linnaeus, 1758)
	imerss.org:BCCSN:89668	89668						8						PRESENT				Orcinus orca					iNaturalist:41521								Orcinus orca							Animalia	Chordata	Mammalia	Artiodactyla	Delphinidae	Orcinus	orca		species		(Linnaeus, 1758)
	imerss.org:BCCSN:89688	89688						11						PRESENT				Orcinus orca					iNaturalist:41521								Orcinus orca							Animalia	Chordata	Mammalia	Artiodactyla	Delphinidae	Orcinus	orca		species		(Linnaeus, 1758)
	imerss.org:BCCSN:90226	90226						2						PRESENT				Megaptera novaeangliae					iNaturalist:41566								Megaptera novaeangliae							Animalia	Chordata	Mammalia	Artiodactyla	Balaenopteridae	Megaptera	novaeangliae		species		(Borowski, 1781)
	imerss.org:BCCSN:90307	90307						1						PRESENT				Phocoena phocoena					iNaturalist:41440								Phocoena phocoena							Animalia	Chordata	Mammalia	Artiodactyla	Phocoenidae	Phocoena	phocoena		species		(Linnaeus, 1758)
	imerss.org:BCCSN:90432	90432						1						PRESENT				Phocoena phocoena					iNaturalist:41440								Phocoena phocoena							Animalia	Chordata	Mammalia	Artiodactyla	Phocoenidae	Phocoena	phocoena		species		(Linnaeus, 1758)
	imerss.org:BCCSN:90802	90802												PRESENT				Megaptera novaeangliae					iNaturalist:41566								Megaptera novaeangliae							Animalia	Chordata	Mammalia	Artiodactyla	Balaenopteridae	Megaptera	novaeangliae		species		(Borowski, 1781)
	imerss.org:BCCSN:90814	90814						5						PRESENT				Orcinus orca					iNaturalist:41521								Orcinus orca							Animalia	Chordata	Mammalia	Artiodactyla	Delphinidae	Orcinus	orca		species		(Linnaeus, 1758)
	imerss.org:BCCSN:90958	90958						20						PRESENT				Orcinus orca					iNaturalist:41521								Orcinus orca							Animalia	Chordata	Mammalia	Artiodactyla	Delphinidae	Orcinus	orca		species		(Linnaeus, 1758)
	imerss.org:BCCSN:91084	91084						2						PRESENT				Megaptera novaeangliae					iNaturalist:41566								Megaptera novaeangliae							Animalia	Chordata	Mammalia	Artiodactyla	Balaenopteridae	Megaptera	novaeangliae		species		(Borowski, 1781)
	imerss.org:BCCSN:91165	91165						2						PRESENT				Orcinus orca					iNaturalist:41521								Orcinus orca							Animalia	Chordata	Mammalia	Artiodactyla	Delphinidae	Orcinus	orca		species		(Linnaeus, 1758)
	imerss.org:BCCSN:91244	91244						1						PRESENT				Megaptera novaeangliae					iNaturalist:41566								Megaptera novaeangliae							Animalia	Chordata	Mammalia	Artiodactyla	Balaenopteridae	Megaptera	novaeangliae		species		(Borowski, 1781)
	imerss.org:BCCSN:91615	91615						3						PRESENT				Orcinus orca					iNaturalist:41521								Orcinus orca							Animalia	Chordata	Mammalia	Artiodactyla	Delphinidae	Orcinus	orca		species		(Linnaeus, 1758)
	imerss.org:BCCSN:92394	92394						3						PRESENT				Orcinus orca					iNaturalist:41521								Orcinus orca							Animalia	Chordata	Mammalia	Artiodactyla	Delphinidae	Orcinus	orca		species		(Linnaeus, 1758)
	imerss.org:BCCSN:92720	92720												PRESENT				Orcinus orca					iNaturalist:41521								Orcinus orca							Animalia	Chordata	Mammalia	Artiodactyla	Delphinidae	Orcinus	orca		species		(Linnaeus, 1758)
	imerss.org:BCCSN:92721	92721												PRESENT				Orcinus orca					iNaturalist:41521								Orcinus orca							Animalia	Chordata	Mammalia	Artiodactyla	Delphinidae	Orcinus	orca		species		(Linnaeus, 1758)
	imerss.org:BCCSN:93047	93047						4						PRESENT				Orcinus orca					iNaturalist:41521								Orcinus orca							Animalia	Chordata	Mammalia	Artiodactyla	Delphinidae	Orcinus	orca		species		(Linnaeus, 1758)
	imerss.org:BCCSN:93052	93052						3						PRESENT				Orcinus orca					iNaturalist:41521								Orcinus orca							Animalia	Chordata	Mammalia	Artiodactyla	Delphinidae	Orcinus	orca		species		(Linnaeus, 1758)
	imerss.org:BCCSN:93402	93402						2						PRESENT				Megaptera novaeangliae					iNaturalist:41566								Megaptera novaeangliae							Animalia	Chordata	Mammalia	Artiodactyla	Balaenopteridae	Megaptera	novaeangliae		species		(Borowski, 1781)
	imerss.org:BCCSN:94844	94844						12						PRESENT				Orcinus orca					iNaturalist:41521								Orcinus orca							Animalia	Chordata	Mammalia	Artiodactyla	Delphinidae	Orcinus	orca		species		(Linnaeus, 1758)
	imerss.org:BCCSN:95530	95530						1						PRESENT				Phocoenoides dalli					iNaturalist:41446								Phocoenoides dalli							Animalia	Chordata	Mammalia	Artiodactyla	Phocoenidae	Phocoenoides	dalli		species		(True, 1885)
	imerss.org:BCCSN:96090	96090						15						PRESENT				Lagenorhynchus obliquidens					iNaturalist:41510								Lagenorhynchus obliquidens							Animalia	Chordata	Mammalia	Artiodactyla	Delphinidae	Lagenorhynchus	obliquidens		species		Gill, 1865
	imerss.org:BCCSN:96774	96774						9						PRESENT				Orcinus orca					iNaturalist:41521								Orcinus orca							Animalia	Chordata	Mammalia	Artiodactyla	Delphinidae	Orcinus	orca		species		(Linnaeus, 1758)
	imerss.org:BCCSN:97217	97217												PRESENT				Orcinus orca					iNaturalist:41521								Orcinus orca							Animalia	Chordata	Mammalia	Artiodactyla	Delphinidae	Orcinus	orca		species		(Linnaeus, 1758)
	imerss.org:BCCSN:97336	97336						2						PRESENT				Phocoena phocoena					iNaturalist:41440								Phocoena phocoena							Animalia	Chordata	Mammalia	Artiodactyla	Phocoenidae	Phocoena	phocoena		species		(Linnaeus, 1758)
	imerss.org:BCCSN:97340	97340						4						PRESENT				Phocoena phocoena					iNaturalist:41440								Phocoena phocoena							Animalia	Chordata	Mammalia	Artiodactyla	Phocoenidae	Phocoena	phocoena		species		(Linnaeus, 1758)
	imerss.org:BCCSN:98016	98016						15						PRESENT				Orcinus orca					iNaturalist:41521								Orcinus orca							Animalia	Chordata	Mammalia	Artiodactyla	Delphinidae	Orcinus	orca		species		(Linnaeus, 1758)
	imerss.org:BCCSN:98783	98783						2						PRESENT				Orcinus orca					iNaturalist:41521								Orcinus orca							Animalia	Chordata	Mammalia	Artiodactyla	Delphinidae	Orcinus	orca		species		(Linnaeus, 1758)
	imerss.org:BCCSN:99085	99085						1						PRESENT				Orcinus orca					iNaturalist:41521								Orcinus orca							Animalia	Chordata	Mammalia	Artiodactyla	Delphinidae	Orcinus	orca		species		(Linnaeus, 1758)
	imerss.org:BCCSN:99482	99482						11						PRESENT				Orcinus orca					iNaturalist:41521								Orcinus orca							Animalia	Chordata	Mammalia	Artiodactyla	Delphinidae	Orcinus	orca		species		(Linnaeus, 1758)
	imerss.org:BCCSN:99502	99502												PRESENT				Orcinus orca					iNaturalist:41521								Orcinus orca							Animalia	Chordata	Mammalia	Artiodactyla	Delphinidae	Orcinus	orca		species		(Linnaeus, 1758)
	imerss.org:BCCSN:99519	99519						4						PRESENT				Orcinus orca					iNaturalist:41521								Orcinus orca							Animalia	Chordata	Mammalia	Artiodactyla	Delphinidae	Orcinus	orca		species		(Linnaeus, 1758)
	imerss.org:BCCSN:99973	99973						5						PRESENT				Orcinus orca					iNaturalist:41521								Orcinus orca							Animalia	Chordata	Mammalia	Artiodactyla	Delphinidae	Orcinus	orca		species		(Linnaeus, 1758)
	imerss.org:BCCSN:100179	100179						15						PRESENT				Orcinus orca					iNaturalist:41521								Orcinus orca							Animalia	Chordata	Mammalia	Artiodactyla	Delphinidae	Orcinus	orca		species		(Linnaeus, 1758)
	imerss.org:BCCSN:100184	100184						7						PRESENT				Orcinus orca					iNaturalist:41521								Orcinus orca							Animalia	Chordata	Mammalia	Artiodactyla	Delphinidae	Orcinus	orca		species		(Linnaeus, 1758)
	imerss.org:BCCSN:100197	100197						5						PRESENT				Orcinus orca					iNaturalist:41521								Orcinus orca							Animalia	Chordata	Mammalia	Artiodactyla	Delphinidae	Orcinus	orca		species		(Linnaeus, 1758)
	imerss.org:BCCSN:100865	100865						2						PRESENT				Orcinus orca					iNaturalist:41521								Orcinus orca							Animalia	Chordata	Mammalia	Artiodactyla	Delphinidae	Orcinus	orca		species		(Linnaeus, 1758)
	imerss.org:BCCSN:101307	101307						2						PRESENT				Megaptera novaeangliae					iNaturalist:41566								Megaptera novaeangliae							Animalia	Chordata	Mammalia	Artiodactyla	Balaenopteridae	Megaptera	novaeangliae		species		(Borowski, 1781)
	imerss.org:BCCSN:101390	101390						3						PRESENT				Orcinus orca					iNaturalist:41521								Orcinus orca							Animalia	Chordata	Mammalia	Artiodactyla	Delphinidae	Orcinus	orca		species		(Linnaeus, 1758)
	imerss.org:BCCSN:101442	101442						2						PRESENT				Megaptera novaeangliae					iNaturalist:41566								Megaptera novaeangliae							Animalia	Chordata	Mammalia	Artiodactyla	Balaenopteridae	Megaptera	novaeangliae		species		(Borowski, 1781)
	imerss.org:BCCSN:102394	102394						3						PRESENT				Megaptera novaeangliae					iNaturalist:41566								Megaptera novaeangliae							Animalia	Chordata	Mammalia	Artiodactyla	Balaenopteridae	Megaptera	novaeangliae		species		(Borowski, 1781)
	imerss.org:BCCSN:102651	102651						1						PRESENT				Phocoena phocoena					iNaturalist:41440								Phocoena phocoena							Animalia	Chordata	Mammalia	Artiodactyla	Phocoenidae	Phocoena	phocoena		species		(Linnaeus, 1758)
	imerss.org:BCCSN:102652	102652						1						PRESENT				Orcinus orca					iNaturalist:41521								Orcinus orca							Animalia	Chordata	Mammalia	Artiodactyla	Delphinidae	Orcinus	orca		species		(Linnaeus, 1758)
	imerss.org:BCCSN:104837	104837						2						PRESENT				Megaptera novaeangliae					iNaturalist:41566								Megaptera novaeangliae							Animalia	Chordata	Mammalia	Artiodactyla	Balaenopteridae	Megaptera	novaeangliae		species		(Borowski, 1781)
	imerss.org:BCCSN:105085	105085						1						PRESENT				Orcinus orca					iNaturalist:41521								Orcinus orca							Animalia	Chordata	Mammalia	Artiodactyla	Delphinidae	Orcinus	orca		species		(Linnaeus, 1758)
	imerss.org:BCCSN:105178	105178						8						PRESENT				Orcinus orca					iNaturalist:41521								Orcinus orca							Animalia	Chordata	Mammalia	Artiodactyla	Delphinidae	Orcinus	orca		species		(Linnaeus, 1758)
	imerss.org:BCCSN:105324	105324						30						PRESENT				Orcinus orca					iNaturalist:41521								Orcinus orca							Animalia	Chordata	Mammalia	Artiodactyla	Delphinidae	Orcinus	orca		species		(Linnaeus, 1758)
	imerss.org:BCCSN:105326	105326						30						PRESENT				Orcinus orca					iNaturalist:41521								Orcinus orca							Animalia	Chordata	Mammalia	Artiodactyla	Delphinidae	Orcinus	orca		species		(Linnaeus, 1758)
	imerss.org:BCCSN:105328	105328						40						PRESENT				Orcinus orca					iNaturalist:41521								Orcinus orca							Animalia	Chordata	Mammalia	Artiodactyla	Delphinidae	Orcinus	orca		species		(Linnaeus, 1758)
	imerss.org:BCCSN:105356	105356						5						PRESENT				Orcinus orca					iNaturalist:41521								Orcinus orca							Animalia	Chordata	Mammalia	Artiodactyla	Delphinidae	Orcinus	orca		species		(Linnaeus, 1758)
	imerss.org:BCCSN:105473	105473						1						PRESENT				Megaptera novaeangliae					iNaturalist:41566								Megaptera novaeangliae							Animalia	Chordata	Mammalia	Artiodactyla	Balaenopteridae	Megaptera	novaeangliae		species		(Borowski, 1781)
	imerss.org:BCCSN:105769	105769						2						PRESENT				Phocoena phocoena					iNaturalist:41440								Phocoena phocoena							Animalia	Chordata	Mammalia	Artiodactyla	Phocoenidae	Phocoena	phocoena		species		(Linnaeus, 1758)
	imerss.org:BCCSN:106353	106353						3						PRESENT				Orcinus orca					iNaturalist:41521								Orcinus orca							Animalia	Chordata	Mammalia	Artiodactyla	Delphinidae	Orcinus	orca		species		(Linnaeus, 1758)
	imerss.org:BCCSN:106454	106454						1						PRESENT				Orcinus orca					iNaturalist:41521								Orcinus orca							Animalia	Chordata	Mammalia	Artiodactyla	Delphinidae	Orcinus	orca		species		(Linnaeus, 1758)
	imerss.org:BCCSN:106559	106559						3						PRESENT				Orcinus orca					iNaturalist:41521								Orcinus orca							Animalia	Chordata	Mammalia	Artiodactyla	Delphinidae	Orcinus	orca		species		(Linnaeus, 1758)
	imerss.org:BCCSN:106801	106801						1						PRESENT				Phocoena phocoena					iNaturalist:41440								Phocoena phocoena							Animalia	Chordata	Mammalia	Artiodactyla	Phocoenidae	Phocoena	phocoena		species		(Linnaeus, 1758)
	imerss.org:BCCSN:106846	106846						2						PRESENT				Megaptera novaeangliae					iNaturalist:41566								Megaptera novaeangliae							Animalia	Chordata	Mammalia	Artiodactyla	Balaenopteridae	Megaptera	novaeangliae		species		(Borowski, 1781)
	imerss.org:BCCSN:106880	106880						15						PRESENT				Orcinus orca					iNaturalist:41521								Orcinus orca							Animalia	Chordata	Mammalia	Artiodactyla	Delphinidae	Orcinus	orca		species		(Linnaeus, 1758)
	imerss.org:BCCSN:107158	107158						8						PRESENT				Orcinus orca					iNaturalist:41521								Orcinus orca							Animalia	Chordata	Mammalia	Artiodactyla	Delphinidae	Orcinus	orca		species		(Linnaeus, 1758)
	imerss.org:BCCSN:107377	107377						5						PRESENT				Orcinus orca					iNaturalist:41521								Orcinus orca							Animalia	Chordata	Mammalia	Artiodactyla	Delphinidae	Orcinus	orca		species		(Linnaeus, 1758)
	imerss.org:BCCSN:108418	108418						6						PRESENT				Orcinus orca					iNaturalist:41521								Orcinus orca							Animalia	Chordata	Mammalia	Artiodactyla	Delphinidae	Orcinus	orca		species		(Linnaeus, 1758)
	imerss.org:BCCSN:108421	108421						6						PRESENT				Orcinus orca					iNaturalist:41521								Orcinus orca							Animalia	Chordata	Mammalia	Artiodactyla	Delphinidae	Orcinus	orca		species		(Linnaeus, 1758)
	imerss.org:BCCSN:108435	108435						1						PRESENT				Orcinus orca					iNaturalist:41521								Orcinus orca							Animalia	Chordata	Mammalia	Artiodactyla	Delphinidae	Orcinus	orca		species		(Linnaeus, 1758)
	imerss.org:BCCSN:108477	108477						10						PRESENT				Orcinus orca					iNaturalist:41521								Orcinus orca							Animalia	Chordata	Mammalia	Artiodactyla	Delphinidae	Orcinus	orca		species		(Linnaeus, 1758)
	imerss.org:BCCSN:109234	109234						4						PRESENT				Orcinus orca					iNaturalist:41521								Orcinus orca							Animalia	Chordata	Mammalia	Artiodactyla	Delphinidae	Orcinus	orca		species		(Linnaeus, 1758)
	imerss.org:BCCSN:109465	109465						1						PRESENT				Orcinus orca					iNaturalist:41521								Orcinus orca							Animalia	Chordata	Mammalia	Artiodactyla	Delphinidae	Orcinus	orca		species		(Linnaeus, 1758)
	imerss.org:BCCSN:109471	109471						16						PRESENT				Orcinus orca					iNaturalist:41521								Orcinus orca							Animalia	Chordata	Mammalia	Artiodactyla	Delphinidae	Orcinus	orca		species		(Linnaeus, 1758)
	imerss.org:BCCSN:109549	109549						2						PRESENT				Balaenoptera acutorostrata					iNaturalist:41550								Balaenoptera acutorostrata							Animalia	Chordata	Mammalia	Artiodactyla	Balaenopteridae	Balaenoptera	acutorostrata		species		Lacépède, 1804
	imerss.org:BCCSN:109570	109570						5						PRESENT				Orcinus orca					iNaturalist:41521								Orcinus orca							Animalia	Chordata	Mammalia	Artiodactyla	Delphinidae	Orcinus	orca		species		(Linnaeus, 1758)
	imerss.org:BCCSN:109691	109691						2						PRESENT				Megaptera novaeangliae					iNaturalist:41566								Megaptera novaeangliae							Animalia	Chordata	Mammalia	Artiodactyla	Balaenopteridae	Megaptera	novaeangliae		species		(Borowski, 1781)
	imerss.org:BCCSN:110546	110546						1						PRESENT				Megaptera novaeangliae					iNaturalist:41566								Megaptera novaeangliae							Animalia	Chordata	Mammalia	Artiodactyla	Balaenopteridae	Megaptera	novaeangliae		species		(Borowski, 1781)
	imerss.org:BCCSN:110547	110547						2						PRESENT				Megaptera novaeangliae					iNaturalist:41566								Megaptera novaeangliae							Animalia	Chordata	Mammalia	Artiodactyla	Balaenopteridae	Megaptera	novaeangliae		species		(Borowski, 1781)
	imerss.org:BCCSN:110548	110548						2						PRESENT				Megaptera novaeangliae					iNaturalist:41566								Megaptera novaeangliae							Animalia	Chordata	Mammalia	Artiodactyla	Balaenopteridae	Megaptera	novaeangliae		species		(Borowski, 1781)
	imerss.org:BCCSN:110553	110553						6						PRESENT				Phocoena phocoena					iNaturalist:41440								Phocoena phocoena							Animalia	Chordata	Mammalia	Artiodactyla	Phocoenidae	Phocoena	phocoena		species		(Linnaeus, 1758)
	imerss.org:BCCSN:112064	112064						2						PRESENT				Megaptera novaeangliae					iNaturalist:41566								Megaptera novaeangliae							Animalia	Chordata	Mammalia	Artiodactyla	Balaenopteridae	Megaptera	novaeangliae		species		(Borowski, 1781)
	imerss.org:BCCSN:112469	112469						1						PRESENT				Orcinus orca					iNaturalist:41521								Orcinus orca							Animalia	Chordata	Mammalia	Artiodactyla	Delphinidae	Orcinus	orca		species		(Linnaeus, 1758)
	imerss.org:BCCSN:112498	112498						1						PRESENT				Orcinus orca					iNaturalist:41521								Orcinus orca							Animalia	Chordata	Mammalia	Artiodactyla	Delphinidae	Orcinus	orca		species		(Linnaeus, 1758)
	imerss.org:BCCSN:112499	112499						10						PRESENT				Orcinus orca					iNaturalist:41521								Orcinus orca							Animalia	Chordata	Mammalia	Artiodactyla	Delphinidae	Orcinus	orca		species		(Linnaeus, 1758)
	imerss.org:BCCSN:112501	112501						1						PRESENT				Orcinus orca					iNaturalist:41521								Orcinus orca							Animalia	Chordata	Mammalia	Artiodactyla	Delphinidae	Orcinus	orca		species		(Linnaeus, 1758)
	imerss.org:BCCSN:112536	112536						3						PRESENT				Orcinus orca					iNaturalist:41521								Orcinus orca							Animalia	Chordata	Mammalia	Artiodactyla	Delphinidae	Orcinus	orca		species		(Linnaeus, 1758)
	imerss.org:BCCSN:112538	112538						5						PRESENT				Orcinus orca					iNaturalist:41521								Orcinus orca							Animalia	Chordata	Mammalia	Artiodactyla	Delphinidae	Orcinus	orca		species		(Linnaeus, 1758)
	imerss.org:BCCSN:112987	112987						3						PRESENT				Megaptera novaeangliae					iNaturalist:41566								Megaptera novaeangliae							Animalia	Chordata	Mammalia	Artiodactyla	Balaenopteridae	Megaptera	novaeangliae		species		(Borowski, 1781)
	imerss.org:BCCSN:112988	112988						7						PRESENT				Orcinus orca					iNaturalist:41521								Orcinus orca							Animalia	Chordata	Mammalia	Artiodactyla	Delphinidae	Orcinus	orca		species		(Linnaeus, 1758)
	imerss.org:BCCSN:113105	113105						5						PRESENT				Orcinus orca					iNaturalist:41521								Orcinus orca							Animalia	Chordata	Mammalia	Artiodactyla	Delphinidae	Orcinus	orca		species		(Linnaeus, 1758)
	imerss.org:BCCSN:113202	113202						4						PRESENT				Orcinus orca					iNaturalist:41521								Orcinus orca							Animalia	Chordata	Mammalia	Artiodactyla	Delphinidae	Orcinus	orca		species		(Linnaeus, 1758)
	imerss.org:BCCSN:113298	113298						3						PRESENT				Orcinus orca					iNaturalist:41521								Orcinus orca							Animalia	Chordata	Mammalia	Artiodactyla	Delphinidae	Orcinus	orca		species		(Linnaeus, 1758)
	imerss.org:BCCSN:113865	113865						7						PRESENT				Orcinus orca					iNaturalist:41521								Orcinus orca							Animalia	Chordata	Mammalia	Artiodactyla	Delphinidae	Orcinus	orca		species		(Linnaeus, 1758)
	imerss.org:BCCSN:113918	113918						3						PRESENT				Orcinus orca					iNaturalist:41521								Orcinus orca							Animalia	Chordata	Mammalia	Artiodactyla	Delphinidae	Orcinus	orca		species		(Linnaeus, 1758)
	imerss.org:BCCSN:114143	114143						6						PRESENT				Orcinus orca					iNaturalist:41521								Orcinus orca							Animalia	Chordata	Mammalia	Artiodactyla	Delphinidae	Orcinus	orca		species		(Linnaeus, 1758)
	imerss.org:BCCSN:114158	114158						2						PRESENT				Megaptera novaeangliae					iNaturalist:41566								Megaptera novaeangliae							Animalia	Chordata	Mammalia	Artiodactyla	Balaenopteridae	Megaptera	novaeangliae		species		(Borowski, 1781)
	imerss.org:BCCSN:114217	114217						3						PRESENT				Orcinus orca					iNaturalist:41521								Orcinus orca							Animalia	Chordata	Mammalia	Artiodactyla	Delphinidae	Orcinus	orca		species		(Linnaeus, 1758)
	imerss.org:BCCSN:114507	114507						5						PRESENT				Orcinus orca					iNaturalist:41521								Orcinus orca							Animalia	Chordata	Mammalia	Artiodactyla	Delphinidae	Orcinus	orca		species		(Linnaeus, 1758)
	imerss.org:BCCSN:114659	114659						1						PRESENT				Orcinus orca					iNaturalist:41521								Orcinus orca							Animalia	Chordata	Mammalia	Artiodactyla	Delphinidae	Orcinus	orca		species		(Linnaeus, 1758)
	imerss.org:BCCSN:116136	116136						3						PRESENT				Orcinus orca					iNaturalist:41521								Orcinus orca							Animalia	Chordata	Mammalia	Artiodactyla	Delphinidae	Orcinus	orca		species		(Linnaeus, 1758)
	imerss.org:BCCSN:116346	116346						3						PRESENT				Orcinus orca					iNaturalist:41521								Orcinus orca							Animalia	Chordata	Mammalia	Artiodactyla	Delphinidae	Orcinus	orca		species		(Linnaeus, 1758)
	imerss.org:BCCSN:116366	116366						4						PRESENT				Orcinus orca					iNaturalist:41521								Orcinus orca							Animalia	Chordata	Mammalia	Artiodactyla	Delphinidae	Orcinus	orca		species		(Linnaeus, 1758)
	imerss.org:BCCSN:116495	116495						8						PRESENT				Orcinus orca					iNaturalist:41521								Orcinus orca							Animalia	Chordata	Mammalia	Artiodactyla	Delphinidae	Orcinus	orca		species		(Linnaeus, 1758)
	imerss.org:BCCSN:116496	116496						2						PRESENT				Megaptera novaeangliae					iNaturalist:41566								Megaptera novaeangliae							Animalia	Chordata	Mammalia	Artiodactyla	Balaenopteridae	Megaptera	novaeangliae		species		(Borowski, 1781)
	imerss.org:BCCSN:117706	117706						5						PRESENT				Orcinus orca					iNaturalist:41521								Orcinus orca							Animalia	Chordata	Mammalia	Artiodactyla	Delphinidae	Orcinus	orca		species		(Linnaeus, 1758)
	imerss.org:BCCSN:118533	118533						12						PRESENT				Orcinus orca					iNaturalist:41521								Orcinus orca							Animalia	Chordata	Mammalia	Artiodactyla	Delphinidae	Orcinus	orca		species		(Linnaeus, 1758)
	imerss.org:BCCSN:118872	118872						2						PRESENT				Megaptera novaeangliae					iNaturalist:41566								Megaptera novaeangliae							Animalia	Chordata	Mammalia	Artiodactyla	Balaenopteridae	Megaptera	novaeangliae		species		(Borowski, 1781)
	imerss.org:BCCSN:118914	118914						3						PRESENT				Phocoena phocoena					iNaturalist:41440								Phocoena phocoena							Animalia	Chordata	Mammalia	Artiodactyla	Phocoenidae	Phocoena	phocoena		species		(Linnaeus, 1758)
	imerss.org:BCCSN:118920	118920						2						PRESENT				Megaptera novaeangliae					iNaturalist:41566								Megaptera novaeangliae							Animalia	Chordata	Mammalia	Artiodactyla	Balaenopteridae	Megaptera	novaeangliae		species		(Borowski, 1781)
	imerss.org:BCCSN:119055	119055						9						PRESENT				Orcinus orca					iNaturalist:41521								Orcinus orca							Animalia	Chordata	Mammalia	Artiodactyla	Delphinidae	Orcinus	orca		species		(Linnaeus, 1758)
	imerss.org:BCCSN:119155	119155						5						PRESENT				Orcinus orca					iNaturalist:41521								Orcinus orca							Animalia	Chordata	Mammalia	Artiodactyla	Delphinidae	Orcinus	orca		species		(Linnaeus, 1758)
	imerss.org:BCCSN:119394	119394						1						PRESENT				Phocoenoides dalli					iNaturalist:41446								Phocoenoides dalli							Animalia	Chordata	Mammalia	Artiodactyla	Phocoenidae	Phocoenoides	dalli		species		(True, 1885)
	imerss.org:BCCSN:121083	121083						2						PRESENT				Orcinus orca					iNaturalist:41521								Orcinus orca							Animalia	Chordata	Mammalia	Artiodactyla	Delphinidae	Orcinus	orca		species		(Linnaeus, 1758)
	imerss.org:BCCSN:122218	122218						1						PRESENT				Eschrichtius robustus					iNaturalist:41478								Eschrichtius robustus							Animalia	Chordata	Mammalia	Artiodactyla	Eschrichtiidae	Eschrichtius	robustus		species		(Lilljeborg, 1861)
	imerss.org:BCCSN:122291	122291						4						PRESENT				Orcinus orca					iNaturalist:41521								Orcinus orca							Animalia	Chordata	Mammalia	Artiodactyla	Delphinidae	Orcinus	orca		species		(Linnaeus, 1758)
	imerss.org:BCCSN:122365	122365						7						PRESENT				Orcinus orca					iNaturalist:41521								Orcinus orca							Animalia	Chordata	Mammalia	Artiodactyla	Delphinidae	Orcinus	orca		species		(Linnaeus, 1758)
	imerss.org:BCCSN:122949	122949						7						PRESENT				Orcinus orca					iNaturalist:41521								Orcinus orca							Animalia	Chordata	Mammalia	Artiodactyla	Delphinidae	Orcinus	orca		species		(Linnaeus, 1758)
	imerss.org:BCCSN:122959	122959						1						PRESENT				Megaptera novaeangliae					iNaturalist:41566								Megaptera novaeangliae							Animalia	Chordata	Mammalia	Artiodactyla	Balaenopteridae	Megaptera	novaeangliae		species		(Borowski, 1781)
	imerss.org:BCCSN:122966	122966						6						PRESENT				Orcinus orca					iNaturalist:41521								Orcinus orca							Animalia	Chordata	Mammalia	Artiodactyla	Delphinidae	Orcinus	orca		species		(Linnaeus, 1758)
	imerss.org:BCCSN:123062	123062						3						PRESENT				Orcinus orca					iNaturalist:41521								Orcinus orca							Animalia	Chordata	Mammalia	Artiodactyla	Delphinidae	Orcinus	orca		species		(Linnaeus, 1758)
	imerss.org:BCCSN:123086	123086						5						PRESENT				Orcinus orca					iNaturalist:41521								Orcinus orca							Animalia	Chordata	Mammalia	Artiodactyla	Delphinidae	Orcinus	orca		species		(Linnaeus, 1758)
	imerss.org:BCCSN:123099	123099						2						PRESENT				Megaptera novaeangliae					iNaturalist:41566								Megaptera novaeangliae							Animalia	Chordata	Mammalia	Artiodactyla	Balaenopteridae	Megaptera	novaeangliae		species		(Borowski, 1781)
	imerss.org:BCCSN:123168	123168						1						PRESENT				Balaenoptera physalus					iNaturalist:41562								Balaenoptera physalus							Animalia	Chordata	Mammalia	Artiodactyla	Balaenopteridae	Balaenoptera	physalus		species		(Linnaeus, 1758)
	imerss.org:BCCSN:123285	123285						4						PRESENT				Orcinus orca					iNaturalist:41521								Orcinus orca							Animalia	Chordata	Mammalia	Artiodactyla	Delphinidae	Orcinus	orca		species		(Linnaeus, 1758)
	imerss.org:BCCSN:123860	123860						6						PRESENT				Orcinus orca					iNaturalist:41521								Orcinus orca							Animalia	Chordata	Mammalia	Artiodactyla	Delphinidae	Orcinus	orca		species		(Linnaeus, 1758)
	imerss.org:BCCSN:123866	123866						6						PRESENT				Orcinus orca					iNaturalist:41521								Orcinus orca							Animalia	Chordata	Mammalia	Artiodactyla	Delphinidae	Orcinus	orca		species		(Linnaeus, 1758)
	imerss.org:BCCSN:123891	123891						15						PRESENT				Orcinus orca					iNaturalist:41521								Orcinus orca							Animalia	Chordata	Mammalia	Artiodactyla	Delphinidae	Orcinus	orca		species		(Linnaeus, 1758)
	imerss.org:BCCSN:123917	123917						4						PRESENT				Orcinus orca					iNaturalist:41521								Orcinus orca							Animalia	Chordata	Mammalia	Artiodactyla	Delphinidae	Orcinus	orca		species		(Linnaeus, 1758)
	imerss.org:BCCSN:123918	123918						5						PRESENT				Orcinus orca					iNaturalist:41521								Orcinus orca							Animalia	Chordata	Mammalia	Artiodactyla	Delphinidae	Orcinus	orca		species		(Linnaeus, 1758)
	imerss.org:BCCSN:124078	124078						5						PRESENT				Orcinus orca					iNaturalist:41521								Orcinus orca							Animalia	Chordata	Mammalia	Artiodactyla	Delphinidae	Orcinus	orca		species		(Linnaeus, 1758)
	imerss.org:BCCSN:124162	124162						4						PRESENT				Orcinus orca					iNaturalist:41521								Orcinus orca							Animalia	Chordata	Mammalia	Artiodactyla	Delphinidae	Orcinus	orca		species		(Linnaeus, 1758)
	imerss.org:BCCSN:124233	124233						2						PRESENT				Megaptera novaeangliae					iNaturalist:41566								Megaptera novaeangliae							Animalia	Chordata	Mammalia	Artiodactyla	Balaenopteridae	Megaptera	novaeangliae		species		(Borowski, 1781)
	imerss.org:BCCSN:124257	124257						1						PRESENT				Megaptera novaeangliae					iNaturalist:41566								Megaptera novaeangliae							Animalia	Chordata	Mammalia	Artiodactyla	Balaenopteridae	Megaptera	novaeangliae		species		(Borowski, 1781)
	imerss.org:BCCSN:124560	124560						1						PRESENT				Megaptera novaeangliae					iNaturalist:41566								Megaptera novaeangliae							Animalia	Chordata	Mammalia	Artiodactyla	Balaenopteridae	Megaptera	novaeangliae		species		(Borowski, 1781)
	imerss.org:BCCSN:124804	124804						1						PRESENT				Phocoena phocoena					iNaturalist:41440								Phocoena phocoena							Animalia	Chordata	Mammalia	Artiodactyla	Phocoenidae	Phocoena	phocoena		species		(Linnaeus, 1758)
	imerss.org:BCCSN:125014	125014						1						PRESENT				Phocoena phocoena					iNaturalist:41440								Phocoena phocoena							Animalia	Chordata	Mammalia	Artiodactyla	Phocoenidae	Phocoena	phocoena		species		(Linnaeus, 1758)
	imerss.org:BCCSN:125041	125041						4						PRESENT				Orcinus orca					iNaturalist:41521								Orcinus orca							Animalia	Chordata	Mammalia	Artiodactyla	Delphinidae	Orcinus	orca		species		(Linnaeus, 1758)
	imerss.org:BCCSN:125044	125044						4						PRESENT				Orcinus orca					iNaturalist:41521								Orcinus orca							Animalia	Chordata	Mammalia	Artiodactyla	Delphinidae	Orcinus	orca		species		(Linnaeus, 1758)
	imerss.org:BCCSN:125054	125054						1						PRESENT				Megaptera novaeangliae					iNaturalist:41566								Megaptera novaeangliae							Animalia	Chordata	Mammalia	Artiodactyla	Balaenopteridae	Megaptera	novaeangliae		species		(Borowski, 1781)
	imerss.org:BCCSN:125076	125076						3						PRESENT				Orcinus orca					iNaturalist:41521								Orcinus orca							Animalia	Chordata	Mammalia	Artiodactyla	Delphinidae	Orcinus	orca		species		(Linnaeus, 1758)
	imerss.org:BCCSN:125164	125164						2						PRESENT				Orcinus orca					iNaturalist:41521								Orcinus orca							Animalia	Chordata	Mammalia	Artiodactyla	Delphinidae	Orcinus	orca		species		(Linnaeus, 1758)
	imerss.org:BCCSN:125182	125182						4						PRESENT				Orcinus orca					iNaturalist:41521								Orcinus orca							Animalia	Chordata	Mammalia	Artiodactyla	Delphinidae	Orcinus	orca		species		(Linnaeus, 1758)
	imerss.org:BCCSN:125196	125196						1						PRESENT				Megaptera novaeangliae					iNaturalist:41566								Megaptera novaeangliae							Animalia	Chordata	Mammalia	Artiodactyla	Balaenopteridae	Megaptera	novaeangliae		species		(Borowski, 1781)
	imerss.org:BCCSN:125197	125197												PRESENT				Orcinus orca					iNaturalist:41521								Orcinus orca							Animalia	Chordata	Mammalia	Artiodactyla	Delphinidae	Orcinus	orca		species		(Linnaeus, 1758)
	imerss.org:BCCSN:125516	125516						1						PRESENT				Megaptera novaeangliae					iNaturalist:41566								Megaptera novaeangliae							Animalia	Chordata	Mammalia	Artiodactyla	Balaenopteridae	Megaptera	novaeangliae		species		(Borowski, 1781)
	imerss.org:BCCSN:125524	125524						3						PRESENT				Orcinus orca					iNaturalist:41521								Orcinus orca							Animalia	Chordata	Mammalia	Artiodactyla	Delphinidae	Orcinus	orca		species		(Linnaeus, 1758)
	imerss.org:BCCSN:126060	126060						8						PRESENT				Orcinus orca					iNaturalist:41521								Orcinus orca							Animalia	Chordata	Mammalia	Artiodactyla	Delphinidae	Orcinus	orca		species		(Linnaeus, 1758)
	imerss.org:BCCSN:126282	126282						4						PRESENT				Megaptera novaeangliae					iNaturalist:41566								Megaptera novaeangliae							Animalia	Chordata	Mammalia	Artiodactyla	Balaenopteridae	Megaptera	novaeangliae		species		(Borowski, 1781)
	imerss.org:BCCSN:126419	126419						1						PRESENT				Megaptera novaeangliae					iNaturalist:41566								Megaptera novaeangliae							Animalia	Chordata	Mammalia	Artiodactyla	Balaenopteridae	Megaptera	novaeangliae		species		(Borowski, 1781)
	imerss.org:BCCSN:126777	126777						3						PRESENT				Orcinus orca					iNaturalist:41521								Orcinus orca							Animalia	Chordata	Mammalia	Artiodactyla	Delphinidae	Orcinus	orca		species		(Linnaeus, 1758)
	imerss.org:BCCSN:126781	126781						3						PRESENT				Orcinus orca					iNaturalist:41521								Orcinus orca							Animalia	Chordata	Mammalia	Artiodactyla	Delphinidae	Orcinus	orca		species		(Linnaeus, 1758)
	imerss.org:BCCSN:128294	128294						4						PRESENT				Orcinus orca					iNaturalist:41521								Orcinus orca							Animalia	Chordata	Mammalia	Artiodactyla	Delphinidae	Orcinus	orca		species		(Linnaeus, 1758)
	imerss.org:BCCSN:128619	128619						5						PRESENT				Orcinus orca					iNaturalist:41521								Orcinus orca							Animalia	Chordata	Mammalia	Artiodactyla	Delphinidae	Orcinus	orca		species		(Linnaeus, 1758)
	imerss.org:BCCSN:128750	128750						4						PRESENT				Orcinus orca					iNaturalist:41521								Orcinus orca							Animalia	Chordata	Mammalia	Artiodactyla	Delphinidae	Orcinus	orca		species		(Linnaeus, 1758)
	imerss.org:BCCSN:128788	128788						1						PRESENT				Orcinus orca					iNaturalist:41521								Orcinus orca							Animalia	Chordata	Mammalia	Artiodactyla	Delphinidae	Orcinus	orca		species		(Linnaeus, 1758)
	imerss.org:BCCSN:128807	128807						3						PRESENT				Orcinus orca					iNaturalist:41521								Orcinus orca							Animalia	Chordata	Mammalia	Artiodactyla	Delphinidae	Orcinus	orca		species		(Linnaeus, 1758)
	imerss.org:BCCSN:128913	128913						4						PRESENT				Orcinus orca					iNaturalist:41521								Orcinus orca							Animalia	Chordata	Mammalia	Artiodactyla	Delphinidae	Orcinus	orca		species		(Linnaeus, 1758)
	imerss.org:BCCSN:129013	129013						1						PRESENT				Megaptera novaeangliae					iNaturalist:41566								Megaptera novaeangliae							Animalia	Chordata	Mammalia	Artiodactyla	Balaenopteridae	Megaptera	novaeangliae		species		(Borowski, 1781)
	imerss.org:BCCSN:129032	129032						5						PRESENT				Orcinus orca					iNaturalist:41521								Orcinus orca							Animalia	Chordata	Mammalia	Artiodactyla	Delphinidae	Orcinus	orca		species		(Linnaeus, 1758)
	imerss.org:BCCSN:129134	129134						1						PRESENT				Phocoena phocoena					iNaturalist:41440								Phocoena phocoena							Animalia	Chordata	Mammalia	Artiodactyla	Phocoenidae	Phocoena	phocoena		species		(Linnaeus, 1758)
	imerss.org:BCCSN:129141	129141						8						PRESENT				Orcinus orca					iNaturalist:41521								Orcinus orca							Animalia	Chordata	Mammalia	Artiodactyla	Delphinidae	Orcinus	orca		species		(Linnaeus, 1758)
	imerss.org:BCCSN:129185	129185						26						PRESENT				Orcinus orca					iNaturalist:41521								Orcinus orca							Animalia	Chordata	Mammalia	Artiodactyla	Delphinidae	Orcinus	orca		species		(Linnaeus, 1758)
	imerss.org:BCCSN:129237	129237						6						PRESENT				Phocoena phocoena					iNaturalist:41440								Phocoena phocoena							Animalia	Chordata	Mammalia	Artiodactyla	Phocoenidae	Phocoena	phocoena		species		(Linnaeus, 1758)
	imerss.org:BCCSN:129309	129309						12						PRESENT				Orcinus orca					iNaturalist:41521								Orcinus orca							Animalia	Chordata	Mammalia	Artiodactyla	Delphinidae	Orcinus	orca		species		(Linnaeus, 1758)
	imerss.org:BCCSN:129432	129432						4						PRESENT				Orcinus orca					iNaturalist:41521								Orcinus orca							Animalia	Chordata	Mammalia	Artiodactyla	Delphinidae	Orcinus	orca		species		(Linnaeus, 1758)
	imerss.org:BCCSN:129632	129632						2						PRESENT				Orcinus orca					iNaturalist:41521								Orcinus orca							Animalia	Chordata	Mammalia	Artiodactyla	Delphinidae	Orcinus	orca		species		(Linnaeus, 1758)
	imerss.org:BCCSN:129865	129865						3						PRESENT				Orcinus orca					iNaturalist:41521								Orcinus orca							Animalia	Chordata	Mammalia	Artiodactyla	Delphinidae	Orcinus	orca		species		(Linnaeus, 1758)
	imerss.org:BCCSN:131293	131293						2						PRESENT				Megaptera novaeangliae					iNaturalist:41566								Megaptera novaeangliae							Animalia	Chordata	Mammalia	Artiodactyla	Balaenopteridae	Megaptera	novaeangliae		species		(Borowski, 1781)
	imerss.org:BCCSN:131823	131823						2						PRESENT				Megaptera novaeangliae					iNaturalist:41566								Megaptera novaeangliae							Animalia	Chordata	Mammalia	Artiodactyla	Balaenopteridae	Megaptera	novaeangliae		species		(Borowski, 1781)
	imerss.org:BCCSN:131826	131826						1						PRESENT				Megaptera novaeangliae					iNaturalist:41566								Megaptera novaeangliae							Animalia	Chordata	Mammalia	Artiodactyla	Balaenopteridae	Megaptera	novaeangliae		species		(Borowski, 1781)
	imerss.org:BCCSN:131828	131828						4						PRESENT				Orcinus orca					iNaturalist:41521								Orcinus orca							Animalia	Chordata	Mammalia	Artiodactyla	Delphinidae	Orcinus	orca		species		(Linnaeus, 1758)
	imerss.org:BCCSN:132189	132189						2						PRESENT				Megaptera novaeangliae					iNaturalist:41566								Megaptera novaeangliae							Animalia	Chordata	Mammalia	Artiodactyla	Balaenopteridae	Megaptera	novaeangliae		species		(Borowski, 1781)
	imerss.org:BCCSN:0698a0a7-a285-44c1-9a89-f903b16dbc68	0698a0a7-a285-44c1-9a89-f903b16dbc68						7						PRESENT				Orcinus orca					iNaturalist:41521								Orcinus orca							Animalia	Chordata	Mammalia	Artiodactyla	Delphinidae	Orcinus	orca		species		(Linnaeus, 1758)
	imerss.org:BCCSN:0797ffe1-1f43-48ee-998e-51f73f26ffe5	0797ffe1-1f43-48ee-998e-51f73f26ffe5												PRESENT				Orcinus orca					iNaturalist:41521								Orcinus orca							Animalia	Chordata	Mammalia	Artiodactyla	Delphinidae	Orcinus	orca		species		(Linnaeus, 1758)
	imerss.org:BCCSN:07a47add-f12d-4e4a-a3bb-9998d0b6c9e3	07a47add-f12d-4e4a-a3bb-9998d0b6c9e3												PRESENT				Orcinus orca					iNaturalist:41521								Orcinus orca							Animalia	Chordata	Mammalia	Artiodactyla	Delphinidae	Orcinus	orca		species		(Linnaeus, 1758)
	imerss.org:BCCSN:0CAFD166-D58E-4E80-8F78-4247BEA25F4A	0CAFD166-D58E-4E80-8F78-4247BEA25F4A						5						PRESENT				Orcinus orca					iNaturalist:41521								Orcinus orca							Animalia	Chordata	Mammalia	Artiodactyla	Delphinidae	Orcinus	orca		species		(Linnaeus, 1758)
	imerss.org:BCCSN:0EA38A1F-F374-42BD-9528-C0EC4E70F312	0EA38A1F-F374-42BD-9528-C0EC4E70F312						15						PRESENT				Orcinus orca					iNaturalist:41521								Orcinus orca							Animalia	Chordata	Mammalia	Artiodactyla	Delphinidae	Orcinus	orca		species		(Linnaeus, 1758)
	imerss.org:BCCSN:0ea91369-8ef3-4403-ad74-b1cbb416a362	0ea91369-8ef3-4403-ad74-b1cbb416a362						6						PRESENT				Orcinus orca					iNaturalist:41521								Orcinus orca							Animalia	Chordata	Mammalia	Artiodactyla	Delphinidae	Orcinus	orca		species		(Linnaeus, 1758)
	imerss.org:BCCSN:0F50BB3C-34F6-48AF-9F05-49A90A18513F	0F50BB3C-34F6-48AF-9F05-49A90A18513F						2						PRESENT				Orcinus orca					iNaturalist:41521								Orcinus orca							Animalia	Chordata	Mammalia	Artiodactyla	Delphinidae	Orcinus	orca		species		(Linnaeus, 1758)
	imerss.org:BCCSN:11ff4a33-b14e-41d0-8fdd-4d4d270e5b7a	11ff4a33-b14e-41d0-8fdd-4d4d270e5b7a						4						PRESENT				Orcinus orca					iNaturalist:41521								Orcinus orca							Animalia	Chordata	Mammalia	Artiodactyla	Delphinidae	Orcinus	orca		species		(Linnaeus, 1758)
	imerss.org:BCCSN:12d18763-3e58-4433-8ecd-e5e6f5e3ad42	12d18763-3e58-4433-8ecd-e5e6f5e3ad42												PRESENT				Orcinus orca					iNaturalist:41521								Orcinus orca							Animalia	Chordata	Mammalia	Artiodactyla	Delphinidae	Orcinus	orca		species		(Linnaeus, 1758)
	imerss.org:BCCSN:134ddfea-7c1a-4189-9fc0-03fab3880328	134ddfea-7c1a-4189-9fc0-03fab3880328												PRESENT				Orcinus orca					iNaturalist:41521								Orcinus orca							Animalia	Chordata	Mammalia	Artiodactyla	Delphinidae	Orcinus	orca		species		(Linnaeus, 1758)
	imerss.org:BCCSN:1381d24a-413e-474b-9957-7da9a6e6ca46	1381d24a-413e-474b-9957-7da9a6e6ca46						4						PRESENT				Orcinus orca					iNaturalist:41521								Orcinus orca							Animalia	Chordata	Mammalia	Artiodactyla	Delphinidae	Orcinus	orca		species		(Linnaeus, 1758)
	imerss.org:BCCSN:1807d759-c9e8-4b27-a376-7acc9300be24	1807d759-c9e8-4b27-a376-7acc9300be24												PRESENT				Megaptera novaeangliae					iNaturalist:41566								Megaptera novaeangliae							Animalia	Chordata	Mammalia	Artiodactyla	Balaenopteridae	Megaptera	novaeangliae		species		(Borowski, 1781)
	imerss.org:BCCSN:1936429e-1522-451b-a0d0-9d36ce4aa00a	1936429e-1522-451b-a0d0-9d36ce4aa00a												PRESENT				Megaptera novaeangliae					iNaturalist:41566								Megaptera novaeangliae							Animalia	Chordata	Mammalia	Artiodactyla	Balaenopteridae	Megaptera	novaeangliae		species		(Borowski, 1781)
	imerss.org:BCCSN:1A564A82-8BF2-46C4-B681-C73871335B77	1A564A82-8BF2-46C4-B681-C73871335B77						1						PRESENT				Megaptera novaeangliae					iNaturalist:41566								Megaptera novaeangliae							Animalia	Chordata	Mammalia	Artiodactyla	Balaenopteridae	Megaptera	novaeangliae		species		(Borowski, 1781)
	imerss.org:BCCSN:1B064DFA-F9DE-46EF-8616-691F1E4468C3	1B064DFA-F9DE-46EF-8616-691F1E4468C3						3						PRESENT				Orcinus orca					iNaturalist:41521								Orcinus orca							Animalia	Chordata	Mammalia	Artiodactyla	Delphinidae	Orcinus	orca		species		(Linnaeus, 1758)
	imerss.org:BCCSN:1E774105-0676-456A-9971-91E13D3B0DB5	1E774105-0676-456A-9971-91E13D3B0DB5						12						PRESENT				Orcinus orca					iNaturalist:41521								Orcinus orca							Animalia	Chordata	Mammalia	Artiodactyla	Delphinidae	Orcinus	orca		species		(Linnaeus, 1758)
	imerss.org:BCCSN:25F96A0E-72C3-4856-B8A8-CE45DEF2FE01	25F96A0E-72C3-4856-B8A8-CE45DEF2FE01						5						PRESENT				Orcinus orca					iNaturalist:41521								Orcinus orca							Animalia	Chordata	Mammalia	Artiodactyla	Delphinidae	Orcinus	orca		species		(Linnaeus, 1758)
	imerss.org:BCCSN:26456104-9592-40F2-B56B-ADBBA5C08AE6	26456104-9592-40F2-B56B-ADBBA5C08AE6												PRESENT				Orcinus orca					iNaturalist:41521								Orcinus orca							Animalia	Chordata	Mammalia	Artiodactyla	Delphinidae	Orcinus	orca		species		(Linnaeus, 1758)
	imerss.org:BCCSN:282e66d2-4ea3-43ca-86ef-2931d49e6fe7	282e66d2-4ea3-43ca-86ef-2931d49e6fe7						4						PRESENT				Orcinus orca					iNaturalist:41521								Orcinus orca							Animalia	Chordata	Mammalia	Artiodactyla	Delphinidae	Orcinus	orca		species		(Linnaeus, 1758)
	imerss.org:BCCSN:283b7880-8baa-4f16-8818-813e1a146d3d	283b7880-8baa-4f16-8818-813e1a146d3d						5						PRESENT				Orcinus orca					iNaturalist:41521								Orcinus orca							Animalia	Chordata	Mammalia	Artiodactyla	Delphinidae	Orcinus	orca		species		(Linnaeus, 1758)
	imerss.org:BCCSN:2B2A0A2A-852E-46A5-9DE5-E2032AA64327	2B2A0A2A-852E-46A5-9DE5-E2032AA64327						4						PRESENT				Orcinus orca					iNaturalist:41521								Orcinus orca							Animalia	Chordata	Mammalia	Artiodactyla	Delphinidae	Orcinus	orca		species		(Linnaeus, 1758)
	imerss.org:BCCSN:3230B389-8E31-4240-8113-39E92212BBEF	3230B389-8E31-4240-8113-39E92212BBEF						4						PRESENT				Orcinus orca					iNaturalist:41521								Orcinus orca							Animalia	Chordata	Mammalia	Artiodactyla	Delphinidae	Orcinus	orca		species		(Linnaeus, 1758)
	imerss.org:BCCSN:326964D3-7C90-4742-8F86-8F44DBBA4B05	326964D3-7C90-4742-8F86-8F44DBBA4B05												PRESENT				Orcinus orca					iNaturalist:41521								Orcinus orca							Animalia	Chordata	Mammalia	Artiodactyla	Delphinidae	Orcinus	orca		species		(Linnaeus, 1758)
	imerss.org:BCCSN:327EBE9F-88F0-41F2-9E2B-FAEE62E9883E	327EBE9F-88F0-41F2-9E2B-FAEE62E9883E						6						PRESENT				Orcinus orca					iNaturalist:41521								Orcinus orca							Animalia	Chordata	Mammalia	Artiodactyla	Delphinidae	Orcinus	orca		species		(Linnaeus, 1758)
	imerss.org:BCCSN:342FCF28-4874-40D2-A7E6-00C4E9A3A1A9	342FCF28-4874-40D2-A7E6-00C4E9A3A1A9						2						PRESENT				Megaptera novaeangliae					iNaturalist:41566								Megaptera novaeangliae							Animalia	Chordata	Mammalia	Artiodactyla	Balaenopteridae	Megaptera	novaeangliae		species		(Borowski, 1781)
	imerss.org:BCCSN:347596EE-B760-4DF1-8257-A7EE92CC5BA8	347596EE-B760-4DF1-8257-A7EE92CC5BA8												PRESENT				Megaptera novaeangliae					iNaturalist:41566								Megaptera novaeangliae							Animalia	Chordata	Mammalia	Artiodactyla	Balaenopteridae	Megaptera	novaeangliae		species		(Borowski, 1781)
	imerss.org:BCCSN:34E3902F-0FB0-44F1-8220-A212B88B9E12	34E3902F-0FB0-44F1-8220-A212B88B9E12		Count: 15-22										PRESENT				Orcinus orca					iNaturalist:41521								Orcinus orca							Animalia	Chordata	Mammalia	Artiodactyla	Delphinidae	Orcinus	orca		species		(Linnaeus, 1758)
	imerss.org:BCCSN:355ECCAA-DFED-40C6-B7FF-5C0924C378CE	355ECCAA-DFED-40C6-B7FF-5C0924C378CE						4						PRESENT				Orcinus orca					iNaturalist:41521								Orcinus orca							Animalia	Chordata	Mammalia	Artiodactyla	Delphinidae	Orcinus	orca		species		(Linnaeus, 1758)
	imerss.org:BCCSN:36E130D9-E196-43D7-BBC1-48FA4AC6B112	36E130D9-E196-43D7-BBC1-48FA4AC6B112						5						PRESENT				Orcinus orca					iNaturalist:41521								Orcinus orca							Animalia	Chordata	Mammalia	Artiodactyla	Delphinidae	Orcinus	orca		species		(Linnaeus, 1758)
	imerss.org:BCCSN:3808DE86-67BE-4764-B328-CA8A324B1879	3808DE86-67BE-4764-B328-CA8A324B1879						6						PRESENT				Orcinus orca					iNaturalist:41521								Orcinus orca							Animalia	Chordata	Mammalia	Artiodactyla	Delphinidae	Orcinus	orca		species		(Linnaeus, 1758)
	imerss.org:BCCSN:3a21d2db-156a-4a72-a19d-f4d5ff0e2fae	3a21d2db-156a-4a72-a19d-f4d5ff0e2fae												PRESENT				Orcinus orca					iNaturalist:41521								Orcinus orca							Animalia	Chordata	Mammalia	Artiodactyla	Delphinidae	Orcinus	orca		species		(Linnaeus, 1758)
	imerss.org:BCCSN:3aec4c49-09d1-4421-91d7-78c74358d955	3aec4c49-09d1-4421-91d7-78c74358d955												PRESENT				Megaptera novaeangliae					iNaturalist:41566								Megaptera novaeangliae							Animalia	Chordata	Mammalia	Artiodactyla	Balaenopteridae	Megaptera	novaeangliae		species		(Borowski, 1781)
	imerss.org:BCCSN:3b004d41-1f2e-4561-9d7e-fd553e018c10	3b004d41-1f2e-4561-9d7e-fd553e018c10												PRESENT				Megaptera novaeangliae					iNaturalist:41566								Megaptera novaeangliae							Animalia	Chordata	Mammalia	Artiodactyla	Balaenopteridae	Megaptera	novaeangliae		species		(Borowski, 1781)
	imerss.org:BCCSN:3eaae898-27b2-4366-8116-0b422fbf94f4	3eaae898-27b2-4366-8116-0b422fbf94f4						3						PRESENT				Megaptera novaeangliae					iNaturalist:41566								Megaptera novaeangliae							Animalia	Chordata	Mammalia	Artiodactyla	Balaenopteridae	Megaptera	novaeangliae		species		(Borowski, 1781)
	imerss.org:BCCSN:3F508711-CA44-4306-A4B8-679AC9F91F74	3F508711-CA44-4306-A4B8-679AC9F91F74						5						PRESENT				Orcinus orca					iNaturalist:41521								Orcinus orca							Animalia	Chordata	Mammalia	Artiodactyla	Delphinidae	Orcinus	orca		species		(Linnaeus, 1758)
	imerss.org:BCCSN:3FA23D74-093C-4146-A588-1B1573485E2B	3FA23D74-093C-4146-A588-1B1573485E2B						8						PRESENT				Orcinus orca					iNaturalist:41521								Orcinus orca							Animalia	Chordata	Mammalia	Artiodactyla	Delphinidae	Orcinus	orca		species		(Linnaeus, 1758)
	imerss.org:BCCSN:41A6772D-851E-4BB0-9FF9-7F35ADC62368	41A6772D-851E-4BB0-9FF9-7F35ADC62368						8						PRESENT				Orcinus orca					iNaturalist:41521								Orcinus orca							Animalia	Chordata	Mammalia	Artiodactyla	Delphinidae	Orcinus	orca		species		(Linnaeus, 1758)
	imerss.org:BCCSN:424766D1-3B78-4AD9-BB13-2544CCD26EAB	424766D1-3B78-4AD9-BB13-2544CCD26EAB						1						PRESENT				Megaptera novaeangliae					iNaturalist:41566								Megaptera novaeangliae							Animalia	Chordata	Mammalia	Artiodactyla	Balaenopteridae	Megaptera	novaeangliae		species		(Borowski, 1781)
	imerss.org:BCCSN:4350557C-0D3E-4BB1-B316-B924B7B71322	4350557C-0D3E-4BB1-B316-B924B7B71322						1						PRESENT				Megaptera novaeangliae					iNaturalist:41566								Megaptera novaeangliae							Animalia	Chordata	Mammalia	Artiodactyla	Balaenopteridae	Megaptera	novaeangliae		species		(Borowski, 1781)
	imerss.org:BCCSN:44839870-40F5-423A-B7AC-527BDA887C6E	44839870-40F5-423A-B7AC-527BDA887C6E						4						PRESENT				Orcinus orca					iNaturalist:41521								Orcinus orca							Animalia	Chordata	Mammalia	Artiodactyla	Delphinidae	Orcinus	orca		species		(Linnaeus, 1758)
	imerss.org:BCCSN:48c74bd8-2b6f-4d33-a2ed-613459ebdb3b	48c74bd8-2b6f-4d33-a2ed-613459ebdb3b												PRESENT				Megaptera novaeangliae					iNaturalist:41566								Megaptera novaeangliae							Animalia	Chordata	Mammalia	Artiodactyla	Balaenopteridae	Megaptera	novaeangliae		species		(Borowski, 1781)
	imerss.org:BCCSN:48F8606F-EE94-4891-B623-1BD2F6CDCA5C	48F8606F-EE94-4891-B623-1BD2F6CDCA5C												PRESENT				Megaptera novaeangliae					iNaturalist:41566								Megaptera novaeangliae							Animalia	Chordata	Mammalia	Artiodactyla	Balaenopteridae	Megaptera	novaeangliae		species		(Borowski, 1781)
	imerss.org:BCCSN:4AD41A2D-1B30-4693-8B48-7141B2797F8F	4AD41A2D-1B30-4693-8B48-7141B2797F8F												PRESENT				Orcinus orca					iNaturalist:41521								Orcinus orca							Animalia	Chordata	Mammalia	Artiodactyla	Delphinidae	Orcinus	orca		species		(Linnaeus, 1758)
	imerss.org:BCCSN:5106C3B9-AB22-4F81-93F5-D8D030A2D3BE	5106C3B9-AB22-4F81-93F5-D8D030A2D3BE						5						PRESENT				Orcinus orca					iNaturalist:41521								Orcinus orca							Animalia	Chordata	Mammalia	Artiodactyla	Delphinidae	Orcinus	orca		species		(Linnaeus, 1758)
	imerss.org:BCCSN:52556886-04CF-4327-A596-B6B17B182D41	52556886-04CF-4327-A596-B6B17B182D41						20						PRESENT				Orcinus orca					iNaturalist:41521								Orcinus orca							Animalia	Chordata	Mammalia	Artiodactyla	Delphinidae	Orcinus	orca		species		(Linnaeus, 1758)
	imerss.org:BCCSN:53475461-B3C7-43AD-BDCC-B2AB4BFF97F2	53475461-B3C7-43AD-BDCC-B2AB4BFF97F2						2						PRESENT				Megaptera novaeangliae					iNaturalist:41566								Megaptera novaeangliae							Animalia	Chordata	Mammalia	Artiodactyla	Balaenopteridae	Megaptera	novaeangliae		species		(Borowski, 1781)
	imerss.org:BCCSN:54FC4215-2C40-49CE-828A-AAD6AE513569	54FC4215-2C40-49CE-828A-AAD6AE513569						6						PRESENT				Orcinus orca					iNaturalist:41521								Orcinus orca							Animalia	Chordata	Mammalia	Artiodactyla	Delphinidae	Orcinus	orca		species		(Linnaeus, 1758)
	imerss.org:BCCSN:55BEBE8B-91CD-43E6-8DEE-D4765DDD7823	55BEBE8B-91CD-43E6-8DEE-D4765DDD7823												PRESENT				Megaptera novaeangliae					iNaturalist:41566								Megaptera novaeangliae							Animalia	Chordata	Mammalia	Artiodactyla	Balaenopteridae	Megaptera	novaeangliae		species		(Borowski, 1781)
	imerss.org:BCCSN:56E9B052-686E-44FB-B3A7-59D33A788904	56E9B052-686E-44FB-B3A7-59D33A788904												PRESENT				Megaptera novaeangliae					iNaturalist:41566								Megaptera novaeangliae							Animalia	Chordata	Mammalia	Artiodactyla	Balaenopteridae	Megaptera	novaeangliae		species		(Borowski, 1781)
	imerss.org:BCCSN:577b3392-f7ca-4779-9072-f7f73ec990b2	577b3392-f7ca-4779-9072-f7f73ec990b2						15						PRESENT				Orcinus orca					iNaturalist:41521								Orcinus orca							Animalia	Chordata	Mammalia	Artiodactyla	Delphinidae	Orcinus	orca		species		(Linnaeus, 1758)
	imerss.org:BCCSN:5b6738bd-e97f-46e2-b5ea-e00dd7b93272	5b6738bd-e97f-46e2-b5ea-e00dd7b93272												PRESENT				Orcinus orca					iNaturalist:41521								Orcinus orca							Animalia	Chordata	Mammalia	Artiodactyla	Delphinidae	Orcinus	orca		species		(Linnaeus, 1758)
	imerss.org:BCCSN:5CD3A1CC-E472-45AB-8AE3-42F663A083A3	5CD3A1CC-E472-45AB-8AE3-42F663A083A3						15						PRESENT				Orcinus orca					iNaturalist:41521								Orcinus orca							Animalia	Chordata	Mammalia	Artiodactyla	Delphinidae	Orcinus	orca		species		(Linnaeus, 1758)
	imerss.org:BCCSN:5DB77D46-09BB-449E-97F4-A198E8D4EDB3	5DB77D46-09BB-449E-97F4-A198E8D4EDB3						1						PRESENT				Megaptera novaeangliae					iNaturalist:41566								Megaptera novaeangliae							Animalia	Chordata	Mammalia	Artiodactyla	Balaenopteridae	Megaptera	novaeangliae		species		(Borowski, 1781)
	imerss.org:BCCSN:5fe367cb-aaf2-4e1f-a6e6-74098e215aba	5fe367cb-aaf2-4e1f-a6e6-74098e215aba						1						PRESENT				Megaptera novaeangliae					iNaturalist:41566								Megaptera novaeangliae							Animalia	Chordata	Mammalia	Artiodactyla	Balaenopteridae	Megaptera	novaeangliae		species		(Borowski, 1781)
	imerss.org:BCCSN:62734905-3148-48B6-B73A-EA7717D6DCA0	62734905-3148-48B6-B73A-EA7717D6DCA0						4						PRESENT				Orcinus orca					iNaturalist:41521								Orcinus orca							Animalia	Chordata	Mammalia	Artiodactyla	Delphinidae	Orcinus	orca		species		(Linnaeus, 1758)
	imerss.org:BCCSN:62D585C9-4899-4C31-A47E-9791DC3B3416	62D585C9-4899-4C31-A47E-9791DC3B3416						5						PRESENT				Phocoenoides dalli					iNaturalist:41446								Phocoenoides dalli							Animalia	Chordata	Mammalia	Artiodactyla	Phocoenidae	Phocoenoides	dalli		species		(True, 1885)
	imerss.org:BCCSN:64019172-42C4-4B83-BAD4-734AB4555CA8	64019172-42C4-4B83-BAD4-734AB4555CA8						1						PRESENT				Megaptera novaeangliae					iNaturalist:41566								Megaptera novaeangliae							Animalia	Chordata	Mammalia	Artiodactyla	Balaenopteridae	Megaptera	novaeangliae		species		(Borowski, 1781)
	imerss.org:BCCSN:67b4e48a-b62c-4679-adde-c41d60b5d5f1	67b4e48a-b62c-4679-adde-c41d60b5d5f1												PRESENT				Orcinus orca					iNaturalist:41521								Orcinus orca							Animalia	Chordata	Mammalia	Artiodactyla	Delphinidae	Orcinus	orca		species		(Linnaeus, 1758)
	imerss.org:BCCSN:67f0a18f-1a3d-49e8-9d05-8813565de40a	67f0a18f-1a3d-49e8-9d05-8813565de40a												PRESENT				Orcinus orca					iNaturalist:41521								Orcinus orca							Animalia	Chordata	Mammalia	Artiodactyla	Delphinidae	Orcinus	orca		species		(Linnaeus, 1758)
	imerss.org:BCCSN:68269fe7-95f7-40b1-8b22-9388166f4c36	68269fe7-95f7-40b1-8b22-9388166f4c36												PRESENT				Orcinus orca					iNaturalist:41521								Orcinus orca							Animalia	Chordata	Mammalia	Artiodactyla	Delphinidae	Orcinus	orca		species		(Linnaeus, 1758)
	imerss.org:BCCSN:6ae30d53-180a-4e3d-b126-7891fb6dbd25	6ae30d53-180a-4e3d-b126-7891fb6dbd25												PRESENT				Megaptera novaeangliae					iNaturalist:41566								Megaptera novaeangliae							Animalia	Chordata	Mammalia	Artiodactyla	Balaenopteridae	Megaptera	novaeangliae		species		(Borowski, 1781)
	imerss.org:BCCSN:703C968B-FE50-4943-96C4-95E05F62DC7C	703C968B-FE50-4943-96C4-95E05F62DC7C						5						PRESENT				Orcinus orca					iNaturalist:41521								Orcinus orca							Animalia	Chordata	Mammalia	Artiodactyla	Delphinidae	Orcinus	orca		species		(Linnaeus, 1758)
	imerss.org:BCCSN:750c060a-a770-4260-8cc4-093487c39622	750c060a-a770-4260-8cc4-093487c39622												PRESENT				Orcinus orca					iNaturalist:41521								Orcinus orca							Animalia	Chordata	Mammalia	Artiodactyla	Delphinidae	Orcinus	orca		species		(Linnaeus, 1758)
	imerss.org:BCCSN:7558A345-8E8F-4C48-A2D7-B419ECE98F06	7558A345-8E8F-4C48-A2D7-B419ECE98F06												PRESENT				Megaptera novaeangliae					iNaturalist:41566								Megaptera novaeangliae							Animalia	Chordata	Mammalia	Artiodactyla	Balaenopteridae	Megaptera	novaeangliae		species		(Borowski, 1781)
	imerss.org:BCCSN:77c76eda-a569-4a8b-a685-7e9b4c1f67b2	77c76eda-a569-4a8b-a685-7e9b4c1f67b2												PRESENT				Orcinus orca					iNaturalist:41521								Orcinus orca							Animalia	Chordata	Mammalia	Artiodactyla	Delphinidae	Orcinus	orca		species		(Linnaeus, 1758)
	imerss.org:BCCSN:79a03267-7717-4af2-8d12-99080bd9379f	79a03267-7717-4af2-8d12-99080bd9379f						1						PRESENT				Megaptera novaeangliae					iNaturalist:41566								Megaptera novaeangliae							Animalia	Chordata	Mammalia	Artiodactyla	Balaenopteridae	Megaptera	novaeangliae		species		(Borowski, 1781)
	imerss.org:BCCSN:7A552DE8-8E2A-44BA-B0DD-59C11F3EEF6E	7A552DE8-8E2A-44BA-B0DD-59C11F3EEF6E						2						PRESENT				Megaptera novaeangliae					iNaturalist:41566								Megaptera novaeangliae							Animalia	Chordata	Mammalia	Artiodactyla	Balaenopteridae	Megaptera	novaeangliae		species		(Borowski, 1781)
	imerss.org:BCCSN:7B834B91-CA91-44A5-AF02-B97605042173	7B834B91-CA91-44A5-AF02-B97605042173						5						PRESENT				Orcinus orca					iNaturalist:41521								Orcinus orca							Animalia	Chordata	Mammalia	Artiodactyla	Delphinidae	Orcinus	orca		species		(Linnaeus, 1758)
	imerss.org:BCCSN:7ec96fa2-98ed-40af-912a-773f1cac10ff	7ec96fa2-98ed-40af-912a-773f1cac10ff												PRESENT				Orcinus orca					iNaturalist:41521								Orcinus orca							Animalia	Chordata	Mammalia	Artiodactyla	Delphinidae	Orcinus	orca		species		(Linnaeus, 1758)
	imerss.org:BCCSN:7f148278-d6a5-4369-836d-2987aee61a0f	7f148278-d6a5-4369-836d-2987aee61a0f						3						PRESENT				Orcinus orca					iNaturalist:41521								Orcinus orca							Animalia	Chordata	Mammalia	Artiodactyla	Delphinidae	Orcinus	orca		species		(Linnaeus, 1758)
	imerss.org:BCCSN:80c85246-ba38-466c-8018-6f5d69fde533	80c85246-ba38-466c-8018-6f5d69fde533						1						PRESENT				Megaptera novaeangliae					iNaturalist:41566								Megaptera novaeangliae							Animalia	Chordata	Mammalia	Artiodactyla	Balaenopteridae	Megaptera	novaeangliae		species		(Borowski, 1781)
	imerss.org:BCCSN:8168b904-8f80-4e5c-b983-a248da885269	8168b904-8f80-4e5c-b983-a248da885269						20						PRESENT				Orcinus orca					iNaturalist:41521								Orcinus orca							Animalia	Chordata	Mammalia	Artiodactyla	Delphinidae	Orcinus	orca		species		(Linnaeus, 1758)
	imerss.org:BCCSN:842c84ec-df48-4844-9f6f-f66d07b174e8	842c84ec-df48-4844-9f6f-f66d07b174e8												PRESENT				Megaptera novaeangliae					iNaturalist:41566								Megaptera novaeangliae							Animalia	Chordata	Mammalia	Artiodactyla	Balaenopteridae	Megaptera	novaeangliae		species		(Borowski, 1781)
	imerss.org:BCCSN:854f2f69-0a64-4766-85ce-c8ff34f82082	854f2f69-0a64-4766-85ce-c8ff34f82082												PRESENT				Orcinus orca					iNaturalist:41521								Orcinus orca							Animalia	Chordata	Mammalia	Artiodactyla	Delphinidae	Orcinus	orca		species		(Linnaeus, 1758)
	imerss.org:BCCSN:87EF9F96-4F5A-4A4C-86ED-B709C443245B	87EF9F96-4F5A-4A4C-86ED-B709C443245B						5						PRESENT				Orcinus orca					iNaturalist:41521								Orcinus orca							Animalia	Chordata	Mammalia	Artiodactyla	Delphinidae	Orcinus	orca		species		(Linnaeus, 1758)
	imerss.org:BCCSN:8991A5A1-E06E-43B6-A27C-B0260DE725FC	8991A5A1-E06E-43B6-A27C-B0260DE725FC						8						PRESENT				Orcinus orca					iNaturalist:41521								Orcinus orca							Animalia	Chordata	Mammalia	Artiodactyla	Delphinidae	Orcinus	orca		species		(Linnaeus, 1758)
	imerss.org:BCCSN:8bc64ddd-7594-4dce-af69-65a3de6fea1b	8bc64ddd-7594-4dce-af69-65a3de6fea1b						3						PRESENT				Orcinus orca					iNaturalist:41521								Orcinus orca							Animalia	Chordata	Mammalia	Artiodactyla	Delphinidae	Orcinus	orca		species		(Linnaeus, 1758)
	imerss.org:BCCSN:8C78405F-2E71-47F9-A760-B87FFA1DC854	8C78405F-2E71-47F9-A760-B87FFA1DC854						10						PRESENT				Orcinus orca					iNaturalist:41521								Orcinus orca							Animalia	Chordata	Mammalia	Artiodactyla	Delphinidae	Orcinus	orca		species		(Linnaeus, 1758)
	imerss.org:BCCSN:8C8978DF-F68F-418D-BE3A-561D2DF05FB2	8C8978DF-F68F-418D-BE3A-561D2DF05FB2						1						PRESENT				Megaptera novaeangliae					iNaturalist:41566								Megaptera novaeangliae							Animalia	Chordata	Mammalia	Artiodactyla	Balaenopteridae	Megaptera	novaeangliae		species		(Borowski, 1781)
	imerss.org:BCCSN:8CCAF4AF-C09A-44FC-A116-12E79B442F41	8CCAF4AF-C09A-44FC-A116-12E79B442F41												PRESENT				Orcinus orca					iNaturalist:41521								Orcinus orca							Animalia	Chordata	Mammalia	Artiodactyla	Delphinidae	Orcinus	orca		species		(Linnaeus, 1758)
	imerss.org:BCCSN:8DFA5293-FB1C-433C-ACEF-BFAB80DEA8FA	8DFA5293-FB1C-433C-ACEF-BFAB80DEA8FA						2						PRESENT				Megaptera novaeangliae					iNaturalist:41566								Megaptera novaeangliae							Animalia	Chordata	Mammalia	Artiodactyla	Balaenopteridae	Megaptera	novaeangliae		species		(Borowski, 1781)
	imerss.org:BCCSN:8ef66f6b-faf4-4532-b20b-b6da3fda45de	8ef66f6b-faf4-4532-b20b-b6da3fda45de												PRESENT				Megaptera novaeangliae					iNaturalist:41566								Megaptera novaeangliae							Animalia	Chordata	Mammalia	Artiodactyla	Balaenopteridae	Megaptera	novaeangliae		species		(Borowski, 1781)
	imerss.org:BCCSN:900ab405-05c8-4c8d-b593-1872894f681d	900ab405-05c8-4c8d-b593-1872894f681d						5						PRESENT				Orcinus orca					iNaturalist:41521								Orcinus orca							Animalia	Chordata	Mammalia	Artiodactyla	Delphinidae	Orcinus	orca		species		(Linnaeus, 1758)
	imerss.org:BCCSN:9090DAA2-0BC4-48AF-932D-32B8203DC9D5	9090DAA2-0BC4-48AF-932D-32B8203DC9D5												PRESENT				Phocoena phocoena					iNaturalist:41440								Phocoena phocoena							Animalia	Chordata	Mammalia	Artiodactyla	Phocoenidae	Phocoena	phocoena		species		(Linnaeus, 1758)
	imerss.org:BCCSN:99F7F040-1419-40CD-9E62-A84AB7D79DB2	99F7F040-1419-40CD-9E62-A84AB7D79DB2						6						PRESENT				Orcinus orca					iNaturalist:41521								Orcinus orca							Animalia	Chordata	Mammalia	Artiodactyla	Delphinidae	Orcinus	orca		species		(Linnaeus, 1758)
	imerss.org:BCCSN:9B757980-47E9-499E-A77F-83F32CC83A3B	9B757980-47E9-499E-A77F-83F32CC83A3B						4						PRESENT				Orcinus orca					iNaturalist:41521								Orcinus orca							Animalia	Chordata	Mammalia	Artiodactyla	Delphinidae	Orcinus	orca		species		(Linnaeus, 1758)
	imerss.org:BCCSN:9ba2e18b-98da-413a-a1c7-eb346547b934	9ba2e18b-98da-413a-a1c7-eb346547b934												PRESENT				Phocoena phocoena					iNaturalist:41440								Phocoena phocoena							Animalia	Chordata	Mammalia	Artiodactyla	Phocoenidae	Phocoena	phocoena		species		(Linnaeus, 1758)
	imerss.org:BCCSN:9d431586-ea08-4920-9f32-b4509ec5dcff	9d431586-ea08-4920-9f32-b4509ec5dcff												PRESENT				Orcinus orca					iNaturalist:41521								Orcinus orca							Animalia	Chordata	Mammalia	Artiodactyla	Delphinidae	Orcinus	orca		species		(Linnaeus, 1758)
	imerss.org:BCCSN:9ddc2585-ebd6-445a-9937-4ec3ca647ad2	9ddc2585-ebd6-445a-9937-4ec3ca647ad2												PRESENT				Orcinus orca					iNaturalist:41521								Orcinus orca							Animalia	Chordata	Mammalia	Artiodactyla	Delphinidae	Orcinus	orca		species		(Linnaeus, 1758)
	imerss.org:BCCSN:9F6876D6-1A0D-4F0C-9986-C658611E69E3	9F6876D6-1A0D-4F0C-9986-C658611E69E3						3						PRESENT				Orcinus orca					iNaturalist:41521								Orcinus orca							Animalia	Chordata	Mammalia	Artiodactyla	Delphinidae	Orcinus	orca		species		(Linnaeus, 1758)
	imerss.org:BCCSN:9fef5111-e204-4fd2-8ba9-28a8304eaede	9fef5111-e204-4fd2-8ba9-28a8304eaede						4						PRESENT				Orcinus orca					iNaturalist:41521								Orcinus orca							Animalia	Chordata	Mammalia	Artiodactyla	Delphinidae	Orcinus	orca		species		(Linnaeus, 1758)
	imerss.org:BCCSN:a0109b2a-adcf-4194-b3a5-d7d22617b613	a0109b2a-adcf-4194-b3a5-d7d22617b613						1						PRESENT				Megaptera novaeangliae					iNaturalist:41566								Megaptera novaeangliae							Animalia	Chordata	Mammalia	Artiodactyla	Balaenopteridae	Megaptera	novaeangliae		species		(Borowski, 1781)
	imerss.org:BCCSN:a020c579-3dee-4328-ad85-eef9aea2047f	a020c579-3dee-4328-ad85-eef9aea2047f												PRESENT				Megaptera novaeangliae					iNaturalist:41566								Megaptera novaeangliae							Animalia	Chordata	Mammalia	Artiodactyla	Balaenopteridae	Megaptera	novaeangliae		species		(Borowski, 1781)
	imerss.org:BCCSN:A07CB19F-43DC-4A1C-9F1C-76FF07034449	A07CB19F-43DC-4A1C-9F1C-76FF07034449						3						PRESENT				Orcinus orca					iNaturalist:41521								Orcinus orca							Animalia	Chordata	Mammalia	Artiodactyla	Delphinidae	Orcinus	orca		species		(Linnaeus, 1758)
	imerss.org:BCCSN:A12DAC1E-0A37-496A-8BD9-F27B6A430588	A12DAC1E-0A37-496A-8BD9-F27B6A430588						6						PRESENT				Orcinus orca					iNaturalist:41521								Orcinus orca							Animalia	Chordata	Mammalia	Artiodactyla	Delphinidae	Orcinus	orca		species		(Linnaeus, 1758)
	imerss.org:BCCSN:a1cec014-fe1a-45b7-b1c5-1b0d738822e2	a1cec014-fe1a-45b7-b1c5-1b0d738822e2												PRESENT				Orcinus orca					iNaturalist:41521								Orcinus orca							Animalia	Chordata	Mammalia	Artiodactyla	Delphinidae	Orcinus	orca		species		(Linnaeus, 1758)
	imerss.org:BCCSN:A312CBA9-E119-4166-B0F4-9C75656653B4	A312CBA9-E119-4166-B0F4-9C75656653B4						1						PRESENT				Orcinus orca					iNaturalist:41521								Orcinus orca							Animalia	Chordata	Mammalia	Artiodactyla	Delphinidae	Orcinus	orca		species		(Linnaeus, 1758)
	imerss.org:BCCSN:A4A40345-681D-4D98-95F2-67A73B9B49C9	A4A40345-681D-4D98-95F2-67A73B9B49C9						6						PRESENT				Orcinus orca					iNaturalist:41521								Orcinus orca							Animalia	Chordata	Mammalia	Artiodactyla	Delphinidae	Orcinus	orca		species		(Linnaeus, 1758)
	imerss.org:BCCSN:a713753a-c338-4e98-8a99-1227ea729abf	a713753a-c338-4e98-8a99-1227ea729abf												PRESENT				Megaptera novaeangliae					iNaturalist:41566								Megaptera novaeangliae							Animalia	Chordata	Mammalia	Artiodactyla	Balaenopteridae	Megaptera	novaeangliae		species		(Borowski, 1781)
	imerss.org:BCCSN:A72B2727-A3DE-4007-9269-DBC2A7409C5C	A72B2727-A3DE-4007-9269-DBC2A7409C5C						3						PRESENT				Orcinus orca					iNaturalist:41521								Orcinus orca							Animalia	Chordata	Mammalia	Artiodactyla	Delphinidae	Orcinus	orca		species		(Linnaeus, 1758)
	imerss.org:BCCSN:a740d0b8-411e-47fe-94be-4ec8b676fea2	a740d0b8-411e-47fe-94be-4ec8b676fea2						4						PRESENT				Orcinus orca					iNaturalist:41521								Orcinus orca							Animalia	Chordata	Mammalia	Artiodactyla	Delphinidae	Orcinus	orca		species		(Linnaeus, 1758)
	imerss.org:BCCSN:A802B103-056C-4CAB-8732-9F1D25C87E82	A802B103-056C-4CAB-8732-9F1D25C87E82						6						PRESENT				Orcinus orca					iNaturalist:41521								Orcinus orca							Animalia	Chordata	Mammalia	Artiodactyla	Delphinidae	Orcinus	orca		species		(Linnaeus, 1758)
	imerss.org:BCCSN:A82AADCF-A714-4646-AAF8-D3B1B25A6F86	A82AADCF-A714-4646-AAF8-D3B1B25A6F86						1						PRESENT				Megaptera novaeangliae					iNaturalist:41566								Megaptera novaeangliae							Animalia	Chordata	Mammalia	Artiodactyla	Balaenopteridae	Megaptera	novaeangliae		species		(Borowski, 1781)
	imerss.org:BCCSN:a82abfa4-d474-460f-b0ba-2fead41ae895	a82abfa4-d474-460f-b0ba-2fead41ae895												PRESENT				Orcinus orca					iNaturalist:41521								Orcinus orca							Animalia	Chordata	Mammalia	Artiodactyla	Delphinidae	Orcinus	orca		species		(Linnaeus, 1758)
	imerss.org:BCCSN:a89063ce-c404-4f76-9303-b81ec52d59df	a89063ce-c404-4f76-9303-b81ec52d59df												PRESENT				Megaptera novaeangliae					iNaturalist:41566								Megaptera novaeangliae							Animalia	Chordata	Mammalia	Artiodactyla	Balaenopteridae	Megaptera	novaeangliae		species		(Borowski, 1781)
	imerss.org:BCCSN:a8a6f64e-cd71-40c6-a1f2-e53eb10d8e67	a8a6f64e-cd71-40c6-a1f2-e53eb10d8e67												PRESENT				Orcinus orca					iNaturalist:41521								Orcinus orca							Animalia	Chordata	Mammalia	Artiodactyla	Delphinidae	Orcinus	orca		species		(Linnaeus, 1758)
	imerss.org:BCCSN:A901B12E-617C-4336-B358-7849C4A104C2	A901B12E-617C-4336-B358-7849C4A104C2						4						PRESENT				Orcinus orca					iNaturalist:41521								Orcinus orca							Animalia	Chordata	Mammalia	Artiodactyla	Delphinidae	Orcinus	orca		species		(Linnaeus, 1758)
	imerss.org:BCCSN:A9251D62-A774-4C35-BCC5-28D7E4800509	A9251D62-A774-4C35-BCC5-28D7E4800509						12						PRESENT				Orcinus orca					iNaturalist:41521								Orcinus orca							Animalia	Chordata	Mammalia	Artiodactyla	Delphinidae	Orcinus	orca		species		(Linnaeus, 1758)
	imerss.org:BCCSN:AA3E7777-2834-4DE8-8EFF-51FB994192FD	AA3E7777-2834-4DE8-8EFF-51FB994192FD						8						PRESENT				Orcinus orca					iNaturalist:41521								Orcinus orca							Animalia	Chordata	Mammalia	Artiodactyla	Delphinidae	Orcinus	orca		species		(Linnaeus, 1758)
	imerss.org:BCCSN:AA59D612-E18B-45BF-BB00-ACD391D21E39	AA59D612-E18B-45BF-BB00-ACD391D21E39						5						PRESENT				Orcinus orca					iNaturalist:41521								Orcinus orca							Animalia	Chordata	Mammalia	Artiodactyla	Delphinidae	Orcinus	orca		species		(Linnaeus, 1758)
	imerss.org:BCCSN:AAAEA8E8-0BFF-4685-A4BC-A0D18058EB90	AAAEA8E8-0BFF-4685-A4BC-A0D18058EB90						3						PRESENT				Orcinus orca					iNaturalist:41521								Orcinus orca							Animalia	Chordata	Mammalia	Artiodactyla	Delphinidae	Orcinus	orca		species		(Linnaeus, 1758)
	imerss.org:BCCSN:AC160F28-F537-4E5B-8127-055C90C2CDC2	AC160F28-F537-4E5B-8127-055C90C2CDC2						1						PRESENT				Megaptera novaeangliae					iNaturalist:41566								Megaptera novaeangliae							Animalia	Chordata	Mammalia	Artiodactyla	Balaenopteridae	Megaptera	novaeangliae		species		(Borowski, 1781)
	imerss.org:BCCSN:AC32FC79-39D0-4603-881D-6A4D4DE5F9BF	AC32FC79-39D0-4603-881D-6A4D4DE5F9BF						10						PRESENT				Orcinus orca					iNaturalist:41521								Orcinus orca							Animalia	Chordata	Mammalia	Artiodactyla	Delphinidae	Orcinus	orca		species		(Linnaeus, 1758)
	imerss.org:BCCSN:AE09E35C-701E-4C66-BECF-836330F37876	AE09E35C-701E-4C66-BECF-836330F37876						4						PRESENT				Orcinus orca					iNaturalist:41521								Orcinus orca							Animalia	Chordata	Mammalia	Artiodactyla	Delphinidae	Orcinus	orca		species		(Linnaeus, 1758)
	imerss.org:BCCSN:AE45BAE8-1628-4D3B-8565-55C93F2ABFD2	AE45BAE8-1628-4D3B-8565-55C93F2ABFD2						4						PRESENT				Orcinus orca					iNaturalist:41521								Orcinus orca							Animalia	Chordata	Mammalia	Artiodactyla	Delphinidae	Orcinus	orca		species		(Linnaeus, 1758)
	imerss.org:BCCSN:b2df9272-ec91-4e0b-a6be-5323cde248a6	b2df9272-ec91-4e0b-a6be-5323cde248a6						4						PRESENT				Orcinus orca					iNaturalist:41521								Orcinus orca							Animalia	Chordata	Mammalia	Artiodactyla	Delphinidae	Orcinus	orca		species		(Linnaeus, 1758)
	imerss.org:BCCSN:b4d823e0-366d-489f-860d-949d08bca98f	b4d823e0-366d-489f-860d-949d08bca98f												PRESENT				Megaptera novaeangliae					iNaturalist:41566								Megaptera novaeangliae							Animalia	Chordata	Mammalia	Artiodactyla	Balaenopteridae	Megaptera	novaeangliae		species		(Borowski, 1781)
	imerss.org:BCCSN:B8839AC4-125E-448E-94D8-1896B9BC1776	B8839AC4-125E-448E-94D8-1896B9BC1776						3						PRESENT				Orcinus orca					iNaturalist:41521								Orcinus orca							Animalia	Chordata	Mammalia	Artiodactyla	Delphinidae	Orcinus	orca		species		(Linnaeus, 1758)
	imerss.org:BCCSN:ba3e5463-ae8c-4baf-950a-655ff4860288	ba3e5463-ae8c-4baf-950a-655ff4860288												PRESENT				Orcinus orca					iNaturalist:41521								Orcinus orca							Animalia	Chordata	Mammalia	Artiodactyla	Delphinidae	Orcinus	orca		species		(Linnaeus, 1758)
	imerss.org:BCCSN:C279A958-9081-49E3-A39C-FB653311FB2B	C279A958-9081-49E3-A39C-FB653311FB2B						2						PRESENT				Megaptera novaeangliae					iNaturalist:41566								Megaptera novaeangliae							Animalia	Chordata	Mammalia	Artiodactyla	Balaenopteridae	Megaptera	novaeangliae		species		(Borowski, 1781)
	imerss.org:BCCSN:c2defa2b-266b-41d3-a1d2-4869ec985bd3	c2defa2b-266b-41d3-a1d2-4869ec985bd3												PRESENT				Orcinus orca					iNaturalist:41521								Orcinus orca							Animalia	Chordata	Mammalia	Artiodactyla	Delphinidae	Orcinus	orca		species		(Linnaeus, 1758)
	imerss.org:BCCSN:C348A0D1-03B8-4865-839C-1D31EF7D2750	C348A0D1-03B8-4865-839C-1D31EF7D2750						1						PRESENT				Megaptera novaeangliae					iNaturalist:41566								Megaptera novaeangliae							Animalia	Chordata	Mammalia	Artiodactyla	Balaenopteridae	Megaptera	novaeangliae		species		(Borowski, 1781)
	imerss.org:BCCSN:c7f653af-ed4b-4be6-a5e3-bd2faaa81428	c7f653af-ed4b-4be6-a5e3-bd2faaa81428												PRESENT				Orcinus orca					iNaturalist:41521								Orcinus orca							Animalia	Chordata	Mammalia	Artiodactyla	Delphinidae	Orcinus	orca		species		(Linnaeus, 1758)
	imerss.org:BCCSN:C9AC6632-6665-4B26-A866-090BA03E1C1A	C9AC6632-6665-4B26-A866-090BA03E1C1A						5						PRESENT				Orcinus orca					iNaturalist:41521								Orcinus orca							Animalia	Chordata	Mammalia	Artiodactyla	Delphinidae	Orcinus	orca		species		(Linnaeus, 1758)
	imerss.org:BCCSN:cc3a30a9-5a6c-495a-9b3b-28ef4b9478d5	cc3a30a9-5a6c-495a-9b3b-28ef4b9478d5						24						PRESENT				Orcinus orca					iNaturalist:41521								Orcinus orca							Animalia	Chordata	Mammalia	Artiodactyla	Delphinidae	Orcinus	orca		species		(Linnaeus, 1758)
	imerss.org:BCCSN:CC98141A-2BBC-4657-8AC9-C69E57B21069	CC98141A-2BBC-4657-8AC9-C69E57B21069												PRESENT				Orcinus orca					iNaturalist:41521								Orcinus orca							Animalia	Chordata	Mammalia	Artiodactyla	Delphinidae	Orcinus	orca		species		(Linnaeus, 1758)
	imerss.org:BCCSN:D1316AF4-A03B-4D6C-AC68-EEFE29FABDD9	D1316AF4-A03B-4D6C-AC68-EEFE29FABDD9												PRESENT				Orcinus orca					iNaturalist:41521								Orcinus orca							Animalia	Chordata	Mammalia	Artiodactyla	Delphinidae	Orcinus	orca		species		(Linnaeus, 1758)
	imerss.org:BCCSN:d186a690-1155-470f-be84-37320cf41fb8	d186a690-1155-470f-be84-37320cf41fb8						3						PRESENT				Orcinus orca					iNaturalist:41521								Orcinus orca							Animalia	Chordata	Mammalia	Artiodactyla	Delphinidae	Orcinus	orca		species		(Linnaeus, 1758)
	imerss.org:BCCSN:D1F07B73-3FA1-4F61-94B9-F33BA94B9360	D1F07B73-3FA1-4F61-94B9-F33BA94B9360						3						PRESENT				Orcinus orca					iNaturalist:41521								Orcinus orca							Animalia	Chordata	Mammalia	Artiodactyla	Delphinidae	Orcinus	orca		species		(Linnaeus, 1758)
	imerss.org:BCCSN:d1f8cecc-de25-40e5-8999-6a516e8e9eb8	d1f8cecc-de25-40e5-8999-6a516e8e9eb8						16						PRESENT				Orcinus orca					iNaturalist:41521								Orcinus orca							Animalia	Chordata	Mammalia	Artiodactyla	Delphinidae	Orcinus	orca		species		(Linnaeus, 1758)
	imerss.org:BCCSN:D4A7BA40-E627-408A-B849-8BFEA7060884	D4A7BA40-E627-408A-B849-8BFEA7060884						1						PRESENT				Megaptera novaeangliae					iNaturalist:41566								Megaptera novaeangliae							Animalia	Chordata	Mammalia	Artiodactyla	Balaenopteridae	Megaptera	novaeangliae		species		(Borowski, 1781)
	imerss.org:BCCSN:d5f0af62-3a41-4a9c-a7d8-9fc4bb5b0c28	d5f0af62-3a41-4a9c-a7d8-9fc4bb5b0c28						4						PRESENT				Orcinus orca					iNaturalist:41521								Orcinus orca							Animalia	Chordata	Mammalia	Artiodactyla	Delphinidae	Orcinus	orca		species		(Linnaeus, 1758)
	imerss.org:BCCSN:d71cb06e-5b23-4e6f-8632-22471dcf1797	d71cb06e-5b23-4e6f-8632-22471dcf1797						4						PRESENT				Orcinus orca					iNaturalist:41521								Orcinus orca							Animalia	Chordata	Mammalia	Artiodactyla	Delphinidae	Orcinus	orca		species		(Linnaeus, 1758)
	imerss.org:BCCSN:DBDD5B8B-D420-4484-BB26-431F4C7C7E96	DBDD5B8B-D420-4484-BB26-431F4C7C7E96						5						PRESENT				Orcinus orca					iNaturalist:41521								Orcinus orca							Animalia	Chordata	Mammalia	Artiodactyla	Delphinidae	Orcinus	orca		species		(Linnaeus, 1758)
	imerss.org:BCCSN:de943324-b402-4ba5-80c3-161dadf2ac04	de943324-b402-4ba5-80c3-161dadf2ac04						3						PRESENT				Phocoena phocoena					iNaturalist:41440								Phocoena phocoena							Animalia	Chordata	Mammalia	Artiodactyla	Phocoenidae	Phocoena	phocoena		species		(Linnaeus, 1758)
	imerss.org:BCCSN:DFD2F2BB-9176-41FF-B1BF-A13FC2A9E1A5	DFD2F2BB-9176-41FF-B1BF-A13FC2A9E1A5						15						PRESENT				Orcinus orca					iNaturalist:41521								Orcinus orca							Animalia	Chordata	Mammalia	Artiodactyla	Delphinidae	Orcinus	orca		species		(Linnaeus, 1758)
	imerss.org:BCCSN:e1ca6890-a0be-415b-80a4-20e06dc50833	e1ca6890-a0be-415b-80a4-20e06dc50833						20						PRESENT				Orcinus orca					iNaturalist:41521								Orcinus orca							Animalia	Chordata	Mammalia	Artiodactyla	Delphinidae	Orcinus	orca		species		(Linnaeus, 1758)
	imerss.org:BCCSN:E41E584C-283A-47B1-ADD9-D3A9BE2CFD4A	E41E584C-283A-47B1-ADD9-D3A9BE2CFD4A						5						PRESENT				Orcinus orca					iNaturalist:41521								Orcinus orca							Animalia	Chordata	Mammalia	Artiodactyla	Delphinidae	Orcinus	orca		species		(Linnaeus, 1758)
	imerss.org:BCCSN:E4C5B9D5-953D-4DEE-AADC-0E61C04D9BEC	E4C5B9D5-953D-4DEE-AADC-0E61C04D9BEC												PRESENT				Megaptera novaeangliae					iNaturalist:41566								Megaptera novaeangliae							Animalia	Chordata	Mammalia	Artiodactyla	Balaenopteridae	Megaptera	novaeangliae		species		(Borowski, 1781)
	imerss.org:BCCSN:EC454CA5-0013-4A1D-A657-6BAC4E53A8C7	EC454CA5-0013-4A1D-A657-6BAC4E53A8C7						2						PRESENT				Megaptera novaeangliae					iNaturalist:41566								Megaptera novaeangliae							Animalia	Chordata	Mammalia	Artiodactyla	Balaenopteridae	Megaptera	novaeangliae		species		(Borowski, 1781)
	imerss.org:BCCSN:edca4249-81b1-4a87-8b2e-2a68b2629ea1	edca4249-81b1-4a87-8b2e-2a68b2629ea1												PRESENT				Orcinus orca					iNaturalist:41521								Orcinus orca							Animalia	Chordata	Mammalia	Artiodactyla	Delphinidae	Orcinus	orca		species		(Linnaeus, 1758)
	imerss.org:BCCSN:EE3306A3-E217-45A4-B9A7-D83F6C24AFEB	EE3306A3-E217-45A4-B9A7-D83F6C24AFEB						2						PRESENT				Orcinus orca					iNaturalist:41521								Orcinus orca							Animalia	Chordata	Mammalia	Artiodactyla	Delphinidae	Orcinus	orca		species		(Linnaeus, 1758)
	imerss.org:BCCSN:F1CAC04F-ED15-4359-A8AA-3739F5FA1A30	F1CAC04F-ED15-4359-A8AA-3739F5FA1A30						5						PRESENT				Orcinus orca					iNaturalist:41521								Orcinus orca							Animalia	Chordata	Mammalia	Artiodactyla	Delphinidae	Orcinus	orca		species		(Linnaeus, 1758)
	imerss.org:BCCSN:f3d9419e-7405-45b2-a115-2539bac5d5b9	f3d9419e-7405-45b2-a115-2539bac5d5b9												PRESENT				Orcinus orca					iNaturalist:41521								Orcinus orca							Animalia	Chordata	Mammalia	Artiodactyla	Delphinidae	Orcinus	orca		species		(Linnaeus, 1758)
	imerss.org:BCCSN:f5c6d799-d0c4-4ee6-a63e-e8a5506138c6	f5c6d799-d0c4-4ee6-a63e-e8a5506138c6						4						PRESENT				Orcinus orca					iNaturalist:41521								Orcinus orca							Animalia	Chordata	Mammalia	Artiodactyla	Delphinidae	Orcinus	orca		species		(Linnaeus, 1758)
	imerss.org:BCCSN:FF09872A-5F42-4DF8-9BD6-B062B0F9F9A5	FF09872A-5F42-4DF8-9BD6-B062B0F9F9A5						4						PRESENT				Orcinus orca					iNaturalist:41521								Orcinus orca							Animalia	Chordata	Mammalia	Artiodactyla	Delphinidae	Orcinus	orca		species		(Linnaeus, 1758)
	imerss.org:BCCSN:FF207D61-B8DB-4AAF-8245-7C02B7AF4771	FF207D61-B8DB-4AAF-8245-7C02B7AF4771						7						PRESENT				Orcinus orca					iNaturalist:41521								Orcinus orca							Animalia	Chordata	Mammalia	Artiodactyla	Delphinidae	Orcinus	orca		species		(Linnaeus, 1758)
[truncated: 105 more columns]

## Sheet: ExternalLinks
Taxon_Local_ID	Link type	Link
